# Supplementary material for: Conformationally enforced planarization of bis[1]benzothieno[1,4]thiazines: a rational design of redox-active fluorophores with increased radical cation stability
Source: Royal Society of Chemistry journal article supplement (doi:10.1039/d4qo01155d), 2024-01-01
Supplement: d4qo01155d1.pdf [file d4qo01155d1.pdf]

# Supporting Information

Conformationally enforced planarization of  
bis[1]benzothieno[1,4]thiazines:

A rational design of redox-active fluorophores with increased radical  
cation stability

Simone T. Hauer,<sup>a</sup> Patrick Kuhn,<sup>a</sup> J. Maurice Pütz,<sup>b</sup> Guido J. Reiss,<sup>b</sup> Lukas P. Sorge,<sup>c</sup>  
Christian Ganter,<sup>b</sup> Katja Heinze,<sup>c</sup> Thomas J. J. Müller\*<sup>a</sup>

<sup>a</sup>Institut für Organische Chemie und Makromolekulare Chemie, Heinrich-Heine-Universität  
Düsseldorf, Universitätsstraße 1, D-40225 Düsseldorf, Germany, e-mail:  
ThomasJJ.Mueller@hhu.de.

<sup>b</sup>Institut für Anorganische Chemie und Strukturchemie, Heinrich-Heine-Universität  
Düsseldorf, Universitätsstraße 1, D-40225 Düsseldorf, Germany.

<sup>c</sup>Institut für Chemie, Johannes-Gutenberg-Universität Mainz, Duesbergweg 10-14, D-55128  
Mainz, Germany.

# Table of Contents

|       |                                                                                    |    |
|-------|------------------------------------------------------------------------------------|----|
| 1     | Synthesis .....                                                                    | 5  |
| 1.1   | General Information.....                                                           | 5  |
| 1.1.1 | Synthesis .....                                                                    | 5  |
| 1.1.2 | Characterization .....                                                             | 5  |
| 1.1.3 | Analysis of optoelectronic properties .....                                        | 6  |
| 1.2   | Synthesis of BBTTs.....                                                            | 6  |
| 1.2.1 | Starting materials .....                                                           | 6  |
| 1.2.2 | General procedures .....                                                           | 6  |
| 1.2.3 | <i>Anti-anti-N-ortho</i> -substituted-Phenyl-BBTT 3a-e .....                       | 8  |
| 1.2.4 | <i>Anti-anti-N-ortho,ortho'</i> -disubstituted-Phenyl-BBTT 3f-t.....               | 12 |
| 1.2.5 | <i>Anti-anti-3,9-dibromo-N-ortho(,ortho')</i> -(di)substituted-Phenyl-BBTT 4 ..... | 22 |
| 1.2.6 | Byproducts .....                                                                   | 25 |
| 2     | NMR-data.....                                                                      | 26 |
| 2.1   | BBTTs.....                                                                         | 26 |
| 2.1.1 | <i>Anti-anti-N-ortho</i> -substituted-Phenyl-BBTT 3a-e .....                       | 26 |
| 2.1.2 | <i>Anti-anti-N-ortho,ortho'</i> -disubstituted-Phenyl-BBTT .....                   | 31 |
| 2.1.3 | <i>Anti-anti-3,9-dibromo-N-ortho(,ortho')</i> -(di)substituted-Phenyl-BBTT 4 ..... | 49 |
| 3     | Crystal structures and data.....                                                   | 53 |
| 3.1   | Molecular structure.....                                                           | 53 |
| 3.1.1 | Table for angles .....                                                             | 55 |
| 3.1.2 | Tables for crystallographic data.....                                              | 58 |
| 3.2   | Superimposed crystal packing patterns .....                                        | 66 |
| 3.3   | NICS-calculations.....                                                             | 68 |
| 4     | BBTT as a multistage redox system .....                                            | 86 |
| 4.1   | Cyclic voltammetry .....                                                           | 86 |
| 4.1.1 | CVs.....                                                                           | 86 |
| 4.1.2 | Nernstian reversibility .....                                                      | 87 |

|        |                                                                                                                        |     |
|--------|------------------------------------------------------------------------------------------------------------------------|-----|
| 4.2    | DFT-examination of radical cations .....                                                                               | 88  |
| 4.3    | Computed SCF energies, Gibbs free energies and HOMO energies of <i>N-intra</i> -conformers and transition states ..... | 89  |
| 4.4    | Calculation of redox potentials of 3.....                                                                              | 93  |
| 4.4.1  | Computation of redox potentials of 3 by means of DFT-quantum mechanical calculation .....                              | 93  |
| 4.4.2  | Computation of redox potentials of 3f-t by means of experimental data.....                                             | 96  |
| 4.5    | Spectroelectrochemistry .....                                                                                          | 98  |
| 5      | Photophysics.....                                                                                                      | 100 |
| 5.1    | UV/vis absorption and emission spectra.....                                                                            | 100 |
| 5.2    | TD-DFT-computed and experimental UV/vis absorption and emission data .....                                             | 102 |
| 6      | Computational details.....                                                                                             | 106 |
| 6.1    | <i>anti-anti-N-ortho(,ortho')</i> -(di)substituted-phenyl-BBTT 3 .....                                                 | 106 |
| 6.1.1  | <i>anti-anti-N-ortho</i> -cyanophenyl-BBTT 3a .....                                                                    | 106 |
| 6.1.2  | <i>anti-anti-N-ortho</i> -chlorophenyl-BBTT 3b .....                                                                   | 118 |
| 6.1.3  | <i>anti-anti-N-ortho</i> -fluorophenyl-BBTT 3c.....                                                                    | 129 |
| 6.1.4  | <i>anti-anti-N-ortho</i> -methylphenyl-BBTT 3d .....                                                                   | 141 |
| 6.1.5  | <i>anti-anti-N-ortho</i> -methoxyphenyl-BBTT 3e .....                                                                  | 155 |
| 6.1.6  | <i>anti-anti-N-ortho,ortho'</i> -dicyanophenyl-BBTT 3f.....                                                            | 167 |
| 6.1.7  | <i>anti-anti-N-ortho,ortho'</i> -cyanochlorophenyl-BBTT 3k.....                                                        | 176 |
| 6.1.8  | <i>anti-anti-N-ortho,ortho'</i> -cyanofluorophenyl-BBTT 3l.....                                                        | 182 |
| 6.1.9  | <i>anti-anti-N-ortho,ortho'</i> -cyanomethylphenyl-BBTT 3m.....                                                        | 188 |
| 6.1.10 | <i>anti-anti-N-ortho,ortho'</i> -cyanomethoxyphenyl-BBTT 3n.....                                                       | 195 |
| 6.1.11 | <i>anti-anti-N-ortho,ortho'</i> -dichlorophenyl-BBTT 3g .....                                                          | 201 |
| 6.1.12 | <i>anti-anti-N-ortho,ortho'</i> -chlorofluorophenyl-BBTT 3o .....                                                      | 211 |
| 6.1.13 | <i>anti-anti-N-ortho,ortho'</i> -chloromethylphenyl-BBTT 3p.....                                                       | 217 |
| 6.1.14 | <i>anti-anti-N-ortho,ortho'</i> -chloromethoxyphenyl-BBTT 3q.....                                                      | 223 |
| 6.1.15 | <i>anti-anti-N-ortho,ortho'</i> -difluorophenyl-BBTT 3h .....                                                          | 229 |

|        |                                                                                      |     |
|--------|--------------------------------------------------------------------------------------|-----|
| 6.1.16 | <i>anti-anti-N-ortho,ortho'</i> -fluoromethylphenyl-BBTT 3r .....                    | 239 |
| 6.1.17 | <i>anti-anti-N-ortho,ortho'</i> -fluoromethoxyphenyl-BBTT 3s.....                    | 244 |
| 6.1.18 | <i>anti-anti-N-ortho,ortho'</i> -dimethylphenyl-BBTT 3i.....                         | 250 |
| 6.1.19 | <i>anti-anti-N-ortho,ortho'</i> -methylmethoxyphenyl-BBTT 3t.....                    | 263 |
| 6.1.20 | <i>anti-anti-N-ortho,ortho'</i> -dimethoxyphenyl-BBTT 3j.....                        | 270 |
| 6.2    | <i>anti-anti-N-para</i> -substituted-phenyl-BBTT .....                               | 281 |
| 6.2.1  | <i>anti-anti-N-para</i> -cyanophenyl-BBTT .....                                      | 281 |
| 6.2.2  | <i>anti-anti-N-para</i> -chlorophenyl-BBTT .....                                     | 282 |
| 6.2.3  | <i>anti-anti-N-para</i> -fluorophenyl-BBTT.....                                      | 284 |
| 6.2.4  | <i>anti-anti-N-phenyl</i> -BBTT 5.....                                               | 285 |
| 6.2.5  | <i>anti-anti-N-para</i> -methylphenyl-BBTT .....                                     | 289 |
| 6.2.6  | <i>anti-anti-N-para</i> -methoxyphenyl-BBTT .....                                    | 291 |
| 6.3    | <i>anti-anti-N-ortho(,ortho')</i> -(di)substituted-phenyl-3,9-dibromo-BBTT 4a-d..... | 292 |
| 6.3.1  | <i>anti-anti-N-ortho</i> -methylphenyl-3,9-dibromo-BBTT 4a .....                     | 292 |
| 6.3.2  | <i>anti-anti-N-ortho,ortho'</i> -chloromethoxyphenyl-3,9-dibromo-BBTT 4b.....        | 294 |
| 6.3.3  | <i>anti-anti-N-ortho,ortho'</i> -fluoromethoxyphenyl-3,9-dibromo-BBTT 4c.....        | 297 |
| 6.3.4  | <i>anti-anti-N-ortho,ortho'</i> -dimethoxyphenyl-3,9-dibromo-BBTT 4d.....            | 300 |
| 7      | References.....                                                                      | 304 |



# 1 Synthesis

## 1.1 General Information

### 1.1.1 Synthesis

All reactions were carried out in a dry and oxygen free nitrogen or argon atmosphere using standard Schlenk techniques. Furthermore, all solvents for syntheses (toluene, THF, DMF) were dried and stored under dry and oxygen free nitrogen or argon atmosphere over molecular sieve prior to use. Sodium<sup>tert</sup>butoxide was stored in a glove box of the manufacturer M. Braun under dry and oxygen free argon atmosphere and weight in the reaction vessel directly. Compounds, materials and solvents except the starting materials **1** and **2** and their precursors were purchased from Sigma Aldrich, BLD Pharm, Acros Organics, Alfa Aesar, Merck Millipore, Macherey-Nagel, VWR Chemicals, Carl Roth GmbH and used as received. The flash column chromatography was performed at a pressure of 2 bar under nitrogen on silica gel of size 0.040-0.060 mm. The crude products were adsorbed to Celite 535<sup>®</sup> beforehand. During recrystallization, heating was stopped after the crude product was completely dissolved. By leaving the flask in the silicone oil bath, slow cooling of the solution with the formation of high-quality crystals was ensured. The isolated products were dried for at least 12 h under a fine vacuum ( $10^{-2}$  to  $10^{-3}$  mbar).

### 1.1.2 Characterization

Most of the characterization was carried out by the department CeMSA@HHU of the Heinrich-Heine university. The NMR spectra were recorded on a Bruker Avance III 300 and a Bruker Avance III 600. All  $^1\text{H}$  and  $^{13}\text{C}\{^1\text{H}\}$ , and DEPT-135 NMR spectra are referenced to the chemical shifts of residual undeuterated solvent, mostly in THF- $d_8$ .  $^{19}\text{F}$  NMR spectra were referenced to standard 1,3,5-trifluorobenzene with a chemical shift of  $\delta = -107.67$  ppm in THF- $d_8$ . The mass spectra were measured on a Finnigan MAT TSQ 7000 (EI-MS), Jeol JMS-Q1600 (EI-MS), UHR-QTOF maxis 4G (HR-ESI-MS) or MALDI-TOF Ultraflex (MALDI). EPR spectra were measured with a Miniscope MS 300 from Magnostech GmbH with  $g$ -factors referenced to external  $\text{Mn}^{2+}$  in ZnS ( $g = 2.118, 2.066, 2.027, 1.986, 1.946, 1.906$ ). The settings were as follows: *microwave frequency* = 9.43 GHz, *center field* = 3359 G; *sweep* = 120 G; *modulation amplitude* = 2000 mG; *receiver gain* = 4; *microwave attenuation* = 0 dB; *sweep time* = 90 s. Simulations of the EPR spectrum was performed with EasySpin (v 5.2.25 for Matlab R2020). A Büchi B545 melting point analyser was used to determine the melting and decomposition points. IR spectra were recorded with a Shimadzu IR Affinity-1 spectrometer. Elemental analyses were measured on an Elementar Vario MICRO cube. X-ray analysis of crystals was performed using a Bruker Apex Duo CCD diffractometer with Mo- $K\alpha$  radiation ( $\lambda = 0.7101 \text{ \AA}$ )

or a Rigaku XtaLAB-Synergy S diffractometer with Cu-K $\alpha$  radiation ( $\lambda = 1.54184 \text{ \AA}$ ). Final analysis and image plotting was performed with ORTEP,<sup>1</sup> Mercury<sup>2</sup> and Crystal explorer<sup>3</sup>.

### 1.1.3 Analysis of optoelectronic properties

CVs were measured with a Potentiostat Galvanostat VersaSTAT3 from Princeton Applied Research. Measurements conditions:  $T = 298 \text{ K}$ ,  $0.1 \text{ M [Bu}_4\text{N][PF}_6\text{]}$ ,  $v = 100 \text{ mV/s}$ , Pt-working- und -counter electrode, Ag/AgCl(3 M)-reference electrode, referenced with DMFc/DMFc<sup>+</sup>. Spectroelectrochemistry was recorded in a SEC cell as rhd instruments TSC 1600 closed with a Potentiostat Metrom PGSTAT204, a Hamamatsu L10290 as excitation source and TIDAS S MMS Vis/NIR as spectrometer. Measurements conditions:  $T = 298 \text{ K}$ ,  $0.1 \text{ M [Bu}_4\text{N][PF}_6\text{]}$ ,  $v = 100 \text{ mV/s}$ , Pt-mesh-working- und GC-counter electrode, silver wire pseudo reference electrode. UV/vis absorption measurements were performed in a on a Perkin Elmer Spectrometer Lambda 19, whilst emission data were obtained on a FLS 1000 with a 450 W xenon gas discharge lamp for emission spectra and a pulsed diode laser EPL-450 of wavelength of 448.8 nm by Edinburgh Instruments.

## 1.2 Synthesis of BBTTs

### 1.2.1 Starting materials

The synthesis of the starting material bis(2-bromobenzo[*b*]thiophen-3-yl)sulfane **1** and bis(2,6-dibromobenzo[*b*]thiophen-3-yl)sulfane **2** and their precursors were carried out according to literature.<sup>4, 5</sup>

### 1.2.2 General procedures

#### 1.2.2.1 General procedure I: Buchwald-Hartwig coupling<sup>4</sup>

The synthesis of *anti-anti-N-ortho*-substituted-Phenyl-BBTT **3** is carried out by placing bis(2-bromobenzo[*b*]thiophen-3-yl)sulfane (1.00 equivs), bis(dibenzylideneacetone)palladium, 1,1'-Bis(diphenylphosphino)ferrocene (DPPF) and sodium<sup>tert</sup>butoxide in a Schlenk tube. In addition, the desired *ortho*-aniline (1.00 equivs) and toluene as solvent were added. The components were allowed to react while stirring at 110 °C.

All crude products were purified by flash column chromatography and subsequent recrystallization.

#### 1.2.2.2 General procedure II: Buchwald-Hartwig coupling

The synthesis of *anti-anti-N-ortho,ortho'*-disubstituted-Phenyl-BBTT **3** is carried out by placing bis(2-bromobenzo[*b*]thiophen-3-yl)sulfane (1.00 equivs), bis(dibenzylideneacetone)palladium, 9,9-dimethyl-9*H*-xanthene-4,5-diyl)bis(diphenylphosphine) (Xantphos) and sodium<sup>tert</sup>butoxide

in a Schlenk tube. In addition, the desired *ortho*-aniline (1.00 equivs) and toluene as solvent were added. The components were allowed to react while stirring at 110 °C.

All crude products were purified by flash column chromatography and subsequent recrystallization.

#### 1.2.2.3 General procedure III: Buchwald-Hartwig coupling<sup>5</sup>

The synthesis of *anti-anti-3,9-dibromo-N-ortho(,ortho')*-(di)substituted-Phenyl-BBTT **4** is carried out by placing bis(2-bromobenzo[*b*]thiophen-3-yl)sulfane (1.00 equivs), bis(dibenzylideneacetone)palladium, (±)-2,2'-bis(diphenylphosphino)-1,1'-binaphthalin (BINAP) and sodium<sup>tert</sup>butoxide in a Schlenk tube. In addition, the desired *ortho*-aniline (1.00 equivs) and toluene as solvent were added. The components were allowed to react while stirring at 110 °C.

All crude products were purified by flash column chromatography and often subsequent recrystallization or washing.

#### 1.2.2.4 General procedure IV: Dehalogenation by transmetalation

Synthesis of *anti-anti-N-ortho(,ortho')*-(di)substituted-Phenyl-BBTT **3** was carried out in a Schlenk tube by dissolving the corresponding 3,9-dibrominated BBTT (**4**, 1.00 equivs) with TMEDA (2.40 equivs) in THF. The reaction solution was then stirred at -78°C while a solution of <sup>n</sup>butyllithium (2.40 equivs) in <sup>n</sup>hexane was added. Afterwards the reaction mixture was stirred for 2 h more, before methanol (10.0 equivs) was added and the reaction was finished by stirring at 22°C for another 30 min.

#### 1.2.2.5 General procedure V: Kumada coupling

*Anti-anti-N-ortho,ortho'*-disubstituted-Phenyl-BBTT **3** were synthesized starting from their respective chlorinated BBTT **3** (1.00 eq.) by adding PEPPSI-IPr (5.00 - 15.0 mol%) to THF in a Schlenk tube. The reaction was then carried out at 65°C whilst a solution of methylmagnesium chloride (3.00 M) in THF was added gradually by a syringe pump. After complete addition, stirring was continued for 2 h to complete the reaction. The reaction was terminated by the addition of distilled water (20 mL). It was acidified with HCL solution (1 M, 1 mL), extracted with ethyl acetate (3 x 20-50 mL) and the combined organic phases were dried with anhydrous magnesium sulfate. The crude product was purified by flash column chromatography.

#### 1.2.2.6 General procedure VI: Cyanation

The synthesis of *anti-anti-N-ortho(,ortho')*-(di)substituted-Phenyl-BBTT **3** started from the respective chlorinated BBTT (1.00 eq.). Furthermore, PEPPSI-IPr (2.50 mol%), potassium

hexacyanoferrate(II)trihydrate (0.25-5.00 equivs) and sodium carbonate (2.50-5.00 equivs) were additionally placed with DMF in a Schlenk tube. The reaction mixture was stirred at 160°C while a solution of PEPPSI-IPr (0.1 M) in DMF was added with a drip rate of 100  $\mu\text{l h}^{-1}$  using a syringe pump. After complete addition, stirring was continued for further 8 h to complete the reaction. After cooling to 22°C, the reaction solution was stirred for 0.5 h with a saturated  $\text{FeSO}_4$  solution (10 mL) before the reaction mixture was filtered and the residue was washed with THF (25 mL). The filtrate was extracted with ethyl acetate (3 x 20-50 mL) and the combined organic phases were dried with magnesium sulfate (anhydrous). The crude product was purified by flash column chromatography followed by recrystallization.

### 1.2.3 *Anti-anti-N-ortho*-substituted-Phenyl-BBTT 3a-e

#### 1.2.3.1 2-(6*H*-benzo[4,5]thieno[3,2-*b*]benzo[4,5]thieno[2,3-*e*][1,4]thiazin-6-yl)benzonitrile (3a)<sup>4</sup>

The product was prepared in accordance to general procedure VI.

| <b>6-(2-chlorophenyl)-6<i>H</i>-benzo[4,5]thieno[3,2-<i>b</i>]benzo[4,5]thieno[2,3-<i>e</i>][1,4]thiazine (3c)</b> | <b>PEPPSI-IPr</b>       | <b><math>\text{K}_4[\text{Fe}(\text{CN})_6] \cdot \text{H}_2\text{O}</math></b> | <b><math>\text{Na}_2\text{CO}_3</math></b> | <b>solvent</b> |
|--------------------------------------------------------------------------------------------------------------------|-------------------------|---------------------------------------------------------------------------------|--------------------------------------------|----------------|
| 1.00 mmol                                                                                                          | 2.50 mmol% + 2.50 mmol% | 0.250 mmol                                                                      | 2.5 mmol                                   | 5.00 mL        |
| 422 mg                                                                                                             | 17.0 mg + 17.0 mg       | 106 mg                                                                          | 273 mg                                     | DMF            |

The product was eluted by flash column chromatography with a gradient of *n*-hexane/THF starting at ratio of 20:1 to 10:1 as eluent. Recrystallization was carried out in toluene (20 mL). Yield: red crystals, 211 mg, 0.511 mmol, 51%; Mp.: 236°C°; <sup>1</sup>H NMR (300 MHz, THF-*d*<sub>8</sub>)  $\delta$  7.16 – 7.32 (m, 2H), 7.33 – 7.44 (m, 4H), 7.60 – 7.67 (m, 2H), 7.70 – 7.79 (m, 1H), 7.88 – 8.11 (m, 3H). <sup>13</sup>C-<sup>1</sup>H-NMR (75 MHz, THF-*d*<sub>8</sub>)  $\delta$  101.8 (C<sub>quart.</sub>), 115.9 (C<sub>quart.</sub>), 116.0 (C<sub>quart.</sub>), 120.6 (CH), 123.0 (CH), 124.6 (CH), 126.3 (CH), 131.7 (CH), 132.0 (CH), 134.6 (C<sub>quart.</sub>), 136.1 (CH), 136.1 (CH), 137.1 (C<sub>quart.</sub>), 140.7 (C<sub>quart.</sub>), 145.4 (C<sub>quart.</sub>). EI-MS (*m/z* (%)): 428 ([C<sub>23</sub>H<sub>12</sub>N<sub>2</sub>OS<sub>3</sub>]<sup>+</sup>, 16), 412 ([C<sub>23</sub>H<sub>12</sub>N<sub>2</sub>S<sub>3</sub>]<sup>+</sup>, 93), 380 (43), 310 ([C<sub>16</sub>H<sub>8</sub>NS<sub>3</sub>]<sup>+</sup>, 100), 278 ([C<sub>16</sub>H<sub>8</sub>NS<sub>2</sub>]<sup>+</sup>, 28). Elemental analysis calc. for C<sub>23</sub>H<sub>12</sub>N<sub>2</sub>S<sub>3</sub>: C 66.96, H 2.93, N 6.79, S 23.31; found: C 66.82, H 3.11, N 6.63, S 23.24.

#### 1.2.3.2 6-Phenyl-6*H*-benzo[4,5]thieno[3,2-*b*]benzo[4,5]thieno[2,3-*e*][1,4]thiazine (3b)<sup>4</sup>

The product was prepared in accordance to general procedure I.

| bis(2-bromobenzo[ <i>b</i> ]thiophen-3-yl)sulfane (1) | 2-chloroaniline | Pd(dba) <sub>2</sub> | DPPF      | sodium <sup>tert</sup> butoxide | solvent / reaction time |
|-------------------------------------------------------|-----------------|----------------------|-----------|---------------------------------|-------------------------|
| 5.00 mmol                                             | 5.00 mmol       | 7.50 mol%            | 15.0 mol% | 15.0 mmol                       | 30.0 mL toluene         |
| 2.28 g                                                | 638 mg          | 216 mg               | 416 mg    | 1.44 g                          | 52 h                    |

In addition to that, saturated NaCl solution was added to the reaction mixture, followingly extraction was carried out with dichloromethane (3 x 50 mL) and the combined organic phases were dried with sodium sulfate (anhydrous). The product was eluted by flash column chromatography with a gradient of <sup>n</sup>hexane/triethylamine/THF starting at ratio of 100:3:0 to 100:3:3 as eluent. Recrystallization was carried out in toluene (35 mL). Yield: yellow to brownish crystals, 1.11 g, 2.64 mmol, 53%; Mp.: 180°C°; <sup>1</sup>H NMR (300 MHz, THF-*d*<sub>8</sub>) δ 7.14 – 7.24 (m, 2H), 7.29 – 7.41 (m, 4H), 7.51 – 7.63 (m, 4H), 7.67 – 7.74 (m, 1H), 7.74 – 7.83 (m, 1H). EI-MS (*m/z* (%)): 423 ([C<sub>22</sub>H<sub>12</sub><sup>37</sup>CINS<sub>3</sub>]<sup>+</sup>, 37), 421 ([C<sub>22</sub>H<sub>12</sub><sup>35</sup>CINS<sub>3</sub>]<sup>+</sup>, 93), 386 ([C<sub>22</sub>H<sub>12</sub>CINS<sub>3</sub>]<sup>+</sup>, 34), 310 ([C<sub>16</sub>H<sub>8</sub>NS<sub>3</sub>]<sup>+</sup>, 100), 278 ([C<sub>16</sub>H<sub>8</sub>NS<sub>2</sub>]<sup>+</sup>, 17).

### 1.2.3.3 6-(2-Fluorophenyl)-6*H*-benzo[4,5]thieno[3,2-*b*]benzo[4,5]thieno[2,3-*e*][1,4]thiazine (3c)

The product was prepared in accordance to general procedure I.

| bis(2-bromobenzo[ <i>b</i> ]thiophen-3-yl)sulfane (1) | 2-fluoroaniline | Pd(dba) <sub>2</sub> | DPPF      | sodium <sup>tert</sup> butoxide | solvent / reaction time |
|-------------------------------------------------------|-----------------|----------------------|-----------|---------------------------------|-------------------------|
| 0.500 mmol                                            | 0.500 mmol      | 7.50 mol%            | 15.0 mol% | 15.0 mmol                       | 3.00 mL toluene         |
| 228 mg                                                | 48.3 μL         | 21.6 mg              | 41.6 mg   | 144 mg                          | 24 h                    |

In addition to that, saturated NaCl solution was added to the reaction mixture, followingly extraction was carried out with dichloromethane (3 x 100 mL) and the combined organic phases were dried with magnesium sulfate (anhydrous). The product was eluted by flash column chromatography with a <sup>n</sup>hexane/triethylamine at ratio of 100:2 as eluent. Recrystallization was carried out in <sup>n</sup>hexane (60 mL). Yield: yellow needles, 135 mg, 0.33 mmol, 67%; Mp.: 182°C°; <sup>1</sup>H NMR (300 MHz, THF-*d*<sub>8</sub>) δ 7.17 – 7.24 (m, 2H), 7.31 – 7.47 (m, 6H), 7.57 – 7.66 (m, 2H), 7.72 – 7.79 (m, 1H). <sup>13</sup>C-{<sup>1</sup>H}-NMR (151 MHz, THF-*d*<sub>8</sub>) δ 100.2 (C<sub>quart</sub>), 118.8 (CH, d, <sup>2</sup>J<sub>CF</sub> = 19.4 Hz), 120.3 (CH), 122.9 (CH), 124.3 (CH), 126.2 (CH), 126.9 (CH, d, <sup>3</sup>J<sub>CF</sub> = 4.2 Hz), 130.7 (C<sub>quart</sub>, d, <sup>2</sup>J<sub>CF</sub> = 12.2 Hz), 132.7 (CH), 133.3 (CH, d, <sup>3</sup>J<sub>CF</sub> = 8.1 Hz), 134.4 (C<sub>quart</sub>), 137.3 (C<sub>quart</sub>), 141.6 (C<sub>quart</sub>), 160.9 (C<sub>quart</sub>, d, <sup>1</sup>J<sub>CF</sub> = 253.6 Hz). <sup>19</sup>F-NMR (282 MHz, THF-

$d_8$ )  $\delta$  -119.50. HR-ESI-MS calc. for  $[C_{22}H_{12}FNS_3]^+$ : 405.0110; found: 405.0119. IR:  $\tilde{\nu}$  [ $cm^{-1}$ ] = 3051 (w), 3026 (w), 1589 (w), 1568 (m), 1547 (w), 1504 (m), 1489 (m), 1456 (m), 1435 (s), 1350 (w), 1288 (m), 1275 (m), 1261 (m), 1240 (m), 1215 (w), 1204 (w), 1167 (w), 1157 (w), 1130 (w), 1105 (m), 1065 (w), 1015 (m), 953 (w), 925 (w), 865 (w), 850 (w), 826 (w), 772 (m), 758 (w), 745 (s), 719 (s), 712 (m), 687 (m). Elemental analysis calc. for  $C_{22}H_{12}FNS_3$ : C 65.16, H 2.98, N 3.45, S 23.72; found: C 64.88, H 3.03, N 3.50, S 23.52.

#### 1.2.3.4 6-(*o*-Tolyl)-6*H*-benzo[4,5]thieno[3,2-*b*]benzo[4,5]thieno[2,3-*e*][1,4]thiazine (3d)

The product was prepared in accordance to general procedure IV.

| <b>3,9-dibromo-6-(<i>o</i>-tolyl)-6<i>H</i>-benzo[4,5]thieno[3,2-<i>b</i>]benzo[4,5]thieno[2,3-<i>e</i>][1,4]thiazine (4a)</b> | <b>TMEDA</b> | <b><sup>n</sup>butyllithium (1.60 M)</b> | <b>methanol</b> | <b>solvent</b> |
|--------------------------------------------------------------------------------------------------------------------------------|--------------|------------------------------------------|-----------------|----------------|
| 0.372 mmol                                                                                                                     | 0.892 mmol   | 0.892 mmol                               | 3.72 mmol       | 1.50 mL        |
| 208 mg                                                                                                                         | 104 mg       | 558 $\mu$ l                              | 152 $\mu$ l     | THF            |

In addition to that, distilled water was added to the reaction mixture. The followingly extraction was carried out with dichloromethane (3 x 20 mL) and the combined organic phases were dried with magnesium sulfate (anhydrous). After repeated washing with <sup>n</sup>pentane (10 mL) while ultrasonification the product was isolated. Yield: orange powder, 99.2 mg, 0.247 mmol, 66 %; Mp.: 167°C°; <sup>1</sup>H NMR (300 MHz, THF- $d_8$ )  $\delta$  2.48 (s, 3H), 7.14 – 7.22 (m, 2H), 7.28 – 7.51 (m, 8H), 7.53 – 7.60 (m, 2H). <sup>13</sup>C-<sup>1</sup>H-NMR (75 MHz, THF- $d_8$ )  $\delta$  17.8 (CH<sub>3</sub>), 98.8 (C<sub>quart</sub>), 120.1 (CH), 122.8 (CH), 123.9 (CH), 126.1 (CH), 129.1 (CH), 130.8 (CH), 131.4 (CH), 133.3 (CH), 134.5 (C<sub>quart</sub>), 137.5 (C<sub>quart</sub>), 139.4 (C<sub>quart</sub>), 141.8 (C<sub>quart</sub>), 142.0 (C<sub>quart</sub>). EI-MS ( $m/z$  (%)): 401.0 ( $[C_{23}H_{15}NS_3]^+$ , 34), 310.0 ( $[C_{16}H_8NS_3]^+$ , 29), 296.0 ( $[C_{16}H_8S_3]^+$ , 100), 148.0 ( $[C_8H_7NS]^+$ , 20). IR:  $\tilde{\nu}$  [ $cm^{-1}$ ] = 1562 (m), 1545 (w), 1506 (s), 1452 (m), 1431 (s), 1286 (m), 1267 (m), 1244 (m), 1198 (m), 1169 (w), 1155 (w), 1113 (w), 1063 (m), 1015 (m), 955 (w), 945 (w), 857 (w), 818 (w), 745 (s), 735 (s), 728 (s), 719 (s), 689 (m), 648 (w). Elemental analysis calc. for  $C_{23}H_{15}NS_3$ : C 68.79, H 3.77, N 3.49, S 23.95; found: C 68.76, H 4.01, N 3.44, S 23.89.

1.2.3.5 6-(2-Methoxyphenyl)-6H-benzo[4,5]thieno[3,2-b]benzo[4,5]thieno[2,3-e][1,4]thiazine  
(3e)

The product was prepared in accordance to general procedure I.

| bis(2-bromobenzo[ <i>b</i> ]thiophen-3-yl)sulfane (1) | 2-Anisidine | Pd(dba) <sub>2</sub> | DPPF      | sodium <sup>tert</sup> butoxide | solvent / reaction time |
|-------------------------------------------------------|-------------|----------------------|-----------|---------------------------------|-------------------------|
| 0.500 mmol                                            | 0.500 mmol  | 7.50 mol%            | 15.0 mol% | 15.0 mmol                       | 3.00 mL toluene         |
| 228 mg                                                | 56.5 μL     | 21.6 mg              | 41.6 mg   | 144 mg                          | 24 h                    |

In addition to that, saturated NaCl solution was added to the reaction mixture, followingly extraction was carried out with dichloromethane (3 x 100 mL) and the combined organic phases were dried with magnesium sulfate (anhydrous). The product was eluted by flash column chromatography with a gradient of <sup>n</sup>hexane/dichloromethane/triethylamine starting at ratio of 100:1:2 to 100:5:2 as eluent. Recrystallization was carried out in ethanol (25 mL). Yield: yellow crystals, 45.6 mg, 0.11 mmol, 22%; Mp.: 140°C°; <sup>1</sup>H NMR (300 MHz, THF-*d*<sub>8</sub>) δ 3.82 (s, 3H), 7.09 – 7.17 (m, 3H), 7.23 – 7.28 (m, 3H), 7.32 – 7.35 (m, 2H), 7.52 – 7.57 (m, 4H). <sup>13</sup>C-<sup>{1</sup>H}-NMR (151 MHz, THF-*d*<sub>8</sub>) δ 56.3 (CH<sub>3</sub>), 98.4 (C<sub>quart</sub>), 114.3 (CH), 120.0 (CH), 122.2 (CH), 122.7 (CH), 123.6 (CH), 125.9 (CH), 131.1 (C<sub>quart</sub>), 132.2 (CH), 132.7 (CH), 134.3 (C<sub>quart</sub>), 137.6 (C<sub>quart</sub>), 142.8 (C<sub>quart</sub>), 158.3(C<sub>quart</sub>). HR-ESI-MS calc. for [C<sub>23</sub>H<sub>15</sub>NOS<sub>3</sub>]<sup>+</sup>: 417.0310; found: 417.0312. IR:  $\tilde{\nu}$  [cm<sup>-1</sup>] = 3061 (w), 3026 (w), 2967 (w), 2938 (m), 2835 (w), 1595 (w), 1568 (w), 1555 (w), 1508 (s), 1493 (m), 1468 (w), 1456 (m), 1433 (s), 1346 (w), 1304 (w), 1297 (s), 1275 (w), 1260 (w), 1242 (m), 1182 (w), 1167 (w), 1155 (w), 1117 (w), 1063 (w), 1043 (m), 1022 (m), 993 (w), 951 (w), 904 (w), 850 (w), 836 (w), 810 (w), 754 (s), 737 (s), 722 (m), 712 (s), 691 (m), 645 (w). Elemental analysis calc. for C<sub>23</sub>H<sub>15</sub>NOS<sub>3</sub>: C 66.16, H 3.62, N 3.35, S 23.03; found: C 65.93, H 3.47, N 3.32, S 22.93.

## 1.2.4 Anti-anti-N-ortho,ortho'-disubstituted-Phenyl-BBTT 3f-t

### 1.2.4.1 2-(6H-benzo[4,5]thieno[3,2-b]benzo[4,5]thieno[2,3-e][1,4]thiazine-6-yl)isophthalonitrile (3f)

The product was prepared in accordance to general procedure VI.

| 6-(2,6-dichlorophenyl)-6H-benzo[4,5]thieno[3,2-b]benzo[4,5]thieno[2,3-e][1,4]thiazine (3g) | PEPPSI-IPr             | K <sub>4</sub> [Fe(CN) <sub>6</sub> ] · H <sub>2</sub> O | Na <sub>2</sub> CO <sub>3</sub> | solvent |
|--------------------------------------------------------------------------------------------|------------------------|----------------------------------------------------------|---------------------------------|---------|
| 1.00 mmol                                                                                  | 2.50 mmol% + 7.5 mmol% | 0.500 mmol                                               | 5.00 mmol                       | 5.00 mL |
| 456 mg                                                                                     | 17.0 mg + 50.9 mg      | 211 mg                                                   | 545 mg                          | DMF     |

The product was eluted by flash column chromatography with a gradient of *n*hexane/THF starting at ratio of 5:1 to 5:3 as eluent. Recrystallization was carried out in toluene (20 mL). Yield: black, red and orange crystals, 201 mg, 0.458 mmol, 46%; Mp.: 302-303°C°; <sup>1</sup>H NMR (300 MHz, THF-*d*<sub>6</sub>) δ 7.23 – 7.36 (m, 2H), 7.37 – 7.49 (m, 4H), 7.67 (d, <sup>3</sup>J<sub>HH</sub> = 8.05 Hz, 2H), 7.97 (t, <sup>3</sup>J<sub>HH</sub> = 7.90 Hz, 1H), 8.36 (d, <sup>3</sup>J<sub>HH</sub> = 7.90 Hz, 2H). <sup>13</sup>C-{<sup>1</sup>H}-NMR (75 MHz, THF-*d*<sub>6</sub>) δ 103.3 (C<sub>quart.</sub>), 114.6 (C<sub>quart.</sub>), 118.3 (C<sub>quart.</sub>), 121.1 (CH), 123.2 (CH), 125.2 (CH), 126.5 (CH), 133.0 (CH), 134.6 (C<sub>quart.</sub>), 137.0 (C<sub>quart.</sub>), 138.2 (C<sub>quart.</sub>), 140.3 (CH), 170.6 (C<sub>quart.</sub>). EI-MS (*m/z* (%)): 437 ([C<sub>24</sub>H<sub>11</sub>N<sub>3</sub>S<sub>3</sub>]<sup>+</sup>, 71), 310 ([C<sub>16</sub>H<sub>8</sub>NS<sub>3</sub>]<sup>+</sup>, 100), 278 ([C<sub>16</sub>H<sub>8</sub>NS<sub>2</sub>]<sup>+</sup>, 16). Elemental analysis calc. for C<sub>24</sub>H<sub>11</sub>N<sub>3</sub>S<sub>3</sub>: C 65.88, H 2.53, N 9.60, S 21.98; found: C 65.93, H 2.65, N 9.45, S 21.67.

### 1.2.4.2 2-(6H-benzo[4,5]thieno[3,2-b]benzo[4,5]thieno[2,3-e][1,4]thiazin-6-yl)-3-chlorobenzonitrile (3k)

The product was prepared in accordance to general procedure VI.

| 6-(2,6-dichlorophenyl)-6H-benzo[4,5]thieno[3,2-b]benzo[4,5]thieno[2,3-e][1,4]thiazine (3g) | PEPPSI-IPr              | K <sub>4</sub> [Fe(CN) <sub>6</sub> ] · H <sub>2</sub> O | Na <sub>2</sub> CO <sub>3</sub> | solvent |
|--------------------------------------------------------------------------------------------|-------------------------|----------------------------------------------------------|---------------------------------|---------|
| 1.00 mmol                                                                                  | 2.50 mmol% + 17.5 mmol% | 5.00 mmol                                                | 5.00 mmol                       | 5.00 mL |
| 456 mg                                                                                     | 17.0 mg + 119 mg        | 2.11 g                                                   | 545 mg                          | DMF     |

Because general procedure VI led mostly to the formation of **3f**, the intermediate **3k** could not be isolated. Accordingly, the catalyst loading was increased as well as the reaction time after



completion of the catalyst addition reduced. Therefore, the reaction mixture was stirred for 1 h after the addition. The product was eluted by flash column chromatography with a gradient of *n*-hexane/THF starting at ratio of 20:1 to 5:4 as eluent. Recrystallization was carried out in toluene (15 mL). Yield: dark red, 73.1 mg, 0.164 mmol, 16%; Mp.: 295-296°C°; <sup>1</sup>H NMR (300 MHz, THF-*d*<sub>8</sub>) δ 7.21 – 7.29 (m, 2H), 7.34 – 7.45 (m, 4H), 7.61 – 7.67 (m, 2H), 7.79 (t, <sup>3</sup>J<sub>HH</sub> = 8.00 Hz, 1H), 7.99 – 8.09 (m, 2H). <sup>13</sup>C-<sup>1</sup>H-NMR (75 MHz, THF-*d*<sub>8</sub>) δ 101.5 (C<sub>quart.</sub>), 115.3 (C<sub>quart.</sub>), 119.0 (C<sub>quart.</sub>), 120.7 (CH), 123.1 (CH), 124.7 (CH), 126.4 (CH), 133.5 (CH), 134.4 (CH), 134.6 (CH), 137.2 (C<sub>quart.</sub>), 137.4 (C<sub>quart.</sub>), 138.2 (C<sub>quart.</sub>), 138.8 (C<sub>quart.</sub>), 141.6 (C<sub>quart.</sub>). EI-MS (*m/z* (%)): 464 ([C<sub>23</sub>H<sub>11</sub><sup>37</sup>CIN<sub>2</sub>S<sub>3</sub>O]<sup>+</sup>, 4), 462 ([C<sub>23</sub>H<sub>11</sub><sup>35</sup>CIN<sub>2</sub>S<sub>3</sub>O]<sup>+</sup>, 9), 447 ([C<sub>23</sub>H<sub>11</sub><sup>37</sup>CIN<sub>2</sub>S<sub>3</sub>]<sup>+</sup>, 20), 445 ([C<sub>23</sub>H<sub>11</sub><sup>35</sup>CIN<sub>2</sub>S<sub>3</sub>]<sup>+</sup>, 7), 416 (8), 414 (20), 412 (9), 399 (12), 310 ([C<sub>16</sub>H<sub>8</sub>NS<sub>3</sub>]<sup>+</sup>, 100), 278 ([C<sub>16</sub>H<sub>8</sub>NS<sub>2</sub>]<sup>+</sup>, 22), 123 (16). IR:  $\tilde{\nu}$  [cm<sup>-1</sup>] = 2233 (w), 1576 (w), 1560 (w), 1522 (m), 1456 (w), 1444 (m), 1433 (m), 1279 (m), 1238 (m), 1180 (w), 1151 (w), 1057 (w), 1020 (w), 953 (w), 850 (w), 795 (m), 756 (s), 719 (s), 681 (w). Elemental analysis calc. for C<sub>23</sub>H<sub>11</sub>CIN<sub>2</sub>S<sub>3</sub>: C 61.80, H 2.48, N 6.27, S 21.52; found: C 62.02, H 2.74, N 6.14, S 21.46.

#### 1.2.4.3 2-(6*H*-benzo[4,5]thieno[3,2-*b*]benzo[4,5]thieno[2,3-*e*][1,4]thiazine-6-yl)-3-fluorobenzonitrile (3l)

The product was prepared in accordance to general procedure VI.

| 6-(2-chloro-6-fluorophenyl)-6 <i>H</i> -benzo[4,5]thieno[3,2- <i>b</i> ]benzo[4,5]thieno[2,3- <i>e</i> ][1,4]thiazin (3o) | PEPPSI-IPr              | K <sub>4</sub> [Fe(CN) <sub>6</sub> ] · H <sub>2</sub> O | Na <sub>2</sub> CO <sub>3</sub> | solvent |
|---------------------------------------------------------------------------------------------------------------------------|-------------------------|----------------------------------------------------------|---------------------------------|---------|
| 1.00 mmol                                                                                                                 | 2.50 mmol% + 2.50 mmol% | 0.250 mmol                                               | 2.50 mmol                       | 5.00 mL |
| 440 mg                                                                                                                    | 17.0 mg + 17.0 mg       | 105.5 mg                                                 | 265 mg                          | DMF     |

The product was eluted by flash column chromatography with a gradient of *n*-hexane/THF starting at ratio of 20:1 to 5:1 as eluent. Recrystallization was carried out in toluene (10 mL). Yield: brownish crystals, 197 mg, 0.458 mmol, 46 %; Mp.: 260-264°C°; <sup>1</sup>H NMR (300 MHz, THF-*d*<sub>8</sub>) δ 7.21 – 7.32 (m, 2H), 7.37 – 7.46 (m, 4H), 7.63 – 7.70 (m, 2H), 7.77 – 7.92 (m, 3H). <sup>13</sup>C-<sup>1</sup>H-NMR (75 MHz, THF-*d*<sub>8</sub>) δ 102.0 (C<sub>quart.</sub>), 115.0 (C<sub>quart.</sub>, d, <sup>3</sup>J<sub>CF</sub> = 4.3 Hz), 118.2 (CH, d, <sup>4</sup>J<sub>CF</sub> = 1.4 Hz), 120.8 (CH), 123.1 (CH), 124.0 (CH, d, <sup>2</sup>J<sub>CF</sub> = 20.0 Hz), 124.9 (CH), 126.4 (CH), 131.7 (CH, d, <sup>3</sup>J<sub>CF</sub> = 3.9 Hz), 132.5 (C<sub>quart.</sub>, d, <sup>2</sup>J<sub>CF</sub> = 15.1 Hz), 134.4 (C<sub>quart.</sub>), 134.5 (C<sub>quart.</sub>), 137.1 (C<sub>quart.</sub>), 139.5 (C<sub>quart.</sub>), 161.7 (C<sub>quart.</sub>, d, <sup>1</sup>J<sub>CF</sub> = 256.6 Hz). <sup>19</sup>F-NMR (282 MHz, THF) δ -117.5. EI-MS (*m/z* (%)): 446 ([C<sub>23</sub>H<sub>11</sub>FN<sub>2</sub>S<sub>3</sub>O]<sup>+</sup>, 5), 430 ([C<sub>23</sub>H<sub>11</sub>FN<sub>2</sub>S<sub>3</sub>]<sup>+</sup>, 100), 398 ([C<sub>22</sub>H<sub>10</sub>N<sub>2</sub>S<sub>3</sub>]<sup>+</sup>, 10), 310 ([C<sub>16</sub>H<sub>8</sub>NS<sub>3</sub>]<sup>+</sup>, 94), 278 ([C<sub>16</sub>H<sub>8</sub>NS<sub>2</sub>]<sup>+</sup>, 20), 215 (20). IR:  $\tilde{\nu}$  [cm<sup>-1</sup>] = 2237 (w), 1573 (m), 1521 (m), 1470 (m), 1456 (m), 1433 (s), 1279 (s), 1257 (m), 1238 (s), 1155 (w), 1063 (w),

1016 (w), 957 (m), 802 (s), 772 (w), 745 (s), 721 (m). Elemental analysis calc. for C<sub>23</sub>H<sub>11</sub>FN<sub>2</sub>S<sub>3</sub>: C 64.17, H 2.58, N 6.51, S 22.34; found: C 64.24, H 2.58, N 6.47, S 22.44.

1.2.4.4 2-(6*H*-benzo[4,5]thieno[3,2-*b*]benzo[4,5]thieno[2,3-*e*][1,4]thiazine-6-yl)-3-methylbenzonitrile (3m)

The product was prepared in accordance to general procedure VI.

| 6-(2-chloro-6-methylphenyl)-6 <i>H</i> -benzo[4,5]thieno-[3,2- <i>b</i> ]benzo[4,5]thieno[2,3- <i>e</i> ][1,4]thiazin (3p) | PEPPSI-IPr              | K <sub>4</sub> [Fe(CN) <sub>6</sub> ] · H <sub>2</sub> O | Na <sub>2</sub> CO <sub>3</sub> | solvent |
|----------------------------------------------------------------------------------------------------------------------------|-------------------------|----------------------------------------------------------|---------------------------------|---------|
| 1.38 mmol                                                                                                                  | 2.50 mmol% + 2.50 mmol% | 0.344 mmol + 0.344 mmol                                  | 2.50 mmol                       | 7.00 mL |
| 600 mg                                                                                                                     | 23.4 mg + 23.4 mg       | 145 mg                                                   | 366 mg                          | DMF     |

After the reaction was not completed by the parameters according to the method described in the general procedure VI, potassium hexacyanoferrate(II) trihydrate (145 mg, 0.344 mmol, 0.250 equivs) was added again and the reaction mixture was stirred further for 5 h at 185°C. The product was eluted by flash column chromatography with a gradient of <sup>n</sup>hexane/THF starting at ratio of 20:1 to 10:1 as eluent. Recrystallization was carried out in toluene (15 mL). Yield: yellow crystals, 112 mg, 0.262 mmol, 19% Mp.: 307°C°; <sup>1</sup>H NMR (300 MHz, THF-*d*<sub>8</sub>) δ 2.54 (s, 3H), 7.19 – 7.27 (m, 2H), 7.31 – 7.44 (m, 4H), 7.59 – 7.64 (m, 2H), 7.67 (t, <sup>3</sup>J<sub>HH</sub> = 7.74 Hz, 1H), 7.76 – 7.90 (m, 2H). <sup>13</sup>C-{<sup>1</sup>H}-NMR (75 MHz, THF-*d*<sub>8</sub>) δ 17.8 (CH<sub>3</sub>), 100.1 (C<sub>quart.</sub>), 116.2 (C<sub>quart.</sub>), 117.0 (C<sub>quart.</sub>), 120.5 (CH), 123.0 (CH), 124.5 (CH), 126.3 (CH), 132.1 (CH), 133.7 (C<sub>quart.</sub>), 134.3 (CH), 137.4 (C<sub>quart.</sub>), 138.0 (CH), 139.5 (C<sub>quart.</sub>), 142.2 (C<sub>quart.</sub>), 142.8 (C<sub>quart.</sub>). HR-ESI-MS calc. for [C<sub>24</sub>H<sub>14</sub>NS<sub>3</sub>]<sup>+</sup>: 426.0319; found: 426.0316. IR:  $\tilde{\nu}$  [cm<sup>-1</sup>] = 2229 (w), 1570 (m), 1518 (m), 1456 (m), 1433 (s), 1377 (w), 1281 (m), 1234 (m), 1157 (w), 1060 (w), 1016 (w), 953 (w), 941 (w), 914 (w), 797 (m), 756 (s), 743 (s), 719 (s), 687 (w). Elemental analysis calc. for C<sub>24</sub>H<sub>14</sub>NS<sub>3</sub>: C 67.58, H 3.31, N 6.57, S 22.55; found: C 67.89, H 3.36, N 6.43, S 22.29.

1.2.4.5 2-(6*H*-benzo[4,5]thieno[3,2-*b*]benzo[4,5]thieno[2,3-*e*][1,4]thiazin-6-yl)-3-methoxybenzotrile (3n)

The product was prepared in accordance to general procedure VI.

| <b>6-(2-chloro-6-methoxyphenyl)-6<i>H</i>-benzo[4,5]thieno-[3,2-<i>b</i>]benzo[4,5]thieno[2,3-<i>e</i>][1,4]thiazine (3q)</b> | <b>PEPPSI-IPr</b>       | <b>K<sub>4</sub>[Fe(CN)<sub>6</sub>] · H<sub>2</sub>O</b> | <b>Na<sub>2</sub>CO<sub>3</sub></b> | <b>solvent</b> |
|-------------------------------------------------------------------------------------------------------------------------------|-------------------------|-----------------------------------------------------------|-------------------------------------|----------------|
| 0.500 mmol                                                                                                                    | 5.00 mmol% + 10.0 mmol% | 0.125 mmol                                                | 2.50 mmol                           | 3.50 mL        |
| 226 mg                                                                                                                        | 16.9 mg + 33.9 mg       | 52.8 mg                                                   | 265 mg                              | DMF            |

The product was eluted by a doubly flash column chromatography with first <sup>n</sup>hexane/THF in a ratio of 33:1 and second <sup>n</sup>hexane/dichloromethane in a ratio of 10:1 as eluent. Yield: orange powder, 21.6 mg, 0.049 mmol, 1%; Mp.: 292°C; <sup>1</sup>H NMR (300 MHz, THF-*d*<sub>8</sub>) δ 3.88 (s, 3H), 7.21 (ddd, <sup>3</sup>*J*<sub>HH</sub> = 8.3, <sup>3</sup>*J*<sub>HH</sub> = 6.7, <sup>4</sup>*J*<sub>HH</sub> = 1.7 Hz, 2H), 7.30 – 7.42 (m, 4H), 7.54 (dd, <sup>3</sup>*J*<sub>HH</sub> = 7.6, <sup>4</sup>*J*<sub>HH</sub> = 1.4 Hz, 1H), 7.57 – 7.64 (m, 3H), 7.73 (dd, <sup>3</sup>*J*<sub>HH</sub> = 8.6, <sup>3</sup>*J*<sub>HH</sub> = 7.6 Hz, 1H). <sup>13</sup>C-{<sup>1</sup>H}-NMR (75 MHz, THF-*d*<sub>8</sub>) δ 57.2 (CH<sub>3</sub>) 99.8 (C<sub>quart.</sub>), 115.9 (C<sub>quart.</sub>), 117.4 (C<sub>quart.</sub>), 119.6 (C<sub>quart.</sub>), 120.3 (CH), 122.9 (CH), 124.3 (CH), 126.1 (CH), 126.3 (CH), 132.0 (CH), 133.9 (CH), 134.1 (C<sub>quart.</sub>), 137.3 (C<sub>quart.</sub>), 140.7 (C<sub>quart.</sub>), 159.3 (C<sub>quart.</sub>). HPLC (99%) and HR-ESI-MS calc. for [C<sub>24</sub>H<sub>14</sub>N<sub>2</sub>OS<sub>3</sub>]<sup>+</sup>: 442.0268; found: 442.0265. IR:  $\tilde{\nu}$  [cm<sup>-1</sup>] = 2955 (w), 2922 (w), 2851 (w), 1620 (w), 1602 (w), 1599 (w), 1524 (m), 1472 (m), 1456 (w), 1433 (m), 1279 (m), 1260 (m), 1238 (m), 1184 (w), 1159 (w), 1072 (m), 1016 (w), 961 (w), 955 (w), 907 (w), 797 (m), 778 (m), 746 (s), 721 (m), 694 (w), 617 (w).

1.2.4.6 6-(2,6-Chlorophenyl)-6*H*-benzo[4,5]thieno[3,2-*b*]benzo[4,5]thieno[2,3-*e*][1,4]thiazine (3g)

The product was prepared in accordance to general procedure II.

| <b>bis(2-bromobenzo[<i>b</i>]thiophen-3-yl)sulfane (1)</b> | <b>2,6-dichloroaniline</b> | <b>Pd(dba)<sub>2</sub></b> | <b>Xantphos</b> | <b>sodium<sup>tert</sup>butoxide</b> | <b>solvent / reaction time</b> |
|------------------------------------------------------------|----------------------------|----------------------------|-----------------|--------------------------------------|--------------------------------|
| 2.50 mmol                                                  | 2.50 mmol                  | 7.50 mol%                  | 15.0 mol%       | 7.5 mmol                             | 45 mL toluene                  |
| 1.14 mg                                                    | 405 mg                     | 108 mg                     | 208 mg          | 720 mg                               | 46 h                           |

In addition to that, saturated NaCl solution was added to the reaction mixture, followingly extraction was carried out with dichloromethane (3 x 75 mL) and the combined organic phases

were dried with magnesium sulfate (anhydrous). The product was eluted by flash column chromatography with a gradient of *n*-hexane/toluene/THF/triethylamine starting at ratio of 100:2:0:2 to 100:2:10:2 as eluent. Recrystallization was carried out in a mixture of *n*-hexane and ethanol (50 mL, ratio of 50:50). Yield: brownish crystals, 519 mg, 1.14 mmol, 46%; Mp.: 301°C°; <sup>1</sup>H NMR (300 MHz, THF-*d*<sub>8</sub>) δ 7.19 – 7.25 (m, 2H), 7.31 – 7.36 (m, 2H), 7.36 – 7.41 (m, 2H), 7.59 (t, <sup>3</sup>*J*<sub>HH</sub> = 8.10 Hz, 1H), 7.61 (d, <sup>3</sup>*J*<sub>HH</sub> = 7.98 Hz, 2H), 7.67 – 7.72 (m, 2H). <sup>13</sup>C-<sup>1</sup>H-NMR (75 MHz, THF-*d*<sub>8</sub>) δ 99.9 (C<sub>quart</sub>), 120.4 (CH), 123.0 (CH), 124.3 (CH), 126.2 (CH), 131.1 (CH), 133.4 (CH), 134.2 (C<sub>quart</sub>), 137.3 (C<sub>quart</sub>), 137.4 (C<sub>quart</sub>), 138.7 (C<sub>quart</sub>), 139.3 (C<sub>quart</sub>). HR-ESI-MS calc. for [C<sub>22</sub>H<sub>11</sub>Cl<sub>2</sub>NS<sub>3</sub>]<sup>+</sup>: 454.9425; found: 454.9426. IR:  $\tilde{\nu}$  [cm<sup>-1</sup>] = 3065 (w), 2160 (w), 1576 (m), 1518 (s), 1447 (m), 1437 (s), 1344 (w), 1285 (s), 1271 (m), 1242 (s), 1192 (m), 1159 (m), 1115 (w), 1074 (m), 1061 (m), 1020 (m), 839 (m), 781 (s), 768 (m), 743 (s), 718 (s). Elemental analysis calc. for C<sub>22</sub>H<sub>11</sub>Cl<sub>2</sub>NS<sub>3</sub>: C 57.89, H 2.43, N 3.07, S 21.07; found: C 57.90, H 2.48, N 2.99, S 21.07.

#### 1.2.4.7 6-(2-Chloro-6-fluorophenyl)-6H-benzo[4,5]thieno[3,2-*b*]benzo[4,5]thieno[2,3-*e*][1,4]thiazine (3o)

The product was prepared in accordance to general procedure II.

| bis(2-bromobenzo[ <i>b</i> ]thiophen-3-yl)sulfane (1) | 2-chloro, 6-fluoroanilin | Pd(dba) <sub>2</sub> | Xantphos  | sodium <sup>tert</sup> butoxide | solvent / reaction time |
|-------------------------------------------------------|--------------------------|----------------------|-----------|---------------------------------|-------------------------|
| 10.0 mmol                                             | 10.0 mmol                | 5.0 mol%             | 10.0 mol% | 30.0 mmol                       | 180 mL toluene          |
| 4.56 g                                                | 1.47 g                   | 288 mg               | 576 mg    | 2.88 g                          | 56 h                    |

In addition to that, saturated NaCl solution was added to the reaction mixture, followingly extraction was carried out with ethylacetate (3 x 100 mL) and 1,2-Dichloroethane (100 mL) and the combined organic phases were dried with magnesium sulfate (anhydrous). The product was eluted by flash column chromatography with a gradient of *n*-hexane/ethylacetate starting at ratio of 100:0 to 100:2 as eluent. Recrystallization was carried out in toluene (50 mL). Yield: brownish crystals, 3.43 g, 7.80 mmol, 78%; Mp.: 245°C°; <sup>1</sup>H NMR (300 MHz, THF-*d*<sub>8</sub>) δ 7.18 – 7.26 (m, 2H), 7.32 – 7.48 (m, 5H), 7.53 – 7.68 (m, 4H). <sup>13</sup>C-<sup>1</sup>H-NMR (75 MHz, THF-*d*<sub>8</sub>) δ 100.3 (C<sub>quart</sub>), 117.3 (CH, d, <sup>2</sup>*J*<sub>CF</sub> = 20.4 Hz), 120.5 (CH), 123.0 (CH), 124.4 (CH), 126.2 (CH), 127.9 (C<sub>quart</sub>, d, <sup>3</sup>*J*<sub>CF</sub> = 3.6 Hz), 128.5 (C<sub>quart</sub>, d, <sup>2</sup>*J*<sub>CF</sub> = 15.1 Hz), 133.7 (CH, d, <sup>3</sup>*J*<sub>CF</sub> = 9.3 Hz), 134.2 (CH), 137.3 (C<sub>quart</sub>), 138.1 (C<sub>quart</sub>), 140.0 (C<sub>quart</sub>), 162.5 (C<sub>quart</sub>, d, <sup>1</sup>*J*<sub>CF</sub> = 255.8 Hz). <sup>19</sup>F-NMR (282 MHz, THF) δ -116.0. EI-MS (*m/z* (%)): 441.0 ([C<sub>22</sub>H<sub>11</sub><sup>37</sup>ClFNS<sub>3</sub>]<sup>+</sup>, 27), 439.0 ([C<sub>22</sub>H<sub>11</sub><sup>35</sup>ClFNS<sub>3</sub>]<sup>+</sup>, 59), 403.9 ([C<sub>22</sub>H<sub>11</sub>FNS<sub>3</sub>]<sup>+</sup>, 2), 363.0 ([C<sub>16</sub>H<sub>7</sub><sup>37</sup>ClFNS<sub>3</sub>]<sup>+</sup>, 5), 310.0 ([C<sub>18</sub>H<sub>8</sub>NS<sub>3</sub>]<sup>+</sup>, 100), 278.0 ([C<sub>16</sub>H<sub>8</sub>NS<sub>2</sub>]<sup>+</sup>, 19), 219.5 (17). IR:  $\tilde{\nu}$  [cm<sup>-1</sup>] = 3076 (w), 2963 (w),

1589 (w), 1571 (w), 1518 (m), 1454 (m), 1433 (m), 1344 (w), 1269 (m), 1238 (m), 1180 (w), 1151 (w), 1109 (w), 1065 (w), 1020 (w), 951 (w), 901 (m), 839 (w), 789 (s), 743 (s), 716 (s), 683 (w). Elemental analysis calc. for C<sub>22</sub>H<sub>11</sub>ClFNS<sub>3</sub>: C 60.06, H 2.52, N 3.18, S 21.86; found: C 60.33, H 2.64, N 3.16, S 22.82.

1.2.4.8 6-(2-chloro-6-methylphenyl)-6H-benzo[4,5]thieno-[3,2-*b*]benzo[4,5]thieno[2,3-*e*][1,4]thiazine (3p)

The product was prepared in accordance to general procedure V.

| <b>6-(2,6-dichlorophenyl)-6H-benzo[4,5]thieno[3,2-<i>b</i>]benzo[4,5]thieno[2,3-<i>e</i>][1,4]thiazine (3g)</b> | <b>PEPPSI-IPr</b> | <b>MeMgCl (3.00 M)</b> | <b>solvent</b> |
|-----------------------------------------------------------------------------------------------------------------|-------------------|------------------------|----------------|
| 0.500 mmol                                                                                                      | 10.0 mmol%        | 1.10 mmol              | 6.00 mL        |
| 228 mg                                                                                                          | 34.0 mg           | 367 $\mu$ L            | THF            |

The solution of methylmagnesium chloride in THF (3.00 M) was added at a rate of 2.00  $\mu$ L min<sup>-1</sup>. The product was eluted by flash column chromatography with <sup>n</sup>hexane. Recrystallization was carried out in toluene (5 mL). Yield: brownish crystals, 97.9 mg, 0.225 mmol, 45%; Mp.: 268°C°; <sup>1</sup>H NMR (300 MHz, THF-*d*<sub>8</sub>)  $\delta$  2.53 (s, 3H), 7.16 – 7.23 (m, 2H), 7.28 – 7.40 (m, 4H), 7.40 – 7.45 (m, 1H), 7.48 (t, <sup>3</sup>J<sub>HH</sub> = 7.63 Hz, 1H), 7.51 – 7.56 (m, 1H), 7.56 – 7.63 (m, 2H). <sup>13</sup>C-<sup>1</sup>H-NMR (75 MHz, THF-*d*<sub>8</sub>)  $\delta$  18.3 (CH<sub>3</sub>), 98.6 (C<sub>quart.</sub>), 120.2 (CH), 122.9 (CH), 124.0 (CH), 126.14 (CH), 129.9 (CH), 131.5 (CH), 132.4 (CH), 134.1 (C<sub>quart.</sub>), 136.9 (C<sub>quart.</sub>), 137.6 (C<sub>quart.</sub>), 138.5 (C<sub>quart.</sub>), 140.1 (C<sub>quart.</sub>), 142.8 (C<sub>quart.</sub>). HR-ESI-MS calc. for [C<sub>23</sub>H<sub>14</sub>CINS<sub>3</sub>]<sup>+</sup>: 434.9971; found: 434.9969. IR:  $\tilde{\nu}$  [cm<sup>-1</sup>] = 2972 (w), 1591 (w), 1572 (m), 1514 (s), 1456 (m), 1435 (m), 1375 (w), 1348 (w), 1285 (s), 1240 (s), 1177 (w), 1155 (w), 1150 (w), 1080 (w), 1063 (m), 1018 (w), 864 (m), 839 (m), 773 (s), 743 (s), 718 (s), 681 (m). Elemental analysis calc. for C<sub>22</sub>H<sub>11</sub>Cl<sub>2</sub>NS<sub>3</sub>: C 63.36, H 3.24, N 3.21, S 22.06; found: C 63.16, H 3.26, N 3.19, S 21.82.

1.2.4.9 6-(2-Chloro-6-methoxyphenyl)-6H-benzo[4,5]thieno[3,2-b]benzo[4,5]thieno[2,3-e][1,4]thiazine (3q)

The product was prepared in accordance to general procedure IV.

| <b>3,9-dibromo-6-(2-chloro-6-methoxyphenyl)-6H-benzo[4,5]thieno[3,2-b]benzo[4,5]thieno[2,3-e][1,4]thiazine (4b)</b> | <b>TMEDA</b> | <b><i>n</i>butyllithium(1.60 M)</b> | <b>methanol</b> | <b>solvent</b> |
|---------------------------------------------------------------------------------------------------------------------|--------------|-------------------------------------|-----------------|----------------|
| 0.715 mmol                                                                                                          | 1.72 mmol    | 1.72 mmol                           | 7.15 mmol       | 20.0 mL        |
| 436 mg                                                                                                              | 199 mg       | 1.11 mL                             | 289 $\mu$ l     | THF            |

In addition to that, distilled water was added to the reaction mixture. The followingly extraction was carried out with dichloromethane (3 x 40 mL) and the combined organic phases were dried with magnesium sulfate (anhydrous). After repeated washing with *n*pentane (20 mL) while ultrasonification the product was isolated. Yield: orange powder, 313 mg, 0.692 mmol, 97 %. Mp.: 281.5°C; <sup>1</sup>H NMR (300 MHz, THF-*d*<sub>8</sub>)  $\delta$  3.85 (s, 3H), 7.13 – 7.20 (m, 2H), 7.20 – 7.39 (m, 6H), 7.54 (t, <sup>3</sup>J<sub>HH</sub> = 8.24 Hz, 1H), 7.54 – 7.58 (m, 2H). <sup>13</sup>C-{<sup>1</sup>H}-NMR (75 MHz, THF-*d*<sub>8</sub>)  $\delta$  57.0 (CH<sub>3</sub>), 98.6 (C<sub>quart.</sub>), 112.7 (CH), 120.1 (CH), 122.8 (CH), 123.0 (CH), 123.8 (CH), 125.9 (CH), 128.4 (C<sub>quart.</sub>), 133.1 (CH), 134.1 (C<sub>quart.</sub>), 137.6 (C<sub>quart.</sub>), 137.7 (C<sub>quart.</sub>), 141.2 (C<sub>quart.</sub>), 160.4 (C<sub>quart.</sub>). HR-ESI-MS calc. for [C<sub>23</sub>H<sub>14</sub>CINOS<sub>3</sub>]<sup>+</sup>: 450.9926; found: 450.9928. IR:  $\tilde{\nu}$  [cm<sup>-1</sup>] = 1584 (m), 1572 (m), 1514 (s), 1454 (m), 1433 (s), 1283 (s), 1261 (m), 1242 (s), 1155 (w), 1045 (s), 943 (w), 854 (w), 785 (m), 741 (s), 718 (s). Elemental analysis calc. for C<sub>23</sub>H<sub>14</sub>CINOS<sub>3</sub>: C 61.12, H 3.12, N 3.10, S 21.28; found: C 61.40, H 3.31, N 3.05, S 21.16.

1.2.4.10 6-(2,6-Fluorophenyl)-6H-benzo[4,5]thieno[3,2-b]benzo[4,5]thieno[2,3-e][1,4]thiazine (3h)

The product was prepared in accordance to general procedure II.

| <b>bis(2-bromobenzo[<i>b</i>]thiophen-3-yl)sulfane (1)</b> | <b>2,6-difluoroanilin</b> | <b>Pd(dba)<sub>2</sub></b> | <b>Xantphos</b> | <b>sodium<sup>tert</sup>butoxide</b> | <b>solvent / reaction time</b> |
|------------------------------------------------------------|---------------------------|----------------------------|-----------------|--------------------------------------|--------------------------------|
| 0.500 mmol                                                 | 0.500 mmol                | 7.50 mol%                  | 15.0 mol%       | 15.0 mmol                            | 9.00 mL toluene                |
| 228 mg                                                     | 53.9 $\mu$ L              | 21.6 mg                    | 41.6 mg         | 144 mg                               | 24 h                           |

The product was eluted by flash column chromatography with *n*hexane/triethylamine in ratio of 100:2 as eluent. Recrystallization was carried out in *n*hexane (60 mL). Yield: brownish crystals,

0.14 g, 0.32 mmol, 64%; Mp.: 215-216°C°; <sup>1</sup>H NMR (300 MHz, THF-*d*<sub>8</sub>) δ 7.19 – 7.27 (m, 2H), 7.27 – 7.43 (m, 6H), 7.59 – 7.65 (m, 2H), 7.65 – 7.73 (m, 1H). <sup>13</sup>C-<sup>1</sup>H-NMR (75 MHz, THF-*d*<sub>8</sub>) δ 100.7 (C<sub>quart</sub>), 114.2 (CH, dd, <sup>2</sup>J<sub>CF</sub> = 20.1, <sup>4</sup>J<sub>CF</sub> = 3.5 Hz), 119.7 (C<sub>quart</sub>, t, <sup>2</sup>J<sub>CF</sub> = 16.4 Hz), 120.5 (CH), 123.0 (CH), 124.5 (CH), 126.3 (CH), 133.62 (CH, t, <sup>3</sup>J<sub>CF</sub> = 10.1 Hz), 134.2 (C<sub>quart</sub>), 137.3 (C<sub>quart</sub>), 140.6 (C<sub>quart</sub>), 162.0 (C<sub>quart</sub>, dd, <sup>1</sup>J<sub>CF</sub> = 255.3, <sup>3</sup>J<sub>CF</sub> = 3.1 Hz). <sup>19</sup>F-NMR (282 MHz, THF) δ -117.4. HR-ESI-MS calc. for [C<sub>22</sub>H<sub>12</sub>FNS<sub>3</sub>]<sup>+</sup>: 423.0022; found: 423.0024. IR:  $\tilde{\nu}$  [cm<sup>-1</sup>] = 3065 (w), 2890 (w), 2968 (w), 2901 (w), 1612 (w), 1589 (m), 1578 (m), 1555 (m), 1518 (s), 1499 (m), 1472 (s), 1456 (m), 1435 (s), 1383 (w), 1350 (w), 1304 (w), 1288 (s), 1265 (m), 1242 (s), 1158 (w), 1153 (w), 1128 (w), 1063 (m), 1023 (w), 1005 (s), 949 (m), 940 (w), 930 (w), 795 (m), 765 (w), 751 (m), 741 (s), 716 (s), 706 (m), 685 (w), 645 (w), 634 (w). Elemental analysis calc. for C<sub>22</sub>H<sub>11</sub>F<sub>2</sub>NS<sub>3</sub>: C 62.39, H 2.62, N 3.31, S 22.71; found: C 62.15, H 2.59, N 3.31, S 22.95.

#### 1.2.4.11 6-(2-fluoro-6-methylphenyl)-6H-benzo[4,5]thieno[3,2-*b*]benzo[4,5]thieno[2,3-*e*][1,4]thiazine (3r)

The product was prepared in accordance to general procedure V.

| <b>6-(2-fluoro-6-methylphenyl)-6H-benzo[4,5]thieno[3,2-<i>b</i>]benzo[4,5]thieno[2,3-<i>e</i>][1,4]thiazine (3o)</b> | <b>PEPPSI-IPr</b>       | <b>MeMgCl (3.00 M)</b> | <b>solvent</b> |
|----------------------------------------------------------------------------------------------------------------------|-------------------------|------------------------|----------------|
| 1.00 mmol                                                                                                            | 5.00 mmol% + 5.00 mmol% | 1.20 mmol + 0.300 mmol | 12.0 mL        |
| 439 mg                                                                                                               | 34.0 mg + 34.0 mg       | 400 μL + 100 μL        | THF            |

The solution of methylmagnesium chloride in THF (3.00 M) was added at a rate of 4.00 μL min<sup>-1</sup>. After the reaction was not complete according to the method described in the general procedure V, PEPPSI-IPr (34.0 mg, 5.00 mmol%) was added again and the reaction solution was stirred for another 0.75 h at 80°C. Further grignard reagent was then added at 8.00 μL min<sup>-1</sup> and afterwards was stirred for another 0.5 h. The product was eluted by flash column chromatography with <sup>n</sup>hexane. Recrystallization was carried out in toluene (5 mL). Yield: yellow crystals, 110 mg, 0.263 mmol, 26%; Mp.: 220-221°C°; <sup>1</sup>H NMR (300 MHz, THF-*d*<sub>8</sub>) δ 2.50 (s, 3H), 7.16 – 7.23 (m, 2H), 7.23 – 7.42 (m, 6H), 7.45 – 7.55 (m, 1H), 7.55 – 7.63 (m, 2H). <sup>13</sup>C-<sup>1</sup>H-NMR (75 MHz, THF-*d*<sub>8</sub>) δ 17.4 (CH<sub>3</sub>), 99.0 (C<sub>quart</sub>), 115.8 (CH, d, <sup>2</sup>J<sub>CF</sub> = 20.0 Hz), 120.3 (CH), 122.9 (CH), 124.1 (CH), 126.2 (CH), 128.2 (CH, d, <sup>4</sup>J<sub>CF</sub> = 3.5 Hz), 129.2 (C<sub>quart</sub>, d, <sup>2</sup>J<sub>CF</sub> = 12.7 Hz), 132.8 (CH, d, <sup>3</sup>J<sub>CF</sub> = 8.9 Hz), 134.1 (C<sub>quart</sub>), 137.6 (C<sub>quart</sub>), 140.9 (C<sub>quart</sub>), 142.7 (C<sub>quart</sub>), 161.6 (C<sub>quart</sub>, d, <sup>1</sup>J<sub>CF</sub> = 252.4 Hz). <sup>19</sup>F-NMR (282 MHz, THF) δ -120.37. HPLC (99%) and HR-ESI-MS calc. for [C<sub>23</sub>H<sub>14</sub>FNS<sub>3</sub>]<sup>+</sup>: 420.0306; found: 420.0340. IR:  $\tilde{\nu}$  [cm<sup>-1</sup>]

= 1570 (w), 1514 (m), 1470 (w), 1514 (s), 1456 (m), 1433 (m), 1375 (w), 1279 (s), 1240 (m), 1155 (w), 1165 (w), 1016 (w), 941 (w), 783 (m), 741 (s), 716 (s).

1.2.4.12 6-(2-Fluoro-6-methoxyphenyl)-6H-benzo[4,5]thieno[3,2-b]benzo[4,5]thieno[2,3-e][1,4]thiazine (3s)

The product was prepared in accordance to general procedure IV.

| <b>3,9-dibromo-6-(2-fluoro-6-methoxyphenyl)-6H-benzo[4,5]thieno[3,2-b]benzo[4,5]thieno[2,3-e][1,4]thiazine (4c)</b> | <b>TMEDA</b> | <b><sup>n</sup>butyllithium (2.45 M)</b> | <b>methanol</b> | <b>solvent</b> |
|---------------------------------------------------------------------------------------------------------------------|--------------|------------------------------------------|-----------------|----------------|
| 1.34 mmol                                                                                                           | 3.22 mmol    | 3.22 mmol                                | 11.3 mmol       | 50.0 mL        |
| 766 mg                                                                                                              | 373 mg       | 1.31 mL                                  | 457 $\mu$ l     | THF            |

In addition to that, distilled water was added to the reaction mixture. The followingly extraction was carried out with ethylacetate (3 x 50 mL) and the combined organic phases were dried with magnesium sulfate (anhydrous). Recrystallization was carried out in toluene (10 mL). Yield: yellow crystals, 300 mg, 0.688 mmol, 52 %; Mp.: 196-201°C°; <sup>1</sup>H NMR (300 MHz, THF-*d*<sub>8</sub>)  $\delta$  3.85 (s, 3H), 6.93 – 7.02 (m, 1H), 7.02 – 7.10 (m, 1H), 7.12 – 7.23 (m, 2H), 7.26 – 7.41 (m, 4H), 7.49 – 7.61 (m, 3H). <sup>13</sup>C-<sup>1</sup>H-NMR (75 MHz, THF-*d*<sub>8</sub>)  $\delta$  57.0 (CH<sub>3</sub>, d, <sup>5</sup>*J*<sub>CF</sub> = 3.4 Hz, OMe), 98.9 (C<sub>quart.</sub>), 109.6 (CH, d, <sup>2</sup>*J*<sub>CF</sub> = 17.9 Hz), 109.7 (CH, d, <sup>4</sup>*J*<sub>CF</sub> = 5.8 Hz), 119.1 (C<sub>quart.</sub>, d, <sup>2</sup>*J*<sub>CF</sub> = 14.9 Hz), 120.1 (CH), 122.8 (CH), 123.9 (CH), 126.0 (CH), 133.2 (CH, d, <sup>3</sup>*J*<sub>CF</sub> = 10.5 Hz), 134.1 (C<sub>quart.</sub>), 137.6 (C<sub>quart.</sub>), 141.8 (C<sub>quart.</sub>), 160.2 (C<sub>quart.</sub>, d, <sup>3</sup>*J*<sub>CF</sub> = 3.1 Hz), 162.2 (C<sub>quart.</sub>, d, <sup>1</sup>*J*<sub>CF</sub> = 251.8 Hz). <sup>19</sup>F-NMR (282 MHz, THF)  $\delta$  -119.8. HR-ESI-MS calc. for [C<sub>23</sub>H<sub>14</sub>FNOS<sub>3</sub>]<sup>+</sup>: 435.0222; found: 435.0217. IR:  $\tilde{\nu}$  [cm<sup>-1</sup>] = 1609 (w), 1572 (m), 1514 (s), 1495 (m), 1477 (s), 1435 (s), 1302 (w), 1287 (s), 1242 (m), 1155 (w), 1083 (s), 937 (w), 791 (m), 765 (m), 739 (s), 716 (s), 637 (w). Elemental analysis calc. for C<sub>23</sub>H<sub>14</sub>FNOS<sub>3</sub>: C 63.43, H 3.24, N 3.22, S 22.08; found: C 63.15, H 3.41, N 3.11, S 21.79.

1.2.4.13 6-(2,6-dimethylphenyl)-6H-benzo[4,5]thieno[3,2-b]benzo[4,5]thieno[2,3-e][1,4]thiazine (3i)

The product was prepared in accordance to general procedure V.

| <b>6-(2,6-dichlorophenyl)-6H-benzo[4,5]thieno[3,2-b]benzo[4,5]thieno[2,3-e][1,4]thiazine (3g)</b> | <b>PEPPSI-IPr</b> | <b>MeMgCl (3.00 M)</b> | <b>solvent</b> |
|---------------------------------------------------------------------------------------------------|-------------------|------------------------|----------------|
| 1.00 mmol                                                                                         | 10.0 mmol%        | 2.40 mmol              | 12.0 mL        |
| 456 mg                                                                                            | 67.9 mg           | 800 $\mu$ L            | THF            |



The solution of methylmagnesium chloride in THF (3.00 M) was added at a rate of 4.00  $\mu\text{L min}^{-1}$ . The product was eluted by flash column chromatography with a gradient of  $n$ hexane/THF in a ratio from 100:0 to 100:3. Recrystallization was carried out in toluene (5 mL). Yield: orange crystals, 177 mg, 0.436 mmol, 44 %; Mp.: 226-227°C;  $^1\text{H NMR}$  (300 MHz, THF- $d_8$ )  $\delta$  2.46 (s, 6H), 7.13 – 7.20 (m, 2H), 7.24 – 7.30 (m, 4H), 7.32 – 7.40 (m, 3H), 7.56 (d,  $^3J_{HH} = 7.94$  Hz, 2H).  $^{13}\text{C}\{-^1\text{H}\}$ -NMR (75 MHz, THF- $d_8$ )  $\delta$  18.0 (CH<sub>3</sub>), 97.6 (C<sub>quart</sub>), 120.0 (CH), 122.8 (CH), 123.8 (CH), 126.1 (CH), 130.6 (CH), 131.3 (CH), 134.0 (C<sub>quart</sub>), 137.8 (C<sub>quart</sub>), 139.9 (C<sub>quart</sub>), 140.2 (C<sub>quart</sub>), 140.8 (C<sub>quart</sub>). ESI-MS ( $m/z$ ): 310 ([C<sub>16</sub>H<sub>8</sub>NS<sub>3</sub>]<sup>+</sup>), 415 (C<sub>24</sub>H<sub>17</sub>NS<sub>3</sub>). IR:  $\tilde{\nu}$  [ $\text{cm}^{-1}$ ] = 2916 (w), 1591 (w), 1568 (m), 1510 (s), 1456 (m), 1435 (m), 1371 (m), 1348 (w), 1283 (s), 1240 (s), 1157 (m), 1130 (w), 1096 (w), 1090 (w), 1063 (m), 1018 (m), 972 (w), 951 (m), 928 (w), 766 (s), 741 (s), 718 (s), 687 (m). Elemental analysis calc. for C<sub>24</sub>H<sub>17</sub>NS<sub>3</sub>: C 69.36, H 4.12, N 3.37, S 23.14; found: C 69.23, H 4.24, N 3.29, S 23.08.

#### 1.2.4.14 6-(2-methoxy-6-methylphenyl)-6H-benzo[4,5]thieno[3,2-*b*]benzo[4,5]thieno[2,3-*e*][1,4]thiazine (3t)

The product was prepared in accordance to general procedure V.

| <b>6-(2-chloro-6-methoxyphenyl)-6H-benzo[4,5]thieno[3,2-<i>b</i>]benzo[4,5]thieno[2,3-<i>e</i>][1,4]thiazin (3q)</b> | <b>PEPPSI-IPr</b> | <b>MeMgCl (3.00 M)</b> | <b>solvent</b> |
|----------------------------------------------------------------------------------------------------------------------|-------------------|------------------------|----------------|
| 0.609 mmol                                                                                                           | 15.0 mmol%        | 0.730 mmol             | 8.0 mL         |
| 275 mg                                                                                                               | 61.9 mg           | 243 $\mu\text{L}$      | THF            |

The solution of methylmagnesium chloride in THF (3.00 M) was added at a rate of 12.0  $\mu\text{L min}^{-1}$ . The product was eluted by flash column chromatography with  $n$ hexane/THF in a ratio from 100:2. After repeated washing with  $n$ pentane (25 mL) while ultrasonification the product was isolated. Yield: yellow powder, 101 mg, 0.282 mmol, 46%; Mp.: 248°C;  $^1\text{H NMR}$  (300 MHz, THF- $d_8$ )  $\delta$  2.45 (s, 3H), 3.79 (s, 3H), 6.97 – 7.08 (m, 2H), 7.10 – 7.18 (m, 2H), 7.22 – 7.28 (m, 2H), 7.29 – 7.37 (m, 2H), 7.38 – 7.46 (m, 1H), 7.51 – 7.56 (m, 2H).  $^{13}\text{C}\{-^1\text{H}\}$ -NMR (75 MHz, THF- $d_8$ )  $\delta$  17.6 (CH<sub>3</sub>), 56.4 (CH<sub>3</sub>), 97.6 (C<sub>quart.</sub>), 111.4 (CH), 119.9 (CH), 122.7 (CH), 123.5 (CH), 123.8 (CH), 125.9 (CH), 129.8 (C<sub>quart.</sub>), 132.1 (CH), 134.1 (C<sub>quart.</sub>), 137.8 (C<sub>quart.</sub>), 141.4 (C<sub>quart.</sub>), 142.1 (C<sub>quart.</sub>), 158.8 (C<sub>quart.</sub>). HR-ESI-MS calc. for [C<sub>24</sub>H<sub>17</sub>NOS<sub>3</sub>]<sup>+</sup>: 431.0472; found: 431.0471. IR:  $\tilde{\nu}$  [ $\text{cm}^{-1}$ ] = 1587 (w), 1570 (w), 1558 (m), 1508 (s), 1473 (m), 1456 (m), 1435 (s), 1279 (s), 1260 (m), 1240 (s), 1082 (s), 1065 (m), 1018 (w), 910 (w), 850 (w), 789 (w), 758 (m), 741 (s), 716 (s). Elemental analysis calc. for C<sub>24</sub>H<sub>17</sub>NOS<sub>3</sub>: C 66.79, H 3.97, N 3.25, S 22.29; found: C 66.75, H 3.88, N 3.19, S 22.43.

1.2.4.15 6-(2,6-dimethoxyphenyl)-6*H*-benzo[4,5]thieno[3,2-*b*]benzo[4,5]thieno[2,3-*e*][1,4]thiazine (3j)

The product was prepared in accordance to general procedure IV.

| 3,9-dibromo-6-(2,6-dimethoxyphenyl)-6 <i>H</i> -benzo[4,5]thieno[3,2- <i>b</i> ]benzo[4,5]thieno[2,3- <i>e</i> ][1,4]thiazine (4d) | TMEDA      | <sup>n</sup> butyllithium (1.60 M) | methanol    | solvent |
|------------------------------------------------------------------------------------------------------------------------------------|------------|------------------------------------|-------------|---------|
| 0.0758 mmol                                                                                                                        | 0.182 mmol | 0.182 mmol                         | 0.758 mmol  | 2.50 mL |
| 45.9 g                                                                                                                             | 21.1 mg    | 114 $\mu$ l                        | 457 $\mu$ l | THF     |

In addition to that, distilled water was added to the reaction mixture. The followingly extraction was carried out with dichloromethane (3 x 20 mL) and the combined organic phases were dried with magnesium sulfate (anhydrous). After repeated washing with ethylacetate (5 mL) and <sup>n</sup>pentane (20 mL) while ultrasonification the product was isolated. Yield: orange powder, 31.1 mg, 0.069 mmol, 92 %; Mp.: 267-268°C°; <sup>1</sup>H NMR (300 MHz, THF-*d*<sub>8</sub>)  $\delta$  3.82 (s, 6H), 6.79 – 6.84 (m, 2H), 7.09 – 7.16 (m, 2H), 7.19 – 7.25 (m, 2H), 7.28 – 7.35 (m, 2H), 7.43 – 7.54 (m, 3H). <sup>13</sup>C-<sup>1</sup>H-NMR (75 MHz, THF-*d*<sub>8</sub>)  $\delta$  56.5 (CH<sub>3</sub>), 97.7 (C<sub>quart</sub>), 105.6 (CH), 119.2 (C<sub>quart</sub>), 119.8 (CH), 122.5 (CH), 123.2 (CH), 125.7 (CH), 132.5 (CH), 133.9 (C<sub>quart</sub>), 137.8 (C<sub>quart</sub>), 142.9 (C<sub>quart</sub>), 159.6 (C<sub>quart</sub>). HPLC (99%) and HR-ESI-MS calc. for [C<sub>24</sub>H<sub>17</sub>NO<sub>2</sub>S<sub>3</sub>]<sup>+</sup>: 448.0455; found: 448.0499. IR:  $\tilde{\nu}$  [cm<sup>-1</sup>] = 2961 (w), 2837 (w), 1589 (m), 1570 (m), 1555 (w), 1512 (s), 1477 (s), 1456 (m), 1433 (s), 1346 (w), 1290 (s), 1258 (s), 1244 (m), 1175 (w), 1157 (w), 1113 (s), 1065 (w), 1034 (w), 1018 (w), 949 (w), 789 (m), 738 (s), 714 (s), 640 (w). Elemental analysis calc. for C<sub>24</sub>H<sub>17</sub>NO<sub>2</sub>S<sub>3</sub>: C 64.40, H 3.83, N 3.13, S 21.49; found: C 64.24, H 3.89, N 3.10, S 21.36.

1.2.5 *Anti-anti*-3,9-dibromo-*N-ortho*(*ortho'*)-(di)substituted-Phenyl-BBTT 4

1.2.5.1 3,9-Dibromo-6-(*o*-tolyl)-6*H*-benzo[4,5]thieno[3,2-*b*]benzo[4,5]thieno[2,3-*e*][1,4]thiazine (4a)

The product was prepared in accordance to general procedure III.

| bis(2,6-dibromobenzo[ <i>b</i> ]thiophen-3-yl)sulfane (2) | 2-methylaniline | Pd(dba) <sub>2</sub> | BINAP     | sodium <sup>tert</sup> butoxide | solvent / reaction time |
|-----------------------------------------------------------|-----------------|----------------------|-----------|---------------------------------|-------------------------|
| 1.00 mmol                                                 | 1.00 mmol       | 3.00 mol%            | 5.00 mol% | 3.00 mmol                       | 4.00 mL toluene         |

|        |        |         |         |        |      |
|--------|--------|---------|---------|--------|------|
| 614 mg | 107 mg | 17.3 mg | 31.1 mg | 288 mg | 24 h |
|--------|--------|---------|---------|--------|------|

The product was eluted by a doubly flash column chromatography with first <sup>n</sup>hexane/triethylamine in a ratio of 100:1 and second <sup>n</sup>hexane as eluent. Yield: orange powder, 345 mg, 0.2617 mmol, 31%; Mp.: 167°C; <sup>1</sup>H NMR (300 MHz, THF-*d*<sub>8</sub>) δ 2.46 (s, 3H), 7.20 (d, <sup>3</sup>J<sub>HH</sub> = 8.43 Hz, 2H), 7.37 – 7.54 (m, 5H), 7.53 – 7.60 (m, 1H), 7.79 (d, <sup>4</sup>J<sub>HH</sub> = 1.79 Hz, 2H). <sup>13</sup>C-{<sup>1</sup>H}-NMR (75 MHz, THF-*d*<sub>8</sub>) δ 17.7 (CH<sub>3</sub>), 98.7 (C<sub>quart</sub>), 116.9 (C<sub>quart</sub>), 121.4 (CH), 125.5 (CH), 129.3 (CH), 129.5 (CH), 130.6 (CH), 131.7 (CH), 133.5 (CH), 135.9 (C<sub>quart</sub>), 136.2 (C<sub>quart</sub>), 139.2 (C<sub>quart</sub>), 141.3 (C<sub>quart</sub>), 142.7 (C<sub>quart</sub>). EI-MS (*m/z* (%)): 560.9 ([C<sub>23</sub>H<sub>13</sub><sup>81</sup>Br<sub>2</sub>NS<sub>3</sub>]<sup>+</sup>, 60), 558.9 ([C<sub>23</sub>H<sub>13</sub><sup>79</sup>Br<sup>81</sup>BrNS<sub>3</sub>]<sup>+</sup>, 100), 556.9 ([C<sub>23</sub>H<sub>13</sub><sup>79</sup>Br<sub>2</sub>NS<sub>3</sub>]<sup>+</sup>, 48), 469.8 ([C<sub>16</sub>H<sub>6</sub><sup>81</sup>Br<sub>2</sub>NS<sub>3</sub>]<sup>+</sup>, 39), 467.8 ([C<sub>16</sub>H<sub>6</sub><sup>79</sup>Br<sup>81</sup>BrNS<sub>3</sub>]<sup>+</sup>, 65), 465.8 ([C<sub>23</sub>H<sub>13</sub><sup>79</sup>Br<sub>2</sub>NS<sub>3</sub>]<sup>+</sup>, 30), 455.8 ([C<sub>16</sub>H<sub>6</sub><sup>81</sup>Br<sub>2</sub>S<sub>3</sub>]<sup>+</sup>, 20), 453.8 ([C<sub>16</sub>H<sub>6</sub><sup>81</sup>Br<sup>79</sup>BrS<sub>3</sub>]<sup>+</sup>, 32), 451.8 ([C<sub>16</sub>H<sub>6</sub><sup>79</sup>Br<sub>2</sub>S<sub>3</sub>]<sup>+</sup>, 16), 388.9 ([C<sub>16</sub>H<sub>6</sub><sup>81</sup>BrNS<sub>3</sub>]<sup>+</sup>, 29), 386.9 ([C<sub>16</sub>H<sub>6</sub><sup>79</sup>BrNS<sub>3</sub>]<sup>+</sup>, 28), 308.0 ([C<sub>16</sub>H<sub>6</sub>NS<sub>3</sub>]<sup>+</sup>, 14), 293.9 ([C<sub>16</sub>H<sub>6</sub>S<sub>3</sub>]<sup>+</sup>, 15). IR:  $\tilde{\nu}$  [cm<sup>-1</sup>] = 1562 (w), 1544 (m), 1504 (s), 1445 (s), 1387 (w), 1285 (m), 1271 (m), 1259 (m), 1233 (m), 1132 (w), 1114 (w), 1080 (w), 1051 (w), 961 (w), 943 (w), 847 (m), 793 (s), 758 (m), 725 (m), 692 (w). Elemental analysis calc. for C<sub>23</sub>H<sub>13</sub>Br<sub>2</sub>NS<sub>3</sub>: C 49.39, H 2.34, N 2.50, S 17.19; found: C 49.51, H 2.54, N 2.45, S 17.38.

#### 1.2.5.2 3,9-Dibromo-6-(2-chloro-6-methoxyphenyl)-6H-benzo[4,5]thieno[3,2-*b*]benzo[4,5]thieno[2,3-*e*][1,4]thiazine (4b)

The product was prepared in accordance to general procedure III.

| bis(2,6-dibromobenzo[ <i>b</i> ]thiophen-3-yl)sulfane (2) | 2-chloro-6-methoxyaniline | Pd( <i>dba</i> ) <sub>2</sub> | BINAP      | sodium <sup>tert</sup> butoxide | solvent / reaction time |
|-----------------------------------------------------------|---------------------------|-------------------------------|------------|---------------------------------|-------------------------|
| 15.0 mmol                                                 | 15.0 mmol                 | 5.00 mol%                     | 10.00 mol% | 45.0 mmol                       | 60.0 mL toluene         |
| 9.21 g                                                    | 2.36 g                    | 216 mg                        | 467 mg     | 4.32 g                          | 42 h                    |

In addition to that, the reaction mixture was filtrated through Celite xx, and washed with water (100 mL). Extraction of the filtrate was carried out with dichloromethane (3 x 250 mL) and the combined organic phases were dried with sodium sulfate (anhydrous). The product was eluted by a doubly flash column chromatography with first <sup>n</sup>hexane/THF in a ratio of 5:1 and second a gradient of cyclohexane/THF in a ratio of 5:1 to 5:2 as eluent. Yield: orange powder, 982 mg, 1.61 mmol, 11%; Mp.: 321-324°C°; <sup>1</sup>H NMR (300 MHz, THF-*d*<sub>8</sub>) δ 3.86 (s, 3H), 7.20 (d, <sup>3</sup>J<sub>HH</sub> = 8.47 Hz, 2H), 7.22 – 7.29 (m, 2H), 7.50 (dd, <sup>3</sup>J<sub>HH</sub> = 8.48, <sup>4</sup>J<sub>HH</sub> = 1.80 Hz, 2H), 7.56 (t, <sup>3</sup>J<sub>HH</sub> = 8.36 Hz, 1H), 7.79 (d, <sup>4</sup>J<sub>HH</sub> = 1.77 Hz, 2H). <sup>13</sup>C-{<sup>1</sup>H}-NMR (75 MHz, THF-*d*<sub>8</sub>) δ 57.1 (CH<sub>3</sub>), 98.7 (C<sub>quart</sub>), 112.9 (CH), 116.8 (C<sub>quart</sub>), 121.4 (CH), 123.2 (CH), 125.5 (CH), 127.9 (C<sub>quart</sub>), 129.4

(CH), 133.4 (CH), 135.6 (C<sub>quart.</sub>), 136.3 (C<sub>quart.</sub>), 137.5 (C<sub>quart.</sub>), 141.9 (C<sub>quart.</sub>), 160.2 (C<sub>quart.</sub>). ESI-MS (*m/z*): 606.8 ([C<sub>23</sub>H<sub>12</sub><sup>79</sup>Br<sub>2</sub><sup>35</sup>CINOS<sub>3</sub>]<sup>+</sup>), 608.8 ([C<sub>23</sub>H<sub>12</sub><sup>79</sup>Br<sup>81</sup>Br<sup>35</sup>CINOS<sub>3</sub>]; [C<sub>23</sub>H<sub>12</sub><sup>79</sup>Br<sub>2</sub><sup>37</sup>CINOS<sub>3</sub>]<sup>+</sup>), 610.8 ([C<sub>23</sub>H<sub>12</sub><sup>81</sup>Br<sub>2</sub><sup>35</sup>CINOS<sub>3</sub>]; [C<sub>23</sub>H<sub>12</sub><sup>79</sup>Br<sup>81</sup>Br<sup>37</sup>CINOS<sub>3</sub>]<sup>+</sup>), 612.8 ([C<sub>23</sub>H<sub>12</sub><sup>81</sup>Br<sub>2</sub><sup>37</sup>CINOS<sub>3</sub>]<sup>+</sup>). IR:  $\tilde{\nu}$  [cm<sup>-1</sup>] = 1582 (w), 1539 (w), 1506 (m), 1445 (s), 1386 (w), 1287 (s), 1261 (m), 1237 (m), 1053 (s), 945 (w), 847 (w), 787 (s), 746 (m), 646 (w). Elemental analysis calc. for C<sub>23</sub>H<sub>12</sub>Br<sub>2</sub>CINOS<sub>3</sub>: C 45.30, H 1.98, N 2.30, S 15.77; found: C 45.54, H 2.27, N 2.17, S 15.80.

### 1.2.5.3 3,9-Dibromo-6-(2-fluoro-6-methoxyphenyl)-6H-benzo[4,5]thieno[3,2-*b*]benzo[4,5]thieno[2,3-*e*][1,4]thiazine (4c)

The product was prepared in accordance to general procedure III.

| bis(2,6-dibromobenzo[ <i>b</i> ]thiophen-3-yl)sulfane (2) | 2-methoxy, 6-fluoroaniline | Pd(dba) <sub>2</sub> | BINAP     | sodium <sup>tert</sup> butoxide | solvent / reaction time |
|-----------------------------------------------------------|----------------------------|----------------------|-----------|---------------------------------|-------------------------|
| 1.00 mmol                                                 | 1.00 mmol                  | 5.00 mol%            | 10.0 mol% | 3.00 mmol                       | 4.00 mL toluene         |
| 614 mg                                                    | 141 mg                     | 28.8 mg              | 62.2 mg   | 288 g                           | 48 h                    |

The product was eluted by a flash column chromatography with <sup>n</sup>hexane/THF in a ratio of 100:3 as eluent. Recrystallization was carried out in toluene (5 mL). Yield: orange powder, 261 mg, 0.440 mmol, 44%; Mp.: 264°C°; <sup>1</sup>H NMR (300 MHz, THF-*d*<sub>8</sub>)  $\delta$  3.87 (s, 3H), 6.95 – 7.05 (m, 1H), 7.07 – 7.14 (m, 1H), 7.16 – 7.24 (m, 2H), 7.50 (dd, <sup>3</sup>*J*<sub>HH</sub> = 8.49, <sup>4</sup>*J*<sub>HH</sub> = 1.82 Hz, 2H), 7.53 – 7.64 (m, 1H), 7.77 – 7.82 (m, 2H). <sup>13</sup>C-<sup>1</sup>H-NMR (75 MHz, THF-*d*<sub>8</sub>)  $\delta$  57.1 (CH<sub>3</sub>), 98.9 (C<sub>quart.</sub>), 109.7 (CH, d, <sup>2</sup>*J*<sub>CF</sub> = 22.7 Hz), 109.8 (CH), 116.9 (C<sub>quart.</sub>), 118.6 (C<sub>quart.</sub>, d, <sup>2</sup>*J*<sub>CF</sub> = 14.8 Hz), 121.4 (CH), 125.5 (CH), 129.5 (CH), 133.6 (CH, d, <sup>3</sup>*J*<sub>CF</sub> = 10.5 Hz), 135.6 (C<sub>quart.</sub>), 136.3 (C<sub>quart.</sub>), 142.5 (C<sub>quart.</sub>), 159.9 (C<sub>quart.</sub>, d, <sup>3</sup>*J*<sub>CF</sub> = 2.7 Hz), 162.0 (C<sub>quart.</sub>, d, <sup>1</sup>*J*<sub>CF</sub> = 252.0 Hz). <sup>19</sup>F-NMR (282 MHz, THF)  $\delta$  -121.67. EI-MS (*m/z* (%)): 595 ([C<sub>23</sub>H<sub>12</sub><sup>81</sup>Br<sub>2</sub>FNS<sub>3</sub>]<sup>+</sup>, 60), 593 ([C<sub>23</sub>H<sub>12</sub><sup>79</sup>Br<sup>81</sup>BrFNS<sub>3</sub>]<sup>+</sup>, 100), 591 ([C<sub>23</sub>H<sub>12</sub><sup>79</sup>Br<sub>2</sub>FNS<sub>3</sub>]<sup>+</sup>, 56), 514 ([C<sub>23</sub>H<sub>12</sub><sup>81</sup>BrFNS<sub>3</sub>]<sup>+</sup>, 12), 512 ([C<sub>23</sub>H<sub>12</sub><sup>79</sup>BrFNS<sub>3</sub>]<sup>+</sup>, 10), 470 ([C<sub>16</sub>H<sub>6</sub><sup>81</sup>Br<sub>2</sub>NS<sub>3</sub>]<sup>+</sup>, 28), 468 ([C<sub>16</sub>H<sub>6</sub><sup>79</sup>Br<sup>81</sup>BrNS<sub>3</sub>]<sup>+</sup>, 48), 466 ([C<sub>16</sub>H<sub>6</sub><sup>79</sup>Br<sub>2</sub>NS<sub>3</sub>]<sup>+</sup>, 23), 389 ([C<sub>16</sub>H<sub>6</sub><sup>81</sup>BrS<sub>3</sub>]<sup>+</sup>, 16), 387 ([C<sub>16</sub>H<sub>6</sub><sup>79</sup>BrS<sub>3</sub>]<sup>+</sup>, 14), 297 (17). Elemental analysis calc. for C<sub>23</sub>H<sub>12</sub>Br<sub>2</sub>FNOS<sub>3</sub>: C 46.56, H 2.04, N 2.36, S 16.21; found: C 46.87, H 2.31, N 2.30, S 16.40.

### 1.2.5.4 3,9-Dibrom-6-(2,6-dimethoxyphenyl)-6H-benzo[4,5]thieno[3,2-*b*]benzo[4,5]thieno[2,3-*e*][1,4]thiazine (4d)

The product was prepared in accordance to general procedure III.

| bis(2,6-dibromobenzo[ <i>b</i> ]thiophen-3-yl)sulfane (2) | 2,6-dimethoxyaniline | Pd(dba) <sub>2</sub> | BINAP     | sodium <sup>tert</sup> butoxide | solvent / reaction time |
|-----------------------------------------------------------|----------------------|----------------------|-----------|---------------------------------|-------------------------|
| 2.00 mmol                                                 | 2.00 mmol            | 3.00 mol%            | 5.00 mol% | 6.00 mmol                       | 8.00 mL toluene         |
| 1.23 g                                                    | 306 mg               | 34.6 mg              | 62.2 mg   | 576 mg                          | 48 h                    |

The product was eluted by a flash column chromatography with a gradient of *n*hexane/THF in a ratio of 100:0 to 10:1 as eluent. The crude product obtained was purified by washing with *n*pentane (15 mL) while ultrasonification. A second flash column chromatographic purification was then carried out with cyclohexane/tetrahydrofuran/triethylamine in a ratio of 100:5:2. After repeated washing with *n*pentane (10 mL) while ultrasonification the product was isolated. Yield: orange powder 87.7 mg, 0.145 mmol, 7%; Mp.: 252-253°C; <sup>1</sup>H NMR (300 MHz, THF-*d*<sub>8</sub>) δ 3.82 (s, 6H), 6.80 (d, <sup>3</sup>J<sub>HH</sub> = 8.50 Hz, 2H), 7.12 (d, <sup>3</sup>J<sub>HH</sub> = 8.44 Hz, 2H), 7.43 – 7.49 (m, 3H), 7.70 (d, <sup>4</sup>J<sub>HH</sub> = 1.79 Hz, 2H). <sup>13</sup>C-{<sup>1</sup>H}-NMR (75 MHz, THF-*d*<sub>8</sub>) δ 56.6 (CH<sub>3</sub>), 97.7 (C<sub>quat.</sub>), 105.7 (CH), 116.4 (C<sub>quat.</sub>), 118.7 (C<sub>quat.</sub>), 121.0 (CH), 125.2 (CH), 129.1 (CH), 132.9 (CH), 135.5 (C<sub>quat.</sub>), 136.5 (C<sub>quat.</sub>), 143.6 (C<sub>quat.</sub>), 159.4 (C<sub>quat.</sub>). EI-MS (*m/z* (%)): 608.9 ([C<sub>24</sub>H<sub>15</sub><sup>81</sup>Br<sub>2</sub>NO<sub>2</sub>S<sub>3</sub>]<sup>+</sup>, 12), 606.9 ([C<sub>24</sub>H<sub>15</sub><sup>79</sup>Br<sup>81</sup>BrN O<sub>2</sub>S<sub>3</sub>]<sup>+</sup>, 25), 604.9 ([C<sub>24</sub>H<sub>15</sub><sup>79</sup>Br<sub>2</sub>N O<sub>2</sub>S<sub>3</sub>]<sup>+</sup>, 20), 455.8 ([C<sub>16</sub>H<sub>6</sub><sup>81</sup>Br<sub>2</sub>S<sub>3</sub>]<sup>+</sup>, 58), 453.8 ([C<sub>16</sub>H<sub>6</sub><sup>79</sup>Br<sup>81</sup>BrS<sub>3</sub>]<sup>+</sup>, 100), 451.8 ([C<sub>16</sub>H<sub>6</sub><sup>79</sup>Br<sub>2</sub>S<sub>3</sub>]<sup>+</sup>, 48), 374.9 ([C<sub>16</sub>H<sub>6</sub><sup>81</sup>BrS<sub>3</sub>]<sup>+</sup>, 26), 372.8 ([C<sub>16</sub>H<sub>6</sub><sup>79</sup>BrS<sub>3</sub>]<sup>+</sup>, 24), 293.9 ([C<sub>16</sub>H<sub>6</sub>S<sub>3</sub>]<sup>+</sup>, 32), 226.9 (28), 146.9 (34). IR:  $\tilde{\nu}$  [cm<sup>-1</sup>] = 1587 (m), 1562 (w), 1541 (m), 1504 (m), 1481 (m), 1440 (m), 1389 (w), 1296 (m), 1261 (s), 1236 (w), 1117 (s), 1051 (w), 995 (w), 945 (m), 849 (m), 790 (s), 741 (m), 659 (w). Elemental analysis calc. for C<sub>24</sub>H<sub>15</sub>Br<sub>2</sub>NO<sub>2</sub>S<sub>3</sub>: C 47.62, H 2.50, N 2.31, S 15.89; found: C 47.93, H 2.58, N 2.28, S 15.88.

## 1.2.6 Byproducts

### 1.2.6.1 Dibenzo[*d,d'*]thieno[3,2-*b'*;4,5-*b'*]dithiophene

The product could be isolated for all syntheses according to general procedure I and II as byproduct formed by the dibrominated sulfane 1. <sup>1</sup>H NMR (600 MHz, THF-*d*<sub>8</sub>) δ 7.39 – 7.43 (m, 2H), 7.45 – 7.50 (m, 2H), 7.94 – 7.97 (m, 2H), 7.97 – 8.00 (m, 2H). <sup>13</sup>C-{<sup>1</sup>H}-NMR (151 MHz, THF-*d*<sub>8</sub>) δ 121.8 (CH), 125.2 (CH), 126.1 (CH), 126.3 (CH), 131.3 (C<sub>quat</sub>), 134.4 (C<sub>quat</sub>), 137.8 (C<sub>quat</sub>), 143.2 (C<sub>quat</sub>). EI-MS (*m/z* (%)): 296 ([C<sub>16</sub>H<sub>8</sub>S<sub>3</sub>]<sup>+</sup>, 100), 264 ([C<sub>16</sub>H<sub>8</sub>S<sub>2</sub>]<sup>+</sup>, 4), 149 (5), 148 ([C<sub>9</sub>H<sub>8</sub>S]<sup>+</sup>, 20), 132 (5).

## 2 NMR-data

### 2.1 BBTTs

#### 2.1.1 *Anti-anti-N-ortho*-substituted-Phenyl-BBTT 3a-e

##### 2.1.1.1 2-(6*H*-benzo[4,5]thieno[3,2-*b*]benzo[4,5]thieno[2,3-*e*][1,4]thiazin-6-yl)benzotrile (3a)

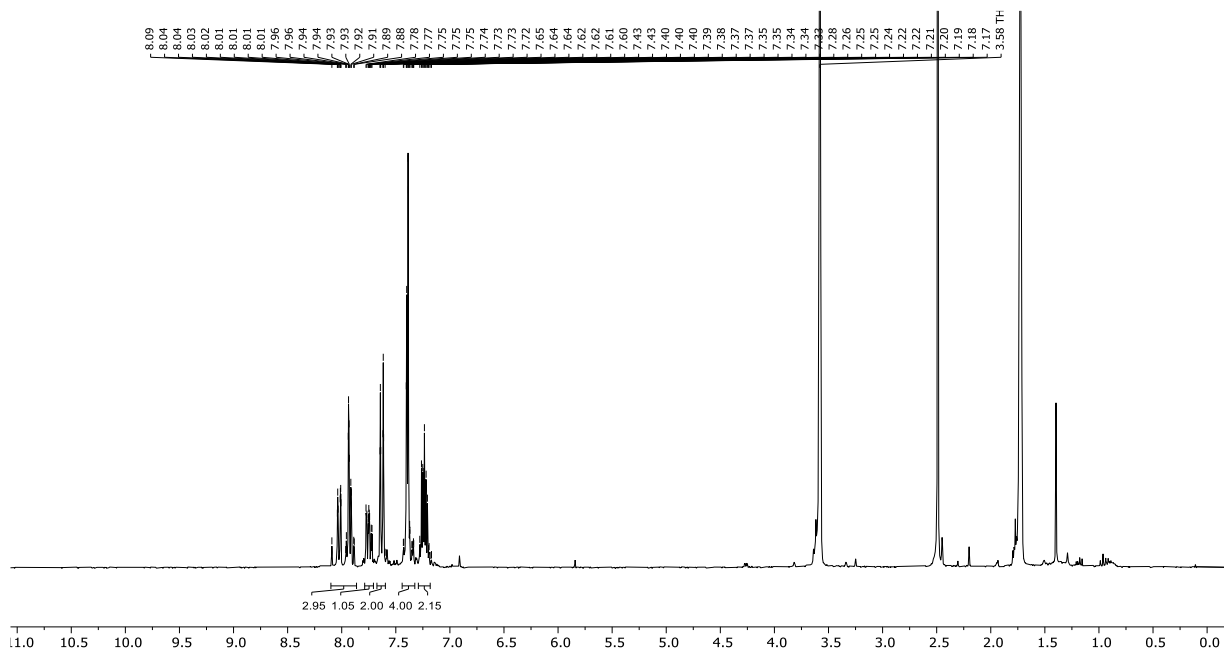

Figure 1.  $^1\text{H-NMR}$  of BBTT **3a** (300 MHz,  $\text{THF-}d_8$ , 298 K).

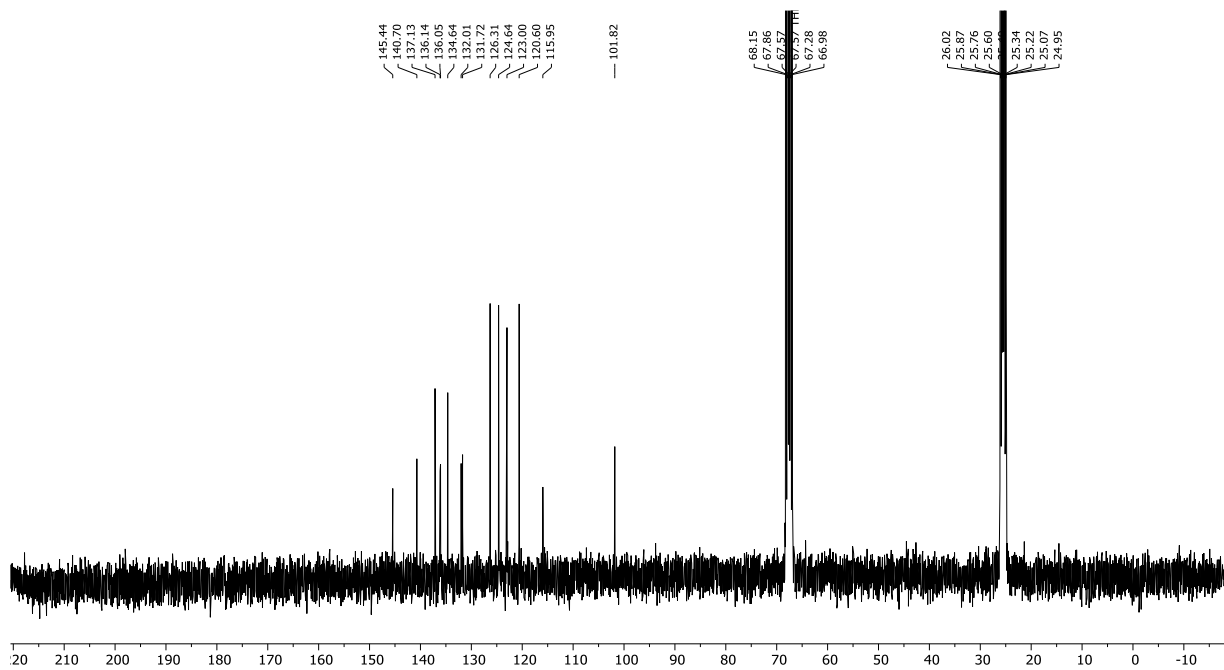

Figure 2.  $^{13}\text{C-}\{^1\text{H}\}$ -NMR of BBTT **3a** (75 MHz,  $\text{THF-}d_8$ , 298 K).

### 2.1.1.2 6-Phenyl-6*H*-benzo[4,5]thieno[3,2-*b*]benzo[4,5]thieno[2,3-*e*][1,4]thiazine (3b)

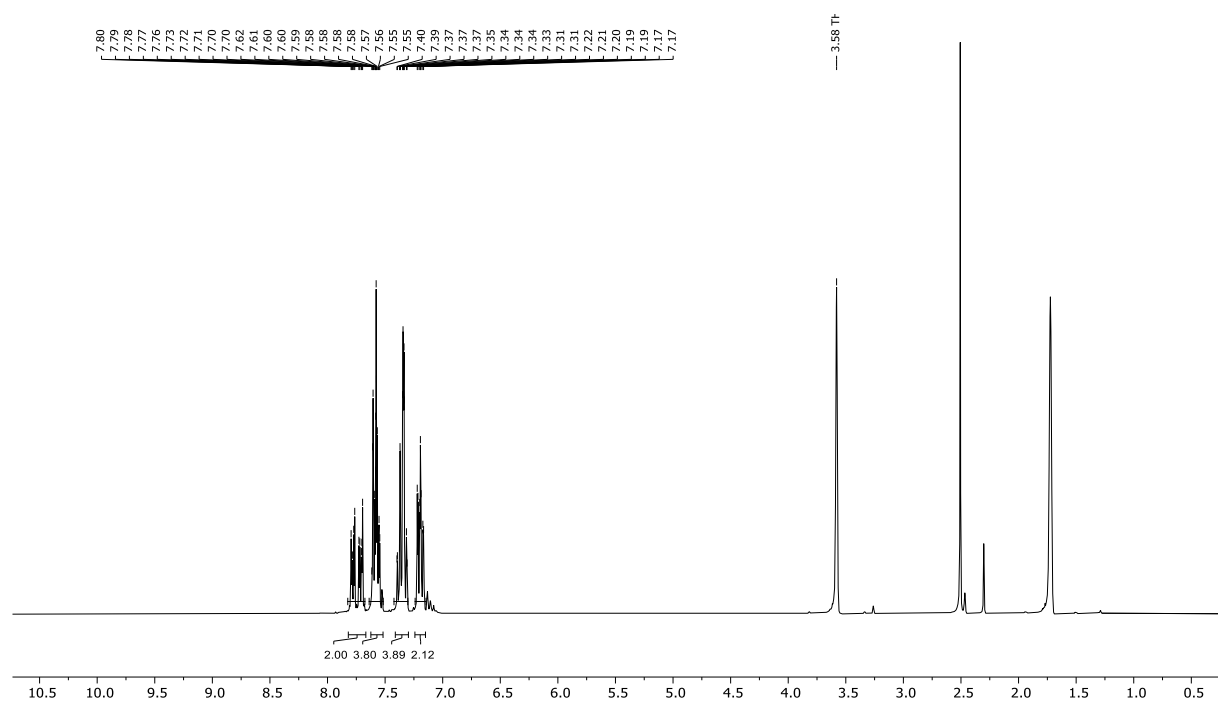

Figure 3.  $^1\text{H-NMR}$  of BBTT **3b** (300 MHz,  $\text{THF-}d_8$ , 298 K).

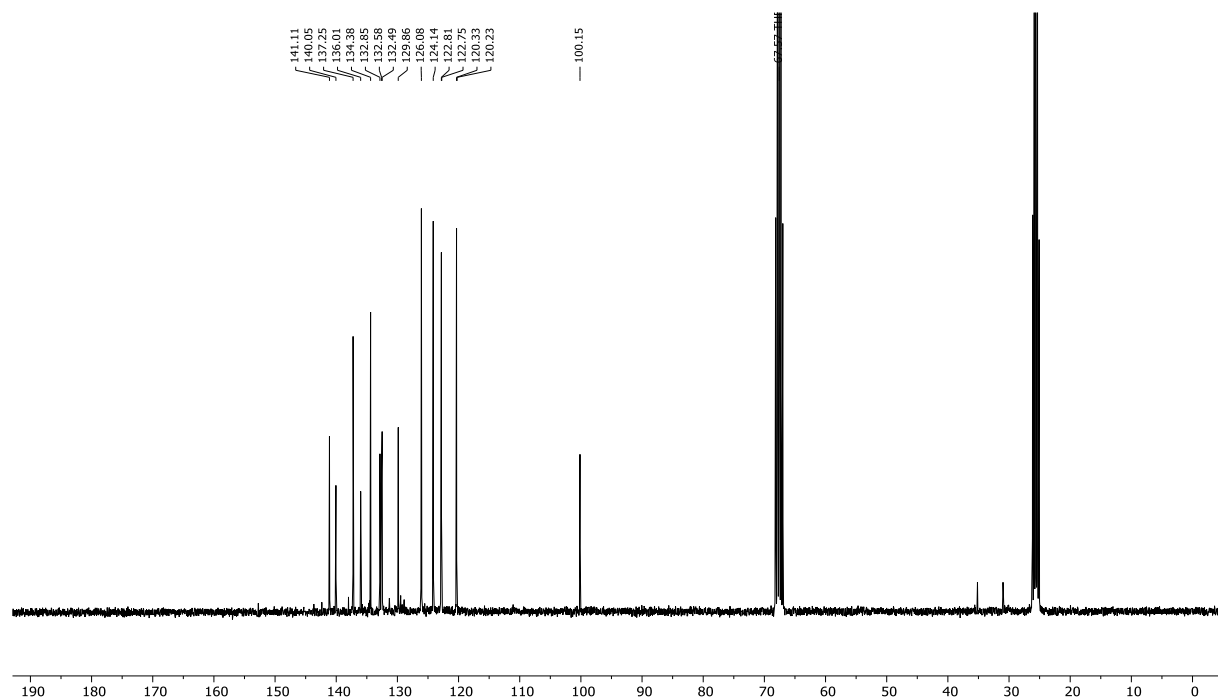

Figure 4.  $^{13}\text{C-}\{^1\text{H}\}$ -NMR of BBTT **3b** (75 MHz,  $\text{THF-}d_8$ , 298 K).

2.1.1.3 6-(2-Fluorophenyl)-6H-benzo[4,5]thieno[3,2-b]benzo[4,5]thieno[2,3-e][1,4]thiazine  
(3c)

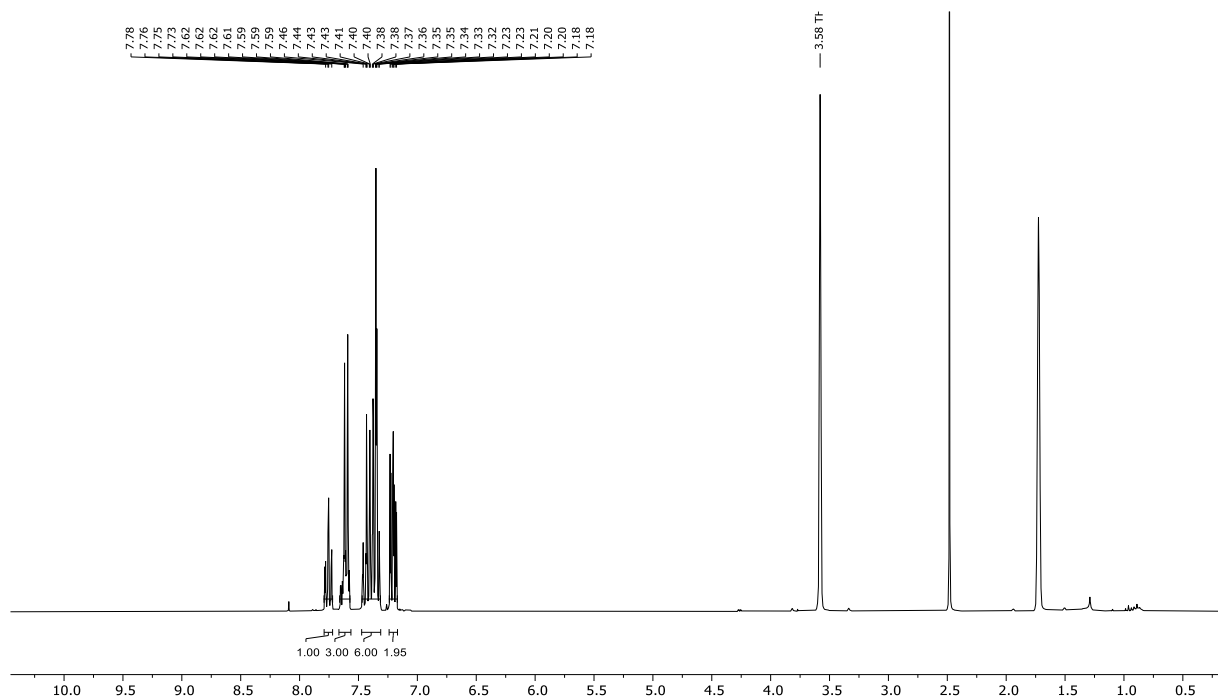

Figure 5.  $^1\text{H-NMR}$  of BBTT **3c** (300 MHz,  $\text{THF-}d_8$ , 298 K).

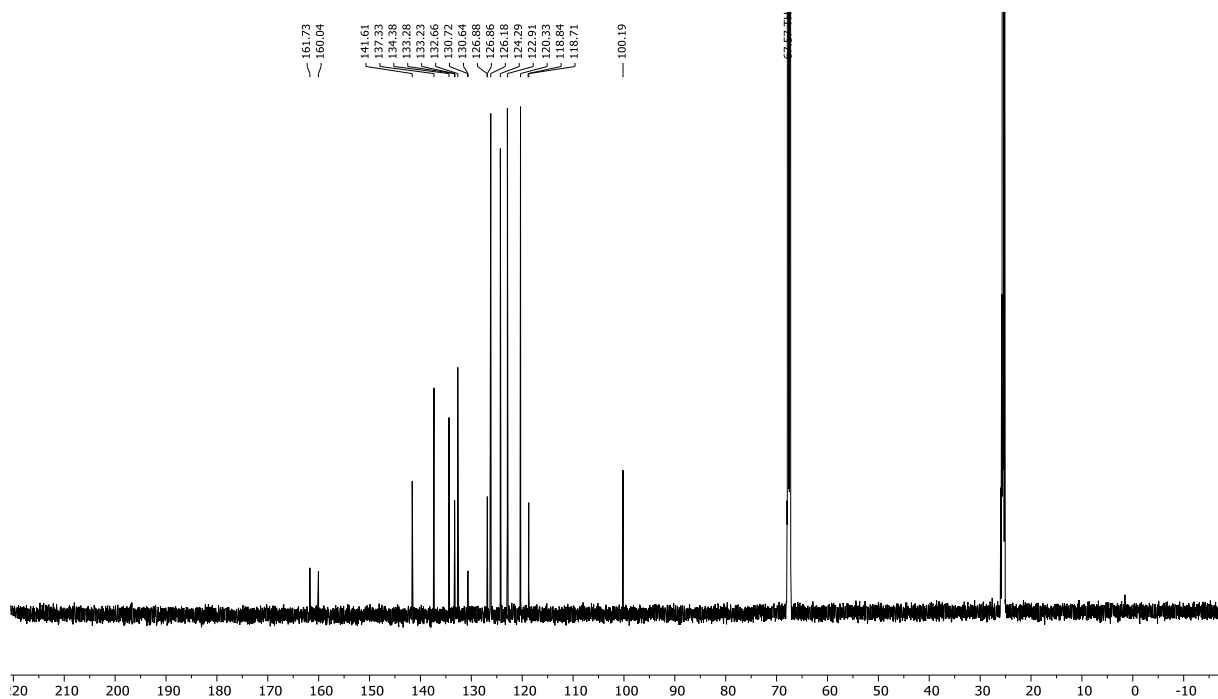

Figure 6.  $^{13}\text{C-}\{^1\text{H}\}$ -NMR of BBTT **3c** (75 MHz,  $\text{THF-}d_8$ , 298 K).



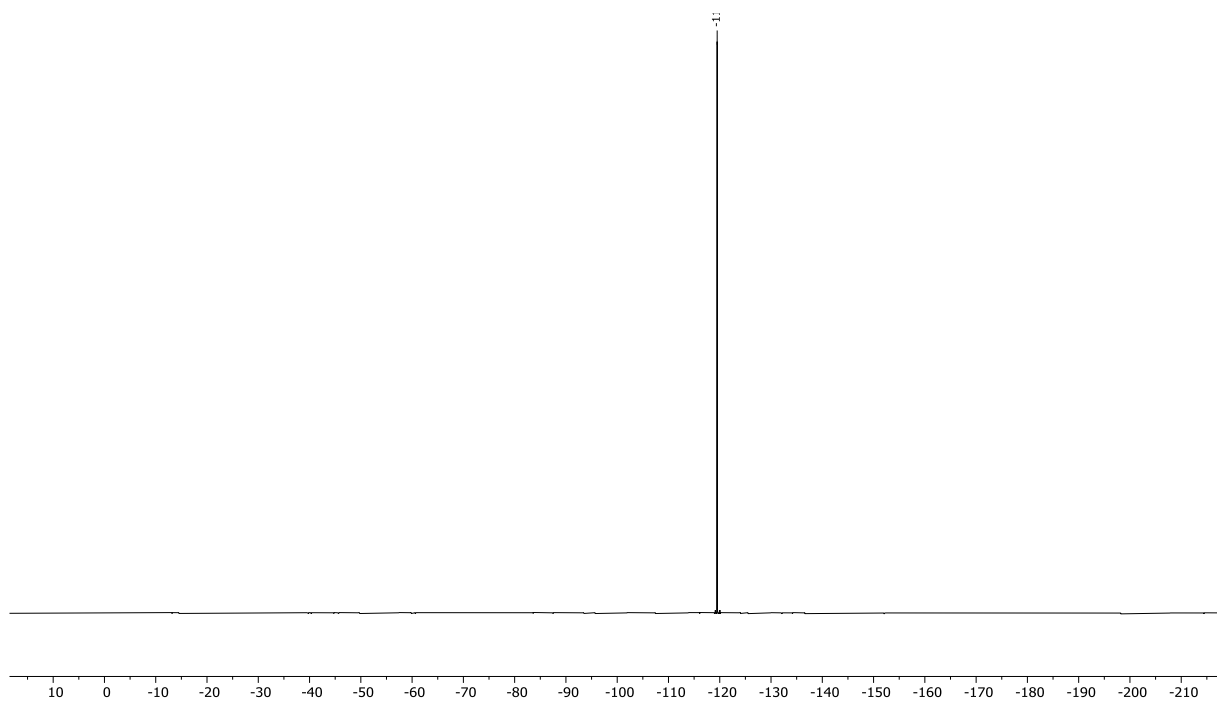

Figure 7.  $^{19}\text{F}$ -NMR of BBTT **3c** (282 MHz,  $\text{THF-}d_6$ , 298 K).

#### 2.1.1.4 6-(*o*-Tolyl)-6H-benzo[4,5]thieno[3,2-*b*]benzo[4,5]thieno[2,3-*e*][1,4]thiazine (3d)

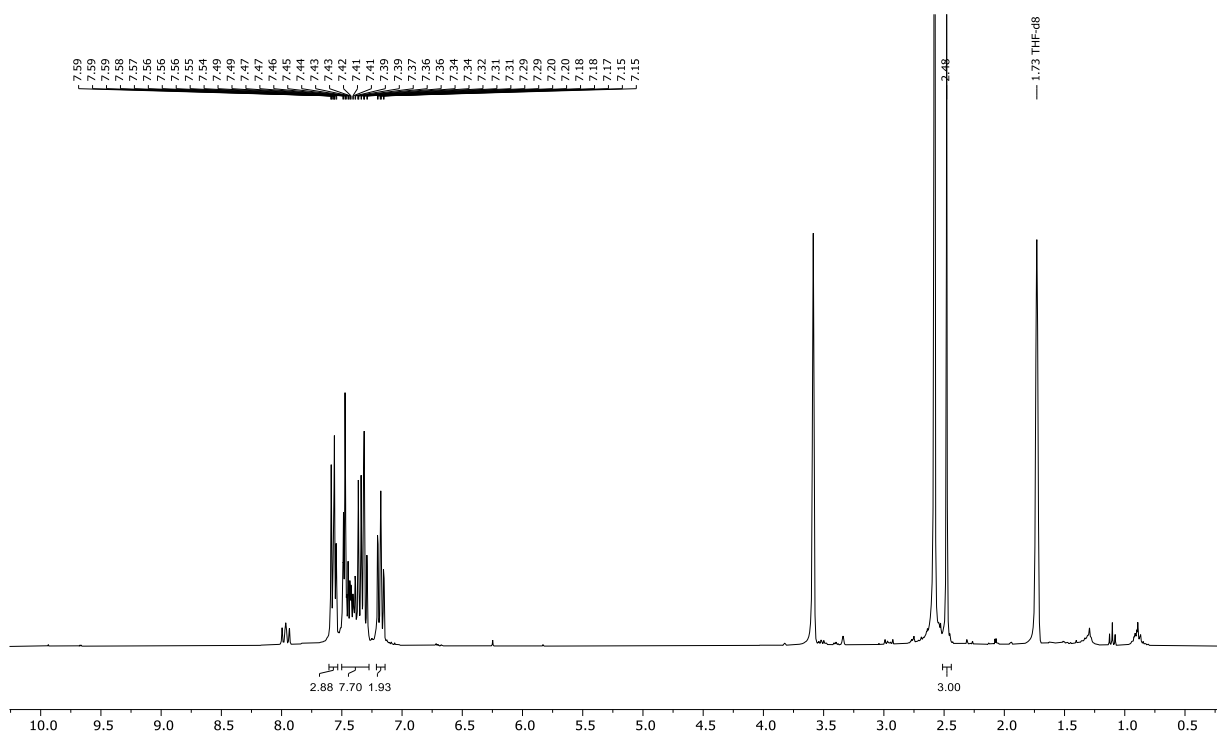

Figure 8.  $^1\text{H}$ -NMR of BBTT **3d** (300 MHz,  $\text{THF-}d_6$ , 298 K).

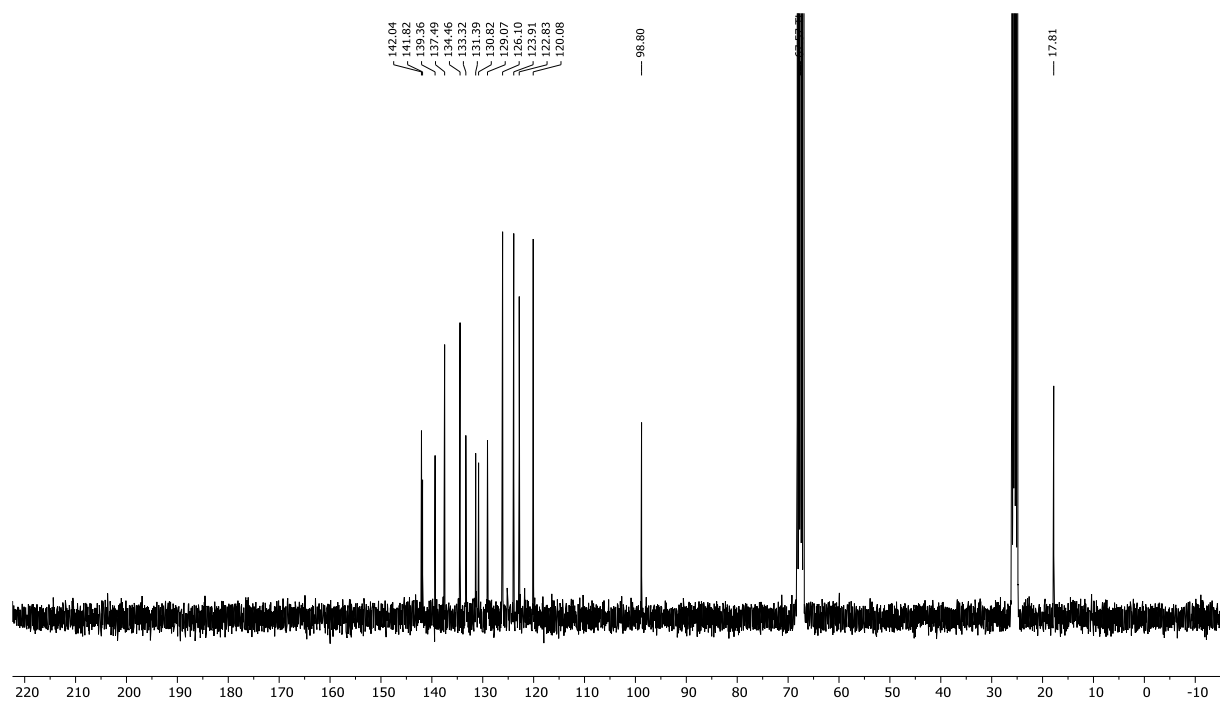

Figure 9.  $^{13}\text{C}$ - $\{^1\text{H}\}$ -NMR of BBTT **3d** (75 MHz,  $\text{THF-}d_8$ , 298 K).

2.1.1.5 6-(2-Methoxyphenyl)-6H-benzo[4,5]thieno[3,2-b]benzo[4,5]thieno[2,3-e][1,4]thiazine  
(**3e**)

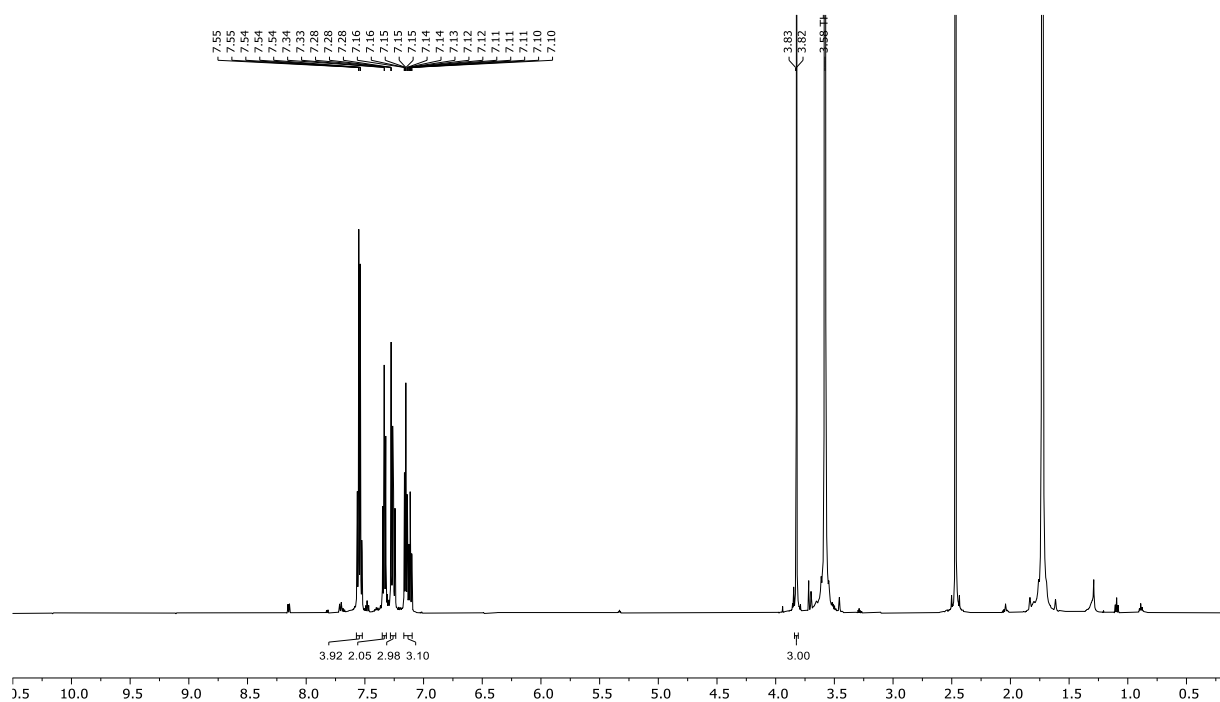

Figure 10.  $^1\text{H}$ -NMR of BBTT **3e** (300 MHz,  $\text{THF-}d_8$ , 298 K).

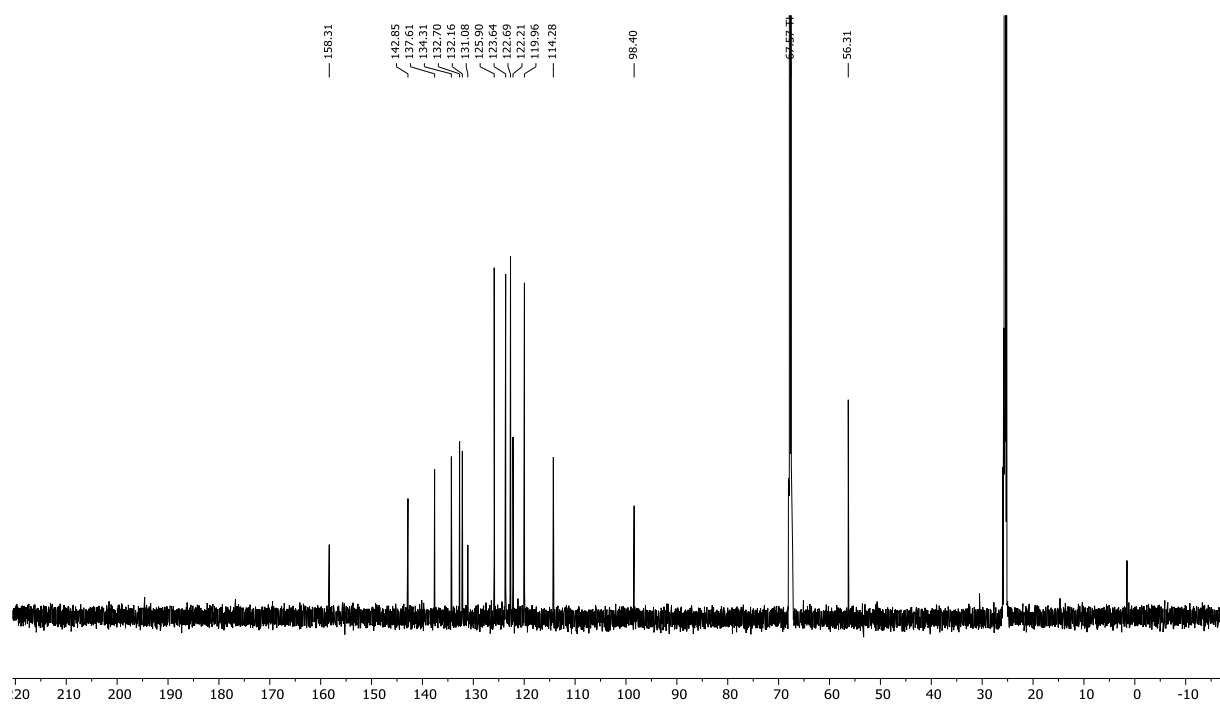

Figure 11.  $^{13}\text{C}\{-^1\text{H}\}$ -NMR of BBTT **3e** (75 MHz,  $\text{THF-}d_8$ , 298 K).

## 2.1.2 *Anti-anti-N-ortho,ortho'*-disubstituted-Phenyl-BBTT

### 2.1.2.1 2-(6*H*-benzo[4,5]thieno[3,2-*b*]benzo[4,5]thieno[2,3-*e*][1,4]thiazine-6-yl)isophthalonitrile (3f)

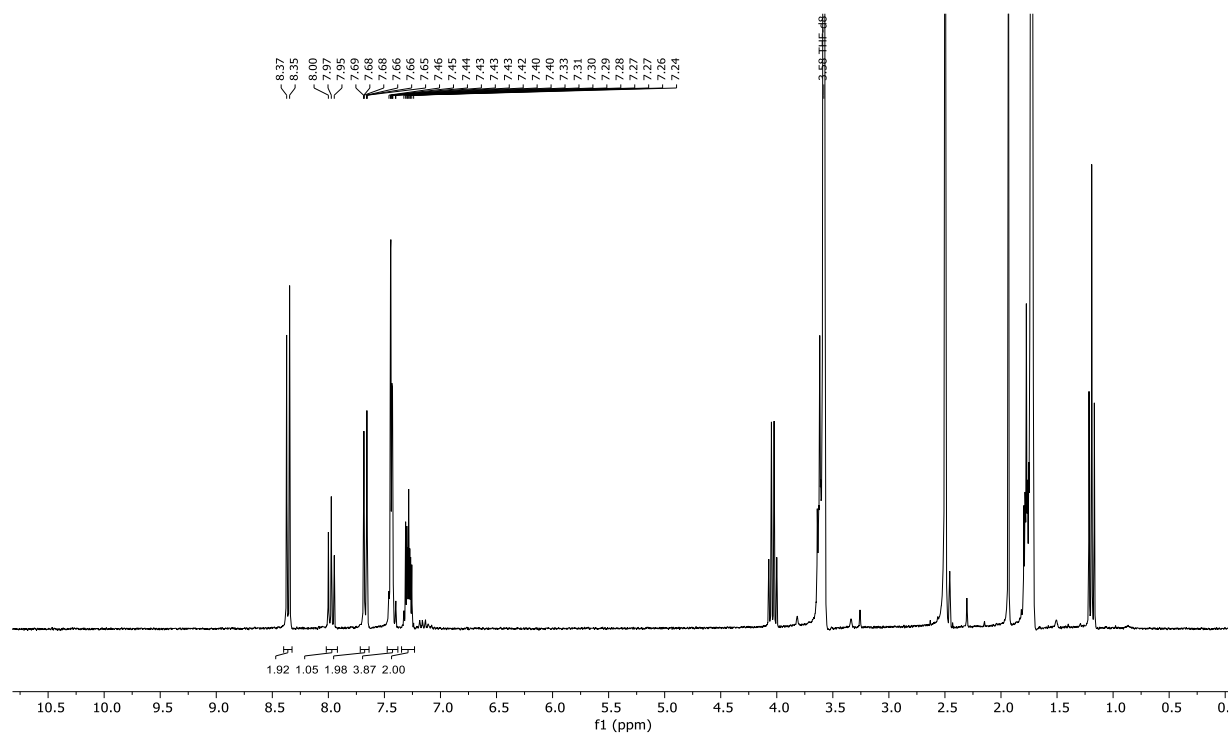

Figure 12.  $^1\text{H}$ -NMR of BBTT **3f** (300 MHz,  $\text{THF-}d_8$ , 298 K).

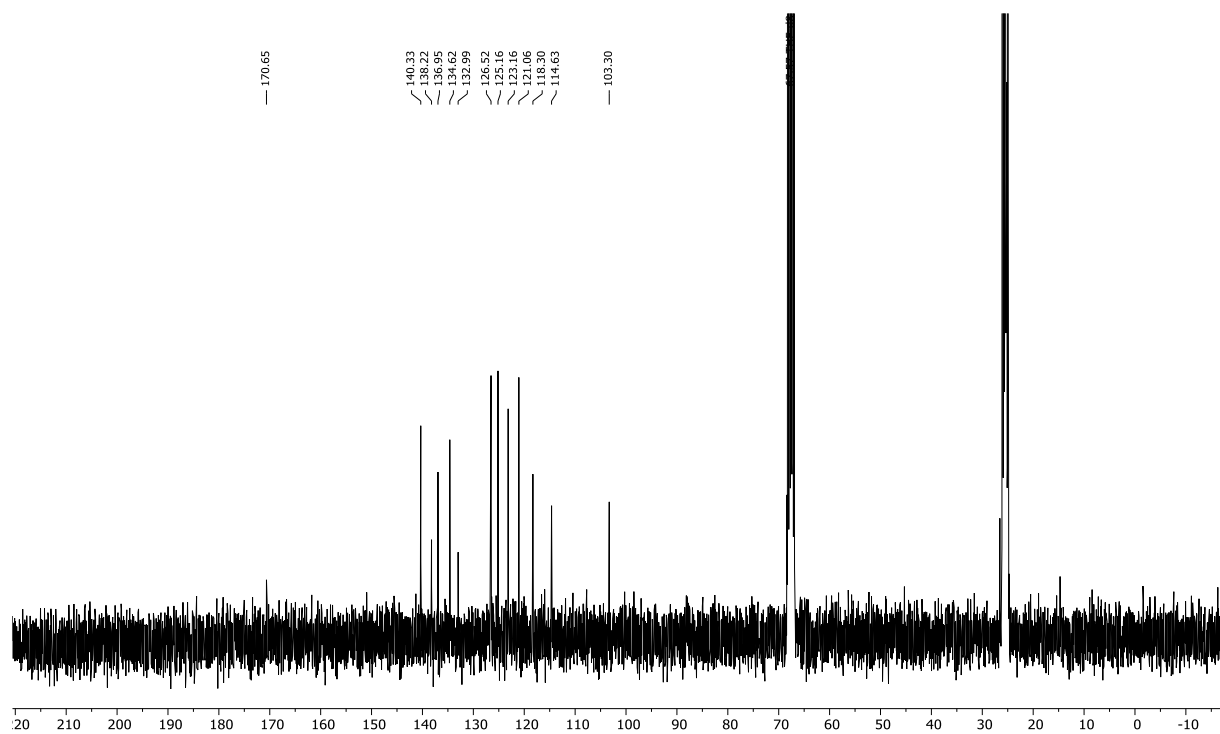

Figure 13.  $^{13}\text{C}\{-^1\text{H}\}$ -NMR of BBTT **3f** (75 MHz,  $\text{THF-}d_6$ , 298 K).

2.1.2.2 2-(6*H*-benzo[4,5]thieno[3,2-*b*]benzo[4,5]thieno[2,3-*e*][1,4]thiazin-6-yl)-3-chlorobenzonitrile (3k)

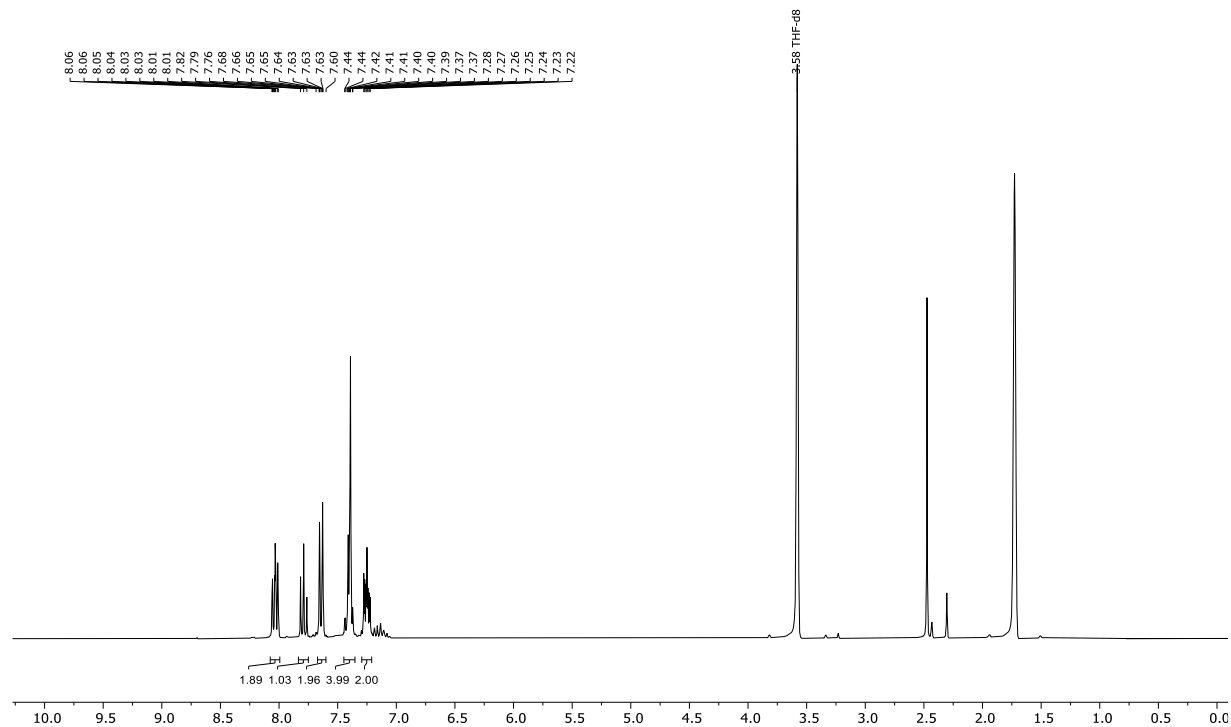

Figure 14.  $^1\text{H}$ -NMR of BBTT **3k** (300 MHz,  $\text{THF-}d_6$ , 298 K).

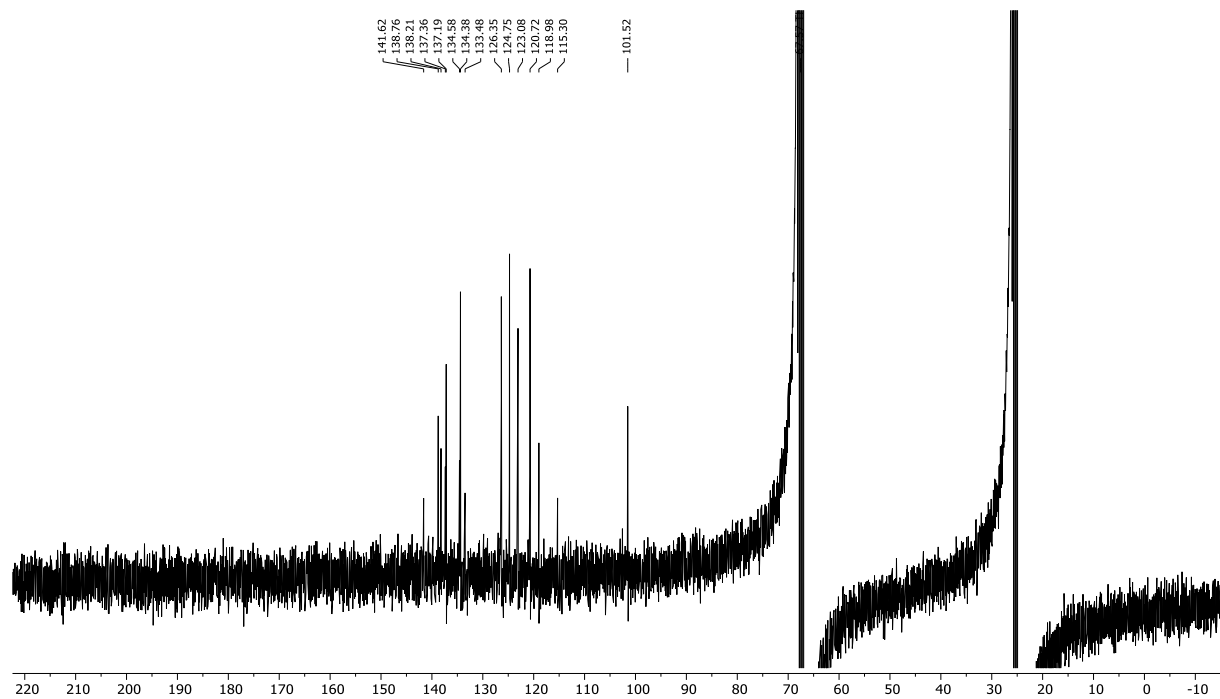

Figure 15.  $^{13}\text{C}\{-^1\text{H}\}$ -NMR of BBTT **3k** (75 MHz,  $\text{THF-}d_8$ , 298 K).

### 2.1.2.3 2-(6*H*-benzo[4,5]thieno[3,2-*b*]benzo[4,5]thieno[2,3-*e*][1,4]thiazine-6-yl)-3-fluorobenzonitrile (3l)

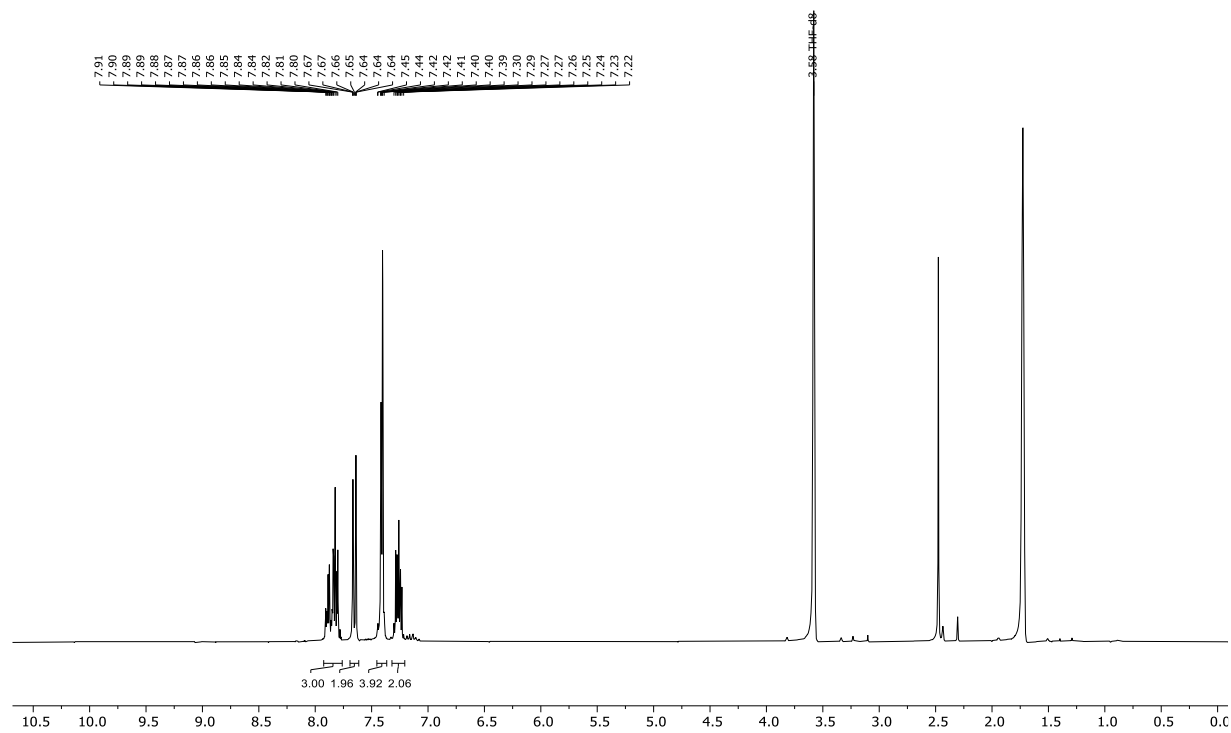

Figure 16.  $^1\text{H}$ -NMR of BBTT **3l** (300 MHz,  $\text{THF-}d_8$ , 298 K).

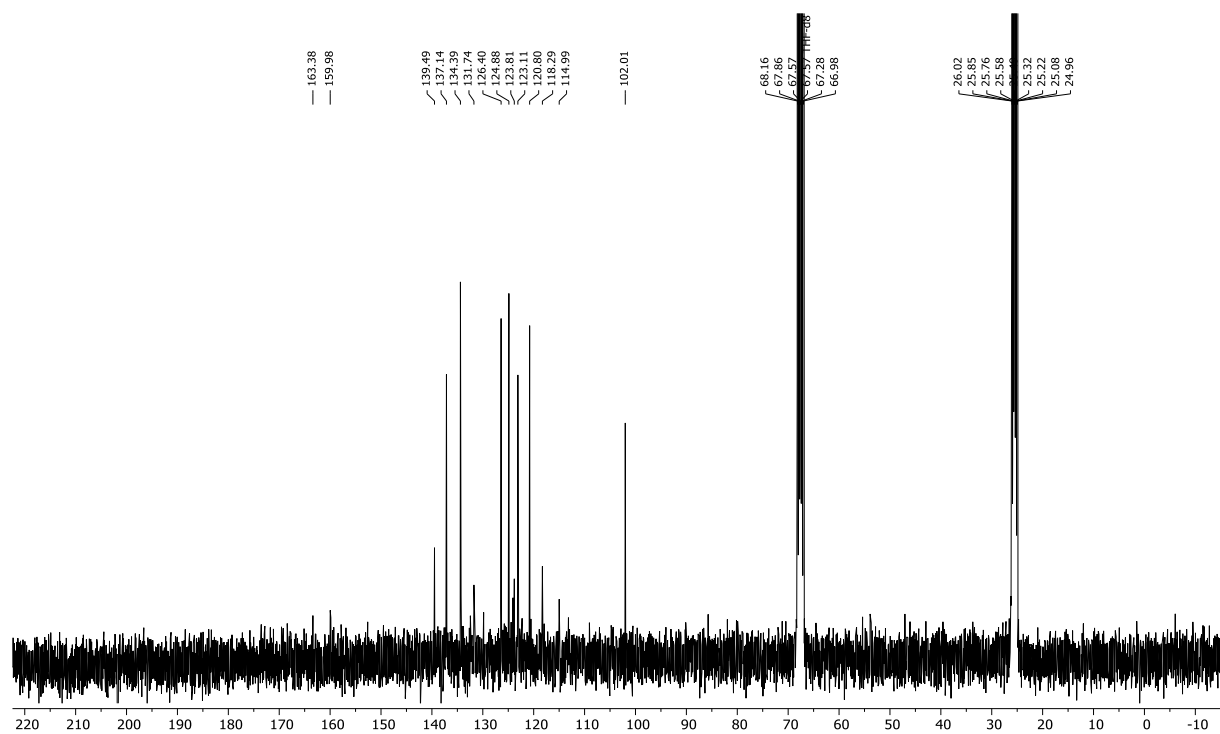

Figure 17.  $^{13}\text{C}\{-^1\text{H}\}$ -NMR of BBTT **3I** (75 MHz, THF- $d_8$ , 298 K).

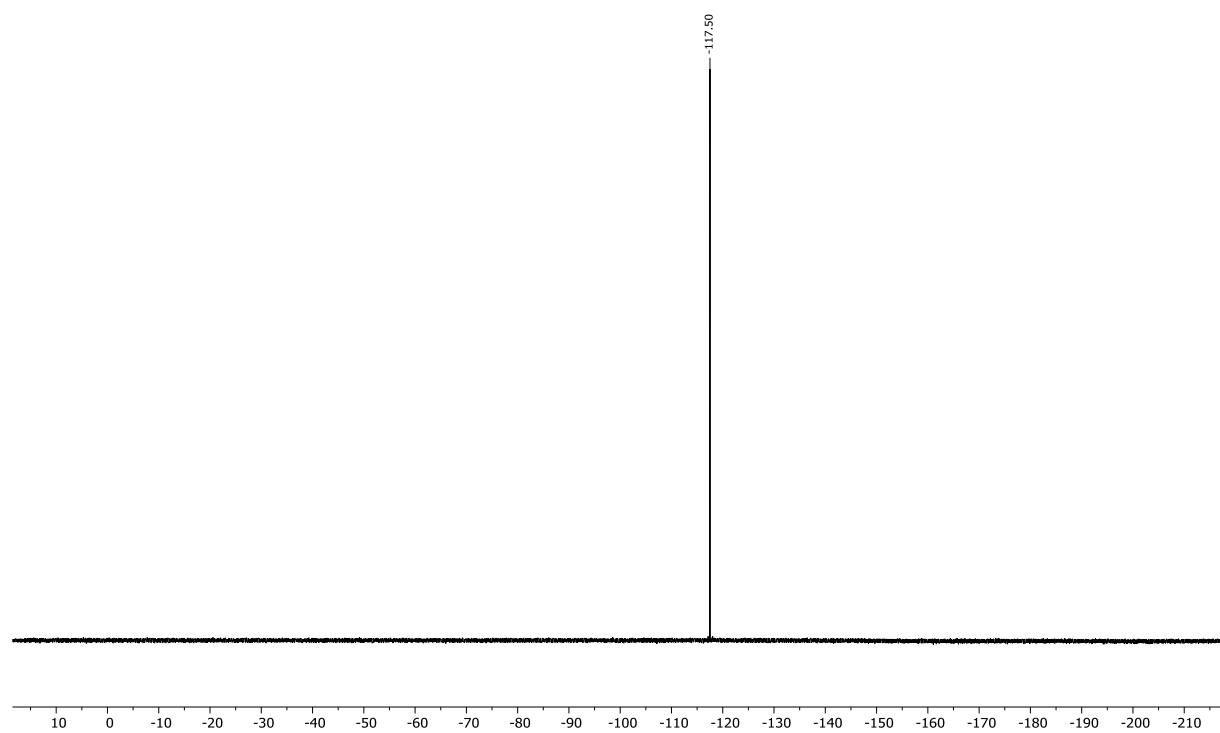

Figure 18.  $^{19}\text{F}$ -NMR of BBTT **3I** (282 MHz, THF- $d_8$ , 298 K).

2.1.2.4 2-(6H-benzo[4,5]thieno[3,2-b]benzo[4,5]thieno[2,3-e][1,4]thiazine-6-yl)-3-methylbenzonitrile (3m)

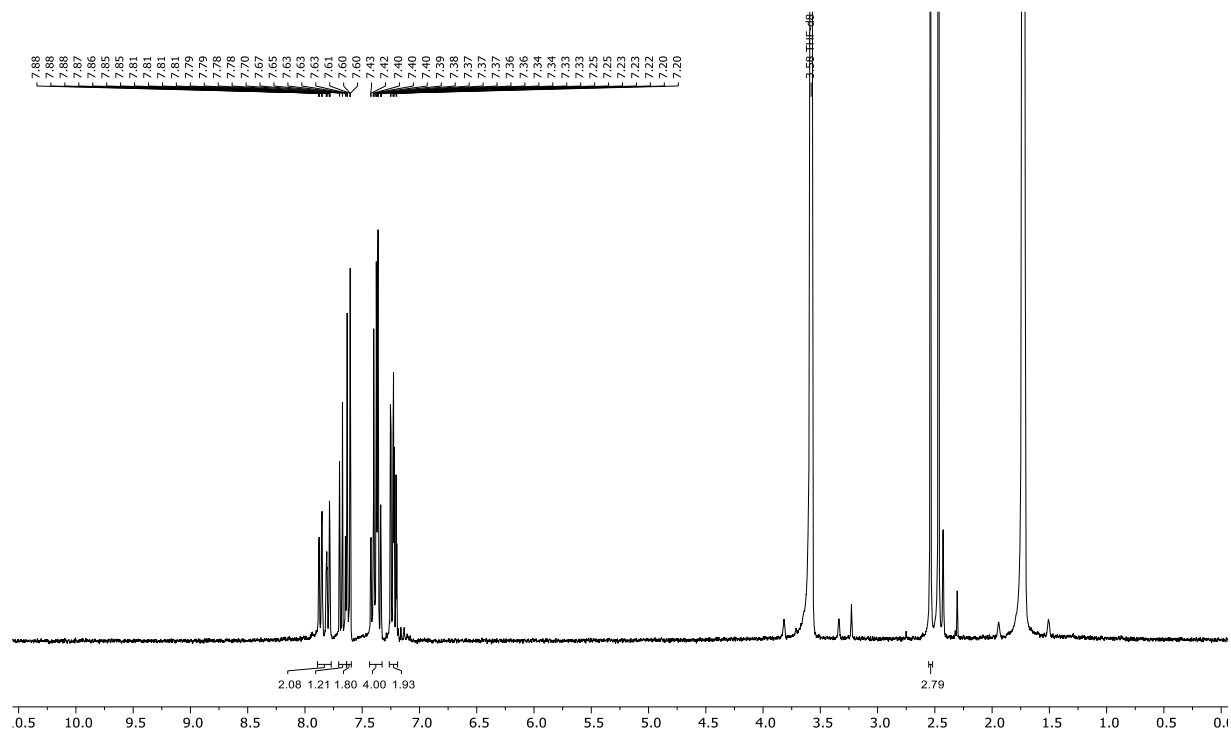

Figure 19.  $^1\text{H-NMR}$  of BBTT **3m** (300 MHz,  $\text{THF-}d_8$ , 298 K).

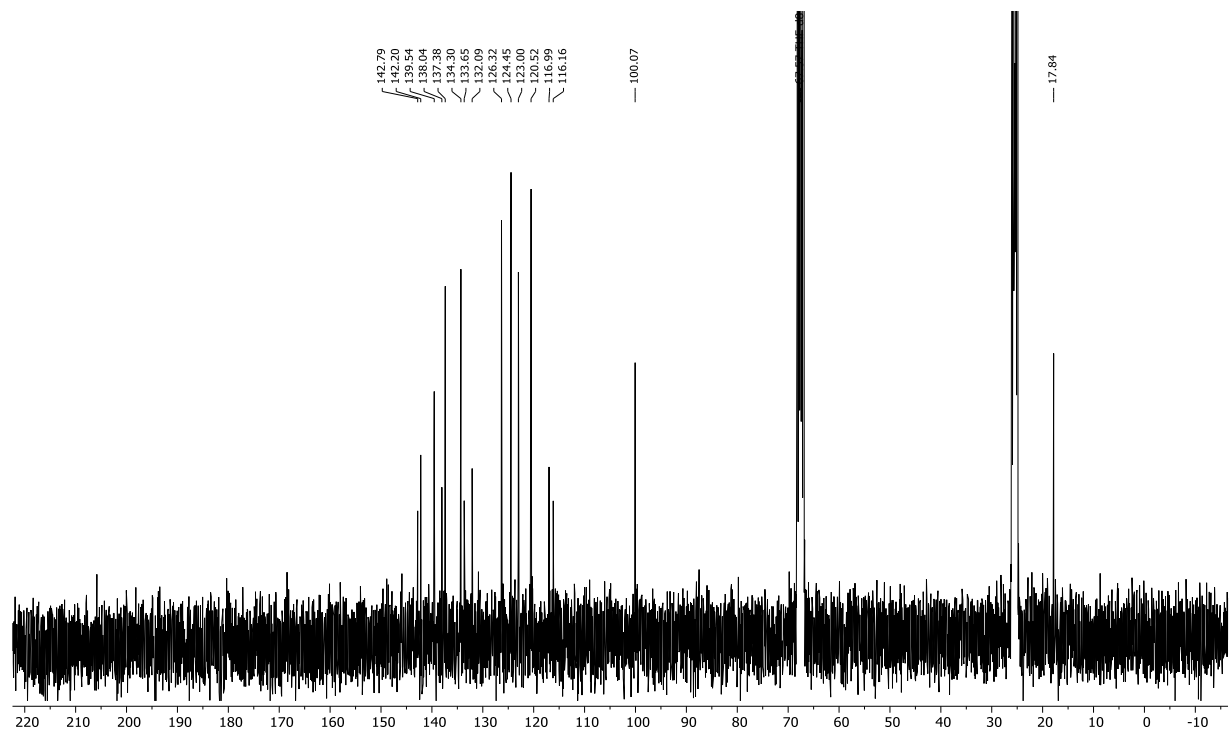

Figure 20.  $^{13}\text{C-}\{^1\text{H}\}$ -NMR of BBTT **3m** (75 MHz,  $\text{THF-}d_8$ , 298 K).

2.1.2.5 2-(6*H*-benzo[4,5]thieno[3,2-*b*]benzo[4,5]thieno[2,3-*e*][1,4]thiazin-6-yl)-3-methoxybenzonitrile (3n)

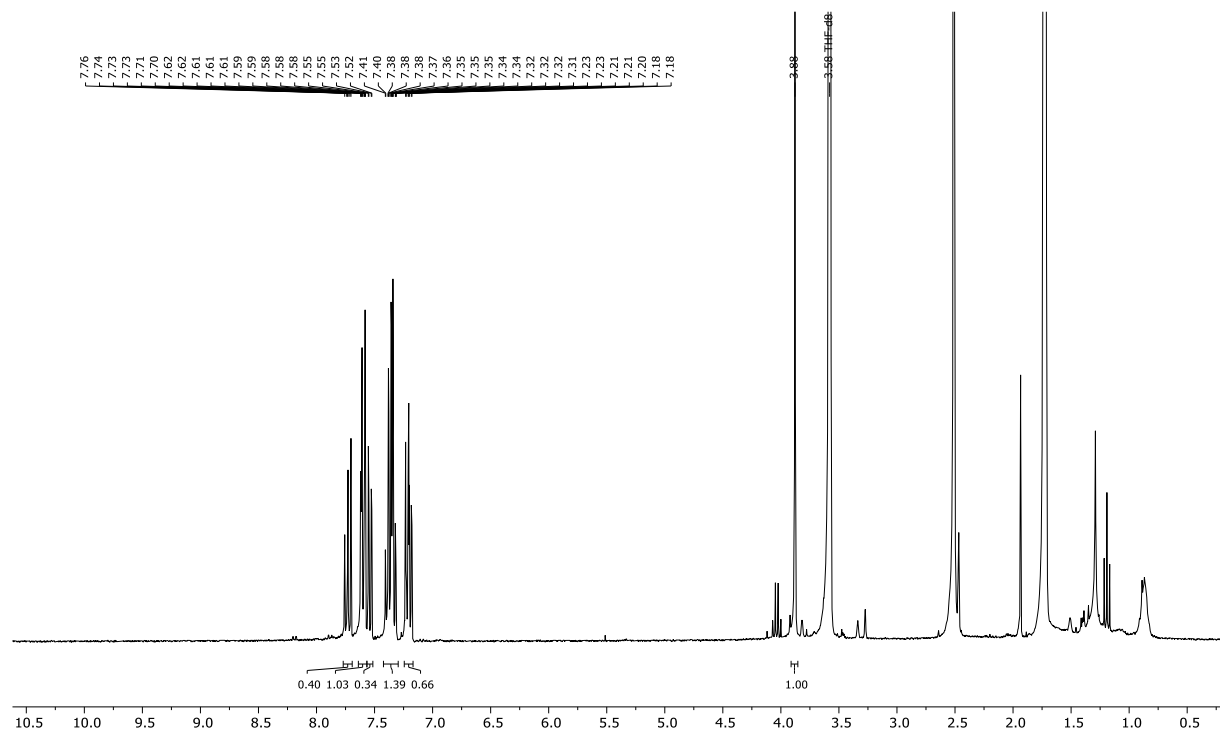

Figure 21.  $^1\text{H-NMR}$  of BBTT **3n** (300 MHz,  $\text{THF-}d_8$ , 298 K).

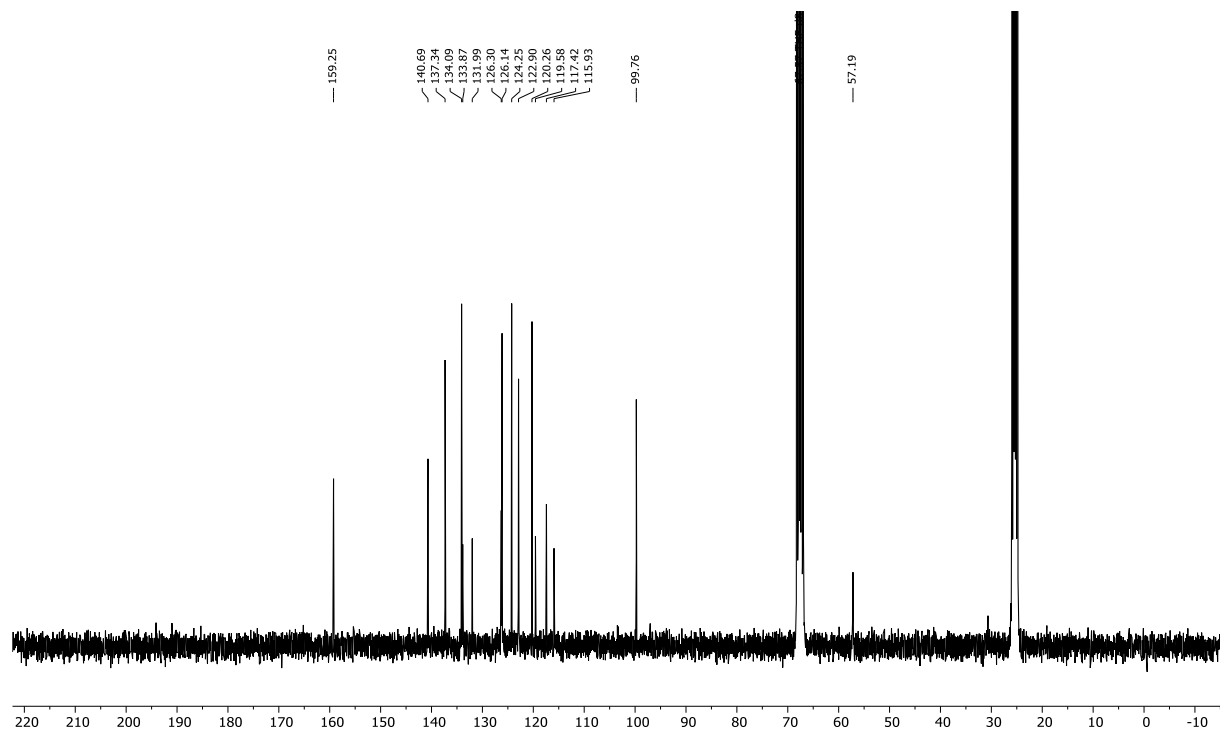

Figure 22.  $^{13}\text{C-}\{^1\text{H}\}$ -NMR of BBTT **3n** (75 MHz,  $\text{THF-}d_8$ , 298 K).



2.1.2.6 6-(2,6-Chlorophenyl)-6H-benzo[4,5]thieno[3,2-b]benzo[4,5]thieno[2,3-e][1,4]thiazine  
(3g)

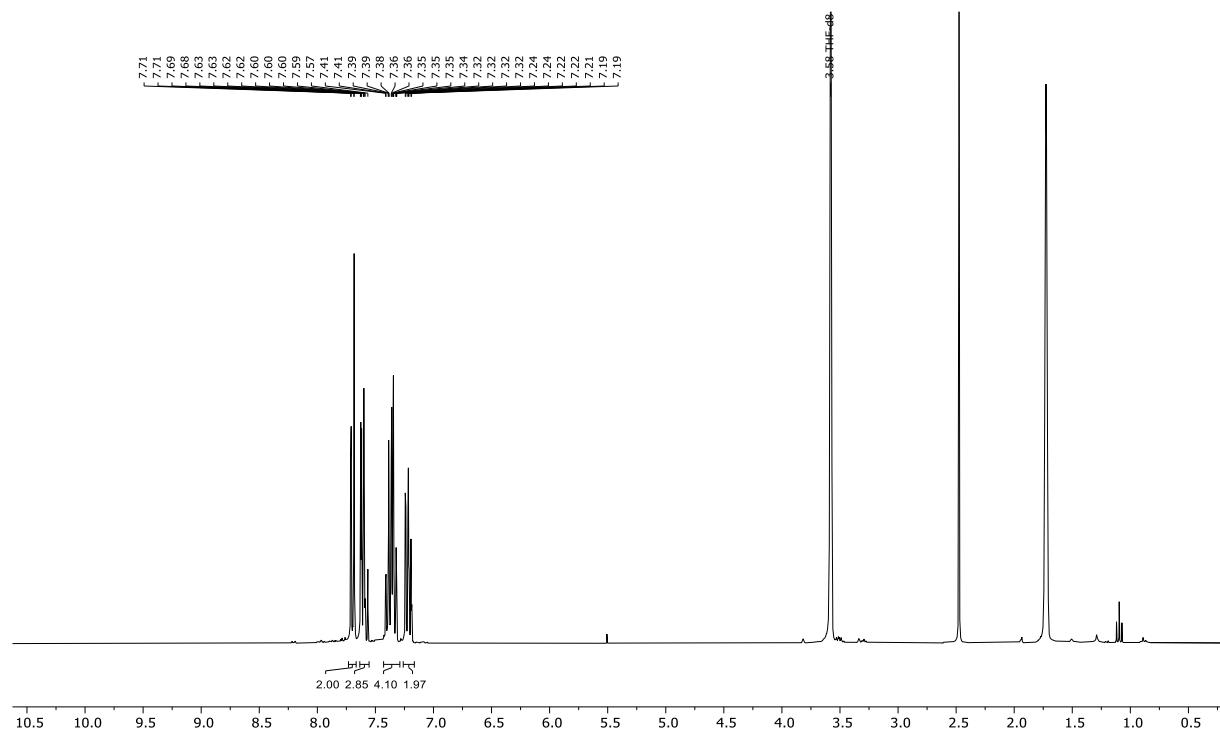

Figure 23.  $^1\text{H-NMR}$  of BBTT **3g** (300 MHz, THF- $d_8$ , 298 K).

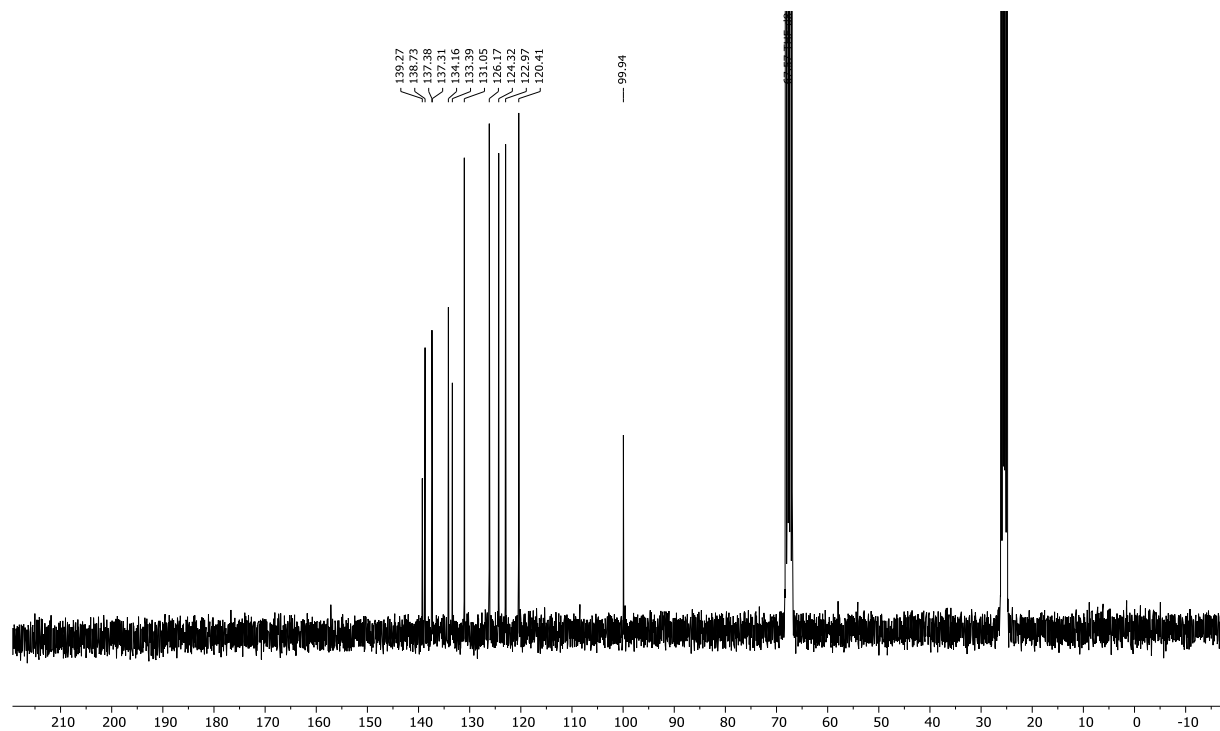

Figure 24.  $^{13}\text{C}\{-^1\text{H}\}$ -NMR of BBTT **3g** (75 MHz, THF- $d_8$ , 298 K).

2.1.2.7 6-(2-Chloro-6-fluorophenyl)-6H-benzo[4,5]thieno[3,2-b]benzo[4,5]thieno[2,3-e][1,4]thiazine (3o)

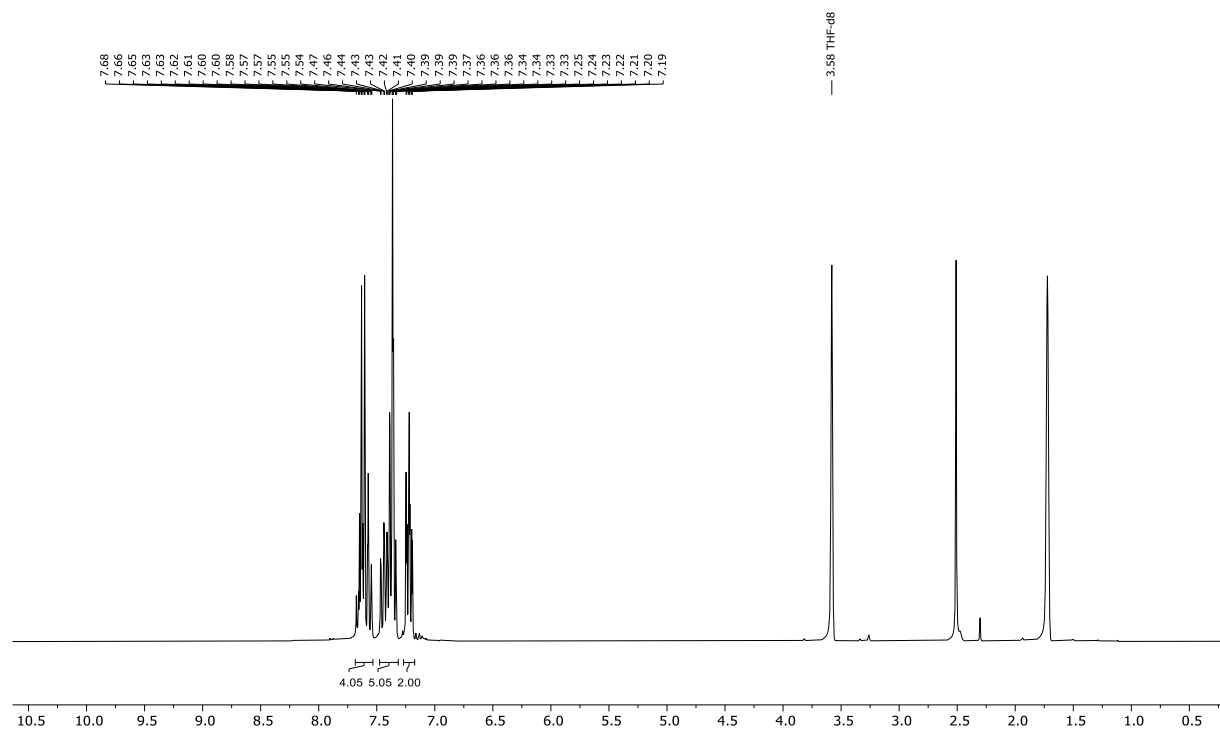

Figure 25.  $^1\text{H-NMR}$  of BBTT **3o** (300 MHz, THF- $d_8$ , 298 K).

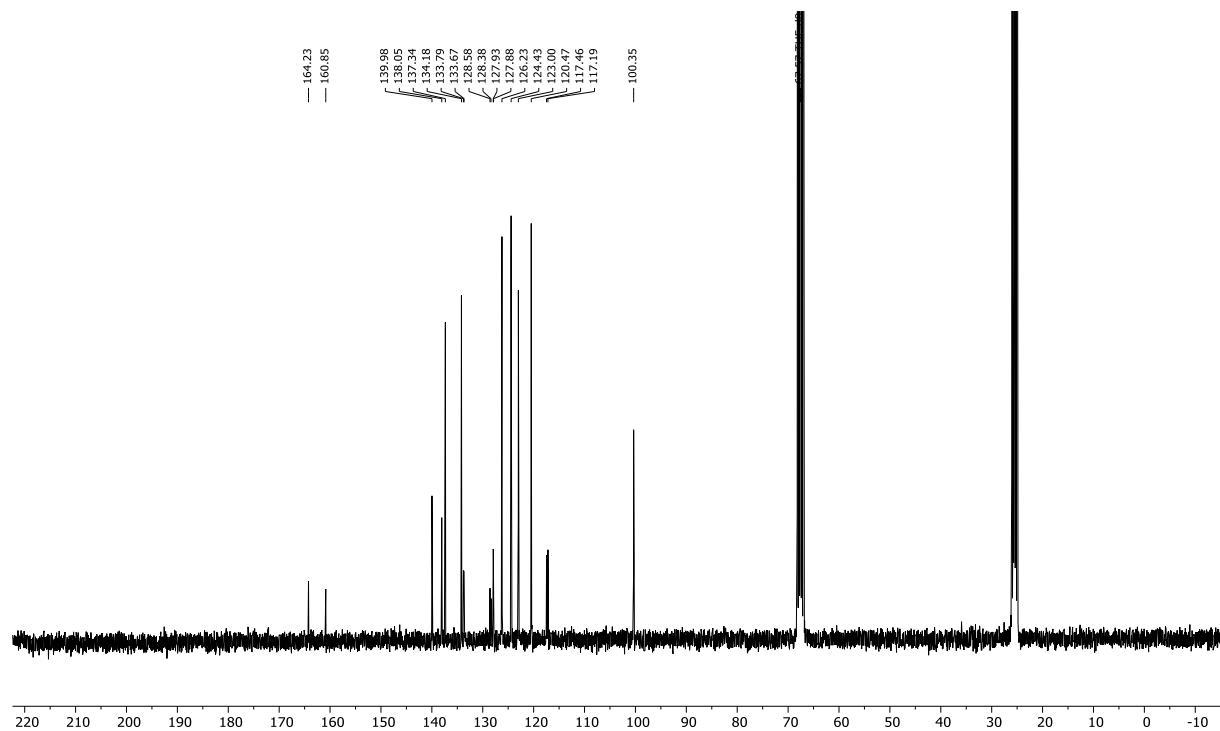

Figure 26.  $^{13}\text{C-}\{^1\text{H}\}$ -NMR of BBTT **3o** (75 MHz, THF- $d_8$ , 298 K).

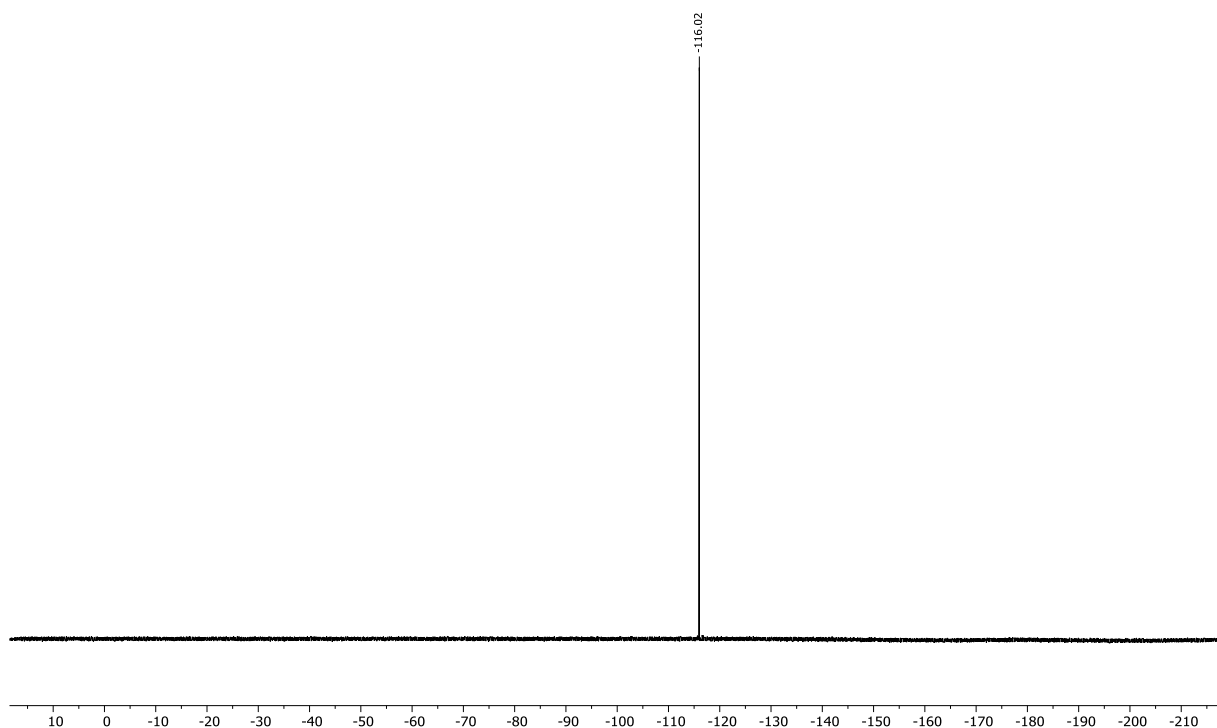

Figure 27.  $^{19}\text{F}$ -NMR of BBTT **3o** (282 MHz,  $\text{THF-}d_6$ , 298 K).

2.1.2.8 6-(2-chloro-6-methylphenyl)-6*H*-benzo[4,5]thieno-[3,2-*b*]benzo[4,5]thieno[2,3-*e*][1,4]thiazine (3p)

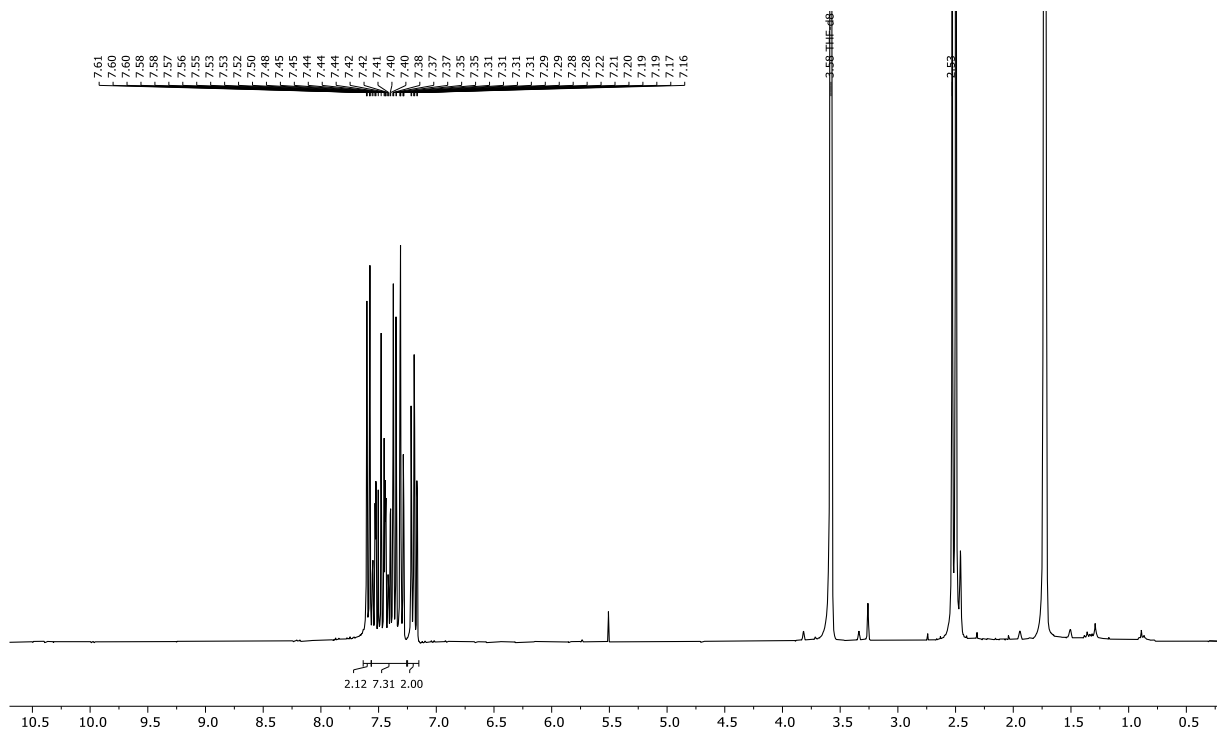

Figure 28.  $^1\text{H}$ -NMR of BBTT **3p** (300 MHz,  $\text{THF-}d_6$ , 298 K).

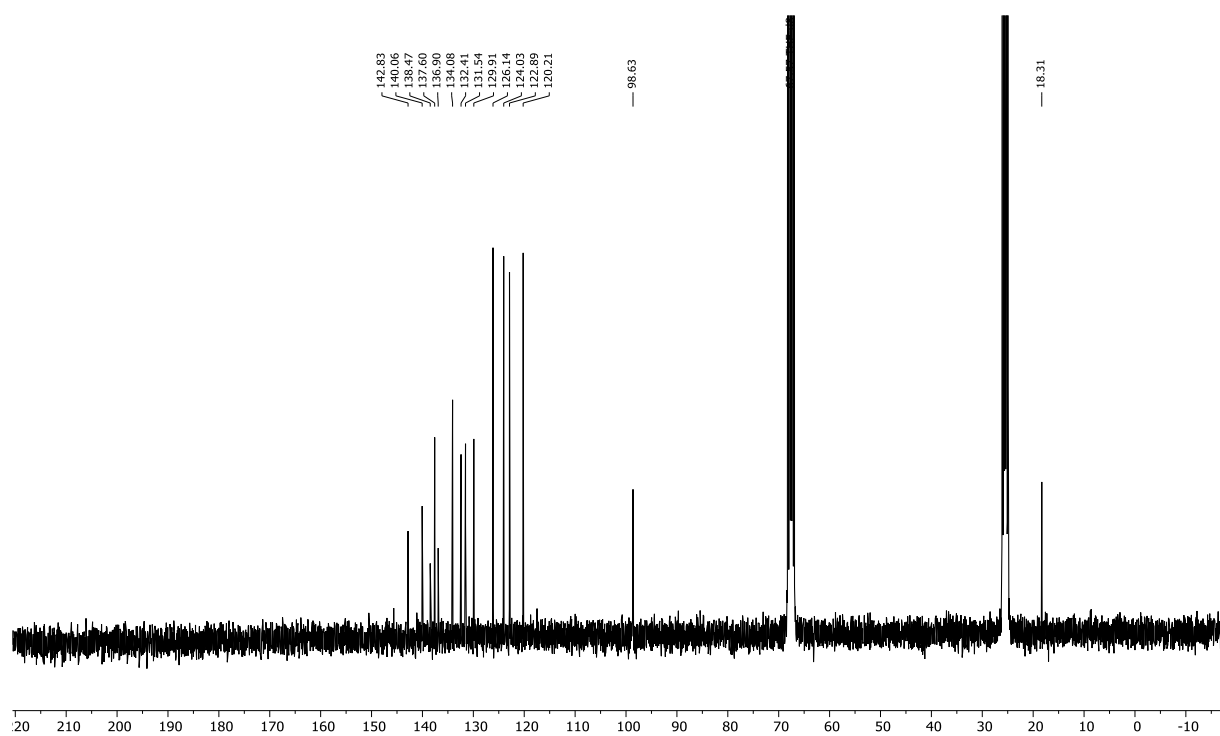

Figure 29.  $^{13}\text{C}\{-^1\text{H}\}$ -NMR of BBTT **3p** (75 MHz,  $\text{THF-}d_8$ , 298 K).

2.1.2.9 6-(2-Chloro-6-methoxyphenyl)-6H-benzo[4,5]thieno[3,2-*b*]benzo[4,5]thieno[2,3-*e*][1,4]thiazine (3q)

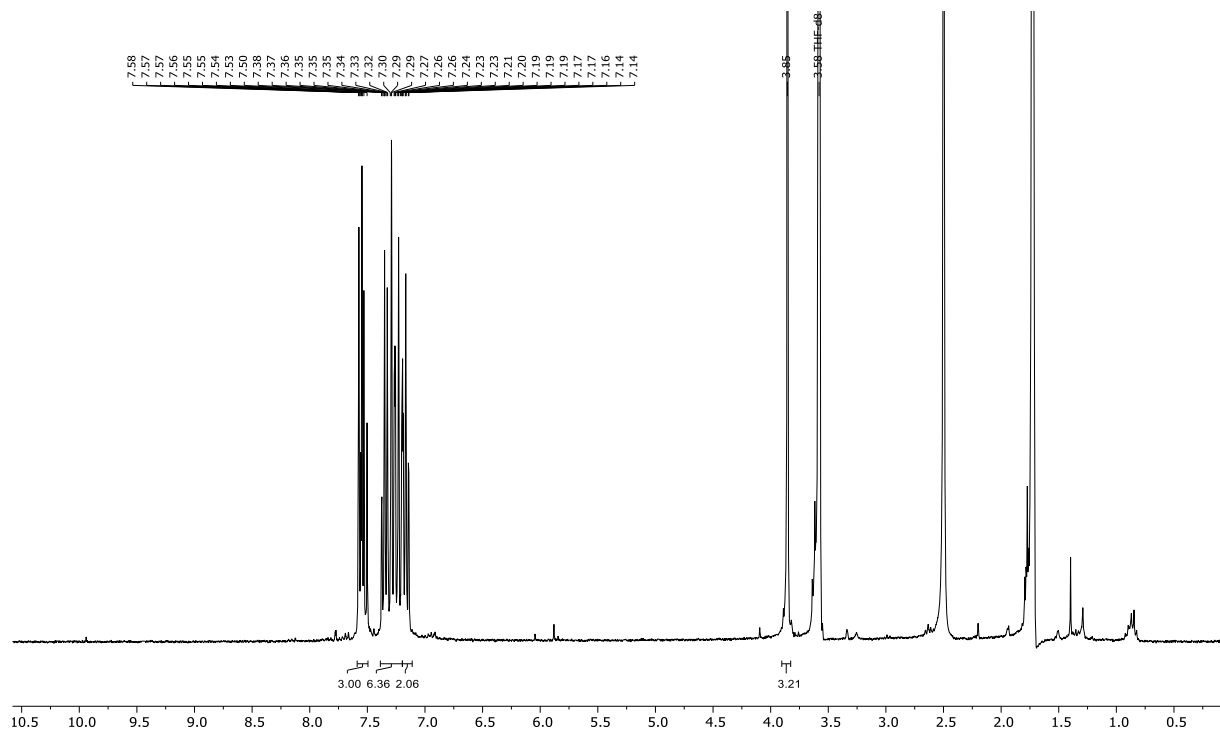

Figure 30.  $^1\text{H}$ -NMR of BBTT **3q** (300 MHz,  $\text{THF-}d_8$ , 298 K).

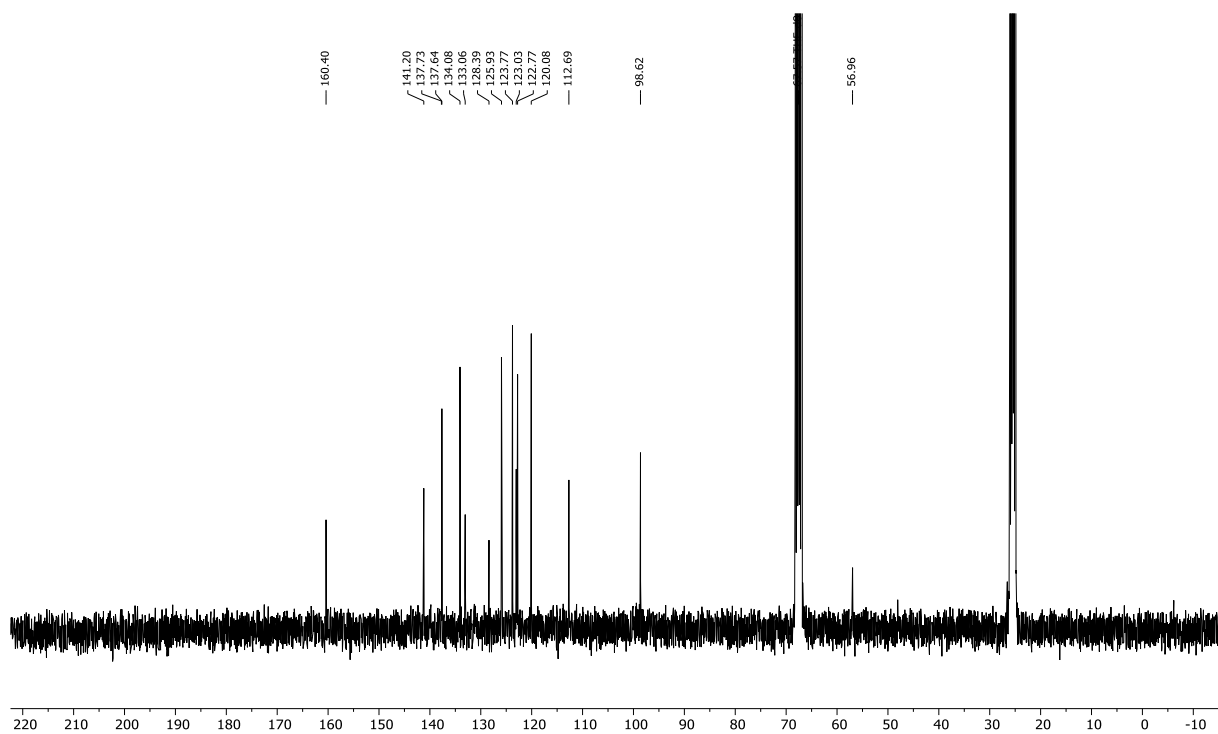

Figure 31.  $^{13}\text{C}\{-^1\text{H}\}$ -NMR of BBTT **3q** (75 MHz,  $\text{THF-}d_8$ , 298 K).

2.1.2.10 6-(2,6-Fluorophenyl)-6H-benzo[4,5]thieno[3,2-b]benzo[4,5] thieno[2,3-e][1,4]thiazine  
(**3h**)

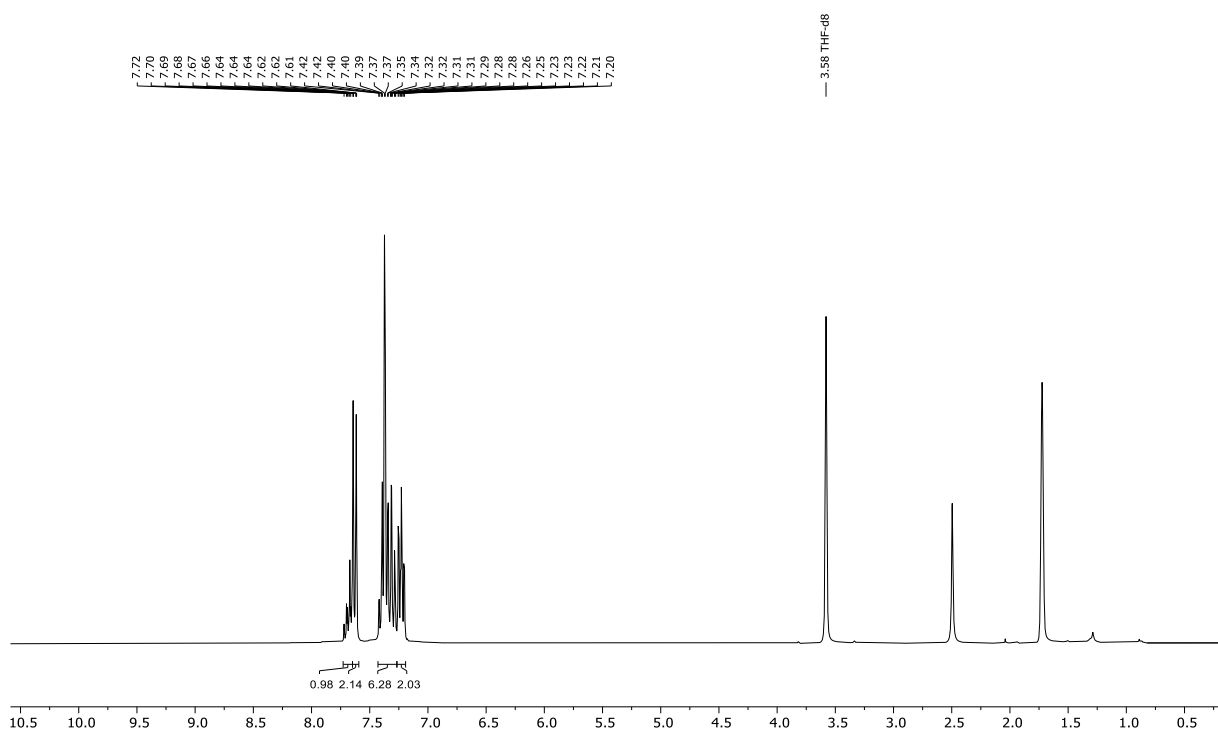

Figure 32.  $^1\text{H}$ -NMR of BBTT **3h** (300 MHz,  $\text{THF-}d_8$ , 298 K).

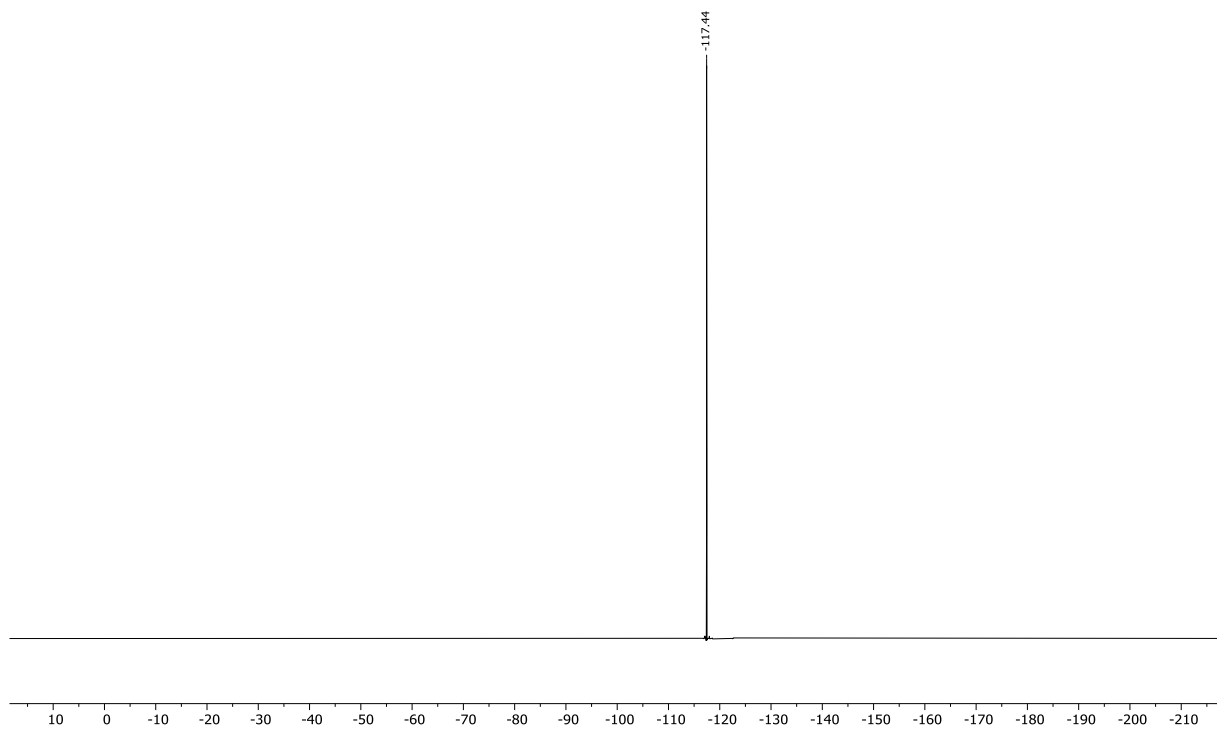

Figure 33. <sup>19</sup>F-NMR of BBTT **3h** (282 MHz, THF-*d*<sub>6</sub>, 298 K).

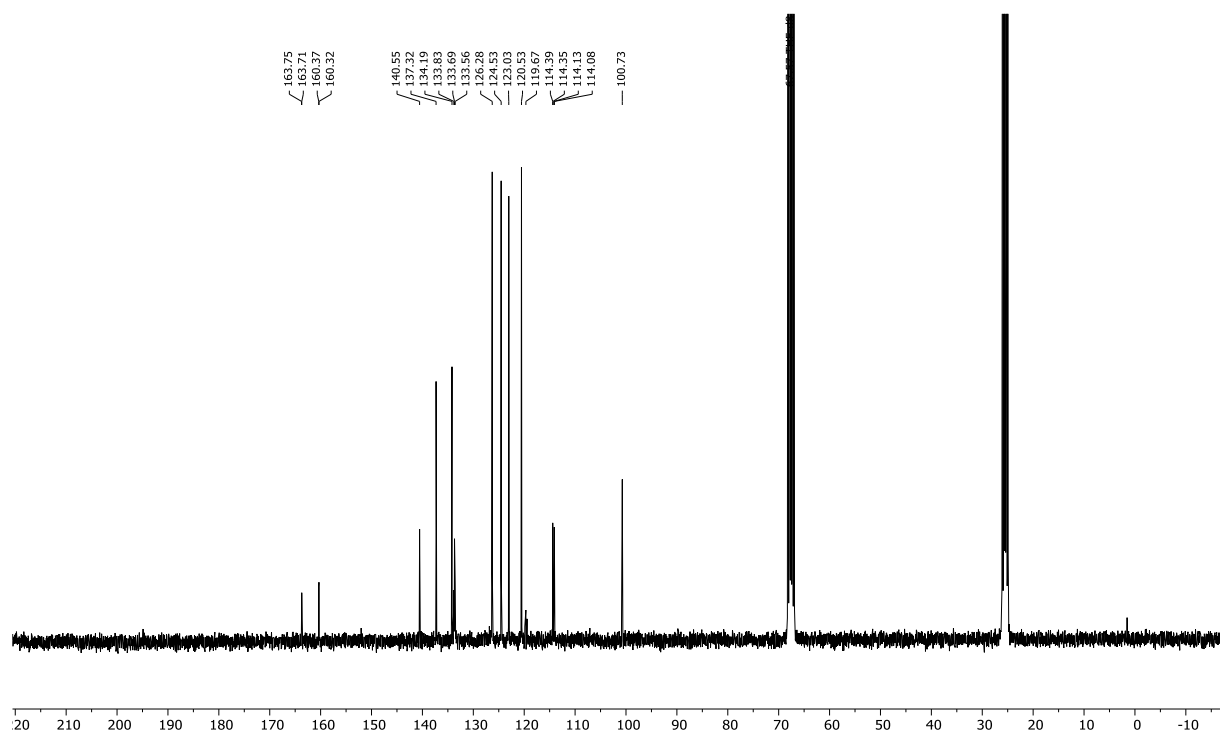

Figure 34. <sup>13</sup>C-<sup>1</sup>H-NMR of BBTT **3h** (75 MHz, THF-*d*<sub>6</sub>, 298 K).

2.1.2.11 6-(2-fluoro-6-methylphenyl)-6H-benzo[4,5]thieno[3,2-b]benzo[4,5]thieno[2,3-e][1,4]thiazine (3r)

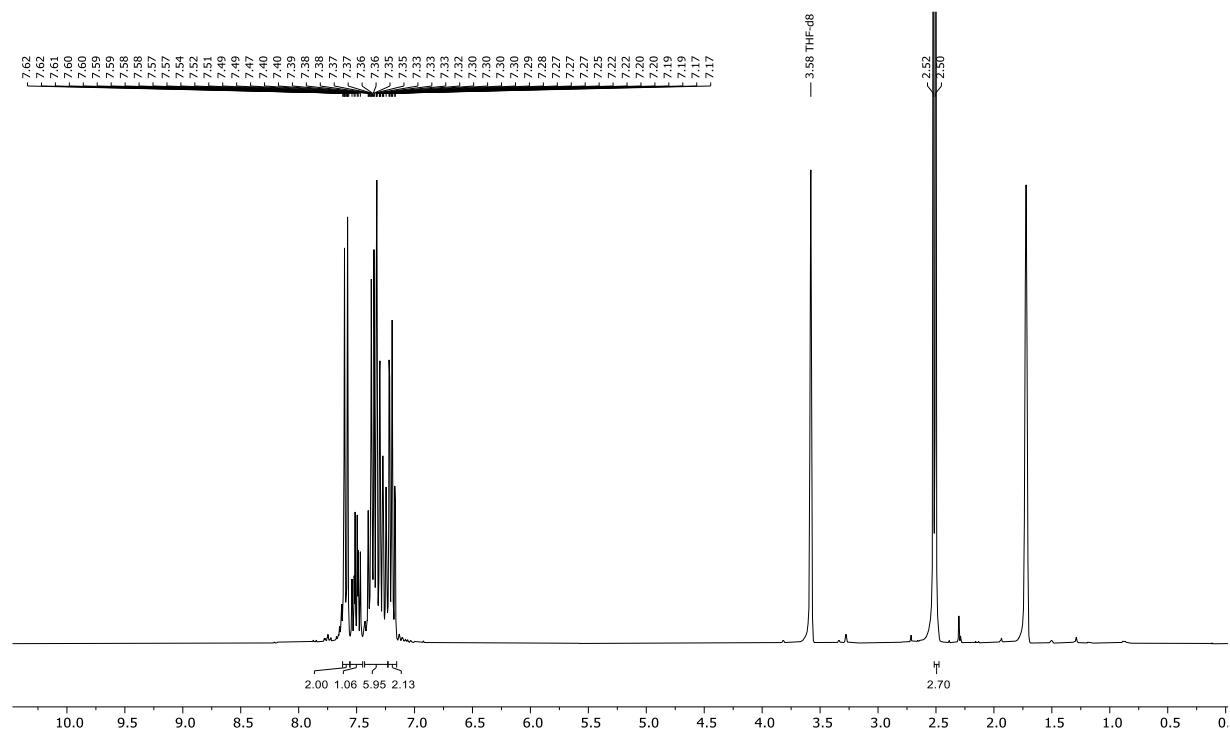

Figure 35.  $^1\text{H-NMR}$  of BBTT **3r** (300 MHz,  $\text{THF-d}_8$ , 298 K).

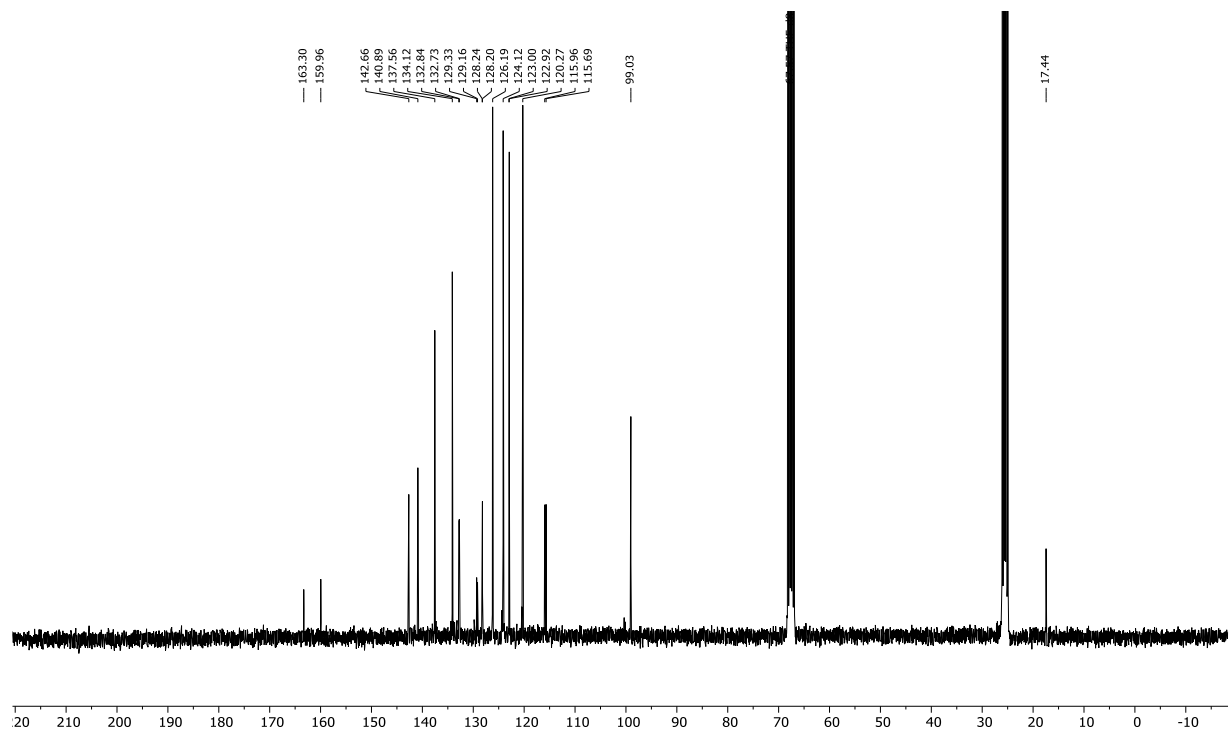

Figure 36.  $^{13}\text{C-}\{^1\text{H}\}$ -NMR of BBTT **3r** (75 MHz,  $\text{THF-d}_8$ , 298 K).

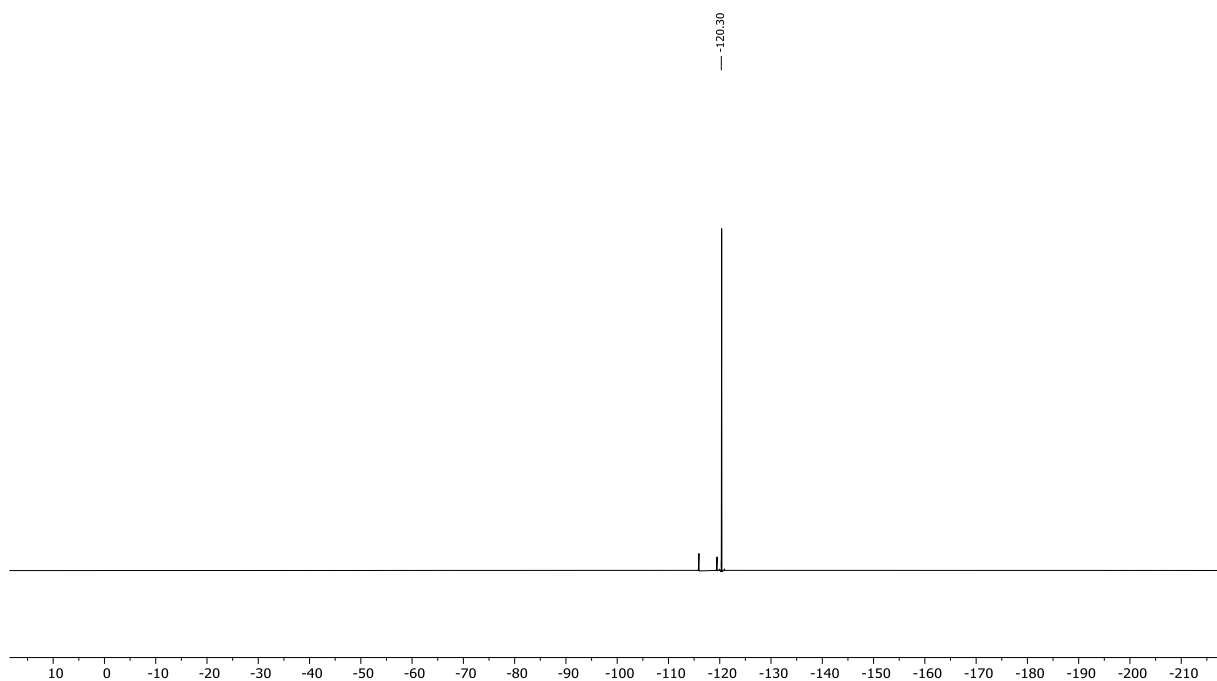

Figure 37.  $^{19}\text{F}$ -NMR of BBTT **3r** (282 MHz,  $\text{THF-}d_8$ , 298 K).

2.1.2.12 6-(2-Fluoro-6-methoxyphenyl)-6H-benzo[4,5]thieno[3,2-b]benzo[4,5]thieno[2,3-e][1,4]thiazine (3s)

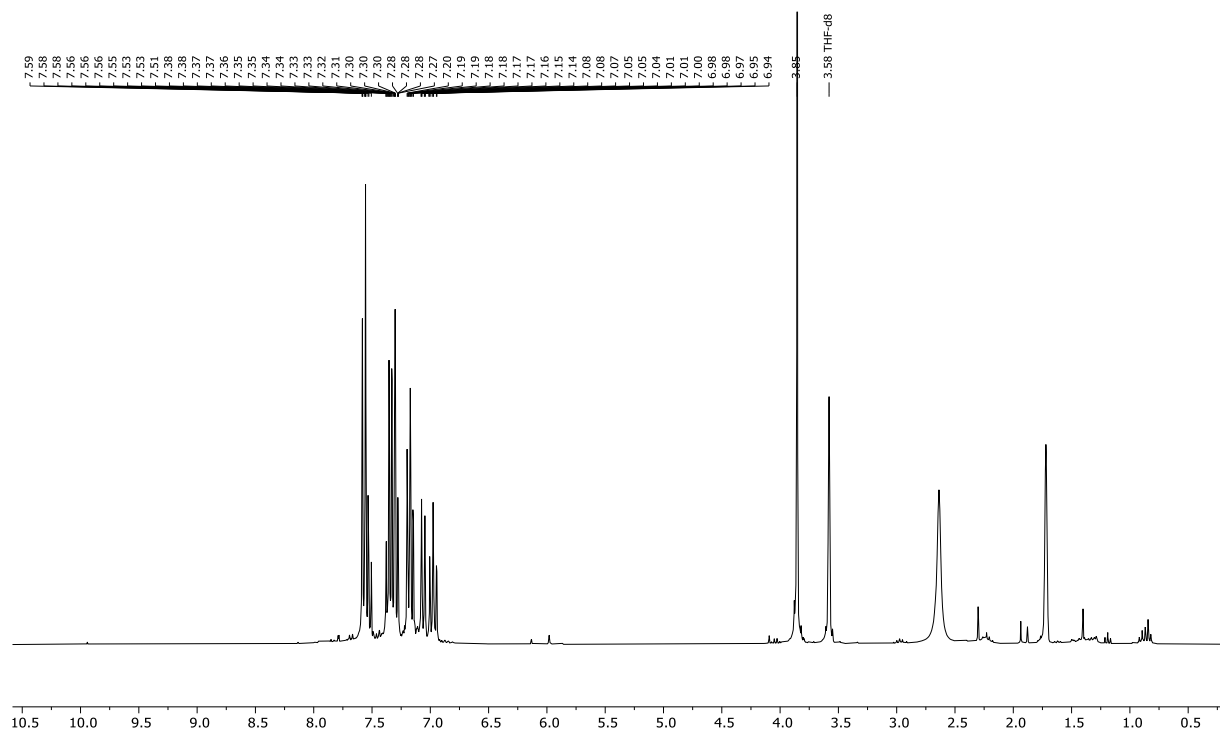

Figure 38.  $^1\text{H}$ -NMR of BBTT **3s** (300 MHz,  $\text{THF-}d_8$ , 298 K).



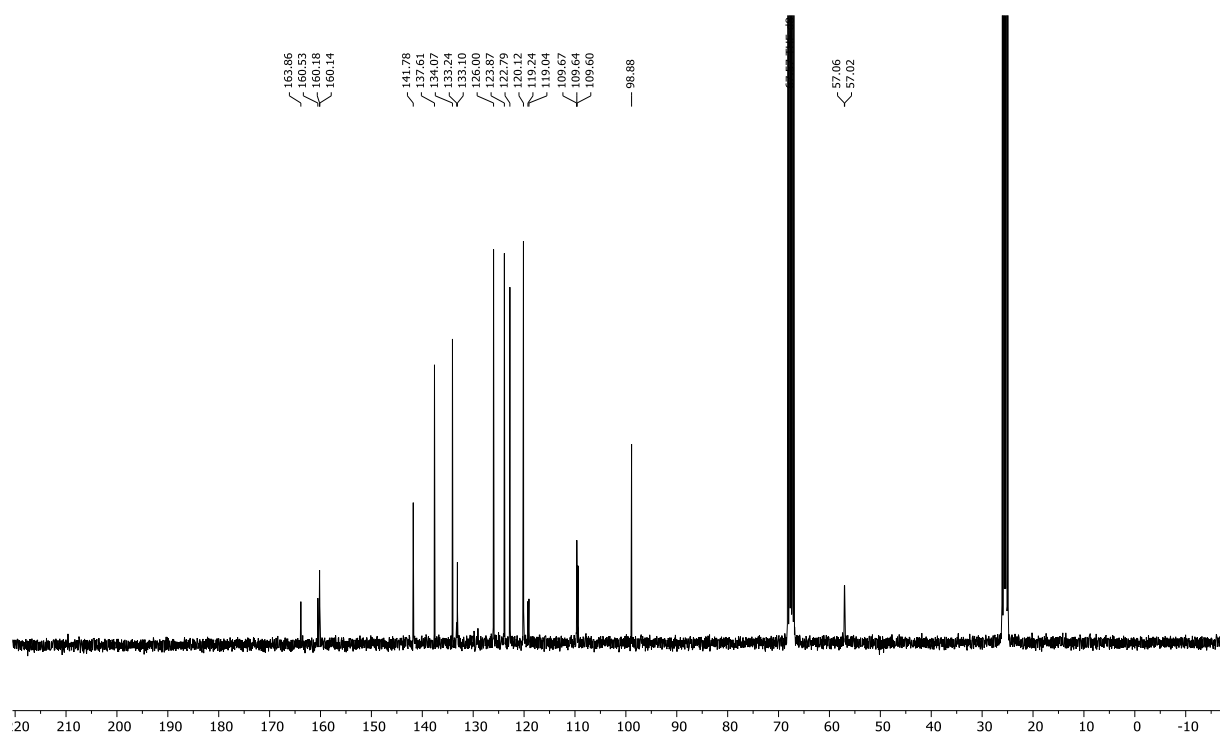

Figure 39.  $^{13}\text{C}\{-^1\text{H}\}$ -NMR of BBTT **3s** (75 MHz, THF- $d_6$ , 298 K).

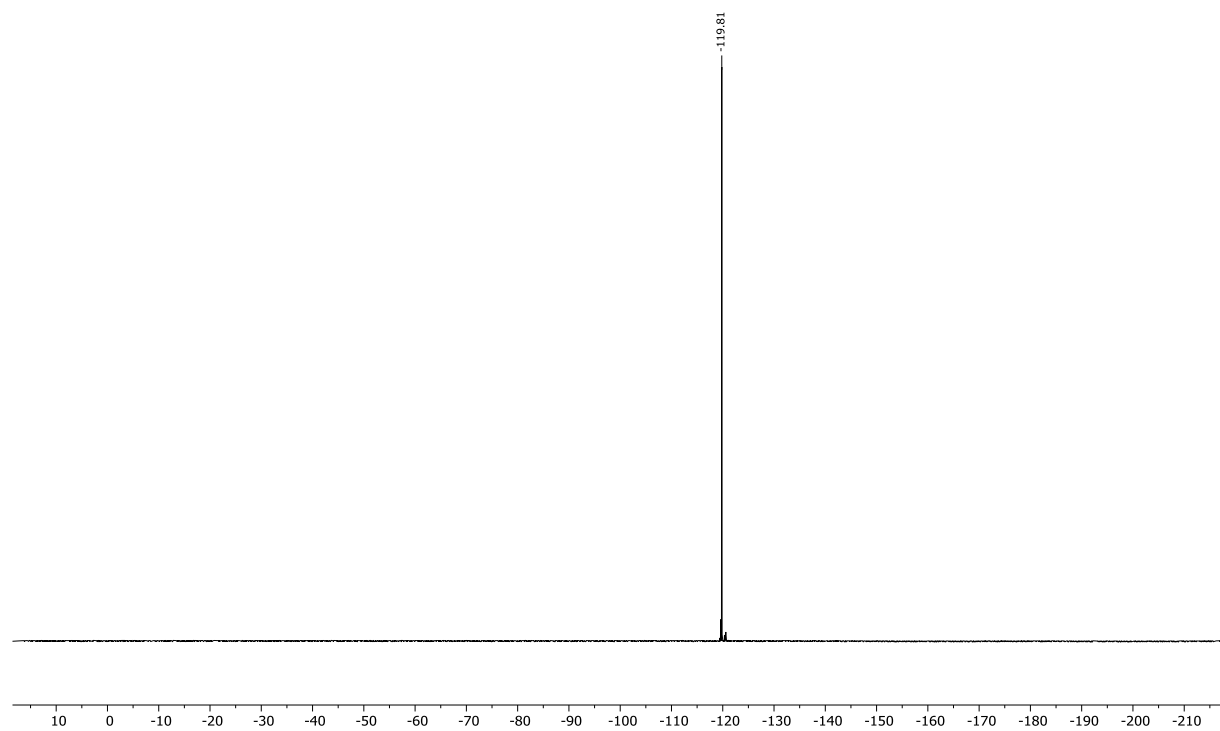

Figure 40.  $^{19}\text{F}$ -NMR of BBTT **3s** (282 MHz, THF- $d_6$ , 298 K).

2.1.2.13 6-(2,6-dimethylphenyl)-6H-benzo[4,5]thieno[3,2-b]benzo[4,5]thieno[2,3-e][1,4]thiazine (3i)

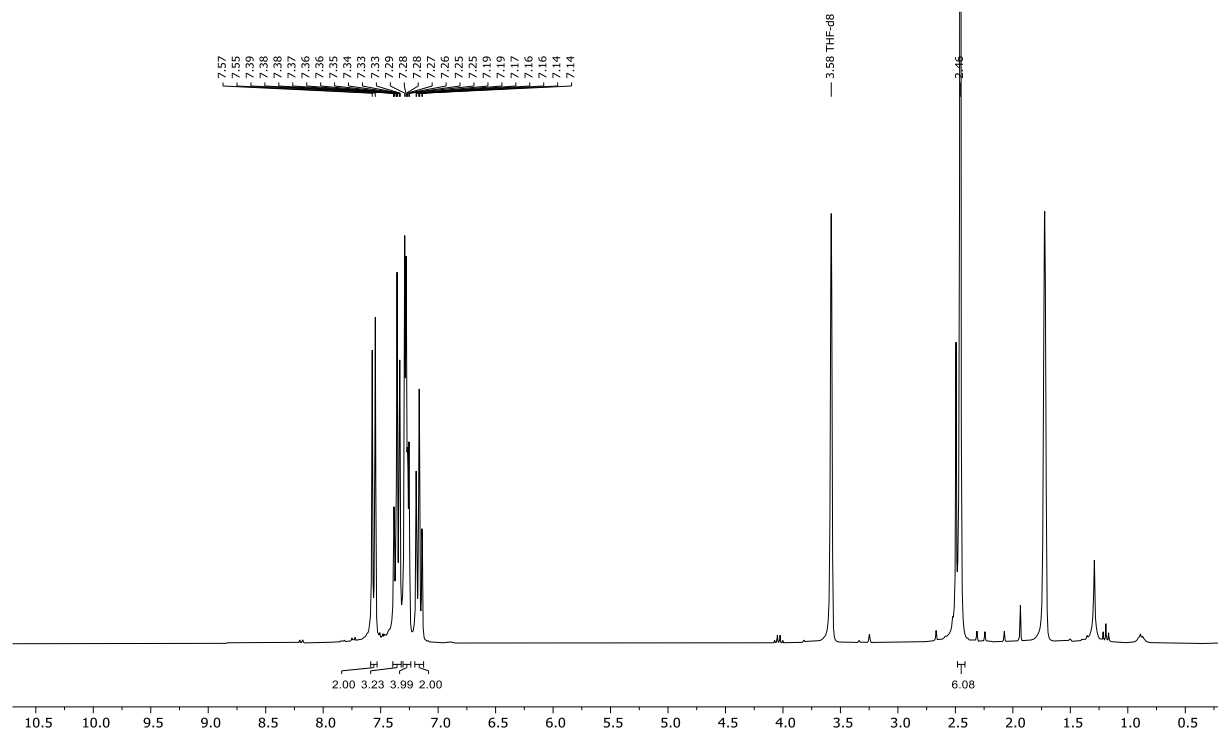

Figure 41.  $^1\text{H-NMR}$  of BBTT **3i** (300 MHz,  $\text{THF-d}_8$ , 298 K).

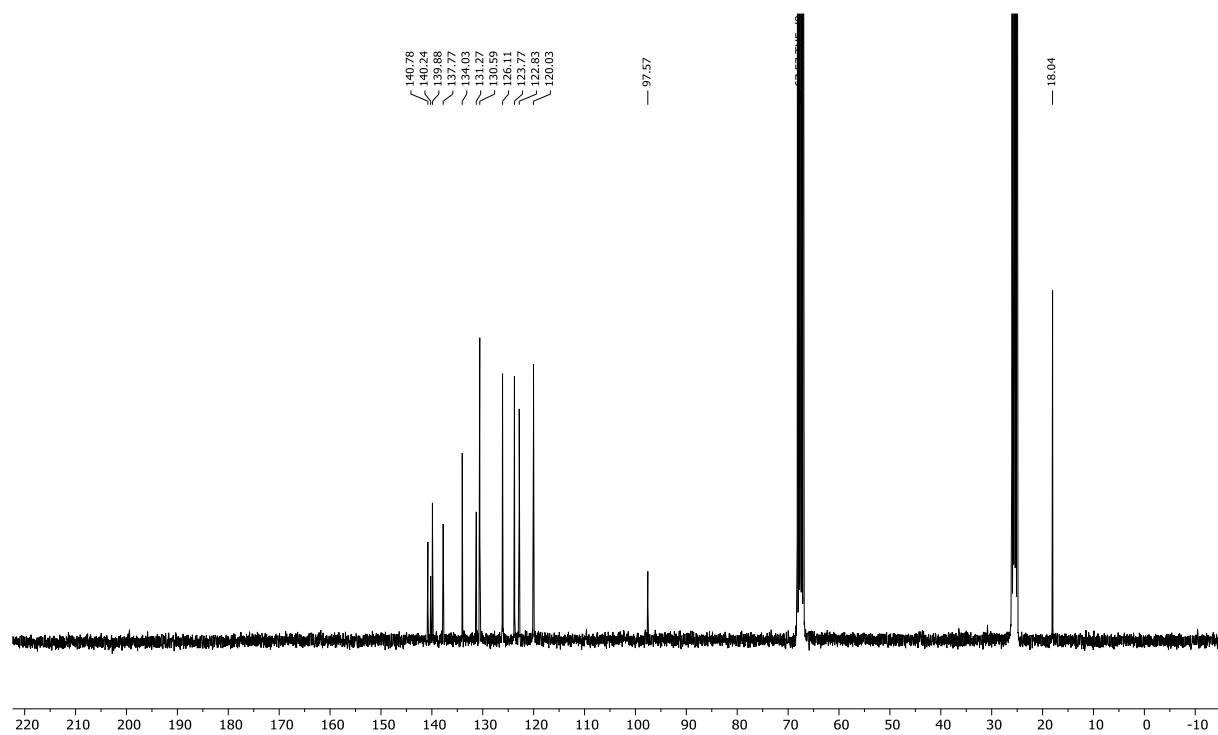

Figure 42.  $^{13}\text{C-}\{^1\text{H}\}$ -NMR of BBTT **3i** (75 MHz,  $\text{THF-d}_8$ , 298 K).

2.1.2.14 6-(2-methoxy-6-methylphenyl)-6H-benzo[4,5]thieno[3,2-b]benzo[4,5]thieno[2,3-e][1,4]thiazine (3t)

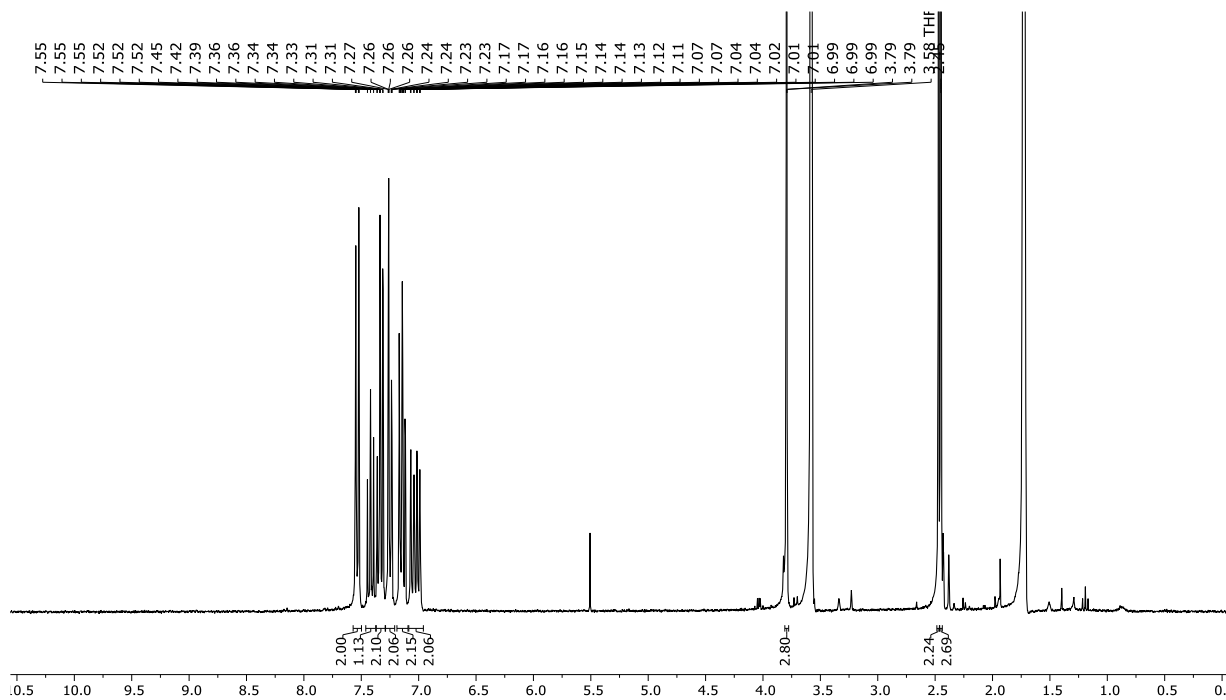

Figure 43.  $^1\text{H-NMR}$  of BBTT **3t** (300 MHz,  $\text{THF-d}_8$ , 298 K).

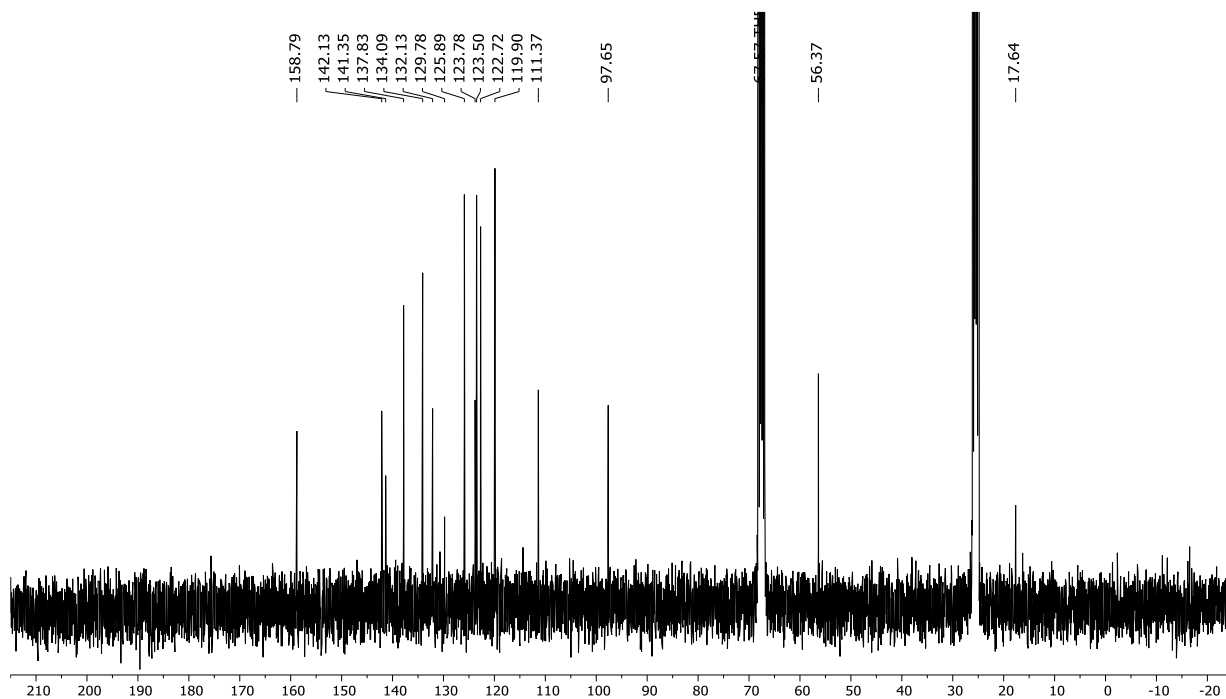

Figure 44.  $^{13}\text{C-}\{^1\text{H}\}$ -NMR of BBTT **3t** (75 MHz,  $\text{THF-d}_8$ , 298 K).

2.1.2.15 6-(2,6-dimethoxyphenyl)-6H-benzo[4,5]thieno[3,2-b]benzo[4,5]thieno[2,3-e][1,4]thiazine (3j)

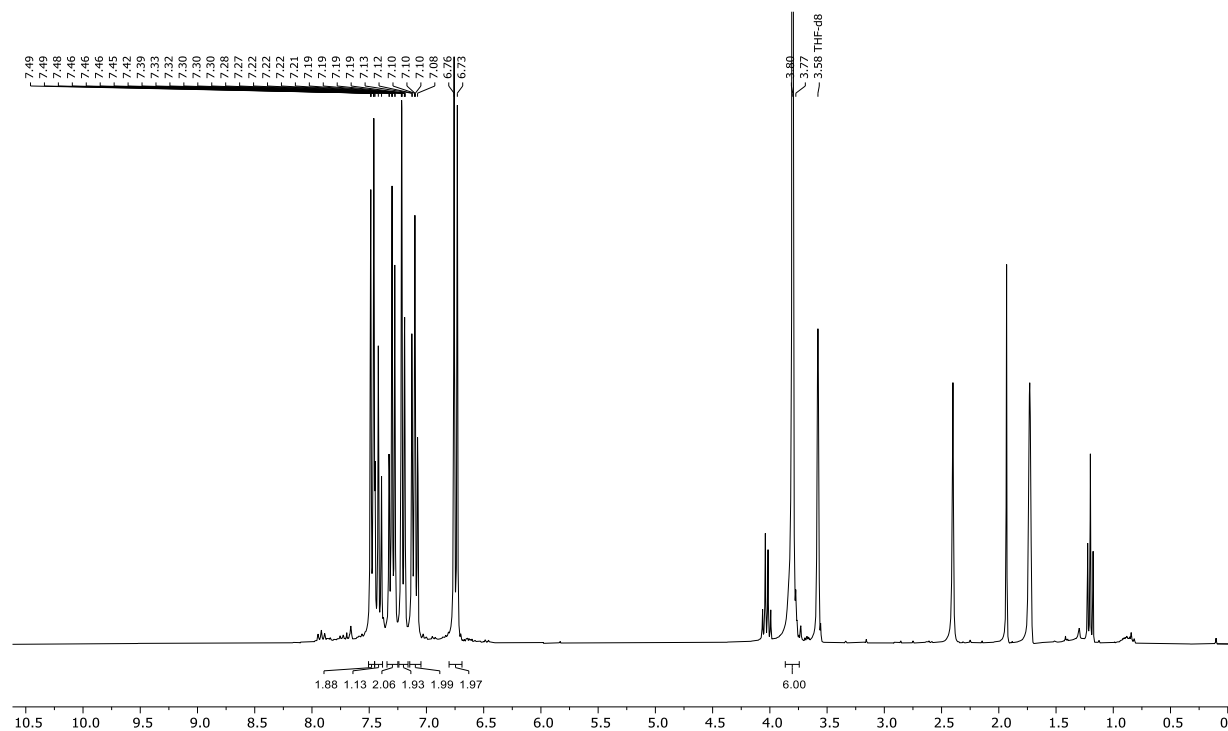

Figure 45.  $^1\text{H-NMR}$  of BBTT **3j** (300 MHz,  $\text{THF-}d_8$ , 298 K).

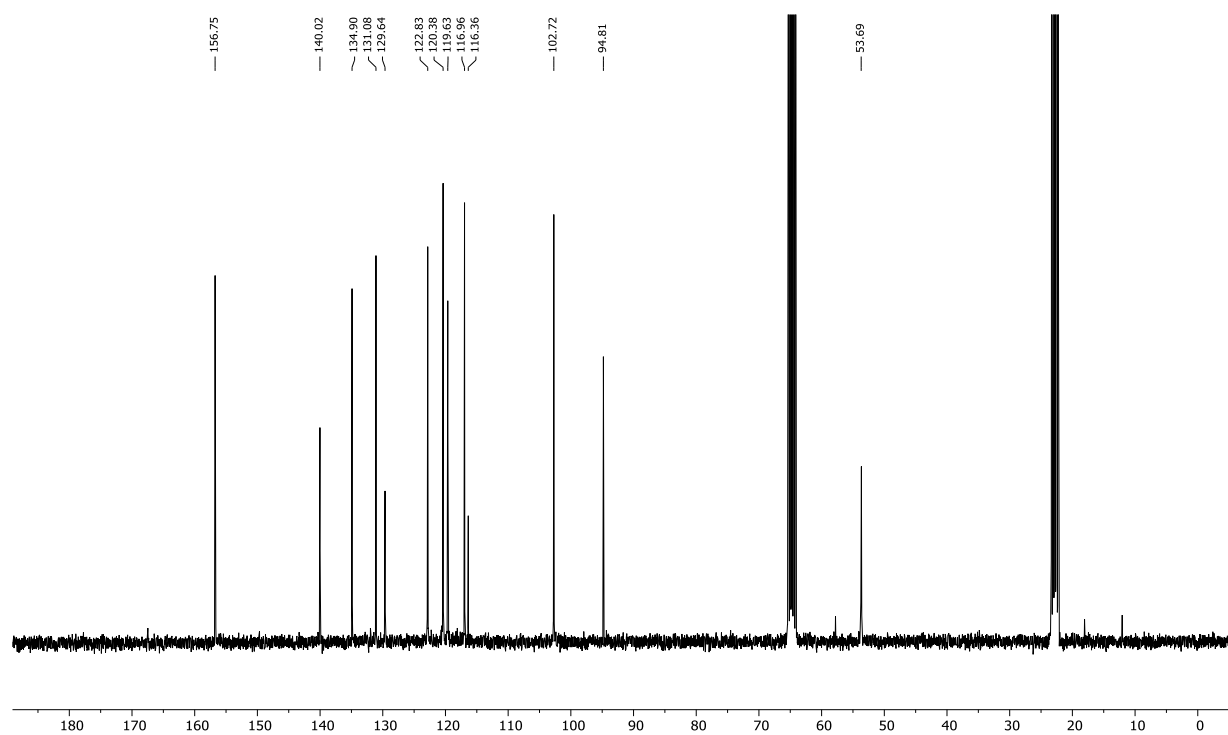

Figure 46.  $^{13}\text{C-}\{^1\text{H}\}$ -NMR of BBTT **3j** (75 MHz,  $\text{THF-}d_8$ , 298 K).

## 2.1.3 *Anti-anti*-3,9-dibromo-*N-ortho*(,*ortho'*)-(di)substituted-Phenyl-BBTT 4

### 2.1.3.1 3,9-Dibromo-6-(*o*-tolyl)-6*H*-benzo[4,5]thieno[3,2-*b*]benzo[4,5]thieno[2,3-*e*][1,4]thiazine (4a)

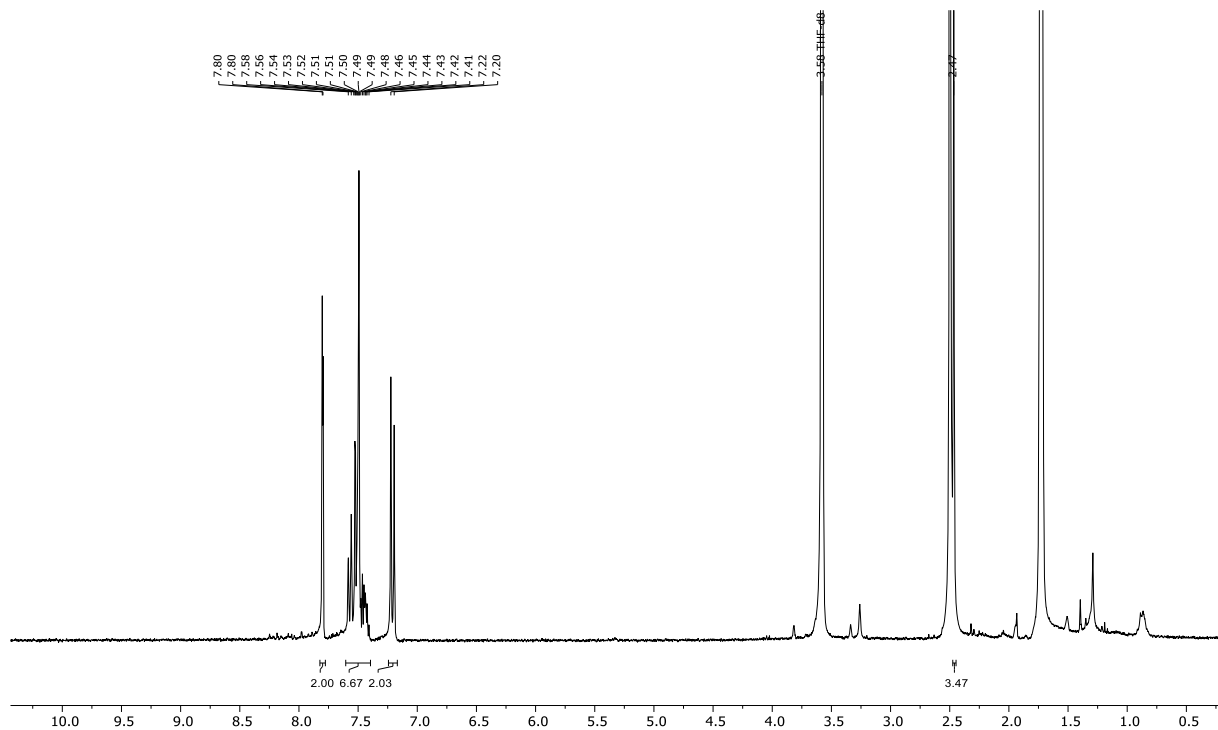

Figure 47.  $^1\text{H-NMR}$  of BBTT **4a** (300 MHz,  $\text{THF-}d_8$ , 298 K).

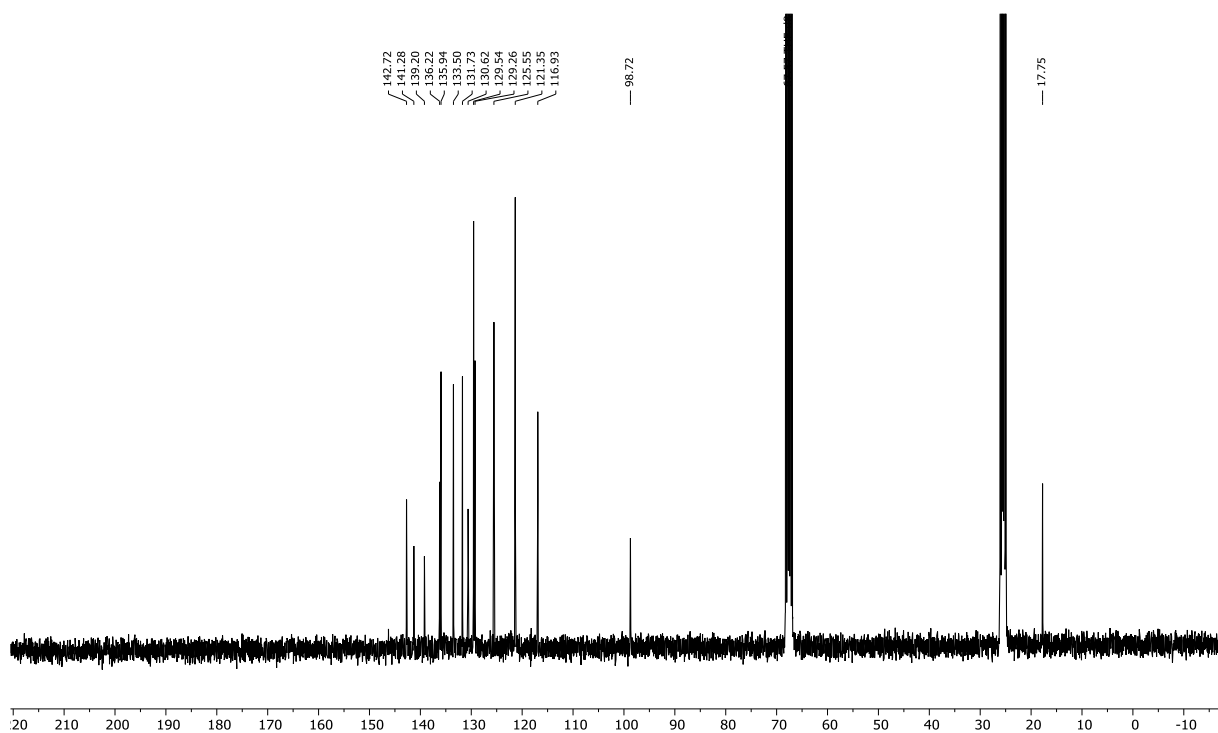

Figure 48.  $^{13}\text{C-}\{^1\text{H}\}$ -NMR of BBTT **4a** (75 MHz,  $\text{THF-}d_8$ , 298 K).

2.1.3.2 3,9-Dibromo-6-(2-chloro-6-methoxyphenyl)-6H-benzo[4,5]thieno[3,2-b]benzo[4,5]thieno[2,3-e][1,4]thiazine (4b)

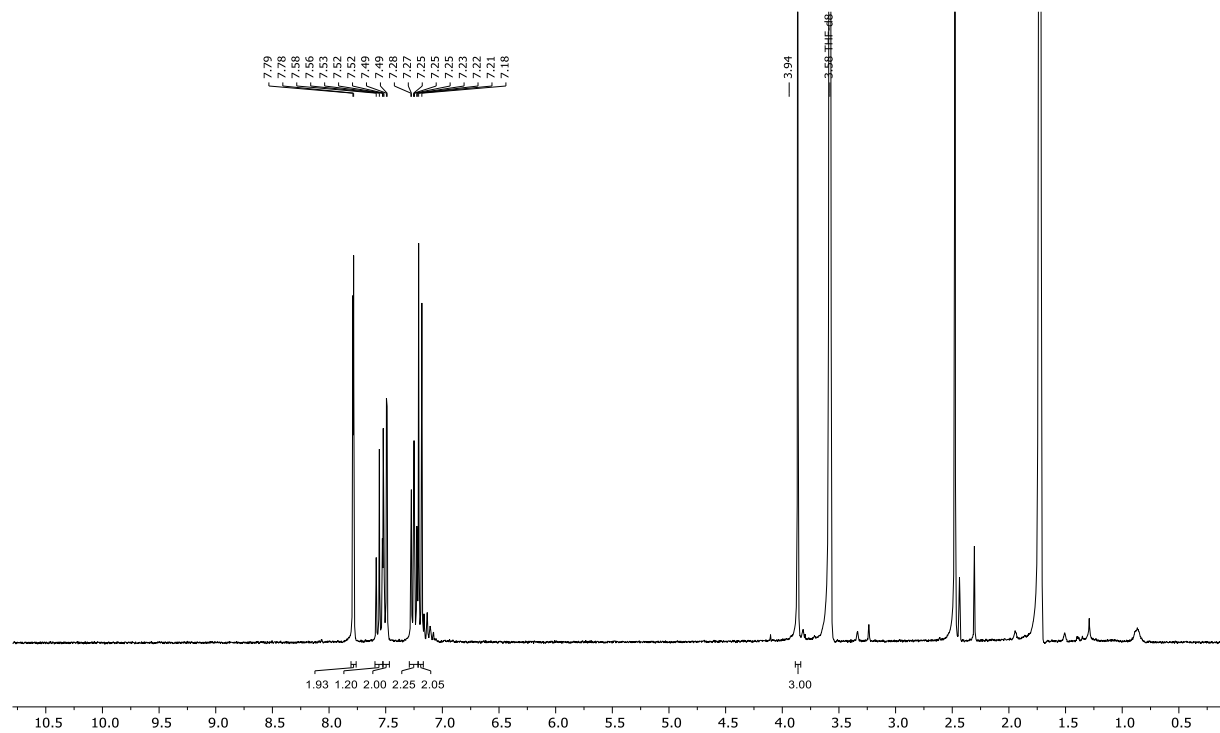

Figure 49.  $^1\text{H-NMR}$  of BBTT **4b** (300 MHz, THF- $d_8$ , 298 K).

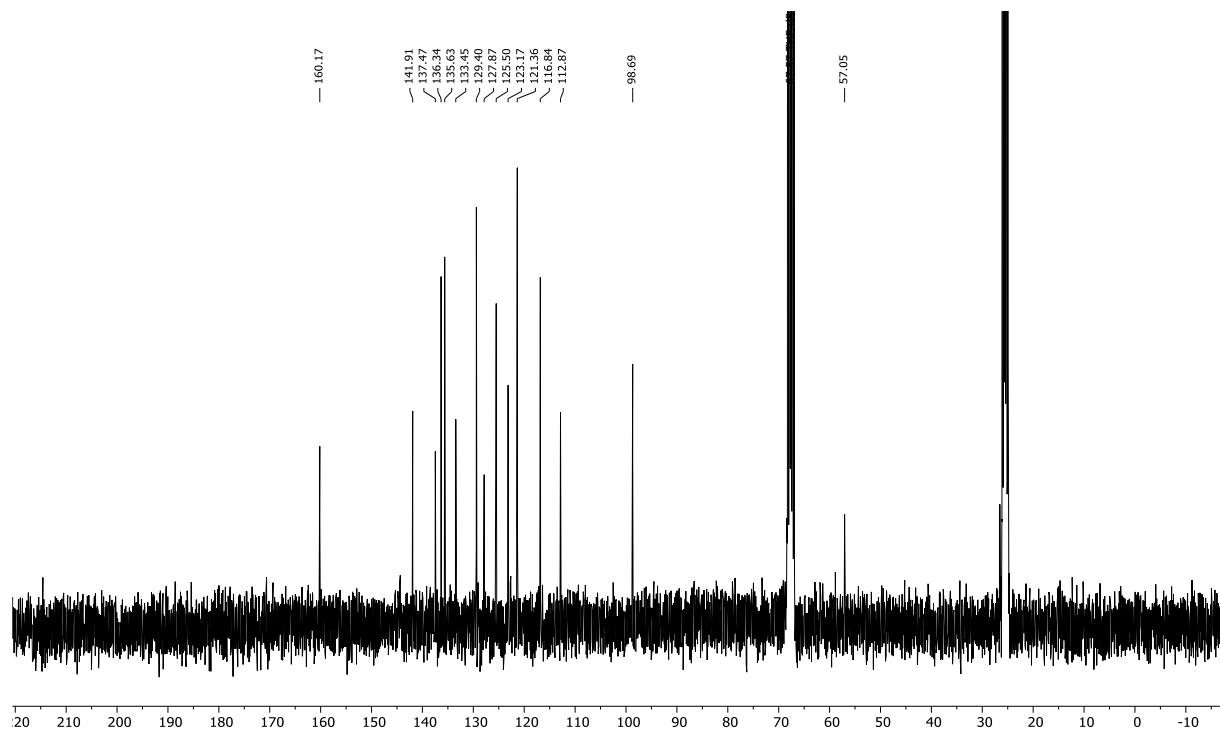

Figure 50.  $^{13}\text{C-}\{^1\text{H}\}$ -NMR of BBTT **4b** (75 MHz, THF- $d_8$ , 298 K).

2.1.3.3 3,9-Dibromo-6-(2-fluoro-6-methoxyphenyl)-6H-benzo[4,5]thieno[3,2-b]benzo[4,5]thieno[2,3-e][1,4]thiazine (4c)

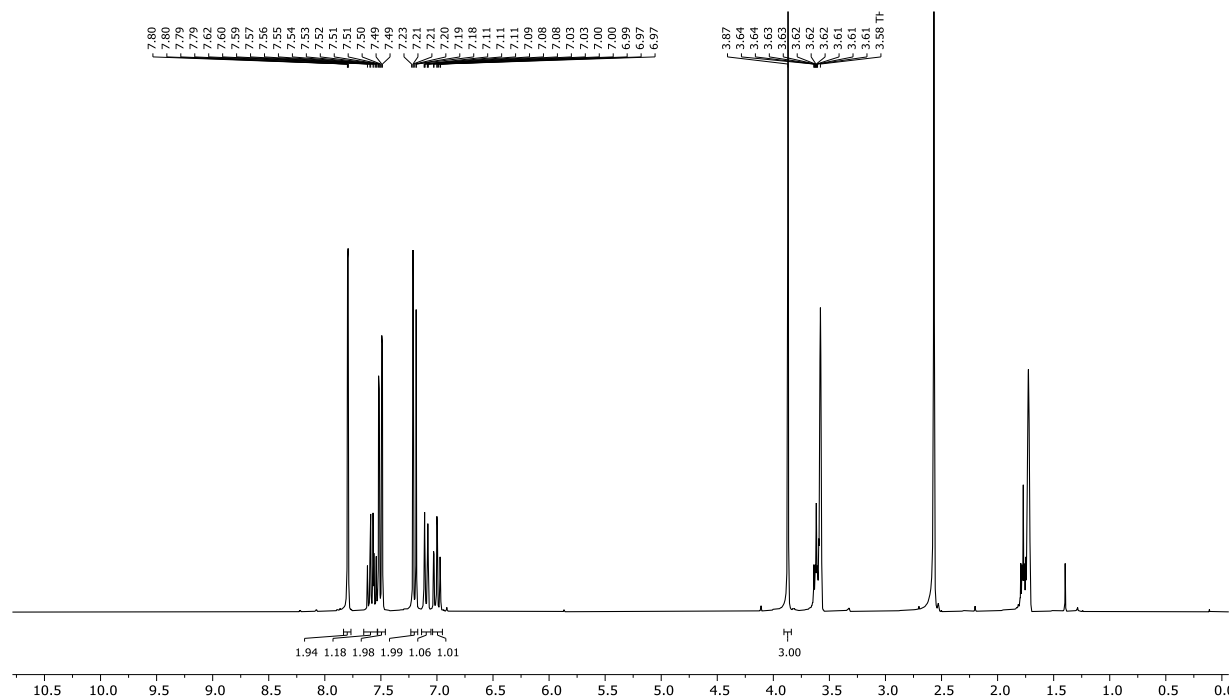

Figure 51.  $^1\text{H-NMR}$  of BBTT **4c** (300 MHz,  $\text{THF-}d_6$ , 298 K).

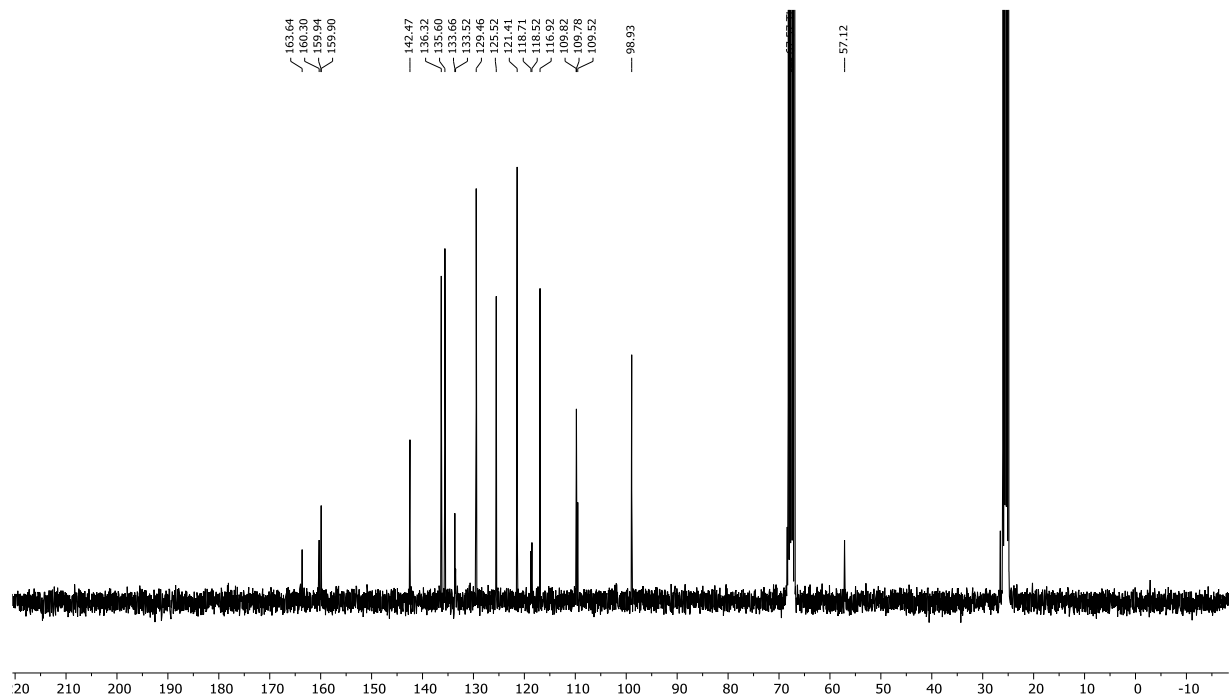

Figure 52.  $^{13}\text{C}\{-^1\text{H}\}$ -NMR of BBTT **4c** (75 MHz,  $\text{THF-}d_6$ , 298 K).

2.1.3.4 3,9-Dibrom-6-(2,6-dimethoxyphenyl)-6H-benzo[4,5]thieno[3,2-*b*]benzo[4,5]thieno[2,3-*e*][1,4]thiazine (4d)

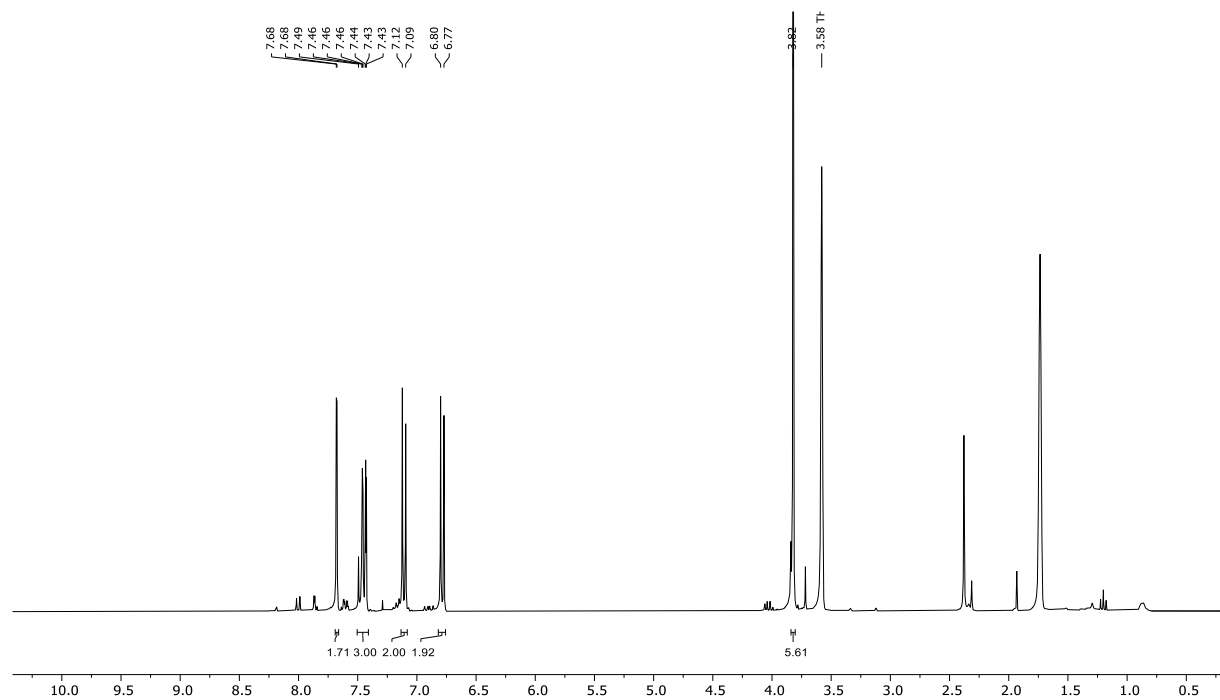

Figure 53.  $^1\text{H-NMR}$  of BBTT **4d** (300 MHz,  $\text{THF-}d_8$ , 298 K).

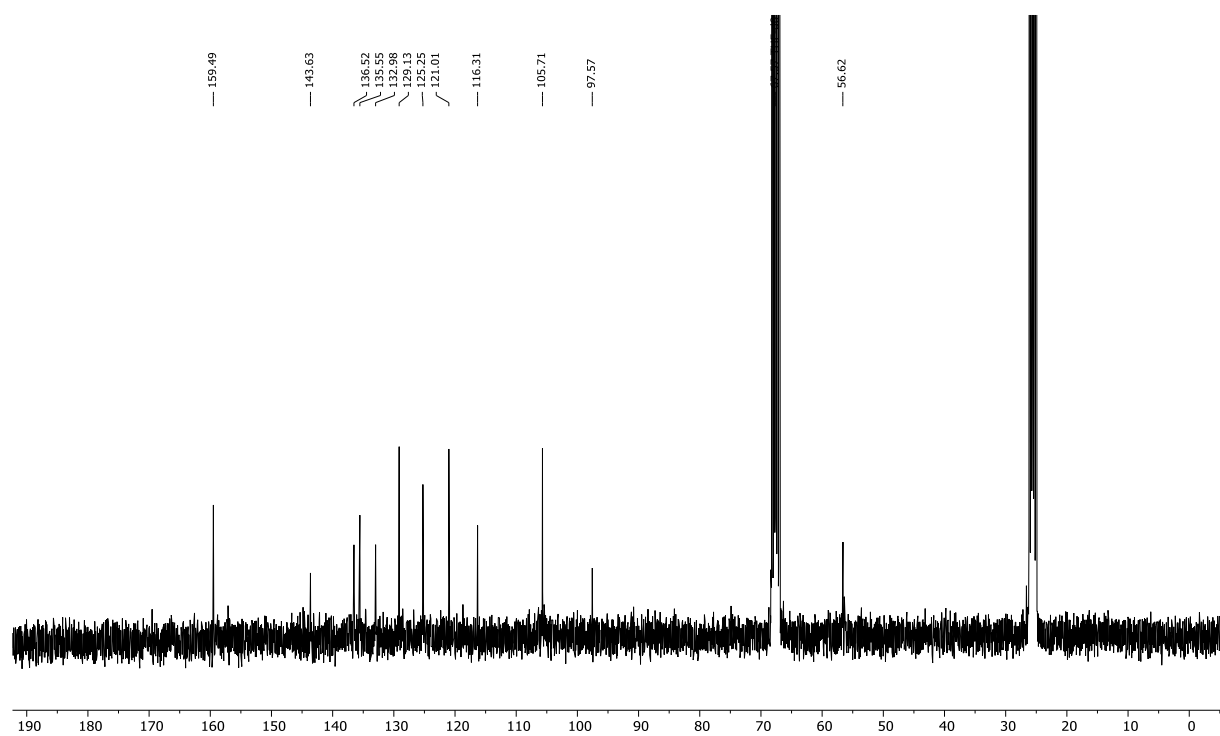

Figure 54.  $^{13}\text{C-}\{^1\text{H}\}$ -NMR of BBTT **4d** (75 MHz,  $\text{THF-}d_8$ , 298 K).



### 3 Crystal structures and data

#### 3.1 Molecular structure

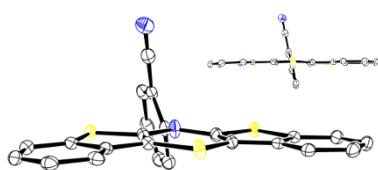

$R^1 = R^2 = H, R^3 = CN$  (**3a**)<sup>[b]</sup>

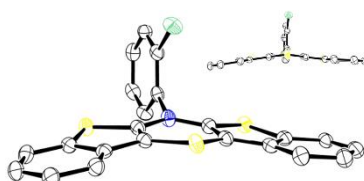

$R^1 = R^2 = H, R^3 = Cl$  (**3b**)<sup>[b]</sup>

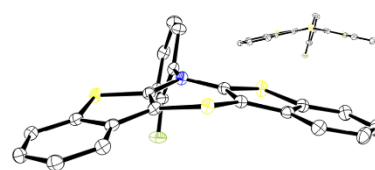

$R^1 = R^2 = H, R^3 = F$  (**3c**)<sup>[b]</sup>

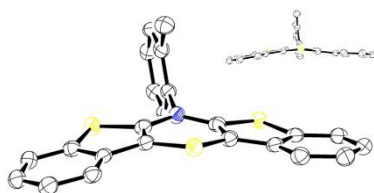

$R^1 = R^2 = H, R^3 = Me$  (**3d**)<sup>[b]</sup>

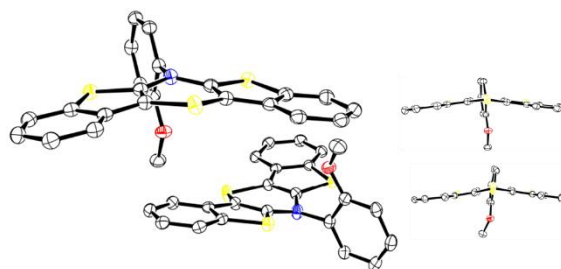

$R^1 = R^2 = H, R^3 = OMe$  (**3e**)<sup>[a]</sup>

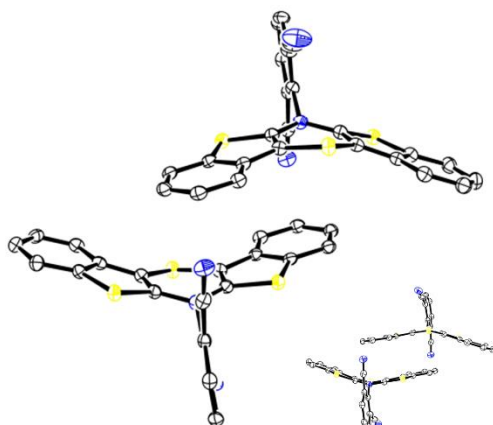

$R^1 = R^2 = H, R^3 = CN$  (**3f**)<sup>[a]</sup>

(polymorph I)

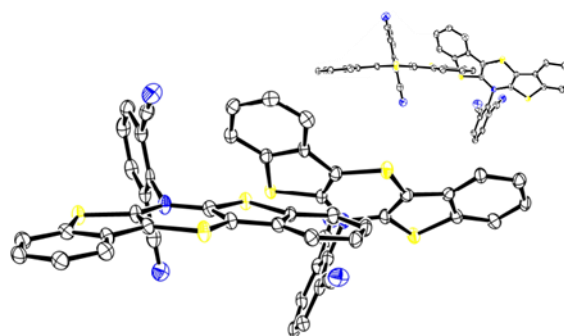

$R^1 = R^2 = H, R^3 = CN$  (**3f**)<sup>[a]</sup>

(polymorph II)

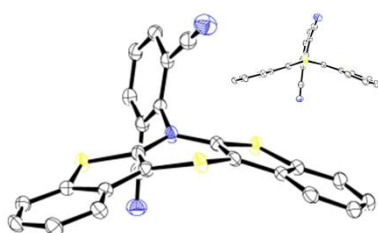

$R^1 = R^2 = H, R^3 = CN$  (**3f**)<sup>[b]</sup>

(polymorph III)

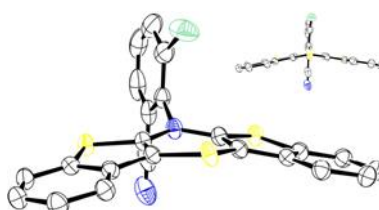

$R^1 = H, R^2 = CN, R^3 = Cl$  (**3k**)<sup>[b]</sup>

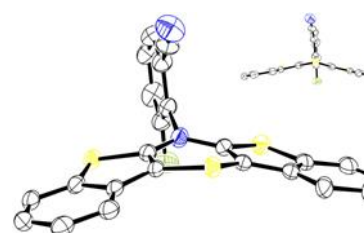

$R^1 = H, R^2 = CN, R^3 = F$  (**3l**)<sup>[b]</sup>

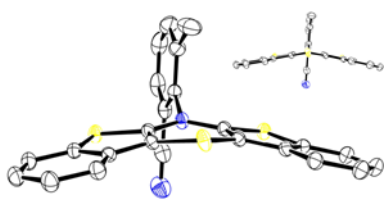

$R^1 = H, R^2 = CN, R^3 = Me$  (**3m**)<sup>[b]</sup>

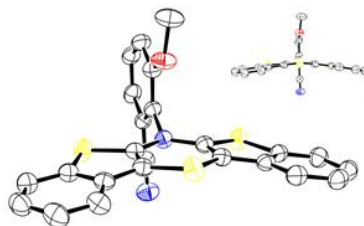

$R^1 = H, R^2 = CN, R^3 = OMe$  (**3n**)<sup>[b]</sup>

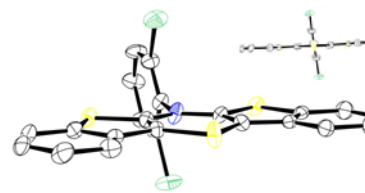

$R^1 = R^2 = H, R^3 = Cl$  (**3g**)<sup>[b]</sup>

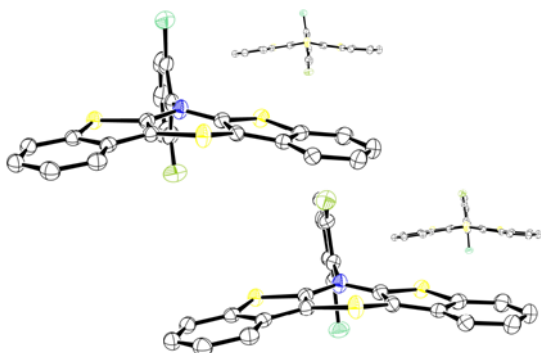

$R^1 = H, R^2 = Cl, R^3 = F$  (**3o**)<sup>[b,c]</sup>

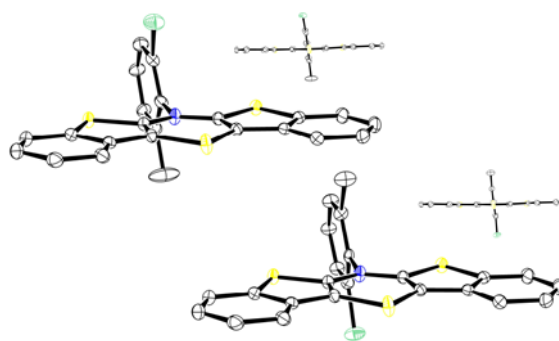

$R^1 = H, R^2 = Cl, R^3 = Me$  (**3p**)<sup>[b,c]</sup>

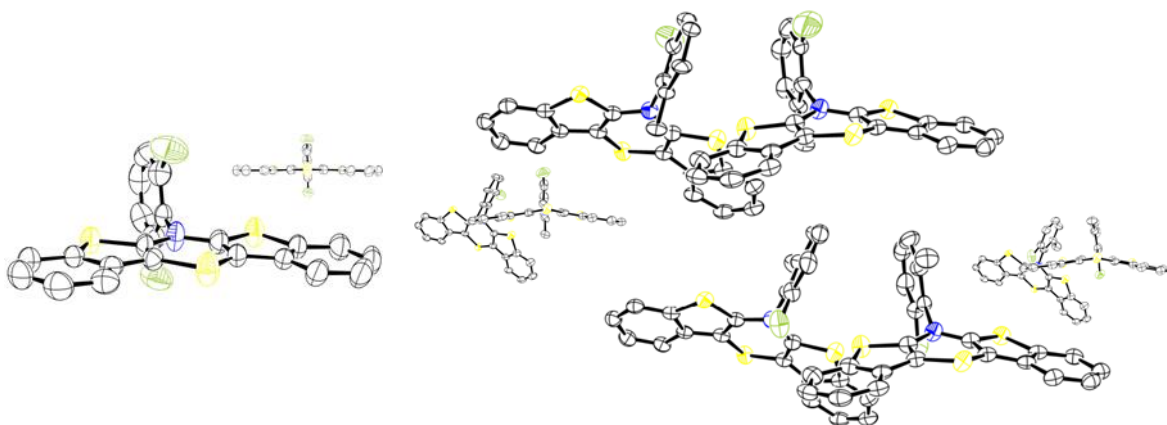

$R^1 = R^2 = H, R^3 = F$  (**3h**)<sup>[b]</sup>

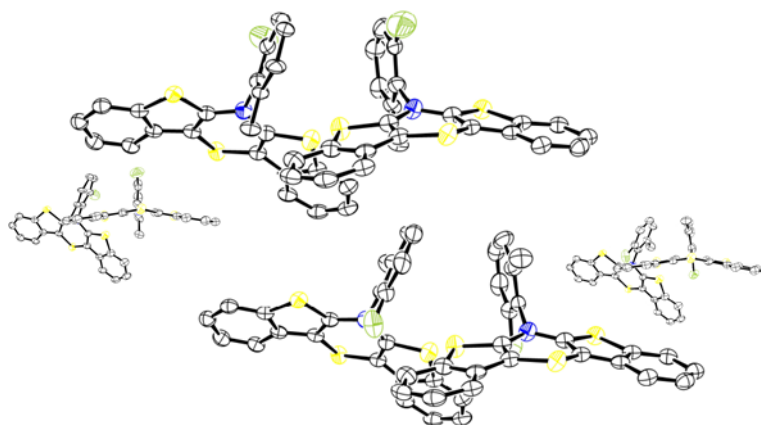

$R^1 = H, R^2 = F, R^3 = Me$  (**3r**)<sup>[a,c]</sup>

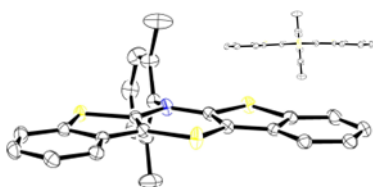

$R^1 = R^2 = H, R^3 = Me$  (**3i**)<sup>[b]</sup>

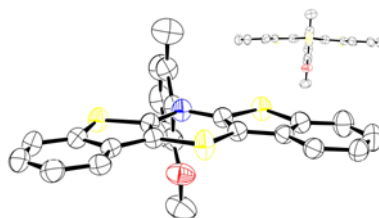

$R^1 = H, R^2 = Me, R^3 = OMe$  (**3t**)<sup>[b]</sup>

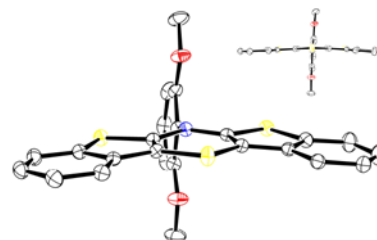

$R^1 = R^2 = H, R^3 = OMe$  (**3j**)<sup>[b]</sup>

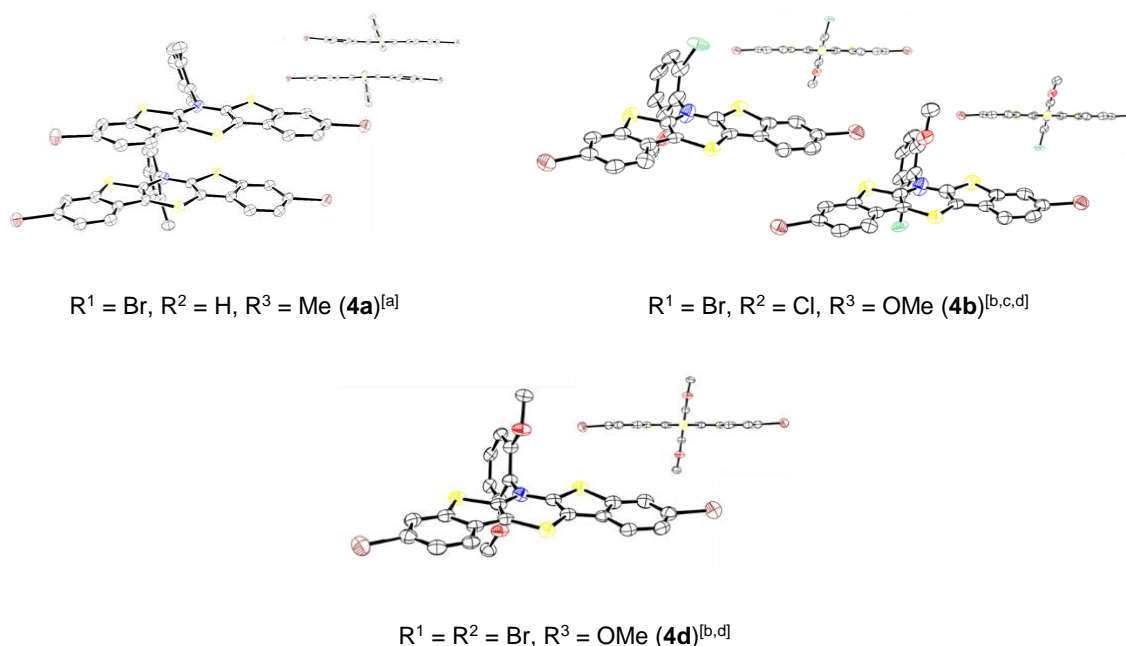

<sup>[a]</sup>The asymmetric unit consists of two BBTT molecules that differ in their arrangement of the BBTT's backbone and *N*-aryl moiety to each other. <sup>[b]</sup>The asymmetric unit consists of one BBTT molecule. <sup>[c]</sup>Each BBTT's molecule shows two conformers, that do not differ in their arrangement of the BBTT's backbone, but in the orientation of the *N*-aryl moiety. <sup>[d]</sup>The asymmetric unit consists of only half a BBTT's molecule by means of division along the *S-N*-axis.

Figure 55. Molecular structure of BBTTs **3** and **4**. The thermal ellipsoids are set at a 50% probability level and all hydrogen atoms are omitted for clarity.

### 3.1.1 Table for angles

The angles were determined analogously to the method previously defined in the literature.<sup>6</sup>

Table 1. Comparison of folding angles  $\varphi$ , torsion angles  $\alpha$  and *S-N-C<sub>aryl</sub>*-angles  $\beta$  of BBTTs **3** and **4** of the molecule's geometry by crystal structure analysis and DFT-calculation. (B3LYP/6-311++G\*\*).

| 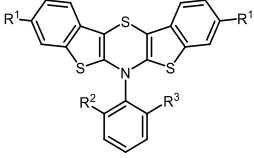 | folding angle / ° | torsion angle / ° | <i>S-N-C<sub>aryl</sub></i> -angle / ° | density / g cm <sup>-3</sup> |
|-------------------------------------------------------------------------------------|-------------------|-------------------|----------------------------------------|------------------------------|
|                                                                                     | $\varphi$         | $\alpha$          | $\beta$                                |                              |
| $R^1 = R^2 = \text{H}, R^3 = \text{CN}$ ( <b>3a</b> )<br>(exp.)                     | 177.7             | 13.7              | 186.5                                  | 1.483                        |
| $R^1 = R^2 = \text{H}, R^3 = \text{CN}$ ( <b>3a</b> )<br>(calc.)                    | 148.4             | 6.8               | 162.1                                  |                              |
| $R^1 = R^2 = \text{H}, R^3 = \text{Cl}$ ( <b>3b</b> )<br>(exp.)                     | 166.9             | 1.5               | 174.0                                  | 1.523                        |
| $R^1 = R^2 = \text{H}, R^3 = \text{Cl}$ ( <b>3b</b> )<br>(calc.)                    | 150.8             | 0.0               | 156.7                                  |                              |

|                                                                                                  |       |      |                     |       |
|--------------------------------------------------------------------------------------------------|-------|------|---------------------|-------|
| R <sup>1</sup> = R <sup>2</sup> = H, R <sup>3</sup> = F ( <b>3c</b> )<br>(exp.)                  | 155.6 | 15.3 | 182.5               | 1.516 |
| R <sup>1</sup> = R <sup>2</sup> = H, R <sup>3</sup> = F ( <b>3c</b> )<br>(calc.)                 | 148.6 | 0.0  | 145.1               |       |
| R <sup>1</sup> = R <sup>2</sup> = H, R <sup>3</sup> = Me ( <b>3d</b> )<br>(exp.)                 | 166.6 | 6.8  | 174.9               | 1.456 |
| R <sup>1</sup> = R <sup>2</sup> = H, R <sup>3</sup> = Me ( <b>3d</b> )<br>(calc.)                | 149.3 | 0.0  | 160.3               |       |
| R <sup>1</sup> = R <sup>2</sup> = H, R <sup>3</sup> = OMe ( <b>3e</b> )<br>(exp.)                | 163.9 | 10.7 | 179.6 (molecule I)  | 1.484 |
|                                                                                                  | 165.5 | 4.4  | 175.5 (molecule II) |       |
| R <sup>1</sup> = R <sup>2</sup> = H, R <sup>3</sup> = OMe ( <b>3e</b> )<br>(calc.)               | 155.7 | 0.0  | 175.0               |       |
| R <sup>1</sup> = R <sup>2</sup> = H, R <sup>3</sup> = CN ( <b>3f</b> )<br>(exp.) (polymorph I)   | 151.1 | 9.2  | 140.5 (molecule I)  | 1.460 |
|                                                                                                  | 154.0 | 11.3 | 142.9 (molecule II) |       |
| R <sup>1</sup> = R <sup>2</sup> = H, R <sup>3</sup> = CN ( <b>3f</b> )<br>(exp.) (polymorph II)  | 163.7 | 11.4 | 153.7 (molecule I)  | 1.488 |
|                                                                                                  | 172.1 | 11.6 | 163.4 (molecule II) |       |
| R <sup>1</sup> = R <sup>2</sup> = H, R <sup>3</sup> = CN ( <b>3f</b> )<br>(exp.) (polymorph III) | 146.3 | 15.5 | 169.8               | 1.486 |
| R <sup>1</sup> = R <sup>2</sup> = H, R <sup>3</sup> = CN ( <b>3f</b> )<br>(calc.)                | 154.5 | 0.04 | 141.5               |       |
| R <sup>1</sup> = H, R <sup>2</sup> = CN, R <sup>3</sup> = Cl ( <b>3k</b> )<br>(exp.)             | 159.9 | 2.4  | 154.1               | 1.522 |
| R <sup>1</sup> = H, R <sup>2</sup> = CN, R <sup>3</sup> = Cl ( <b>3k</b> )<br>(calc.)            | 154.2 | 0.0  | 142.7               |       |
| R <sup>1</sup> = H, R <sup>2</sup> = CN, R <sup>3</sup> = F ( <b>3l</b> )<br>(exp.)              | 157.4 | 6.5  | 156.9               | 1.508 |
| R <sup>1</sup> = H, R <sup>2</sup> = CN, R <sup>3</sup> = F ( <b>3l</b> )<br>(calc.)             | 149.7 | 0.15 | 156.0               |       |
| R <sup>1</sup> = H, R <sup>2</sup> = CN, R <sup>3</sup> = Me<br>( <b>3m</b> ) (exp.)             | 158.9 | 2.93 | 159.9               | 1.440 |
| R <sup>1</sup> = H, R <sup>2</sup> = CN, R <sup>3</sup> = Me<br>( <b>3m</b> ) (calc.)            | 154.2 | 0.0  | 167.3               |       |
| R <sup>1</sup> = H, R <sup>2</sup> = CN, R <sup>3</sup> = OMe<br>( <b>3n</b> ) (exp.)            | 164.9 | 0.5  | 153.7               | 1.446 |
| R <sup>1</sup> = H, R <sup>2</sup> = CN, R <sup>3</sup> = OMe<br>( <b>3n</b> ) (calc.)           | 155.1 | 0.0  | 140.6               |       |

|                                                                                       |       |     |                                      |       |
|---------------------------------------------------------------------------------------|-------|-----|--------------------------------------|-------|
| R <sup>1</sup> = R <sup>2</sup> = H, R <sup>3</sup> = Cl ( <b>3g</b> )<br>(exp.)      | 178.9 | 7.0 | 182.6                                | 1.580 |
| R <sup>1</sup> = R <sup>2</sup> = H, R <sup>3</sup> = Cl ( <b>3g</b> )<br>(calc.)     | 154.1 | 0.0 | 146.4                                |       |
| R <sup>1</sup> = H, R <sup>2</sup> = Cl, R <sup>3</sup> = F ( <b>3o</b> )<br>(exp.)   | 165.0 | 8.5 | 171.3 (conformer I)                  | 1.589 |
|                                                                                       | 165.0 | 5.6 | 186.7 (conformer II)                 |       |
| R <sup>1</sup> = H, R <sup>2</sup> = Cl, R <sup>3</sup> = F ( <b>3o</b> )<br>(calc.)  | 151.1 | 0.0 | 139.1 (conformer I)                  |       |
| R <sup>1</sup> = H, R <sup>2</sup> = Cl, R <sup>3</sup> = F ( <b>3o</b> )<br>(calc.)  | 150.9 | 0.2 | 150.9 (conformer II)                 |       |
| R <sup>1</sup> = H, R <sup>2</sup> = Cl, R <sup>3</sup> = Me ( <b>3p</b> )<br>(exp.)  | 177.8 | 6.6 | 183.8 (conformer I)                  | 1.497 |
|                                                                                       | 177.8 | 5.8 | 183.8 (conformer II)                 |       |
| R <sup>1</sup> = H, R <sup>2</sup> = Cl, R <sup>3</sup> = Me ( <b>3p</b> )<br>(calc.) | 154.6 | 0.0 | 151.0 (conformer I)                  |       |
| R <sup>1</sup> = H, R <sup>2</sup> = Cl, R <sup>3</sup> = Me ( <b>3p</b> )<br>(calc.) | 169.6 | 0.0 | 172.8 (conformer II)                 |       |
| R <sup>1</sup> = R <sup>2</sup> = H, R <sup>3</sup> = F ( <b>3h</b> )<br>(exp.)       | 178.2 | 1.3 | 170.8                                | 1.511 |
| R <sup>1</sup> = R <sup>2</sup> = H, R <sup>3</sup> = F ( <b>3h</b> )<br>(calc.)      | 149.7 | 0.0 | 143.7                                |       |
|                                                                                       |       |     | 153.5 (molecule I,<br>conformer I)   |       |
|                                                                                       | 161.4 | 8.6 | 162.0 (molecule I,<br>conformer II)  | 1.474 |
| R <sup>1</sup> = H, R <sup>2</sup> = F, R <sup>3</sup> = Me ( <b>3r</b> )<br>(exp.)   | 161.4 | 0.9 | 157.6 (molecule II,<br>conformer I)  |       |
|                                                                                       | 161.7 | 6.3 | 160.5 (molecule II,<br>conformer II) |       |
|                                                                                       | 161.7 | 0.2 |                                      |       |
| R <sup>1</sup> = H, R <sup>2</sup> = F, R <sup>3</sup> = Me ( <b>3r</b> )<br>(calc.)  | 150.8 | 0.1 | 159.0 (conformer I)                  |       |
| R <sup>1</sup> = H, R <sup>2</sup> = F, R <sup>3</sup> = Me ( <b>3r</b> )<br>(calc.)  | 169.3 | 0.1 | 168.0 (conformer II)                 |       |
| R <sup>1</sup> = R <sup>2</sup> = H, R <sup>3</sup> = Me ( <b>3i</b> )<br>(exp.)      | 176.8 | 2.5 | 185.5                                | 1.412 |
| R <sup>1</sup> = R <sup>2</sup> = H, R <sup>3</sup> = Me ( <b>3i</b> )<br>(calc.)     | 166.1 | 0.0 | 171.4                                |       |
| R <sup>1</sup> = H, R <sup>2</sup> = Me, R <sup>3</sup> = OMe<br>( <b>3t</b> ) (exp.) | 174.5 | 1.9 | 189.2                                | 1.416 |

|                                                                                         |       |        |                      |       |
|-----------------------------------------------------------------------------------------|-------|--------|----------------------|-------|
| R <sup>1</sup> = H, R <sup>2</sup> = Me, R <sup>3</sup> = OMe<br>( <b>3t</b> ) (calc.)  | 156.2 | 0.0    | 173.0                |       |
| R <sup>1</sup> = R <sup>2</sup> = H, R <sup>3</sup> = OMe ( <b>3j</b> )<br>(exp.)       | 173.7 | 4.2    | 192.0                | 1.478 |
| R <sup>1</sup> = R <sup>2</sup> = H, R <sup>3</sup> = OMe ( <b>3j</b> )<br>(calc.)      | 158.2 | 0.1    | 166.7                |       |
| R <sup>1</sup> = Br, R <sup>2</sup> = H, R <sup>3</sup> = Me ( <b>4a</b> )<br>(exp.)    | 177.3 | 5.5    | 194.2 (molecule I)   | 1.777 |
|                                                                                         | 177.3 | 19.5   | 188.7 (molecule II)  |       |
| R <sup>1</sup> = Br, R <sup>2</sup> = H, R <sup>3</sup> = Me ( <b>4a</b> )<br>(calc.)   | 148.4 | 0.1188 | 161.7                |       |
| R <sup>1</sup> = Br, R <sup>2</sup> = Cl, R <sup>3</sup> = OMe<br>( <b>4b</b> ) (exp.)  | 180.0 | 12.5   | 180.0 (conformer I)  | 1.843 |
|                                                                                         | 180.0 | 12.5   | 180.0 (conformer II) |       |
| R <sup>1</sup> = Br, R <sup>2</sup> = Cl, R <sup>3</sup> = OMe<br>( <b>4b</b> ) (calc.) | 158.7 | 0.0    | 172.4 (conformer I)  |       |
| R <sup>1</sup> = Br, R <sup>2</sup> = Cl, R <sup>3</sup> = OMe<br>( <b>4b</b> ) (calc.) | 166.0 | 0.0    | 162.9 (conformer II) |       |
| R <sup>1</sup> = Br, R <sup>2</sup> = R <sup>3</sup> = OMe ( <b>4d</b> )<br>(exp.)      | 180.0 | 8.3    | 180.0                | 1.790 |
| R <sup>1</sup> = Br, R <sup>2</sup> = R <sup>3</sup> = OMe ( <b>4d</b> )<br>(calc.)     | 158.2 | 0.0    | 165.2                |       |

### 3.1.2 Tables for crystallographic data

Table 2. Crystal data parameters for compounds **3a-d**.

|                             | <b>3a</b>                                                     | <b>3b</b>                                         | <b>3c</b>                                        | <b>3d</b>                                       |
|-----------------------------|---------------------------------------------------------------|---------------------------------------------------|--------------------------------------------------|-------------------------------------------------|
| CCDC No.                    | 2346002                                                       | 2345988                                           | 2345990                                          | 2345982                                         |
| Molecular formula           | C <sub>23</sub> H <sub>12</sub> N <sub>2</sub> S <sub>3</sub> | C <sub>22</sub> H <sub>12</sub> CINS <sub>3</sub> | C <sub>22</sub> H <sub>12</sub> FNS <sub>3</sub> | C <sub>23</sub> H <sub>15</sub> NS <sub>3</sub> |
| Molecular weight<br>[g/mol] | 412.53                                                        | 421.96                                            | 405.51                                           | 401.54                                          |
| Crystal shape and<br>color  | block, red                                                    | block, yellow                                     | block, yellow                                    | block, yellow                                   |
| Size [mm]                   | 0.17 × 0.09 × 0.06                                            | 0.19 × 0.08 × 0.05                                | 0.18 × 0.16 × 0.09                               | 0.61 × 0.25 × 0.17                              |
| Temperature [K]             | 100(2)                                                        | 100(2)                                            | 100(2)                                           | 100(2)                                          |
| Crystal system              | orthorhombic                                                  | orthorhombic                                      | monoclinic                                       | orthorhombic                                    |
| Space group                 | <i>Pbca</i>                                                   | <i>Pna2<sub>1</sub></i>                           | <i>C2/c</i>                                      | <i>Pna2<sub>1</sub></i>                         |

|                                                  |                               |                               |                                       |                               |
|--------------------------------------------------|-------------------------------|-------------------------------|---------------------------------------|-------------------------------|
| Lattice parameters [Å]                           | a [Å] 8.01980(10) α [°]<br>90 | a [Å] 16.5856(2) α [°]<br>90  | a [Å] 23.3856(4) α [°]<br>90          | a [Å] 17.2183(2) α [°]<br>90  |
|                                                  | b [Å] 13.1079(2) β [°]<br>90  | b [Å] 17.2589(2) β [°]<br>90  | b [Å] 7.54300(10) β [°]<br>106.907(2) | b [Å] 17.7363(2) β [°]<br>90  |
|                                                  | c [Å] 35.1615(4) γ [°]<br>90  | c [Å] 6.42770(10) γ [°]<br>90 | c [Å] 21.0499(4) γ [°]<br>90          | c [Å] 5.99740(10) γ [°]<br>90 |
| Cell volume [Å <sup>3</sup> ]                    | 3696.27(8)                    | 1839.92(4)                    | 3552.66(11)                           | 1831.54(4)                    |
| Z                                                | 8                             | 4                             | 8                                     | 4                             |
| Calculated density [g/ml]                        | 1.483                         | 1.523                         | 1.516                                 | 1.456                         |
| Absorption coefficient [mm <sup>-1</sup> ]       | 3.751                         | 5.067                         | 3.956                                 | 3.748                         |
| F (000)                                          | 1696                          | 864                           | 1664                                  | 832                           |
| Range Θ [°]                                      | 2.50 – 76.09                  | 3.65 – 77.55                  | 3.93 – 77.69                          | 5.17 – 76.84                  |
| Array bounds                                     | -9 ≤ h ≤ 9                    | -21 ≤ h ≤ 20                  | -26 ≤ h ≤ 29                          | -21 ≤ h ≤ 20                  |
|                                                  | -14 ≤ k ≤ 16                  | -20 ≤ k ≤ 20                  | -9 ≤ k ≤ 9                            | -21 ≤ k ≤ 22                  |
|                                                  | -40 ≤ l ≤ 42                  | -8 ≤ l ≤ 7                    | -25 ≤ l ≤ 26                          | -7 ≤ l ≤ 7                    |
| Measured reflections                             | 18298                         | 23065                         | 20092                                 | 21850                         |
| Independent reflections                          | 3562                          | 3539                          | 3624                                  | 3779                          |
| Observed reflections (I > 2σ(I))                 | 3248                          | 3402                          | 3332                                  | 3670                          |
| Final R-value (I > 2σ(I)) <sup>[a]</sup>         | 0.0298                        | 0.0464                        | 0.0287                                | 0.0482                        |
|                                                  | 0.0749                        | 0.1226                        | 0.0742                                | 0.1197                        |
| R-value (whole data) <sup>[a]</sup>              | 0.0345                        | 0.0481                        | 0.0315                                | 0.0493                        |
|                                                  | 0.0772                        | 0.1246                        | 0.0766                                | 0.1211                        |
| Completeness                                     | 0.999                         | 1.000                         | 1.000                                 | 0.999                         |
| Indep. refl./constr./parameter                   | 3562/0/253                    | 3539/1/244                    | 3624/0/244                            | 3779/1/245                    |
| Goodness-of-fit-on F <sup>2</sup> <sub>[b]</sub> | 1.080                         | 1.061                         | 1.070                                 | 1.064                         |

<sup>[a]</sup>  $R1 = \frac{\sum ||F_o| - |F_c||}{\sum |F_o|}$ ;  $wR2 = \frac{[\sum w(F_o^2 - F_c^2)^2]}{[\sum w(F_o^2)^2]}^{1/2}$ ;  $w = 1/[\sigma^2(F_o^2) + (aP)^2 + bP]$  with  $P = (F_o^2 + 2F_c^2)/3$   
<sup>[b]</sup>  $GooF = S = \frac{[\sum w(F_o^2 - F_c^2)^2]}{(m-n)^{1/2}}$ . m = Number of reflexes. n = Number of parameter.

Table 3. Crystal data parameters for compounds **3e** and **3f**.

|          | <b>3e</b> | <b>3f (polymorph I)</b> | <b>3f (polymorph III)</b> | <b>3f (polymorph II)</b> |
|----------|-----------|-------------------------|---------------------------|--------------------------|
| CCDC No. | 2345989   | 2345999                 | 2345996                   | 2345994                  |

|                                                   |                                           |                                            |                                    |                                          |
|---------------------------------------------------|-------------------------------------------|--------------------------------------------|------------------------------------|------------------------------------------|
| Molecular formula                                 | $C_{23}H_{15}NOS_3$                       | $C_{24}H_{11}N_3S_3$                       | $C_{24}H_{11}N_3S_3$               | $C_{24}H_{11}N_3S_3$                     |
| Molecular weight [g/mol]                          | 417.54                                    | 437.54                                     | 437.54                             | 437.54                                   |
| Crystal shape and color                           | block, yellow                             | block, yellow                              | block, orange                      | block, red                               |
| Size [mm]                                         | 0.18 × 0.13 × 0.08                        | 0.34 × 0.27 × 0.16                         | 0.45 × 0.28 × 0.26                 | 0.26 × 0.17 × 0.06                       |
| Temperature [K]                                   | 100(2)                                    | 100(2)                                     | 100(2)                             | 100(2)                                   |
| Crystal system                                    | monoclinic                                | monoclinic                                 | orthorhombic                       | triclinic                                |
| Space group                                       | $P2_1/n$                                  | $P2_1/c$                                   | $Pna2_1$                           | $P\bar{1}$                               |
| Lattice parameters [Å]                            | a [Å] 11.52560(10) $\alpha$ [°] 90        | a [Å] 14.60590(10) $\alpha$ [°] 90         | a [Å] 14.60400(10) $\alpha$ [°] 90 | a [Å] 11.7646(4) $\alpha$ [°] 106.573(3) |
|                                                   | b [Å] 26.5077(3) $\beta$ [°] 107.4920(10) | b [Å] 12.08020(10) $\beta$ [°] 91.3410(10) | b [Å] 15.9177(2) $\beta$ [°] 90    | b [Å] 14.0915(4) $\beta$ [°] 105.665(3)  |
|                                                   | c [Å] 12.8253(2) $\gamma$ [°] 90          | c [Å] 22.5734(2) $\gamma$ [°] 90           | c [Å] 8.41400(10) $\gamma$ [°] 90  | c [Å] 14.4094(5) $\gamma$ [°] 110.564(3) |
| Cell volume [Å <sup>3</sup> ]                     | 3737.16(8)                                | 3981.81(6)                                 | 1955.94(4)                         | 1952.76(12)                              |
| Z                                                 | 8                                         | 8                                          | 4                                  | 4                                        |
| Calculated density [g/ml]                         | 1.484                                     | 1.460                                      | 1.486                              | 1.488                                    |
| Absorption coefficient [mm <sup>-1</sup> ]        | 3.739                                     | 3.535                                      | 3.598                              | 3.604                                    |
| F (000)                                           | 1728                                      | 1792                                       | 896                                | 896                                      |
| Range $\Theta$ [°]                                | 3.95 – 77.39                              | 3.57 – 77.22                               | 2.80 – 77.06                       | 3.41 – 77.74                             |
| Array bounds                                      | -14 ≤ h ≤ 14                              | -17 ≤ h ≤ 18                               | -18 ≤ h ≤ 17                       | -14 ≤ h ≤ 12                             |
|                                                   | -33 ≤ k ≤ 29                              | -15 ≤ k ≤ 12                               | -20 ≤ k ≤ 20                       | -16 ≤ k ≤ 17                             |
|                                                   | -15 ≤ l ≤ 15                              | -28 ≤ l ≤ 28                               | -8 ≤ l ≤ 10                        | -18 ≤ l ≤ 17                             |
| Measured reflections                              | 52097                                     | 38009                                      | 28238                              | 36244                                    |
| Independent reflections                           | 7659                                      | 8144                                       | 3726                               | 7871                                     |
| Observed reflections ( $I > 2\sigma(I)$ )         | 6955                                      | 7027                                       | 3669                               | 7093                                     |
| Final R-value ( $I > 2\sigma(I)$ ) <sup>[a]</sup> | 0.0339                                    | 0.0484                                     | 0.0280                             | 0.0659                                   |
|                                                   | 0.0846                                    | 0.1354                                     | 0.0744                             | 0.2082                                   |
| R-value (whole data) <sup>[a]</sup>               | 0.0375                                    | 0.0541                                     | 0.0284                             | 0.0708                                   |
|                                                   | 0.0869                                    | 0.1403                                     | 0.0748                             | 0.2105                                   |
| Completeness                                      | 0.999                                     | 1.000                                      | 1.000                              | 0.998                                    |



|                                          |            |            |            |            |
|------------------------------------------|------------|------------|------------|------------|
| Indep.<br>refl/constr./parameter         | 7659/0/507 | 8144/0/541 | 3726/1/271 | 7871/0/541 |
| Goodness-of-fit-on F <sup>2</sup><br>[b] | 1.052      | 1.036      | 1.093      | 1.155      |

[a]  $R1 = \frac{\sum ||F_o| - |F_c||}{\sum |F_o|}$ ;  $wR2 = \frac{[\sum (w(F_o^2 - F_c^2))^2]}{[\sum (wF_o^2)^2]}^{1/2}$ ;  $w = 1/[\sigma^2(F_o^2) + (aP)^2 + bP]$  with  $P = (F_o^2 + 2F_c^2)/3$   
[b]  $GoF = S = \frac{[\sum w(F_o^2 - F_c^2)^2]}{(m-n)^{1/2}}$ . m = Number of reflexes. n = Number of parameter.

Table 4. Crystal data parameters for compounds **3k-n**.

|                                               | <b>3k</b>                                                       | <b>3l</b>                                                      | <b>3m</b>                                                     | <b>3n</b>                                                      |
|-----------------------------------------------|-----------------------------------------------------------------|----------------------------------------------------------------|---------------------------------------------------------------|----------------------------------------------------------------|
| CCDC No.                                      | 2345983                                                         | 2345987                                                        | 2345959                                                       | 2345998                                                        |
| Molecular formula                             | C <sub>23</sub> H <sub>11</sub> ClN <sub>2</sub> S <sub>3</sub> | C <sub>23</sub> H <sub>11</sub> FN <sub>2</sub> S <sub>3</sub> | C <sub>24</sub> H <sub>14</sub> N <sub>2</sub> S <sub>3</sub> | C <sub>24</sub> H <sub>14</sub> N <sub>2</sub> OS <sub>3</sub> |
| Molecular weight<br>[g/mol]                   | 446.97                                                          | 430.52                                                         | 426.55                                                        | 442.55                                                         |
| Crystal shape and<br>color                    | block, orange                                                   | block, orange                                                  | block, yellow                                                 | block, orange                                                  |
| Size [mm]                                     | 0.13 × 0.11 × 0.05                                              | 0.25 × 0.08 × 0.05                                             | 0.45 × 0.37 × 0.34                                            | 0.102 × 0.062 × 0.039                                          |
| Temperature [K]                               | 100(2)                                                          | 100(2)                                                         | 140(2)                                                        | 150(2)                                                         |
| Crystal system                                | monoclinic                                                      | monoclinic                                                     | monoclinic                                                    | monoclinic                                                     |
| Space group                                   | <i>I</i> 2/a                                                    | <i>I</i> 2/a                                                   | <i>C</i> 2/c                                                  | <i>I</i> 2/a                                                   |
| Lattice parameters [Å]                        | a [Å] 16.3561(3) α [°]<br>90                                    | a [Å] 15.1168(3) α [°]<br>90                                   | a [Å] 33.709(2) α [°]<br>90                                   | a [Å] 15.9604(4) α [°]<br>90                                   |
|                                               | b [Å] 7.66140(10) β [°]<br>96.415(2)                            | b [Å] 15.1951(3) β [°]<br>90.678(2)                            | b [Å] 7.7121(5) β [°]<br>112.804(3)                           | b [Å] 8.0872(2) β [°]<br>96.199(2)                             |
|                                               | c [Å] 31.3313(6) γ [°]<br>90                                    | c [Å] 16.5116(3) γ [°]<br>90                                   | c [Å] 16.4250(10) γ [°]<br>90                                 | c [Å] 31.6787(8) γ [°]<br>90                                   |
| Cell volume [Å <sup>3</sup> ]                 | 3901.56(12)                                                     | 3792.47(13)                                                    | 3936.2(4)                                                     | 4065.02(18)                                                    |
| Z                                             | 8                                                               | 8                                                              | 8                                                             | 8                                                              |
| Calculated density<br>[g/ml]                  | 1.522                                                           | 1.508                                                          | 1.440                                                         | 1.446                                                          |
| Absorption coefficient<br>[mm <sup>-1</sup> ] | 4.833                                                           | 3.761                                                          | 0.390                                                         | 3.489                                                          |
| F (000)                                       | 1824                                                            | 1760                                                           | 1760                                                          | 1824                                                           |
| Range Θ [°]                                   | 2.82 – 77.92                                                    | 3.95 – 77.49                                                   | 2.49 – 36.46                                                  | 5.61 – 75.80                                                   |
| Array bounds                                  | -20 ≤ h ≤ 18                                                    | -18 ≤ h ≤ 18                                                   | -54 ≤ h ≤ 57                                                  | -19 ≤ h ≤ 20                                                   |
|                                               | -9 ≤ k ≤ 9                                                      | -19 ≤ k ≤ 16                                                   | -12 ≤ k ≤ 12                                                  | -10 ≤ k ≤ 9                                                    |
|                                               | -39 ≤ l ≤ 39                                                    | -20 ≤ l ≤ 17                                                   | -27 ≤ l ≤ 28                                                  | -39 ≤ l ≤ 39                                                   |
| Measured reflections                          | 34852                                                           | 13104                                                          | 61119                                                         | 29459                                                          |

|                                                   |            |            |            |            |
|---------------------------------------------------|------------|------------|------------|------------|
| Independent reflections                           | 4014       | 3606       | 9943       | 4149       |
| Observed reflections ( $I > 2\sigma(I)$ )         | 3406       | 3178       | 8067       | 3324       |
| Final R-value ( $I > 2\sigma(I)$ ) <sup>[a]</sup> | 0.0383     | 0.0558     | 0.0383     | 0.0539     |
|                                                   | 0.0986     | 0.1472     | 0.1027     | 0.1451     |
| R-value (whole data) <sup>[a]</sup>               | 0.0466     | 0.0648     | 0.0504     | 0.0681     |
|                                                   | 0.1026     | 0.1526     | 0.1118     | 0.1553     |
| Completeness                                      | 1.000      | 0.975      | 0.999      | 0.999      |
| Indep. refl./constr./parameter                    | 4014/0/262 | 3606/0/262 | 9943/0/263 | 4149/0/272 |
| Goodness-of-fit-on $F^2$ <sup>[b]</sup>           | 1.062      | 1.066      | 1.026      | 1.050      |

<sup>[a]</sup>  $R1 = \frac{\sum ||F_o| - |F_c||}{\sum |F_o|}$ ;  $wR2 = \frac{[\sum w(F_o^2 - F_c^2)^2]}{[\sum (wF_o^2)^2]}^{1/2}$ ;  $w = 1/[\sigma^2(F_o^2) + (aP)^2 + bP]$  with  $P = (F_o^2 + 2F_c^2)/3$

<sup>[b]</sup>  $Goof = S = \frac{[\sum w(F_o^2 - F_c^2)^2]}{(m-n)^{1/2}}$ .  $m$  = Number of reflexes.  $n$  = Number of parameter.

Table 5. Crystal data parameters for compounds **3g**, **3o**, **3p** and **3h**.

|                               | <b>3g</b>                                                       | <b>3o</b>                                          | <b>3p</b>                                         | <b>3h</b>                                                      |
|-------------------------------|-----------------------------------------------------------------|----------------------------------------------------|---------------------------------------------------|----------------------------------------------------------------|
| CCDC No.                      | 2335542                                                         | 2345948                                            | 2345958                                           | 2335553                                                        |
| Molecular formula             | C <sub>22</sub> H <sub>11</sub> Cl <sub>2</sub> NS <sub>3</sub> | C <sub>22</sub> H <sub>11</sub> ClFNS <sub>3</sub> | C <sub>23</sub> H <sub>14</sub> CINS <sub>3</sub> | C <sub>22</sub> H <sub>11</sub> F <sub>2</sub> NS <sub>3</sub> |
| Molecular weight [g/mol]      | 456.40                                                          | 439.95                                             | 435.98                                            | 423.50                                                         |
| Crystal shape and color       | block, yellow                                                   | block, orange                                      | block, yellow                                     | block, yellow                                                  |
| Size [mm]                     | -                                                               | 0.19 × 0.13 × 0.11                                 | 0.21 × 0.15 × 0.11                                | 0.2 × 0.1 × 0.1                                                |
| Temperature [K]               | 273(2)                                                          | 140(2)                                             | 100(2)                                            | 293(2)                                                         |
| Crystal system                | orthorhombic                                                    | monoclinic                                         | orthorhombic                                      | monoclinic                                                     |
| Space group                   | <i>Pca</i> 2 <sub>1</sub>                                       | <i>P</i> 2 <sub>1</sub> / <i>n</i>                 | <i>Pccn</i>                                       | <i>P</i> 2/ <i>c</i>                                           |
| Lattice parameters [Å]        | a [Å] 7.8377(3) α [°]<br>90                                     | a [Å] 11.1576(5) α [°]<br>90                       | a [Å] 27.1805(4) α [°]<br>90                      | a [Å] 8.1876(6) α [°]<br>90                                    |
|                               | b [Å] 17.8936(4) β [°]<br>90                                    | b [Å] 13.4014(5) β [°]<br>110.654(6)               | b [Å] 17.9600(2) β [°]<br>90                      | b [Å] 8.0844(5) β [°]<br>90.247(4)                             |
|                               | c [Å] 13.6815(4) γ [°]<br>90                                    | c [Å] 13.0959(8) γ [°]<br>90                       | c [Å] 7.92650(10) γ [°]<br>90                     | c [Å] 28.1173(13) γ [°]<br>90                                  |
| Cell volume [Å <sup>3</sup> ] | 1918.76(11)                                                     | 1832.34(17)                                        | 3869.41(9)                                        | 1861.1(2)                                                      |
| Z                             | 4                                                               | 4                                                  | 8                                                 | 4                                                              |
| Calculated density [g/ml]     | 1.580                                                           | 1.595                                              | 1.497                                             | 1.511                                                          |

|                                                   |                      |                      |                      |                      |
|---------------------------------------------------|----------------------|----------------------|----------------------|----------------------|
| Absorption coefficient [mm <sup>-1</sup> ]        | 0.674                | 0.569                | 4.838                | 0.425                |
| F (000)                                           | 928                  | 896                  | 1792                 | 864                  |
| Range $\Theta$ [°]                                | 3.0 – 30.3           | 1.87 – 32.12         | 2.94 – 76.02         | 3.5 – 20.5           |
| Array bounds                                      | -11 $\leq h \leq 10$ | -16 $\leq h \leq 13$ | -34 $\leq h \leq 32$ | -9 $\leq h \leq 7$   |
|                                                   | -25 $\leq k \leq 18$ | -16 $\leq k \leq 17$ | -22 $\leq k \leq 16$ | -9 $\leq k \leq 8$   |
|                                                   | -18 $\leq l \leq 19$ | -16 $\leq l \leq 11$ | -9 $\leq l \leq 5$   | -33 $\leq l \leq 35$ |
| Measured reflections                              | 22811                | 25761                | 15834                | 11673                |
| Independent reflections                           | 5521                 | 4666                 | 3766                 | 3833                 |
| Observed reflections ( $I > 2\sigma(I)$ )         | 4572                 | 4019                 | 3486                 | 1855                 |
| Final R-value ( $I > 2\sigma(I)$ ) <sup>[a]</sup> | 0.0521               | 0.0491               | 0.0312               | 0.0592               |
|                                                   | 0.0940               | 0.1168               | 0.0782               | 0.0607               |
| R-value (whole data) <sup>[a]</sup>               | 0.0672               | 0.0582               | 0.0335               | 0.1502               |
|                                                   | 0.0984               | 0.1225               | 0.0796               | 0.0779               |
| Completeness                                      | 0.999                | 0.998                | 0.999                | 0.992                |
| Indep. refl./constr./parameter                    | 5521/1/254           | 4666/216/302         | 3766/92/307          | 3833/0/254           |
| Goodness-of-fit-on $F^2$ <sup>[b]</sup>           | 1.146                | 1.062                | 1.033                | 1.024                |

<sup>[a]</sup>  $R1 = \frac{\sum ||F_o| - |F_c||}{\sum |F_o|}$ ;  $wR2 = \frac{[\sum w(F_o^2 - F_c^2)^2]}{[\sum (wF_o^2)^2]}^{1/2}$ ;  $w = 1/[\sigma^2(F_o^2) + (aP)^2 + bP]$  with  $P = (F_o^2 + 2F_c^2)/3$

<sup>[b]</sup>  $Goof = S = \frac{[\sum w(F_o^2 - F_c^2)^2]}{(m-n)^{1/2}}$ .  $m$  = Number of reflexes.  $n$  = Number of parameter.

Table 6. Crystal data parameters for compounds **3r**, **3i**, **3t** and **3j**.

|                          | <b>3r</b>                                        | <b>3i</b>                                       | <b>3t</b>                                        | <b>3j</b>                                                      |
|--------------------------|--------------------------------------------------|-------------------------------------------------|--------------------------------------------------|----------------------------------------------------------------|
| CCDC No.                 | 2345985                                          | 2345957                                         | 2345992                                          | 2345956                                                        |
| Molecular formula        | C <sub>23</sub> H <sub>14</sub> NFS <sub>3</sub> | C <sub>24</sub> H <sub>17</sub> NS <sub>3</sub> | C <sub>24</sub> H <sub>17</sub> NOS <sub>3</sub> | C <sub>24</sub> H <sub>17</sub> NO <sub>2</sub> S <sub>3</sub> |
| Molecular weight [g/mol] | 419.53                                           | 415.57                                          | 431.57                                           | 447.57                                                         |
| Crystal shape and color  | block, yellow                                    | block, yellow                                   | block, yellow                                    | block, orange                                                  |
| Size [mm]                | 0.16 × 0.12 × 0.07                               | 0.28 × 0.19 × 0.07                              | 0.23 × 0.19 × 0.14                               | 0.36 × 0.31 × 0.25                                             |
| Temperature [K]          | 120(2)                                           | 100(2)                                          | 200(2)                                           | 140(2)                                                         |
| Crystal system           | triclinic                                        | orthorhombic                                    | orthorhombic                                     | monoclinic                                                     |
| Space group              | $P\bar{1}$                                       | $Pccn$                                          | $Pccn$                                           | $P2_1/c$                                                       |

|                                                  |                                       |                               |                               |                                     |
|--------------------------------------------------|---------------------------------------|-------------------------------|-------------------------------|-------------------------------------|
| Lattice parameters [Å]                           | a [Å] 7.61560(10) α [°]<br>113.890(2) | a [Å] 27.1441(3) α [°]<br>90  | a [Å] 27.9531(5) α [°]<br>90  | a [Å] 14.2151(17) α [°]<br>90       |
|                                                  | b [Å] 16.4902(3) β [°]<br>101.842(2)  | b [Å] 17.9997(2) β [°]<br>90  | b [Å] 18.0208(3) β [°]<br>90  | b [Å] 18.240(2) β [°]<br>105.399(3) |
|                                                  | c [Å] 16.9288(3) γ [°]<br>91.0860(10) | c [Å] 8.00280(10) γ [°]<br>90 | c [Å] 8.03800(10) γ [°]<br>90 | c [Å] 8.0477(9) γ [°]<br>90         |
| Cell volume [Å <sup>3</sup> ]                    | 1890.04(6)                            | 3910.05(8)                    | 4049.04(11)                   | 2011.8(4)                           |
| Z                                                | 4                                     | 8                             | 8                             | 4                                   |
| Calculated density [g/ml]                        | 1.474                                 | 1.412                         | 1.416                         | 1.478                               |
| Absorption coefficient [mm <sup>-1</sup> ]       | 3.737                                 | 3.530                         | 3.469                         | 0.391                               |
| F (000)                                          | 864                                   | 1728                          | 1792                          | 928                                 |
| Range Θ [°]                                      | 2.93 – 77.57                          | 2.92 – 75.75                  | 2.89 – 75.85                  | 2.68 – 37.46                        |
| Array bounds                                     | -9 ≤ h ≤ 9                            | -32 ≤ h ≤ 33                  | -34 ≤ h ≤ 31                  | -22 ≤ h ≤ 22                        |
|                                                  | -20 ≤ k ≤ 19                          | -22 ≤ k ≤ 21                  | -17 ≤ k ≤ 22                  | -28 ≤ k ≤ 28                        |
|                                                  | -17 ≤ l ≤ 21                          | -9 ≤ l ≤ 9                    | -10 ≤ l ≤ 9                   | -12 ≤ l ≤ 12                        |
| Measured reflections                             | 35586                                 | 15679                         | 37355                         | 123223                              |
| Independent reflections                          | 7728                                  | 3747                          | 4177                          | 8050                                |
| Observed reflections (I > 2σ(I))                 | 6697                                  | 3476                          | 3518                          | 7090                                |
| Final R-value (I > 2σ(I)) <sup>[a]</sup>         | 0.0466                                | 0.0322                        | 0.0442                        | 0.0337                              |
|                                                  | 0.1281                                | 0.0845                        | 0.1199                        | 0.0881                              |
| R-value (whole data) <sup>[a]</sup>              | 0.0523                                | 0.0347                        | 0.0522                        | 0.0388                              |
|                                                  | 0.1324                                | 0.0864                        | 0.1259                        | 0.0918                              |
| Completeness                                     | 0.999                                 | 0.999                         | 1.000                         | 0.999                               |
| Indep. refl./constr./parameter                   | 7728/150/654                          | 3747/0/256                    | 4177/0/264                    | 8050/0/273                          |
| Goodness-of-fit-on F <sup>2</sup> <sub>[b]</sub> | 1.101                                 | 1.050                         | 1.038                         | 1.033                               |

<sup>[a]</sup> R1 =  $\sum ||F_o| - |F_c|| / \sum |F_o|$ ; wR2 =  $[\sum (w(F_o^2 - F_c^2))^2 / \sum (wF_o^2)^2]^{1/2}$ ; w =  $1/[\sigma^2(F_o^2) + (aP)^2 + bP]$  with P =  $(F_o^2 + 2F_c^2)/3$

<sup>[b]</sup> GooF = S =  $[\sum (w(F_o^2 - F_c^2))^2 / (m-n)]^{1/2}$ . m = Number of reflexes. n = Number of parameter.

Table 7. Crystal data parameters for compounds **4a**, **4b** and **4d**.

|          | <b>4a</b> | <b>4b</b> | <b>4d</b> |
|----------|-----------|-----------|-----------|
| CCDC No. | 2345944   | 2346000   | 2345986   |

|                                                   |                                                                 |                                                                    |                                                                                |
|---------------------------------------------------|-----------------------------------------------------------------|--------------------------------------------------------------------|--------------------------------------------------------------------------------|
| Molecular formula                                 | C <sub>23</sub> H <sub>13</sub> Br <sub>2</sub> NS <sub>3</sub> | C <sub>23</sub> H <sub>12</sub> Br <sub>2</sub> CINOS <sub>3</sub> | C <sub>24</sub> H <sub>15</sub> Br <sub>2</sub> NO <sub>2</sub> S <sub>3</sub> |
| Molecular weight [g/mol]                          | 559.34                                                          | 609.79                                                             | 605.37                                                                         |
| Crystal shape and color                           | block, yellow                                                   | block, yellow                                                      | block, yellow                                                                  |
| Size [mm]                                         | 0.18 × 0.14 × 0.09                                              | 0.1 × 0.08 × 0.06                                                  | 0.22 × 0.15 × 0.1                                                              |
| Temperature [K]                                   | 100(2)                                                          | 100(2)                                                             | 150(2)                                                                         |
| Crystal system                                    | triclinic                                                       | monoclinic                                                         | monoclinic                                                                     |
| Space group                                       | <i>P</i> $\bar{1}$                                              | <i>I</i> 2/a                                                       | <i>I</i> 2/a                                                                   |
| Lattice parameters [Å]                            | a [Å] 11.9165(2) $\alpha$ [°]<br>88.1270(10)                    | a [Å] 7.4566(2) $\alpha$ [°] 90                                    | a [Å] 7.39050(10) $\alpha$ [°] 90                                              |
|                                                   | b [Å] 13.0397(2) $\beta$ [°]<br>89.7700(10)                     | b [Å] 17.8566(4) $\beta$ [°]<br>100.776(2)                         | b [Å] 17.8599(3) $\beta$ [°]<br>97.270(2)                                      |
|                                                   | c [Å] 14.2173(2) $\gamma$ [°]<br>70.184(2)                      | c [Å] 16.8039(4) $\gamma$ [°] 90                                   | c [Å] 17.1558(3) $\gamma$ [°] 90                                               |
| Cell volume [Å <sup>3</sup> ]                     | 2077.21(6)                                                      | 2197.98(9)                                                         | 2246.25(6)                                                                     |
| Z                                                 | 4                                                               | 4                                                                  | 4                                                                              |
| Calculated density [g/ml]                         | 1.789                                                           | 1.843                                                              | 1.790                                                                          |
| Absorption coefficient [mm <sup>-1</sup> ]        | 7.849                                                           | 8.608                                                              | 7.383                                                                          |
| F (000)                                           | 1104                                                            | 1200                                                               | 1200                                                                           |
| Range $\Theta$ [°]                                | 3.10 – 77.75                                                    | 3.61 – 77.03                                                       | 3.50 – 77.81                                                                   |
| Array bounds                                      | -14 ≤ h ≤ 15                                                    | -8 ≤ h ≤ 9                                                         | -9 ≤ h ≤ 9                                                                     |
|                                                   | -16 ≤ k ≤ 15                                                    | -21 ≤ k ≤ 21                                                       | -22 ≤ k ≤ 16                                                                   |
|                                                   | -18 ≤ l ≤ 17                                                    | -20 ≤ l ≤ 21                                                       | -21 ≤ l ≤ 21                                                                   |
| Measured reflections                              | 56317                                                           | 19788                                                              | 21344                                                                          |
| Independent reflections                           | 8243                                                            | 2287                                                               | 2376                                                                           |
| Observed reflections<br>(I > 2 $\sigma$ (I))      | 7452                                                            | 2177                                                               | 2189                                                                           |
| Final R-value (I > 2 $\sigma$ (I)) <sup>[a]</sup> | 0.0393                                                          | 0.0888                                                             | 0.0369                                                                         |
|                                                   | 0.1083                                                          | 0.1936                                                             | 0.1018                                                                         |
| R-value (whole data) <sup>[a]</sup>               | 0.0438                                                          | 0.0915                                                             | 0.0393                                                                         |
|                                                   | 0.1154                                                          | 0.1945                                                             | 0.1036                                                                         |
| Completeness                                      | 0.998                                                           | 1.000                                                              | 1.000                                                                          |
| Indep. refl./constr./parameter                    | 8243/0/525                                                      | 2287/36/157                                                        | 2376/0/148                                                                     |
| Goodness-of-fit-on F <sup>2</sup> <sup>[b]</sup>  | 1.112                                                           | 1.184                                                              | 1.075                                                                          |

<sup>[a]</sup> R1 =  $\sum ||F_o| - |F_c|| / \sum |F_o|$ ; wR2 =  $[\sum (w(F_o^2 - F_c^2))^2 / \sum (w(F_o^2))^2]^{1/2}$ ; w =  $1/[\sigma^2(F_o^2) + (aP)^2 + bP]$  with P =  $(F_o^2 + 2F_c^2)/3$

<sup>[b]</sup> GooF = S =  $[\sum (w(F_o^2 - F_c^2))^2 / (m - n)]^{1/2}$ . m = Number of reflexes. n = Number of parameter.

## 3.2 Superimposed crystal packing patterns

The superordinate crystal packing patterns as well as Hirshfeld surface analyses are depicted for selected derivatives. More details for those and all other derivatives of **3** and **4** can be extracted from the attached cif files.

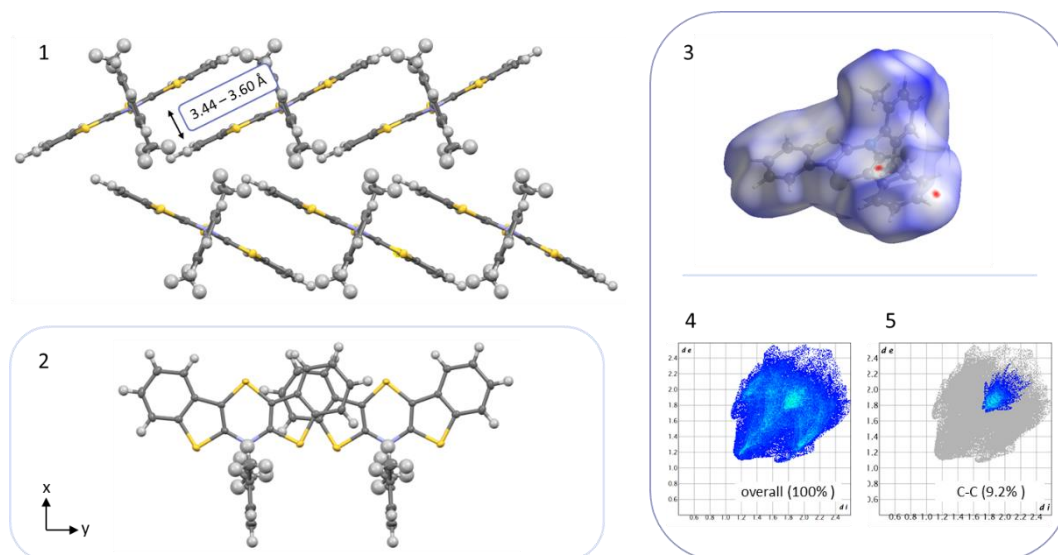

Figure 56. 1) Section of the crystal packing pattern of *anti-anti-N-ortho,ortho'*-dimethylphenyl-BBTT **3i** in the side view. 2) Section of the crystal packing pattern of *anti-anti-N-ortho,ortho'*-dimethylphenyl-BBTT **3i** in the top view. 3-5) Graphical depiction of the the Hirshfeld surface with their respective fingerprint diagrams.

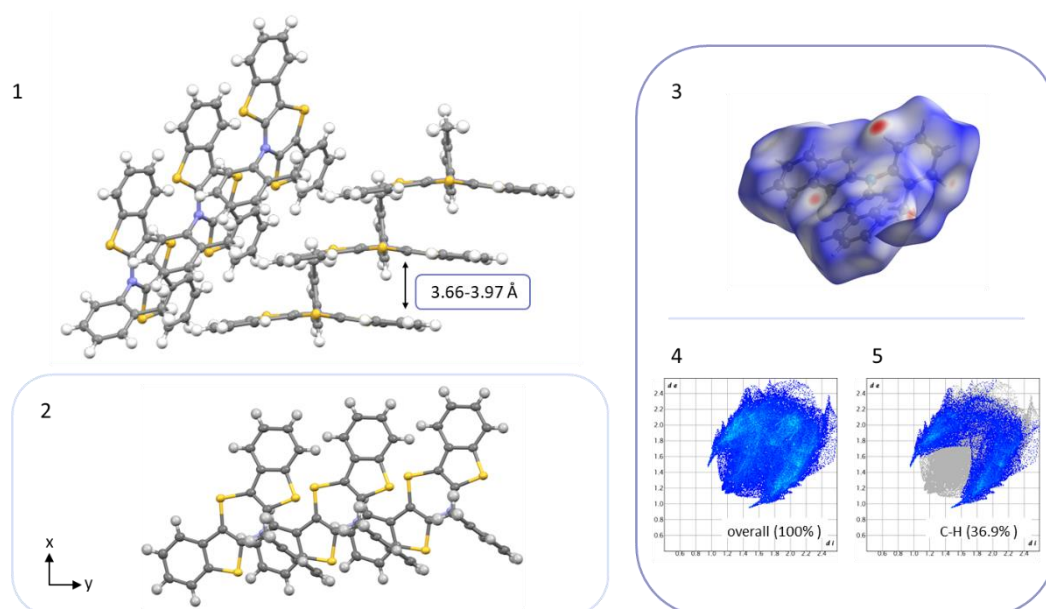

Figure 57. 1) Section of the crystal packing pattern of *anti-anti-N-ortho*-methylphenyl-BBTT **3d** in the side view. 2) Section of the crystal packing pattern of *anti-anti-N-ortho*-methylphenyl-BBTT **3d** in the top view. 3-5) Graphical depiction of the the Hirshfeld surface with their respective fingerprint diagrams.

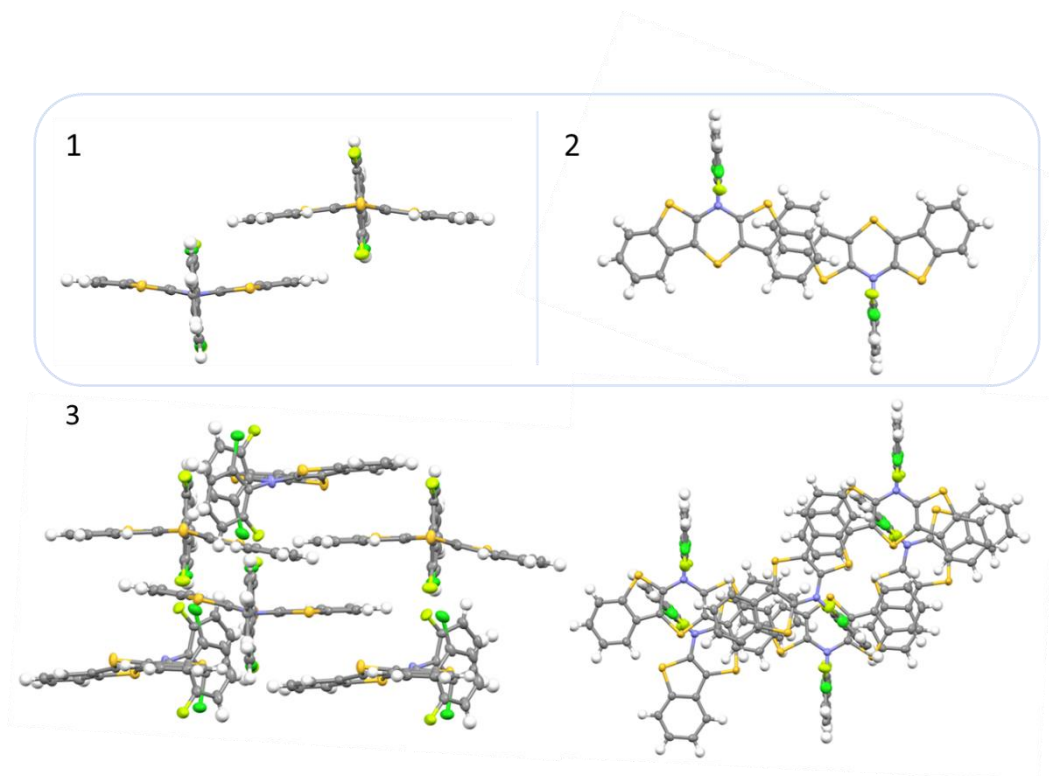

Figure 58. 1) Section of the crystal packing pattern of *anti-anti-N-ortho,ortho'*-chlorfluorophenyl-BBTT **3o** in the side view. 2) Section of the crystal packing pattern of *anti-anti-N-ortho,ortho'*-chlorfluorophenyl-BBTT **3o** in the top view. 3) Sections of the crystal packing pattern of *anti-anti-N-ortho,ortho'*-chlorfluorophenyl-BBTT **3o**.

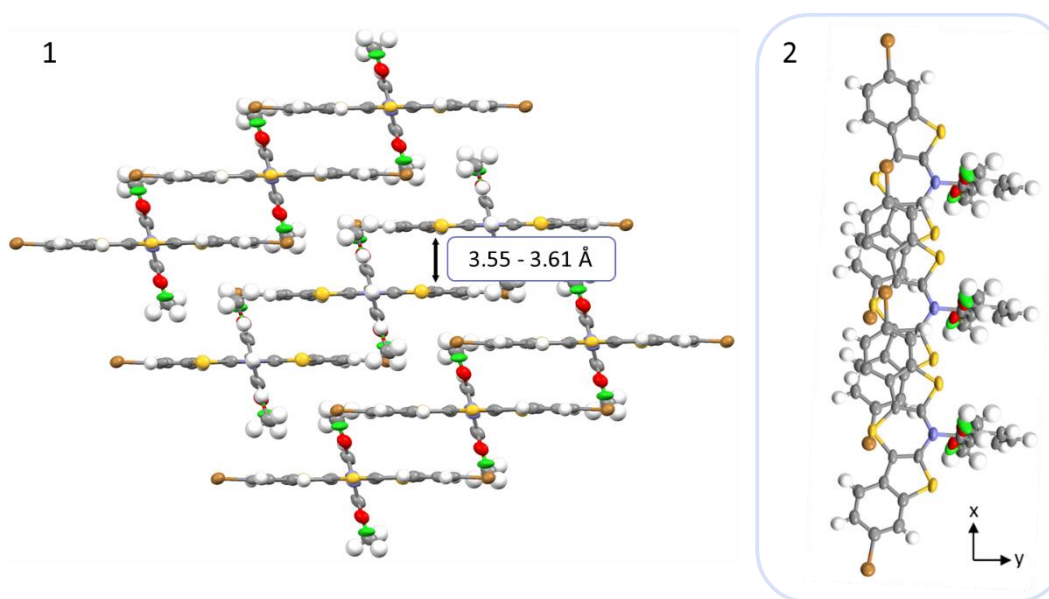

Figure 59. 1) Section of the crystal packing pattern of *anti-anti-N-ortho,ortho'*-chlormethoxyphenyl-3,9-dibromo-BBTT **4b** in the side view. 2) Section of the crystal packing pattern of *anti-anti-N-ortho,ortho'*-chlormethoxyphenyl-3,9-dibromo-BBTT **4b** in the top view.

### 3.3 NICS-calculations

The employed DFT-calculations for producing the NICS values were used as given in the literature by the GIAO method.<sup>7, 8</sup>

Table 8: Quantum chemically calculated NICS-values of the roughly fully planarized BBTT **3a**, **3g**, **3p**, **3h** and **3i** (B3LYP/6-311+G\*\*). The ghost atoms are located in the center of each of the assigned rings 1-3.

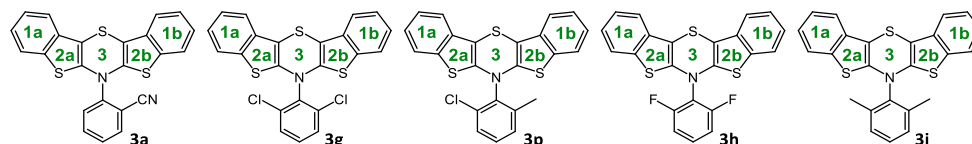

| no.       | NICS <sub>iso</sub> (0/+1/-1) |                             |                                             |                                              |                                              | ring current<br>(aromaticity)              |                             |                           |
|-----------|-------------------------------|-----------------------------|---------------------------------------------|----------------------------------------------|----------------------------------------------|--------------------------------------------|-----------------------------|---------------------------|
|           | 3a                            | 3g                          | 3p                                          | 3h                                           | 3i                                           |                                            |                             |                           |
| <b>1a</b> | -8.41/<br>-10.23/<br>-10.22   | -8.37/<br>-10.31/<br>-10.25 | -8.53/-10.28<br>/-10.27<br>(Conformer<br>I) | -8.54/-10.29<br>/-10.34<br>(Conformer<br>II) | -8.56/<br>-10.47/<br>-10.36                  | -8.59/<br>-10.29/<br>-10.38                | diatropic<br>(aromatic)     |                           |
|           | <b>1b</b>                     | -8.60/<br>-10.42/<br>-10.25 | -8.53/<br>-10.43/<br>-10.37                 | -8.64/-10.43<br>/-10.36<br>(Conformer<br>I)  | -8.63/-10.41<br>/-10.35<br>(Conformer<br>II) | -8.34/<br>-10.20/<br>-10.32                | -8.39/<br>-10.22/<br>-10.17 | diatropic<br>(aromatic)   |
|           |                               | <b>2a</b>                   | -9.16/<br>-6.95/<br>-7.07                   | -9.74/<br>-7.64/<br>-7.63                    | -9.34/-7.29/<br>-7.17<br>(Conformer<br>I)    | -9.48/-7.27/<br>-7.25<br>(Conformer<br>II) | -9.20/<br>-6.67/<br>-7.06   | -8.93/<br>-7.12/<br>-7.36 |
| <b>2b</b> |                               |                             | -9.18/<br>-7.03/<br>-7.47                   | -9.57/<br>-7.56/<br>-7.56                    | -9.47/-7.62/<br>-7.41<br>(Conformer<br>I)    | -9.29/-7.53/<br>-7.29<br>(Conformer<br>II) | -9.14/<br>-6.90/<br>-7.32   | -9.20/<br>-7.06/<br>-7.02 |
|           | <b>3</b>                      |                             | 7.05/6.42<br>/<br>6.37                      | 7.17/6.49<br>/<br>6.65                       | 7.32/6.70/<br>6.66<br>(Conformer<br>I)       | 7.35/6.84/<br>6.56<br>(Conformer<br>II)    | 7.00/6.30<br>/6.64          | 7.60/6.85<br>/6.95        |

Table 9: Quantum chemically calculated NICS-values of the roughly fully planarized BBTT **4a**, **4b** and **4d** (B3LYP/6-311+G\*\*). The ghost atoms are located in the center of each of the assigned rings 1-3.

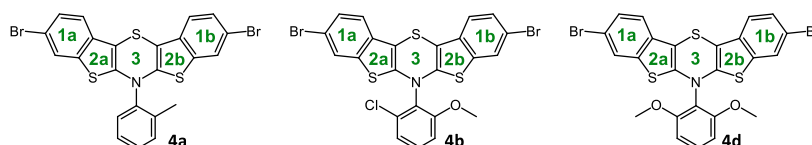



| no.       | NICS <sub>iso</sub> (0/+1/-1)          |                                          |                                        |                                         |                       | ring current<br>(aromaticity) |
|-----------|----------------------------------------|------------------------------------------|----------------------------------------|-----------------------------------------|-----------------------|-------------------------------|
|           | 4a                                     |                                          | 4b                                     |                                         | 4d                    |                               |
| <b>1a</b> | -8.87/-9.71/<br>-9.78<br>(Conformer I) | -8.91/-10.09/<br>-9.88<br>(Conformer II) | -9.63/-7.50/<br>-7.54<br>(Conformer I) | -9.39/-7.62/<br>-7.48<br>(Conformer II) | -8.91/-9.58/<br>-9.68 | diatropic<br>(aromatic)       |
| <b>1b</b> | -8.67/-9.39/<br>-9.93<br>(Conformer I) | -8.78/-9.83/<br>-9.73<br>(Conformer II)  | -9.39/-7.48/<br>-7.62<br>(Conformer I) | -9.63/-7.53/<br>-7.49<br>(Conformer II) | -8.91/-9.68/<br>-9.59 | diatropic<br>(aromatic)       |
| <b>2a</b> | -9.16/-6.95/<br>-7.13<br>(Conformer I) | -9.34/-7.27/<br>-6.76<br>(Conformer II)  | -8.94/-9.60/<br>-9.76<br>(Conformer I) | -8.89/-9.60/<br>-9.74<br>(Conformer II) | -9.55/-7.74/<br>-7.73 | diatropic<br>(aromatic)       |
| <b>2b</b> | -9.66/-6.97/<br>-7.13<br>(Conformer I) | -9.47/-7.27/<br>-6.68<br>(Conformer II)  | -8.89/-9.73/<br>-9.60<br>(Conformer I) | -8.94/-9.76/<br>-9.60<br>(Conformer II) | -9.54/-7.72/<br>-7.74 | diatropic<br>(aromatic)       |
| <b>3</b>  | 6.84/6.27/<br>6.22<br>(Conformer I)    | 7.06/6.47/6.2<br>1<br>(Conformer II)     | 7.94/7.18/<br>7.12<br>(Conformer I)    | 7.94/7.11/<br>7.18<br>(Conformer II)    | 7.93/7.10/<br>7.10    | paratropic<br>(antiaromatic)  |

Table 10: Quantum chemically calculated NICS<sub>iso</sub>, NICS<sub>in-plane</sub> and NICS<sub>out-of-plane</sub> values of the roughly fully planarized BBTT **3a** and **3g** (B3LYP/6-311+G\*\*). The ghost atom is located in the center of the 1,4-thiazine ring.

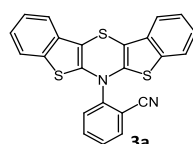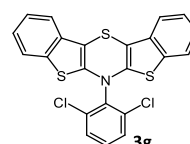

| Å          | NICS <sub>iso</sub> | NICS <sub>in-plane</sub> | NICS <sub>out-of-plane</sub> | NICS <sub>iso</sub> | NICS <sub>in-plane</sub> | NICS <sub>out-of-plane</sub> |
|------------|---------------------|--------------------------|------------------------------|---------------------|--------------------------|------------------------------|
| <b>0.0</b> | 7.0473              | -9.4684                  | 16.5157                      | 7.1675              | -9.6434                  | 16.8109                      |
| <b>0.1</b> | 7.0507              | -9.31073                 | 16.3614                      | 7.1838              | -9.4981                  | 16.6819                      |
| <b>0.2</b> | 7.0986              | -8.8515                  | 15.9501                      | 7.2486              | -9.04457                 | 16.2932                      |
| <b>0.3</b> | 7.1726              | -8.13233                 | 15.3049                      | 7.3381              | -8.3278                  | 15.6659                      |
| <b>0.4</b> | 7.2445              | -7.21643                 | 14.461                       | 7.4199              | -7.4136                  | 14.8335                      |
| <b>0.5</b> | 7.2842              | -6.178                   | 13.4622                      | 7.4607              | -6.37787                 | 13.8386                      |
| <b>0.6</b> | 7.2654              | -5.0915                  | 12.3569                      | 7.4338              | -5.29563                 | 12.7294                      |
| <b>0.7</b> | 7.171               | -4.02257                 | 11.1936                      | 7.3228              | -4.23227                 | 11.555                       |
| <b>0.8</b> | 6.9945              | -3.02227                 | 10.0168                      | 7.1232              | -3.23827                 | 10.3614                      |

|            |        |           |            |        |           |           |
|------------|--------|-----------|------------|--------|-----------|-----------|
| <b>0.9</b> | 6.7394 | -2.12473  | 8.8641     | 6.8408 | -2.34727  | 9.18807   |
| <b>1.0</b> | 6.4164 | -1.34817  | 7.76453    | 6.4888 | -1.57723  | 8.06607   |
| <b>1.1</b> | 6.0408 | -0.6975   | 6.73827    | 6.0842 | -0.9334   | 7.0176    |
| <b>1.2</b> | 5.6294 | -0.168133 | 5.79753    | 5.6449 | -0.411433 | 6.05633   |
| <b>1.3</b> | 5.1984 | 0.250767  | 4.94767    | 5.1876 | -0.0012   | 5.18877   |
| <b>1.4</b> | 4.7622 | 0.573333  | 4.18893    | 4.7266 | 0.310833  | 4.41577   |
| <b>1.5</b> | 4.3326 | 0.8147    | 3.5179     | 4.2733 | 0.5392    | 3.7341    |
| <b>1.6</b> | 3.9186 | 0.989733  | 2.9289     | 3.8363 | 0.698467  | 3.13787   |
| <b>1.7</b> | 3.5268 | 1.11193   | 2.4149     | 3.4219 | 0.802167  | 2.6197    |
| <b>1.8</b> | 3.1615 | 1.19307   | 1.96847    | 3.034  | 0.8625    | 2.17147   |
| <b>1.9</b> | 2.8251 | 1.243     | 1.5821     | 2.6751 | 0.8901    | 1.785     |
| <b>2.0</b> | 2.5184 | 1.26973   | 1.2487     | 2.3465 | 0.8941    | 1.4524    |
| <b>2.1</b> | 2.2411 | 1.27947   | 0.9616     | 2.0483 | 0.8821    | 1.1662    |
| <b>2.2</b> | 1.9918 | 1.27693   | 0.714867   | 1.78   | 0.860333  | 0.919667  |
| <b>2.3</b> | 1.7688 | 1.2657    | 0.5031     | 1.5404 | 0.8338    | 0.706633  |
| <b>2.4</b> | 1.5697 | 1.24827   | 0.321467   | 1.328  | 0.806233  | 0.5217    |
| <b>2.5</b> | 1.3923 | 1.22647   | 0.165833   | 1.1407 | 0.780567  | 0.360167  |
| <b>2.6</b> | 1.234  | 1.20157   | 0.0324333  | 0.9766 | 0.758733  | 0.2179    |
| <b>2.7</b> | 1.0927 | 1.17453   | -0.0818667 | 0.8334 | 0.741933  | 0.0914667 |
| <b>2.8</b> | 0.9662 | 1.14613   | -0.179933  | 0.709  | 0.730867  | -0.0219   |
| <b>2.9</b> | 0.8528 | 1.11693   | -0.264133  | 0.601  | 0.725533  | -0.1245   |
| <b>3.0</b> | 0.7508 | 1.0874    | -0.336533  | 0.5076 | 0.725667  | -0.2181   |
| <b>3.1</b> | 0.659  | 1.058     | -0.398967  | 0.4267 | 0.7307    | -0.304    |
| <b>3.2</b> | 0.5762 | 1.0291    | -0.452933  | 0.3567 | 0.739767  | -0.383133 |
| <b>3.3</b> | 0.5013 | 1.00093   | -0.499633  | 0.2959 | 0.752     | -0.456133 |
| <b>3.4</b> | 0.4336 | 0.973833  | -0.540233  | 0.2429 | 0.766333  | -0.5234   |
| <b>3.5</b> | 0.3723 | 0.947867  | -0.575533  | 0.1966 | 0.781767  | -0.585133 |
| <b>3.6</b> | 0.3168 | 0.923133  | -0.606267  | 0.156  | 0.7974    | -0.641433 |

|            |         |          |           |         |          |           |
|------------|---------|----------|-----------|---------|----------|-----------|
| <b>3.7</b> | 0.2666  | 0.899667 | -0.633067 | 0.1201  | 0.812467 | -0.6924   |
| <b>3.8</b> | 0.2211  | 0.877467 | -0.656367 | 0.0882  | 0.8262   | -0.738    |
| <b>3.9</b> | 0.1799  | 0.856433 | -0.676533 | 0.0598  | 0.838133 | -0.7783   |
| <b>4.0</b> | 0.1426  | 0.836467 | -0.693833 | 0.0345  | 0.847833 | -0.813367 |
| <b>4.1</b> | 0.1089  | 0.817467 | -0.708533 | 0.0118  | 0.8551   | -0.843333 |
| <b>4.2</b> | 0.0785  | 0.799333 | -0.720833 | -0.0085 | 0.8598   | -0.868333 |
| <b>4.3</b> | 0.0511  | 0.7819   | -0.7308   | -0.0267 | 0.8619   | -0.8886   |
| <b>4.4</b> | 0.0264  | 0.7651   | -0.738633 | -0.0429 | 0.861467 | -0.904367 |
| <b>4.5</b> | 0.0043  | 0.748767 | -0.744433 | -0.0572 | 0.858667 | -0.9159   |
| <b>4.6</b> | -0.0154 | 0.732867 | -0.748267 | -0.0699 | 0.8536   | -0.9235   |
| <b>4.7</b> | -0.033  | 0.717267 | -0.750267 | -0.0809 | 0.846567 | -0.9275   |
| <b>4.8</b> | -0.0486 | 0.7019   | -0.750533 | -0.0905 | 0.837733 | -0.928233 |
| <b>4.9</b> | -0.0624 | 0.686767 | -0.7492   | -0.0987 | 0.8273   | -0.926033 |
| <b>5.0</b> | -0.0745 | 0.6718   | -0.7463   | -0.1057 | 0.8155   | -0.9212   |

Table 11: Quantum chemically calculated  $\text{NICS}_{\text{iso}}$ ,  $\text{NICS}_{\text{in-plane}}$  and  $\text{NICS}_{\text{out-of-plane}}$  values of the roughly fully planarized BBTT **3h** and **3i** (B3LYP/6-311+G\*\*). The ghost atom is located in the center of the 1,4-thiazine ring.

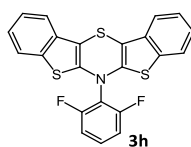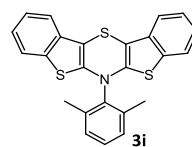

| $\text{\AA}$ | $\text{NICS}_{\text{iso}}$ | $\text{NICS}_{\text{in-plane}}$ | $\text{NICS}_{\text{out-of-plane}}$ | $\text{NICS}_{\text{iso}}$ | $\text{NICS}_{\text{in-plane}}$ | $\text{NICS}_{\text{out-of-plane}}$ |
|--------------|----------------------------|---------------------------------|-------------------------------------|----------------------------|---------------------------------|-------------------------------------|
| <b>0.0</b>   | 7.0043                     | -9.4943                         | 16.4986                             | 7.6017                     | -9.35147                        | 16.9532                             |
| <b>0.1</b>   | 6.9836                     | -9.3511                         | 16.3347                             | 7.6379                     | -9.2104                         | 16.8483                             |
| <b>0.2</b>   | 7.0139                     | -8.89737                        | 15.9113                             | 7.7116                     | -8.77503                        | 16.4867                             |
| <b>0.3</b>   | 7.0758                     | -8.17657                        | 15.2524                             | 7.7983                     | -8.08827                        | 15.8865                             |
| <b>0.4</b>   | 7.1401                     | -7.254                          | 14.3941                             | 7.867                      | -7.2116                         | 15.0786                             |
| <b>0.5</b>   | 7.1751                     | -6.20593                        | 13.3811                             | 7.8879                     | -6.21547                        | 14.1034                             |
| <b>0.6</b>   | 7.1537                     | -5.1085                         | 12.2622                             | 7.8384                     | -5.1693                         | 13.0076                             |
| <b>0.7</b>   | 7.0577                     | -4.0285                         | 11.0862                             | 7.7063                     | -4.13393                        | 11.8402                             |

|            |        |          |            |        |           |            |
|------------|--------|----------|------------|--------|-----------|------------|
| <b>0.8</b> | 6.8802 | -3.01763 | 9.89783    | 7.4905 | -3.15717  | 10.6476    |
| <b>0.9</b> | 6.6243 | -2.11043 | 8.73467    | 7.199  | -2.27183  | 9.47087    |
| <b>1.0</b> | 6.3006 | -1.32513 | 7.62577    | 6.8458 | -1.49697  | 8.34273    |
| <b>1.1</b> | 5.9245 | -0.6667  | 6.59123    | 6.4474 | -0.8399   | 7.2873     |
| <b>1.2</b> | 5.5128 | -0.1303  | 5.64307    | 6.0205 | -0.299433 | 6.31993    |
| <b>1.3</b> | 5.0816 | 0.295167 | 4.78647    | 5.58   | 0.131633  | 5.4484     |
| <b>1.4</b> | 4.6453 | 0.623933 | 4.02143    | 5.1382 | 0.463733  | 4.67443    |
| <b>1.5</b> | 4.2157 | 0.871333 | 3.34433    | 4.7043 | 0.709133  | 3.9952     |
| <b>1.6</b> | 3.8017 | 1.0523   | 2.74937    | 4.2853 | 0.880567  | 3.4047     |
| <b>1.7</b> | 3.4098 | 1.1803   | 2.22943    | 3.8855 | 0.990467  | 2.89507    |
| <b>1.8</b> | 3.0442 | 1.2672   | 1.777      | 3.5078 | 1.05057   | 2.45723    |
| <b>1.9</b> | 2.7073 | 1.3227   | 1.3846     | 3.1537 | 1.0718    | 2.08187    |
| <b>2.0</b> | 2.4    | 1.3548   | 1.0452     | 2.8237 | 1.06403   | 1.75967    |
| <b>2.1</b> | 2.1219 | 1.36967  | 0.7523     | 2.5178 | 1.03617   | 1.48167    |
| <b>2.2</b> | 1.872  | 1.372    | 0.5        | 2.2356 | 0.995867  | 1.23977    |
| <b>2.3</b> | 1.6484 | 1.3653   | 0.283133   | 1.9762 | 0.9496    | 1.02663    |
| <b>2.4</b> | 1.449  | 1.35203  | 0.097      | 1.7387 | 0.902533  | 0.836133   |
| <b>2.5</b> | 1.2716 | 1.33393  | -0.0623667 | 1.5217 | 0.8585    | 0.663233   |
| <b>2.6</b> | 1.1137 | 1.31227  | -0.198567  | 1.3242 | 0.8201    | 0.504133   |
| <b>2.7</b> | 0.9732 | 1.2879   | -0.314667  | 1.1449 | 0.788733  | 0.356133   |
| <b>2.8</b> | 0.8481 | 1.26143  | -0.413267  | 0.9824 | 0.7648    | 0.217567   |
| <b>2.9</b> | 0.7366 | 1.23337  | -0.496767  | 0.8355 | 0.748     | 0.0875333  |
| <b>3.0</b> | 0.6371 | 1.2042   | -0.567067  | 0.7032 | 0.737467  | -0.0342667 |
| <b>3.1</b> | 0.5483 | 1.17427  | -0.626     | 0.5842 | 0.732067  | -0.147833  |
| <b>3.2</b> | 0.469  | 1.1439   | -0.674967  | 0.4777 | 0.730633  | -0.252933  |
| <b>3.3</b> | 0.3982 | 1.11347  | -0.715267  | 0.3826 | 0.732     | -0.349367  |
| <b>3.4</b> | 0.3351 | 1.08313  | -0.748067  | 0.2982 | 0.735167  | -0.436933  |
| <b>3.5</b> | 0.2789 | 1.05317  | -0.7743    | 0.2236 | 0.7392    | -0.515633  |

|            |         |          |           |         |          |           |
|------------|---------|----------|-----------|---------|----------|-----------|
| <b>3.6</b> | 0.2289  | 1.02367  | -0.7948   | 0.158   | 0.743533 | -0.585533 |
| <b>3.7</b> | 0.1845  | 0.9948   | -0.8103   | 0.1006  | 0.747533 | -0.6469   |
| <b>3.8</b> | 0.1451  | 0.9666   | -0.821467 | 0.0508  | 0.7509   | -0.7001   |
| <b>3.9</b> | 0.1103  | 0.939133 | -0.8288   | 0.0078  | 0.753267 | -0.7455   |
| <b>4.0</b> | 0.0795  | 0.912367 | -0.832867 | -0.0291 | 0.754533 | -0.783667 |
| <b>4.1</b> | 0.0523  | 0.8863   | -0.834    | -0.0605 | 0.754533 | -0.815067 |
| <b>4.2</b> | 0.0283  | 0.860967 | -0.832667 | -0.0871 | 0.7532   | -0.8403   |
| <b>4.3</b> | 0.0071  | 0.836233 | -0.829133 | -0.1094 | 0.7505   | -0.859867 |
| <b>4.4</b> | -0.0116 | 0.8122   | -0.823733 | -0.1279 | 0.7464   | -0.874333 |
| <b>4.5</b> | -0.028  | 0.788767 | -0.816733 | -0.1432 | 0.741033 | -0.8842   |
| <b>4.6</b> | -0.0424 | 0.7659   | -0.808333 | -0.1556 | 0.7344   | -0.889967 |
| <b>4.7</b> | -0.0551 | 0.743667 | -0.798767 | -0.1655 | 0.7266   | -0.892067 |
| <b>4.8</b> | -0.0662 | 0.722    | -0.7882   | -0.1732 | 0.717733 | -0.890967 |
| <b>4.9</b> | -0.0759 | 0.7009   | -0.776767 | -0.1791 | 0.707933 | -0.887067 |
| <b>5.0</b> | -0.0843 | 0.680333 | -0.764667 | -0.1835 | 0.6972   | -0.880733 |

Table 12: Quantum chemically calculated  $NICS_{iso}$ ,  $NICS_{in-plane}$  and  $NICS_{out-of-plane}$  values of the roughly fully planarized BBTT **3p** (B3LYP/6-311+G\*\*). The ghost atom is located in the center of the 1,4-thiazine ring.

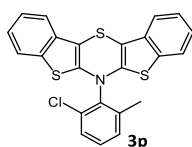

(two conformers in the asymmetric unit)

| Å          | $NICS_{iso}$ | $NICS_{in-plane}$ | $NICS_{out-of-plane}$ | $NICS_{iso}$ | $NICS_{in-plane}$ | $NICS_{out-of-plane}$ |
|------------|--------------|-------------------|-----------------------|--------------|-------------------|-----------------------|
| <b>0.0</b> | 7.3482       | -9.52603          | 16.8743               | 7.3175       | -9.5184           | 16.8359               |
| <b>0.1</b> | 7.3909       | -9.341            | 16.7319               | 7.3305       | -9.35443          | 16.685                |
| <b>0.2</b> | 7.4789       | -8.85577          | 16.3347               | 7.3922       | -8.88637          | 16.2786               |
| <b>0.3</b> | 7.5899       | -8.11393          | 15.7038               | 7.4826       | -8.1561           | 15.6387               |
| <b>0.4</b> | 7.6922       | -7.1799           | 14.8721               | 7.5713       | -7.2275           | 14.7988               |
| <b>0.5</b> | 7.7529       | -6.12853          | 13.8815               | 7.6251       | -6.17593          | 13.801                |

|            |        |           |           |        |           |            |
|------------|--------|-----------|-----------|--------|-----------|------------|
| <b>0.6</b> | 7.7445 | -5.03417  | 12.7787   | 7.6146 | -5.07757  | 12.6922    |
| <b>0.7</b> | 7.6497 | -3.9617   | 11.6113   | 7.5199 | -4        | 11.5199    |
| <b>0.8</b> | 7.463  | -2.96107  | 10.4241   | 7.3324 | -2.996    | 10.3284    |
| <b>0.9</b> | 7.1898 | -2.0653   | 9.2551    | 7.0547 | -2.10117  | 9.15587    |
| <b>1.0</b> | 6.8431 | -1.2916   | 8.13467   | 6.6979 | -1.33447  | 8.03233    |
| <b>1.1</b> | 6.4403 | -0.6441   | 7.08443   | 6.2784 | -0.700967 | 6.9794     |
| <b>1.2</b> | 6.0003 | -0.117733 | 6.118     | 5.8153 | -0.195267 | 6.01057    |
| <b>1.3</b> | 5.5406 | 0.298633  | 5.24203   | 5.3274 | 0.194733  | 5.13263    |
| <b>1.4</b> | 5.0769 | 0.619167  | 4.45777   | 4.8317 | 0.484867  | 4.34683    |
| <b>1.5</b> | 4.6216 | 0.859     | 3.76257   | 4.3428 | 0.692233  | 3.6506     |
| <b>1.6</b> | 4.1839 | 1.03287   | 3.15107   | 3.8722 | 0.833533  | 3.03863    |
| <b>1.7</b> | 3.7706 | 1.1541    | 2.6165    | 3.4282 | 0.924033  | 2.5042     |
| <b>1.8</b> | 3.3857 | 1.23443   | 2.15123   | 3.0168 | 0.977067  | 2.03973    |
| <b>1.9</b> | 3.0312 | 1.28363   | 1.74763   | 2.6413 | 1.0037    | 1.6376     |
| <b>2.0</b> | 2.7078 | 1.3096    | 1.39823   | 2.303  | 1.01277   | 1.2903     |
| <b>2.1</b> | 2.4147 | 1.3186    | 1.09607   | 2.0019 | 1.01103   | 0.990833   |
| <b>2.2</b> | 2.1503 | 1.31547   | 0.834833  | 1.7364 | 1.00357   | 0.732833   |
| <b>2.3</b> | 1.9126 | 1.30377   | 0.608867  | 1.5043 | 0.993767  | 0.5105     |
| <b>2.4</b> | 1.6992 | 1.28607   | 0.413133  | 1.3027 | 0.983933  | 0.318767   |
| <b>2.5</b> | 1.5076 | 1.26427   | 0.2433    | 1.1287 | 0.9755    | 0.153167   |
| <b>2.6</b> | 1.3353 | 1.23967   | 0.0956667 | 0.9789 | 0.969     | 0.00986667 |
| <b>2.7</b> | 1.1803 | 1.21327   | -0.033    | 0.8503 | 0.9647    | -0.114467  |
| <b>2.8</b> | 1.0403 | 1.18567   | -0.145333 | 0.74   | 0.962533  | -0.222567  |
| <b>2.9</b> | 0.9139 | 1.1575    | -0.2436   | 0.6453 | 0.962167  | -0.3168    |
| <b>3.0</b> | 0.7995 | 1.1291    | -0.3296   | 0.564  | 0.963167  | -0.399133  |
| <b>3.1</b> | 0.6959 | 1.10083   | -0.404967 | 0.494  | 0.965133  | -0.471167  |
| <b>3.2</b> | 0.602  | 1.07287   | -0.470867 | 0.4334 | 0.9676    | -0.5342    |
| <b>3.3</b> | 0.5171 | 1.04553   | -0.528433 | 0.3807 | 0.970067  | -0.589367  |

|            |         |          |           |         |          |           |
|------------|---------|----------|-----------|---------|----------|-----------|
| <b>3.4</b> | 0.4403  | 1.01883  | -0.578533 | 0.3347  | 0.9722   | -0.6375   |
| <b>3.5</b> | 0.3711  | 0.992967 | -0.6219   | 0.2942  | 0.973567 | -0.6794   |
| <b>3.6</b> | 0.3087  | 0.967867 | -0.659167 | 0.2583  | 0.9739   | -0.715633 |
| <b>3.7</b> | 0.2526  | 0.943567 | -0.6909   | 0.2262  | 0.972933 | -0.746733 |
| <b>3.8</b> | 0.2024  | 0.920033 | -0.7176   | 0.1974  | 0.9705   | -0.773133 |
| <b>3.9</b> | 0.1575  | 0.8972   | -0.7397   | 0.1712  | 0.9665   | -0.795233 |
| <b>4.0</b> | 0.1174  | 0.875067 | -0.757633 | 0.1474  | 0.9608   | -0.813367 |
| <b>4.1</b> | 0.0817  | 0.8535   | -0.771733 | 0.1257  | 0.953467 | -0.827833 |
| <b>4.2</b> | 0.0501  | 0.832433 | -0.7824   | 0.1056  | 0.944567 | -0.8389   |
| <b>4.3</b> | 0.022   | 0.8119   | -0.7899   | 0.0872  | 0.934133 | -0.8469   |
| <b>4.4</b> | -0.0028 | 0.791767 | -0.794567 | 0.0703  | 0.922333 | -0.852033 |
| <b>4.5</b> | -0.0247 | 0.771967 | -0.796667 | 0.0547  | 0.909267 | -0.854533 |
| <b>4.6</b> | -0.0439 | 0.752633 | -0.7965   | 0.0404  | 0.895133 | -0.8547   |
| <b>4.7</b> | -0.0607 | 0.7336   | -0.794267 | 0.0274  | 0.880033 | -0.8527   |
| <b>4.8</b> | -0.0754 | 0.7149   | -0.790267 | 0.0154  | 0.8642   | -0.848733 |
| <b>4.9</b> | -0.0881 | 0.696533 | -0.784633 | 0.0046  | 0.847667 | -0.843067 |
| <b>5.0</b> | -0.0991 | 0.6785   | -0.7776   | -0.0052 | 0.830633 | -0.835833 |

Table 13: Quantum chemically calculated  $\text{NICS}_{\text{iso}}$ ,  $\text{NICS}_{\text{in-plane}}$  and  $\text{NICS}_{\text{out-of-plane}}$  values of the roughly fully planarized BBTT **4a** (B3LYP/6-311+G\*\*). The ghost atom is located in the center of the 1,4-thiazine ring.

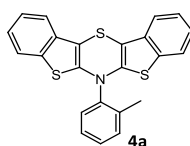

(two molecules in the asymmetric unit)

| $\text{\AA}$ | $\text{NICS}_{\text{iso}}$ | $\text{NICS}_{\text{in-plane}}$ | $\text{NICS}_{\text{out-of-plane}}$ | $\text{NICS}_{\text{iso}}$ | $\text{NICS}_{\text{in-plane}}$ | $\text{NICS}_{\text{out-of-plane}}$ |
|--------------|----------------------------|---------------------------------|-------------------------------------|----------------------------|---------------------------------|-------------------------------------|
| <b>0.0</b>   | 6.8382                     | -9.63507                        | 16.4733                             | 7.0621                     | -9.33483                        | 16.4608                             |
| <b>0.1</b>   | 6.848                      | -9.47217                        | 16.3202                             | 7.1398                     | -9.23367                        | 16.3735                             |
| <b>0.2</b>   | 6.9                        | -9.0129                         | 15.9129                             | 7.2386                     | -8.78663                        | 16.0252                             |
| <b>0.3</b>   | 6.9765                     | -8.29673                        | 15.2733                             | 7.3361                     | -8.0988                         | 15.4349                             |

|            |        |           |            |        |            |          |
|------------|--------|-----------|------------|--------|------------|----------|
| <b>0.4</b> | 7.0511 | -7.38397  | 14.4351    | 7.4062 | -7.2284    | 14.6346  |
| <b>0.5</b> | 7.0948 | -6.34597  | 13.4407    | 7.4252 | -6.24127   | 13.6665  |
| <b>0.6</b> | 7.0821 | -5.25507  | 12.3372    | 7.3765 | -5.2028    | 12.5793  |
| <b>0.7</b> | 6.996  | -4.17597  | 11.1719    | 7.2521 | -4.17067   | 11.4227  |
| <b>0.8</b> | 6.8293 | -3.15973  | 9.98903    | 7.0531 | -3.19083   | 10.2439  |
| <b>0.9</b> | 6.5845 | -2.24167  | 8.8262     | 6.7874 | -2.29617   | 9.0835   |
| <b>1.0</b> | 6.2714 | -1.44153  | 7.71297    | 6.467  | -1.507     | 7.97403  |
| <b>1.1</b> | 5.9043 | -0.7661   | 6.6704     | 6.1058 | -0.833333  | 6.9391   |
| <b>1.2</b> | 5.4994 | -0.212167 | 5.7115     | 5.7167 | -0.277333  | 5.99403  |
| <b>1.3</b> | 5.0726 | 0.229967  | 4.84263    | 5.3113 | 0.1642     | 5.1471   |
| <b>1.4</b> | 4.6384 | 0.5736    | 4.0648     | 4.8986 | 0.4976     | 4.40103  |
| <b>1.5</b> | 4.2087 | 0.8335    | 3.37523    | 4.4854 | 0.731067   | 3.75433  |
| <b>1.6</b> | 3.7931 | 1.02433   | 2.76877    | 4.0765 | 0.8738     | 3.2027   |
| <b>1.7</b> | 3.3983 | 1.1597    | 2.23867    | 3.6752 | 0.935467   | 2.73967  |
| <b>1.8</b> | 3.0292 | 1.2515    | 1.7777     | 3.2838 | 0.926533   | 2.35727  |
| <b>1.9</b> | 2.6885 | 1.3099    | 1.37857    | 2.9044 | 0.858167   | 2.04623  |
| <b>2.0</b> | 2.3773 | 1.34317   | 1.0341     | 2.5388 | 0.742667   | 1.79617  |
| <b>2.1</b> | 2.0956 | 1.3578    | 0.7378     | 2.1892 | 0.593567   | 1.5956   |
| <b>2.2</b> | 1.8426 | 1.35897   | 0.4836     | 1.8576 | 0.425333   | 1.4323   |
| <b>2.3</b> | 1.6164 | 1.35037   | 0.2661     | 1.5468 | 0.252933   | 1.2938   |
| <b>2.4</b> | 1.4152 | 1.33473   | 0.0805     | 1.259  | 0.0907667  | 1.16827  |
| <b>2.5</b> | 1.2366 | 1.31407   | -0.0774333 | 0.9968 | -0.0486333 | 1.04547  |
| <b>2.6</b> | 1.0783 | 1.28977   | -0.211433  | 0.762  | -0.155967  | 0.917933 |
| <b>2.7</b> | 0.9381 | 1.2628    | -0.3247    | 0.5556 | -0.225767  | 0.781367 |
| <b>2.8</b> | 0.8138 | 1.23387   | -0.420067  | 0.3778 | -0.2569    | 0.6347   |
| <b>2.9</b> | 0.7036 | 1.2036    | -0.5       | 0.2276 | -0.252133  | 0.479733 |
| <b>3.0</b> | 0.6058 | 1.17237   | -0.566567  | 0.1032 | -0.216867  | 0.320033 |



|            |         |          |           |         |            |            |
|------------|---------|----------|-----------|---------|------------|------------|
| <b>3.1</b> | 0.5189  | 1.14053  | -0.6216   | 0.0019  | -0.1581    | 0.160033   |
| <b>3.2</b> | 0.4418  | 1.10853  | -0.6667   | -0.0791 | -0.0832667 | 0.00413333 |
| <b>3.3</b> | 0.3733  | 1.0765   | -0.7032   | -0.1428 | 9.66667E-4 | -0.1438    |
| <b>3.4</b> | 0.3125  | 1.04477  | -0.7323   | -0.1919 | 0.0889333  | -0.280833  |
| <b>3.5</b> | 0.2585  | 1.0135   | -0.754933 | -0.2287 | 0.1764     | -0.405067  |
| <b>3.6</b> | 0.2107  | 0.9828   | -0.772067 | -0.2551 | 0.2604     | -0.515533  |
| <b>3.7</b> | 0.1684  | 0.952833 | -0.7844   | -0.2729 | 0.339      | -0.611933  |
| <b>3.8</b> | 0.131   | 0.923633 | -0.7926   | -0.2834 | 0.411167   | -0.6946    |
| <b>3.9</b> | 0.098   | 0.8952   | -0.797267 | -0.288  | 0.476267   | -0.7643    |
| <b>4.0</b> | 0.0688  | 0.867633 | -0.798867 | -0.2879 | 0.5341     | -0.821967  |
| <b>4.1</b> | 0.043   | 0.840867 | -0.797833 | -0.284  | 0.584633   | -0.868667  |
| <b>4.2</b> | 0.0204  | 0.814933 | -0.794567 | -0.2775 | 0.627933   | -0.905467  |
| <b>4.3</b> | 0.0004  | 0.7898   | -0.7894   | -0.2691 | 0.664333   | -0.933433  |
| <b>4.4</b> | -0.0172 | 0.765433 | -0.7826   | -0.2596 | 0.694033   | -0.9536    |
| <b>4.5</b> | -0.0326 | 0.741833 | -0.774433 | -0.2494 | 0.717433   | -0.966867  |
| <b>4.6</b> | -0.0461 | 0.719    | -0.7651   | -0.2392 | 0.734967   | -0.974167  |
| <b>4.7</b> | -0.0579 | 0.696867 | -0.754833 | -0.2291 | 0.7471     | -0.976233  |
| <b>4.8</b> | -0.0683 | 0.6755   | -0.743767 | -0.2194 | 0.7544     | -0.973833  |
| <b>4.9</b> | -0.0773 | 0.6548   | -0.732067 | -0.2102 | 0.7574     | -0.9676    |
| <b>5.0</b> | -0.0851 | 0.644467 | -0.719867 | -0.2016 | 0.756567   | -0.958167  |

Table 14: Quantum chemically calculated  $\text{NICS}_{\text{iso}}$ ,  $\text{NICS}_{\text{in-plane}}$  and  $\text{NICS}_{\text{out-of-plane}}$  values of the roughly fully planarized BBTT **4b** (B3LYP/6-311+G\*\*). The ghost atom is located in the center of the 1,4-thiazine ring.

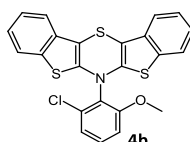

(two conformers in the asymmetric unit)

| Å | $\text{NICS}_{\text{iso}}$ | $\text{NICS}_{\text{in-plane}}$ | $\text{NICS}_{\text{out-of-plane}}$ | $\text{NICS}_{\text{iso}}$ | $\text{NICS}_{\text{in-plane}}$ | $\text{NICS}_{\text{out-of-plane}}$ |
|---|----------------------------|---------------------------------|-------------------------------------|----------------------------|---------------------------------|-------------------------------------|
|---|----------------------------|---------------------------------|-------------------------------------|----------------------------|---------------------------------|-------------------------------------|

|            |        |           |          |        |             |          |
|------------|--------|-----------|----------|--------|-------------|----------|
| <b>0.0</b> | 7.9413 | -9.6514   | 17.5927  | 7.9402 | -9.65213    | 17.5923  |
| <b>0.1</b> | 7.9859 | -9.4832   | 17.4691  | 7.9519 | -9.49737    | 17.4493  |
| <b>0.2</b> | 8.0759 | -9.00887  | 17.0848  | 8.0133 | -9.03407    | 17.0474  |
| <b>0.3</b> | 8.1845 | -8.27497  | 16.4595  | 8.1005 | -8.30697    | 16.4075  |
| <b>0.4</b> | 8.2762 | -7.3488   | 15.625   | 8.18   | -7.38247    | 15.5625  |
| <b>0.5</b> | 8.3155 | -6.30723  | 14.6228  | 8.2162 | -6.3377     | 14.5539  |
| <b>0.6</b> | 8.2746 | -5.22533  | 13.4999  | 8.1795 | -5.2491     | 13.4286  |
| <b>0.7</b> | 8.138  | -4.1674   | 12.3054  | 8.0514 | -4.18327    | 12.2346  |
| <b>0.8</b> | 7.9033 | -3.18207  | 11.0853  | 7.8259 | -3.19117    | 11.0171  |
| <b>0.9</b> | 7.5794 | -2.30057  | 9.87997  | 7.5087 | -2.30633    | 9.81503  |
| <b>1.0</b> | 7.183  | -1.53843  | 8.72147  | 7.1136 | -1.54603    | 8.65963  |
| <b>1.1</b> | 6.7345 | -0.898567 | 7.63307  | 6.6595 | -0.914033   | 7.5735   |
| <b>1.2</b> | 6.2546 | -0.375067 | 6.62963  | 6.1664 | -0.4047     | 6.57113  |
| <b>1.3</b> | 5.762  | 0.0432667 | 5.71867  | 5.6537 | -0.00626667 | 5.66     |
| <b>1.4</b> | 5.2721 | 0.3703    | 4.9018   | 5.1381 | 0.296067    | 4.84207  |
| <b>1.5</b> | 4.7968 | 0.6203    | 4.17647  | 4.6332 | 0.518033    | 4.1152   |
| <b>1.6</b> | 4.3442 | 0.806967  | 3.53723  | 4.1493 | 0.674833    | 3.4745   |
| <b>1.7</b> | 3.9196 | 0.942533  | 2.97703  | 3.6937 | 0.780233    | 2.91343  |
| <b>1.8</b> | 3.5257 | 1.0376    | 2.4881   | 3.271  | 0.8463      | 2.42467  |
| <b>1.9</b> | 3.1634 | 1.1009    | 2.06253  | 2.8838 | 0.883167    | 2.00067  |
| <b>2.0</b> | 2.8324 | 1.1397    | 1.69273  | 2.5331 | 0.899167    | 1.63393  |
| <b>2.1</b> | 2.5315 | 1.15973   | 1.37177  | 2.2185 | 0.901067    | 1.3175   |
| <b>2.2</b> | 2.2589 | 1.16563   | 1.09327  | 1.9388 | 0.894       | 1.04477  |
| <b>2.3</b> | 2.0126 | 1.16097   | 0.851667 | 1.6919 | 0.882067    | 0.8099   |
| <b>2.4</b> | 1.7905 | 1.14843   | 0.642033 | 1.4756 | 0.868133    | 0.607467 |
| <b>2.5</b> | 1.5903 | 1.13017   | 0.460167 | 1.2872 | 0.854467    | 0.4328   |
| <b>2.6</b> | 1.4101 | 1.10777   | 0.302333 | 1.1241 | 0.842467    | 0.281667 |

|            |         |          |            |        |          |           |
|------------|---------|----------|------------|--------|----------|-----------|
| <b>2.7</b> | 1.2479  | 1.08247  | 0.165433   | 0.9835 | 0.833067 | 0.150433  |
| <b>2.8</b> | 1.1019  | 1.0552   | 0.0467333  | 0.8628 | 0.826767 | 0.036     |
| <b>2.9</b> | 0.9706  | 1.02677  | -0.0561333 | 0.7594 | 0.8238   | -0.0644   |
| <b>3.0</b> | 0.8526  | 0.997767 | -0.145133  | 0.671  | 0.824    | -0.152967 |
| <b>3.1</b> | 0.7466  | 0.968667 | -0.222033  | 0.5955 | 0.827133 | -0.2316   |
| <b>3.2</b> | 0.6516  | 0.939933 | -0.288367  | 0.5309 | 0.8327   | -0.301833 |
| <b>3.3</b> | 0.5664  | 0.911833 | -0.345433  | 0.4754 | 0.840267 | -0.3649   |
| <b>3.4</b> | 0.4903  | 0.884633 | -0.394367  | 0.4273 | 0.8491   | -0.4218   |
| <b>3.5</b> | 0.4223  | 0.858533 | -0.436233  | 0.3854 | 0.8587   | -0.473267 |
| <b>3.6</b> | 0.3617  | 0.833567 | -0.4719    | 0.3485 | 0.868367 | -0.5199   |
| <b>3.7</b> | 0.3077  | 0.8099   | -0.5022    | 0.3155 | 0.877567 | -0.562067 |
| <b>3.8</b> | 0.2597  | 0.787467 | -0.527767  | 0.2857 | 0.885867 | -0.600133 |
| <b>3.9</b> | 0.2171  | 0.766367 | -0.549267  | 0.2585 | 0.892867 | -0.6343   |
| <b>4.0</b> | 0.1792  | 0.746433 | -0.567233  | 0.2334 | 0.898167 | -0.664733 |
| <b>4.1</b> | 0.1456  | 0.727667 | -0.5821    | 0.21   | 0.901633 | -0.6916   |
| <b>4.2</b> | 0.1157  | 0.709933 | -0.594267  | 0.1881 | 0.903133 | -0.715    |
| <b>4.3</b> | 0.0891  | 0.6932   | -0.604067  | 0.1676 | 0.902633 | -0.735067 |
| <b>4.4</b> | 0.0655  | 0.677333 | -0.611833  | 0.1482 | 0.900167 | -0.751933 |
| <b>4.5</b> | 0.0445  | 0.662267 | -0.6178    | 0.1301 | 0.895767 | -0.7657   |
| <b>4.6</b> | 0.0257  | 0.647867 | -0.622133  | 0.1131 | 0.889567 | -0.7765   |
| <b>4.7</b> | 0.009   | 0.634067 | -0.625067  | 0.0972 | 0.881767 | -0.784533 |
| <b>4.8</b> | -0.0059 | 0.6208   | -0.626667  | 0.0825 | 0.872433 | -0.789933 |
| <b>4.9</b> | -0.0192 | 0.607967 | -0.627167  | 0.069  | 0.861833 | -0.792867 |
| <b>5.0</b> | -0.0311 | 0.5955   | -0.626567  | 0.0565 | 0.8501   | -0.793567 |

Table 15: Quantum chemically calculated  $\text{NICS}_{\text{iso}}$ ,  $\text{NICS}_{\text{in-plane}}$  and  $\text{NICS}_{\text{out-of-plane}}$  values of the roughly fully planarized BBTT **4d** (B3LYP/6-311+G\*\*). The ghost atom is located in the center of the 1,4-thiazine ring.

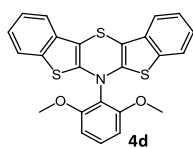

| $\text{\AA}$ | $\text{NICS}_{\text{iso}}$ | $\text{NICS}_{\text{in-plane}}$ | $\text{NICS}_{\text{out-of-plane}}$ |
|--------------|----------------------------|---------------------------------|-------------------------------------|
| <b>0.0</b>   | 7.9345                     | -9.30057                        | 17.2351                             |
| <b>0.1</b>   | 7.9625                     | -9.13967                        | 17.1022                             |
| <b>0.2</b>   | 8.0376                     | -8.672                          | 16.7097                             |
| <b>0.3</b>   | 8.1345                     | -7.94367                        | 16.0782                             |
| <b>0.4</b>   | 8.2184                     | -7.02217                        | 15.2406                             |
| <b>0.5</b>   | 8.2536                     | -5.98527                        | 14.2389                             |
| <b>0.6</b>   | 8.2112                     | -4.90933                        | 13.1205                             |
| <b>0.7</b>   | 8.0737                     | -3.86023                        | 11.9339                             |
| <b>0.8</b>   | 7.837                      | -2.88783                        | 10.7248                             |
| <b>0.9</b>   | 7.5086                     | -2.02393                        | 9.5325                              |
| <b>1.0</b>   | 7.104                      | -1.2841                         | 8.38813                             |
| <b>1.1</b>   | 6.6437                     | -0.670567                       | 7.3142                              |
| <b>1.2</b>   | 6.1487                     | -0.176167                       | 6.32487                             |
| <b>1.3</b>   | 5.6389                     | 0.211767                        | 5.42713                             |
| <b>1.4</b>   | 5.1312                     | 0.5087                          | 4.62253                             |
| <b>1.5</b>   | 4.6389                     | 0.7305                          | 3.90843                             |
| <b>1.6</b>   | 4.1716                     | 0.8921                          | 3.27953                             |
| <b>1.7</b>   | 3.7357                     | 1.00673                         | 2.729                               |
| <b>1.8</b>   | 3.3348                     | 1.08557                         | 2.24927                             |
| <b>1.9</b>   | 2.9704                     | 1.1377                          | 1.8327                              |
| <b>2.0</b>   | 2.6422                     | 1.17023                         | 1.47193                             |

|            |        |          |            |
|------------|--------|----------|------------|
| <b>2.1</b> | 2.3487 | 1.18863  | 1.16007    |
| <b>2.2</b> | 2.0878 | 1.19687  | 0.8909     |
| <b>2.3</b> | 1.8566 | 1.19777  | 0.658833   |
| <b>2.4</b> | 1.6523 | 1.19333  | 0.458967   |
| <b>2.5</b> | 1.4718 | 1.1848   | 0.287033   |
| <b>2.6</b> | 1.3124 | 1.1731   | 0.139267   |
| <b>2.7</b> | 1.1712 | 1.15877  | 0.0124667  |
| <b>2.8</b> | 1.0461 | 1.14223  | -0.0961333 |
| <b>2.9</b> | 0.9349 | 1.12383  | -0.188933  |
| <b>3.0</b> | 0.8359 | 1.10387  | -0.268     |
| <b>3.1</b> | 0.7475 | 1.08263  | -0.335133  |
| <b>3.2</b> | 0.6686 | 1.06043  | -0.391867  |
| <b>3.3</b> | 0.598  | 1.03757  | -0.439533  |
| <b>3.4</b> | 0.5349 | 1.0143   | -0.479367  |
| <b>3.5</b> | 0.4785 | 0.990933 | -0.512433  |
| <b>3.6</b> | 0.428  | 0.967633 | -0.539633  |
| <b>3.7</b> | 0.3828 | 0.944667 | -0.561833  |
| <b>3.8</b> | 0.3424 | 0.9221   | -0.579733  |
| <b>3.9</b> | 0.3062 | 0.900167 | -0.594033  |
| <b>4.0</b> | 0.2737 | 0.878933 | -0.605267  |
| <b>4.1</b> | 0.2445 | 0.858467 | -0.613933  |
| <b>4.2</b> | 0.2183 | 0.8388   | -0.6205    |
| <b>4.3</b> | 0.1946 | 0.819967 | -0.625333  |
| <b>4.4</b> | 0.1733 | 0.801933 | -0.6287    |
| <b>4.5</b> | 0.1539 | 0.784733 | -0.630867  |
| <b>4.6</b> | 0.1362 | 0.768233 | -0.632033  |
| <b>4.7</b> | 0.1201 | 0.752433 | -0.632333  |

|            |        |          |           |
|------------|--------|----------|-----------|
| <b>4.8</b> | 0.1054 | 0.7373   | -0.631933 |
| <b>4.9</b> | 0.0919 | 0.722733 | -0.630867 |
| <b>5.0</b> | 0.0794 | 0.708633 | -0.6292   |

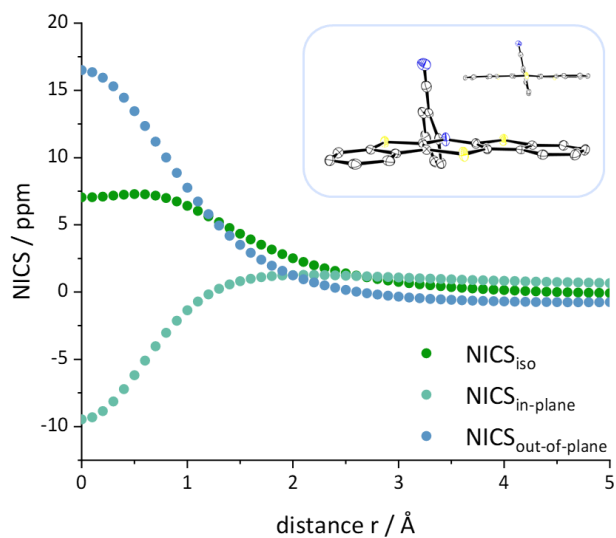

**3a**

Figure 60.  $\text{NICS}_{\text{iso}}$ ,  $\text{NICS}_{\text{in-plane}}$  and  $\text{NICS}_{\text{out-of-plane}}$  values plotted against the distance  $r$  of the ghost atom from the center of the 1,4-thiazine as well as the underlying crystal structure geometry exemplarily for **3a** (B3LYP/6-311+G\*\*).

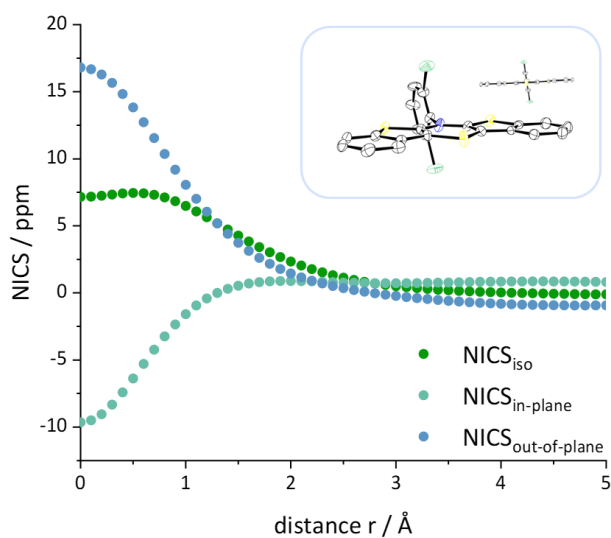

**3g**

Figure 61:  $\text{NICS}_{\text{iso}}$ ,  $\text{NICS}_{\text{in-plane}}$  and  $\text{NICS}_{\text{out-of-plane}}$  values plotted against the distance  $r$  of the ghost atom from the center of the 1,4-thiazine as well as the underlying crystal structure geometry exemplarily for **3g** (B3LYP/6-311+G\*\*).

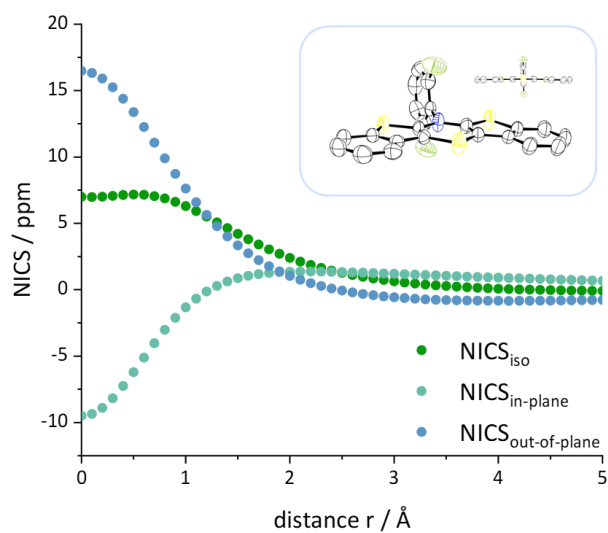

**3h**

Figure 62.  $NICS_{iso}$ ,  $NICS_{in-plane}$  and  $NICS_{out-of-plane}$  values plotted against the distance  $r$  of the ghost atom from the center of the 1,4-thiazine as well as the underlying crystal structure geometry exemplarily for **3h** (B3LYP/6-311+G\*\*).

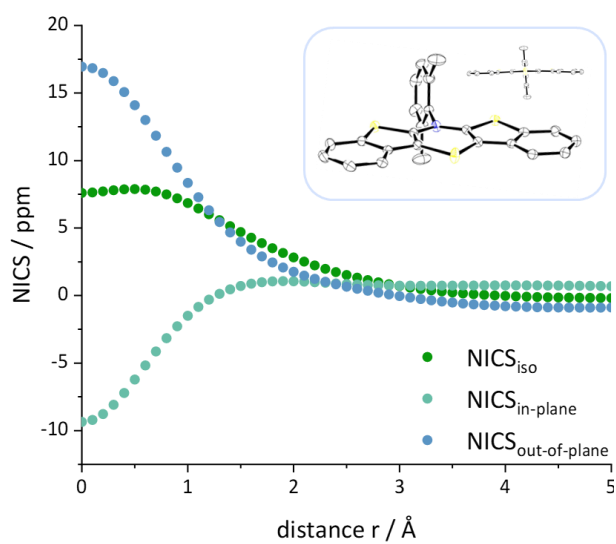

**3i**

Figure 63:  $NICS_{iso}$ ,  $NICS_{in-plane}$  and  $NICS_{out-of-plane}$  values plotted against the distance  $r$  of the ghost atom from the center of the 1,4-thiazine as well as the underlying crystal structure geometry exemplarily for **3i** (B3LYP/6-311+G\*\*).

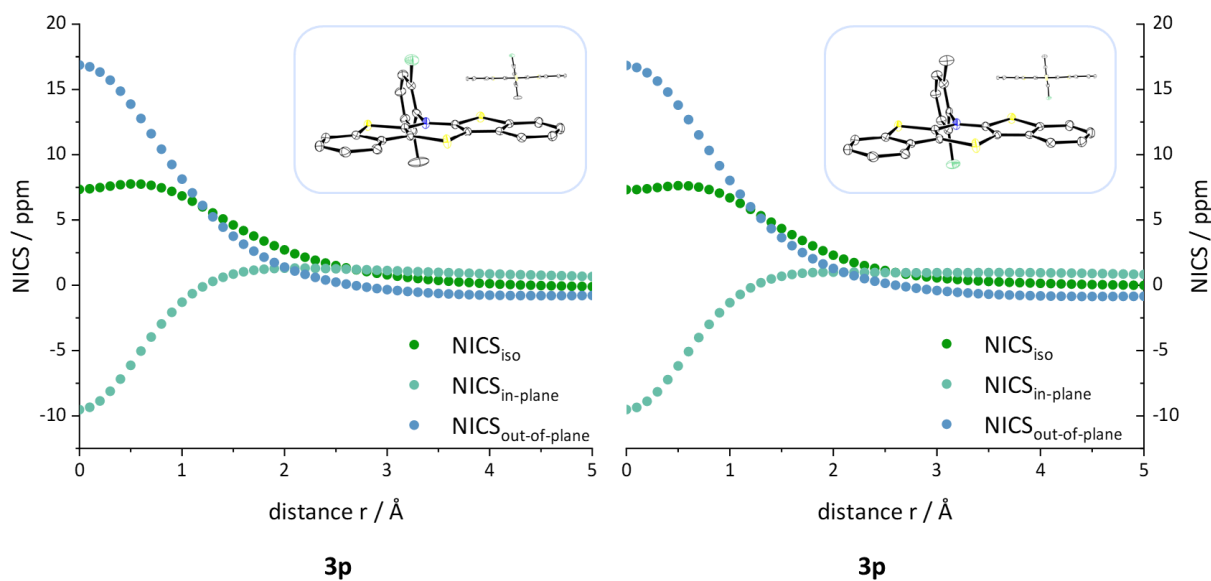

Figure 64. NICS<sub>iso</sub>, NICS<sub>in-plane</sub> and NICS<sub>out-of-plane</sub> values plotted against the distance  $r$  of the ghost atom from the center of the 1,4-thiazine as well as the underlying crystal structure geometry exemplarily for **3p** (B3LYP/6-311+G\*\*).

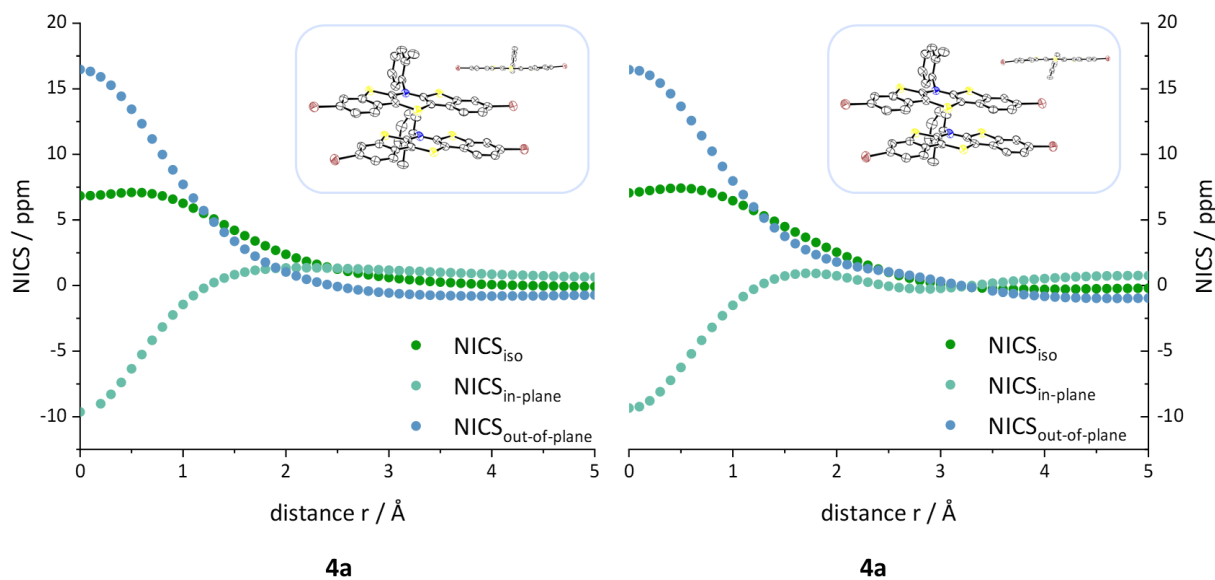

Figure 65. NICS<sub>iso</sub>, NICS<sub>in-plane</sub> and NICS<sub>out-of-plane</sub> values plotted against the distance  $r$  of the ghost atom from the center of the 1,4-thiazine as well as the underlying crystal structure geometry exemplarily for **4a** (B3LYP/6-311+G\*\*).



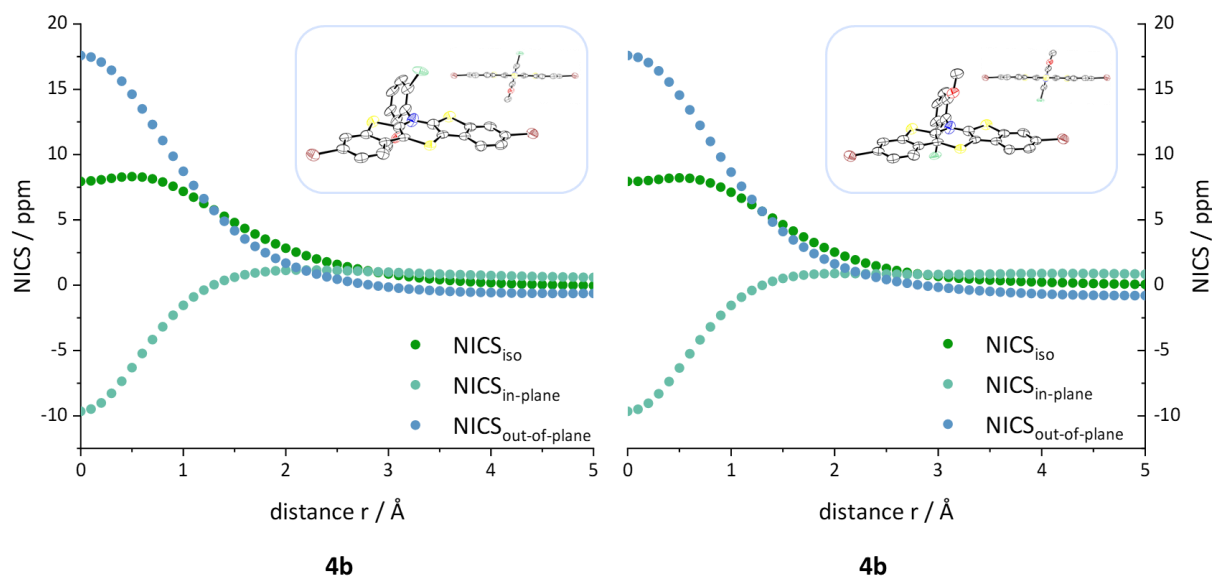

Figure 66. NICS<sub>iso</sub>, NICS<sub>in-plane</sub> and NICS<sub>out-of-plane</sub> values plotted against the distance  $r$  of the ghost atom from the center of the 1,4-thiazine as well as the underlying crystal structure geometry exemplarily for **4b** (B3LYP/6-311+G\*\*).

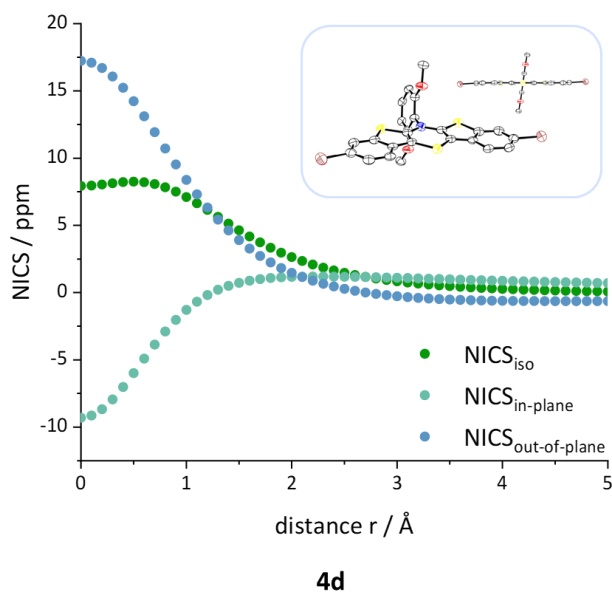

Figure 67. NICS<sub>iso</sub>, NICS<sub>in-plane</sub> and NICS<sub>out-of-plane</sub> values plotted against the distance  $r$  of the ghost atom from the center of the 1,4-thiazine as well as the underlying crystal structure geometry exemplarily for **4d** (B3LYP/6-311+G\*\*).

## 4 BBTT as a multistage redox system

### 4.1 Cyclic voltammetry

#### 4.1.1 CVs

CVs were referenced with decamethylferrocene (DMFc) as internal standard since ferrocene's (Fc) redox potential signal overlaps with signals of the redox potentials of the BBTT **3**.<sup>9-11</sup> The difference in oxidation potentials was determined with  $-546$  mV for DMFc to Fc.

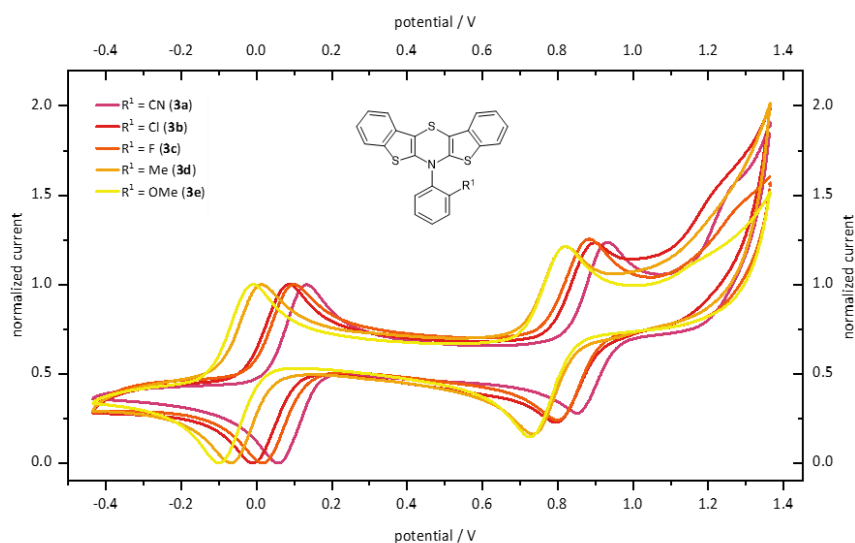

Figure 68. CVs of *anti-anti-N-ortho*-substituted-phenyl-BBTT **3a-e** (CVs recorded in  $\text{CH}_2\text{Cl}_2$ ,  $T = 298$  K,  $0.1$  M  $[\text{Bu}_4\text{N}][\text{PF}_6]$ ,  $\nu = 100$  mV/s, Pt-working- und -counter electrode, Ag/AgCl(3 M)-reference electrode, referenced with DMFc/DMFc<sup>+</sup>, potential vs. Fc/Fc<sup>+</sup> = 0.00 V).

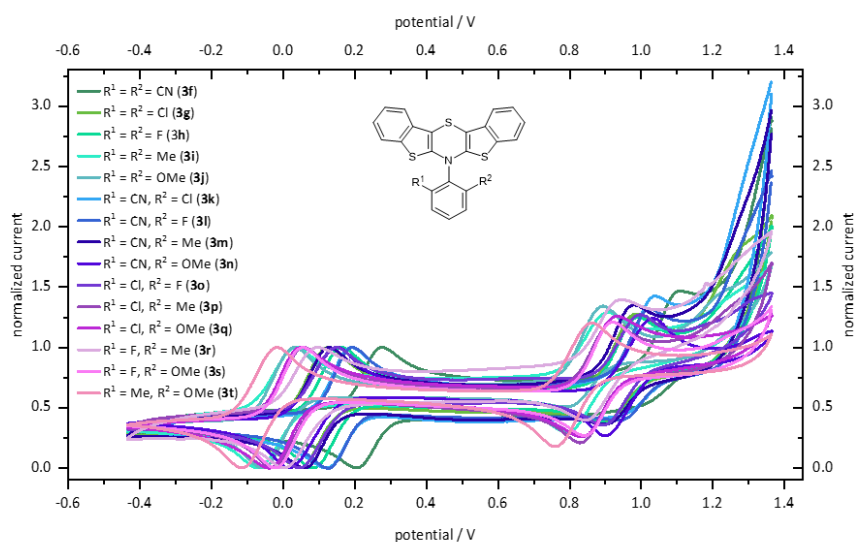

Figure 69. CVs of *anti-anti-N-ortho,ortho'*-disubstituted-phenyl-BBTT **3f-t** (CVs recorded in  $\text{CH}_2\text{Cl}_2$ ,  $T = 298$  K,  $0.1$  M  $[\text{Bu}_4\text{N}][\text{PF}_6]$ ,  $\nu = 100$  mV/s, Pt-working- und -counter electrode, Ag/AgCl(3 M)-reference electrode, referenced with DMFc/DMFc<sup>+</sup>, potential vs. Fc/Fc<sup>+</sup> = 0.00 V).

#### 4.1.2 Nernstian reversibility

The peaks in the CVs show chemical reversibility of the native and oxidized BBTT's redox couples due to formation of signals on the forward and backwards sweep, while at the same time the signal intensity does not drop when multiple cycles are measured in a row. To account for electrochemical reversibility the peak separations of both signals on the different sweeps can be used as criterion. For one-electron processes, like for BBTTs, the difference in potentials should be 59 mV. To prove the reversibility and characterize it by means of Nernstian behavior a literature known procedure was employed, as is was before for BBTT's redox behavior.<sup>6, 10</sup> Therefore redox potentials were measured at different scan rates of 100, 250, 500 and 1000 mV s<sup>-1</sup>, illuminating that BBTT's potentials shift upon increasing the scan rate. Also, the separation of peak potentials presents with values over 59 mV. Both of this indicates a quasi-reversible electrochemical behavior. Employing the standard redox samples ferrocene (Fc) and decamethylferrocene (DMFc) as test system, same behavior occurs, even though literature states them as fully Nernstian reversible.<sup>9, 10</sup> Therefore given observations seem to arise from our given setup parameters of the experiment. Literature suggests direct comparison of the values of the separation of the peak potentials of the standards Fc and DMFc with the measured samples, in this case the BBTTs, to decide on the electrochemical reversibility. To quantify this the potentials of both sweeps are plotted against the square root of the scan rate, therefore extrapolating the potentials at a scan rate of 0 mV/s by linear regression. The peak separation at 0 mV s<sup>-1</sup> can be deduced by the difference in intercepts. If the peak separation of the sample, here BBTTs, falls within the range of 59 mV and the value for the known to be Nernstian reversible standards under the measuring conditions, the samples can also be treated as Nernstian and therefore electrochemically reversible. Since the test systems reveal peak separations of 93 (Fc/Fc<sup>+</sup>) and 72 mV (DMFc/DMFc<sup>+</sup>), BBTTs with values of < 95 mV fall within the same range and can therefore be indicated as Nernstian reversible.

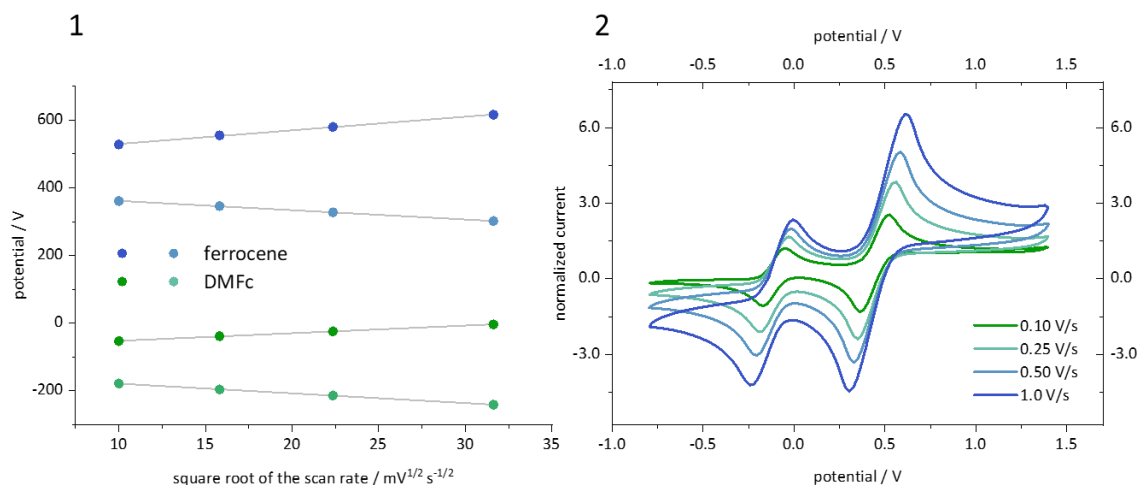

Figure 70. 1) Potentials of DMFc and Fc at  $\nu = 100, 250, 500$  and  $1000 \text{ mV s}^{-1}$  plotted against the square root of that scan rate  $\nu$ . 2) CVs of DMFc and Fc at  $\nu = 100, 250, 500$  and  $1000 \text{ mV s}^{-1}$  vs.  $\text{Ag}/\text{Ag}^+ (3 \text{ M}) = 0 \text{ mV}$ .

## 4.2 DFT-examination of radical cations

CV-data reveals an increased radical cation stability due to constitutional changes from *para*- to *ortho*- to *ortho,ortho'*-substitution pattern on the *N*-aryl moiety. Because data for all BBTTs **3** and **4** reveals this, the corresponding minimum geometries of the radical cations were computed. Extraction of the Mulliken atomic spin densities and visualization of their spin density distribution overall showed a growing delocalization of the unpaired electron as discussed in the paper. Herein the comparative discussion for the data exemplarily for radical cations of *anti-anti-N-para*-methylphenyl-BBTT, *anti-anti-N-ortho*-methylphenyl-BBTT **3d<sup>•+</sup>** and *anti-anti-N-ortho,ortho'*-methylphenyl-BBTT **3i<sup>•+</sup>** is given.

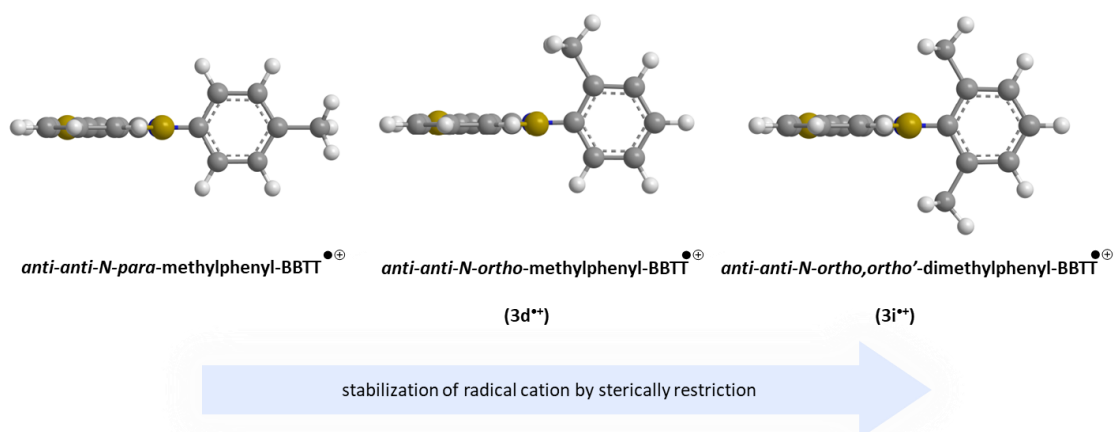

Figure 71. Radical geometries of BBTT with fully planarized BBTT's backbones exemplarily for radical cations of *anti-anti-N-para*-methylphenyl-BBTT, *anti-anti-N-ortho*-methylphenyl-BBTT **3d<sup>•+</sup>** and *anti-anti-N-ortho,ortho'*-methylphenyl-BBTT **3i<sup>•+</sup>** (uB3LYP/6 311++G\*\*, IEFPCM  $\text{CH}_2\text{Cl}_2$ ).

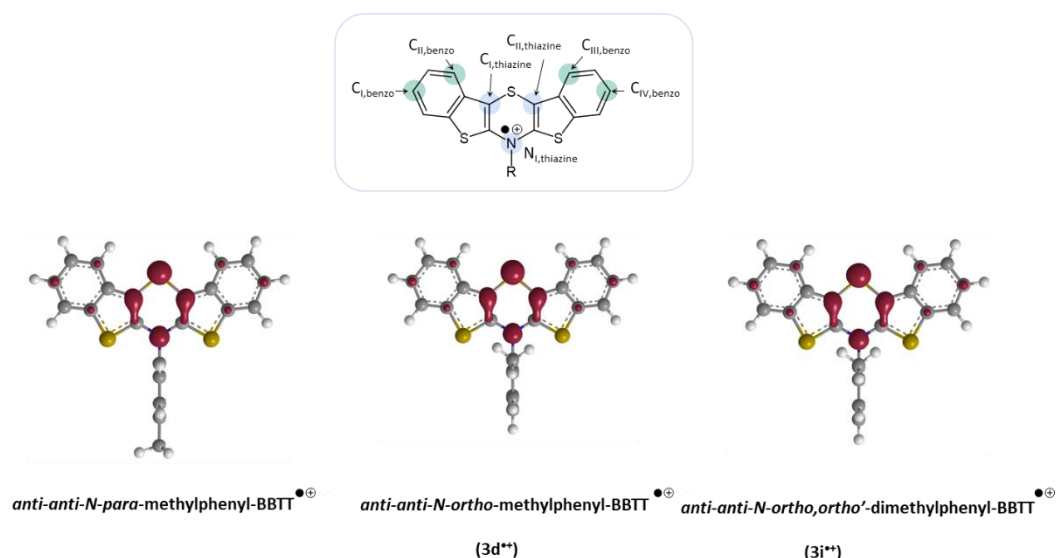

Figure 72. Quantum chemically calculated spin density distributions (uB3LYP/6 311++G\*\*, IEFPCM CH<sub>2</sub>Cl<sub>2</sub>, isosurface value = 0.06 a.u.) (bottom) and illustration of the assignment of individual atoms for extraction of Mulliken atomic spin densities exemplarily on radical cations of *anti-anti-N-para*-methylphenyl-BBTT, *anti-anti-N-ortho*-methylphenyl-BBTT **3d\*\*** and *anti-anti-N-ortho,ortho'*-methylphenyl-BBTT **3i\*\*** (top).

Table 16. Mulliken atomic spin densities exemplarily for radical cations of *anti-anti-N-para*-methylphenyl-BBTT, *anti-anti-N-ortho*-methylphenyl-BBTT **3d\*\*** and *anti-anti-N-ortho,ortho'*-methylphenyl-BBTT **3i\*\***.

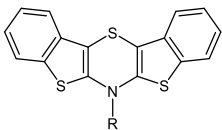

|                                                                              | N <sub>1,thiazine</sub> | C <sub>1,thiazine</sub>  | C <sub>I,benzo</sub>  | C <sub>II,benzo</sub>  |
|------------------------------------------------------------------------------|-------------------------|--------------------------|-----------------------|------------------------|
|                                                                              |                         | C <sub>II,thiazine</sub> | C <sub>IV,benzo</sub> | C <sub>III,benzo</sub> |
| <b>radical cation**</b> (R = <i>para</i> -Me-C <sub>6</sub> H <sub>4</sub> ) | 0.238                   | 0.176                    | 0.0716                | 0.0453                 |
|                                                                              |                         | 0.176                    | 0.0715                | 0.0452                 |
| <b>3d**</b> (R = <i>ortho</i> -Me-C <sub>6</sub> H <sub>4</sub> )            | 0.232                   | 0.171                    | 0.0715                | 0.0544                 |
|                                                                              |                         | 0.171                    | 0.0714                | 0.0547                 |
| <b>3i**</b> (R = <i>ortho,ortho'</i> -Me,Me-C <sub>6</sub> H <sub>3</sub> )  | 0.229                   | 0.172                    | 0.0716                | 0.0555                 |
|                                                                              |                         | 0.172                    | 0.0716                | 0.0555                 |

### 4.3 Computed SCF energies, Gibbs free energies and HOMO energies of *N*-intra-conformers and transition states

The Eyring equation was used to determine the rate constant *k* and thus the frequency of the conversion.

$$k = \frac{R T}{N_A h} e^{-\frac{\Delta G_A^\ddagger}{R T}}$$

$k$  as the rate constant with  $\Delta G_A^\ddagger$  as free activation energy of both involved conformers,  $R$  as ideal gas constant,  $T$  as temperature,  $N_A$  as Avogadro constant and  $h$  as Planck constant.

The equilibrium constant can be calculated by the connection to the Gibbs free energy.

$$\Delta G = -R T \ln(K)$$

$K$  as equilibrium constant with  $\Delta G$  as difference of Gibbs free energies of both involved conformers,  $R$  as ideal gas constant and  $T$  as temperature.

Table 17. DFT-computational minimum structures of selected conformers of BBTT **3** and **4** by  $N$ -inversion and the geometry of the corresponding planar transition state as well as the SCF energy difference  $\Delta E$  and free activation energy  $\Delta G_A^\ddagger$  of this conversion. (B3LYP/6-311++G\*\*, IEFPCM CH<sub>2</sub>Cl<sub>2</sub>).

| 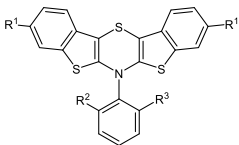      | transition state<br>(ts)                                                            | $\Delta G_{A,I-II}^\ddagger$ / kcal<br>mol <sup>-1</sup><br>(k / s <sup>-1</sup> ) | $\Delta G_{A,II-I}^\ddagger$ / kcal<br>mol <sup>-1</sup><br>(k / s <sup>-1</sup> ) | conformer I<br>( $\Delta E_{I-ts}$ / kcal<br>mol <sup>-1</sup> )                                 | conformer II<br>( $\Delta E_{II-ts}$ / kcal<br>mol <sup>-1</sup> )                               |
|----------------------------------------------------------------------------------------|-------------------------------------------------------------------------------------|------------------------------------------------------------------------------------|------------------------------------------------------------------------------------|--------------------------------------------------------------------------------------------------|--------------------------------------------------------------------------------------------------|
| R <sup>1</sup> = R <sup>2</sup> = H, R <sup>3</sup> = CN<br>( <b>3a</b> )              |   | 1.62<br>(3.96 · 10 <sup>11</sup> )                                                 | 1.96<br>(2.27 · 10 <sup>11</sup> )                                                 | <br>(0.478)  | <br>(0.996)  |
| R <sup>1</sup> = R <sup>2</sup> = H, R <sup>3</sup> = Cl<br>( <b>3b</b> )              |  | 1.60<br>(4.18 · 10 <sup>11</sup> )                                                 | 2.15<br>(1.64 · 10 <sup>11</sup> )                                                 | <br>(0.008) | <br>(0.868) |
| R <sup>1</sup> = R <sup>2</sup> = H, R <sup>3</sup> = F<br>( <b>3c</b> )               |  | 1.31<br>(6.78 · 10 <sup>11</sup> )                                                 | 2.21<br>(1.49 · 10 <sup>11</sup> )                                                 | <br>(0.343) | <br>(0.785) |
| R <sup>1</sup> = R <sup>2</sup> = H, R <sup>3</sup> = Me<br>( <b>3d</b> ) <sup>1</sup> |  | 0.87 (1.43 ·<br>10 <sup>12</sup> )                                                 | 1.63 (3.97 ·<br>10 <sup>11</sup> )                                                 | <br>(0.054) | <br>(1.26)  |
| R <sup>1</sup> = R <sup>2</sup> = H, R <sup>3</sup> =<br>OMe ( <b>3e</b> )             |  | 1.90<br>(2.52 · 10 <sup>11</sup> )                                                 | 2.16<br>(1.61 · 10 <sup>11</sup> )                                                 | <br>(0.051) | <br>(0.557) |
| R <sup>1</sup> = R <sup>2</sup> = H, R <sup>3</sup> = CN<br>( <b>3f</b> )              |  | 0.45<br>(2.89 · 10 <sup>12</sup> )                                                 | -                                                                                  | <br>(0.707) | -                                                                                                |
| R <sup>1</sup> = R <sup>2</sup> = H, R <sup>3</sup> = Cl<br>( <b>3g</b> )              |  | 1.21<br>(7.99 · 10 <sup>11</sup> )                                                 | -                                                                                  | <br>(0.174) | -                                                                                                |
| R <sup>1</sup> = R <sup>2</sup> = H, R <sup>3</sup> = F<br>( <b>3h</b> )               |  | 1.70<br>(3.54 · 10 <sup>11</sup> )                                                 | -                                                                                  | <br>(0.590) | -                                                                                                |

|                                                                  |                                                                                   |                                    |   |                                                                                     |   |
|------------------------------------------------------------------|-----------------------------------------------------------------------------------|------------------------------------|---|-------------------------------------------------------------------------------------|---|
| R <sup>1</sup> = R <sup>2</sup> = H, R <sup>3</sup> = Me<br>(3i) | 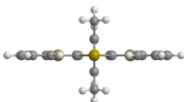 | 1.44<br>(5.46 · 10 <sup>11</sup> ) | - |  | - |
|                                                                  |                                                                                   |                                    |   | (0.033)                                                                             |   |
| R <sup>1</sup> = R <sup>2</sup> = H, R <sup>3</sup> = OMe (3j)   |  | 1.62<br>(4.05 · 10 <sup>11</sup> ) | - |  | - |
|                                                                  |                                                                                   |                                    |   | (0.098)                                                                             |   |
| R <sup>1</sup> = Br, R <sup>2</sup> = R <sup>3</sup> = OMe (4d)  |  | 1.86<br>(2.68 · 10 <sup>11</sup> ) | - |  | - |
|                                                                  |                                                                                   |                                    |   | (0.151)                                                                             |   |

<sup>1</sup>(B3LYP/6-311G\*\*).

Table 18. DFT-computational minimum structures of *intra*-conformers of BBTT **3** and **4** with their respective by gibbs free energy differences  $\Delta G_{I-II}$  calculated percentage contributions and HOMO-Energies  $E_{HOMO}$  (B3LYP/6-311++G\*\*, IEFPCM CH<sub>2</sub>Cl<sub>2</sub>).

| 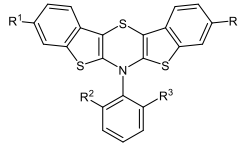 | thermodynamically favored minimum                                                   | $\Delta G_{I-II}$ | $K_{I-II}$ | Conformer I                               | Conformer II                              | $E_{HOMO} /$<br>eV |
|-----------------------------------------------------------------------------------|-------------------------------------------------------------------------------------|-------------------|------------|-------------------------------------------|-------------------------------------------|--------------------|
|                                                                                   |                                                                                     |                   |            | $E_{HOMO} /$<br>eV<br>(percentage /<br>%) | $E_{HOMO} /$<br>eV<br>(percentage /<br>%) |                    |
| R <sup>1</sup> = R <sup>2</sup> = H, R <sup>3</sup> = CN<br>(3a)                  |  | 0.3307            | 0.5719     | -5.43 (36.4)                              | -5.20 (63.6)                              | -5.28              |
|                                                                                   | conformer II                                                                        |                   |            |                                           |                                           |                    |
| R <sup>1</sup> = R <sup>2</sup> = H, R <sup>3</sup> = Cl<br>(3b)                  |  | 0.5560            | 0.3908     | -4.96 (28.1)                              | -5.12 (71.9)                              | -5.08              |
|                                                                                   | conformer II                                                                        |                   |            |                                           |                                           |                    |
| R <sup>1</sup> = R <sup>2</sup> = H, R <sup>3</sup> = F<br>(3c)                   |  | 0.8986            | 0.2190     | -5.09 (18.0)                              | -5.15 (82.0)                              | -5.14              |
|                                                                                   | conformer II                                                                        |                   |            |                                           |                                           |                    |
| R <sup>1</sup> = R <sup>2</sup> = R <sup>3</sup> = H (5)                          |  |                   |            | -5.08 (100)                               |                                           | -5.08              |
|                                                                                   |                                                                                     |                   |            |                                           |                                           |                    |
| R <sup>1</sup> = R <sup>2</sup> = H, R <sup>3</sup> = Me<br>(3d)                  |  | 0.0916            | 0.8566     | -4.97 (46.1)                              | -5.06 (53.9)                              | -5.02              |
|                                                                                   | conformer II                                                                        |                   |            |                                           |                                           |                    |
| R <sup>1</sup> = R <sup>2</sup> = H, R <sup>3</sup> = OMe<br>(3e)                 |  | 0.2667            | 0.6372     | -4.94 (38.9)                              | -5.02 (61.1)                              | -4.98              |
|                                                                                   | conformer II                                                                        |                   |            |                                           |                                           |                    |
| R <sup>1</sup> = R <sup>2</sup> = H, R <sup>3</sup> = CN<br>(3f)                  |  |                   |            | -5.34 (100)                               |                                           | -5.34              |
|                                                                                   |                                                                                     |                   |            |                                           |                                           |                    |

|                                                                              |                                                                                     |             |        |              |                    |       |
|------------------------------------------------------------------------------|-------------------------------------------------------------------------------------|-------------|--------|--------------|--------------------|-------|
| R <sup>1</sup> = R <sup>2</sup> = H, R <sup>3</sup> = Cl<br><b>(3g)</b>      | 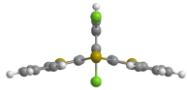   |             |        | -5.17 (100)  |                    | -5.17 |
| R <sup>1</sup> = R <sup>2</sup> = H, R <sup>3</sup> = F<br><b>(3h)</b>       |    |             |        | -5.25 (100)  |                    | -5.25 |
| R <sup>1</sup> = R <sup>2</sup> = H, R <sup>3</sup> = Me<br><b>(3i)</b>      |    |             |        | -4.88 (100)  |                    | -4.88 |
| R <sup>1</sup> = R <sup>2</sup> = H, R <sup>3</sup> =<br>OMe <b>(3j)</b>     |    |             |        | -4.86 (100)  |                    | -4.86 |
| R <sup>1</sup> = H, R <sup>2</sup> = CN, R <sup>3</sup> =<br>Cl <b>(3k)</b>  |    | 0.1682      | 0.7526 | -5.25 (42.9) | -5.30 (57.1)       | -5.27 |
|                                                                              | conformer II                                                                        |             |        |              |                    |       |
| R <sup>1</sup> = H, R <sup>2</sup> = CN, R <sup>3</sup> =<br>F <b>(3l)</b>   |    | -0.236<br>6 | 1.4915 | -5.24 (59.9) | -5.42 (40.1)       | -5.31 |
|                                                                              | conformer I                                                                         |             |        |              |                    |       |
| R <sup>1</sup> = H, R <sup>2</sup> = CN, R <sup>3</sup> =<br>Me <b>(3m)</b>  |    | -0.129<br>9 | 1.245  | -5.09 (55.5) | -5.19 (44.5)       | -5.13 |
|                                                                              | conformer I                                                                         |             |        |              |                    |       |
| R <sup>1</sup> = H, R <sup>2</sup> = CN, R <sup>3</sup> =<br>OMe <b>(3n)</b> |  | 0.1920      | 0.7229 | -5.06 (42.0) | -5.17 (58.0)       | -5.12 |
|                                                                              | conformer II                                                                        |             |        |              |                    |       |
| R <sup>1</sup> = H, R <sup>2</sup> = Cl, R <sup>3</sup> =<br>F <b>(3o)</b>   |  | 0.7913      | 0.2626 | -5.31 (20.8) | -5.17 (79.2)       | -5.20 |
|                                                                              | conformer II                                                                        |             |        |              |                    |       |
| R <sup>1</sup> = H, R <sup>2</sup> = Cl, R <sup>3</sup> =<br>Me <b>(3p)</b>  |  | -0.238<br>5 | 1.496  | -4.98 (59.9) | -5.01 (40.1)       | -4.99 |
|                                                                              | conformer I                                                                         |             |        |              |                    |       |
| R <sup>1</sup> = H, R <sup>2</sup> = Cl, R <sup>3</sup> =<br>OMe <b>(3q)</b> |  | 0.1142      | 0.8244 | -4.97 (45.2) | -4.95 (54.8)       | -4.96 |
|                                                                              | conformer II                                                                        |             |        |              |                    |       |
| R <sup>1</sup> = H, R <sup>2</sup> = F, R <sup>3</sup> =<br>Me <b>(3r)</b>   |  |             |        | -5.09 (100)  | - (-) <sup>1</sup> | -5.09 |
|                                                                              | conformer I                                                                         |             |        |              |                    |       |
| R <sup>1</sup> = H, R <sup>2</sup> = F, R <sup>3</sup> =<br>OMe <b>(3s)</b>  |  | -0.241<br>6 | 1.504  | -5.06 (60.1) | -5.02 (39.9)       | -5.04 |
|                                                                              | conformer I                                                                         |             |        |              |                    |       |



|                                                                     |                                                                                   |             |        |              |                   |       |
|---------------------------------------------------------------------|-----------------------------------------------------------------------------------|-------------|--------|--------------|-------------------|-------|
| R <sup>1</sup> = H, R <sup>2</sup> = Me, R <sup>3</sup> = OMe (3t)  | 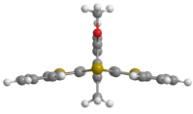 | -0.532<br>1 | 2.458  | -4.92 (71.1) | -4.93 (28.9)      | -4.92 |
| conformer I                                                         |                                                                                   |             |        |              |                   |       |
| R <sup>1</sup> = Br, R <sup>2</sup> = H, R <sup>3</sup> = Me (4a)   |  |             |        | -5.171 (100) | -(-) <sup>1</sup> |       |
| conformer II                                                        |                                                                                   |             |        |              |                   |       |
| R <sup>1</sup> = Br, R <sup>2</sup> = Cl, R <sup>3</sup> = OMe (4b) |  | 0.4455      | 0.4710 | -5.10 (32.0) | -5.07 (68.0)      | -5.08 |
| conformer I                                                         |                                                                                   |             |        |              |                   |       |
| R <sup>1</sup> = Br, R <sup>2</sup> = F, R <sup>3</sup> = OMe (4c)  |  | -0.729<br>8 | 3.432  | -5.12 (77.4) | -5.16 (22.6)      | -5.13 |
| conformer I                                                         |                                                                                   |             |        |              |                   |       |
| R <sup>1</sup> = Br, R <sup>2</sup> = R <sup>3</sup> = OMe (4d)     |  |             |        | -4.99 (100)  |                   | -4.99 |

<sup>1</sup>No second *N-intra*-conformation corresponding to a minimum on the potential hypersurface was found for this derivative.

## 4.4 Calculation of redox potentials of 3

### 4.4.1 Computation of redox potentials of 3 by means of DFT-quantum mechanical calculation<sup>12</sup>

$$E_{0(calc.)}^{0/+1} = IP + \frac{1}{F}(-T\Delta S_{redox}(gas) + \Delta G_{solv}(ox) + \Delta G_{solv}(red)).$$

$E_{0(calc.)}^{0/+1}$  as the DFT-calculated first redox potential of respective BBTT with ionization potential (IP) as the difference of enthalpies of the radical cation and native compound in gas phase ( $\Delta H_{redox}(gas)$ ),  $\Delta S_{redox}(gas)$  as difference of entropy of the radical cation and native compound in gas phase,  $\Delta G_{solv}(ox)$  as difference of SCF energy of the gas phase and under SMD variation of PCM as solvent model of the oxidized species as the radical cation and  $\Delta G_{solv}(red)$  as difference of SCF energy of the gas phase and under SMD variation of PCM as solvent model of the reduced species as the native BBTT.

When there are two possible *N-intra*-conformers in solution (see Table 18), the final plotted redox potential  $E_{0(calc.)}^{0/+1}$  is calculated from both redox potentials  $E_{0(calc.)}^{0/+1}$  by weighing them according to the calculated percentual amount of the corresponding *N-intra*-conformers in solution.

Table 19. DFT-computed first redox potential  $E_0^{0/+1}$  vs. vacuum of native BBTT to the respective radical cation ((u)B3LYP/6-311++G\*\*, (SMD CH<sub>2</sub>Cl<sub>2</sub>))

| 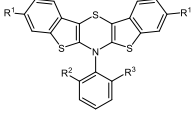 | ionization potential (IP) / eV | $\Delta S_{redox}(gas)$ / kcal mol <sup>-1</sup> | $\Delta G_{solv}(ox)$ / kcal mol <sup>-1</sup> | $\Delta G_{solv}(red)$ / kcal mol <sup>-1</sup> | $E_0^{0/+1}$ (calc.) vs. vacuum | $E_0^{0/+1}$ (calc.) vs. vacuum (weighted) |
|-----------------------------------------------------------------------------------|--------------------------------|--------------------------------------------------|------------------------------------------------|-------------------------------------------------|---------------------------------|--------------------------------------------|
| R <sup>1</sup> = R <sup>2</sup> = H, R <sup>3</sup> = CN ( <b>3a</b> )            | 6.09832                        | -0.003424                                        | -52.1522                                       | -22.5457                                        | 4.8587                          | 4.81655                                    |
|                                                                                   | 6.10833                        | -9.83E-4                                         | -52.1522                                       | -21.5148                                        | 4.79244                         |                                            |
| R <sup>1</sup> = R <sup>2</sup> = H, R <sup>3</sup> = Cl ( <b>3b</b> )            | 6.01279                        | -0.001951                                        | -49.1141                                       | -20.211                                         | 4.78463                         | 4.76999                                    |
|                                                                                   | 5.99059                        | -9.79E-4                                         | -49.1141                                       | -19.811                                         | 4.73252                         |                                            |
| R <sup>1</sup> = R <sup>2</sup> = H, R <sup>3</sup> = F ( <b>3c</b> )             | 6.02569                        | -0.003653                                        | -48.8098                                       | -19.5985                                        | 4.80617                         | 4.79798                                    |
|                                                                                   | 6.01151                        | -0.001998                                        | -48.8098                                       | -19.3672                                        | 4.76057                         |                                            |
| R <sup>1</sup> = R <sup>2</sup> = R <sup>3</sup> = H ( <b>5</b> )                 | 5.96678                        | -0.002113                                        | -49.205                                        | -19.5694                                        | 4.70894                         | 4.70894                                    |
| R <sup>1</sup> = R <sup>2</sup> = H, R <sup>3</sup> = Me ( <b>3d</b> )            | 5.96419                        | -9.25E-4                                         | -48.9374                                       | -19.7315                                        | 4.70963                         | 4.67192                                    |
|                                                                                   | 5.9378                         | 0.003146                                         | -48.9374                                       | -19.669                                         | 4.6279                          |                                            |
| R <sup>1</sup> = R <sup>2</sup> = H, R <sup>3</sup> = OMe ( <b>3e</b> )           | 5.84808                        | -6.54E-4                                         | -48.0724                                       | -20.5543                                        | 4.66321                         | 4.65541                                    |
|                                                                                   | 5.82474                        | -9.44E-4                                         | -48.0724                                       | -20.544                                         | 4.64317                         |                                            |
| R <sup>1</sup> = R <sup>2</sup> = H, R <sup>3</sup> = CN ( <b>3f</b> )            | 6.2171                         | 1.34E-4                                          | -54.3789                                       | -24.0196                                        | 4.89883                         | 4.89883                                    |
| R <sup>1</sup> = R <sup>2</sup> = H, R <sup>3</sup> = Cl ( <b>3g</b> )            | 6.02591                        | -4.08E-4                                         | -48.776                                        | -20.2586                                        | 4.79452                         | 4.79452                                    |
| R <sup>1</sup> = R <sup>2</sup> = H, R <sup>3</sup> = F ( <b>3h</b> )             | 6.0781                         | -9.31E-4                                         | -48.1845                                       | -19.1737                                        | 4.83208                         | 4.83208                                    |
| R <sup>1</sup> = R <sup>2</sup> = H, R <sup>3</sup> = Me ( <b>3i</b> )            | 5.91475                        | -0.001905                                        | -48.6781                                       | -19.6356                                        | 4.67995                         | 4.67995                                    |
| R <sup>1</sup> = R <sup>2</sup> = H, R <sup>3</sup> = OMe ( <b>3j</b> )           | 5.6951                         | -0.002617                                        | -46.9857                                       | -21.6973                                        | 4.6323                          | 4.6323                                     |
| R <sup>1</sup> = H, R <sup>2</sup> = CN, R <sup>3</sup> = Cl ( <b>3k</b> )        | 6.1332                         | 4.33E-4                                          | -51.4918                                       | -21.8189                                        | 4.84084                         | 4.84334                                    |
|                                                                                   | 6.10112                        | -5.4E-4                                          | -51.4918                                       | -22.4027                                        | 4.84665                         |                                            |
| R <sup>1</sup> = H, R <sup>2</sup> = CN, R <sup>3</sup> = F ( <b>3l</b> )         | 6.16572                        | -1E-6                                            | -51.3851                                       | -21.3421                                        | 4.86291                         | 4.89294                                    |
|                                                                                   | 6.13914                        | -0.003382                                        | -51.3851                                       | -22.104                                         | 4.91308                         |                                            |
| R <sup>1</sup> = H, R <sup>2</sup> = CN, R <sup>3</sup> = Me ( <b>3m</b> )        | 6.04878                        | 0.001274                                         | -51.8079                                       | -21.8155                                        | 4.76168                         | 4.78475                                    |
|                                                                                   | 6.00709                        | -0.002553                                        | -51.8079                                       | -22.5952                                        | 4.80329                         |                                            |

|                                                                                |                                                                                                                |           |          |          |         |         |
|--------------------------------------------------------------------------------|----------------------------------------------------------------------------------------------------------------|-----------|----------|----------|---------|---------|
| R <sup>1</sup> = H, R <sup>2</sup> = CN,<br>R <sup>3</sup> = OMe ( <b>3n</b> ) | 5.94677                                                                                                        | -1.84E-4  | -51.045  | -22.7968 | 4.75416 | 4.75416 |
|                                                                                | 5.92029                                                                                                        | -9.3E-4   | -51.045  | -23.4099 | 4.76391 |         |
| R <sup>1</sup> = H, R <sup>2</sup> = Cl,<br>R <sup>3</sup> = F ( <b>3o</b> )   | 6.02263                                                                                                        | -0.002186 | -48.3928 | -19.8285 | 4.8422  | 4.83439 |
|                                                                                | 6.01776                                                                                                        | -8E-5     | -48.3928 | -19.7031 | 4.80466 |         |
| R <sup>1</sup> = H, R <sup>2</sup> = Cl,<br>R <sup>3</sup> = Me ( <b>3p</b> )  | 5.95992                                                                                                        | -0.003263 | -48.7891 | -20.231  | 4.76368 | 4.74305 |
|                                                                                | 5.97712                                                                                                        | 2.5E-5    | -48.7891 | -20.0209 | 4.72926 |         |
| R <sup>1</sup> = H, R <sup>2</sup> = Cl,<br>R <sup>3</sup> = OMe ( <b>3q</b> ) | 5.86599                                                                                                        | -0.001401 | -48.1067 | -21.0991 | 4.71292 | 4.71655 |
|                                                                                | 5.85995                                                                                                        | -0.001747 | -48.1067 | -21.3207 | 4.72096 |         |
| R <sup>1</sup> = H, R <sup>2</sup> = F,<br>R <sup>3</sup> = Me ( <b>3r</b> )   | For this <i>N</i> -intra-conformer <b>3r</b> no corresponding minimum on the potential hypersurface was found. |           |          |          |         | 4.78903 |
|                                                                                | 6.00286                                                                                                        | -0.002682 | -48.4819 | -19.6913 | 4.78903 |         |
| R <sup>1</sup> = H, R <sup>2</sup> = F,<br>R <sup>3</sup> = OMe ( <b>3s</b> )  | 5.87388                                                                                                        | -0.001816 | -47.6551 | -20.6407 | 4.72588 | 4.72849 |
|                                                                                | 5.89037                                                                                                        | -0.001296 | -47.6551 | -20.5158 | 4.73023 |         |
| R <sup>1</sup> = H, R <sup>2</sup> = Me,<br>R <sup>3</sup> = OMe ( <b>3t</b> ) | 5.81763                                                                                                        | -0.001058 | -47.661  | -20.6355 | 4.65935 | 4.66744 |
|                                                                                | 5.79755                                                                                                        | -0.003384 | -47.661  | -20.6676 | 4.67073 |         |

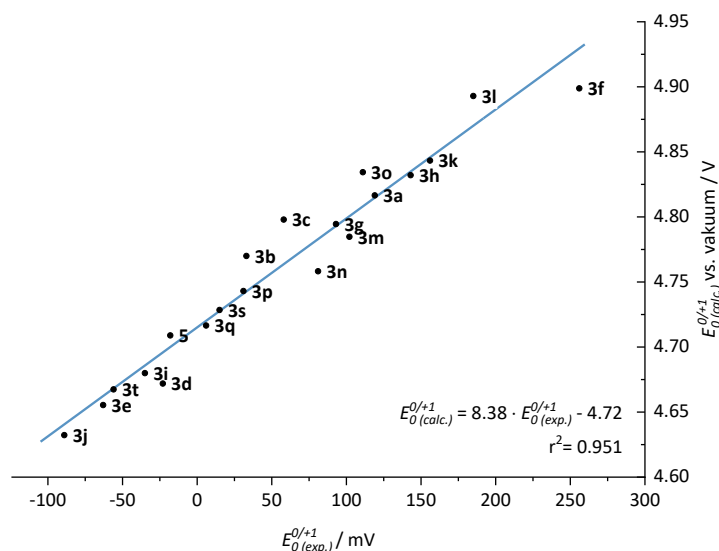

**Figure 73.** Linear correlation between the experimental redox potentials  $E_0^{0/+1}$  and the calculated redox potentials  $E_{0\text{ (calc.)}}^{0/+1}$  of **3** ( $E_{0\text{ (calc.)}}^{0/+1} = \text{IP} + \frac{1}{F}(-T\Delta S_{\text{redox}}(\text{Gas}) + \Delta G_{\text{solv}}(\text{ox}) + \Delta G_{\text{solv}}(\text{red}))$ ).

#### 4.4.2 Computation of redox potentials of 3f-t by means of experimental data

$$E_{0,3(R1,R2)(calc.)} = E_{0,5(H,H)(exp.)} + \Delta E_{0,3(R1,H)(exp.)-5(H,H)(exp.)} + \Delta E_{0,3(R2,H)(exp.)-5(H,H)(exp.)}$$

$E_{0,3(R1,R2)(calc.)}$  as the calculated redox potential of *anti-anti-N-ortho,ortho'*-disubstituted-phenyl-BBTT **3f-t** with the two substituents R1 and R2 as the *ortho*- and *ortho'*-substituents with  $E_{0,5(H,H)(exp.)}$  as the absolute experimental redox potential of the unsubstituted *anti-anti-N*-phenyl-BBTT **5**<sup>4,6</sup>,  $\Delta E_{0,3(R1,H)(exp.)-5(H,H)(exp.)}$  as the difference of the absolute experimental redox potentials of *anti-anti-N-ortho*-substituted-phenyl-BBTT **3a-e** with the *ortho*-substituent R1 and *anti-anti-N*-phenyl-BBTT **5** and  $\Delta E_{0,3(R2,H)(exp.)-5(H,H)(exp.)}$  as the difference of the absolute redox potentials of *anti-anti-N-ortho*-substituted-phenyl-BBTT **3a-e** with the *ortho*-substituent R2 and *anti-anti-N*-phenyl-BBTT **5**.

Table 20. Calculated redox potential  $E_{0,3(R1,R2)(calc.)}^{0/+1}$  and  $E_{0,3(R1,R2)(calc.)}^{+1/+2}$  of BBTT **3f-t**.

|                                                                                    | $E_{0,3}^{0/+1}(exp.)$ | $E_{0,3}^{+1/+2}(exp.)$ | $\Delta E_{0,3-5}^{0/+1}(exp.)$ | $\Delta E_{0,3-5}^{+1/+2}(exp.)$ | $E_{0,3(R1,R2)(calc.)}^{0/+1}$ | $E_{0,3(R1,R2)(calc.)}^{+1/+2}$ |
|------------------------------------------------------------------------------------|------------------------|-------------------------|---------------------------------|----------------------------------|--------------------------------|---------------------------------|
| 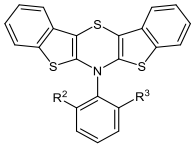 |                        |                         |                                 |                                  |                                |                                 |
| R <sup>1</sup> = R <sup>2</sup> = H, R <sup>3</sup> = CN<br><b>(3a)</b>            | 119                    | 906                     | 137                             | 164                              | -                              | -                               |
| R <sup>1</sup> = R <sup>2</sup> = H, R <sup>3</sup> = Cl<br><b>(3b)</b>            | 33                     | 840                     | 57                              | 98                               | -                              | -                               |
| R <sup>1</sup> = R <sup>2</sup> = H, R <sup>3</sup> = F<br><b>(3c)</b>             | 58                     | 865                     | 76                              | 123                              | -                              | -                               |
| R <sup>1</sup> = R <sup>2</sup> = R <sup>3</sup> = H ( <b>5</b> ) <sup>4,6</sup>   | -18                    | 742                     | 0                               | 0                                | -                              | -                               |
| R <sup>1</sup> = R <sup>2</sup> = H, R <sup>3</sup> = Me<br><b>(3d)</b>            | -23                    | 771                     | -5                              | 29                               | -                              | -                               |
| R <sup>1</sup> = R <sup>2</sup> = H, R <sup>3</sup> = OMe<br><b>(3e)</b>           | -63                    | 761                     | -45                             | 19                               | -                              | -                               |
| R <sup>1</sup> = R <sup>2</sup> = H, R <sup>3</sup> = CN<br><b>(3f)</b>            | 256                    | 1073                    | -                               | -                                | 256                            | 1073                            |
| R <sup>1</sup> = R <sup>2</sup> = H, R <sup>3</sup> = Cl<br><b>(3g)</b>            | 93                     | 951                     | -                               | -                                | 93                             | 951                             |
| R <sup>1</sup> = R <sup>2</sup> = H, R <sup>3</sup> = F<br><b>(3h)</b>             | 143                    | 982                     | -                               | -                                | 143                            | 982                             |
| R <sup>1</sup> = R <sup>2</sup> = H, R <sup>3</sup> = Me<br><b>(3i)</b>            | -35                    | 835                     | -                               | -                                | -35                            | 835                             |
| R <sup>1</sup> = R <sup>2</sup> = H, R <sup>3</sup> = OMe<br><b>(3j)</b>           | -89                    | 787                     | -                               | -                                | -89                            | 787                             |
| R <sup>1</sup> = H, R <sup>2</sup> = CN, R <sup>3</sup> = Cl<br><b>(3k)</b>        | 156                    | 1019                    | -                               | -                                | 156                            | 1019                            |
| R <sup>1</sup> = H, R <sup>2</sup> = CN, R <sup>3</sup> = F<br><b>(3l)</b>         | 185                    | 1014                    | -                               | -                                | 185                            | 1014                            |
| R <sup>1</sup> = H, R <sup>2</sup> = CN, R <sup>3</sup> = Me<br><b>(3m)</b>        | 102                    | 956                     | -                               | -                                | 102                            | 956                             |

|                                                                             |     |     |   |   |     |     |
|-----------------------------------------------------------------------------|-----|-----|---|---|-----|-----|
| R <sup>1</sup> = H, R <sup>2</sup> = CN, R <sup>3</sup> = OMe ( <b>3n</b> ) | 81  | 948 | - | - | 74  | 925 |
| R <sup>1</sup> = H, R <sup>2</sup> = Cl, R <sup>3</sup> = F ( <b>3o</b> )   | 111 | 954 | - | - | 111 | 954 |
| R <sup>1</sup> = H, R <sup>2</sup> = Cl, R <sup>3</sup> = Me ( <b>3p</b> )  | 31  | 894 | - | - | 31  | 894 |
| R <sup>1</sup> = H, R <sup>2</sup> = Cl, R <sup>3</sup> = OMe ( <b>3q</b> ) | 6   | 874 | - | - | 6   | 874 |
| R <sup>1</sup> = H, R <sup>2</sup> = F, R <sup>3</sup> = Me ( <b>3r</b> )   | 56  | 893 | - | - | 56  | 893 |
| R <sup>1</sup> = H, R <sup>2</sup> = F, R <sup>3</sup> = OMe ( <b>3s</b> )  | 15  | 873 | - | - | 15  | 873 |
| R <sup>1</sup> = H, R <sup>2</sup> = Me, R <sup>3</sup> = OMe ( <b>3t</b> ) | -56 | 818 | - | - | -56 | 818 |

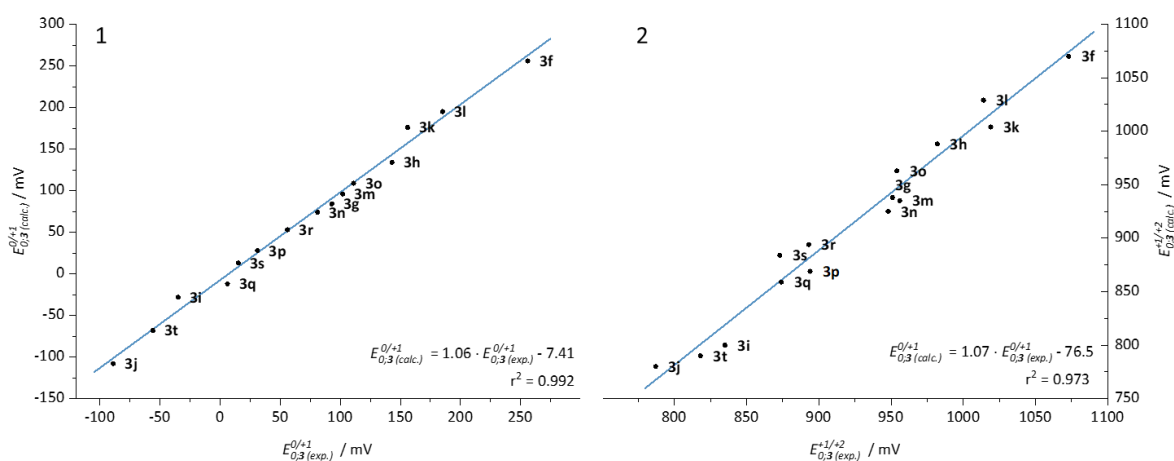

**Figure 74.** Linear correlation between the experimental redox potentials  $E_0^{0/+1}$  (1) and  $E_0^{+1/+2}$  (2) and the calculated redox potentials  $E_0^{0/+1}$  and  $E_0^{+1/+2}$  of **3f-t** via  $E_{0,3}(R1,R2)(calc.) = E_{0,5}(H,H)(exp.) + \Delta E_{0,3}(R1,H)(exp.) - 5(H,H)(exp.) + \Delta E_{0,3}(R2,H)(exp.) - 5(H,H)(exp.)$

## 4.5 Spectroelectrochemistry

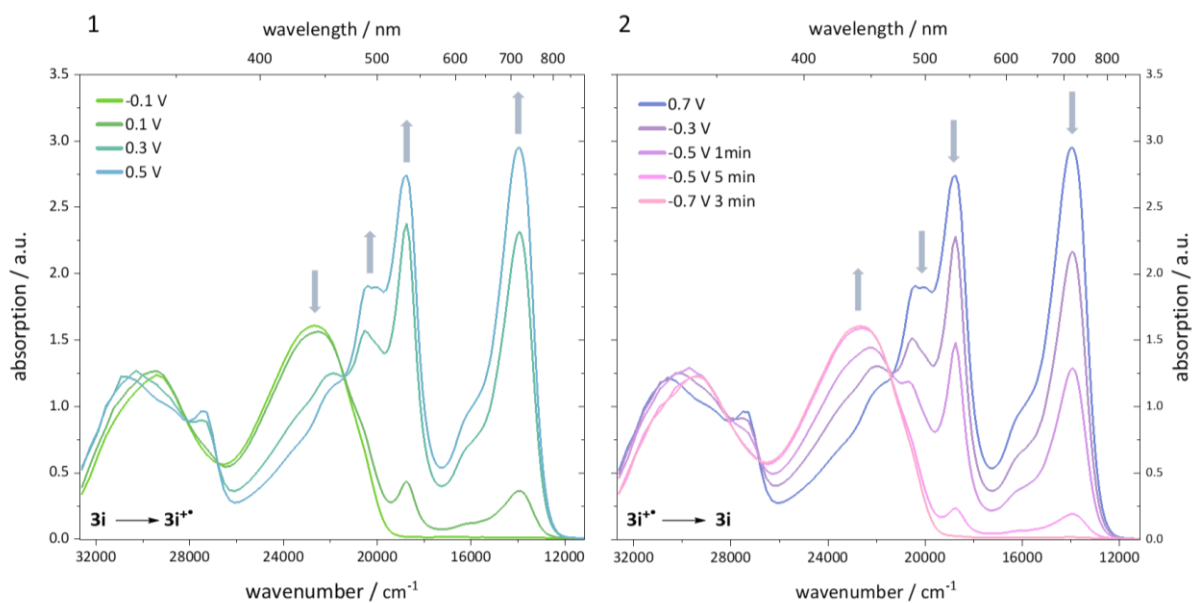

Figure 75. Spectroelectrochemical measurements of compounds **3i** forming the corresponding radical cation **3i<sup>•+</sup>** by oxidation by increase the applied potential (1) and re-reduction by decrease of the applied potential (2) (recorded in CH<sub>2</sub>Cl<sub>2</sub>, *c* = 5 · 10<sup>-3</sup> M, *T* = 298 K, electrolyte 0.1 M [nBu<sub>4</sub>N][PF<sub>6</sub>]; Pt-working electrode, GC-counter electrode and Ag/AgCl(3 M)-reference electrode).

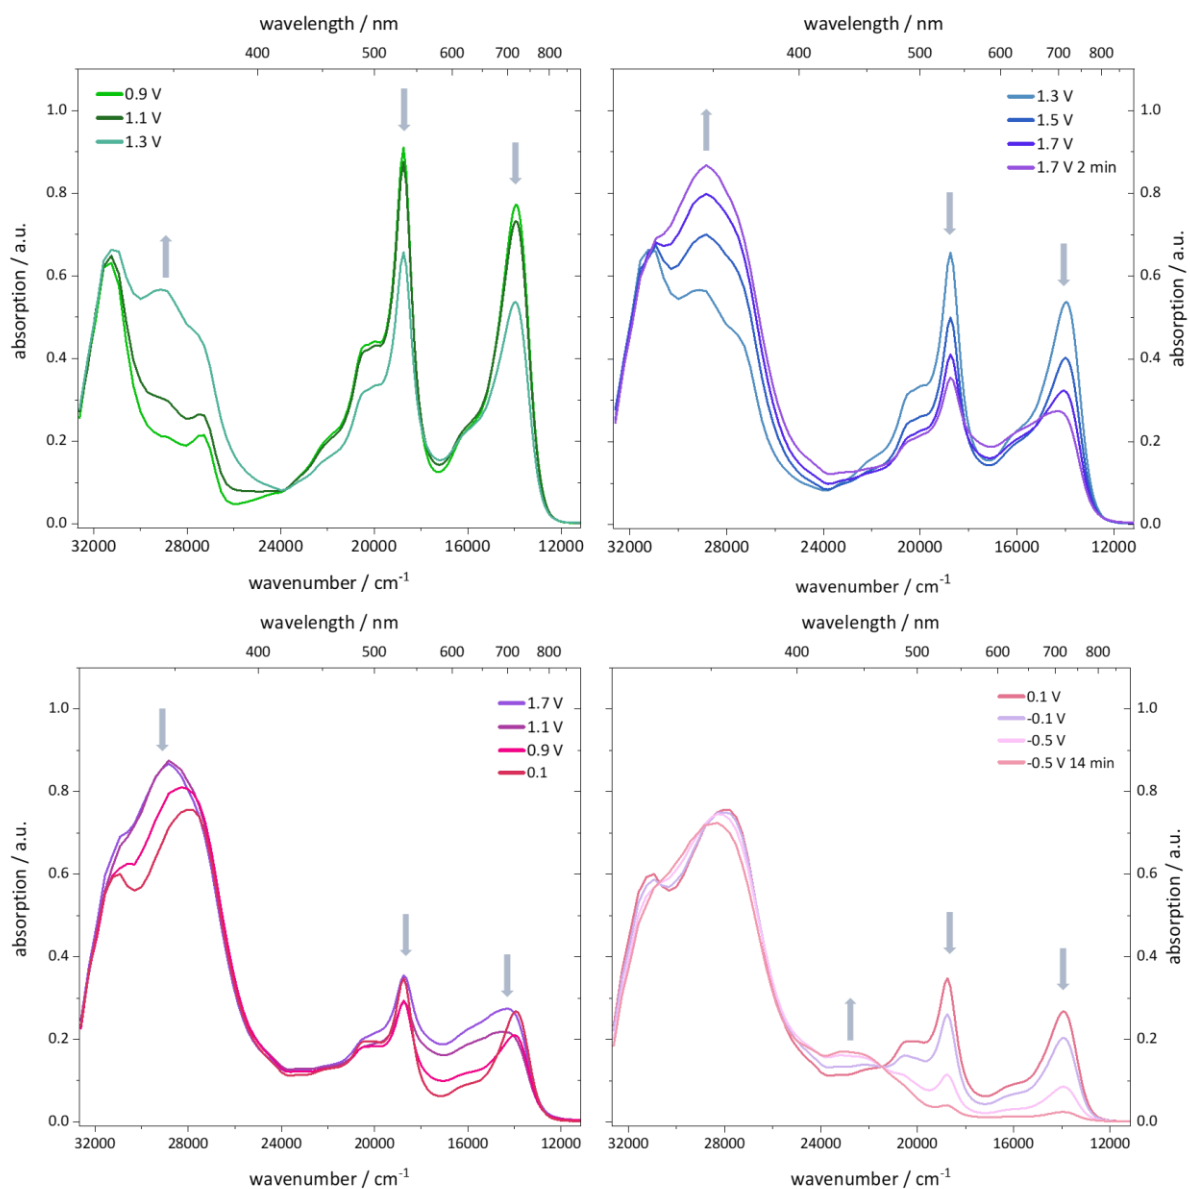

Figure 76. Spectroelectrochemical measurements of compound  $3i^{+\bullet}$  by further oxidation by increase the applied potential and re-reduction by decrease of the applied potential. Formation of the dication  $3i^{2+}$  cannot be seen due to presumably a fast follow-up reaction on the timescale of the experiment (recorded in  $CH_2Cl_2$ ,  $c = 5 \cdot 10^{-3}$  M,  $T = 298$  K, electrolyte 0.1 M  $[^nBu_4N][PF_6]$ ; Pt-working electrode, GC-counter electrode and Ag/AgCl(3 M)-reference electrode).

## 5 Photophysics

### 5.1 UV/vis absorption and emission spectra

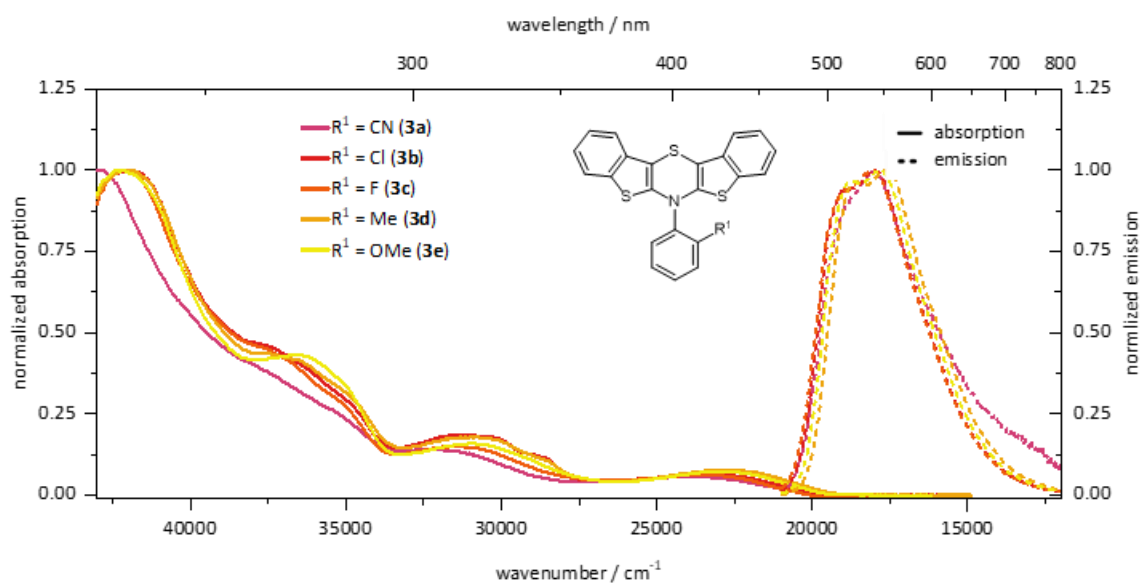

Figure 77. UV/vis-absorption and emission spectra of *anti-anti-N-ortho*-substituted-phenyl-BBTT **3a-e** in solution (recorded in  $\text{CH}_2\text{Cl}_2$ ,  $T = 298 \text{ K}$ ,  $c = 10^{-5}$  to  $10^{-7} \text{ M}$ ).

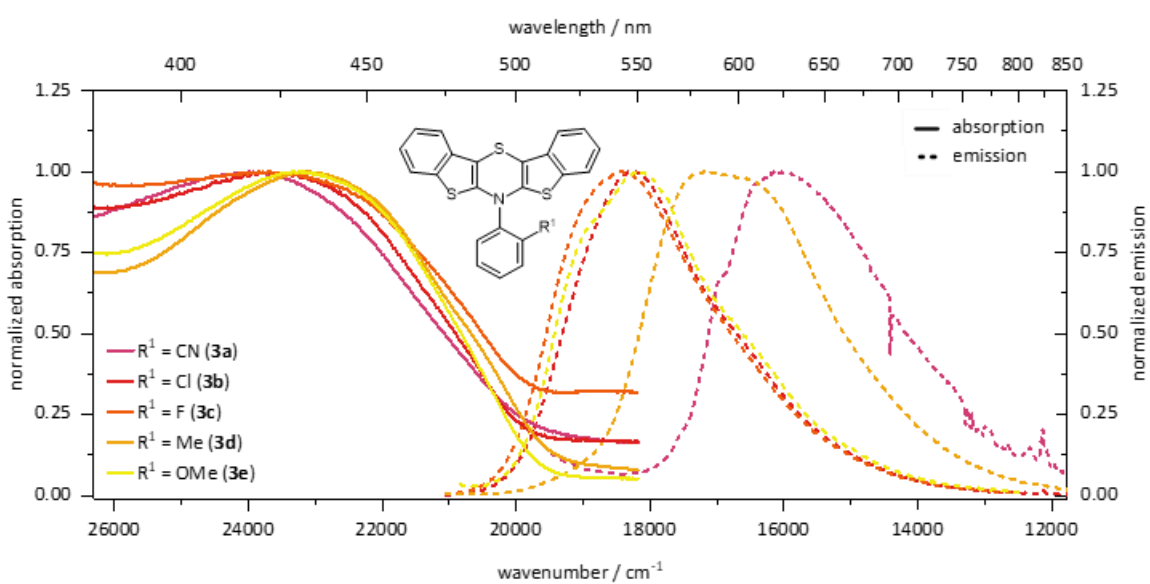

Figure 78. UV/vis-absorption and emission spectra of *anti-anti-N-ortho*-substituted-phenyl-BBTT **3a-e** in powder ( $T = 298 \text{ K}$ ).



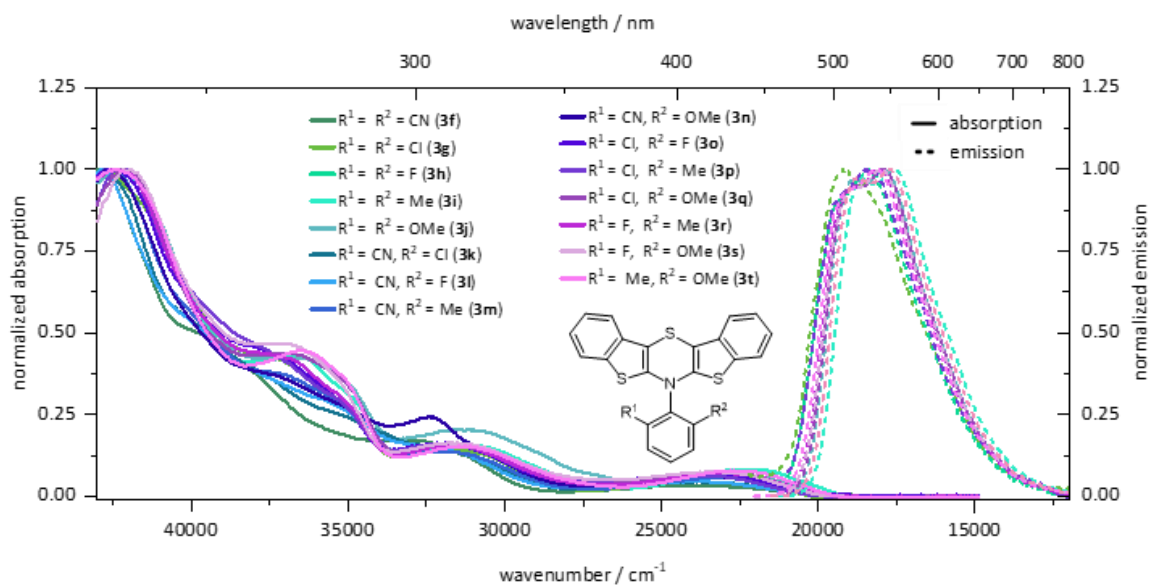

Figure 79. UV/vis-absorption and emission spectra of *anti-anti-N-ortho,ortho'*-disubstituted-phenyl-BBTT **3f-t** in solution (recorded in CH<sub>2</sub>Cl<sub>2</sub>,  $T = 298$  K,  $c = 10^{-5}$  to  $10^{-7}$  M).

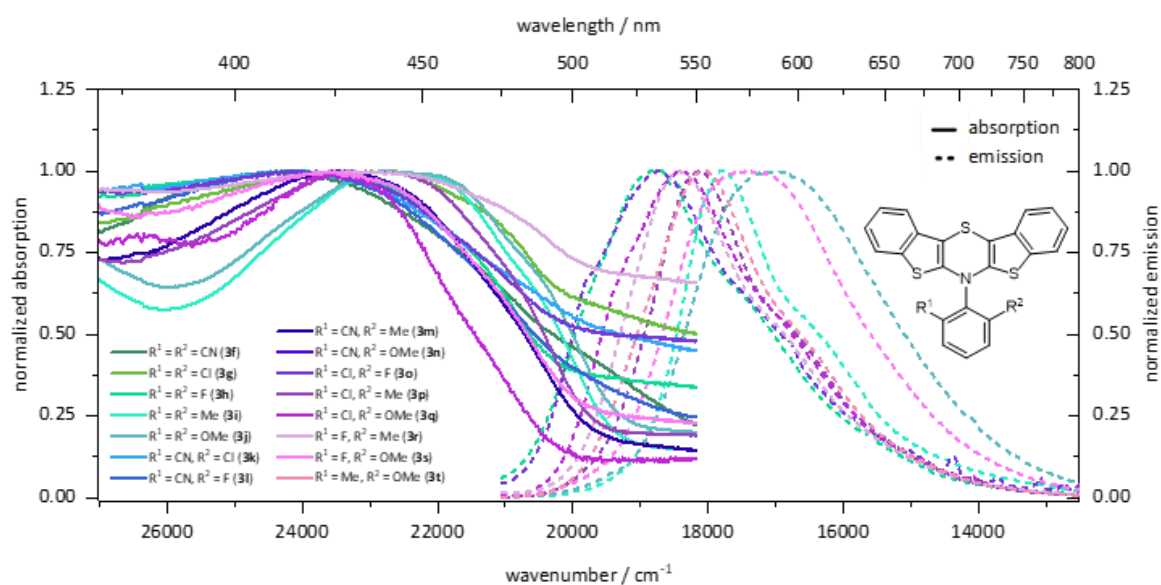

Figure 80. UV/vis-absorption and emission spectra of *anti-anti-N-ortho,ortho'*-disubstituted-phenyl-BBTT **3f-t** in powder ( $T = 298$  K).

## 5.2 TD-DFT-computed and experimental UV/vis absorption and emission data

Table 21. Assignment of the experimental absorption bands to the TD-DFT simulated underlying transitions of the thermodynamically favored *N-intra*-conformer of *anti-anti-N-ortho*-substituted-phenyl-BBTT **3a-e** (PBE1PBE/6-311++G\*\*, IEFPCM CH<sub>2</sub>Cl<sub>2</sub>).

| 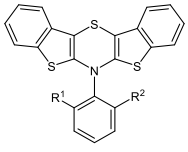 | $\lambda_{\text{exp,abs}} / \text{nm}$                 | $\lambda_{\text{sim,abs}} / \text{nm}$ | oscillator strength | most dominant contribution (%) | $\lambda_{\text{exp,em}} / \text{nm}$ | $\lambda_{\text{sim,em}} / \text{nm}$ |
|-----------------------------------------------------------------------------------|--------------------------------------------------------|----------------------------------------|---------------------|--------------------------------|---------------------------------------|---------------------------------------|
|                                                                                   | R <sup>1</sup> = H, R <sup>2</sup> = CN<br><b>(3a)</b> |                                        | 242                 | 0.061                          | HOMO-1 → LUMO+3 (55)                  | 519,<br>543                           |
| 233                                                                               |                                                        | 243                                    | 0.044               | HOMO-6 → LUMO (54)             |                                       |                                       |
|                                                                                   |                                                        | 244                                    | 0.047               | HOMO → LUMO+14 (44)            |                                       |                                       |
|                                                                                   |                                                        | 254                                    | 0.285               | HOMO → LUMO+10 (46)            |                                       |                                       |
| –                                                                                 |                                                        | 268                                    | 0.159               | HOMO-2 → LUMO+1 (73)           |                                       |                                       |
| 309                                                                               |                                                        | 314                                    | 0.042               | HOMO-1 → LUMO (63)             |                                       |                                       |
|                                                                                   |                                                        | 316                                    | 0.060               | HOMO → LUMO+3 (51)             |                                       |                                       |
| 411                                                                               | 403                                                    | 0.115                                  | HOMO → LUMO+1 (84)  |                                |                                       |                                       |
| R <sup>1</sup> = H, R <sup>2</sup> = Cl<br><b>(3b)</b>                            |                                                        | 228                                    | 0.0653              | HOMO → LUMO+17 (42)            | 519,<br>540                           | 558                                   |
|                                                                                   | 235                                                    | 233                                    | 0.2167              | HOMO-1 → LUMO+4 (33)           |                                       |                                       |
|                                                                                   |                                                        | 240                                    | 0.109               | HOMO-1 → LUMO+3 (51)           |                                       |                                       |
|                                                                                   |                                                        | 256                                    | 0.228               | HOMO → LUMO+10 (49)            |                                       |                                       |
|                                                                                   | 263                                                    | 269                                    | 0.152               | HOMO-2 → LUMO (80)             |                                       |                                       |
|                                                                                   |                                                        | 270                                    | 0.109               | HOMO-1 → LUMO (87)             |                                       |                                       |
|                                                                                   | 314                                                    | 320                                    | 0.091               | HOMO → LUMO+3 (73)             |                                       |                                       |
| 423                                                                               | 414                                                    | 0.127                                  | HOMO → LUMO (95)    |                                |                                       |                                       |
| R <sup>1</sup> = H, R <sup>2</sup> = F<br><b>(3c)</b>                             | 234                                                    | 232                                    | 0.203               | HOMO → LUMO+15 (36)            | 515<br>(S),<br>539                    | 556                                   |
|                                                                                   |                                                        | 235                                    | 0.184               | HOMO-1 → LUMO+4 (41)           |                                       |                                       |
|                                                                                   | 267                                                    | 255                                    | 0.259               | HOMO → LUMO+10 (57)            |                                       |                                       |
|                                                                                   |                                                        | 268                                    | 0.159               | HOMO-2 → LUMO (80)             |                                       |                                       |

|                                                           |     |     |       |                 |      |             |     |
|-----------------------------------------------------------|-----|-----|-------|-----------------|------|-------------|-----|
|                                                           |     | 269 | 0.115 | HOMO-1 → LUMO   | (86) |             |     |
|                                                           | 282 | 297 | 0.033 | HOMO → LUMO+6   | (73) |             |     |
|                                                           | 315 | 318 | 0.097 | HOMO → LUMO+3   | (75) |             |     |
|                                                           | 418 | 409 | 0.132 | HOMO → LUMO     | (95) |             |     |
|                                                           |     | 232 | 0.148 | HOMO → LUMO+16  | (33) |             |     |
|                                                           | 234 | 234 | 0.342 | HOMO-1 → LUMO+4 | (43) |             |     |
|                                                           |     | 249 | 0.130 | HOMO → LUMO+13  | (48) |             |     |
|                                                           |     | 258 | 0.225 | HOMO → LUMO+10  | (64) |             |     |
| R <sup>1</sup> = H, R <sup>2</sup> = Me<br>( <b>3d</b> )  | 269 | 269 | 0.137 | HOMO-2 → LUMO   | (79) | 525,<br>551 | 566 |
|                                                           |     | 269 | 0.124 | HOMO-1 → LUMO   | (85) |             |     |
|                                                           | 316 | 318 | 0.053 | HOMO → LUMO+4   | (71) |             |     |
|                                                           |     | 320 | 0.046 | HOMO → LUMO+3   | (72) |             |     |
|                                                           | 429 | 415 | 0.150 | HOMO → LUMO     | (96) |             |     |
|                                                           | 232 | 232 | 0.475 | HOMO-1 → LUMO+4 | (40) |             |     |
|                                                           | -   | 252 | 0.185 | HOMO → LUMO+14  | (48) |             |     |
|                                                           |     | 260 | 0.202 | HOMO → LUMO+10  | (64) |             |     |
| R <sup>1</sup> = H, R <sup>2</sup> =<br>OMe ( <b>3e</b> ) | 270 | 270 | 0.099 | HOMO-1 → LUMO   | (82) | 521,<br>547 | 560 |
|                                                           |     | 270 | 0.136 | HOMO-2 → LUMO   | (78) |             |     |
|                                                           | 318 | 323 | 0.059 | HOMO → LUMO+4   | (66) |             |     |
|                                                           |     | 323 | 0.046 | HOMO → LUMO+2   | (66) |             |     |
|                                                           | 425 | 423 | 0.143 | HOMO → LUMO     | (96) |             |     |

The corresponding HOMOs and LUMOs referenced to their energy are depicted in the following.

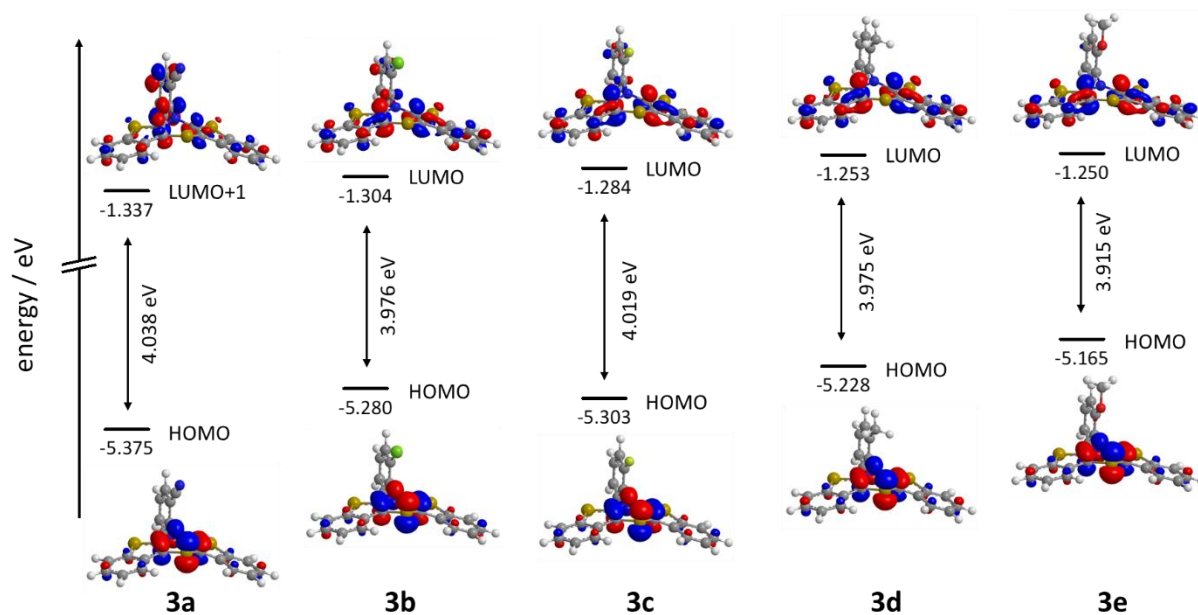

Figure 81. Selected Kohn-Sham frontier orbitals and energies using the example of **3a-e** (PBE1PBE/6-311++G\*\*, IEFPCM CH<sub>2</sub>Cl<sub>2</sub>, isosurface value at 0.05 a.u.).

Table 22. Assignment of the experimental absorption bands to the TD-DFT simulated underlying transitions of *anti-anti-N-ortho,ortho*-disubstituted-phenyl-BBTT **3f-j** with a homogenic substitution pattern (PBE1PBE/6-311++G\*\*, IEFPCM CH<sub>2</sub>Cl<sub>2</sub>).

| 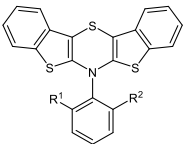 | $\lambda_{\text{exp,abs}} /$ | $\lambda_{\text{sim,abs}} /$ | oscillator strength            | most dominant contribution (%)   | $\lambda_{\text{exp,em}} /$ | $\lambda_{\text{sim,em}} /$ |
|-------------------------------------------------------------------------------------|------------------------------|------------------------------|--------------------------------|----------------------------------|-----------------------------|-----------------------------|
|                                                                                     | nm                           | nm                           |                                |                                  | nm                          | nm                          |
| $R^1 = R^2 = \text{CN}$ ( <b>3f</b> )                                               | 232                          | 231                          | 0.225                          | HOMO $\rightarrow$ LUMO+17 (45)  | -                           | -                           |
|                                                                                     | 251                          | 248                          | 0.354                          | HOMO $\rightarrow$ LUMO+13 (44)  |                             |                             |
|                                                                                     | 260                          | 265                          | 0.126                          | HOMO-1 $\rightarrow$ LUMO+2 (74) |                             |                             |
|                                                                                     | 300                          | 316                          | 0.135                          | HOMO $\rightarrow$ LUMO+3 (89)   |                             |                             |
|                                                                                     | 411                          | 380                          | 0.071                          | HOMO $\rightarrow$ LUMO+2 (96)   |                             |                             |
| $R^1 = R^2 = \text{Cl}$ ( <b>3g</b> )                                               | 230                          | 227                          | 0.1345                         | HOMO $\rightarrow$ LUMO+18 (25)  | 509,<br>536 (S)             | 551                         |
|                                                                                     |                              | 232                          | 0.2644                         | HOMO $\rightarrow$ LUMO+15 (30)  |                             |                             |
|                                                                                     | 264                          | 249                          | 0.092                          | HOMO-3 $\rightarrow$ LUMO (60)   |                             |                             |
|                                                                                     |                              | 255                          | 0.270                          | HOMO $\rightarrow$ LUMO+11 (37)  |                             |                             |
|                                                                                     |                              | 276                          | 0.155                          | HOMO-2 $\rightarrow$ LUMO (89)   |                             |                             |
| 310                                                                                 | 325                          | 0.092                        | HOMO $\rightarrow$ LUMO+3 (81) |                                  |                             |                             |

|                                                        |                                                    |       |             |                 |                 |                    |     |      |  |
|--------------------------------------------------------|----------------------------------------------------|-------|-------------|-----------------|-----------------|--------------------|-----|------|--|
|                                                        | 420                                                | 427   | 0.076       | HOMO → LUMO     | (96)            |                    |     |      |  |
| R <sup>1</sup> = R <sup>2</sup> = F ( <b>3h</b> )      | 234                                                | 233   | 0.314       | HOMO-1 → LUMO+4 | (41)            |                    |     |      |  |
|                                                        |                                                    | 247   | 0.073       | HOMO → LUMO+12  | (45)            |                    |     |      |  |
|                                                        | 265                                                | 255   | 0.288       | HOMO → LUMO+10  | (51)            | 511<br>(S),<br>525 | 547 |      |  |
|                                                        |                                                    | 268   | 0.145       | HOMO-2 → LUMO   | (78)            |                    |     |      |  |
|                                                        | 279                                                | 269   | 0.107       | HOMO-1 → LUMO   | (87)            |                    |     |      |  |
|                                                        | 309                                                | 306   | 0.093       | HOMO → LUMO+6   | (45)            |                    |     |      |  |
|                                                        | 409                                                | 410   | 0.122       | HOMO → LUMO     | (93)            |                    |     |      |  |
|                                                        | R <sup>1</sup> = R <sup>2</sup> = Me ( <b>3i</b> ) | 233   | 231         | 0.1459          | HOMO-1 → LUMO+6 |                    |     | (37) |  |
| 232                                                    |                                                    |       | 0.3294      | HOMO-1 → LUMO+3 | (58)            |                    |     |      |  |
| 235                                                    |                                                    |       | 0.0731      | HOMO-1 → LUMO+4 | (28)            |                    |     |      |  |
| 269                                                    |                                                    | 259   | 0.433       | HOMO → LUMO+13  | (62)            | 524,<br>553        | 567 |      |  |
|                                                        |                                                    | 266   | 0.105       | HOMO → LUMO+10  | (68)            |                    |     |      |  |
|                                                        |                                                    | 269   | 0.132       | HOMO-1 → LUMO   | (88)            |                    |     |      |  |
|                                                        |                                                    | 272   | 0.052       | HOMO-2 → LUMO   | (64)            |                    |     |      |  |
| 316                                                    |                                                    | 315   | 0.109       | HOMO → LUMO+4   | (76)            |                    |     |      |  |
| 434                                                    | 444                                                | 0.162 | HOMO → LUMO | (97)            |                 |                    |     |      |  |
| R <sup>1</sup> = R <sup>2</sup> = OMe<br>( <b>3j</b> ) | 270                                                | 236   | 233         | 0.375           | HOMO-1 → LUMO+2 |                    |     | (59) |  |
|                                                        |                                                    | 257   | 0.332       | HOMO → LUMO+15  | (59)            |                    |     |      |  |
|                                                        |                                                    | 265   | 0.140       | HOMO → LUMO+11  | (63)            |                    |     |      |  |
|                                                        |                                                    | 268   | 0.127       | HOMO-1 → LUMO   | (87)            | 518,<br>544        | 555 |      |  |
|                                                        |                                                    | 271   | 0.057       | HOMO-2 → LUMO   | (63)            |                    |     |      |  |
|                                                        | 315                                                | 314   | 0.103       | HOMO → LUMO+4   | (54)            |                    |     |      |  |
|                                                        | 429                                                | 432   | 0.162       | HOMO → LUMO     | (97)            |                    |     |      |  |

The corresponding HOMOs and LUMOs referenced to their energy are depicted in the following.

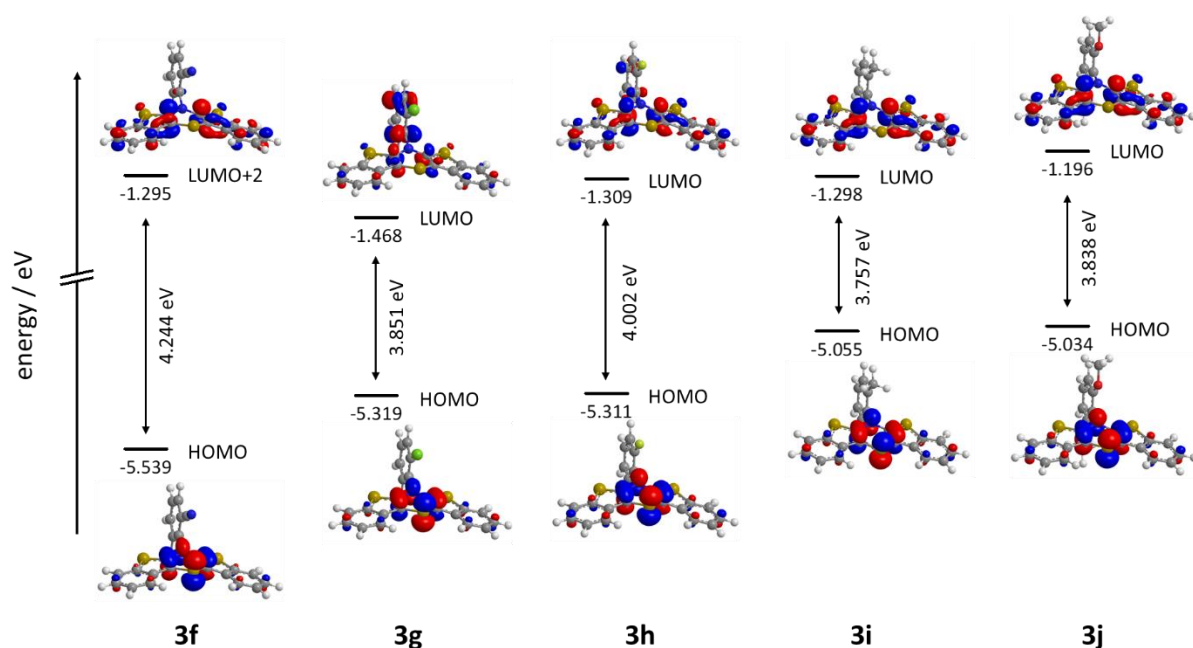

Figure 82. Selected Kohn-Sham frontier orbitals and energies using the example of **3f-j** (PBE1PBE/6-311++G\*\*, IEFPCM CH<sub>2</sub>Cl<sub>2</sub>, isosurface value at 0.05 a.u.).

## 6 Computational details

All quantum chemical calculations were carried out with Gaussian 09.<sup>13</sup> The hybrid functionals (u)B3LYP and PBE1PBE were employed,<sup>14-16</sup> as well as the basis sets 6-311G\*\*, 6-311+G\*\*, and 6-311++G\*\*.<sup>17-20</sup> The polarizable continuum model (PCM) with the integral equation formalism variant IEFPCM and SMD were used.<sup>21, 22</sup> Some calculations furthermore used time dependent methods.<sup>23, 24</sup>

### 6.1 *anti-anti-N-ortho(,ortho')*-(di)substituted-phenyl-BBTT 3

#### 6.1.1 *anti-anti-N-ortho*-cyanophenyl-BBTT 3a

##### 6.1.1.1 Minimum geometry of native BBTT in gas phase (B3LYP/6-311++G\*\*)

|              |                      |               |           |           |           |          |          |
|--------------|----------------------|---------------|-----------|-----------|-----------|----------|----------|
| Conformer I: |                      | C 0           | -3.521715 | 0.163339  | 2.553291  |          |          |
| #p           | opt=verytight        | Int=UltraFine | C 0       | -4.861286 | -0.200458 | 2.670045 |          |
| freq=noraman | rb3lyp/6-311++g(d,p) |               | C 0       | -1.330006 | 0.617698  | 3.311477 |          |
| pop=full     |                      |               | C 0       | -1.204705 | 0.923477  | 1.992276 |          |
| 0 1          |                      |               | S 0       | -2.695354 | 0.660735  | 1.078004 |          |
| C 0          | -5.334806            | -0.585558     | 3.920145  | S 0       | 0.015189  | 0.817404 | 4.468832 |
| C 0          | -4.481367            | -0.602447     | 5.033135  | C 0       | 1.333980  | 0.598066 | 3.284942 |
| C 0          | -3.149504            | -0.230411     | 4.916619  | C 0       | 1.175593  | 0.909569 | 1.962696 |
| C 0          | -2.648521            | 0.162850      | 3.665596  | N 0       | -0.012223 | 1.299688 | 1.359960 |

|                                                           |           |           |           |     |           |           |           |
|-----------------------------------------------------------|-----------|-----------|-----------|-----|-----------|-----------|-----------|
| C O                                                       | 2.652432  | 0.123785  | 3.612803  | C O | -5.337213 | -2.292491 | -0.393710 |
| C O                                                       | 3.503215  | 0.111569  | 2.483318  | C O | -4.503651 | -3.230797 | 0.234307  |
| S O                                                       | 2.655046  | 0.621295  | 1.024709  | C O | -3.173382 | -2.937271 | 0.495657  |
| C O                                                       | 3.172380  | -0.277000 | 4.853655  | C O | -2.656875 | -1.685711 | 0.125429  |
| C O                                                       | 4.500683  | -0.668650 | 4.943668  | C O | -3.508464 | -0.754725 | -0.514800 |
| C O                                                       | 5.331935  | -0.664176 | 3.813893  | C O | -4.847454 | -1.048298 | -0.772641 |
| C O                                                       | 4.839339  | -0.271956 | 2.573420  | C O | -1.334889 | -1.146552 | 0.317744  |
| C O                                                       | 0.038719  | 2.617929  | 1.093853  | C O | -1.189547 | 0.115753  | -0.166447 |
| C O                                                       | 0.036646  | 3.245179  | -0.139577 | S O | -2.659310 | 0.726272  | -0.934488 |
| C O                                                       | 0.036647  | 4.638099  | -0.194617 | S O | 0.000037  | -2.031507 | 1.100810  |
| C O                                                       | 0.036652  | 5.383919  | 0.981733  | C O | 1.334936  | -1.146518 | 0.317738  |
| C O                                                       | 0.036655  | 4.742449  | 2.215555  | C O | 1.189556  | 0.115783  | -0.166452 |
| C O                                                       | 0.036654  | 3.342649  | 2.279687  | N O | -0.000005 | 0.873288  | -0.185387 |
| C O                                                       | 0.036657  | 2.695189  | 3.555713  | C O | 2.656935  | -1.685645 | 0.125406  |
| N O                                                       | 0.036659  | 2.210279  | 4.603793  | C O | 3.508489  | -0.754640 | -0.514839 |
| H O                                                       | -6.372693 | -0.876798 | 4.031492  | S O | 2.659291  | 0.726336  | -0.934520 |
| H O                                                       | -4.868735 | -0.908058 | 5.998233  | C O | 3.173480  | -2.937189 | 0.495633  |
| H O                                                       | -2.494752 | -0.245711 | 5.780379  | C O | 4.503753  | -3.230682 | 0.234264  |
| H O                                                       | -5.518810 | -0.189703 | 1.808506  | C O | 5.337280  | -2.292358 | -0.393770 |
| H O                                                       | 2.534812  | -0.282776 | 5.730280  | C O | 4.847483  | -1.048178 | -0.772698 |
| H O                                                       | 4.902645  | -0.980078 | 5.900902  | C O | -0.000015 | 2.134637  | 0.521802  |
| H O                                                       | 6.367429  | -0.970696 | 3.904593  | C O | 0.000059  | 2.163443  | 1.914935  |
| H O                                                       | 5.479656  | -0.270766 | 1.698953  | C O | 0.000055  | 3.379030  | 2.592330  |
| H O                                                       | 0.036643  | 2.655369  | -1.048217 | C O | -0.000024 | 4.578671  | 1.879587  |
| H O                                                       | 0.036645  | 5.137429  | -1.156297 | C O | -0.000097 | 4.563135  | 0.491329  |
| H O                                                       | 0.036653  | 6.466609  | 0.940503  | C O | -0.000093 | 3.340108  | -0.198717 |
| H O                                                       | 0.036659  | 5.313339  | 3.135668  | C O | -0.000163 | 3.340875  | -1.630273 |
| SCF Done: E(RB3LYP) = -2188.03798492                      |           |           |           | N O | -0.000225 | 3.391341  | -2.784418 |
| Sum of electronic and zero-point Energies=-2187.755678    |           |           |           | H O | -6.373813 | -2.540191 | -0.590420 |
| Sum of electronic and thermal Energies=-2187.733435       |           |           |           | H O | -4.904919 | -4.197061 | 0.517152  |
| Sum of electronic and thermal Enthalpies=-2187.732490     |           |           |           | H O | -2.532737 | -3.667403 | 0.977117  |
| Sum of electronic and thermal Free Energies=-2187.810292  |           |           |           | H O | -5.489946 | -0.326385 | -1.263031 |
| Conformer II:                                             |           |           |           | H O | 2.532865  | -3.667333 | 0.977114  |
| #p opt=tight freq=norman rb3lyp/6-311++g(d,p) pop=full0 1 |           |           |           | H O | 4.905046  | -4.196937 | 0.517102  |
|                                                           |           |           |           | H O | 6.373886  | -2.540031 | -0.590494 |
|                                                           |           |           |           | H O | 5.489951  | -0.326250 | -1.263104 |
|                                                           |           |           |           | H O | 0.000120  | 1.225658  | 2.457976  |

H O 0.000112 3.390686 3.676088  
H O -0.000027 5.525550 2.406183  
H O -0.000157 5.487386 -0.072766  
SCF Done: E(RB3LYP) = -2188.03837228  
Sum of electronic and zero-point Energies=  
-2187.755888

Sum of electronic and thermal Energies=  
-2187.733803  
Sum of electronic and thermal Enthalpies=  
-2187.732858  
Sum of electronic and thermal Free  
Energies= -2187.809500

### 6.1.1.2 Minimum geometry of native BTT under IEFPCM variation of PCM

(B3LYP/6-311++G\*\*, IEFPCM CH<sub>2</sub>Cl<sub>2</sub>)

Conformer I:

#p opt=verytight Int=UltraFine  
freq=noraman rb3lyp/6-311++g(d,p)  
pop=full  
scrf=(iefpcm,solvent=dichloromethane)  
geom=check guess=read

0 1  
C O -5.343841 -2.259320 -0.526407  
C O -4.501794 -3.253558 -0.004636  
C O -3.168396 -2.985391 0.275569  
C O -2.654803 -1.701764 0.026819  
C O -3.517299 -0.715621 -0.507394  
C O -4.858041 -0.979859 -0.780679  
C O -1.333412 -1.183043 0.263099  
C O -1.195077 0.122101 -0.097376  
S O -2.677259 0.812452 -0.768232  
S O -0.000001 -2.113905 1.004915  
C O 1.333411 -1.183044 0.263100  
C O 1.195077 0.122100 -0.097376  
N O 0.000000 0.850877 -0.053487  
C O 2.654802 -1.701765 0.026820  
C O 3.517298 -0.715623 -0.507394  
S O 2.677259 0.812450 -0.768232  
C O 3.168393 -2.985394 0.275570  
C O 4.501791 -3.253561 -0.004635  
C O 5.343839 -2.259324 -0.526407  
C O 4.858040 -0.979863 -0.780679  
C O 0.000001 2.282240 -0.134200  
C O 0.000001 2.919945 -1.370968

C O 0.000002 4.313545 -1.440136  
C O 0.000004 5.074297 -0.273379  
C O 0.000003 4.449446 0.969678  
C O 0.000002 3.050666 1.046608  
C O 0.000001 2.410529 2.325504  
N O -0.000001 1.918664 3.370975  
H O -6.382312 -2.487115 -0.736034  
H O -4.898865 -4.244196 0.184557  
H O -2.525083 -3.758445 0.680211  
H O -5.506319 -0.211926 -1.185960  
H O 2.525080 -3.758447 0.680212  
H O 4.898862 -4.244200 0.184557  
H O 6.382309 -2.487120 -0.736034  
H O 5.506318 -0.211931 -1.185960  
H O 0.000000 2.323433 -2.274905  
H O 0.000003 4.800968 -2.407457  
H O 0.000005 6.155917 -0.328274  
H O 0.000004 5.033907 1.880845

SCF Done: E(RB3LYP) = -2188.05063965  
Sum of electronic and zero-point  
Energies= -2187.768205  
Sum of electronic and thermal Energies=  
-2187.746045  
Sum of electronic and thermal Enthalpies=  
-2187.745101  
Sum of electronic and thermal Free  
Energies= -2187.821535

Conformer II:

#p opt=tight freq=noraman rb3lyp/6-  
311++g(d,p) pop=full



scrf=(iefpcm,solvent=dichloromethane)  
geom=check

0 1  
C 0 -5.367545 -2.260610 -0.368854  
C 0 -4.523445 -3.242423 0.173698  
C 0 -3.183061 -2.974306 0.415722  
C 0 -2.667218 -1.704358 0.110205  
C 0 -3.530551 -0.730080 -0.443639  
C 0 -4.879092 -0.996022 -0.680723  
C 0 -1.335638 -1.187500 0.301592  
C 0 -1.192293 0.102688 -0.103063  
S 0 -2.681584 0.773790 -0.781780  
S 0 -0.000000 -2.139171 1.002997  
C 0 1.335638 -1.187500 0.301592  
C 0 1.192293 0.102688 -0.103063  
N 0 0.000000 0.851682 -0.119668  
C 0 2.667217 -1.704358 0.110206  
C 0 3.530551 -0.730080 -0.443639  
S 0 2.681584 0.773790 -0.781780  
C 0 3.183061 -2.974307 0.415722  
C 0 4.523445 -3.242423 0.173698  
C 0 5.367545 -2.260610 -0.368854  
C 0 4.879092 -0.996022 -0.680723  
C 0 0.000000 2.152178 0.512335  
C 0 -0.000000 2.264946 1.899842  
C 0 -0.000000 3.521581 2.500492

C 0 0.000000 4.675869 1.716458  
C 0 0.000000 4.577486 0.331084  
C 0 0.000000 3.313280 -0.279989  
C 0 0.000000 3.222886 -1.708061  
N 0 0.000001 3.191162 -2.863359  
H 0 -6.411319 -2.488405 -0.550608  
H 0 -4.924017 -4.222126 0.406755  
H 0 -2.537378 -3.737832 0.834518  
H 0 -5.529949 -0.239737 -1.103110  
H 0 2.537377 -3.737833 0.834518  
H 0 4.924017 -4.222126 0.406755  
H 0 6.411318 -2.488405 -0.550608  
H 0 5.529949 -0.239737 -1.103110  
H 0 -0.000000 1.365067 2.503156  
H 0 -0.000000 3.599249 3.581146  
H 0 0.000000 5.652539 2.184502  
H 0 0.000001 5.466886 -0.285926

SCF Done: E(RB3LYP) = -2188.04981290

Sum of electronic and zero-point Energies=  
-2187.767427

Sum of electronic and thermal Energies=  
-2187.745305

Sum of electronic and thermal Enthalpies=  
-2187.744361

Sum of electronic and thermal Free  
Energies= -2187.821008

### 6.1.1.3 Minimum geometry of native BBTT under IEFPCM variation of PCM

(PBE1PBE/6-311++G\*\*, IEFPCM CH<sub>2</sub>Cl<sub>2</sub>)

#p opt freq=noraman PBE1PBE/6-  
311++g(d,p)  
scrf=(iefpcm,solvent=dichloromethane)  
pop=full geom=check guess=read

0 1  
C 0 -5.321009 -2.231977 -0.540897  
C 0 -4.486111 -3.239922 -0.043114  
C 0 -3.155515 -2.986004 0.243719  
C 0 -2.638810 -1.702366 0.025651  
C 0 -3.493046 -0.701644 -0.482899

C 0 -4.831934 -0.952604 -0.764136  
C 0 -1.320490 -1.196860 0.272633  
C 0 -1.186588 0.114473 -0.058608  
S 0 -2.653436 0.816144 -0.703921  
S 0 -0.000000 -2.132693 0.993812  
C 0 1.320490 -1.196860 0.272633  
C 0 1.186588 0.114473 -0.058608  
N 0 0.000000 0.840328 0.007812  
C 0 2.638810 -1.702366 0.025651

|     |           |           |           |                                              |               |           |           |
|-----|-----------|-----------|-----------|----------------------------------------------|---------------|-----------|-----------|
| C 0 | 3.493046  | -0.701644 | -0.482899 | H 0                                          | -5.476443     | -0.171218 | -1.152180 |
| S 0 | 2.653436  | 0.816144  | -0.703921 | H 0                                          | 2.513599      | -3.770893 | 0.630980  |
| C 0 | 3.155515  | -2.986004 | 0.243719  | H 0                                          | 4.888738      | -4.233663 | 0.122426  |
| C 0 | 4.486111  | -3.239922 | -0.043114 | H 0                                          | 6.361232      | -2.450531 | -0.756926 |
| C 0 | 5.321010  | -2.231977 | -0.540897 | H 0                                          | 5.476443      | -0.171218 | -1.152180 |
| C 0 | 4.831934  | -0.952604 | -0.764136 | H 0                                          | 0.000000      | 2.215886  | -2.271564 |
| C 0 | 0.000000  | 2.257528  | -0.132201 | H 0                                          | -0.000000     | 4.687765  | -2.490167 |
| C 0 | -0.000000 | 2.846565  | -1.389216 | H 0                                          | -0.000000     | 6.112632  | -0.462576 |
| C 0 | -0.000000 | 4.233376  | -1.505718 | H 0                                          | -0.000000     | 5.070551  | 1.784935  |
| C 0 | -0.000000 | 5.032612  | -0.368817 | SCF Done:                                    | E(RPBE1PBE) = | -         |           |
| C 0 | -0.000000 | 4.454762  | 0.893280  |                                              | 2186.43191596 |           |           |
| C 0 | 0.000000  | 3.064139  | 1.016264  | Sum of electronic and zero-point Energies=   |               |           |           |
| C 0 | 0.000000  | 2.460504  | 2.309201  |                                              | -2186.146688  |           |           |
| N 0 | 0.000000  | 1.993701  | 3.365089  | Sum of electronic and thermal Energies=      |               |           |           |
| H 0 | -6.361232 | -2.450531 | -0.756926 |                                              | -2186.124621  |           |           |
| H 0 | -4.888738 | -4.233663 | 0.122426  | Sum of electronic and thermal Enthalpies=    |               |           |           |
| H 0 | -2.513599 | -3.770893 | 0.630980  |                                              | -2186.123677  |           |           |
|     |           |           |           | Sum of electronic and thermal Free Energies= |               |           |           |
|     |           |           |           |                                              | -2186.200450  |           |           |

6.1.1.4 TD-DFT calculation of ground state of native BBTT under IEFPCM variation of PCM (PBE1PBE/6-311++G\*\*, IEFPCM CH<sub>2</sub>Cl<sub>2</sub>)

```

#p td=(singlets,nstates=24) PBE1PBE/6-311++g(d,p)
scrf=(iefpcm,solvent=dichloromethane)
geom=check guess=read
<TDDFT> Excited State 1: Singlet-A
2.5559 eV 485.09 nm f=0.0000
<TDDFT>HOMO -> LUMO
98.8%
<TDDFT> Excited State 2: Singlet-A
3.0788 eV 402.71 nm f=0.1146
<TDDFT>HOMO -> LUMO+1
84.2%
<TDDFT>HOMO -> LUMO+2
12.3%
<TDDFT> Excited State 3: Singlet-A
3.3421 eV 370.98 nm f=0.0143
<TDDFT>HOMO -> LUMO+1
13.2%
<TDDFT>HOMO -> LUMO+2
84.4%
<TDDFT> Excited State 4: Singlet-A
3.9209 eV 316.21 nm f=0.0181
<TDDFT>HOMO -> LUMO+5
74.3%
<TDDFT>HOMO -> LUMO+7
17.1%
<TDDFT>HOMO -> LUMO+10 2.5%
<TDDFT> Excited State 5: Singlet-A
3.9247 eV 315.91 nm f=0.0596
<TDDFT>HOMO-1 -> LUMO
34.3%
<TDDFT>HOMO -> LUMO+3
50.8%
<TDDFT>HOMO -> LUMO+4 3.8%
<TDDFT>HOMO -> LUMO+6 6.1%
<TDDFT> Excited State 6: Singlet-A
3.9459 eV 314.21 nm f=0.0417
<TDDFT>HOMO-1 -> LUMO
62.7%

```

|                                                           |           |                                                           |           |
|-----------------------------------------------------------|-----------|-----------------------------------------------------------|-----------|
| <TDDFT>HOMO -> LUMO+3<br>34.4%                            |           | <TDDFT>HOMO-2 -> LUMO+1<br>73.0%                          |           |
| <TDDFT> Excited State 7:<br>3.9846 eV 311.16 nm f=0.0002  | Singlet-A | <TDDFT>HOMO-2 -> LUMO+2<br>8.1%                           |           |
| <TDDFT>HOMO -> LUMO+3<br>3.7%                             |           | <TDDFT>HOMO-1 -> LUMO+4<br>2.2%                           |           |
| <TDDFT>HOMO -> LUMO+4<br>91.3%                            |           | <TDDFT>HOMO -> LUMO+10<br>2.3%                            |           |
| <TDDFT> Excited State 8:<br>4.0667 eV 304.88 nm f=0.0008  | Singlet-A | <TDDFT>HOMO -> LUMO+14<br>5.4%                            |           |
| <TDDFT>HOMO-2 -> LUMO<br>96.6%                            |           | <TDDFT> Excited State 15:<br>4.7176 eV 262.81 nm f=0.0460 | Singlet-A |
| <TDDFT> Excited State 9:<br>4.1648 eV 297.69 nm f=0.0052  | Singlet-A | <TDDFT>HOMO-3 -> LUMO+1<br>2.5%                           |           |
| <TDDFT>HOMO -> LUMO+5<br>19.6%                            |           | <TDDFT>HOMO-2 -> LUMO+3<br>2.3%                           |           |
| <TDDFT>HOMO -> LUMO+7<br>69.9%                            |           | <TDDFT>HOMO-1 -> LUMO+1<br>3.4%                           |           |
| <TDDFT>HOMO -> LUMO+10<br>4.2%                            |           | <TDDFT>HOMO-1 -> LUMO+2<br>85.0%                          |           |
| <TDDFT> Excited State 10:<br>4.2166 eV 294.04 nm f=0.0320 | Singlet-A | <TDDFT> Excited State 16:<br>4.8173 eV 257.37 nm f=0.0051 | Singlet-A |
| <TDDFT>HOMO -> LUMO+3<br>6.3%                             |           | <TDDFT>HOMO -> LUMO+8<br>12.6%                            |           |
| <TDDFT>HOMO -> LUMO+6<br>70.9%                            |           | <TDDFT>HOMO -> LUMO+9<br>77.3%                            |           |
| <TDDFT>HOMO -> LUMO+8<br>14.0%                            |           | <TDDFT>HOMO -> LUMO+13<br>2.0%                            |           |
| <TDDFT> Excited State 11:<br>4.4890 eV 276.20 nm f=0.0075 | Singlet-A | <TDDFT>HOMO -> LUMO+15<br>2.4%                            |           |
| <TDDFT>HOMO -> LUMO+6<br>14.9%                            |           | <TDDFT> Excited State 17:<br>4.8364 eV 256.36 nm f=0.0124 | Singlet-A |
| <TDDFT>HOMO -> LUMO+8<br>63.8%                            |           | <TDDFT>HOMO-2 -> LUMO+1<br>16.2%                          |           |
| <TDDFT>HOMO -> LUMO+9<br>12.9%                            |           | <TDDFT>HOMO-2 -> LUMO+2<br>75.7%                          |           |
| <TDDFT>HOMO -> LUMO+13<br>4.0%                            |           | <TDDFT>HOMO -> LUMO+14<br>2.3%                            |           |
| <TDDFT> Excited State 12:<br>4.5393 eV 273.13 nm f=0.0031 | Singlet-A | <TDDFT> Excited State 18:<br>4.8897 eV 253.56 nm f=0.2854 | Singlet-A |
| <TDDFT>HOMO-3 -> LUMO<br>98.3%                            |           | <TDDFT>HOMO-2 -> LUMO+1<br>2.9%                           |           |
| <TDDFT> Excited State 13:<br>4.5959 eV 269.77 nm f=0.0864 | Singlet-A | <TDDFT>HOMO-2 -> LUMO+2<br>8.4%                           |           |
| <TDDFT>HOMO-1 -> LUMO+1<br>88.9%                          |           | <TDDFT>HOMO -> LUMO+7<br>2.9%                             |           |
| <TDDFT> Excited State 14:<br>4.6298 eV 267.80 nm f=0.1586 | Singlet-A | <TDDFT>HOMO -> LUMO+10<br>45.9%                           |           |
|                                                           |           | <TDDFT>HOMO -> LUMO+14<br>27.0%                           |           |
|                                                           |           | <TDDFT>HOMO -> LUMO+23<br>2.4%                            |           |
|                                                           |           | <TDDFT> Excited State 19:<br>4.9813 eV 248.90 nm f=0.0078 | Singlet-A |
|                                                           |           | <TDDFT>HOMO -> LUMO+11<br>74.5%                           |           |

|                                                                     |  |                                                                     |  |
|---------------------------------------------------------------------|--|---------------------------------------------------------------------|--|
| <TDDFT>HOMO -> LUMO+13<br>21.1%                                     |  | <TDDFT>HOMO -> LUMO+14<br>44.0%                                     |  |
| <TDDFT> Excited State 20: Singlet-A<br>5.0271 eV 246.63 nm f=0.0084 |  | <TDDFT>HOMO -> LUMO+16 9.3%                                         |  |
| <TDDFT>HOMO-4 -> LUMO<br>96.9%                                      |  | <TDDFT> Excited State 23: Singlet-A<br>5.0960 eV 243.30 nm f=0.0435 |  |
| <TDDFT> Excited State 21: Singlet-A<br>5.0679 eV 244.64 nm f=0.0362 |  | <TDDFT>HOMO-6 -> LUMO<br>54.3%                                      |  |
| <TDDFT>HOMO-6 -> LUMO 3.2%                                          |  | <TDDFT>HOMO-5 -> LUMO 4.7%                                          |  |
| <TDDFT>HOMO-4 -> LUMO+4 2.7%                                        |  | <TDDFT>HOMO-5 -> LUMO+1<br>10.7%                                    |  |
| <TDDFT>HOMO-3 -> LUMO+1<br>45.9%                                    |  | <TDDFT>HOMO-5 -> LUMO+2<br>10.2%                                    |  |
| <TDDFT>HOMO-3 -> LUMO+2 2.7%                                        |  | <TDDFT>HOMO-3 -> LUMO+2 9.9%                                        |  |
| <TDDFT>HOMO-2 -> LUMO+3<br>11.2%                                    |  | <TDDFT>HOMO-2 -> LUMO+3 3.6%                                        |  |
| <TDDFT>HOMO-2 -> LUMO+4 2.4%                                        |  | <TDDFT> Excited State 24: Singlet-A<br>5.1183 eV 242.24 nm f=0.0609 |  |
| <TDDFT>HOMO-1 -> LUMO+2 5.3%                                        |  | <TDDFT>HOMO-4 -> LUMO 2.1%                                          |  |
| <TDDFT>HOMO-1 -> LUMO+5<br>12.0%                                    |  | <TDDFT>HOMO-2 -> LUMO+5<br>10.6%                                    |  |
| <TDDFT>HOMO-1 -> LUMO+7 3.4%                                        |  | <TDDFT>HOMO-2 -> LUMO+7 2.1%                                        |  |
| <TDDFT> Excited State 22: Singlet-A<br>5.0917 eV 243.50 nm f=0.0474 |  | <TDDFT>HOMO-1 -> LUMO+3<br>55.4%                                    |  |
| <TDDFT>HOMO -> LUMO+7 4.6%                                          |  | <TDDFT>HOMO-1 -> LUMO+4<br>10.1%                                    |  |
| <TDDFT>HOMO -> LUMO+10<br>32.9%                                     |  | <TDDFT>HOMO-1 -> LUMO+6 4.2%                                        |  |

#### 6.1.1.5 Minimum geometry of excited state of native BBTT under IEFPCM variation of PCM

(PBE1PBE/6-311++G\*\*, IEFPCM CH<sub>2</sub>Cl<sub>2</sub>)

```

#p opt td=(nstates=4) PBE1PBE/6-311++g(d,p) freq
scrf=(iefpcm,solvent=dichloromethane)
geom=check guess=read
0 1
C 0 -5.462636 -2.008844 -0.047534
C 0 -4.624264 -3.125421 0.063333
C 0 -3.249329 -2.982320 0.055018
C 0 -2.699461 -1.699541 -0.066704
C 0 -3.556455 -0.586375 -0.178305
C 0 -4.938997 -0.730340 -0.169664
C 0 -1.325081 -1.296834 -0.096574
C 0 -1.178152 0.072882 -0.227836
S 0 -2.682807 0.925131 -0.327422
S 0 0.000000 -2.402137 0.029936
C 0 1.325081 -1.296834 -0.096575
C 0 1.178152 0.072882 -0.227837
N 0 0.000000 0.756165 -0.288213
C 0 2.699461 -1.699541 -0.066705
C 0 3.556456 -0.586375 -0.178305
S 0 2.682807 0.925132 -0.327422
C 0 3.249330 -2.982320 0.055017
C 0 4.624265 -3.125420 0.063333
C 0 5.462636 -2.008843 -0.047533
C 0 4.938997 -0.730340 -0.169663
C 0 -0.000000 2.193549 -0.315732
C 0 -0.000000 2.859914 -1.530239

```

|     |           |           |           |                                            |               |              |           |
|-----|-----------|-----------|-----------|--------------------------------------------|---------------|--------------|-----------|
| C 0 | -0.000000 | 4.246760  | -1.576775 | H 0                                        | 5.590811      | 0.131816     | -0.253705 |
| C 0 | -0.000000 | 4.967983  | -0.345768 | H 0                                        | -0.000000     | 2.274636     | -2.445519 |
| C 0 | -0.000000 | 4.326216  | 0.861809  | H 0                                        | -0.000000     | 4.765304     | -2.526708 |
| C 0 | -0.000001 | 2.894548  | 0.951631  | H 0                                        | 0.000000      | 6.053274     | -0.363734 |
| C 0 | -0.000000 | 2.225240  | 2.165392  | H 0                                        | -0.000000     | 4.898039     | 1.783826  |
| N 0 | -0.000001 | 1.642295  | 3.186367  | SCF Done:                                  | E(RPBE1PBE)   | =            | -         |
| H 0 | -6.538674 | -2.143041 | -0.037283 |                                            | 2186.41903481 |              |           |
| H 0 | -5.059528 | -4.113853 | 0.158360  | Sum of electronic and zero-point Energies= |               |              |           |
| H 0 | -2.606299 | -3.852037 | 0.143068  |                                            | -2186.074867  |              |           |
| H 0 | -5.590810 | 0.131816  | -0.253706 | Sum of electronic and thermal Energies=    |               |              |           |
| H 0 | 2.606299  | -3.852037 | 0.143067  |                                            | -2186.052686  |              |           |
| H 0 | 5.059528  | -4.113853 | 0.158360  | Sum of electronic and thermal Enthalpies=  |               |              |           |
| H 0 | 6.538674  | -2.143040 | -0.037282 |                                            | -2186.051742  |              |           |
|     |           |           |           | Sum of electronic and thermal Free         |               |              |           |
|     |           |           |           | Energies=                                  |               | -2186.127167 |           |

6.1.1.6 TD-DFT calculation of excited state of native BBTT under IEFPCM variation of PCM (PBE1PBE/6-311++G\*\*, IEFPCM CH<sub>2</sub>Cl<sub>2</sub>)

|                                                  |                                    |
|--------------------------------------------------|------------------------------------|
| #p opt td=(nstates=4) PBE1PBE/6-311++g(d,p) freq | <TDDFT> Excited State 3: Singlet-A |
| scrf=(iefpcm,solvent=dichloromethane)            | 2.8924 eV 428.66 nm f=0.0046       |
| geom=check guess=read                            | <TDDFT>HOMO -> LUMO+2              |
| <TDDFT> Excited State 1: Singlet-A               | 97.8%                              |
| 1.6688 eV 742.94 nm f=0.0000                     | <TDDFT> Excited State 4: Singlet-A |
| <TDDFT>HOMO -> LUMO                              | 3.5146 eV 352.77 nm f=0.0001       |
| 99.4%                                            | <TDDFT>HOMO-1 -> LUMO              |
| <TDDFT> Excited State 2: Singlet-A               | 83.4%                              |
| 2.5098 eV 494.00 nm f=0.1168                     | <TDDFT>HOMO -> LUMO+6              |
| <TDDFT>HOMO -> LUMO+1                            | 12.9%                              |
| 96.9%                                            |                                    |

6.1.1.7 Minimum geometry of native BBTT under SMD variation of PCM (B3LYP/6-311++G\*\*, SMD CH<sub>2</sub>Cl<sub>2</sub>)

|                                    |           |           |           |           |          |           |           |
|------------------------------------|-----------|-----------|-----------|-----------|----------|-----------|-----------|
| Conformer I:                       | C 0       | -2.654063 | -1.697244 | 0.026286  |          |           |           |
| #p opt=verytight Int=UltraFine     | C 0       | -3.517672 | -0.721643 | -0.525100 |          |           |           |
| freq=noraman rb3lyp/6-311++g(d,p)  | C 0       | -4.858415 | -0.990893 | -0.793867 |          |           |           |
| pop=full                           | C 0       | -1.334113 | -1.171315 | 0.257053  |          |           |           |
| scrf=(SMD,solvent=dichloromethane) | C 0       | -1.194422 | 0.127771  | -0.124143 |          |           |           |
| geom=check guess=read              | S 0       | -2.677719 | 0.802899  | -0.812905 |          |           |           |
| 0 1                                | S 0       | 0.000000  | -2.087496 | 1.016912  |          |           |           |
| C 0                                | -5.342755 | -2.266404 | -0.517250 | C 0       | 1.334113 | -1.171315 | 0.257053  |
| C 0                                | -4.499810 | -3.250807 | 0.021549  | C 0       | 1.194422 | 0.127771  | -0.124143 |
| C 0                                | -3.166596 | -2.976939 | 0.297482  |           |          |           |           |

N 0 -0.000000 0.856695 -0.091869  
 C 0 2.654063 -1.697244 0.026286  
 C 0 3.517672 -0.721643 -0.525100  
 S 0 2.677719 0.802899 -0.812905  
 C 0 3.166596 -2.976939 0.297482  
 C 0 4.499810 -3.250807 0.021549  
 C 0 5.342755 -2.266404 -0.517250  
 C 0 4.858415 -0.990893 -0.793867  
 C 0 -0.000000 2.291491 -0.133995  
 C 0 -0.000000 2.958903 -1.354833  
 C 0 -0.000000 4.354194 -1.390014  
 C 0 -0.000000 5.086470 -0.205455  
 C 0 -0.000000 4.432068 1.022444  
 C 0 -0.000000 3.031860 1.065829  
 C 0 -0.000000 2.364735 2.330225  
 N 0 -0.000000 1.853359 3.366145  
 H 0 -6.381300 -2.498915 -0.722999  
 H 0 -4.895959 -4.238620 0.228490  
 H 0 -2.524698 -3.743859 0.716437  
 H 0 -5.508687 -0.231258 -1.212462  
 H 0 2.524698 -3.743859 0.716437  
 H 0 4.895959 -4.238620 0.228490  
 H 0 6.381300 -2.498915 -0.722999  
 H 0 5.508687 -0.231258 -1.212462  
 H 0 -0.000000 2.385312 -2.273945  
 H 0 -0.000000 4.864400 -2.345976  
 H 0 -0.000000 6.169607 -0.233874  
 H 0 -0.000000 4.994151 1.947981  
 SCF Done: E(RB3LYP) = -  
 2188.07391381  
 Sum of electronic and zero-point  
 Energies= -2187.791589  
 Sum of electronic and thermal Energies=  
 -2187.769433  
 Sum of electronic and thermal  
 Enthalpies= -2187.768489  
 Sum of electronic and thermal Free  
 Energies= -2187.844721

Conformer II:  
 #p opt=tight freq=noraman rb3lyp/6-  
 311++g(d,p) pop=full  
 scrf=(SMD,solvent=dichloromethane)  
 geom=check  
 0 1  
 C 0 -5.375026 -2.255084 -0.356883  
 C 0 -4.528140 -3.241161 0.173445  
 C 0 -3.185468 -2.976795 0.407396  
 C 0 -2.669915 -1.705618 0.105456  
 C 0 -3.536527 -0.727811 -0.436518  
 C 0 -4.887319 -0.989196 -0.665389  
 C 0 -1.336285 -1.190473 0.290640  
 C 0 -1.191738 0.101190 -0.108694  
 S 0 -2.686449 0.776781 -0.773831  
 S 0 -0.000000 -2.148438 0.983323  
 C 0 1.336285 -1.190473 0.290640  
 C 0 1.191738 0.101190 -0.108694  
 N 0 0.000000 0.850718 -0.129060  
 C 0 2.669915 -1.705619 0.105456  
 C 0 3.536526 -0.727812 -0.436518  
 S 0 2.686449 0.776781 -0.773831  
 C 0 3.185467 -2.976795 0.407397  
 C 0 4.528140 -3.241161 0.173445  
 C 0 5.375026 -2.255084 -0.356883  
 C 0 4.887319 -0.989197 -0.665389  
 C 0 0.000000 2.150739 0.507656  
 C 0 -0.000000 2.256196 1.895220  
 C 0 0.000000 3.510672 2.500873  
 C 0 0.000000 4.668706 1.722203  
 C 0 0.000000 4.577917 0.336265  
 C 0 0.000000 3.315844 -0.279935  
 C 0 0.000000 3.231547 -1.707737  
 N 0 0.000001 3.202796 -2.863064  
 H 0 -6.420691 -2.480652 -0.532330  
 H 0 -4.928194 -4.222016 0.404108  
 H 0 -2.539855 -3.745608 0.817159  
 H 0 -5.541230 -0.230048 -1.078941

|     |           |           |           |                                           |
|-----|-----------|-----------|-----------|-------------------------------------------|
| H O | 2.539854  | -3.745608 | 0.817160  | SCF Done: E(RB3LYP) = -                   |
| H O | 4.928194  | -4.222016 | 0.404108  | 2188.07265824                             |
| H O | 6.420690  | -2.480652 | -0.532330 | Sum of electronic and zero-point          |
| H O | 5.541230  | -0.230048 | -1.078941 | Energies= -2187.790377                    |
| H O | -0.000000 | 1.352836  | 2.493845  | Sum of electronic and thermal Energies=   |
| H O | -0.000000 | 3.583320  | 3.582271  | -2187.768266                              |
| H O | 0.000000  | 5.643555  | 2.194967  | Sum of electronic and thermal Enthalpies= |
| H O | 0.000000  | 5.470022  | -0.277483 | -2187.767322                              |
|     |           |           |           | Sum of electronic and thermal Free        |
|     |           |           |           | Energies= -2187.843958                    |

#### 6.1.1.8 Minimum geometry of radical cation of BBTT in gas phase (B3LYP/6-311++G\*\*)

|                               |           |           |           |                                         |           |           |           |
|-------------------------------|-----------|-----------|-----------|-----------------------------------------|-----------|-----------|-----------|
| #p ub3lyp/6-311++g(d,p) opt   | C O       | 0.000062  | 4.997057  | -0.362857                               |           |           |           |
| freq=norman scf=maxcycle=1000 | C O       | 0.000221  | 4.338288  | 0.863401                                |           |           |           |
| 0 1                           | C O       | 0.000191  | 2.939137  | 0.905988                                |           |           |           |
| C O                           | 5.478134  | -2.051781 | -0.049572 | C O                                     | 0.000319  | 2.238748  | 2.151998  |
| C O                           | 4.622860  | -3.159633 | 0.055978  | N O                                     | 0.000430  | 1.646690  | 3.143364  |
| C O                           | 3.247462  | -2.998047 | 0.046781  | H O                                     | 6.551008  | -2.200733 | -0.038992 |
| C O                           | 2.711250  | -1.703789 | -0.069560 | H O                                     | 5.045004  | -4.152720 | 0.146996  |
| C O                           | 3.589455  | -0.602338 | -0.174966 | H O                                     | 2.596486  | -3.860819 | 0.130181  |
| C O                           | 4.971134  | -0.761556 | -0.166942 | H O                                     | 5.636206  | 0.089473  | -0.246771 |
| C O                           | 1.337700  | -1.283781 | -0.097157 | H O                                     | -2.596636 | -3.860752 | 0.130131  |
| C O                           | 1.196746  | 0.090976  | -0.219295 | H O                                     | -5.045163 | -4.152584 | 0.146984  |
| S O                           | 2.726226  | 0.932811  | -0.311629 | H O                                     | -6.551115 | -2.200542 | -0.038831 |
| S O                           | -0.000055 | -2.395463 | 0.029973  | H O                                     | -5.636252 | 0.089650  | -0.246506 |
| C O                           | -1.337779 | -1.283745 | -0.097189 | H O                                     | -0.000279 | 2.307698  | -2.448979 |
| C O                           | -1.196788 | 0.091004  | -0.219313 | H O                                     | -0.000262 | 4.792256  | -2.505482 |
| N O                           | -0.000009 | 0.773028  | -0.267109 | H O                                     | 0.000086  | 6.079943  | -0.386226 |
| C O                           | -2.711345 | -1.703712 | -0.069526 | H O                                     | 0.000368  | 4.895321  | 1.791708  |
| C O                           | -3.589519 | -0.602230 | -0.174850 | SCF Done: E(UB3LYP) = -                 |           |           |           |
| S O                           | -2.726248 | 0.932901  | -0.311504 | 2187.81436354                           |           |           |           |
| C O                           | -3.247590 | -2.997958 | 0.046771  | Sum of electronic and zero-point        |           |           |           |
| C O                           | -4.622993 | -3.159505 | 0.056013  | Energies= -2187.531399                  |           |           |           |
| C O                           | -5.478237 | -2.051621 | -0.049447 | Sum of electronic and thermal Energies= |           |           |           |
| C O                           | -4.971204 | -0.761405 | -0.166772 | -2187.509326                            |           |           |           |
| C O                           | 0.000008  | 2.223096  | -0.305759 | Sum of electronic and thermal           |           |           |           |
| C O                           | -0.000152 | 2.880070  | -1.529187 | Enthalpies= -2187.508381                |           |           |           |
| C O                           | -0.000129 | 4.274689  | -1.554111 | Sum of electronic and thermal Free      |           |           |           |
|                               |           |           |           | Energies= -2187.584556                  |           |           |           |

#### 6.1.1.9 Minimum geometry of radical cation of BBTT under IEFPCM variation of PCM (B3LYP/6-311++G\*\*, IEFPCM CH<sub>2</sub>Cl<sub>2</sub>)

#p ub3lyp/6-311++g(d,p) opt freq=noraman  
 scf=maxcycle=1000  
 scrf=(iefpcm,solvent=dichloromethane)  
 geom=check guess=read

0 1  
 C O 5.477915 -2.059130 -0.050115  
 C O 4.622635 -3.168325 0.044684  
 C O 3.246404 -3.007051 0.039399  
 C O 2.710180 -1.711753 -0.062554  
 C O 3.587432 -0.608717 -0.157950  
 C O 4.970007 -0.767838 -0.153043  
 C O 1.335475 -1.293042 -0.084680  
 C O 1.195667 0.082398 -0.193019  
 S O 2.724070 0.926611 -0.280642  
 S O 0.000001 -2.406667 0.024868  
 C O -1.335474 -1.293042 -0.084681  
 C O -1.195666 0.082397 -0.193020  
 N O 0.000000 0.764907 -0.227748  
 C O -2.710178 -1.711754 -0.062555  
 C O -3.587431 -0.608719 -0.157952  
 S O -2.724069 0.926609 -0.280645  
 C O -3.246401 -3.007053 0.039397  
 C O -4.622633 -3.168327 0.044682  
 C O -5.477913 -2.059133 -0.050117  
 C O -4.970006 -0.767841 -0.153045  
 C O -0.000000 2.212535 -0.308344  
 C O 0.000002 2.826447 -1.552996

C O 0.000002 4.219426 -1.626775  
 C O -0.000000 4.984405 -0.463006  
 C O -0.000003 4.369792 0.785615  
 C O -0.000004 2.972757 0.876298  
 C O -0.000007 2.334816 2.155346  
 N O -0.000010 1.820541 3.189495  
 H O 6.550918 -2.207340 -0.042999  
 H O 5.044309 -4.162680 0.123918  
 H O 2.595423 -3.870140 0.114279  
 H O 5.633531 0.084746 -0.225305  
 H O -2.595420 -3.870141 0.114278  
 H O -5.044306 -4.162683 0.123917  
 H O -6.550916 -2.207343 -0.043001  
 H O -5.633530 0.084743 -0.225308  
 H O 0.000004 2.221137 -2.450757  
 H O 0.000004 4.701422 -2.596261  
 H O -0.000000 6.065434 -0.524125  
 H O -0.000005 4.960370 1.692417  
 SCF Done: E(UB3LYP) = -2187.87071371  
 Sum of electronic and zero-point Energies=  
 -2187.587632  
 Sum of electronic and thermal Energies=  
 -2187.565540  
 Sum of electronic and thermal Enthalpies=  
 -2187.564596  
 Sum of electronic and thermal Free  
 Energies= -2187.641331

6.1.1.10 Minimum geometry of radical cation of BBTT under SMD variation of PCM

(B3LYP/6-311++G\*\*, SMD CH<sub>2</sub>Cl<sub>2</sub>)

#p ub3lyp/6-311++g(d,p) opt  
 freq=noraman scf=maxcycle=1000  
 scrf=(SMD,solvent=dichloromethane)

0 1  
 C O 5.475000 -2.072545 -0.054440  
 C O 4.616788 -3.180782 0.024085  
 C O 3.240914 -3.016241 0.023707  
 C O 2.709332 -1.717316 -0.056426  
 C O 3.589761 -0.615883 -0.138191

C O 4.971713 -0.777600 -0.137575  
 C O 1.336434 -1.294645 -0.071424  
 C O 1.194718 0.081393 -0.162534  
 S O 2.727363 0.923694 -0.240923  
 S O 0.000237 -2.410753 0.019689  
 C O -1.336160 -1.294883 -0.071443  
 C O -1.194673 0.081190 -0.162477  
 N O -0.000045 0.764642 -0.190239  
 C O -2.708988 -1.717750 -0.056323



|     |           |           |           |                                         |           |           |           |
|-----|-----------|-----------|-----------|-----------------------------------------|-----------|-----------|-----------|
| C 0 | -3.589576 | -0.616439 | -0.138049 | H 0                                     | 5.639574  | 0.073322  | -0.197681 |
| S 0 | -2.727412 | 0.923251  | -0.240900 | H 0                                     | -2.587702 | -3.880320 | 0.084897  |
| C 0 | -3.240398 | -3.016745 | 0.023865  | H 0                                     | -5.035389 | -4.178419 | 0.087163  |
| C 0 | -4.616250 | -3.181460 | 0.024366  | H 0                                     | -6.547416 | -2.225466 | -0.050425 |
| C 0 | -5.474618 | -2.073345 | -0.054175 | H 0                                     | -5.639470 | 0.072491  | -0.197653 |
| C 0 | -4.971505 | -0.778337 | -0.137409 | H 0                                     | -0.000833 | 2.146288  | -2.452142 |
| C 0 | -0.000239 | 2.210262  | -0.310210 | H 0                                     | -0.001325 | 4.622804  | -2.677906 |
| C 0 | -0.000692 | 2.782489  | -1.574918 | H 0                                     | -0.001084 | 6.053278  | -0.650474 |
| C 0 | -0.000984 | 4.172391  | -1.692902 | H 0                                     | -0.000353 | 5.020169  | 1.602515  |
| C 0 | -0.000859 | 4.974430  | -0.554251 | SCF Done: E(UB3LYP) = -                 |           |           |           |
| C 0 | -0.000435 | 4.401572  | 0.714158  | 2187.89747338                           |           |           |           |
| C 0 | -0.000137 | 3.007903  | 0.850079  | Sum of electronic and zero-point        |           |           |           |
| C 0 | 0.000221  | 2.415561  | 2.150229  | Energies= -2187.614475                  |           |           |           |
| N 0 | 0.000416  | 1.943866  | 3.204321  | Sum of electronic and thermal Energies= |           |           |           |
| H 0 | 6.547821  | -2.224516 | -0.050732 | -2187.592539                            |           |           |           |
| H 0 | 5.036068  | -4.177690 | 0.086730  | Sum of electronic and thermal           |           |           |           |
| H 0 | 2.588323  | -3.879889 | 0.084816  | Enthalpies= -2187.591595                |           |           |           |
|     |           |           |           | Sum of electronic and thermal Free      |           |           |           |
|     |           |           |           | Energies= -2187.666923                  |           |           |           |

#### 6.1.1.11 Transition state of native BBTT under IEFPCM variation of PCM (B3LYP/6-311++G\*\*,

##### IEFPCM CH<sub>2</sub>Cl<sub>2</sub>)

```
#p opt=(ts,noeigen,calcfc) freq=noraman
B3LYP/6-311++g(d,p) pop=full
scrf=(iefpcm,solvent=dichloromethane)
0 1
```

|     |           |           |           |     |           |           |           |
|-----|-----------|-----------|-----------|-----|-----------|-----------|-----------|
| C 0 | 5.496972  | -2.091051 | -0.050899 | C 0 | -3.609137 | -0.624066 | -0.033774 |
| C 0 | 4.630865  | -3.194827 | -0.060191 | S 0 | -2.741642 | 0.908033  | -0.021978 |
| C 0 | 3.252725  | -3.021924 | -0.058038 | C 0 | -3.251527 | -3.022884 | -0.058496 |
| C 0 | 2.719369  | -1.721577 | -0.045521 | C 0 | -4.629615 | -3.196230 | -0.060799 |
| C 0 | 3.609563  | -0.622984 | -0.033623 | C 0 | -5.496077 | -2.092738 | -0.051549 |
| C 0 | 4.992097  | -0.793481 | -0.038793 | C 0 | -4.991614 | -0.795006 | -0.039154 |
| C 0 | 1.343258  | -1.301165 | -0.051265 | C 0 | -0.000351 | 2.176883  | -0.329186 |
| C 0 | 1.198905  | 0.052326  | -0.041334 | C 0 | -0.001127 | 3.132567  | 0.704227  |
| S 0 | 2.741585  | 0.908847  | -0.022135 | C 0 | -0.001423 | 4.499499  | 0.390001  |
| S 0 | 0.000494  | -2.480479 | -0.053318 | C 0 | -0.000896 | 4.902376  | -0.940218 |
| C 0 | -1.342614 | -1.301526 | -0.051337 | C 0 | -0.000073 | 3.953405  | -1.962087 |
| C 0 | -1.198628 | 0.052022  | -0.041167 | C 0 | 0.000190  | 2.593909  | -1.657186 |
| N 0 | -0.000116 | 0.778218  | -0.000374 | C 0 | -0.001531 | 2.719139  | 2.074044  |
| C 0 | -2.718583 | -1.722369 | -0.045735 | N 0 | -0.001835 | 2.416959  | 3.189247  |
|     |           |           |           | H 0 | 6.569379  | -2.246290 | -0.052050 |
|     |           |           |           | H 0 | 5.043128  | -4.197173 | -0.069018 |
|     |           |           |           | H 0 | 2.594426  | -3.883354 | -0.065576 |

H O 5.659592 0.060050 -0.031283  
H O -2.592955 -3.884104 -0.066119  
H O -5.041553 -4.198709 -0.069698  
H O -6.568435 -2.248317 -0.052976  
H O -5.659384 0.058309 -0.031590  
H O -0.002023 5.230056 1.188587  
H O -0.001111 5.958814 -1.178817  
H O 0.000337 4.270518 -2.997883  
H O 0.000780 1.849750 -2.444305

SCF Done: E(RB3LYP) = -  
2188.04905185  
Sum of electronic and zero-point  
Energies= -2187.766897  
Sum of electronic and thermal Energies=  
-2187.745520  
Sum of electronic and thermal  
Enthalpies= -2187.744576  
Sum of electronic and thermal Free  
Energies= -2187.818411

## 6.1.2 anti-anti-N-ortho-chlorophenyl-BBTT 3b

### 6.1.2.1 Minimum geometry of native BBTT in gas phase (B3LYP/6-311++G\*\*)

Conformer I:

#p opt freq=noraman rb3lyp/6-311++g(d,p)  
pop=full

0 1

C O 5.360293 -2.298046 -0.463189  
C O 4.514236 -3.271340 0.088302  
C O 3.176251 -2.996667 0.334706  
C O 2.661589 -1.728497 0.021703  
C O 3.527877 -0.763292 -0.542653  
C O 4.873181 -1.034306 -0.781577  
C O 1.334463 -1.207588 0.215324  
C O 1.195233 0.078645 -0.205076  
S O 2.685634 0.746187 -0.883369  
S O 0.000379 -2.120580 0.975352  
C O -1.333720 -1.208276 0.214485  
C O -1.194932 0.078120 -0.205547  
N O -0.000008 0.803888 -0.237016  
C O -2.660711 -1.729478 0.021166  
C O -3.527402 -0.764374 -0.542820  
S O -2.685664 0.745403 -0.883510  
C O -3.174959 -2.997774 0.334062  
C O -4.512969 -3.272756 0.088014  
C O -5.359435 -2.299627 -0.463172  
C O -4.872646 -1.035785 -0.781703  
C O -0.000352 2.234913 -0.218054  
C O -0.000899 2.947553 0.989670

C O -0.001247 4.339354 0.989812  
C O -0.001023 5.029437 -0.219834  
C O -0.000467 4.335335 -1.427269  
C O -0.000149 2.943451 -1.421716  
Cl O -0.001189 2.091930 2.512775  
H O 6.402816 -2.530456 -0.646521  
H O 4.911774 -4.251175 0.326733  
H O 2.527248 -3.753814 0.759769  
H O 5.524989 -0.282145 -1.210731  
H O -2.525704 -3.754836 0.758851  
H O -4.910213 -4.252701 0.326495  
H O -6.401867 -2.532369 -0.646469  
H O -5.524624 -0.283690 -1.210757  
H O -0.001686 4.871248 1.932566  
H O -0.001286 6.113257 -0.213177  
H O -0.000298 4.872113 -2.368194  
H O 0.000253 2.384368 -2.350013

SCF Done: E(RB3LYP) = -  
2555.39654430  
Sum of electronic and zero-point  
Energies= -2555.122249  
Sum of electronic and thermal Energies=  
-2555.100673  
Sum of electronic and thermal  
Enthalpies= -2555.099729  
Sum of electronic and thermal Free  
Energies= -2555.175399

Conformer II:  
 #p opt freq=noraman rb3lyp/6-311++g(d,p)  
 pop=full

0 1  
 C 0 -5.342272 -2.340780 -0.417539  
 C 0 -4.502666 -3.319696 0.135266  
 C 0 -3.169743 -3.044042 0.404335  
 C 0 -2.655909 -1.769809 0.116653  
 C 0 -3.513818 -0.797789 -0.449503  
 C 0 -4.855186 -1.072552 -0.713138  
 C 0 -1.334352 -1.244028 0.340078  
 C 0 -1.190792 0.049320 -0.056189  
 S 0 -2.668338 0.711036 -0.769818  
 S 0 0.000380 -2.171826 1.075964  
 C 0 1.334969 -1.243509 0.340417  
 C 0 1.191040 0.049775 -0.055932  
 N 0 -0.000026 0.793636 -0.039306  
 C 0 2.656658 -1.768951 0.116847  
 C 0 3.514163 -0.796707 -0.449559  
 S 0 2.668260 0.7111770 -0.769680  
 C 0 3.170934 -3.042984 0.404593  
 C 0 4.503889 -3.318219 0.135457  
 C 0 5.343130 -2.339079 -0.417547  
 C 0 4.855611 -1.071043 -0.713233  
 C 0 -0.000393 2.103362 0.561090  
 C 0 -0.000748 3.262408 -0.221896

C 0 -0.001229 4.522578 0.373662  
 C 0 -0.001325 4.629018 1.760555  
 C 0 -0.000925 3.482396 2.554094  
 C 0 -0.000474 2.229348 1.952692  
 Cl 0 -0.000462 3.150769 -1.970869  
 H 0 -6.380971 -2.574192 -0.620506  
 H 0 -4.901019 -4.303650 0.354292  
 H 0 -2.524496 -3.805091 0.828380  
 H 0 -5.502572 -0.317869 -1.144351  
 H 0 2.525988 -3.804200 0.828787  
 H 0 4.902670 -4.301986 0.354546  
 H 0 6.381916 -2.572181 -0.620565  
 H 0 5.502708 -0.316219 -1.144686  
 H 0 -0.001507 5.406073 -0.251658  
 H 0 -0.001704 5.611071 2.219055  
 H 0 -0.000976 3.564204 3.634480  
 H 0 -0.000192 1.325751 2.551445

SCF Done: E(RB3LYP) = -  
 2555.39565431  
 Sum of electronic and zero-point  
 Energies= -2555.121374  
 Sum of electronic and thermal Energies=  
 -2555.099857  
 Sum of electronic and thermal  
 Enthalpies= -2555.098913  
 Sum of electronic and thermal Free  
 Energies= -2555.174121

6.1.2.2 Minimum geometry of native BBTT under IEFPCM variation of PCM  
(B3LYP/6-311++G\*\*, IEFPCM CH<sub>2</sub>Cl<sub>2</sub>)

Conformer I:  
 #p opt freq=noraman rb3lyp/6-311++g(d,p)  
 scrf=(iefpcm,solvent=dichloromethane)  
 pop=full

0 1  
 C 0 5.368391 -2.291041 -0.467288  
 C 0 4.522607 -3.279522 0.059079  
 C 0 3.181857 -3.014523 0.306162  
 C 0 2.664697 -1.740370 0.018613  
 C 0 3.531533 -0.759425 -0.518775

C 0 4.879135 -1.020687 -0.758978  
 C 0 1.335159 -1.227005 0.216055  
 C 0 1.194172 0.069297 -0.175273  
 S 0 2.686448 0.756701 -0.827380  
 S 0 -0.000016 -2.159532 0.954403  
 C 0 -1.335191 -1.226978 0.216086  
 C 0 -1.194187 0.069323 -0.175240  
 N 0 -0.000000 0.794289 -0.186506  
 C 0 -2.664731 -1.740331 0.018637

|                                          |           |           |           |      |           |           |           |  |
|------------------------------------------|-----------|-----------|-----------|------|-----------|-----------|-----------|--|
| C O                                      | -3.531558 | -0.759375 | -0.518747 | 0    | 1         |           |           |  |
| S O                                      | -2.686475 | 0.756767  | -0.827278 | C O  | 5.466905  | -2.128136 | 0.231661  |  |
| C O                                      | -3.181896 | -3.014490 | 0.306149  | C O  | 4.605675  | -3.232467 | 0.144104  |  |
| C O                                      | -4.522643 | -3.279484 | 0.059038  | C O  | 3.236176  | -3.060750 | -0.012358 |  |
| C O                                      | -5.368418 | -2.290992 | -0.467326 | C O  | 2.705378  | -1.760866 | -0.079466 |  |
| C O                                      | -4.879155 | -1.020632 | -0.758980 | C O  | 3.590742  | -0.661230 | 0.012671  |  |
| C O                                      | 0.000016  | 2.226264  | -0.219666 | C O  | 4.964723  | -0.830907 | 0.165597  |  |
| C O                                      | 0.000038  | 2.977310  | 0.964074  | C O  | 1.341202  | -1.339503 | -0.249609 |  |
| C O                                      | 0.000056  | 4.367700  | 0.923555  | C O  | 1.197459  | 0.015093  | -0.268224 |  |
| C O                                      | 0.000050  | 5.018514  | -0.308707 | S O  | 2.728894  | 0.871538  | -0.085380 |  |
| C O                                      | 0.000026  | 4.286314  | -1.493842 | S O  | -0.000011 | -2.499037 | -0.487577 |  |
| C O                                      | 0.000010  | 2.894774  | -1.446160 | C O  | -1.341216 | -1.339494 | -0.249603 |  |
| Cl O                                     | 0.000050  | 2.165457  | 2.517102  | C O  | -1.197465 | 0.015101  | -0.268220 |  |
| H O                                      | 6.412359  | -2.515975 | -0.651308 | N O  | -0.000000 | 0.727071  | -0.380048 |  |
| H O                                      | 4.922126  | -4.263122 | 0.277755  | C O  | -2.705396 | -1.760848 | -0.079460 |  |
| H O                                      | 2.535724  | -3.783511 | 0.714182  | C O  | -3.590752 | -0.661207 | 0.012675  |  |
| H O                                      | 5.530606  | -0.257231 | -1.167689 | S O  | -2.728895 | 0.871556  | -0.085376 |  |
| H O                                      | -2.535771 | -3.783489 | 0.714159  | C O  | -3.236201 | -3.060729 | -0.012350 |  |
| H O                                      | -4.922165 | -4.263088 | 0.277686  | C O  | -4.605701 | -3.232437 | 0.144114  |  |
| H O                                      | -6.412383 | -2.515920 | -0.651362 | C O  | -5.466925 | -2.128100 | 0.231669  |  |
| H O                                      | -5.530622 | -0.257165 | -1.167676 | C O  | -4.964735 | -0.830875 | 0.165602  |  |
| H O                                      | 0.000075  | 4.931615  | 1.847339  | C O  | 0.000005  | 2.156357  | -0.475065 |  |
| H O                                      | 0.000064  | 6.101688  | -0.336132 | C O  | 0.000020  | 2.967508  | 0.669418  |  |
| H O                                      | 0.000022  | 4.793178  | -2.450906 | C O  | 0.000027  | 4.354802  | 0.555084  |  |
| H O                                      | -0.000007 | 2.309413  | -2.357932 | C O  | 0.000019  | 4.939915  | -0.708614 |  |
| SCF Done: E(RB3LYP) = -                  |           |           |           | C O  | 0.000005  | 4.146576  | -1.854960 |  |
| 2555.40457940                            |           |           |           | C O  | -0.000001 | 2.760946  | -1.734579 |  |
| Sum of electronic and zero-point         |           |           |           | Cl O | 0.000033  | 2.244036  | 2.266383  |  |
| Energies= -2555.130308                   |           |           |           | H O  | 6.532592  | -2.282639 | 0.352721  |  |
| Sum of electronic and thermal Energies=  |           |           |           | H O  | 5.015205  | -4.234572 | 0.198906  |  |
| -2555.108750                             |           |           |           | H O  | 2.580377  | -3.921655 | -0.077350 |  |
| Sum of electronic and thermal            |           |           |           | H O  | 5.627493  | 0.023676  | 0.234584  |  |
| Enthalpies= -2555.107806                 |           |           |           | H O  | -2.580408 | -3.921638 | -0.077340 |  |
| Sum of electronic and thermal Free       |           |           |           | H O  | -5.015237 | -4.234540 | 0.198918  |  |
| Energies= -2555.183080                   |           |           |           | H O  | -6.532612 | -2.282597 | 0.352730  |  |
| Conformer II:                            |           |           |           | H O  | -5.627499 | 0.023712  | 0.234589  |  |
| #p opt freq=noraman rb3lyp/6-311++g(d,p) |           |           |           | H O  | 0.000038  | 4.965872  | 1.448288  |  |
| scr=(iefpcm,solvent=dichloro             |           |           |           |      |           |           |           |  |
| methane) pop=full                        |           |           |           |      |           |           |           |  |

|                                  |           |          |           |                                         |              |
|----------------------------------|-----------|----------|-----------|-----------------------------------------|--------------|
| H O                              | 0.000024  | 6.020200 | -0.792432 | Sum of electronic and thermal Energies= | -2555.107500 |
| H O                              | -0.000001 | 4.603244 | -2.836985 | Sum of electronic and thermal           |              |
| H O                              | -0.000012 | 2.125418 | -2.611988 | Enthalpies=                             | -2555.106556 |
| SCF Done: E(RB3LYP) = -          |           |          |           | Sum of electronic and thermal Free      |              |
| 2555.40320953                    |           |          |           | Energies=                               | -2555.182194 |
| Sum of electronic and zero-point |           |          |           |                                         |              |
| Energies=                        |           |          |           |                                         | -2555.129126 |

### 6.1.2.3 Minimum geometry of native BBTT under IEFPCM variation of PCM

(PBE1PBE/6-311++G\*\*, IEFPCM CH<sub>2</sub>Cl<sub>2</sub>)

|                                           |                                         |           |           |           |               |
|-------------------------------------------|-----------------------------------------|-----------|-----------|-----------|---------------|
| #p opt freq=noraman PBE1PBE/6-311++g(d,p) | C O                                     | 0.002106  | 4.364507  | 0.861251  |               |
| scrf=(iefpcm,solvent=dichloromethane)     | C O                                     | 0.001404  | 4.978612  | -0.385676 |               |
| pop=full geom=check guess=read            | C O                                     | 0.000263  | 4.217359  | -1.548531 |               |
| 0 1                                       | C O                                     | -0.000172 | 2.831152  | -1.463871 |               |
| C O                                       | Cl O                                    | 0.002358  | 2.207909  | 2.491298  |               |
| C O                                       | H O                                     | 6.401332  | -2.472033 | -0.649119 |               |
| C O                                       | H O                                     | 4.918544  | -4.252499 | 0.218571  |               |
| C O                                       | H O                                     | 2.526334  | -3.801898 | 0.650352  |               |
| C O                                       | H O                                     | 5.509576  | -0.207303 | -1.108237 |               |
| C O                                       | H O                                     | -2.528262 | -3.800536 | 0.650649  |               |
| C O                                       | H O                                     | -4.920987 | -4.249902 | 0.220284  |               |
| C O                                       | H O                                     | -6.403262 | -2.468682 | -0.646746 |               |
| S O                                       | H O                                     | -5.510529 | -0.204741 | -1.107188 |               |
| S O                                       | H O                                     | 0.002993  | 4.953414  | 1.770820  |               |
| C O                                       | H O                                     | 0.001771  | 6.061736  | -0.442827 |               |
| C O                                       | H O                                     | -0.000246 | 4.699404  | -2.519470 |               |
| N O                                       | H O                                     | -0.000942 | 2.218223  | -2.359120 |               |
| C O                                       | SCF Done: E(RPBE1PBE) = -               |           |           |           | 2553.73298211 |
| C O                                       | Sum of electronic and zero-point        |           |           |           | Energies=     |
| S O                                       | -2553.455862                            |           |           |           |               |
| C O                                       | Sum of electronic and thermal Energies= |           |           |           | -2553.434434  |
| C O                                       | Sum of electronic and thermal           |           |           |           |               |
| C O                                       | Enthalpies=                             |           |           |           | -2553.433490  |
| C O                                       | Sum of electronic and thermal Free      |           |           |           |               |
| C O                                       | Energies=                               |           |           |           | -2553.508870  |
| C O                                       |                                         |           |           |           |               |

### 6.1.2.4 TD-DFT calculation of ground state of native BBTT under IEFPCM variation of PCM

(PBE1PBE/6-311++G\*\*, IEFPCM CH<sub>2</sub>Cl<sub>2</sub>)

```

#p td=(singlets,nstates=24) PBE1PBE/6-311++g(d,p)
scrfl=(iefpcm,solvent=dichloromethane)
geom=check guess=read

<TDDFT> Excited State 1: Singlet-A
2.9958 eV 413.87 nm f=0.1274

<TDDFT>HOMO -> LUMO
94.9%

<TDDFT> Excited State 2: Singlet-A
3.3302 eV 372.31 nm f=0.0111

<TDDFT>HOMO -> LUMO+1
96.6%

<TDDFT> Excited State 3: Singlet-A
3.4939 eV 354.86 nm f=0.0009

<TDDFT>HOMO -> LUMO+2
93.2%

<TDDFT> Excited State 4: Singlet-A
3.8802 eV 319.53 nm f=0.0914

<TDDFT>HOMO -> LUMO+3
73.4%

<TDDFT>HOMO -> LUMO+4
12.0%

<TDDFT>HOMO -> LUMO+6 9.0%

<TDDFT> Excited State 5: Singlet-A
3.8941 eV 318.39 nm f=0.0203

<TDDFT>HOMO -> LUMO+2 2.9%

<TDDFT>HOMO -> LUMO+5
77.6%

<TDDFT>HOMO -> LUMO+7
13.1%

<TDDFT>HOMO -> LUMO+10 2.3%

<TDDFT> Excited State 6: Singlet-A
3.9120 eV 316.93 nm f=0.0043

<TDDFT>HOMO -> LUMO+3
13.8%

<TDDFT>HOMO -> LUMO+4
83.0%

<TDDFT> Excited State 7: Singlet-A
4.1032 eV 302.17 nm f=0.0058

<TDDFT>HOMO -> LUMO+5
17.1%

<TDDFT>HOMO -> LUMO+7
71.7%

<TDDFT>HOMO -> LUMO+10 5.9%

```

```

<TDDFT> Excited State 8: Singlet-A
4.1445 eV 299.15 nm f=0.0360

<TDDFT>HOMO -> LUMO+3 8.3%

<TDDFT>HOMO -> LUMO+4 2.1%

<TDDFT>HOMO -> LUMO+6
73.3%

<TDDFT>HOMO -> LUMO+8
11.6%

<TDDFT> Excited State 9: Singlet-A
4.4279 eV 280.01 nm f=0.0093

<TDDFT>HOMO -> LUMO+6 9.6%

<TDDFT>HOMO -> LUMO+8
73.1%

<TDDFT>HOMO -> LUMO+9 8.8%

<TDDFT>HOMO -> LUMO+14 2.5%

<TDDFT> Excited State 10: Singlet-A
4.5945 eV 269.85 nm f=0.1086

<TDDFT>HOMO-1 -> LUMO
87.2%

<TDDFT> Excited State 11: Singlet-A
4.6016 eV 269.44 nm f=0.1522

<TDDFT>HOMO-2 -> LUMO
79.7%

<TDDFT>HOMO-1 -> LUMO+4 2.1%

<TDDFT>HOMO -> LUMO+10 2.5%

<TDDFT>HOMO -> LUMO+13 5.4%

<TDDFT> Excited State 12: Singlet-A
4.6975 eV 263.94 nm f=0.0007

<TDDFT>HOMO-1 -> LUMO+1 2.7%

<TDDFT>HOMO -> LUMO+6 2.1%

<TDDFT>HOMO -> LUMO+8 6.6%

<TDDFT>HOMO -> LUMO+9
79.0%

<TDDFT>HOMO -> LUMO+12 2.7%

<TDDFT>HOMO -> LUMO+16 2.9%

<TDDFT> Excited State 13: Singlet-A
4.7900 eV 258.84 nm f=0.0148

<TDDFT>HOMO-2 -> LUMO+3 2.4%

<TDDFT>HOMO-1 -> LUMO+1
87.2%

<TDDFT>HOMO -> LUMO+9 2.9%

```

|                                                                     |                                                                     |
|---------------------------------------------------------------------|---------------------------------------------------------------------|
| <TDDFT> Excited State 14: Singlet-A<br>4.8362 eV 256.37 nm f=0.2281 | <TDDFT>HOMO-2 -> LUMO+2<br>15.4%                                    |
| <TDDFT>HOMO-2 -> LUMO 8.7%                                          | <TDDFT>HOMO-1 -> LUMO+3 2.9%                                        |
| <TDDFT>HOMO-2 -> LUMO+1 8.1%                                        | <TDDFT>HOMO -> LUMO+7 3.3%                                          |
| <TDDFT>HOMO -> LUMO+7 5.4%                                          | <TDDFT>HOMO -> LUMO+10<br>19.8%                                     |
| <TDDFT>HOMO -> LUMO+10<br>49.3%                                     | <TDDFT>HOMO -> LUMO+13<br>39.0%                                     |
| <TDDFT>HOMO -> LUMO+13<br>18.9%                                     | <TDDFT>HOMO -> LUMO+15<br>12.1%                                     |
| <TDDFT> Excited State 15: Singlet-A<br>4.8767 eV 254.24 nm f=0.0403 | <TDDFT> Excited State 20: Singlet-A<br>5.0709 eV 244.50 nm f=0.0708 |
| <TDDFT>HOMO-2 -> LUMO+1<br>80.0%                                    | <TDDFT>HOMO-5 -> LUMO+4 2.1%                                        |
| <TDDFT>HOMO-1 -> LUMO+4 2.6%                                        | <TDDFT>HOMO-3 -> LUMO<br>45.2%                                      |
| <TDDFT>HOMO -> LUMO+10 7.3%                                         | <TDDFT>HOMO-2 -> LUMO+3<br>10.2%                                    |
| <TDDFT> Excited State 16: Singlet-A<br>4.8992 eV 253.07 nm f=0.0010 | <TDDFT>HOMO-2 -> LUMO+4 3.2%                                        |
| <TDDFT>HOMO-3 -> LUMO 6.5%                                          | <TDDFT>HOMO-1 -> LUMO+1 2.9%                                        |
| <TDDFT>HOMO-1 -> LUMO 2.1%                                          | <TDDFT>HOMO-1 -> LUMO+2<br>11.4%                                    |
| <TDDFT>HOMO-1 -> LUMO+1 2.1%                                        | <TDDFT>HOMO-1 -> LUMO+5 8.8%                                        |
| <TDDFT>HOMO-1 -> LUMO+2<br>76.4%                                    | <TDDFT>HOMO-1 -> LUMO+7 4.0%                                        |
| <TDDFT>HOMO-1 -> LUMO+5 2.0%                                        | <TDDFT> Excited State 21: Singlet-A<br>5.1602 eV 240.27 nm f=0.0060 |
| <TDDFT>HOMO -> LUMO+11 3.7%                                         | <TDDFT>HOMO -> LUMO+8 4.9%                                          |
| <TDDFT> Excited State 17: Singlet-A<br>4.9168 eV 252.17 nm f=0.0060 | <TDDFT>HOMO -> LUMO+12<br>69.1%                                     |
| <TDDFT>HOMO-1 -> LUMO+2 3.9%                                        | <TDDFT>HOMO -> LUMO+14 9.9%                                         |
| <TDDFT>HOMO -> LUMO+11<br>88.7%                                     | <TDDFT>HOMO -> LUMO+16 5.8%                                         |
| <TDDFT>HOMO -> LUMO+18 2.1%                                         | <TDDFT> Excited State 22: Singlet-A<br>5.1621 eV 240.18 nm f=0.1090 |
| <TDDFT> Excited State 18: Singlet-A<br>5.0061 eV 247.67 nm f=0.0284 | <TDDFT>HOMO-5 -> LUMO 2.2%                                          |
| <TDDFT>HOMO-2 -> LUMO+2<br>70.1%                                    | <TDDFT>HOMO-2 -> LUMO+1 3.9%                                        |
| <TDDFT>HOMO-1 -> LUMO+3 2.3%                                        | <TDDFT>HOMO-2 -> LUMO+2 7.1%                                        |
| <TDDFT>HOMO-1 -> LUMO+6 2.3%                                        | <TDDFT>HOMO-2 -> LUMO+5 9.0%                                        |
| <TDDFT>HOMO -> LUMO+10 3.0%                                         | <TDDFT>HOMO-1 -> LUMO+3<br>51.1%                                    |
| <TDDFT>HOMO -> LUMO+13 9.2%                                         | <TDDFT>HOMO-1 -> LUMO+4<br>10.8%                                    |
| <TDDFT>HOMO -> LUMO+15 2.7%                                         | <TDDFT> Excited State 23: Singlet-A<br>5.2071 eV 238.10 nm f=0.0182 |
| <TDDFT> Excited State 19: Singlet-A<br>5.0231 eV 246.83 nm f=0.0679 |                                                                     |

|                         |      |                                     |      |
|-------------------------|------|-------------------------------------|------|
| <TDDFT>HOMO-6 -> LUMO+1 | 6.0% | <TDDFT>HOMO-2 -> LUMO+4             | 2.5% |
| <TDDFT>HOMO-6 -> LUMO+2 | 7.4% | <TDDFT>HOMO-2 -> LUMO+6             | 4.6% |
| <TDDFT>HOMO-4 -> LUMO   |      | <TDDFT>HOMO-1 -> LUMO+7             | 3.7% |
| 14.2%                   |      | <TDDFT> Excited State 24: Singlet-A |      |
| <TDDFT>HOMO-4 -> LUMO+1 | 9.8% | 5.2199 eV 237.52 nm f=0.0056        |      |
| <TDDFT>HOMO-4 -> LUMO+2 | 6.6% | <TDDFT>HOMO -> LUMO+9               | 3.4% |
| <TDDFT>HOMO-3 -> LUMO   | 5.7% | <TDDFT>HOMO -> LUMO+12              | 9.2% |
| <TDDFT>HOMO-3 -> LUMO+1 |      | <TDDFT>HOMO -> LUMO+14              |      |
| 13.6%                   |      | 76.4%                               |      |
| <TDDFT>HOMO-2 -> LUMO+3 |      |                                     |      |
| 14.5%                   |      |                                     |      |

#### 6.1.2.5 Minimum geometry of excited state of native BBTT under IEFPCM variation of PCM

(PBE1PBE/6-311++G\*\*, IEFPCM CH<sub>2</sub>Cl<sub>2</sub>)

```

#p opt td=(nstates=4) PBE1PBE/6-
311++g(d,p) freq
scrf=(iefpcm,solvent=dichloromethane)
geom=check guess=read
  0 1
C 0  5.474274 -2.111597 -0.060844
C 0  4.616530 -3.207427  0.063045
C 0  3.239803 -3.046797  0.061241
C 0  2.689026 -1.757454 -0.066771
C 0  3.577722 -0.660631 -0.192681
C 0  4.951873 -0.822876 -0.191633
C 0  1.329536 -1.342035 -0.097657
C 0  1.188155  0.057319 -0.257688
S 0  2.731693  0.881737 -0.342747
S 0  0.000624 -2.406177  0.130696
C 0 -1.328590 -1.342729 -0.099224
C 0 -1.187742  0.056528 -0.260700
N 0  0.000076  0.718591 -0.311930
C 0 -2.687927 -1.758618 -0.067544
C 0 -3.577041 -0.662281 -0.194525
S 0 -2.731607  0.880246 -0.346379
C 0 -3.238289 -3.047955  0.062402
C 0 -4.614977 -3.208922  0.065381
C 0 -5.473126 -2.113475 -0.059170
C 0 -4.951155 -0.824796 -0.192054
C 0 -0.000354  2.148359 -0.370332
C 0 -0.001244  2.901015  0.804871
C 0 -0.001725  4.287550  0.737736
C 0 -0.001383  4.913739 -0.503481
C 0 -0.000568  4.166110 -1.675513
C 0 -0.000039  2.779366 -1.609282
Cl 0 -0.001766  2.108986  2.342962
H 0  6.548859 -2.256801 -0.055866
H 0  5.033802 -4.204353  0.162396
H 0  2.589769 -3.910955  0.156922
H 0  5.611869  0.032748 -0.288147
H 0 -2.587988 -3.911813  0.158981
H 0 -5.031924 -4.205821  0.166359
H 0 -6.547663 -2.258990 -0.053128
H 0 -5.611351  0.030589 -0.289283
H 0 -0.002384  4.866599  1.653482
H 0 -0.001782  5.997280 -0.549087
H 0 -0.000297  4.659495 -2.640571
H 0  0.000654  2.171865 -2.507471
SCF Done: E(RPBE1PBE) = -
2553.72087118
Sum of electronic and zero-point
Energies= -2553.366158
Sum of electronic and thermal Energies=
-2553.343808
Sum of electronic and thermal
Enthalpies= -2553.342864

```



Sum of electronic and thermal Free  
Energies= -2553.420243

### 6.1.2.6 TD-DFT calculation of excited state of native BBTT under IEFPCM variation of PCM

(PBE1PBE/6-311++G\*\*, IEFPCM CH<sub>2</sub>Cl<sub>2</sub>)

|                                                                                                                    |                                                                    |
|--------------------------------------------------------------------------------------------------------------------|--------------------------------------------------------------------|
| #p opt td=(nstates=4) PBE1PBE/6-311++g(d,p) freq<br>scrf=(iefpcm,solvent=dichloromethane)<br>geom=check guess=read | <TDDFT> Excited State 3: Singlet-A<br>3.0225 eV 410.21 nm f=0.0022 |
| <TDDFT> Excited State 1: Singlet-A<br>2.2222 eV 557.93 nm f=0.1140                                                 | <TDDFT>HOMO -> LUMO+2<br>99.2%                                     |
| <TDDFT>HOMO -> LUMO<br>98.2%                                                                                       | <TDDFT> Excited State 4: Singlet-A<br>3.3964 eV 365.05 nm f=0.0002 |
| <TDDFT> Excited State 2: Singlet-A<br>2.7469 eV 451.36 nm f=0.0017                                                 | <TDDFT>HOMO -> LUMO+3 4.6%                                         |
| <TDDFT>HOMO -> LUMO+1<br>99.1%                                                                                     | <TDDFT>HOMO -> LUMO+5<br>38.2%                                     |
|                                                                                                                    | <TDDFT>HOMO -> LUMO+6<br>52.8%                                     |
|                                                                                                                    | <TDDFT>HOMO -> LUMO+8 2.2%                                         |

### 6.1.2.7 Minimum geometry of native BBTT under SMD variation of PCM (B3LYP/6-311++G\*\*, SMD CH<sub>2</sub>Cl<sub>2</sub>)

|                                                                                                          |                                   |
|----------------------------------------------------------------------------------------------------------|-----------------------------------|
| Conformer I:                                                                                             | S 0 -2.689640 0.754741 -0.853506  |
| #p opt freq=noraman rb3lyp/6-311++g(d,p)<br>pop=full<br>scrf=(SMD,solvent=dichloromethane)<br>geom=check | C 0 -3.184406 -3.006603 0.314184  |
| 0 1                                                                                                      | C 0 -4.527199 -3.270943 0.077463  |
| C 0 5.374878 -2.285176 -0.451029                                                                         | C 0 -5.374887 -2.285161 -0.451043 |
| C 0 4.527187 -3.270955 0.077475                                                                          | C 0 -4.885838 -1.017789 -0.756190 |
| C 0 3.184391 -3.006615 0.314184                                                                          | C 0 0.000005 2.231096 -0.222284   |
| C 0 2.667042 -1.735331 0.013573                                                                          | C 0 0.000019 2.956994 0.977332    |
| C 0 3.536131 -0.757841 -0.526324                                                                         | C 0 0.000024 4.347433 0.968860    |
| C 0 4.885831 -1.017806 -0.756188                                                                         | C 0 0.000015 5.024438 -0.249623   |
| C 0 1.336116 -1.220536 0.201375                                                                          | C 0 -0.000001 4.318296 -1.450425  |
| C 0 1.193865 0.072196 -0.200693                                                                          | C 0 -0.000006 2.925743 -1.434238  |
| S 0 2.689627 0.754714 -0.853555                                                                          | Cl 0 0.000030 2.108998 2.513986   |
| S 0 -0.000005 -2.147773 0.945807                                                                         | H 0 6.420666 -2.510068 -0.626436  |
| C 0 -1.336129 -1.220525 0.201393                                                                         | H 0 4.926775 -4.252377 0.307129   |
| C 0 -1.193873 0.072207 -0.200675                                                                         | H 0 2.538968 -3.775104 0.724821   |
| N 0 -0.000001 0.797261 -0.219510                                                                         | H 0 5.539906 -0.256989 -1.166739  |
| C 0 -2.667056 -1.735316 0.013587                                                                         | H 0 -2.538984 -3.775095 0.724818  |
| C 0 -3.536141 -0.757823 -0.526311                                                                        | H 0 -4.926788 -4.252367 0.307106  |
|                                                                                                          | H 0 -6.420674 -2.510052 -0.626456 |
|                                                                                                          | H 0 -5.539911 -0.256968 -1.166736 |

H O 0.000035 4.892827 1.904223  
H O 0.000019 6.108420 -0.253168  
H O -0.000009 4.846039 -2.396601  
H O -0.000019 2.361141 -2.359494

SCF Done: E(RB3LYP) = -  
2555.42875264

Sum of electronic and zero-point  
Energies= -2555.154571

Sum of electronic and thermal Energies=  
-2555.132997

Sum of electronic and thermal  
Enthalpies= -2555.132052

Sum of electronic and thermal Free  
Energies= -2555.207555

Conformer II:

#p opt=tight freq=noraman rb3lyp/6-  
311++g(d,p) pop=full  
scrf=(SMD,solvent=dichloromethane)  
geom=check

0 1

C O 5.460302 -2.165683 0.244814  
C O 4.598641 -3.261736 0.085809  
C O 3.231064 -3.079459 -0.075947  
C O 2.702380 -1.776785 -0.073938  
C O 3.588259 -0.686109 0.090817  
C O 4.960837 -0.865725 0.246999  
C O 1.341460 -1.342401 -0.242137  
C O 1.196989 0.011067 -0.187186  
S O 2.728273 0.851861 0.073235  
S O -0.000003 -2.481904 -0.562385  
C O -1.341464 -1.342399 -0.242132  
C O -1.196990 0.011069 -0.187180  
N O -0.000000 0.728034 -0.254509  
C O -2.702384 -1.776781 -0.073933  
C O -3.588262 -0.686103 0.090821

#### 6.1.2.8 Minimum geometry of radical cation of BBTT in gas phase (B3LYP/6-311++G\*\*)

#p ub3lyp/6-311++g(d,p) opt  
freq=noraman scf=maxcycle=1000

0 1

C O 5.479722 -2.105191 -0.040648

S O -2.728272 0.851864 0.073247  
C O -3.231071 -3.079453 -0.075946  
C O -4.598649 -3.261729 0.085807  
C O -5.460307 -2.165674 0.244812  
C O -4.960840 -0.865717 0.247000

C O 0.000000 2.143467 -0.485765  
C O 0.000006 3.056297 0.578520  
C O 0.000006 4.427755 0.338226  
C O 0.000001 4.893151 -0.974083  
C O -0.000004 3.997446 -2.042860  
C O -0.000004 2.628916 -1.796123

Cl O 0.000014 2.483146 2.238906  
H O 6.524710 -2.328814 0.368438  
H O 5.006444 -4.266299 0.087833  
H O 2.577459 -3.936179 -0.198178  
H O 5.624893 -0.017917 0.370967  
H O -2.577467 -3.936175 -0.198177

H O -5.006454 -4.266291 0.087830  
H O -6.524716 -2.328803 0.368435  
H O -5.624895 -0.017907 0.370969  
H O 0.000011 5.120025 1.170848  
H O 0.000002 5.961449 -1.157326  
H O -0.000008 4.361993 -3.063117  
H O -0.000009 1.915578 -2.612270

SCF Done: E(RB3LYP) = -  
2555.42722522

Sum of electronic and zero-point  
Energies= -2555.153119

Sum of electronic and thermal Energies=  
-2555.131544

Sum of electronic and thermal  
Enthalpies= -2555.130600

Sum of electronic and thermal Free  
Energies= -2555.205987

C O 4.626378 -3.213435 0.076765  
C O 3.250697 -3.053916 0.069085  
C O 2.712099 -1.761530 -0.057495  
C O 3.588153 -0.659118 -0.174534

|      |           |           |           |                                           |           |           |           |
|------|-----------|-----------|-----------|-------------------------------------------|-----------|-----------|-----------|
| C O  | 4.970225  | -0.817028 | -0.168487 | H O                                       | 6.552857  | -2.252487 | -0.032125 |
| C O  | 1.338127  | -1.343630 | -0.088594 | H O                                       | 5.050242  | -4.205141 | 0.174870  |
| C O  | 1.195243  | 0.030005  | -0.224928 | H O                                       | 2.601126  | -3.917010 | 0.160237  |
| S O  | 2.722934  | 0.873426  | -0.325489 | H O                                       | 5.633720  | 0.034233  | -0.258819 |
| S O  | 0.000362  | -2.455598 | 0.044800  | H O                                       | -2.600130 | -3.917573 | 0.159734  |
| C O  | -1.337607 | -1.343885 | -0.088396 | H O                                       | -5.049174 | -4.206251 | 0.173119  |
| C O  | -1.195016 | 0.029869  | -0.224595 | H O                                       | -6.552140 | -2.253822 | -0.033582 |
| N O  | 0.000026  | 0.710598  | -0.281614 | H O                                       | -5.633414 | 0.033163  | -0.259112 |
| C O  | -2.711452 | -1.762077 | -0.057690 | H O                                       | -0.002069 | 4.922938  | 1.587605  |
| C O  | -3.587721 | -0.659818 | -0.174796 | H O                                       | -0.000426 | 6.002368  | -0.641920 |
| S O  | -2.722796 | 0.872832  | -0.325405 | H O                                       | 0.001639  | 4.616828  | -2.704249 |
| C O  | -3.249842 | -3.054602 | 0.068430  | H O                                       | 0.001800  | 2.137305  | -2.519125 |
| C O  | -4.625492 | -3.214414 | 0.075554  | SCF Done: E(UB3LYP) = -                   |           |           |           |
| C O  | -5.479031 | -2.106316 | -0.041775 | 2555.17610176                             |           |           |           |
| C O  | -4.969758 | -0.818004 | -0.169067 | Sum of electronic and zero-point          |           |           |           |
| C O  | -0.000041 | 2.156074  | -0.373402 | Energies= -2554.901124                    |           |           |           |
| C O  | -0.001118 | 2.935099  | 0.790383  | Sum of electronic and thermal Energies=   |           |           |           |
| C O  | -0.001251 | 4.323050  | 0.686738  | -2554.879707                              |           |           |           |
| C O  | -0.000295 | 4.921292  | -0.570771 | Sum of electronic and thermal Enthalpies= |           |           |           |
| C O  | 0.000829  | 4.145829  | -1.729380 | -2554.878763                              |           |           |           |
| C O  | 0.000947  | 2.758840  | -1.631419 | Sum of electronic and thermal Free        |           |           |           |
| Cl O | -0.002058 | 2.179891  | 2.362136  | Energies= -2554.953507                    |           |           |           |

### 6.1.2.9 Minimum geometry of radical cation of BBTT under IEFPCM variation of PCM

(B3LYP/6-311++G\*\*, IEFPCM CH<sub>2</sub>Cl<sub>2</sub>)

```
#p ub3lyp/6-311++g(d,p) opt
freq=noraman scf=maxcycle=1000
scrf=(iefpcm,solvent=dichloromethane)
geom=check guess=read
0 1
```

|     |          |           |           |     |           |           |           |
|-----|----------|-----------|-----------|-----|-----------|-----------|-----------|
| C O | 5.479089 | -2.104741 | -0.035606 | S O | 0.000007  | -2.457628 | 0.038293  |
| C O | 4.625330 | -3.213516 | 0.076884  | C O | -1.335407 | -1.345441 | -0.090420 |
| C O | 3.248773 | -3.054396 | 0.066480  | C O | -1.193829 | 0.027787  | -0.223678 |
| C O | 2.710624 | -1.761884 | -0.058552 | N O | 0.000003  | 0.708685  | -0.274655 |
| C O | 3.586183 | -0.658884 | -0.171539 | C O | -2.710612 | -1.761892 | -0.058553 |
| C O | 4.969077 | -0.816334 | -0.161825 | C O | -3.586175 | -0.658899 | -0.171579 |
| C O | 1.335419 | -1.345436 | -0.090425 | S O | -2.720921 | 0.872789  | -0.322507 |
| C O | 1.193837 | 0.027793  | -0.223657 | C O | -3.248756 | -3.054401 | 0.066525  |
| S O | 2.720925 | 0.872801  | -0.322436 | C O | -4.625312 | -3.213529 | 0.076929  |
|     |          |           |           | C O | -5.479075 | -2.104762 | -0.035609 |
|     |          |           |           | C O | -4.969068 | -0.816357 | -0.161872 |
|     |          |           |           | C O | -0.000001 | 2.153171  | -0.372797 |
|     |          |           |           | C O | -0.000028 | 2.939512  | 0.785526  |

C O -0.000028 4.326168 0.677246  
 C O 0.000003 4.917936 -0.583791  
 C O 0.000031 4.136102 -1.737754  
 C O 0.000029 2.749301 -1.633368  
 Cl O -0.000054 2.191181 2.365014  
 H O 6.552326 -2.251123 -0.024563  
 H O 5.048356 -4.205803 0.173494  
 H O 2.598836 -3.917106 0.154235  
 H O 5.631231 0.036046 -0.248112  
 H O -2.598814 -3.917105 0.154311  
 H O -5.048334 -4.205813 0.173582  
 H O -6.552312 -2.251149 -0.024572  
 H O -5.631226 0.036015 -0.248207

H O -0.000052 4.931950 1.573764  
 H O 0.000005 5.998473 -0.659714  
 H O 0.000057 4.601072 -2.715279  
 H O 0.000043 2.122519 -2.516608

SCF Done: E(UB3LYP) = -2555.22690753

Sum of electronic and zero-point Energies= -2554.951820

Sum of electronic and thermal Energies= -2554.930417

Sum of electronic and thermal Enthalpies= -2554.929473

Sum of electronic and thermal Free Energies= -2555.004239

### 6.1.2.10 Minimum geometry of radical cation of BBTT under SMD variation of PCM

(B3LYP/6-311++G\*\*, SMD CH<sub>2</sub>Cl<sub>2</sub>)

#p ub3lyp/6-311++g(d,p) opt  
 freq=noraman scf=maxcycle=1000  
 scrf=(SMD,solvent=dichloromethane)

0 1

C O 5.478027 -2.116560 -0.037422  
 C O 4.622237 -3.225698 0.054023  
 C O 3.245937 -3.064510 0.047720  
 C O 2.711161 -1.768146 -0.051655  
 C O 3.589164 -0.665460 -0.145974  
 C O 4.971548 -0.824267 -0.139702  
 C O 1.337419 -1.348613 -0.076554  
 C O 1.193750 0.025985 -0.187661  
 S O 2.723934 0.870796 -0.272684  
 S O 0.001204 -2.464776 0.025665  
 C O -1.335636 -1.349437 -0.077042  
 C O -1.192787 0.025237 -0.188389  
 N O 0.000249 0.707533 -0.229650  
 C O -2.709101 -1.769885 -0.052973  
 C O -3.587806 -0.667846 -0.148226  
 S O -2.723506 0.868970 -0.274958  
 C O -3.243003 -3.066581 0.046624  
 C O -4.619197 -3.228742 0.052239

C O -5.475706 -2.120238 -0.040071  
 C O -4.970079 -0.827622 -0.142589  
 C O -0.000083 2.148953 -0.373581  
 C O -0.003593 2.977607 0.754593  
 C O -0.003476 4.359232 0.596327  
 C O 0.000090 4.903168 -0.686314  
 C O 0.003417 4.079442 -1.810732  
 C O 0.003333 2.697577 -1.655799  
 Cl O -0.008123 2.286493 2.363560  
 H O 6.551212 -2.265828 -0.029439  
 H O 5.043701 -4.220718 0.131003  
 H O 2.595511 -3.929047 0.118215  
 H O 5.637419 0.027416 -0.210318  
 H O -2.591969 -3.930604 0.117846  
 H O -5.040005 -4.224026 0.129388  
 H O -6.548794 -2.270244 -0.032523  
 H O -5.636527 0.023559 -0.213822  
 H O -0.006090 5.000325 1.468502  
 H O 0.000182 5.980477 -0.801959  
 H O 0.006093 4.508298 -2.805044  
 H O 0.005807 2.035872 -2.514236

SCF Done: E(UB3LYP) = -  
2555.25437005

Sum of electronic and thermal  
Enthalpies= -2554.957212

Sum of electronic and zero-point  
Energies= -2554.979639

Sum of electronic and thermal Free  
Energies= -2555.032875

Sum of electronic and thermal Energies=  
-2554.958156

#### 6.1.2.11 Transition state of native BBTT under IEFPCM variation of PCM (B3LYP/6-311++G\*\*, IEFPCM CH<sub>2</sub>Cl<sub>2</sub>)

IEFPCM CH<sub>2</sub>Cl<sub>2</sub>

#p opt=(ts,noeigen,calcfc) freq=noraman  
B3LYP/6-311++g(d,p) pop=full  
scrf=(iefpcm,solvent=dichloromethane)

0 1

C 0 5.490838 -2.106465 0.111008

C 0 4.627507 -3.212328 0.128910

C 0 3.251226 -3.046800 0.038694

C 0 2.716189 -1.751379 -0.069985

C 0 3.604040 -0.650137 -0.085752

C 0 4.984253 -0.813655 0.002976

C 0 1.343508 -1.338034 -0.180375

C 0 1.197623 0.013561 -0.266373

S 0 2.735814 0.875738 -0.225550

S 0 -0.000058 -2.517728 -0.244528

C 0 -1.343567 -1.338032 -0.179449

C 0 -1.197806 0.013526 -0.266272

N 0 -0.000137 0.725834 -0.370502

C 0 -2.716278 -1.751456 -0.069593

C 0 -3.604208 -0.650290 -0.085988

S 0 -2.736078 0.875616 -0.226099

C 0 -3.251193 -3.046832 0.040194

C 0 -4.627437 -3.212383 0.130964

C 0 -5.490837 -2.106582 0.112638

C 0 -4.984360 -0.813808 0.003656

C 0 -0.000276 2.156826 -0.428891

C 0 0.001178 2.937320 0.736685

C 0 0.001258 4.326799 0.659949

C 0 -0.000721 4.945349 -0.588058

C 0 -0.002757 4.183089 -1.755036

C 0 -0.002453 2.794406 -1.671986

Cl 0 0.002223 2.168436 2.311694

H 0 6.561717 -2.256081 0.181958

H 0 5.040547 -4.210816 0.214581

H 0 2.594564 -3.909387 0.055115

H 0 5.648950 0.042109 -0.010040

H 0 -2.594458 -3.909352 0.057185

H 0 -5.040414 -4.210859 0.217060

H 0 -6.561649 -2.256180 0.184616

H 0 -5.649110 0.041910 -0.009717

H 0 0.002688 4.914005 1.569017

H 0 -0.000688 6.027488 -0.643070

H 0 -0.004541 4.665951 -2.724436

H 0 -0.003643 2.182783 -2.566207

SCF Done: E(RB3LYP) = -  
2555.40319694

Sum of electronic and zero-point  
Energies= -2555.129172

Sum of electronic and thermal Energies=  
-2555.108436

Sum of electronic and thermal  
Enthalpies= -2555.107492

Sum of electronic and thermal Free  
Energies= -2555.179648

### 6.1.3 *anti-anti-N-ortho*-fluorophenyl-BBTT 3c

#### 6.1.3.1 Minimum geometry of native BBTT in gas phase (B3LYP/6-311++G\*\*)

Conformer I:

#p opt freq=noraman rb3lyp/6-311++g(d,p)  
pop=full

0 1  
 C 0 -5.361320 -2.209131 -0.426750  
 C 0 -4.514914 -3.190762 0.109152  
 C 0 -3.176358 -2.920206 0.356879  
 C 0 -2.661897 -1.647837 0.061565  
 C 0 -3.528327 -0.674015 -0.487570  
 C 0 -4.874379 -0.941056 -0.727440  
 C 0 -1.334256 -1.129962 0.262053  
 C 0 -1.195061 0.162418 -0.137961  
 S 0 -2.685759 0.839730 -0.806708  
 S 0 0.000139 -2.057843 1.002391  
 C 0 1.334469 -1.129789 0.262266  
 C 0 1.195186 0.162563 -0.137825  
 N 0 0.000016 0.889554 -0.165036  
 C 0 2.662156 -1.647565 0.061775  
 C 0 3.528509 -0.673664 -0.487355  
 S 0 2.685866 0.839946 -0.806536  
 C 0 3.176699 -2.919899 0.357112  
 C 0 4.515275 -3.190358 0.109435  
 C 0 5.361627 -2.208642 -0.426441  
 C 0 4.874599 -0.940620 -0.727166  
 C 0 -0.000090 2.314324 -0.028727  
 C 0 0.000494 3.146091 -1.149757  
 C 0 0.000433 4.531313 -1.002718  
 C 0 -0.000238 5.094045 0.272303  
 C 0 -0.000853 4.280521 1.403826  
 C 0 -0.000769 2.905315 1.237130  
 F 0 -0.001277 2.113223 2.325008  
 H 0 -6.404256 -2.438416 -0.611733  
 H 0 -4.912503 -4.173741 0.334117  
 H 0 -2.527062 -3.683649 0.770064  
 H 0 -5.526697 -0.182518 -1.144390  
 H 0 2.527408 -3.683392 0.770218  
 H 0 4.912939 -4.173317 0.334349  
 H 0 6.404591 -2.437835 -0.611358  
 H 0 5.526875 -0.182054 -1.144131  
 H 0 0.000985 2.690183 -2.132858

H 0 0.000898 5.167026 -1.879657  
 H 0 -0.000291 6.171201 0.391290  
 H 0 -0.001371 4.692802 2.405214

SCF Done: E(RB3LYP) = -  
 2195.04217983

Sum of electronic and zero-point  
 Energies= -2194.766456

Sum of electronic and thermal Energies=  
 -2194.745222

Sum of electronic and thermal  
 Enthalpies= -2194.744278

Sum of electronic and thermal Free  
 Energies= -2194.819882

Conformer II:

#p opt freq=noraman rb3lyp/6-311++g(d,p)  
 pop=full

0 1

C 0 -5.336186 -2.242141 -0.432492  
 C 0 -4.495316 -3.227174 0.106790  
 C 0 -3.164220 -2.952175 0.386297  
 C 0 -2.652327 -1.672190 0.121289  
 C 0 -3.512088 -0.694488 -0.432246  
 C 0 -4.851443 -0.967307 -0.704700  
 C 0 -1.334077 -1.146646 0.360047  
 C 0 -1.193568 0.153121 -0.016559  
 S 0 -2.670626 0.824830 -0.719811  
 S 0 0.000063 -2.069551 1.107142  
 C 0 1.334044 -1.146696 0.359909  
 C 0 1.193596 0.153115 -0.016652  
 N 0 0.000001 0.885688 0.006953  
 C 0 2.652335 -1.672178 0.121248  
 C 0 3.512127 -0.694361 -0.432080  
 S 0 2.670632 0.824835 -0.719686  
 C 0 3.164203 -2.952232 0.385983  
 C 0 4.495335 -3.227168 0.106587  
 C 0 5.336221 -2.242040 -0.432474  
 C 0 4.851497 -0.967168 -0.704520  
 C 0 -0.000038 2.274394 0.365802  
 C 0 -0.000043 3.263981 -0.617522

|     |           |           |           |                                         |           |          |           |
|-----|-----------|-----------|-----------|-----------------------------------------|-----------|----------|-----------|
| C 0 | -0.000050 | 4.614514  | -0.300127 | H 0                                     | -0.000112 | 5.344924 | -1.099474 |
| C 0 | -0.000051 | 4.989639  | 1.040131  | H 0                                     | -0.000012 | 6.041931 | 1.299073  |
| C 0 | -0.000036 | 4.020815  | 2.044104  | H 0                                     | -0.000056 | 4.315843 | 3.086436  |
| C 0 | -0.000021 | 2.671878  | 1.705239  | H 0                                     | 0.000019  | 1.904729 | 2.470722  |
| F 0 | -0.000046 | 2.902038  | -1.916603 | SCF Done: E(RB3LYP) = -                 |           |          |           |
| H 0 | -6.373365 | -2.475142 | -0.643480 | 2195.04162850                           |           |          |           |
| H 0 | -4.891349 | -4.215930 | 0.307811  | Sum of electronic and zero-point        |           |          |           |
| H 0 | -2.518096 | -3.717932 | 0.800321  | Energies= -2194.765903                  |           |          |           |
| H 0 | -5.499341 | -0.207264 | -1.125702 | Sum of electronic and thermal Energies= |           |          |           |
| H 0 | 2.518032  | -3.718086 | 0.799753  | -2194.744701                            |           |          |           |
| H 0 | 4.891359  | -4.215958 | 0.307471  | Sum of electronic and thermal           |           |          |           |
| H 0 | 6.373445  | -2.475000 | -0.643433 | Enthalpies= -2194.743757                |           |          |           |
| H 0 | 5.499421  | -0.207075 | -1.125396 | Sum of electronic and thermal Free      |           |          |           |
|     |           |           |           | Energies= -2194.818576                  |           |          |           |

### 6.1.3.2 Minimum geometry of native BTT under IEFPCM variation of PCM

(B3LYP/6-311++G\*\*, IEFPCM CH<sub>2</sub>Cl<sub>2</sub>)

|                                          |           |           |           |           |           |           |           |
|------------------------------------------|-----------|-----------|-----------|-----------|-----------|-----------|-----------|
| Conformer I:                             | C 0       | 4.519960  | -3.200569 | 0.064925  |           |           |           |
| #p opt freq=noraman rb3lyp/6-311++g(d,p) | C 0       | 5.365391  | -2.203144 | -0.444861 |           |           |           |
| scrf=(iefpcm,solvent=dichloromethane)    | C 0       | 4.876802  | -0.927157 | -0.711789 |           |           |           |
| pop=full geom=check guess=read           | C 0       | 0.000015  | 2.311412  | -0.022993 |           |           |           |
| 0 1                                      | C 0       | -0.000047 | 3.098596  | -1.176337 |           |           |           |
| C 0                                      | -5.365459 | -2.203036 | -0.444795 | C 0       | -0.000033 | 4.488576  | -1.079481 |
| C 0                                      | -4.520041 | -3.200478 | 0.064977  | C 0       | 0.000063  | 5.099131  | 0.173955  |
| C 0                                      | -3.180083 | -2.938886 | 0.319714  | C 0       | 0.000128  | 4.329424  | 1.336756  |
| C 0                                      | -2.663604 | -1.659227 | 0.056967  | C 0       | 0.000094  | 2.950283  | 1.218729  |
| C 0                                      | -3.529764 | -0.669138 | -0.464539 | F 0       | 0.000178  | 2.193330  | 2.338489  |
| C 0                                      | -4.876847 | -0.927061 | -0.711735 | H 0       | -6.408815 | -2.425405 | -0.635314 |
| C 0                                      | -1.335280 | -1.147792 | 0.268809  | H 0       | -4.919167 | -4.188291 | 0.264475  |
| C 0                                      | -1.194342 | 0.155682  | -0.096990 | H 0       | -2.534148 | -3.714681 | 0.714974  |
| S 0                                      | -2.685356 | 0.853221  | -0.742341 | H 0       | -5.528193 | -0.156729 | -1.107529 |
| S 0                                      | -0.000026 | -2.092771 | 0.990581  | H 0       | 2.534067  | -3.714728 | 0.714957  |
| C 0                                      | 1.335248  | -1.147812 | 0.268820  | H 0       | 4.919068  | -4.188392 | 0.264412  |
| C 0                                      | 1.194330  | 0.155663  | -0.096980 | H 0       | 6.408738  | -2.425536 | -0.635398 |
| N 0                                      | -0.000000 | 0.881208  | -0.096573 | H 0       | 5.528160  | -0.156838 | -1.107588 |
| C 0                                      | 2.663559  | -1.659274 | 0.056957  | H 0       | -0.000106 | 2.609498  | -2.143211 |
| C 0                                      | 3.529730  | -0.669203 | -0.464564 | H 0       | -0.000084 | 5.091022  | -1.979317 |
| S 0                                      | 2.685355  | 0.853181  | -0.742328 | H 0       | 0.000082  | 6.179695  | 0.252484  |
| C 0                                      | 3.180013  | -2.938947 | 0.319689  | H 0       | 0.000202  | 4.781602  | 2.320670  |

SCF Done: E(RB3LYP) = -  
2195.05044264

Sum of electronic and zero-point  
Energies= -2194.774789

Sum of electronic and thermal Energies=  
-2194.753578

Sum of electronic and thermal  
Enthalpies= -2194.752634

Sum of electronic and thermal Free  
Energies= -2194.827334

Conformer II:

#p opt freq=noraman rb3lyp/6-311++g(d,p)  
scrf=(iefpcm,solvent=dichloromethane)  
pop=full

0 1

C 0 -5.381580 -2.127887 -0.464472  
C 0 -4.532791 -3.200593 -0.150835  
C 0 -3.188269 -2.990680 0.126856  
C 0 -2.669455 -1.685353 0.086749  
C 0 -3.540514 -0.618252 -0.237242  
C 0 -4.891354 -0.825532 -0.508384  
C 0 -1.334619 -1.221949 0.356306  
C 0 -1.194668 0.125761 0.217562  
S 0 -2.695346 0.928129 -0.251836  
S 0 0.000003 -2.280673 0.899606  
C 0 1.334623 -1.221947 0.356303  
C 0 1.194668 0.125763 0.217558  
N 0 0.000000 0.842327 0.347524  
C 0 2.669460 -1.685347 0.086746  
C 0 3.540516 -0.618245 -0.237248  
S 0 2.695343 0.928133 -0.251851  
C 0 3.188278 -2.990672 0.126859  
C 0 4.532801 -3.200583 -0.150830

### 6.1.3.3 Minimum geometry of native BBTT under IEFPCM variation of PCM

(PBE1PBE/6-311++G\*\*, IEFPCM CH<sub>2</sub>Cl<sub>2</sub>)

#p opt freq=noraman PBE1PBE/6-  
311++g(d,p)  
scrf=(iefpcm,solvent=dichloromethane)  
pop=full geom=check guess=read

0 1

C 0 5.381587 -2.127875 -0.464470  
C 0 4.891357 -0.825521 -0.508386  
C 0 -0.000001 2.274092 0.380684  
C 0 -0.000009 3.018814 -0.801079  
C 0 -0.000012 4.404245 -0.797786  
C 0 -0.000005 5.069455 0.426142  
C 0 0.000003 4.351095 1.622462  
C 0 0.000004 2.959730 1.597594  
F 0 -0.000018 2.366246 -1.985764  
H 0 -6.428167 -2.311733 -0.676867  
H 0 -4.932795 -4.207664 -0.123843  
H 0 -2.540385 -3.825831 0.367867  
H 0 -5.544405 0.003912 -0.753131  
H 0 2.540397 -3.825825 0.367872  
H 0 4.932808 -4.207652 -0.123835  
H 0 6.428175 -2.311718 -0.676863  
H 0 5.544406 0.003924 -0.753136  
H 0 -0.000019 4.939255 -1.739110  
H 0 -0.000007 6.152716 0.441929  
H 0 0.000007 4.872919 2.571362  
H 0 0.000010 2.384659 2.515726

SCF Done: E(RB3LYP) = -  
2195.04973792

Sum of electronic and zero-point  
Energies= -2194.774113

Sum of electronic and thermal Energies=  
-2194.752935

Sum of electronic and thermal  
Enthalpies= -2194.751991

Sum of electronic and thermal Free  
Energies= -2194.825902

C 0 -5.338978 -2.173201 -0.489668  
C 0 -4.501597 -3.198366 -0.033393  
C 0 -3.165613 -2.958279 0.241106  
C 0 -2.645767 -1.671187 0.052022



|     |           |           |           |                                         |           |           |           |
|-----|-----------|-----------|-----------|-----------------------------------------|-----------|-----------|-----------|
| C 0 | -3.503130 | -0.652317 | -0.414380 | F 0                                     | -0.000012 | 2.372507  | 2.346485  |
| C 0 | -4.846925 | -0.889772 | -0.682713 | H 0                                     | -6.383137 | -2.381055 | -0.697145 |
| C 0 | -1.321867 | -1.178509 | 0.293816  | H 0                                     | -4.906051 | -4.194994 | 0.108960  |
| C 0 | -1.185834 | 0.141445  | -0.002632 | H 0                                     | -2.522021 | -3.757177 | 0.595707  |
| S 0 | -2.660073 | 0.867846  | -0.602716 | H 0                                     | -5.493426 | -0.094781 | -1.038595 |
| S 0 | 0.000003  | -2.143756 | 0.974491  | H 0                                     | 2.522030  | -3.757172 | 0.595708  |
| C 0 | 1.321870  | -1.178507 | 0.293814  | H 0                                     | 4.906061  | -4.194983 | 0.108965  |
| C 0 | 1.185835  | 0.141447  | -0.002633 | H 0                                     | 6.383144  | -2.381042 | -0.697138 |
| N 0 | -0.000000 | 0.863277  | 0.051588  | H 0                                     | 5.493428  | -0.094770 | -1.038591 |
| C 0 | 2.645771  | -1.671182 | 0.052022  | H 0                                     | 0.000003  | 2.389938  | -2.139543 |
| C 0 | 3.503133  | -0.652310 | -0.414379 | H 0                                     | -0.000000 | 4.875546  | -2.193828 |
| S 0 | 2.660072  | 0.867850  | -0.602719 | H 0                                     | -0.000011 | 6.152173  | -0.066805 |
| C 0 | 3.165620  | -2.958273 | 0.241107  | H 0                                     | -0.000014 | 4.942945  | 2.112931  |
| C 0 | 4.501605  | -3.198357 | -0.033390 | SCF Done: E(RPBE1PBE) = -               |           |           |           |
| C 0 | 5.338985  | -2.173190 | -0.489663 | 2193.44821361                           |           |           |           |
| C 0 | 4.846929  | -0.889762 | -0.682709 | Sum of electronic and zero-point        |           |           |           |
| C 0 | -0.000001 | 2.284160  | -0.002873 | Energies= -2193.169676                  |           |           |           |
| C 0 | -0.000000 | 2.964185  | -1.218941 | Sum of electronic and thermal Energies= |           |           |           |
| C 0 | -0.000002 | 4.353144  | -1.244154 | -2193.148601                            |           |           |           |
| C 0 | -0.000008 | 5.067756  | -0.050818 | Sum of electronic and thermal           |           |           |           |
| C 0 | -0.000009 | 4.405479  | 1.171654  | Enthalpies= -2193.147657                |           |           |           |
| C 0 | -0.000004 | 3.023736  | 1.177639  | Sum of electronic and thermal Free      |           |           |           |
|     |           |           |           | Energies= -2193.222197                  |           |           |           |

#### 6.1.3.4 TD-DFT calculation of ground state of native BBTT under IEFPCM variation of PCM

(PBE1PBE/6-311++G\*\*, IEFPCM CH<sub>2</sub>Cl<sub>2</sub>)

#p td=(singlets,nstates=24) PBE1PBE/6-311++g(d,p) scrf=(iefpcm,solvent=dichloromethane) geom=check guess=read

<TDDFT> Excited State 1: Singlet-A  
3.0343 eV 408.61 nm f=0.1315

<TDDFT>HOMO -> LUMO  
94.7%

<TDDFT> Excited State 2: Singlet-A  
3.4053 eV 364.09 nm f=0.0087

<TDDFT>HOMO -> LUMO+1  
97.2%

<TDDFT> Excited State 3: Singlet-A  
3.6700 eV 337.84 nm f=0.0027

<TDDFT>HOMO -> LUMO+2  
90.1%

<TDDFT>HOMO -> LUMO+7 4.3%

<TDDFT> Excited State 4: Singlet-A  
3.8980 eV 318.07 nm f=0.0971

<TDDFT>HOMO -> LUMO+3  
75.3%

<TDDFT>HOMO -> LUMO+4  
10.8%

<TDDFT>HOMO -> LUMO+6 8.3%

<TDDFT> Excited State 5: Singlet-A  
3.9319 eV 315.33 nm f=0.0036

<TDDFT>HOMO -> LUMO+3  
12.3%

<TDDFT>HOMO -> LUMO+4  
84.4%

|                                                                     |                                                                     |       |
|---------------------------------------------------------------------|---------------------------------------------------------------------|-------|
| <TDDFT> Excited State 6: Singlet-A<br>3.9835 eV 311.24 nm f=0.0150  | <TDDFT>HOMO-1 -> LUMO+1                                             | 6.9%  |
| <TDDFT>HOMO -> LUMO+2                                               | <TDDFT>HOMO -> LUMO+8                                               | 3.5%  |
| <TDDFT>HOMO -> LUMO+5                                               | <TDDFT>HOMO -> LUMO+9                                               | 74.8% |
| 86.2%                                                               | <TDDFT>HOMO -> LUMO+11                                              | 6.0%  |
| <TDDFT>HOMO -> LUMO+7                                               | <TDDFT> Excited State 13: Singlet-A<br>4.8298 eV 256.71 nm f=0.0181 |       |
| <TDDFT> Excited State 7: Singlet-A<br>4.1448 eV 299.13 nm f=0.0122  | <TDDFT>HOMO-3 -> LUMO                                               | 3.3%  |
| <TDDFT>HOMO -> LUMO+2                                               | <TDDFT>HOMO-2 -> LUMO+3                                             | 2.7%  |
| <TDDFT>HOMO -> LUMO+5                                               | <TDDFT>HOMO-1 -> LUMO+1                                             | 80.2% |
| <TDDFT>HOMO -> LUMO+7                                               | <TDDFT>HOMO -> LUMO+9                                               | 8.0%  |
| 76.3%                                                               | <TDDFT> Excited State 14: Singlet-A<br>4.8663 eV 254.78 nm f=0.2585 |       |
| <TDDFT>HOMO -> LUMO+10                                              | <TDDFT>HOMO-2 -> LUMO                                               | 7.1%  |
| 7.1%                                                                | <TDDFT>HOMO -> LUMO+7                                               | 6.0%  |
| <TDDFT> Excited State 8: Singlet-A<br>4.1744 eV 297.01 nm f=0.0330  | <TDDFT>HOMO -> LUMO+10                                              | 56.7% |
| <TDDFT>HOMO -> LUMO+3                                               | <TDDFT>HOMO -> LUMO+13                                              | 19.5% |
| <TDDFT>HOMO -> LUMO+6                                               | <TDDFT> Excited State 15: Singlet-A<br>4.9415 eV 250.90 nm f=0.0001 |       |
| 73.3%                                                               | <TDDFT>HOMO-2 -> LUMO                                               | 2.2%  |
| <TDDFT>HOMO -> LUMO+8                                               | <TDDFT>HOMO-2 -> LUMO+1                                             | 89.5% |
| 12.2%                                                               | <TDDFT>HOMO-1 -> LUMO+4                                             | 2.1%  |
| <TDDFT> Excited State 9: Singlet-A<br>4.4400 eV 279.24 nm f=0.0097  | <TDDFT> Excited State 16: Singlet-A<br>5.0265 eV 246.66 nm f=0.0108 |       |
| <TDDFT>HOMO -> LUMO+6                                               | <TDDFT>HOMO-3 -> LUMO                                               | 20.2% |
| 11.4%                                                               | <TDDFT>HOMO-2 -> LUMO+6                                             | 4.4%  |
| <TDDFT>HOMO -> LUMO+8                                               | <TDDFT>HOMO-1 -> LUMO+1                                             | 2.3%  |
| 74.1%                                                               | <TDDFT>HOMO-1 -> LUMO+2                                             | 58.5% |
| <TDDFT>HOMO -> LUMO+9                                               | <TDDFT>HOMO-1 -> LUMO+5                                             | 4.4%  |
| 5.1%                                                                | <TDDFT> Excited State 17: Singlet-A<br>5.0425 eV 245.88 nm f=0.0796 |       |
| <TDDFT>HOMO -> LUMO+11                                              | <TDDFT>HOMO -> LUMO+7                                               | 4.8%  |
| 4.8%                                                                | <TDDFT>HOMO -> LUMO+10                                              | 20.7% |
| <TDDFT> Excited State 10: Singlet-A<br>4.6091 eV 269.00 nm f=0.1151 | <TDDFT>HOMO -> LUMO+13                                              | 4.9%  |
| <TDDFT>HOMO-1 -> LUMO                                               | <TDDFT> Excited State 12: Singlet-A<br>4.7971 eV 258.46 nm f=0.0013 |       |
| 85.6%                                                               | <TDDFT>HOMO-1 -> LUMO                                               | 2.1%  |
| <TDDFT> Excited State 11: Singlet-A<br>4.6211 eV 268.30 nm f=0.1588 |                                                                     |       |
| <TDDFT>HOMO-2 -> LUMO                                               |                                                                     |       |
| 79.7%                                                               |                                                                     |       |
| <TDDFT>HOMO-1 -> LUMO+4                                             |                                                                     |       |
| 2.3%                                                                |                                                                     |       |
| <TDDFT>HOMO -> LUMO+10                                              |                                                                     |       |
| 2.2%                                                                |                                                                     |       |
| <TDDFT>HOMO -> LUMO+13                                              |                                                                     |       |
| 4.9%                                                                |                                                                     |       |

|                                                                     |                                                                     |
|---------------------------------------------------------------------|---------------------------------------------------------------------|
| <TDDFT>HOMO -> LUMO+15<br>15.7%                                     | <TDDFT>HOMO -> LUMO+12<br>77.1%                                     |
| <TDDFT>HOMO -> LUMO+16 2.1%                                         | <TDDFT>HOMO -> LUMO+14 5.4%                                         |
| <TDDFT> Excited State 18: Singlet-A<br>5.0717 eV 244.46 nm f=0.0198 | <TDDFT>HOMO -> LUMO+18 3.1%                                         |
| <TDDFT>HOMO-2 -> LUMO+1 4.7%                                        | <TDDFT> Excited State 22: Singlet-A<br>5.2298 eV 237.07 nm f=0.0609 |
| <TDDFT>HOMO-2 -> LUMO+2<br>38.0%                                    | <TDDFT>HOMO-3 -> LUMO+4 2.4%                                        |
| <TDDFT>HOMO-2 -> LUMO+7 3.5%                                        | <TDDFT>HOMO-2 -> LUMO+2<br>33.4%                                    |
| <TDDFT>HOMO-1 -> LUMO+3<br>28.5%                                    | <TDDFT>HOMO-2 -> LUMO+5 6.9%                                        |
| <TDDFT>HOMO-1 -> LUMO+4 4.9%                                        | <TDDFT>HOMO-2 -> LUMO+7 2.9%                                        |
| <TDDFT>HOMO-1 -> LUMO+6 5.8%                                        | <TDDFT>HOMO-1 -> LUMO+3<br>40.0%                                    |
| <TDDFT> Excited State 19: Singlet-A<br>5.0884 eV 243.66 nm f=0.0465 | <TDDFT>HOMO -> LUMO+13 2.3%                                         |
| <TDDFT>HOMO-3 -> LUMO<br>26.1%                                      | <TDDFT>HOMO -> LUMO+22 2.0%                                         |
| <TDDFT>HOMO-2 -> LUMO+3<br>15.2%                                    | <TDDFT> Excited State 23: Singlet-A<br>5.2503 eV 236.14 nm f=0.0121 |
| <TDDFT>HOMO-2 -> LUMO+4 2.9%                                        | <TDDFT>HOMO -> LUMO+9 4.1%                                          |
| <TDDFT>HOMO-2 -> LUMO+6 2.9%                                        | <TDDFT>HOMO -> LUMO+11 3.8%                                         |
| <TDDFT>HOMO-1 -> LUMO+1 6.8%                                        | <TDDFT>HOMO -> LUMO+12 3.3%                                         |
| <TDDFT>HOMO-1 -> LUMO+2<br>18.3%                                    | <TDDFT>HOMO -> LUMO+14<br>75.9%                                     |
| <TDDFT>HOMO-1 -> LUMO+5 6.5%                                        | <TDDFT> Excited State 24: Singlet-A<br>5.2643 eV 235.52 nm f=0.0455 |
| <TDDFT>HOMO-1 -> LUMO+7 8.3%                                        | <TDDFT>HOMO-6 -> LUMO+2 3.0%                                        |
| <TDDFT>HOMO -> LUMO+12 2.0%                                         | <TDDFT>HOMO-5 -> LUMO 2.9%                                          |
| <TDDFT> Excited State 20: Singlet-A<br>5.0996 eV 243.13 nm f=0.0094 | <TDDFT>HOMO-5 -> LUMO+1 4.1%                                        |
| <TDDFT>HOMO -> LUMO+8 6.3%                                          | <TDDFT>HOMO-3 -> LUMO<br>22.7%                                      |
| <TDDFT>HOMO -> LUMO+9 3.2%                                          | <TDDFT>HOMO-3 -> LUMO+1<br>10.1%                                    |
| <TDDFT>HOMO -> LUMO+11<br>70.7%                                     | <TDDFT>HOMO-3 -> LUMO+2 2.9%                                        |
| <TDDFT>HOMO -> LUMO+12 8.1%                                         | <TDDFT>HOMO-2 -> LUMO+3<br>23.3%                                    |
| <TDDFT>HOMO -> LUMO+14 2.1%                                         | <TDDFT>HOMO-2 -> LUMO+4 2.0%                                        |
| <TDDFT>HOMO -> LUMO+20 2.8%                                         | <TDDFT>HOMO-2 -> LUMO+6 6.5%                                        |
| <TDDFT> Excited State 21: Singlet-A<br>5.2291 eV 237.11 nm f=0.0040 | <TDDFT>HOMO-1 -> LUMO+2 7.2%                                        |
| <TDDFT>HOMO -> LUMO+11 5.4%                                         | <TDDFT>HOMO -> LUMO+14 4.8%                                         |

### 6.1.3.5 Minimum geometry of excited state of native BBTT under IEFPCM variation of PCM

(PBE1PBE/6-311++G\*\*, IEFPCM CH<sub>2</sub>Cl<sub>2</sub>)

```
#p opt td=(nstates=3) PBE1PBE/6-
311++g(d,p) freq
scrf=(iefpcm,solvent=dichloromethane)
geom=check guess=read
 0 1
C 0 -5.473782 -2.037653 -0.034511
C 0 -4.615816 -3.137563 0.043676
C 0 -3.239118 -2.977102 0.045001
C 0 -2.688401 -1.683625 -0.032593
C 0 -3.577339 -0.582615 -0.112667
C 0 -4.951496 -0.744722 -0.114744
C 0 -1.328935 -1.267445 -0.049322
C 0 -1.187853 0.137169 -0.154920
S 0 -2.731321 0.964618 -0.202716
S 0 -0.000001 -2.339870 0.136139
C 0 1.328934 -1.267446 -0.049323
C 0 1.187853 0.137169 -0.154922
N 0 0.000000 0.801322 -0.183004
C 0 2.688400 -1.683627 -0.032593
C 0 3.577338 -0.582617 -0.112667
S 0 2.731322 0.964617 -0.202717
C 0 3.239116 -2.977104 0.045001
C 0 4.615814 -3.137565 0.043677
C 0 5.473781 -2.037656 -0.034509
C 0 4.951496 -0.744725 -0.114744
C 0 0.000001 2.231384 -0.188543
C 0 0.000003 2.935629 -1.387655
C 0 0.000004 4.324078 -1.368295
C 0 0.000003 5.002120 -0.153429
C 0 0.000001 4.305522 1.050213
C 0 -0.000000 2.924454 1.017436
F 0 -0.000001 2.231820 2.160595
H 0 -6.548362 -2.182926 -0.032880
H 0 -5.032978 -4.137656 0.103982
H 0 -2.589023 -3.844442 0.104607
H 0 -5.611641 0.114058 -0.175576
H 0 2.589021 -3.844443 0.104607
H 0 5.032975 -4.137659 0.103984
H 0 6.548360 -2.182930 -0.032878
H 0 5.611641 0.114055 -0.175575
H 0 0.000003 2.383633 -2.321034
H 0 0.000005 4.875143 -2.301444
H 0 0.000004 6.086400 -0.137586
H 0 0.000001 4.814940 2.006759
SCF Done: E(RPBE1PBE) = -
2193.43615101
Sum of electronic and zero-point
Energies= -2193.079784
Sum of electronic and thermal Energies=
-2193.057752
Sum of electronic and thermal
Enthalpies= -2193.056808
Sum of electronic and thermal Free
Energies= -2193.133723
```

### 6.1.3.6 TD-DFT calculation of excited state of native BBTT under IEFPCM variation of PCM

(PBE1PBE/6-311++G\*\*, IEFPCM CH<sub>2</sub>Cl<sub>2</sub>)

```
#p opt td=(nstates=3) PBE1PBE/6-
311++g(d,p) freq scrf=(iefpcm,solvent=
dichloromethane) geom=check
guess=read
<TDDFT> Excited State 1: Singlet-A
2.2299 eV 556.00 nm f=0.1153
<TDDFT>HOMO -> LUMO
98.2%
<TDDFT> Excited State 2: Singlet-A
2.7993 eV 442.91 nm f=0.0025
<TDDFT>HOMO -> LUMO+1
98.8%
<TDDFT> Excited State 3: Singlet-A
3.2416 eV 382.48 nm f=0.0000
<TDDFT>HOMO -> LUMO+2
97.0%
```

<TDDFT> Excited State 4: Singlet-A  
3.3904 eV 365.69 nm f=0.0008  
<TDDFT>HOMO -> LUMO+3 4.7%

<TDDFT>HOMO -> LUMO+4  
45.7%  
<TDDFT>HOMO -> LUMO+6  
45.8%

### 6.1.3.7 Minimum geometry of native BBTT under SMD variation of PCM (B3LYP/6-311++G\*\*,

SMD CH<sub>2</sub>Cl<sub>2</sub>)

Conformer I:

#p opt=tight freq=noraman rb3lyp/6-  
311++g(d,p) pop=full  
scrf=(SMD,solvent=dichloromethane)  
geom=check

0 1

C 0 -5.365287 -2.204002 -0.453721  
C 0 -4.518797 -3.207717 0.041956  
C 0 -3.178844 -2.949260 0.300444  
C 0 -2.662834 -1.665861 0.054037  
C 0 -3.530521 -0.670056 -0.453886  
C 0 -4.877694 -0.924171 -0.704340  
C 0 -1.335502 -1.154652 0.274289  
C 0 -1.193766 0.153382 -0.075125  
S 0 -2.686126 0.856985 -0.713547  
S 0 0.000003 -2.102511 0.993443  
C 0 1.335510 -1.154646 0.274300  
C 0 1.193770 0.153388 -0.075114  
N 0 0.000000 0.878825 -0.058612  
C 0 2.662842 -1.665852 0.054045  
C 0 3.530527 -0.670045 -0.453878  
S 0 2.686134 0.857001 -0.713517  
C 0 3.178852 -2.949253 0.300442  
C 0 4.518804 -3.207710 0.041945  
C 0 5.365292 -2.203992 -0.453732  
C 0 4.877698 -0.924160 -0.704342  
C 0 -0.000004 2.311113 -0.016917  
C 0 0.000002 3.071560 -1.188419  
C 0 -0.000001 4.463437 -1.121792  
C 0 -0.000011 5.101937 0.117807  
C 0 -0.000018 4.358921 1.298121  
C 0 -0.000014 2.978133 1.209819

F 0 -0.000020 2.245144 2.348076  
H 0 -6.408838 -2.424713 -0.646849  
H 0 -4.917206 -4.198717 0.228365  
H 0 -2.534474 -3.731738 0.685669  
H 0 -5.530569 -0.149137 -1.089517  
H 0 2.534483 -3.731734 0.685664  
H 0 4.917213 -4.198711 0.228346  
H 0 6.408841 -2.424703 -0.646865  
H 0 5.530572 -0.149124 -1.089515  
H 0 0.000010 2.561041 -2.144633  
H 0 0.000004 5.045562 -2.035416  
H 0 -0.000014 6.184403 0.172293  
H 0 -0.000026 4.832939 2.272343

SCF Done: E(RB3LYP) = -  
2195.07337702

Sum of electronic and zero-point  
Energies= -2194.797809

Sum of electronic and thermal Energies=  
-2194.776666

Sum of electronic and thermal  
Enthalpies= -2194.775722

Sum of electronic and thermal Free  
Energies= -2194.849339

Conformer II:

#p opt=tight freq=noraman rb3lyp/6-  
311++g(d,p) pop=full  
scrf=(SMD,solvent=dichloromethane)  
geom=check

0 1

C 0 -5.365882 -2.149504 -0.493038  
C 0 -4.521882 -3.211774 -0.133725  
C 0 -3.182922 -2.992864 0.164050  
C 0 -2.664390 -1.688165 0.098019  
C 0 -3.531387 -0.632563 -0.271643

|     |           |           |           |                                         |           |           |           |
|-----|-----------|-----------|-----------|-----------------------------------------|-----------|-----------|-----------|
| C 0 | -4.876911 | -0.847819 | -0.562271 | H 0                                     | -6.407992 | -2.341167 | -0.721504 |
| C 0 | -1.335288 | -1.212476 | 0.378725  | H 0                                     | -4.920972 | -4.218797 | -0.087841 |
| C 0 | -1.193906 | 0.131057  | 0.205199  | H 0                                     | -2.541343 | -3.822450 | 0.439877  |
| S 0 | -2.688806 | 0.915351  | -0.315485 | H 0                                     | -5.525785 | -0.025760 | -0.842384 |
| S 0 | -0.000000 | -2.246285 | 0.968951  | H 0                                     | 2.541342  | -3.822451 | 0.439877  |
| C 0 | 1.335288  | -1.212476 | 0.378728  | H 0                                     | 4.920970  | -4.218798 | -0.087845 |
| C 0 | 1.193906  | 0.131057  | 0.205201  | H 0                                     | 6.407990  | -2.341168 | -0.721509 |
| N 0 | -0.000000 | 0.849015  | 0.324529  | H 0                                     | 5.525784  | -0.025761 | -0.842385 |
| C 0 | 2.664390  | -1.688165 | 0.098021  | H 0                                     | 0.000002  | 4.988228  | -1.677745 |
| C 0 | 3.531387  | -0.632563 | -0.271642 | H 0                                     | -0.000001 | 6.157266  | 0.528531  |
| S 0 | 2.688808  | 0.915352  | -0.315477 | H 0                                     | -0.000004 | 4.834235  | 2.632130  |
| C 0 | 3.182921  | -2.992864 | 0.164050  | H 0                                     | -0.000003 | 2.346848  | 2.527071  |
| C 0 | 4.521881  | -3.211775 | -0.133727 | SCF Done: E(RB3LYP) = -                 |           |           |           |
| C 0 | 5.365881  | -2.149505 | -0.493041 | 2195.07249215                           |           |           |           |
| C 0 | 4.876911  | -0.847820 | -0.562273 | Sum of electronic and zero-point        |           |           |           |
| C 0 | -0.000000 | 2.280833  | 0.389128  | Energies= -2194.796945                  |           |           |           |
| C 0 | 0.000001  | 3.049793  | -0.776637 | Sum of electronic and thermal Energies= |           |           |           |
| C 0 | 0.000001  | 4.434438  | -0.746854 | -2194.775768                            |           |           |           |
| C 0 | -0.000001 | 5.074087  | 0.490721  | Sum of electronic and thermal           |           |           |           |
| C 0 | -0.000002 | 4.331454  | 1.672497  | Enthalpies= -2194.774824                |           |           |           |
| C 0 | -0.000002 | 2.940849  | 1.620511  | Sum of electronic and thermal Free      |           |           |           |
| F 0 | 0.000003  | 2.419620  | -1.976198 | Energies= -2194.848786                  |           |           |           |

### 6.1.3.8 Minimum geometry of radical cation of BBTT in gas phase (B3LYP/6-311++G\*\*)

```
#p ub3lyp/6-311++g(d,p) opt
freq=noraman scf=maxcycle=1000
0 1
```

|     |           |           |           |     |           |           |           |
|-----|-----------|-----------|-----------|-----|-----------|-----------|-----------|
| C 0 | 5.479655  | -2.025051 | 0.000362  | C 0 | -1.195309 | 0.113723  | -0.134485 |
| C 0 | 4.626267  | -3.137542 | 0.064869  | N 0 | -0.000000 | 0.796131  | -0.174858 |
| C 0 | 3.250554  | -2.978504 | 0.051547  | C 0 | -2.712075 | -1.682323 | -0.027451 |
| C 0 | 2.712075  | -1.682322 | -0.027451 | C 0 | -3.588181 | -0.575668 | -0.091650 |
| C 0 | 3.588181  | -0.575667 | -0.091650 | S 0 | -2.722860 | 0.961440  | -0.186905 |
| C 0 | 4.970254  | -0.732914 | -0.079025 | C 0 | -3.250554 | -2.978504 | 0.051547  |
| C 0 | 1.337937  | -1.264211 | -0.052793 | C 0 | -4.626267 | -3.137542 | 0.064869  |
| C 0 | 1.195309  | 0.113723  | -0.134485 | C 0 | -5.479655 | -2.025051 | 0.000361  |
| S 0 | 2.722860  | 0.961441  | -0.186904 | C 0 | -4.970253 | -0.732915 | -0.079026 |
| S 0 | -0.000000 | -2.381534 | 0.020601  | C 0 | -0.000000 | 2.242480  | -0.197386 |
| C 0 | -1.337937 | -1.264211 | -0.052792 | C 0 | -0.000001 | 2.941745  | 1.010257  |
|     |           |           |           | C 0 | -0.000001 | 4.325843  | 1.036060  |
|     |           |           |           | C 0 | -0.000000 | 5.016867  | -0.173871 |
|     |           |           |           | C 0 | 0.000001  | 4.331856  | -1.389761 |

|     |           |           |           |                                         |           |          |           |
|-----|-----------|-----------|-----------|-----------------------------------------|-----------|----------|-----------|
| C 0 | 0.000001  | 2.940924  | -1.404959 | H 0                                     | -0.000000 | 6.100089 | -0.164556 |
| F 0 | -0.000002 | 2.244686  | 2.158732  | H 0                                     | 0.000002  | 4.879064 | -2.323805 |
| H 0 | 6.552792  | -2.172015 | 0.012590  | H 0                                     | 0.000002  | 2.392279 | -2.339387 |
| H 0 | 5.050046  | -4.132216 | 0.126295  | SCF Done: E(UB3LYP) = -                 |           |          |           |
| H 0 | 2.601023  | -3.844939 | 0.102360  | 2194.82128397                           |           |          |           |
| H 0 | 5.633901  | 0.121601  | -0.128084 | Sum of electronic and zero-point        |           |          |           |
| H 0 | -2.601023 | -3.844940 | 0.102361  | Energies= -2194.544836                  |           |          |           |
| H 0 | -5.050046 | -4.132216 | 0.126295  | Sum of electronic and thermal Energies= |           |          |           |
| H 0 | -6.552791 | -2.172015 | 0.012590  | -2194.523782                            |           |          |           |
| H 0 | -5.633901 | 0.121601  | -0.128085 | Sum of electronic and thermal           |           |          |           |
| H 0 | -0.000002 | 4.838643  | 1.989669  | Enthalpies= -2194.522838                |           |          |           |
|     |           |           |           | Sum of electronic and thermal Free      |           |          |           |
|     |           |           |           | Energies= -2194.596708                  |           |          |           |

### 6.1.3.9 Minimum geometry of radical cation of BBTT under IEFPCM variation of PCM

(B3LYP/6-311++G\*\*, IEFPCM CH<sub>2</sub>Cl<sub>2</sub>)

```
#p ub3lyp/6-311++g(d,p) opt
freq=noraman scf=maxcycle=1000
scrf=(iefpcm,solvent=dichloromethane)
geom=check guess=read
0 1
```

|     |           |           |           |                                  |           |           |           |
|-----|-----------|-----------|-----------|----------------------------------|-----------|-----------|-----------|
| C 0 | 5.479436  | -2.024740 | 0.007818  | C 0                              | -4.969278 | -0.732031 | -0.060979 |
| C 0 | 4.625880  | -3.138209 | 0.057655  | C 0                              | 0.000002  | 2.238694  | -0.194807 |
| C 0 | 3.249335  | -2.979734 | 0.040326  | C 0                              | 0.000038  | 2.958687  | 0.999808  |
| C 0 | 2.710943  | -1.683117 | -0.028556 | C 0                              | 0.000041  | 4.342337  | 1.003814  |
| C 0 | 3.586392  | -0.575364 | -0.078592 | C 0                              | 0.000009  | 5.013191  | -0.217778 |
| C 0 | 4.969269  | -0.732053 | -0.060996 | C 0                              | -0.000027 | 4.307597  | -1.421604 |
| C 0 | 1.335607  | -1.266613 | -0.054863 | C 0                              | -0.000030 | 2.916505  | -1.413556 |
| C 0 | 1.193995  | 0.111393  | -0.122958 | F 0                              | 0.000070  | 2.282128  | 2.165356  |
| S 0 | 2.720750  | 0.961277  | -0.164101 | H 0                              | 6.552669  | -2.170746 | 0.023334  |
| S 0 | -0.000008 | -2.385000 | -0.003625 | H 0                              | 5.049025  | -4.133684 | 0.111157  |
| C 0 | -1.335618 | -1.266607 | -0.054859 | H 0                              | 2.599696  | -3.846176 | 0.080532  |
| C 0 | -1.194000 | 0.111399  | -0.122951 | H 0                              | 5.631446  | 0.123857  | -0.098543 |
| N 0 | -0.000001 | 0.793724  | -0.155256 | H 0                              | -2.599718 | -3.846165 | 0.080531  |
| C 0 | -2.710956 | -1.683105 | -0.028547 | H 0                              | -5.049048 | -4.133662 | 0.111160  |
| C 0 | -3.586400 | -0.575348 | -0.078577 | H 0                              | -6.552684 | -2.170717 | 0.023348  |
| S 0 | -2.720752 | 0.961290  | -0.164084 | H 0                              | -5.631451 | 0.123882  | -0.098521 |
| C 0 | -3.249353 | -2.979720 | 0.040330  | H 0                              | 0.000070  | 4.872240  | 1.947716  |
| C 0 | -4.625899 | -3.138189 | 0.057661  | H 0                              | 0.000011  | 6.096216  | -0.225804 |
| C 0 | -5.479450 | -2.024716 | 0.007830  | H 0                              | -0.000051 | 4.838202  | -2.364957 |
|     |           |           |           | H 0                              | -0.000056 | 2.348929  | -2.336113 |
|     |           |           |           | SCF Done: E(UB3LYP) = -          |           |           |           |
|     |           |           |           | 2194.87264561                    |           |           |           |
|     |           |           |           | Sum of electronic and zero-point |           |           |           |
|     |           |           |           | Energies= -2194.596343           |           |           |           |

Sum of electronic and thermal Energies=  
-2194.576117

Sum of electronic and thermal Free  
Energies= -2194.646755

Sum of electronic and thermal  
Enthalpies= -2194.575173

### 6.1.3.10 Minimum geometry of radical cation of BBTT under SMD variation of PCM

(B3LYP/6-311++G\*\*, SMD CH<sub>2</sub>Cl<sub>2</sub>)

#p ub3lyp/6-311++g(d,p) opt  
freq=noraman scf=maxcycle=1000  
scrf=(SMD,solvent=dichloromethane)

0 1  
C 0 5.476919 -2.032998 -0.010423  
C 0 4.620914 -3.144395 0.043380  
C 0 3.244574 -2.982924 0.036360  
C 0 2.710327 -1.684138 -0.025182  
C 0 3.588495 -0.578917 -0.081301  
C 0 4.970842 -0.738022 -0.074209  
C 0 1.336587 -1.263985 -0.041944  
C 0 1.193132 0.113197 -0.111217  
S 0 2.723413 0.960463 -0.162096  
S 0 -0.000001 -2.382170 0.024487  
C 0 -1.336588 -1.263984 -0.041944  
C 0 -1.193133 0.113198 -0.111217  
N 0 -0.000000 0.796105 -0.138270  
C 0 -2.710329 -1.684136 -0.025181  
C 0 -3.588496 -0.578915 -0.081299  
S 0 -2.723413 0.960464 -0.162094  
C 0 -3.244577 -2.982922 0.036361  
C 0 -4.620916 -3.144392 0.043382  
C 0 -5.476921 -2.032995 -0.010420  
C 0 -4.970843 -0.738019 -0.074206  
C 0 0.000000 2.241770 -0.189464  
C 0 0.000006 2.972486 0.998848

C 0 0.000006 4.355478 0.992474  
C 0 0.000000 5.016001 -0.234842  
C 0 -0.000006 4.300428 -1.432873  
C 0 -0.000005 2.909393 -1.414496  
F 0 0.000011 2.304921 2.172337  
H 0 6.550072 -2.182500 -0.002683  
H 0 5.042123 -4.141309 0.091365  
H 0 2.593676 -3.849048 0.077676  
H 0 5.637023 0.115396 -0.115495  
H 0 -2.593679 -3.849047 0.077676  
H 0 -5.042126 -4.141306 0.091367  
H 0 -6.550074 -2.182496 -0.002680  
H 0 -5.637024 0.115399 -0.115492  
H 0 0.000011 4.892829 1.932737  
H 0 0.000000 6.099473 -0.251624  
H 0 -0.000010 4.823385 -2.381038  
H 0 -0.000010 2.334827 -2.333220

SCF Done: E(UB3LYP) = -  
2194.89906730

Sum of electronic and zero-point  
Energies= -2194.622732

Sum of electronic and thermal Energies=  
-2194.601727

Sum of electronic and thermal  
Enthalpies= -2194.600783

Sum of electronic and thermal Free  
Energies= -2194.674733

### 6.1.3.11 Transition state of native BBTT under IEFPCM variation of PCM (B3LYP/6-311G\*\*,

IEFPCM CH<sub>2</sub>Cl<sub>2</sub>)

#p opt=(ts,noeigen,calcfc) freq=noraman  
b3lyp/6-311++g(d,p) pop=full  
scrf=(iefpcm,solvent=dichloromethane)

0 1

C 0 5.496827 -2.018233 0.087415  
C 0 4.633329 -3.122450 0.146518  
C 0 3.255346 -2.956611 0.088223  
C 0 2.719122 -1.662738 -0.031317



|     |           |           |           |                                         |           |           |           |
|-----|-----------|-----------|-----------|-----------------------------------------|-----------|-----------|-----------|
| C 0 | 3.607119  | -0.563259 | -0.090464 | F 0                                     | 0.002679  | 2.120394  | 2.129811  |
| C 0 | 4.988923  | -0.726916 | -0.031381 | H 0                                     | 6.569010  | -2.167971 | 0.134293  |
| C 0 | 1.343630  | -1.249081 | -0.105342 | H 0                                     | 5.047491  | -4.119799 | 0.239521  |
| C 0 | 1.197167  | 0.100408  | -0.213381 | H 0                                     | 2.598870  | -3.818143 | 0.136519  |
| S 0 | 2.736609  | 0.960794  | -0.238353 | H 0                                     | 5.653984  | 0.127459  | -0.076299 |
| S 0 | -0.000119 | -2.429464 | -0.086743 | H 0                                     | -2.599018 | -3.817985 | 0.137445  |
| C 0 | -1.343792 | -1.248959 | -0.104758 | H 0                                     | -5.047636 | -4.119641 | 0.240540  |
| C 0 | -1.197278 | 0.100517  | -0.213082 | H 0                                     | -6.569180 | -2.167863 | 0.134727  |
| N 0 | -0.000181 | 0.815783  | -0.320946 | H 0                                     | -5.654154 | 0.127561  | -0.075972 |
| C 0 | -2.719280 | -1.662608 | -0.030739 | H 0                                     | 0.002559  | 4.709747  | 2.119199  |
| C 0 | -3.607288 | -0.563146 | -0.090028 | H 0                                     | -0.000161 | 6.112231  | 0.054309  |
| S 0 | -2.736788 | 0.960891  | -0.238113 | H 0                                     | -0.002962 | 5.029384  | -2.180457 |
| C 0 | -3.255500 | -2.956465 | 0.089012  | H 0                                     | -0.002905 | 2.544892  | -2.348472 |
| C 0 | -4.633485 | -3.122308 | 0.147310  | SCF Done: E(RB3LYP) = -                 |           |           |           |
| C 0 | -5.496994 | -2.018116 | 0.087964  | 2195.04919169                           |           |           |           |
| C 0 | -4.989089 | -0.726806 | -0.030959 | Sum of electronic and zero-point        |           |           |           |
| C 0 | -0.000147 | 2.245531  | -0.231302 | Energies= -2194.773710                  |           |           |           |
| C 0 | 0.001320  | 2.881151  | 1.012894  | Sum of electronic and thermal Energies= |           |           |           |
| C 0 | 0.001380  | 4.260075  | 1.134205  | -2194.753345                            |           |           |           |
| C 0 | -0.000177 | 5.031855  | -0.026803 | Sum of electronic and thermal           |           |           |           |
| C 0 | -0.001752 | 4.424419  | -1.282349 | Enthalpies= -2194.752400                |           |           |           |
| C 0 | -0.001711 | 3.035503  | -1.382585 | Sum of electronic and thermal Free      |           |           |           |
|     |           |           |           | Energies= -2194.823812                  |           |           |           |

#### 6.1.4 *anti-anti-N-ortho*-methylphenyl-BBTT 3d

##### 6.1.4.1 Minimum geometry of native BBTT in gas phase (B3LYP/6-311++G\*\*)

|                                          |     |           |           |           |
|------------------------------------------|-----|-----------|-----------|-----------|
| Conformer I:                             | S 0 | 0.000233  | -2.093760 | 1.017180  |
| #p opt freq=noraman rb3lyp/6-311++g(d,p) | C 0 | -1.332950 | -1.150517 | 0.290472  |
| pop=full                                 | C 0 | -1.191868 | 0.160875  | -0.048904 |
| 0 1                                      | N 0 | -0.000010 | 0.887277  | -0.016645 |
| C 0                                      | C 0 | -2.655016 | -1.662707 | 0.050915  |
| C 0                                      | C 0 | -3.519345 | -0.665746 | -0.459558 |
| C 0                                      | S 0 | -2.679646 | 0.865690  | -0.695980 |
| C 0                                      | C 0 | -3.168390 | -2.949976 | 0.277009  |
| C 0                                      | C 0 | -4.502967 | -3.212280 | 0.000287  |
| C 0                                      | C 0 | -5.347416 | -2.208166 | -0.495816 |
| C 0                                      | C 0 | -4.861343 | -0.925254 | -0.728108 |
| S 0                                      | C 0 | -0.000185 | 2.328346  | -0.001567 |
| C 0                                      |     |           |           |           |
| C 0                                      |     |           |           |           |
| C 0                                      |     |           |           |           |
| C 0                                      |     |           |           |           |
| C 0                                      |     |           |           |           |
| C 0                                      |     |           |           |           |
| C 0                                      |     |           |           |           |
| C 0                                      |     |           |           |           |
| C 0                                      |     |           |           |           |
| C 0                                      |     |           |           |           |
| S 0                                      |     |           |           |           |

|                                          |           |           |           |     |           |           |           |
|------------------------------------------|-----------|-----------|-----------|-----|-----------|-----------|-----------|
| C O                                      | -0.000887 | 3.008407  | 1.227943  | C O | 3.554702  | -0.613943 | 0.219504  |
| C O                                      | -0.001048 | 4.405903  | 1.191615  | C O | 4.912383  | -0.819353 | 0.451244  |
| C O                                      | -0.000525 | 5.103078  | -0.015277 | C O | 1.335175  | -1.224733 | -0.313377 |
| C O                                      | 0.000168  | 4.411827  | -1.223446 | C O | 1.194063  | 0.122899  | -0.170445 |
| C O                                      | 0.000319  | 3.019103  | -1.213538 | S O | 2.706946  | 0.929693  | 0.256258  |
| C O                                      | -0.001436 | 2.259641  | 2.535538  | S O | 0.000013  | -2.295536 | -0.829368 |
| H O                                      | 6.387906  | -2.430217 | -0.703573 | C O | -1.335154 | -1.224767 | -0.313318 |
| H O                                      | 4.900065  | -4.205747 | 0.171826  | C O | -1.194064 | 0.122867  | -0.170386 |
| H O                                      | 2.521222  | -3.730467 | 0.658597  | N O | -0.000012 | 0.841975  | -0.256279 |
| H O                                      | 5.511693  | -0.148239 | -1.115140 | C O | -2.677660 | -1.682672 | -0.080201 |
| H O                                      | -2.520311 | -3.731023 | 0.658054  | C O | -3.554679 | -0.614014 | 0.219615  |
| H O                                      | -4.898980 | -4.206804 | 0.170995  | S O | -2.706922 | 0.929619  | 0.256486  |
| H O                                      | -6.387182 | -2.431481 | -0.704301 | C O | -3.198335 | -2.986177 | -0.134621 |
| H O                                      | -5.511481 | -0.149188 | -1.115313 | C O | -4.549852 | -3.193427 | 0.104483  |
| H O                                      | -0.001572 | 4.955148  | 2.127190  | C O | -5.404738 | -2.119771 | 0.393308  |
| H O                                      | -0.000654 | 6.187314  | -0.009504 | C O | -4.912362 | -0.819439 | 0.451329  |
| H O                                      | 0.000567  | 4.947880  | -2.165155 | C O | -0.000054 | 2.280807  | -0.343686 |
| H O                                      | 0.000810  | 2.458486  | -2.141149 | C O | 0.000105  | 3.072238  | 0.815866  |
| H O                                      | -0.880028 | 1.614734  | 2.624587  | C O | 0.000026  | 4.464189  | 0.643519  |
| H O                                      | 0.877015  | 1.614648  | 2.625286  | C O | -0.000198 | 5.044474  | -0.618925 |
| H O                                      | -0.001753 | 2.953851  | 3.377251  | C O | -0.000361 | 4.240547  | -1.759426 |
| SCF Done: E(RB3LYP) = -                  |           |           |           | C O | -0.000290 | 2.859637  | -1.616759 |
| 2135.10606601                            |           |           |           | C O | 0.000396  | 2.493427  | 2.209945  |
| Sum of electronic and zero-point         |           |           |           | H O | 6.457574  | -2.301272 | 0.574983  |
| Energies= -2134.794731                   |           |           |           | H O | 4.951034  | -4.199683 | 0.066285  |
| Sum of electronic and thermal Energies=  |           |           |           | H O | 2.543817  | -3.821749 | -0.354884 |
| -2134.772665                             |           |           |           | H O | 5.570648  | 0.011878  | 0.676314  |
| Sum of electronic and thermal            |           |           |           | H O | -2.543771 | -3.821793 | -0.354886 |
| Enthalpies= -2134.771721                 |           |           |           | H O | -4.950988 | -4.199757 | 0.066259  |
| Sum of electronic and thermal Free       |           |           |           | H O | -6.457544 | -2.301372 | 0.575011  |
| Energies= -2134.847709                   |           |           |           | H O | -5.570632 | 0.011778  | 0.676435  |
| Conformer II:                            |           |           |           | H O | 0.000134  | 5.098502  | 1.524169  |
| #p opt freq=noraman rb3lyp/6-311++g(d,p) |           |           |           | H O | -0.000257 | 6.124479  | -0.715008 |
| pop=full                                 |           |           |           | H O | -0.000544 | 4.685796  | -2.747349 |
| 0 1                                      |           |           |           | H O | -0.000417 | 2.209619  | -2.483873 |
| C O                                      | 5.404768  | -2.119683 | 0.393270  | H O | -0.000336 | 1.404907  | 2.208213  |
| C O                                      | 4.549892  | -3.193354 | 0.104470  | H O | 0.882857  | 2.828543  | 2.762270  |
| C O                                      | 3.198375  | -2.986120 | -0.134653 |     |           |           |           |
| C O                                      | 2.677692  | -1.682617 | -0.080280 |     |           |           |           |

H O -0.881050 2.829762 2.763136  
 SCF Done: E(RB3LYP) = -  
 2135.10410238  
 Sum of electronic and zero-point  
 Energies= -2134.792993

Sum of electronic and thermal Energies=  
 -2134.771695  
 Sum of electronic and thermal  
 Enthalpies= -2134.770751  
 Sum of electronic and thermal Free  
 Energies= -2134.844805

#### 6.1.4.2 Minimum geometry of native BBT under IEFPCM variation of PCM (B3LYP/6-311G\*\*,

##### IEFPCM CH<sub>2</sub>Cl<sub>2</sub>)

Conformer I:

#p opt freq=noraman b3lyp/6-311g\*\*  
 scrf=(iefpcm,solvent=dichloromethane)  
 pop=full geom=check guess=read

0 1

C O 5.348790 -2.200801 -0.506813  
 C O 4.507090 -3.212437 -0.021049  
 C O 3.172153 -2.956578 0.260060  
 C O 2.655541 -1.667701 0.048054  
 C O 3.518292 -0.662676 -0.450173  
 C O 4.860763 -0.915823 -0.722890  
 C O 1.333702 -1.159163 0.295483  
 C O 1.190488 0.156490 -0.026533  
 S O 2.675343 0.871399 -0.667210  
 S O 0.000001 -2.107643 1.019166  
 C O -1.333701 -1.159164 0.295482  
 C O -1.190488 0.156490 -0.026533  
 N O -0.000000 0.881555 0.018366  
 C O -2.655540 -1.667702 0.048054  
 C O -3.518292 -0.662678 -0.450174  
 S O -2.675343 0.871398 -0.667210  
 C O -3.172152 -2.956580 0.260060  
 C O -4.507089 -3.212438 -0.021049  
 C O -5.348788 -2.200803 -0.506813  
 C O -4.860763 -0.915825 -0.722890  
 C O -0.000000 2.324101 0.002780  
 C O -0.000001 3.027421 1.219058  
 C O -0.000002 4.423918 1.154380  
 C O -0.000002 5.095953 -0.066748  
 C O -0.000000 4.380906 -1.261245

C O 0.000000 2.988604 -1.224301  
 C O -0.000002 2.305272 2.541631  
 H O 6.388870 -2.419166 -0.718229  
 H O 4.905500 -4.207730 0.138535  
 H O 2.528244 -3.743472 0.636014  
 H O 5.508904 -0.133935 -1.100816  
 H O -2.528242 -3.743473 0.636014  
 H O -4.905498 -4.207732 0.138535  
 H O -6.388869 -2.419168 -0.718229  
 H O -5.508903 -0.133937 -1.100817  
 H O -0.000003 4.991788 2.078354  
 H O -0.000002 6.179839 -0.082809  
 H O -0.000000 4.897868 -2.213263  
 H O 0.000001 2.410927 -2.141113  
 H O -0.879049 1.662915 2.643926  
 H O 0.879041 1.662911 2.643925  
 H O -0.000000 3.016301 3.368492

SCF Done: E(RB3LYP) = -  
 2135.09897123

Sum of electronic and zero-point  
 Energies= -2134.787545

Sum of electronic and thermal Energies=  
 -2134.765516

Sum of electronic and thermal  
 Enthalpies= -2134.764571

Sum of electronic and thermal Free  
 Energies= -2134.840161

Conformer II:

#p opt freq=noraman b3lyp/6-311g\*\*  
 scrf=(iefpcm,solvent=dichloromethane)  
 pop=full geom=check guess=read

0 1

|     |           |           |           |                                         |           |           |           |
|-----|-----------|-----------|-----------|-----------------------------------------|-----------|-----------|-----------|
| C 0 | 5.398575  | -2.113352 | 0.419529  | C 0                                     | -0.000058 | 2.888385  | -1.611313 |
| C 0 | 4.547086  | -3.190562 | 0.132757  | C 0                                     | 0.000085  | 2.436942  | 2.209186  |
| C 0 | 3.197635  | -2.986875 | -0.120643 | H 0                                     | 6.449675  | -2.292427 | 0.612387  |
| C 0 | 2.675620  | -1.682801 | -0.082352 | H 0                                     | 4.949225  | -4.196765 | 0.107185  |
| C 0 | 3.549943  | -0.610598 | 0.214564  | H 0                                     | 2.547242  | -3.825620 | -0.341310 |
| C 0 | 4.905873  | -0.812584 | 0.460136  | H 0                                     | 5.561352  | 0.020971  | 0.683302  |
| C 0 | 1.335657  | -1.226142 | -0.330499 | H 0                                     | -2.547266 | -3.825612 | -0.341314 |
| C 0 | 1.192755  | 0.122921  | -0.201930 | H 0                                     | -4.949265 | -4.196739 | 0.107111  |
| S 0 | 2.701007  | 0.934380  | 0.229947  | H 0                                     | -6.449707 | -2.292392 | 0.612303  |
| S 0 | -0.000008 | -2.296694 | -0.853468 | H 0                                     | -5.561359 | 0.020994  | 0.683289  |
| C 0 | -1.335657 | -1.226146 | -0.330449 | H 0                                     | 0.000073  | 5.054505  | 1.581997  |
| C 0 | -1.192752 | 0.122916  | -0.201880 | H 0                                     | -0.000015 | 6.131061  | -0.633338 |
| N 0 | -0.000002 | 0.839851  | -0.297268 | H 0                                     | -0.000102 | 4.740247  | -2.698250 |
| C 0 | -2.675624 | -1.682799 | -0.082308 | H 0                                     | -0.000093 | 2.259484  | -2.493562 |
| C 0 | -3.549943 | -0.610590 | 0.214599  | H 0                                     | 0.000119  | 1.348614  | 2.186655  |
| S 0 | -2.700979 | 0.934371  | 0.230095  | H 0                                     | 0.880845  | 2.763325  | 2.768710  |
| C 0 | -3.197654 | -2.986865 | -0.120641 | H 0                                     | -0.880684 | 2.763266  | 2.768731  |
| C 0 | -4.547115 | -3.190541 | 0.132714  |                                         |           |           |           |
| C 0 | -5.398600 | -2.113325 | 0.419475  | SCF Done: E(RB3LYP) = -                 |           |           |           |
| C 0 | -4.905885 | -0.812563 | 0.460116  | 2135.09705077                           |           |           |           |
| C 0 | -0.000006 | 2.282262  | -0.350923 | Sum of electronic and zero-point        |           |           |           |
| C 0 | 0.000043  | 3.045518  | 0.827826  | Energies=                               |           |           |           |
| C 0 | 0.000036  | 4.441028  | 0.687197  | -2134.785699                            |           |           |           |
| C 0 | -0.000014 | 5.049389  | -0.562015 | Sum of electronic and thermal Energies= |           |           |           |
| C 0 | -0.000060 | 4.272255  | -1.721180 | -2134.763594                            |           |           |           |
|     |           |           |           | Sum of electronic and thermal           |           |           |           |
|     |           |           |           | Enthalpies=                             |           |           |           |
|     |           |           |           | -2134.762649                            |           |           |           |
|     |           |           |           | Sum of electronic and thermal Free      |           |           |           |
|     |           |           |           | Energies=                               |           |           |           |
|     |           |           |           | -2134.838949                            |           |           |           |

#### 6.1.4.3 Minimum geometry of native BBTT under IEFPCM variation of PCM

(B3LYP/6-311++G\*\*, IEFPCM CH<sub>2</sub>Cl<sub>2</sub>)

|                                          |          |           |           |           |           |           |           |
|------------------------------------------|----------|-----------|-----------|-----------|-----------|-----------|-----------|
| Conformer I:                             | C 0      | 4.872844  | -0.903663 | -0.699719 |           |           |           |
| #p opt freq=noraman rb3lyp/6-311++g(d,p) | C 0      | 1.334293  | -1.165200 | 0.279159  |           |           |           |
| scrf=(iefpcm,solvent=dichloromethane)    | C 0      | 1.190748  | 0.153223  | -0.034060 |           |           |           |
| pop=full                                 | S 0      | 2.681936  | 0.876932  | -0.649931 |           |           |           |
| 0 1                                      | S 0      | 0.000009  | -2.131176 | 0.976640  |           |           |           |
| C 0                                      | 5.362803 | -2.189689 | -0.487769 | C 0       | -1.334281 | -1.165209 | 0.279157  |
| C 0                                      | 4.518456 | -3.207396 | -0.017816 | C 0       | -1.190744 | 0.153215  | -0.034059 |
| C 0                                      | 3.179184 | -2.956799 | 0.251846  | N 0       | -0.000001 | 0.878386  | 0.007971  |
| C 0                                      | 2.661364 | -1.667177 | 0.044404  | C 0       | -2.661349 | -1.667195 | 0.044400  |
| C 0                                      | 3.526817 | -0.656168 | -0.437578 |           |           |           |           |

C O -3.526808 -0.656190 -0.437581  
 S O -2.681937 0.876916 -0.649928  
 C O -3.179160 -2.956821 0.251835  
 C O -4.518429 -3.207427 -0.017829  
 C O -5.362783 -2.189724 -0.487781  
 C O -4.872833 -0.903694 -0.699725  
 C O -0.000007 2.321360 -0.003608  
 C O -0.000025 3.021599 1.214734  
 C O -0.000033 4.418935 1.153664  
 C O -0.000023 5.094538 -0.066176  
 C O -0.000005 4.381966 -1.262890  
 C O 0.000003 2.989182 -1.228938  
 C O -0.000036 2.297758 2.536448  
 H O 6.405524 -2.403868 -0.690754  
 H O 4.917803 -4.202909 0.138625  
 H O 2.534271 -3.748775 0.615529  
 H O 5.522812 -0.117317 -1.065373  
 H O -2.534242 -3.748794 0.615517  
 H O -4.917770 -4.202943 0.138607  
 H O -6.405502 -2.403910 -0.690767  
 H O -5.522805 -0.117351 -1.065377  
 H O -0.000047 4.984706 2.079088  
 H O -0.000029 6.178589 -0.079494  
 H O 0.000003 4.901132 -2.213861  
 H O 0.000014 2.414258 -2.147702  
 H O -0.879246 1.655470 2.638503  
 H O 0.879144 1.655431 2.638497  
 H O -0.000019 3.008262 3.363969

SCF Done: E(RB3LYP) = -2135.11318664

Sum of electronic and zero-point Energies= -2134.801951

Sum of electronic and thermal Energies= -2134.779904

Sum of electronic and thermal Enthalpies= -2134.778960

Sum of electronic and thermal Free Energies= -2134.854657

Conformer II:

#p opt freq=noraman rb3lyp/6-311++g(d,p)  
 scrf=(iefpcm,solvent=dichloromethane)  
 pop=full

0 1

C O 5.421020 -2.099315 0.372352  
 C O 4.566899 -3.182312 0.114088  
 C O 3.210637 -2.985280 -0.112303  
 C O 2.685053 -1.682096 -0.075715  
 C O 3.562495 -0.603987 0.190662  
 C O 4.924157 -0.798917 0.410775  
 C O 1.337259 -1.233094 -0.296329  
 C O 1.192923 0.117576 -0.179329  
 S O 2.708954 0.937650 0.205909  
 S O -0.000050 -2.324784 -0.766879  
 C O -1.337324 -1.233059 -0.296310  
 C O -1.192950 0.117607 -0.179306  
 N O -0.000004 0.834812 -0.266916  
 C O -2.685126 -1.682027 -0.075670  
 C O -3.562535 -0.603897 0.190723  
 S O -2.708960 0.937720 0.205938  
 C O -3.210742 -2.985198 -0.112248  
 C O -4.567005 -3.182198 0.114172  
 C O -5.421094 -2.099179 0.372452  
 C O -4.924199 -0.798793 0.410863  
 C O 0.000016 2.276872 -0.334478  
 C O 0.000175 3.050870 0.837016  
 C O 0.000171 4.445599 0.683670  
 C O 0.000025 5.042821 -0.571547  
 C O -0.000121 4.254583 -1.724008  
 C O -0.000123 2.871233 -1.600860  
 C O 0.000396 2.454203 2.223265  
 H O 6.476623 -2.273062 0.544908  
 H O 4.971752 -4.187544 0.089453  
 H O 2.559571 -3.829177 -0.310777  
 H O 5.581511 0.038953 0.611644  
 H O -2.559700 -3.829111 -0.310734  
 H O -4.971882 -4.187420 0.089545  
 H O -6.476698 -2.272901 0.545028

|     |           |          |           |                                         |
|-----|-----------|----------|-----------|-----------------------------------------|
| H O | -5.581530 | 0.039093 | 0.611740  | SCF Done: E(RB3LYP) = -                 |
| H O | 0.000293  | 5.067589 | 1.572749  | 2135.11143582                           |
| H O | 0.000029  | 6.123920 | -0.652780 | Sum of electronic and zero-point        |
| H O | -0.000234 | 4.713409 | -2.705557 | Energies= -2134.800399                  |
| H O | -0.000239 | 2.234708 | -2.477916 | Sum of electronic and thermal Energies= |
| H O | 0.000182  | 1.365556 | 2.209394  | -2134.778205                            |
| H O | 0.881337  | 2.785244 | 2.780089  | Sum of electronic and thermal           |
| H O | -0.880137 | 2.785598 | 2.780520  | Enthalpies= -2134.777261                |
|     |           |          |           | Sum of electronic and thermal Free      |
|     |           |          |           | Energies= -2134.854511                  |

#### 6.1.4.4 Minimum geometry of native BBT under IEFPCM variation of PCM

(PBE1PBE/6-311++G\*\*, IEFPCM CH<sub>2</sub>Cl<sub>2</sub>)

|                                       |           |           |           |                                         |           |           |           |
|---------------------------------------|-----------|-----------|-----------|-----------------------------------------|-----------|-----------|-----------|
| #p opt freq=norman PBE1PBE/6-         | C O       | -0.000001 | 4.424337  | 1.080966                                |           |           |           |
| 311++g(d,p)                           | C O       | -0.000001 | 5.055210  | -0.158742                               |           |           |           |
| scrf=(iefpcm,solvent=dichloromethane) | C O       | -0.000000 | 4.305111  | -1.328634                               |           |           |           |
| pop=full geom=check guess=read        | C O       | 0.000000  | 2.917877  | -1.248449                               |           |           |           |
| 0 1                                   | C O       | -0.000001 | 2.348602  | 2.520901                                |           |           |           |
| C O                                   | 5.344716  | -2.155201 | -0.497860 | H O                                     | 6.390138  | -2.357892 | -0.704121 |
| C O                                   | 4.507130  | -3.188708 | -0.061249 | H O                                     | 4.912723  | -4.186801 | 0.067257  |
| C O                                   | 3.169390  | -2.955422 | 0.211165  | H O                                     | 2.525815  | -3.761175 | 0.550056  |
| C O                                   | 2.647408  | -1.666440 | 0.039723  | H O                                     | 5.496821  | -0.068189 | -1.014349 |
| C O                                   | 3.505198  | -0.638840 | -0.407367 | H O                                     | -2.525814 | -3.761175 | 0.550056  |
| C O                                   | 4.850483  | -0.869837 | -0.673238 | H O                                     | -4.912722 | -4.186801 | 0.067257  |
| C O                                   | 1.321932  | -1.180107 | 0.281832  | H O                                     | -6.390137 | -2.357893 | -0.704121 |
| C O                                   | 1.182808  | 0.144674  | 0.003389  | H O                                     | -5.496821 | -0.068190 | -1.014349 |
| S O                                   | 2.659908  | 0.882538  | -0.576867 | H O                                     | -0.000002 | 5.021344  | 1.987977  |
| S O                                   | 0.000000  | -2.155049 | 0.950373  | H O                                     | -0.000001 | 6.139234  | -0.209244 |
| C O                                   | -1.321932 | -1.180107 | 0.281831  | H O                                     | -0.000000 | 4.793153  | -2.297062 |
| C O                                   | -1.182807 | 0.144673  | 0.003389  | H O                                     | 0.000000  | 2.308929  | -2.146816 |
| N O                                   | -0.000000 | 0.865789  | 0.064431  | H O                                     | -0.879410 | 1.707609  | 2.636627  |
| C O                                   | -2.647408 | -1.666441 | 0.039723  | H O                                     | 0.879407  | 1.707609  | 2.636628  |
| C O                                   | -3.505198 | -0.638840 | -0.407368 | H O                                     | -0.000001 | 3.079348  | 3.331232  |
| S O                                   | -2.659908 | 0.882538  | -0.576868 | SCF Done: E(RPBE1PBE) = -               |           |           |           |
| C O                                   | -3.169389 | -2.955423 | 0.211165  | 2133.55187077                           |           |           |           |
| C O                                   | -4.507130 | -3.188709 | -0.061249 | Sum of electronic and zero-point        |           |           |           |
| C O                                   | -5.344716 | -2.155202 | -0.497859 | Energies= -2133.237778                  |           |           |           |
| C O                                   | -4.850483 | -0.869838 | -0.673238 | Sum of electronic and thermal Energies= |           |           |           |
| C O                                   | -0.000000 | 2.296573  | -0.002816 | -2133.215828                            |           |           |           |
| C O                                   | -0.000001 | 3.033714  | 1.188273  | Sum of electronic and thermal           |           |           |           |
|                                       |           |           |           | Enthalpies= -2133.214884                |           |           |           |

Sum of electronic and thermal Free  
Energies= -2133.290768

#### 6.1.4.5 TD-DFT calculation of ground state of native BBTT under IEFPCM variation of PCM

(PBE1PBE/6-311++G\*\*, IEFPCM CH<sub>2</sub>Cl<sub>2</sub>)

#p td=(singlets,nstates=24) PBE1PBE/6-  
311++g(d,p) scrf=(iefpcm,solvent  
=dichloromethane) geom=check  
guess=read

<TDDFT> Excited State 1: Singlet-A  
2.9850 eV 415.35 nm f=0.1496

<TDDFT>HOMO -> LUMO  
96.0%

<TDDFT> Excited State 2: Singlet-A  
3.5363 eV 350.60 nm f=0.0052

<TDDFT>HOMO -> LUMO+1  
98.8%

<TDDFT> Excited State 3: Singlet-A  
3.6699 eV 337.84 nm f=0.0034

<TDDFT>HOMO -> LUMO+2  
87.4%

<TDDFT>HOMO -> LUMO+5 2.7%

<TDDFT>HOMO -> LUMO+7 5.1%

<TDDFT> Excited State 4: Singlet-A  
3.8746 eV 320.00 nm f=0.0459

<TDDFT>HOMO -> LUMO+3  
71.8%

<TDDFT>HOMO -> LUMO+4  
22.7%

<TDDFT> Excited State 5: Singlet-A  
3.8938 eV 318.42 nm f=0.0533

<TDDFT>HOMO -> LUMO+3  
17.7%

<TDDFT>HOMO -> LUMO+4  
70.9%

<TDDFT>HOMO -> LUMO+6 5.3%

<TDDFT>HOMO -> LUMO+8 2.4%

<TDDFT> Excited State 6: Singlet-A  
3.9655 eV 312.66 nm f=0.0183

<TDDFT>HOMO -> LUMO+2 6.3%

<TDDFT>HOMO -> LUMO+5  
85.3%

<TDDFT>HOMO -> LUMO+7 4.6%

<TDDFT> Excited State 7: Singlet-A  
4.1012 eV 302.31 nm f=0.0112

<TDDFT>HOMO -> LUMO+2 4.2%

<TDDFT>HOMO -> LUMO+5 8.5%

<TDDFT>HOMO -> LUMO+7  
74.8%

<TDDFT>HOMO -> LUMO+10 7.8%

<TDDFT> Excited State 8: Singlet-A  
4.1557 eV 298.35 nm f=0.0318

<TDDFT>HOMO -> LUMO+3 6.0%

<TDDFT>HOMO -> LUMO+4 3.4%

<TDDFT>HOMO -> LUMO+6  
49.8%

<TDDFT>HOMO -> LUMO+8  
35.1%

<TDDFT> Excited State 9: Singlet-A  
4.3336 eV 286.10 nm f=0.0097

<TDDFT>HOMO -> LUMO+6  
35.4%

<TDDFT>HOMO -> LUMO+8  
53.2%

<TDDFT>HOMO -> LUMO+9 3.8%

<TDDFT>HOMO -> LUMO+12 3.1%

<TDDFT> Excited State 10: Singlet-A  
4.6028 eV 269.36 nm f=0.1243

<TDDFT>HOMO-2 -> LUMO+3 2.3%

<TDDFT>HOMO-1 -> LUMO  
84.5%

<TDDFT> Excited State 11: Singlet-A  
4.6095 eV 268.98 nm f=0.1374

<TDDFT>HOMO-3 -> LUMO+3 2.1%

<TDDFT>HOMO-2 -> LUMO  
78.8%

<TDDFT>HOMO-1 -> LUMO+4 2.5%

<TDDFT>HOMO -> LUMO+10 3.4%

<TDDFT>HOMO -> LUMO+13 5.3%

<TDDFT>HOMO -> LUMO+15 2.1%

|                                                                     |       |                                                                     |       |
|---------------------------------------------------------------------|-------|---------------------------------------------------------------------|-------|
| <TDDFT> Excited State 12: Singlet-A<br>4.7297 eV 262.14 nm f=0.0071 |       | <TDDFT>HOMO-3 -> LUMO<br>20.8%                                      |       |
| <TDDFT>HOMO-1 -> LUMO                                               | 2.0%  | <TDDFT>HOMO-2 -> LUMO+6                                             | 3.7%  |
| <TDDFT>HOMO -> LUMO+8                                               | 2.8%  | <TDDFT>HOMO-1 -> LUMO+1                                             | 16.6% |
| <TDDFT>HOMO -> LUMO+9                                               | 84.6% | <TDDFT>HOMO-1 -> LUMO+2                                             | 43.8% |
| <TDDFT>HOMO -> LUMO+12                                              | 2.6%  | <TDDFT>HOMO-1 -> LUMO+5                                             | 3.4%  |
| <TDDFT>HOMO -> LUMO+14                                              | 3.1%  | <TDDFT> Excited State 18: Singlet-A<br>5.0614 eV 244.96 nm f=0.0150 |       |
| <TDDFT> Excited State 13: Singlet-A<br>4.8068 eV 257.94 nm f=0.2252 |       | <TDDFT>HOMO-2 -> LUMO+1                                             | 43.4% |
| <TDDFT>HOMO-2 -> LUMO                                               | 7.7%  | <TDDFT>HOMO-2 -> LUMO+2                                             | 17.8% |
| <TDDFT>HOMO -> LUMO+7                                               | 7.8%  | <TDDFT>HOMO-2 -> LUMO+7                                             | 3.3%  |
| <TDDFT>HOMO -> LUMO+10                                              | 63.7% | <TDDFT>HOMO-1 -> LUMO+3                                             | 8.3%  |
| <TDDFT>HOMO -> LUMO+13                                              | 11.3% | <TDDFT>HOMO-1 -> LUMO+4                                             | 10.3% |
| <TDDFT> Excited State 14: Singlet-A<br>4.9620 eV 249.87 nm f=0.0007 |       | <TDDFT>HOMO-1 -> LUMO+6                                             | 4.3%  |
| <TDDFT>HOMO-3 -> LUMO                                               | 16.3% | <TDDFT> Excited State 19: Singlet-A<br>5.0918 eV 243.50 nm f=0.0112 |       |
| <TDDFT>HOMO-2 -> LUMO+3                                             | 7.3%  | <TDDFT>HOMO-1 -> LUMO+1                                             | 2.1%  |
| <TDDFT>HOMO-2 -> LUMO+4                                             | 2.3%  | <TDDFT>HOMO -> LUMO+8                                               | 3.7%  |
| <TDDFT>HOMO-1 -> LUMO+1                                             | 59.5% | <TDDFT>HOMO -> LUMO+12                                              | 81.4% |
| <TDDFT>HOMO-1 -> LUMO+5                                             | 2.1%  | <TDDFT>HOMO -> LUMO+17                                              | 3.6%  |
| <TDDFT> Excited State 15: Singlet-A<br>4.9835 eV 248.79 nm f=0.1302 |       | <TDDFT> Excited State 20: Singlet-A<br>5.1433 eV 241.06 nm f=0.0003 |       |
| <TDDFT>HOMO-2 -> LUMO                                               | 2.5%  | <TDDFT>HOMO-5 -> LUMO                                               | 2.9%  |
| <TDDFT>HOMO -> LUMO+7                                               | 3.6%  | <TDDFT>HOMO-2 -> LUMO+1                                             | 44.4% |
| <TDDFT>HOMO -> LUMO+10                                              | 11.9% | <TDDFT>HOMO-2 -> LUMO+2                                             | 13.3% |
| <TDDFT>HOMO -> LUMO+13                                              | 48.3% | <TDDFT>HOMO-1 -> LUMO+3                                             | 28.1% |
| <TDDFT>HOMO -> LUMO+15                                              | 25.4% | <TDDFT>HOMO-1 -> LUMO+4                                             | 2.2%  |
| <TDDFT> Excited State 16: Singlet-A<br>5.0129 eV 247.33 nm f=0.0041 |       | <TDDFT> Excited State 21: Singlet-A<br>5.1708 eV 239.78 nm f=0.0522 |       |
| <TDDFT>HOMO -> LUMO+11                                              | 89.3% | <TDDFT>HOMO-4 -> LUMO+1                                             | 2.3%  |
| <TDDFT> Excited State 17: Singlet-A<br>5.0432 eV 245.85 nm f=0.0107 |       | <TDDFT>HOMO-3 -> LUMO                                               | 17.0% |
|                                                                     |       | <TDDFT>HOMO-2 -> LUMO+3                                             | 6.7%  |



|                                     |      |                                     |      |
|-------------------------------------|------|-------------------------------------|------|
| <TDDFT>HOMO-2 -> LUMO+4             | 2.6% | <TDDFT>HOMO -> LUMO+13              |      |
| <TDDFT>HOMO-2 -> LUMO+6             | 2.7% | 15.1%                               |      |
| <TDDFT>HOMO-1 -> LUMO+1             |      | <TDDFT>HOMO -> LUMO+15              |      |
| 13.9%                               |      | 39.9%                               |      |
| <TDDFT>HOMO-1 -> LUMO+2             |      | <TDDFT>HOMO -> LUMO+16              | 3.3% |
| 29.0%                               |      | <TDDFT>HOMO -> LUMO+22              | 5.5% |
| <TDDFT>HOMO-1 -> LUMO+5             | 2.6% | <TDDFT>HOMO -> LUMO+23              | 4.1% |
| <TDDFT>HOMO-1 -> LUMO+7             | 8.6% | <TDDFT> Excited State 24: Singlet-A |      |
| <TDDFT>HOMO -> LUMO+12              | 2.5% | 5.2833 eV 234.67 nm f=0.0110        |      |
| <TDDFT>HOMO -> LUMO+14              | 2.8% | <TDDFT>HOMO-6 -> LUMO+2             | 4.0% |
| <TDDFT> Excited State 22: Singlet-A |      | <TDDFT>HOMO-4 -> LUMO               | 7.4% |
| 5.1956 eV 238.63 nm f=0.0149        |      | <TDDFT>HOMO-4 -> LUMO+1             | 5.1% |
| <TDDFT>HOMO -> LUMO+9               | 3.9% | <TDDFT>HOMO-3 -> LUMO               |      |
| <TDDFT>HOMO -> LUMO+14              |      | 17.7%                               |      |
| 85.6%                               |      | <TDDFT>HOMO-3 -> LUMO+1             | 5.9% |
| <TDDFT> Excited State 23: Singlet-A |      | <TDDFT>HOMO-2 -> LUMO+3             |      |
| 5.2389 eV 236.66 nm f=0.0002        |      | 25.0%                               |      |
| <TDDFT>HOMO-5 -> LUMO               | 2.0% | <TDDFT>HOMO-2 -> LUMO+4             | 4.4% |
| <TDDFT>HOMO-2 -> LUMO+2             | 5.4% | <TDDFT>HOMO-2 -> LUMO+6             | 5.3% |
| <TDDFT>HOMO-1 -> LUMO+3             | 6.0% | <TDDFT>HOMO-1 -> LUMO+1             | 3.9% |
| <TDDFT>HOMO-1 -> LUMO+4             | 4.2% | <TDDFT>HOMO-1 -> LUMO+2             | 4.8% |
| <TDDFT>HOMO -> LUMO+10              | 3.0% | <TDDFT>HOMO-1 -> LUMO+7             | 2.5% |

#### 6.1.4.6 Minimum geometry of excited state of native BBTT under IEFPCM variation of PCM

(PBE1PBE/6-311++G\*\*, IEFPCM CH<sub>2</sub>Cl<sub>2</sub>)

|                                       |           |           |           |           |           |           |           |
|---------------------------------------|-----------|-----------|-----------|-----------|-----------|-----------|-----------|
| #p opt td=(nstates=4) PBE1PBE/6-      | C 0       | -1.329280 | -1.261535 | -0.058642 |           |           |           |
| 311++g(d,p) freq                      | C 0       | -1.185279 | 0.143979  | -0.158161 |           |           |           |
| scrf=(iefpcm,solvent=dichloromethane) | N 0       | -0.000000 | 0.808888  | -0.185228 |           |           |           |
| geom=check guess=read                 | C 0       | -2.688684 | -1.676071 | -0.038312 |           |           |           |
| 0 1                                   | C 0       | -3.576580 | -0.573444 | -0.114776 |           |           |           |
| C 0                                   | 5.475218  | -2.026254 | -0.030038 | C 0       | -3.576580 | -0.573444 | -0.114776 |
| C 0                                   | 4.618362  | -3.127361 | 0.044921  | S 0       | -2.728861 | 0.972553  | -0.212294 |
| C 0                                   | 3.241415  | -2.968910 | 0.041452  | C 0       | -3.241415 | -2.968910 | 0.041452  |
| C 0                                   | 2.688683  | -1.676071 | -0.038313 | C 0       | -4.618363 | -3.127361 | 0.044921  |
| C 0                                   | 3.576580  | -0.573445 | -0.114776 | C 0       | -5.475218 | -2.026254 | -0.030039 |
| C 0                                   | 4.950911  | -0.734082 | -0.111809 | C 0       | -4.950912 | -0.734082 | -0.111809 |
| C 0                                   | 1.329279  | -1.261535 | -0.058642 | C 0       | 0.000000  | 2.248881  | -0.184369 |
| C 0                                   | 1.185279  | 0.143979  | -0.158161 | C 0       | 0.000001  | 2.923851  | 1.040713  |
| S 0                                   | 2.728861  | 0.972553  | -0.212295 | C 0       | 0.000000  | 4.317915  | 0.988105  |
| S 0                                   | -0.000000 | -2.340126 | 0.085118  | C 0       | 0.000000  | 4.998578  | -0.224652 |

|     |           |           |           |                                         |           |          |           |
|-----|-----------|-----------|-----------|-----------------------------------------|-----------|----------|-----------|
| C 0 | -0.000000 | 4.298739  | -1.425812 | H 0                                     | -0.000000 | 4.827192 | -2.372562 |
| C 0 | -0.000000 | 2.910121  | -1.406294 | H 0                                     | -0.000000 | 2.333981 | -2.325287 |
| C 0 | 0.000001  | 2.182286  | 2.342347  | H 0                                     | -0.881189 | 1.538815 | 2.429992  |
| H 0 | 6.550006  | -2.170022 | -0.025297 | H 0                                     | 0.881192  | 1.538815 | 2.429991  |
| H 0 | 5.036680  | -4.126934 | 0.106659  | H 0                                     | 0.000002  | 2.878845 | 3.181739  |
| H 0 | 2.592566  | -3.837384 | 0.099020  | SCF Done: E(RPBE1PBE) = -               |           |          |           |
| H 0 | 5.610004  | 0.125719  | -0.170790 | 2133.53993211                           |           |          |           |
| H 0 | -2.592566 | -3.837384 | 0.099020  | Sum of electronic and zero-point        |           |          |           |
| H 0 | -5.036680 | -4.126934 | 0.106658  | Energies=                               |           |          |           |
| H 0 | -6.550006 | -2.170021 | -0.025298 | -2133.149497                            |           |          |           |
| H 0 | -5.610004 | 0.125719  | -0.170790 | Sum of electronic and thermal Energies= |           |          |           |
| H 0 | 0.000001  | 4.876021  | 1.919221  | -2133.126527                            |           |          |           |
| H 0 | 0.000000  | 6.083591  | -0.229980 | Sum of electronic and thermal           |           |          |           |
|     |           |           |           | Enthalpies=                             |           |          |           |
|     |           |           |           | -2133.125583                            |           |          |           |
|     |           |           |           | Sum of electronic and thermal Free      |           |          |           |
|     |           |           |           | Energies=                               |           |          |           |
|     |           |           |           | -2133.204208                            |           |          |           |

6.1.4.7 TD-DFT calculation of excited state of native BBTT under IEFPCM variation of PCM (PBE1PBE/6-311++G\*\*, IEFPCM CH<sub>2</sub>Cl<sub>2</sub>)

|                                                                                                              |                                                                    |
|--------------------------------------------------------------------------------------------------------------|--------------------------------------------------------------------|
| #p opt td=(nstates=4) PBE1PBE/6-311++g(d,p) freq scrf=(iefpcm,solvent=dichloromethane) geom=check guess=read | <TDDFT> Excited State 3: Singlet-A<br>3.2658 eV 379.64 nm f=0.0000 |
| <TDDFT> Excited State 1: Singlet-A<br>2.1923 eV 565.53 nm f=0.1246                                           | <TDDFT>HOMO -> LUMO+2<br>96.7%                                     |
| <TDDFT>HOMO -> LUMO<br>98.3%                                                                                 | <TDDFT> Excited State 4: Singlet-A<br>3.4058 eV 364.04 nm f=0.0045 |
| <TDDFT> Excited State 2: Singlet-A<br>2.9524 eV 419.94 nm f=0.0013                                           | <TDDFT>HOMO -> LUMO+3<br>54.7%                                     |
| <TDDFT>HOMO -> LUMO+1<br>98.5%                                                                               | <TDDFT>HOMO -> LUMO+5<br>29.0%                                     |
|                                                                                                              | <TDDFT>HOMO -> LUMO+6<br>13.5%                                     |

6.1.4.8 Minimum geometry of native BBTT under SMD variation of PCM (B3LYP/6-311++G\*\*, SMD CH<sub>2</sub>Cl<sub>2</sub>)

|                                                         |          |           |           |           |           |           |           |
|---------------------------------------------------------|----------|-----------|-----------|-----------|-----------|-----------|-----------|
| Conformer I:                                            | C 0      | 3.531566  | -0.657162 | -0.442638 |           |           |           |
| #p opt=tight freq=noraman rb3lyp/6-311++g(d,p) pop=full | C 0      | 4.880108  | -0.902878 | -0.693310 |           |           |           |
| scrf=(SMD,solvent=dichloromethane)                      | C 0      | 1.335051  | -1.162670 | 0.265138  |           |           |           |
| geom=check guess=read                                   | C 0      | 1.190207  | 0.154011  | -0.055024 |           |           |           |
| 0 1                                                     | S 0      | 2.685271  | 0.874389  | -0.669210 |           |           |           |
| C 0                                                     | 5.370397 | -2.186769 | -0.468608 | S 0       | -0.000107 | -2.125271 | 0.967064  |
| C 0                                                     | 4.524156 | -3.202809 | 0.001736  | C 0       | -1.335121 | -1.162662 | 0.264877  |
| C 0                                                     | 3.182319 | -2.953346 | 0.260102  | C 0       | -1.190209 | 0.154022  | -0.055246 |
| C 0                                                     | 2.663564 | -1.666023 | 0.039334  | N 0       | -0.000001 | 0.879107  | -0.020733 |

C O -2.663593 -1.666006 0.038816  
 C O -3.531501 -0.657131 -0.443298  
 S O -2.685157 0.874419 -0.669691  
 C O -3.182397 -2.953330 0.259461  
 C O -4.524185 -3.202783 0.000832  
 C O -5.370333 -2.186729 -0.469653  
 C O -4.879996 -0.902835 -0.694233  
 C O 0.000004 2.323597 -0.007462  
 C O -0.000035 3.003536 1.223126  
 C O -0.000029 4.402050 1.184027  
 C O 0.000010 5.097144 -0.025025  
 C O 0.000048 4.404110 -1.233377  
 C O 0.000046 3.010664 -1.222382  
 C O -0.000079 2.260043 2.532798  
 H O 6.415219 -2.400812 -0.662367  
 H O 4.924148 -4.196776 0.168092  
 H O 2.538401 -3.745887 0.625153  
 H O 5.532344 -0.117770 -1.058882  
 H O -2.538553 -3.745884 0.624617  
 H O -4.924213 -4.196752 0.167089  
 H O -6.415118 -2.400766 -0.663620  
 H O -5.532157 -0.117717 -1.059918  
 H O -0.000057 4.951643 2.119519  
 H O 0.000012 6.181754 -0.020782  
 H O 0.000080 4.938537 -2.176308  
 H O 0.000079 2.451414 -2.151188  
 H O -0.879846 1.616287 2.626563  
 H O 0.879669 1.616269 2.626610  
 H O -0.000095 2.959855 3.369981  
 SCF Done: E(RB3LYP) = -  
 2135.13751008  
 Sum of electronic and zero-point  
 Energies= -2134.826212  
 Sum of electronic and thermal Energies=  
 -2134.804308  
 Sum of electronic and thermal  
 Enthalpies= -2134.803364  
 Sum of electronic and thermal Free  
 Energies= -2134.877863

Conformer II:  
 #p opt=tight freq=noraman rb3lyp/6-  
 311++g(d,p) pop=full  
 scrf=(SMD,solvent=dichloromethane)  
 geom=check guess=read  
 0 1  
 C O 5.440795 -2.091250 0.321353  
 C O 4.584857 -3.176899 0.080820  
 C O 3.222996 -2.985130 -0.115788  
 C O 2.693464 -1.683481 -0.066801  
 C O 3.573797 -0.603170 0.180579  
 C O 4.940611 -0.792386 0.371256  
 C O 1.339704 -1.237573 -0.258341  
 C O 1.192727 0.112850 -0.139867  
 S O 2.715604 0.936267 0.213480  
 S O 0.000000 -2.340002 -0.699089  
 C O -1.339704 -1.237573 -0.258341  
 C O -1.192727 0.112850 -0.139867  
 N O -0.000000 0.830685 -0.205778  
 C O -2.693464 -1.683482 -0.066801  
 C O -3.573797 -0.603170 0.180580  
 S O -2.715604 0.936267 0.213480  
 C O -3.222996 -2.985131 -0.115788  
 C O -4.584857 -3.176900 0.080821  
 C O -5.440794 -2.091251 0.321353  
 C O -4.940611 -0.792387 0.371256  
 C O -0.000000 2.271415 -0.316019  
 C O -0.000000 3.077687 0.833807  
 C O -0.000001 4.468018 0.639872  
 C O -0.000001 5.028539 -0.632178  
 C O -0.000001 4.207546 -1.762085  
 C O -0.000001 2.828263 -1.599820  
 C O 0.000001 2.520566 2.235559  
 H O 6.500771 -2.261572 0.470753  
 H O 4.992582 -4.180949 0.046382  
 H O 2.573962 -3.833769 -0.302039  
 H O 5.599734 0.047743 0.558338  
 H O -2.573961 -3.833769 -0.302039

H O -4.992581 -4.180950 0.046383  
H O -6.500771 -2.261573 0.470753  
H O -5.599734 0.047742 0.558338  
H O -0.000000 5.115134 1.511099  
H O -0.000001 6.107182 -0.744481  
H O -0.000002 4.638488 -2.756560  
H O -0.000001 2.166381 -2.458453  
H O 0.000000 1.431327 2.254578  
H O 0.880700 2.867781 2.784047

H O -0.880697 2.867782 2.784049  
SCF Done: E(RB3LYP) = -  
2135.13544694  
Sum of electronic and zero-point  
Energies= -2134.824337  
Sum of electronic and thermal Energies=  
-2134.802312  
Sum of electronic and thermal  
Enthalpies= -2134.801368  
Sum of electronic and thermal Free  
Energies= -2134.877383

#### 6.1.4.9 Minimum geometry of radical cation of BBTT in gas phase (B3LYP/6-311++G\*\*)

#p ub3lyp/6-311++g(d,p) opt=loose  
freq=noraman scf=maxcycle=1000  
geom=check guess=read  
0 1  
C O 5.479982 -2.022887 -0.041112  
C O 4.627774 -3.136056 0.027380  
C O 3.251971 -2.977261 0.033436  
C O 2.712131 -1.680626 -0.029036  
C O 3.586851 -0.572880 -0.097212  
C O 4.969078 -0.730552 -0.105141  
C O 1.337860 -1.262942 -0.035212  
C O 1.192417 0.115946 -0.106637  
S O 2.720714 0.964949 -0.176234  
S O -0.000003 -2.381419 0.047456  
C O -1.337864 -1.262941 -0.035215  
C O -1.192420 0.115949 -0.106635  
N O -0.000001 0.799830 -0.123013  
C O -2.712135 -1.680622 -0.029034  
C O -3.586854 -0.572874 -0.097200  
S O -2.720715 0.964953 -0.176218  
C O -3.251978 -2.977257 0.033431  
C O -4.627780 -3.136050 0.027378  
C O -5.479987 -2.022879 -0.041105  
C O -4.969082 -0.730544 -0.105126  
C O -0.000000 2.258115 -0.173445  
C O 0.000017 2.984387 1.026936  
C O 0.000018 4.378581 0.909841

C O 0.000000 5.007513 -0.332755  
C O -0.000019 4.255991 -1.506138  
C O -0.000019 2.867820 -1.427393  
C O 0.000038 2.312169 2.376354  
H O 6.553212 -2.169632 -0.045190  
H O 5.052543 -4.131034 0.075544  
H O 2.603285 -3.844241 0.085612  
H O 5.631865 0.124345 -0.159306  
H O -2.603293 -3.844238 0.085600  
H O -5.052551 -4.131027 0.075536  
H O -6.553218 -2.169621 -0.045180  
H O -5.631868 0.124354 -0.159284  
H O 0.000032 4.977794 1.813243  
H O 0.000002 6.089883 -0.384291  
H O -0.000033 4.742962 -2.473326  
H O -0.000032 2.259571 -2.324451  
H O 0.882442 1.680144 2.512609  
H O -0.000007 3.055564 3.173149  
H O -0.882303 1.680052 2.512591  
SCF Done: E(UB3LYP) = -  
2134.88741231  
Sum of electronic and zero-point  
Energies= -2134.575442  
Sum of electronic and thermal Energies=  
-2134.553485  
Sum of electronic and thermal  
Enthalpies= -2134.552541

Sum of electronic and thermal Free  
Energies= -2134.628090

#### 6.1.4.10 Minimum geometry of radical cation of BBTT under IEFPCM variation of PCM

(B3LYP/6-311++G\*\*, IEFPCM CH<sub>2</sub>Cl<sub>2</sub>)

```
#p ub3lyp/6-311++g(d,p) opt=verytight
int=ultrafine freq=noraman
scf=maxcycle=1000
scrf=(iefpcm,solvent=dichloromethane)
0 1
C O 5.479780 -2.020926 -0.036582
C O 4.627067 -3.134361 0.028375
C O 3.250377 -2.975768 0.032876
C O 2.710931 -1.679181 -0.028660
C O 3.585284 -0.571063 -0.094113
C O 4.968404 -0.728407 -0.099027
C O 1.335519 -1.263065 -0.036033
C O 1.191041 0.115075 -0.105256
S O 2.718405 0.965288 -0.172613
S O 0.000160 -2.381997 0.035828
C O -1.335304 -1.263204 -0.036410
C O -1.190995 0.114940 -0.105918
N O 0.000011 0.798659 -0.122205
C O -2.710654 -1.679517 -0.029003
C O -3.585131 -0.571523 -0.094790
S O -2.718504 0.964913 -0.173545
C O -3.249948 -2.976144 0.033070
C O -4.626616 -3.134885 0.028750
C O -5.479466 -2.021566 -0.036547
C O -4.968246 -0.729025 -0.099541
C O -0.000204 2.255773 -0.173998
C O -0.002361 2.983671 1.025506
C O -0.002617 4.377969 0.906634
C O -0.000337 5.005048 -0.337433
C O 0.001411 4.251369 -1.509797
C O 0.001261 2.862847 -1.428830
C O -0.000258 2.313497 2.375290
H O 6.553116 -2.167053 -0.038607
H O 5.051054 -4.129812 0.075689
H O 2.601249 -3.842046 0.083240
H O 5.629949 0.127350 -0.149711
H O -2.600722 -3.842329 0.083760
H O -5.050494 -4.130361 0.076510
H O -6.552786 -2.167814 -0.038385
H O -5.629889 0.126645 -0.150432
H O -0.004888 4.978049 1.809380
H O -0.000680 6.087446 -0.390373
H O 0.002504 4.735990 -2.478143
H O 0.002148 2.251540 -2.323239
H O 0.912570 1.731363 2.531661
H O -0.060655 3.058218 3.168639
H O -0.847180 1.631583 2.489348
SCF Done: E(UB3LYP) = -
2134.93771925
Sum of electronic and zero-point
Energies= -2134.625756
Sum of electronic and thermal Energies=
-2134.603785
Sum of electronic and thermal
Enthalpies= -2134.602841
Sum of electronic and thermal Free
Energies= -2134.678469
```

#### 6.1.4.11 Minimum geometry of radical cation of BBTT under SMD variation of PCM

(B3LYP/6-311++G\*\*, SMD CH<sub>2</sub>Cl<sub>2</sub>)

```
#p ub3lyp/6-311++g(d,p) opt
freq=noraman scf=maxcycle=1000
scrf=(SMD,solvent=dichloromethane)
0 1
C O 5.476193 -2.031474 -0.057648
C O 4.620559 -3.142550 0.010163
C O 3.244378 -2.980272 0.027139
```

|     |           |           |           |                                         |           |           |           |
|-----|-----------|-----------|-----------|-----------------------------------------|-----------|-----------|-----------|
| C 0 | 2.709610  | -1.681100 | -0.024307 | H 0                                     | 6.549255  | -2.181560 | -0.068841 |
| C 0 | 3.587064  | -0.575941 | -0.095063 | H 0                                     | 5.042047  | -4.139752 | 0.049686  |
| C 0 | 4.969440  | -0.736379 | -0.112198 | H 0                                     | 2.593629  | -3.846013 | 0.078772  |
| C 0 | 1.336164  | -1.260619 | -0.019392 | H 0                                     | 5.635190  | 0.116755  | -0.165609 |
| C 0 | 1.190257  | 0.117106  | -0.084806 | H 0                                     | -2.593753 | -3.845934 | 0.078783  |
| S 0 | 2.721531  | 0.963591  | -0.164087 | H 0                                     | -5.042186 | -4.139610 | 0.049674  |
| S 0 | -0.000047 | -2.379216 | 0.062979  | H 0                                     | -6.549336 | -2.181372 | -0.068812 |
| C 0 | -1.336222 | -1.260583 | -0.019403 | H 0                                     | -5.635219 | 0.116909  | -0.165536 |
| C 0 | -1.190278 | 0.117146  | -0.084849 | H 0                                     | 0.000225  | 5.011739  | 1.772782  |
| N 0 | 0.000000  | 0.801268  | -0.093580 | H 0                                     | 0.000149  | 6.085406  | -0.447197 |
| C 0 | -2.709679 | -1.681020 | -0.024283 | H 0                                     | 0.000014  | 4.698642  | -2.512593 |
| C 0 | -3.587100 | -0.575831 | -0.095023 | H 0                                     | -0.000073 | 2.216071  | -2.316306 |
| S 0 | -2.721524 | 0.963655  | -0.164073 | H 0                                     | 0.881214  | 1.731551  | 2.534098  |
| C 0 | -3.244482 | -2.980179 | 0.027143  | H 0                                     | 0.000135  | 3.127370  | 3.161787  |
| C 0 | -4.620667 | -3.142421 | 0.010171  | H 0                                     | -0.880919 | 1.731542  | 2.534155  |
| C 0 | -5.476269 | -2.031319 | -0.057618 | SCF Done: E(UB3LYP) = -                 |           |           |           |
| C 0 | -4.969483 | -0.736238 | -0.112157 | 2134.96539898                           |           |           |           |
| C 0 | 0.000029  | 2.258386  | -0.165852 | Sum of electronic and zero-point        |           |           |           |
| C 0 | 0.000102  | 3.005675  | 1.022350  | Energies= -2134.653590                  |           |           |           |
| C 0 | 0.000161  | 4.398087  | 0.878847  | Sum of electronic and thermal Energies= |           |           |           |
| C 0 | 0.000120  | 5.003607  | -0.375881 | -2134.631758                            |           |           |           |
| C 0 | 0.000031  | 4.230258  | -1.535796 | Sum of electronic and thermal           |           |           |           |
| C 0 | -0.000016 | 2.843210  | -1.432039 | Enthalpies= -2134.630814                |           |           |           |
| C 0 | 0.000132  | 2.362603  | 2.384355  | Sum of electronic and thermal Free      |           |           |           |
|     |           |           |           | Energies= -2134.705727                  |           |           |           |

#### 6.1.4.12 Transition state of native BBTT under IEFPCM variation of PCM (B3LYP/6-311G\*\*,

##### IEFPCM CH<sub>2</sub>Cl<sub>2</sub>)

```
#p opt=qst2 freq=noraman b3lyp/6-311g**
scrf=(iefpcm,solvent=dichloromethane)
0 1
```

|     |          |           |           |     |           |           |           |
|-----|----------|-----------|-----------|-----|-----------|-----------|-----------|
| C 0 | 5.435800 | -2.064830 | 0.346222  | S 0 | 2.710998  | 0.956032  | 0.125465  |
| C 0 | 4.582331 | -3.157697 | 0.134958  | S 0 | 0.005927  | -2.347008 | -0.714605 |
| C 0 | 3.222906 | -2.972582 | -0.076419 | C 0 | -1.334983 | -1.241331 | -0.286227 |
| C 0 | 2.692958 | -1.670956 | -0.072404 | C 0 | -1.194324 | 0.112033  | -0.209877 |
| C 0 | 3.570220 | -0.582722 | 0.146357  | N 0 | -0.002567 | 0.831120  | -0.303024 |
| C 0 | 4.935199 | -0.766302 | 0.351710  | C 0 | -2.683834 | -1.685543 | -0.066708 |
| C 0 | 1.340523 | -1.233968 | -0.284326 | C 0 | -3.565735 | -0.601944 | 0.156500  |
| C 0 | 1.192586 | 0.118447  | -0.205330 | S 0 | -2.715389 | 0.941766  | 0.131391  |
|     |          |           |           | C 0 | -3.206379 | -2.990180 | -0.066470 |
|     |          |           |           | C 0 | -4.563444 | -3.182714 | 0.152893  |
|     |          |           |           | C 0 | -5.421844 | -2.094383 | 0.367886  |

|     |           |           |           |                                         |           |          |           |
|-----|-----------|-----------|-----------|-----------------------------------------|-----------|----------|-----------|
| C 0 | -4.928590 | -0.793091 | 0.369367  | H 0                                     | -0.004743 | 4.998777 | 1.674032  |
| C 0 | -0.010216 | 2.274396  | -0.326190 | H 0                                     | -0.054200 | 6.127877 | -0.515049 |
| C 0 | 0.006295  | 3.009464  | 0.871709  | H 0                                     | -0.082183 | 4.787592 | -2.611910 |
| C 0 | -0.011210 | 4.406679  | 0.765245  | H 0                                     | -0.058299 | 2.302000 | -2.467656 |
| C 0 | -0.040316 | 5.044893  | -0.470052 | H 0                                     | -0.343818 | 1.346004 | 2.223173  |
| C 0 | -0.056634 | 4.296453  | -1.646621 | H 0                                     | 1.094888  | 2.294323 | 2.586197  |
| C 0 | -0.043079 | 2.909303  | -1.570519 | H 0                                     | -0.500340 | 2.946444 | 2.958566  |
| C 0 | 0.061507  | 2.357424  | 2.231398  | SCF Done: E(RB3LYP) = -                 |           |          |           |
| H 0 | 6.494518  | -2.229697 | 0.507430  | 2135.09696437                           |           |          |           |
| H 0 | 4.990624  | -4.161745 | 0.135437  | Sum of electronic and zero-point        |           |          |           |
| H 0 | 2.571613  | -3.823991 | -0.238116 | Energies= -2134.785833                  |           |          |           |
| H 0 | 5.592078  | 0.079679  | 0.516212  | Sum of electronic and thermal Energies= |           |          |           |
| H 0 | -2.551125 | -3.837995 | -0.231011 | -2134.764501                            |           |          |           |
| H 0 | -4.966095 | -4.189032 | 0.156788  | Sum of electronic and thermal           |           |          |           |
| H 0 | -6.478661 | -2.265085 | 0.535380  | Enthalpies= -2134.763557                |           |          |           |
| H 0 | -5.589294 | 0.049275  | 0.537072  | Sum of electronic and thermal Free      |           |          |           |
|     |           |           |           | Energies= -2134.837566                  |           |          |           |

## 6.1.5 *anti-anti-N-ortho*-methoxyphenyl-BBTT 3e

### 6.1.5.1 Minimum geometry of native BBTT in gas phase (B3LYP/6-311++G\*\*)

|                                          |           |           |           |           |           |           |           |
|------------------------------------------|-----------|-----------|-----------|-----------|-----------|-----------|-----------|
| Conformer I:                             | S 0       | -2.696899 | 0.702665  | -0.955562 |           |           |           |
| #p opt freq=noraman rb3lyp/6-311++g(d,p) | C 0       | -3.194744 | -2.988344 | 0.406896  |           |           |           |
| pop=full                                 | C 0       | -4.543035 | -3.254319 | 0.211068  |           |           |           |
| 0 1                                      | C 0       | -5.393834 | -2.290708 | -0.349827 |           |           |           |
| C 0                                      | 5.393485  | -2.291213 | -0.350344 | C 0       | -4.900993 | -1.045401 | -0.727791 |
| C 0                                      | 4.542664  | -3.254784 | 0.210562  | C 0       | 0.000060  | 2.192687  | -0.354147 |
| C 0                                      | 3.194421  | -2.988656 | 0.406643  | C 0       | 0.000349  | 2.843818  | 0.897864  |
| C 0                                      | 2.674077  | -1.739139 | 0.032837  | C 0       | 0.000385  | 4.240509  | 0.937547  |
| C 0                                      | 3.545919  | -0.783271 | -0.539609 | C 0       | 0.000104  | 4.971340  | -0.251445 |
| C 0                                      | 4.900747  | -1.045800 | -0.728084 | C 0       | -0.000210 | 4.331451  | -1.485695 |
| C 0                                      | 1.335555  | -1.229485 | 0.166831  | C 0       | -0.000233 | 2.937122  | -1.528258 |
| C 0                                      | 1.192847  | 0.039588  | -0.302719 | O 0       | 0.000526  | 2.037073  | 1.984306  |
| S 0                                      | 2.696819  | 0.702450  | -0.955470 | C 0       | 0.001004  | 2.625091  | 3.281478  |
| S 0                                      | -0.000130 | -2.142400 | 0.924180  | H 0       | 6.443632  | -2.516771 | -0.494809 |
| C 0                                      | -1.335721 | -1.229406 | 0.166735  | H 0       | 4.944107  | -4.220575 | 0.495527  |
| C 0                                      | -1.192880 | 0.039649  | -0.302812 | H 0       | 2.542176  | -3.739152 | 0.838640  |
| N 0                                      | -0.000003 | 0.758541  | -0.406478 | H 0       | 5.556153  | -0.301095 | -1.164866 |
| C 0                                      | -2.674299 | -1.738924 | 0.032879  | H 0       | -2.542482 | -3.738904 | 0.838765  |
| C 0                                      | -3.546114 | -0.783022 | -0.539525 |           |           |           |           |

H O -4.944578 -4.219991 0.496228  
 H O -6.444034 -2.516161 -0.494083  
 H O -5.556365 -0.300684 -1.164564  
 H O 0.000604 4.763083 1.884616  
 H O 0.000130 6.054491 -0.202291  
 H O -0.000434 4.904633 -2.404488  
 H O -0.000451 2.409319 -2.474976  
 H O 0.001235 1.790866 3.980028  
 H O 0.896674 3.234198 3.439837  
 H O -0.894530 3.234234 3.440476  
 SCF Done: E(RB3LYP) = -  
 2210.33289189  
 Sum of electronic and zero-point  
 Energies= -2210.016485  
 Sum of electronic and thermal Energies=  
 -2209.993563  
 Sum of electronic and thermal  
 Enthalpies= -2209.992618  
 Sum of electronic and thermal Free  
 Energies= -2210.070487  
 Conformer II:  
 #p opt freq=noraman rb3lyp/6-311++g(d,p)  
 pop=full  
 0 1  
 C O 5.405909 -2.165118 0.446123  
 C O 4.550997 -3.266490 0.293773  
 C O 3.198790 -3.090734 0.033144  
 C O 2.677683 -1.790753 -0.074410  
 C O 3.554915 -0.692973 0.088548  
 C O 4.912651 -0.867730 0.343661  
 C O 1.333962 -1.365280 -0.355942  
 C O 1.193140 -0.010778 -0.379489  
 S O 2.705625 0.841953 -0.065652  
 S O -0.000009 -2.491818 -0.735012  
 C O -1.333828 -1.365225 -0.355831  
 C O -1.192998 -0.010711 -0.379348  
 N O 0.000100 0.691504 -0.584754  
 C O -2.677649 -1.790645 -0.074707  
 C O -3.554928 -0.692870 0.087881

S O -2.705553 0.842044 -0.066159  
 C O -3.198829 -3.090657 0.032798  
 C O -4.550940 -3.266402 0.293275  
 C O -5.405935 -2.165034 0.445358  
 C O -4.912709 -0.867643 0.342811  
 C O 0.000230 2.124884 -0.643118  
 C O -0.000487 2.882991 0.547932  
 C O -0.000298 4.279084 0.463789  
 C O 0.000753 4.902608 -0.783277  
 C O 0.001617 4.156321 -1.957584  
 C O 0.001342 2.765489 -1.877859  
 O O -0.001201 2.179020 1.703569  
 C O -0.001794 2.882578 2.941896  
 H O 6.459054 -2.322604 0.646894  
 H O 4.952525 -4.269752 0.379973  
 H O 2.543967 -3.947204 -0.080232  
 H O 5.570726 -0.014790 0.463568  
 H O -2.543925 -3.947115 -0.080311  
 H O -4.952481 -4.269655 0.379573  
 H O -6.459234 -2.322520 0.645985  
 H O -5.570902 -0.014709 0.462452  
 H O -0.000889 4.881835 1.361822  
 H O 0.000906 5.985893 -0.829252  
 H O 0.002488 4.647044 -2.922950  
 H O 0.001949 2.154323 -2.772738  
 H O -0.002268 2.115801 3.713823  
 H O 0.893959 3.503139 3.044828  
 H O -0.897546 3.503294 3.043900  
 SCF Done: E(RB3LYP) = -  
 2210.33189974  
 Sum of electronic and zero-point  
 Energies= -2210.015672  
 Sum of electronic and thermal Energies=  
 -2209.992704  
 Sum of electronic and thermal  
 Enthalpies= -2209.991760  
 Sum of electronic and thermal Free  
 Energies= -2210.069766



### 6.1.5.2 Minimum geometry of native BBT under IEFPCM variation of PCM

(B3LYP/6-311++G\*\*, IEFPCM CH<sub>2</sub>Cl<sub>2</sub>)

```

Conformer I:
#p opt freq=noraman rb3lyp/6-311++g(d,p)
scrf=(iefpcm,solvent=dichloromethane)
pop=full geom=check guess=read
  0 1
C 0  5.399623 -2.292874 -0.355132
C 0  4.549870 -3.271498  0.182669
C 0  3.199615 -3.013517  0.382216
C 0  2.676771 -1.756526  0.034626
C 0  3.548392 -0.785055 -0.512928
C 0  4.904693 -1.039306 -0.705582
C 0  1.336859 -1.252512  0.175975
C 0  1.191962  0.028270 -0.263683
S 0  2.696475  0.710273 -0.894185
S 0  0.000050 -2.183058  0.915004
C 0 -1.336779 -1.252574  0.175937
C 0 -1.191927  0.028214 -0.263720
N 0  0.000002  0.747151 -0.344966
C 0 -2.676672 -1.756635  0.034579
C 0 -3.548324 -0.785194 -0.512980
S 0 -2.696443  0.710138 -0.894302
C 0 -3.199479 -3.013635  0.382189
C 0 -4.549727 -3.271657  0.182655
C 0 -5.399512 -2.293064 -0.355153
C 0 -4.904620 -1.039485 -0.705618
C 0 -0.000036  2.183285 -0.354408
C 0 -0.000109  2.884107  0.870627
C 0 -0.000149  4.282134  0.850733
C 0 -0.000112  4.961534 -0.368368
C 0 -0.000039  4.270631 -1.576419
C 0 -0.000002  2.876015 -1.561128
O 0 -0.000132  2.126001  1.992113
C 0 -0.000242  2.779027  3.265944
H 0  6.450710 -2.512004 -0.501956
H 0  4.953361 -4.242016  0.447811
H 0  2.550914 -3.775608  0.799114
H 0  5.559281 -0.283269 -1.123143
H 0 -2.550754 -3.775701  0.799097
H 0 -4.953190 -4.242184  0.447812
H 0 -6.450593 -2.512227 -0.501972
H 0 -5.559230 -0.283475 -1.123194
H 0 -0.000206  4.844795  1.774271
H 0 -0.000143  6.045634 -0.364279
H 0 -0.000011  4.804946 -2.518256
H 0  0.000050  2.310546 -2.485826
H 0 -0.000259  1.979512  4.003268
H 0  0.895137  3.393649  3.391388
H 0 -0.895684  3.393580  3.391269
SCF Done: E(RB3LYP) = -
2210.34223081
Sum of electronic and zero-point
Energies=      -2210.025957
Sum of electronic and thermal Energies=
-2210.003009
Sum of electronic and thermal
Enthalpies=      -2210.002065
Sum of electronic and thermal Free
Energies=      -2210.079986
Conformer II:
#p opt freq=noraman rb3lyp/6-311++g(d,p)
scrf=(iefpcm,solvent=dichloromethane)
pop=full geom=check guess=read
  0 1
C 0  5.429356 -2.145858  0.401488
C 0  4.574286 -3.252925  0.289866
C 0  3.215297 -3.086142  0.055180
C 0  2.688232 -1.788844 -0.067171
C 0  3.566802 -0.685693  0.051918
C 0  4.930596 -0.850989  0.282355
C 0  1.336716 -1.371149 -0.323635
C 0  1.192233 -0.016775 -0.375071
S 0  2.710523  0.844540 -0.119776

```

|     |           |           |           |                                         |           |           |           |
|-----|-----------|-----------|-----------|-----------------------------------------|-----------|-----------|-----------|
| S 0 | -0.000012 | -2.516268 | -0.641740 | H 0                                     | 5.588344  | 0.005781  | 0.370769  |
| C 0 | -1.336726 | -1.371137 | -0.323624 | H 0                                     | -2.563298 | -3.948309 | -0.027926 |
| C 0 | -1.192235 | -0.016764 | -0.375064 | H 0                                     | -4.980511 | -4.253167 | 0.387515  |
| N 0 | 0.000001  | 0.684931  | -0.570949 | H 0                                     | -6.487039 | -2.296344 | 0.583160  |
| C 0 | -2.688247 | -1.788823 | -0.067172 | H 0                                     | -5.588352 | 0.005822  | 0.370739  |
| C 0 | -3.566812 | -0.685666 | 0.051904  | H 0                                     | 0.000009  | 4.870715  | 1.388177  |
| S 0 | -2.710522 | 0.844560  | -0.119792 | H 0                                     | 0.000055  | 5.979851  | -0.798557 |
| C 0 | -3.215321 | -3.086117 | 0.055185  | H 0                                     | 0.000079  | 4.648171  | -2.898540 |
| C 0 | -4.574313 | -3.252890 | 0.289861  | H 0                                     | 0.000049  | 2.156275  | -2.758159 |
| C 0 | -5.429377 | -2.145818 | 0.401471  | H 0                                     | -0.000024 | 2.108864  | 3.739628  |
| C 0 | -4.930608 | -0.850952 | 0.282335  | H 0                                     | 0.895424  | 3.494445  | 3.066145  |
| C 0 | 0.000013  | 2.120888  | -0.625400 | H 0                                     | -0.895446 | 3.494458  | 3.066137  |
| C 0 | 0.000003  | 2.873065  | 0.569590  | SCF Done: E(RB3LYP) = -                 |           |           |           |
| C 0 | 0.000016  | 4.269960  | 0.489071  | 2210.34142489                           |           |           |           |
| C 0 | 0.000044  | 4.896565  | -0.756576 | Sum of electronic and zero-point        |           |           |           |
| C 0 | 0.000057  | 4.154160  | -1.934937 | Energies= -2210.025311                  |           |           |           |
| C 0 | 0.000041  | 2.763114  | -1.860287 | Sum of electronic and thermal Energies= |           |           |           |
| O 0 | -0.000014 | 2.166703  | 1.723887  | -2210.002325                            |           |           |           |
| C 0 | -0.000015 | 2.875108  | 2.967818  | Sum of electronic and thermal           |           |           |           |
| H 0 | 6.487016  | -2.296391 | 0.583183  | Enthalpies= -2210.001381                |           |           |           |
| H 0 | 4.980477  | -4.253205 | 0.387516  | Sum of electronic and thermal Free      |           |           |           |
| H 0 | 2.563269  | -3.948329 | -0.027941 | Energies= -2210.079561                  |           |           |           |

### 6.1.5.3 Minimum geometry of native BBTT under IEFPCM variation of PCM

(PBE1PBE/6-311++G\*\*, IEFPCM CH<sub>2</sub>Cl<sub>2</sub>)

|                                       |          |           |           |           |           |           |           |
|---------------------------------------|----------|-----------|-----------|-----------|-----------|-----------|-----------|
| #p opt freq=noraman PBE1PBE/6-        | S 0      | 0.000001  | -2.218513 | 0.868968  |           |           |           |
| 311++g(d,p)                           | C 0      | -1.325033 | -1.271412 | 0.167461  |           |           |           |
| scrf=(iefpcm,solvent=dichloromethane) | C 0      | -1.184577 | 0.018224  | -0.241194 |           |           |           |
| pop=full geom=check guess=read        | N 0      | 0.000000  | 0.733227  | -0.314651 |           |           |           |
| 0 1                                   | C 0      | -2.665178 | -1.758627 | 0.028870  |           |           |           |
| C 0                                   | 5.387782 | -2.259165 | -0.343468 | C 0       | -3.530904 | -0.767319 | -0.480257 |
| C 0                                   | 4.542856 | -3.256753 | 0.157325  | S 0       | -2.677659 | 0.718626  | -0.826848 |
| C 0                                   | 3.192073 | -3.017033 | 0.348352  | C 0       | -3.192071 | -3.017035 | 0.348351  |
| C 0                                   | 2.665180 | -1.758626 | 0.028870  | C 0       | -4.542854 | -3.256755 | 0.157323  |
| C 0                                   | 3.530905 | -0.767318 | -0.480257 | C 0       | -5.387780 | -2.259168 | -0.343471 |
| C 0                                   | 4.888555 | -1.004212 | -0.665187 | C 0       | -4.888554 | -1.004215 | -0.665189 |
| C 0                                   | 1.325034 | -1.271412 | 0.167461  | C 0       | -0.000000 | 2.158113  | -0.359052 |
| C 0                                   | 1.184577 | 0.018224  | -0.241194 | C 0       | -0.000001 | 2.880483  | 0.848419  |
| S 0                                   | 2.677659 | 0.718626  | -0.826850 |           |           |           |           |

C 0 -0.000002 4.274131 0.799298  
 C 0 -0.000001 4.924722 -0.431349  
 C 0 0.000001 4.211537 -1.622631  
 C 0 0.000001 2.821280 -1.578347  
 O 0 -0.000002 2.149315 1.976154  
 C 0 -0.000005 2.833651 3.219168  
 H 0 6.443188 -2.466011 -0.484477  
 H 0 4.952732 -4.231355 0.400962  
 H 0 2.543128 -3.795270 0.737623  
 H 0 5.541276 -0.230691 -1.055463  
 H 0 -2.543125 -3.795271 0.737622  
 H 0 -4.952729 -4.231358 0.400959  
 H 0 -6.443185 -2.466015 -0.484480  
 H 0 -5.541275 -0.230695 -1.055465  
 H 0 -0.000003 4.856776 1.712171

H 0 -0.000001 6.009755 -0.449980  
 H 0 0.000001 4.727248 -2.575877  
 H 0 0.000001 2.232836 -2.490261  
 H 0 -0.000007 2.058920 3.983667  
 H 0 0.895560 3.453153 3.328090  
 H 0 -0.895572 3.453152 3.328086

SCF Done: E(RPBE1PBE) = -2208.70360407

Sum of electronic and zero-point Energies= -2208.384268

Sum of electronic and thermal Energies= -2208.361433

Sum of electronic and thermal Enthalpies= -2208.360489

Sum of electronic and thermal Free Energies= -2208.438911

#### 6.1.5.4 TD-DFT calculation of ground state of native BBTT under IEFPCM variation of PCM

(PBE1PBE/6-311++G\*\*, IEFPCM CH<sub>2</sub>Cl<sub>2</sub>)

#p td=(singlets,nstates=24) PBE1PBE/6-311++g(d,p)

scrf=(iefpcm,solvent=dichloromethane)

geom=check guess=read

<TDDFT> Excited State 1: Singlet-A  
2.9331 eV 422.71 nm f=0.1434

<TDDFT>HOMO -> LUMO  
96.3%

<TDDFT> Excited State 2: Singlet-A  
3.4963 eV 354.61 nm f=0.0080

<TDDFT>HOMO -> LUMO+1  
98.7%

<TDDFT> Excited State 3: Singlet-A  
3.6869 eV 336.28 nm f=0.0093

<TDDFT>HOMO -> LUMO+3  
84.6%

<TDDFT>HOMO -> LUMO+7 8.0%

<TDDFT>HOMO -> LUMO+10 2.7%

<TDDFT> Excited State 4: Singlet-A  
3.8339 eV 323.39 nm f=0.0455

<TDDFT>HOMO -> LUMO+2  
66.2%

<TDDFT>HOMO -> LUMO+4  
28.4%

<TDDFT> Excited State 5: Singlet-A  
3.8418 eV 322.72 nm f=0.0589

<TDDFT>HOMO -> LUMO+2  
22.5%

<TDDFT>HOMO -> LUMO+4  
66.2%

<TDDFT>HOMO -> LUMO+6 5.6%

<TDDFT>HOMO -> LUMO+8 2.3%

<TDDFT> Excited State 6: Singlet-A  
3.9943 eV 310.40 nm f=0.0008

<TDDFT>HOMO -> LUMO+3 4.2%

<TDDFT>HOMO -> LUMO+5  
80.0%

<TDDFT>HOMO -> LUMO+7  
11.0%

<TDDFT> Excited State 7: Singlet-A  
4.0934 eV 302.89 nm f=0.0303

<TDDFT>HOMO -> LUMO+2 7.0%

<TDDFT>HOMO -> LUMO+4 2.8%

<TDDFT>HOMO -> LUMO+6  
51.3%

<TDDFT>HOMO -> LUMO+8  
32.5%

|                                                                     |                                                                     |
|---------------------------------------------------------------------|---------------------------------------------------------------------|
| <TDDFT> Excited State 8: Singlet-A<br>4.1260 eV 300.49 nm f=0.0183  | <TDDFT>HOMO -> LUMO+7<br>10.4%                                      |
| <TDDFT>HOMO -> LUMO+3 7.8%                                          | <TDDFT>HOMO -> LUMO+10<br>63.5%                                     |
| <TDDFT>HOMO -> LUMO+5<br>17.4%                                      | <TDDFT>HOMO -> LUMO+14<br>10.7%                                     |
| <TDDFT>HOMO -> LUMO+7<br>64.2%                                      | <TDDFT> Excited State 14: Singlet-A<br>4.8326 eV 256.56 nm f=0.0886 |
| <TDDFT>HOMO -> LUMO+10 7.4%                                         | <TDDFT>HOMO-3 -> LUMO<br>85.4%                                      |
| <TDDFT> Excited State 9: Singlet-A<br>4.3062 eV 287.92 nm f=0.0106  | <TDDFT>HOMO-3 -> LUMO+1 8.0%                                        |
| <TDDFT>HOMO -> LUMO+6<br>33.5%                                      | <TDDFT> Excited State 15: Singlet-A<br>4.9233 eV 251.83 nm f=0.0002 |
| <TDDFT>HOMO -> LUMO+8<br>48.3%                                      | <TDDFT>HOMO-1 -> LUMO+1 2.9%                                        |
| <TDDFT>HOMO -> LUMO+9 9.8%                                          | <TDDFT>HOMO -> LUMO+8 2.6%                                          |
| <TDDFT>HOMO -> LUMO+12 4.1%                                         | <TDDFT>HOMO -> LUMO+11<br>79.0%                                     |
| <TDDFT> Excited State 10: Singlet-A<br>4.5863 eV 270.34 nm f=0.1363 | <TDDFT>HOMO -> LUMO+12 4.5%                                         |
| <TDDFT>HOMO-2 -> LUMO<br>78.2%                                      | <TDDFT>HOMO -> LUMO+18 4.2%                                         |
| <TDDFT>HOMO-1 -> LUMO+4 2.4%                                        | <TDDFT> Excited State 16: Singlet-A<br>4.9233 eV 251.83 nm f=0.1849 |
| <TDDFT>HOMO -> LUMO+10 2.7%                                         | <TDDFT>HOMO-2 -> LUMO 4.1%                                          |
| <TDDFT>HOMO -> LUMO+14 6.4%                                         | <TDDFT>HOMO -> LUMO+7 2.8%                                          |
| <TDDFT>HOMO -> LUMO+15 2.4%                                         | <TDDFT>HOMO -> LUMO+10<br>11.6%                                     |
| <TDDFT> Excited State 11: Singlet-A<br>4.5986 eV 269.62 nm f=0.0985 | <TDDFT>HOMO -> LUMO+14<br>48.2%                                     |
| <TDDFT>HOMO-2 -> LUMO+2 2.2%                                        | <TDDFT>HOMO -> LUMO+15<br>26.4%                                     |
| <TDDFT>HOMO-1 -> LUMO<br>81.9%                                      | <TDDFT> Excited State 17: Singlet-A<br>4.9641 eV 249.76 nm f=0.0141 |
| <TDDFT>HOMO -> LUMO+9 4.1%                                          | <TDDFT>HOMO-4 -> LUMO<br>12.0%                                      |
| <TDDFT> Excited State 12: Singlet-A<br>4.6609 eV 266.01 nm f=0.0112 | <TDDFT>HOMO-3 -> LUMO+1 3.9%                                        |
| <TDDFT>HOMO-1 -> LUMO 5.1%                                          | <TDDFT>HOMO-2 -> LUMO+2 6.5%                                        |
| <TDDFT>HOMO -> LUMO+8 8.6%                                          | <TDDFT>HOMO-1 -> LUMO+1<br>57.4%                                    |
| <TDDFT>HOMO -> LUMO+9<br>75.9%                                      | <TDDFT>HOMO -> LUMO+11 5.4%                                         |
| <TDDFT>HOMO -> LUMO+12 3.2%                                         | <TDDFT> Excited State 18: Singlet-A<br>4.9815 eV 248.89 nm f=0.0068 |
| <TDDFT>HOMO -> LUMO+13 2.5%                                         | <TDDFT>HOMO -> LUMO+6 2.7%                                          |
| <TDDFT> Excited State 13: Singlet-A<br>4.7770 eV 259.54 nm f=0.2015 | <TDDFT>HOMO -> LUMO+8 3.3%                                          |
| <TDDFT>HOMO-2 -> LUMO 7.3%                                          |                                                                     |

|                                     |                              |                                     |                              |
|-------------------------------------|------------------------------|-------------------------------------|------------------------------|
| <TDDFT>HOMO -> LUMO+11              | 7.0%                         | <TDDFT>HOMO-1 -> LUMO+1             | 12.3%                        |
| <TDDFT>HOMO -> LUMO+12              | 78.0%                        | <TDDFT>HOMO-1 -> LUMO+3             | 34.3%                        |
| <TDDFT>HOMO -> LUMO+20              | 4.8%                         | <TDDFT> Excited State 22: Singlet-A | 5.1293 eV 241.72 nm f=0.0142 |
| <TDDFT> Excited State 19: Singlet-A | 5.0757 eV 244.27 nm f=0.0245 | <TDDFT>HOMO-3 -> LUMO+1             | 2.4%                         |
| <TDDFT>HOMO-2 -> LUMO+1             | 50.3%                        | <TDDFT>HOMO -> LUMO+9               | 2.8%                         |
| <TDDFT>HOMO-2 -> LUMO+3             | 12.8%                        | <TDDFT>HOMO -> LUMO+13              | 86.9%                        |
| <TDDFT>HOMO-2 -> LUMO+7             | 2.0%                         | <TDDFT> Excited State 23: Singlet-A | 5.1377 eV 241.32 nm f=0.0086 |
| <TDDFT>HOMO-1 -> LUMO+2             | 7.5%                         | <TDDFT>HOMO-5 -> LUMO               | 2.6%                         |
| <TDDFT>HOMO-1 -> LUMO+4             | 10.8%                        | <TDDFT>HOMO-2 -> LUMO+1             | 38.2%                        |
| <TDDFT>HOMO-1 -> LUMO+6             | 4.2%                         | <TDDFT>HOMO-2 -> LUMO+3             | 12.1%                        |
| <TDDFT> Excited State 20: Singlet-A | 5.0770 eV 244.21 nm f=0.0636 | <TDDFT>HOMO-1 -> LUMO+2             | 30.3%                        |
| <TDDFT>HOMO-4 -> LUMO               | 19.8%                        | <TDDFT>HOMO-1 -> LUMO+6             | 2.2%                         |
| <TDDFT>HOMO-3 -> LUMO               | 8.6%                         | <TDDFT> Excited State 24: Singlet-A | 5.1840 eV 239.17 nm f=0.0001 |
| <TDDFT>HOMO-3 -> LUMO+1             | 39.7%                        | <TDDFT>HOMO-2 -> LUMO+3             | 4.0%                         |
| <TDDFT>HOMO-2 -> LUMO+2             | 4.4%                         | <TDDFT>HOMO-1 -> LUMO+4             | 2.5%                         |
| <TDDFT>HOMO-1 -> LUMO+1             | 4.1%                         | <TDDFT>HOMO -> LUMO+10              | 3.9%                         |
| <TDDFT>HOMO-1 -> LUMO+3             | 8.1%                         | <TDDFT>HOMO -> LUMO+14              | 17.9%                        |
| <TDDFT> Excited State 21: Singlet-A | 5.1186 eV 242.22 nm f=0.0083 | <TDDFT>HOMO -> LUMO+15              | 48.8%                        |
| <TDDFT>HOMO-4 -> LUMO               | 9.4%                         | <TDDFT>HOMO -> LUMO+16              | 4.4%                         |
| <TDDFT>HOMO-3 -> LUMO+1             | 21.1%                        | <TDDFT>HOMO -> LUMO+22              | 3.2%                         |
| <TDDFT>HOMO-2 -> LUMO+6             | 5.5%                         | <TDDFT>HOMO -> LUMO+23              | 4.3%                         |

#### 6.1.5.5 Minimum geometry of excited state of native BBTT under IEFPCM variation of PCM

(PBE1PBE/6-311++G\*\*, IEFPCM CH<sub>2</sub>Cl<sub>2</sub>)

|                                                  |     |          |           |           |
|--------------------------------------------------|-----|----------|-----------|-----------|
| #p opt td=(nstates=4) PBE1PBE/6-311++g(d,p) freq | C 0 | 3.241748 | -3.075210 | 0.146255  |
| scrf=(iefpcm,solvent=dichloromethane)            | C 0 | 2.688582 | -1.792693 | -0.034672 |
| geom=check guess=read                            | C 0 | 3.576158 | -0.699008 | -0.197399 |
| 0 1                                              | C 0 | 4.950491 | -0.858693 | -0.181914 |
| C 0 5.475350 -2.140419 0.001272                  | C 0 | 1.329119 | -1.381085 | -0.087277 |
| C 0 4.618799 -3.232499 0.162285                  | C 0 | 1.185158 | 0.011081  | -0.301054 |

|     |           |           |           |                                         |           |           |           |
|-----|-----------|-----------|-----------|-----------------------------------------|-----------|-----------|-----------|
| S 0 | 2.727411  | 0.834784  | -0.410245 | H 0                                     | 2.592968  | -3.936571 | 0.271782  |
| S 0 | -0.000001 | -2.439885 | 0.166896  | H 0                                     | 5.609330  | -0.005826 | -0.307458 |
| C 0 | -1.329120 | -1.381085 | -0.087277 | H 0                                     | -2.592970 | -3.936569 | 0.271783  |
| C 0 | -1.185158 | 0.011081  | -0.301053 | H 0                                     | -5.037435 | -4.224023 | 0.302425  |
| N 0 | 0.000000  | 0.671632  | -0.381828 | H 0                                     | -6.550202 | -2.282970 | 0.017849  |
| C 0 | -2.688583 | -1.792692 | -0.034673 | H 0                                     | -5.609330 | -0.005824 | -0.307462 |
| C 0 | -3.576158 | -0.699006 | -0.197401 | H 0                                     | 0.000000  | 4.866459  | 1.486344  |
| S 0 | -2.727410 | 0.834785  | -0.410247 | H 0                                     | 0.000006  | 5.934607  | -0.719026 |
| C 0 | -3.241749 | -3.075209 | 0.146255  | H 0                                     | 0.000008  | 4.572191  | -2.794574 |
| C 0 | -4.618800 | -3.232497 | 0.162283  | H 0                                     | 0.000005  | 2.081238  | -2.613956 |
| C 0 | -5.475350 | -2.140417 | 0.001269  | H 0                                     | -0.000008 | 2.148103  | 3.863378  |
| C 0 | -4.950491 | -0.858691 | -0.181917 | H 0                                     | 0.895967  | 3.518610  | 3.160149  |
| C 0 | 0.000001  | 2.101768  | -0.480249 | H 0                                     | -0.895977 | 3.518612  | 3.160145  |
| C 0 | -0.000000 | 2.859130  | 0.702530  | SCF Done: E(RPBE1PBE) = -               |           |           |           |
| C 0 | 0.000001  | 4.249856  | 0.596339  | 2208.69188978                           |           |           |           |
| C 0 | 0.000005  | 4.851262  | -0.658435 | Sum of electronic and zero-point        |           |           |           |
| C 0 | 0.000006  | 4.093153  | -1.822588 | Energies= -2208.295261                  |           |           |           |
| C 0 | 0.000004  | 2.706768  | -1.727761 | Sum of electronic and thermal Energies= |           |           |           |
| O 0 | -0.000004 | 2.169186  | 1.853667  | -2208.271519                            |           |           |           |
| C 0 | -0.000006 | 2.896624  | 3.073405  | Sum of electronic and thermal           |           |           |           |
| H 0 | 6.550201  | -2.282973 | 0.017853  | Enthalpies= -2208.270575                |           |           |           |
| H 0 | 5.037433  | -4.224025 | 0.302426  | Sum of electronic and thermal Free      |           |           |           |
|     |           |           |           | Energies= -2208.351146                  |           |           |           |

#### 6.1.5.6 TD-DFT calculation of excited state of native BBTT under IEFPCM variation of PCM

(PBE1PBE/6-311++G\*\*, IEFPCM CH<sub>2</sub>Cl<sub>2</sub>)

```
#p opt td=(nstates=4) PBE1PBE/6-
311++g(d,p) freq
scrf=(iefpcm,solvent=dichloromethane)
geom=check guess=read

<TDDFT> Excited State 1: Singlet-A
2.2143 eV 559.92 nm f=0.1259
<TDDFT>HOMO -> LUMO
98.2%

<TDDFT> Excited State 2: Singlet-A
2.9230 eV 424.17 nm f=0.0023
<TDDFT>HOMO -> LUMO+1
98.8%

<TDDFT> Excited State 3: Singlet-A
3.3553 eV 369.52 nm f=0.0042
<TDDFT>HOMO -> LUMO+2
96.0%

<TDDFT> Excited State 4: Singlet-A
3.3919 eV 365.53 nm f=0.0009
<TDDFT>HOMO -> LUMO+3
35.0%

<TDDFT>HOMO -> LUMO+4
37.8%

<TDDFT>HOMO -> LUMO+6
23.2%
```

#### 6.1.5.7 Minimum geometry of native BBTT under SMD variation of PCM (B3LYP/6-311++G\*\*, SMD CH<sub>2</sub>Cl<sub>2</sub>)

Conformer I:

#p opt=tight freq=noraman rb3lyp/6-311++g(d,p) pop=full  
 scrf=(SMD,solvent=dichloromethane)  
 geom=check

0 1

|     |           |           |           |
|-----|-----------|-----------|-----------|
| C 0 | 5.398699  | -2.297641 | -0.357008 |
| C 0 | 4.547877  | -3.276540 | 0.178804  |
| C 0 | 3.197844  | -3.017919 | 0.379503  |
| C 0 | 2.676198  | -1.759296 | 0.034996  |
| C 0 | 3.549149  | -0.788338 | -0.511266 |
| C 0 | 4.905370  | -1.042629 | -0.705079 |
| C 0 | 1.337079  | -1.252751 | 0.178728  |
| C 0 | 1.191391  | 0.028435  | -0.259787 |
| S 0 | 2.697535  | 0.708709  | -0.891663 |
| S 0 | -0.000001 | -2.179517 | 0.923641  |
| C 0 | -1.337081 | -1.252750 | 0.178730  |
| C 0 | -1.191392 | 0.028436  | -0.259785 |
| N 0 | -0.000000 | 0.748012  | -0.337134 |
| C 0 | -2.676200 | -1.759294 | 0.034998  |
| C 0 | -3.549151 | -0.788336 | -0.511264 |
| S 0 | -2.697536 | 0.708713  | -0.891659 |
| C 0 | -3.197846 | -3.017917 | 0.379504  |
| C 0 | -4.547880 | -3.276537 | 0.178803  |
| C 0 | -5.398701 | -2.297637 | -0.357009 |
| C 0 | -4.905372 | -1.042626 | -0.705079 |
| C 0 | 0.000001  | 2.185337  | -0.354144 |
| C 0 | 0.000002  | 2.891024  | 0.868637  |
| C 0 | 0.000003  | 4.289373  | 0.841512  |
| C 0 | 0.000002  | 4.962608  | -0.380945 |
| C 0 | 0.000000  | 4.266260  | -1.586363 |
| C 0 | -0.000000 | 2.871676  | -1.565060 |
| O 0 | 0.000003  | 2.138636  | 1.992281  |
| C 0 | 0.000004  | 2.796605  | 3.265795  |
| H 0 | 6.449802  | -2.517842 | -0.504513 |
| H 0 | 4.950184  | -4.248418 | 0.442086  |
| H 0 | 2.550114  | -3.781747 | 0.795285  |
| H 0 | 5.561908  | -0.287051 | -1.121471 |

|     |           |           |           |
|-----|-----------|-----------|-----------|
| H 0 | -2.550117 | -3.781745 | 0.795285  |
| H 0 | -4.950187 | -4.248415 | 0.442085  |
| H 0 | -6.449804 | -2.517839 | -0.504514 |
| H 0 | -5.561909 | -0.287047 | -1.121470 |
| H 0 | 0.000005  | 4.856200  | 1.762828  |
| H 0 | 0.000003  | 6.047226  | -0.381632 |
| H 0 | -0.000000 | 4.796246  | -2.531119 |
| H 0 | -0.000002 | 2.302443  | -2.487870 |
| H 0 | 0.000005  | 1.998262  | 4.006019  |
| H 0 | 0.896272  | 3.410402  | 3.391126  |
| H 0 | -0.896263 | 3.410402  | 3.391127  |

SCF Done: E(RB3LYP) = -  
 2210.36564726

Sum of electronic and zero-point  
 Energies= -2210.049351

Sum of electronic and thermal Energies=  
 -2210.026448

Sum of electronic and thermal  
 Enthalpies= -2210.025503

Sum of electronic and thermal Free  
 Energies= -2210.103255

Conformer II:

#p opt=tight freq=noraman rb3lyp/6-311++g(d,p) pop=full  
 scrf=(SMD,solvent=dichloromethane)  
 geom=check guess=read

0 1

|     |           |           |           |
|-----|-----------|-----------|-----------|
| C 0 | 5.420833  | -2.175468 | 0.423278  |
| C 0 | 4.566728  | -3.277775 | 0.265535  |
| C 0 | 3.210287  | -3.103548 | 0.021358  |
| C 0 | 2.683963  | -1.802398 | -0.062578 |
| C 0 | 3.562004  | -0.704724 | 0.103437  |
| C 0 | 4.923580  | -0.876956 | 0.342345  |
| C 0 | 1.336972  | -1.373584 | -0.325987 |
| C 0 | 1.191974  | -0.018103 | -0.335040 |
| S 0 | 2.707790  | 0.832284  | -0.024203 |
| S 0 | -0.000000 | -2.498508 | -0.711553 |
| C 0 | -1.336973 | -1.373584 | -0.325988 |
| C 0 | -1.191974 | -0.018103 | -0.335041 |
| N 0 | -0.000000 | 0.685245  | -0.515363 |

|     |           |           |           |                                         |           |           |           |
|-----|-----------|-----------|-----------|-----------------------------------------|-----------|-----------|-----------|
| C 0 | -2.683963 | -1.802397 | -0.062578 | H 0                                     | -2.561879 | -3.964521 | -0.098509 |
| C 0 | -3.562004 | -0.704724 | 0.103438  | H 0                                     | -4.971795 | -4.281243 | 0.333726  |
| S 0 | -2.707790 | 0.832284  | -0.024202 | H 0                                     | -6.476665 | -2.332353 | 0.611865  |
| C 0 | -3.210287 | -3.103548 | 0.021358  | H 0                                     | -5.580769 | -0.023661 | 0.466512  |
| C 0 | -4.566728 | -3.277775 | 0.265536  | H 0                                     | 0.000000  | 4.955424  | 1.249754  |
| C 0 | -5.420833 | -2.175467 | 0.423279  | H 0                                     | -0.000001 | 5.964027  | -0.987590 |
| C 0 | -4.923580 | -0.876956 | 0.342346  | H 0                                     | -0.000002 | 4.536401  | -3.024863 |
| C 0 | -0.000000 | 2.117839  | -0.636178 | H 0                                     | -0.000002 | 2.052735  | -2.769317 |
| C 0 | 0.000001  | 2.923318  | 0.523639  | H 0                                     | 0.000004  | 2.308545  | 3.726194  |
| C 0 | 0.000000  | 4.315490  | 0.377705  | H 0                                     | 0.896576  | 3.662255  | 2.992289  |
| C 0 | -0.000001 | 4.883461  | -0.895546 | H 0                                     | -0.896571 | 3.662254  | 2.992292  |
| C 0 | -0.000001 | 4.087251  | -2.039093 | SCF Done: E(RB3LYP) = -                 |           |           |           |
| C 0 | -0.000001 | 2.701285  | -1.900472 | 2210.36463875                           |           |           |           |
| O 0 | 0.000001  | 2.273275  | 1.709116  | Sum of electronic and zero-point        |           |           |           |
| C 0 | 0.000003  | 3.040139  | 2.919913  | Energies= -2210.048543                  |           |           |           |
| H 0 | 6.476665  | -2.332353 | 0.611863  | Sum of electronic and thermal Energies= |           |           |           |
| H 0 | 4.971794  | -4.281243 | 0.333726  | -2210.025688                            |           |           |           |
| H 0 | 2.561879  | -3.964521 | -0.098508 | Sum of electronic and thermal           |           |           |           |
| H 0 | 5.580769  | -0.023661 | 0.466510  | Enthalpies= -2210.024744                |           |           |           |
|     |           |           |           | Sum of electronic and thermal Free      |           |           |           |
|     |           |           |           | Energies= -2210.101649                  |           |           |           |

#### 6.1.5.8 Minimum geometry of radical cation of BBTT in gas phase (B3LYP/6-311++G\*\*)

```
#p ub3lyp/6-311++g(d,p) opt
freq=noraman scf=maxcycle=1000
0 1
```

|     |           |           |           |     |           |           |           |
|-----|-----------|-----------|-----------|-----|-----------|-----------|-----------|
| C 0 | -5.480398 | -2.130108 | 0.008265  | C 0 | 3.586226  | -0.693094 | -0.186917 |
| C 0 | -4.628536 | -3.233740 | 0.170959  | S 0 | 2.718818  | 0.830621  | -0.402346 |
| C 0 | -3.252534 | -3.076413 | 0.155629  | C 0 | 3.252349  | -3.076552 | 0.155638  |
| C 0 | -2.712182 | -1.791307 | -0.025026 | C 0 | 4.628344  | -3.233942 | 0.170919  |
| C 0 | -3.586313 | -0.692920 | -0.186768 | C 0 | 5.480252  | -2.130363 | 0.008104  |
| C 0 | -4.968757 | -0.849263 | -0.172909 | C 0 | 4.968663  | -0.849506 | -0.173133 |
| C 0 | -1.337522 | -1.377024 | -0.074631 | C 0 | 0.000025  | 2.111448  | -0.483558 |
| C 0 | -1.192209 | -0.010472 | -0.267993 | C 0 | 0.000182  | 2.881593  | 0.695874  |
| S 0 | -2.718839 | 0.830766  | -0.402168 | C 0 | 0.000200  | 4.274168  | 0.572490  |
| S 0 | -0.000080 | -2.484201 | 0.098978  | C 0 | 0.000034  | 4.861757  | -0.691341 |
| C 0 | 1.337411  | -1.377082 | -0.074613 | C 0 | -0.000147 | 4.089341  | -1.850870 |
| C 0 | 1.192154  | -0.010519 | -0.267990 | C 0 | -0.000152 | 2.702349  | -1.743222 |
| N 0 | -0.000008 | 0.666689  | -0.361390 | O 0 | 0.000280  | 2.193801  | 1.857352  |
| C 0 | 2.712049  | -1.791431 | -0.025074 | C 0 | 0.000578  | 2.919690  | 3.095002  |
|     |           |           |           | H 0 | -6.553753 | -2.275492 | 0.022741  |
|     |           |           |           | H 0 | -5.053685 | -4.220070 | 0.309674  |
|     |           |           |           | H 0 | -2.603841 | -3.935831 | 0.281340  |



H O -5.631121 -0.001604 -0.299017  
H O 2.603621 -3.935936 0.281402  
H O 5.053452 -4.220279 0.309711  
H O 6.553600 -2.275799 0.022532  
H O 5.631061 -0.001895 -0.299381  
H O 0.000345 4.900798 1.453675  
H O 0.000042 5.942909 -0.765452  
H O -0.000283 4.558431 -2.826159  
H O -0.000261 2.073958 -2.626337  
H O 0.000774 2.162417 3.875181

H O 0.897223 3.538277 3.183066  
H O -0.896035 3.538261 3.183497

SCF Done: E(UB3LYP) = -  
2210.11857907

Sum of electronic and zero-point  
Energies= -2209.801469

Sum of electronic and thermal Energies=  
-2209.778650

Sum of electronic and thermal  
Enthalpies= -2209.777705

Sum of electronic and thermal Free  
Energies= -2209.855263

### 6.1.5.9 Minimum geometry of radical cation of BBTT under IEFPCM variation of PCM

(B3LYP/6-311++G\*\*, IEFPCM CH<sub>2</sub>Cl<sub>2</sub>)

#p ub3lyp/6-311++g(d,p) opt  
freq=noraman scf=maxcycle=1000  
scrf=(iefpcm,solvent=dichloromethane)  
geom=check guess=read  
0 1  
C O -5.479832 -2.126569 0.027051  
C O -4.627409 -3.231790 0.178529  
C O -3.250567 -3.076068 0.151901  
C O -2.710880 -1.790936 -0.029449  
C O -3.584822 -0.691056 -0.181067  
C O -4.967929 -0.845581 -0.154948  
C O -1.335210 -1.378819 -0.086163  
C O -1.191073 -0.012350 -0.275549  
S O -2.717492 0.831606 -0.398676  
S O -0.000033 -2.487384 0.076727  
C O 1.335163 -1.378845 -0.086172  
C O 1.191052 -0.012374 -0.275562  
N O -0.000004 0.665057 -0.366712  
C O 2.710826 -1.790989 -0.029474  
C O 3.584788 -0.691128 -0.181109  
S O 2.717486 0.831551 -0.398715  
C O 3.250488 -3.076131 0.151880  
C O 4.627327 -3.231882 0.178491  
C O 5.479771 -2.126679 0.026995  
C O 4.967893 -0.845682 -0.155006

C O 0.000008 2.109504 -0.487011  
C O 0.000054 2.878310 0.693420  
C O 0.000060 4.271327 0.572491  
C O 0.000023 4.859918 -0.691021  
C O -0.000020 4.088423 -1.851649  
C O -0.000029 2.700819 -1.746046  
O O 0.000083 2.191372 1.854959  
C O 0.000231 2.920495 3.092422  
H O -6.553281 -2.270074 0.051361  
H O -5.051748 -4.218419 0.318255  
H O -2.601123 -3.935741 0.269439  
H O -5.628993 0.004169 -0.271329  
H O 2.601028 -3.935790 0.269434  
H O 5.051648 -4.218518 0.318219  
H O 6.553217 -2.270207 0.051293  
H O 5.628973 0.004054 -0.271400  
H O 0.000089 4.896534 1.454483  
H O 0.000028 5.941232 -0.763221  
H O -0.000047 4.557887 -2.826790  
H O -0.000062 2.072232 -2.628478  
H O 0.000285 2.164155 3.873339  
H O 0.896471 3.539095 3.177713  
H O -0.895953 3.539151 3.177898

SCF Done: E(UB3LYP) = -  
2210.16814005

Sum of electronic and zero-point  
Energies= -2209.851063

Sum of electronic and thermal Energies=  
-2209.828249

Sum of electronic and thermal  
Enthalpies= -2209.827304

Sum of electronic and thermal Free  
Energies= -2209.905057

#### 6.1.5.10 Minimum geometry of radical cation of BBTT under SMD variation of PCM

(B3LYP/6-311++G\*\*, SMD CH<sub>2</sub>Cl<sub>2</sub>)

#p ub3lyp/6-311++g(d,p) opt  
freq=noraman scf=maxcycle=1000  
scrf=(SMD,solvent=dichloromethane)

0 1

C O -5.478606 -2.131457 0.022270  
C O -4.624218 -3.234338 0.179662  
C O -3.247593 -3.076643 0.156133  
C O -2.710699 -1.790549 -0.028842  
C O -3.587000 -0.693504 -0.186771  
C O -4.969759 -0.849438 -0.163389  
C O -1.336300 -1.375794 -0.082897  
C O -1.190164 -0.010399 -0.275048  
S O -2.719318 0.830822 -0.408370  
S O -0.000098 -2.484037 0.088643  
C O 1.336171 -1.375868 -0.082863  
C O 1.190131 -0.010453 -0.274945  
N O -0.000003 0.667827 -0.360901  
C O 2.710553 -1.790726 -0.028920  
C O 3.586928 -0.693730 -0.186712  
S O 2.719292 0.830729 -0.408091  
C O 3.247368 -3.076887 0.155799  
C O 4.623988 -3.234675 0.179255  
C O 5.478443 -2.131818 0.022096  
C O 4.969672 -0.849729 -0.163310  
C O 0.000030 2.112500 -0.483469  
C O 0.000184 2.880823 0.697786  
C O 0.000314 4.273887 0.575793  
C O 0.000253 4.860772 -0.688512

C O 0.000061 4.088782 -1.849518  
C O -0.000048 2.701017 -1.744292  
O O 0.000142 2.194394 1.858480  
C O 0.000306 2.923475 3.098243  
H O -6.552042 -2.277712 0.044378  
H O -5.047225 -4.221679 0.321241  
H O -2.598110 -3.936058 0.279334  
H O -5.634176 -0.002302 -0.284347  
H O 2.597850 -3.936296 0.278846  
H O 5.046929 -4.222085 0.320544  
H O 6.551870 -2.278139 0.044201  
H O 5.634137 -0.002594 -0.284018  
H O 0.000387 4.898041 1.459086  
H O 0.000345 5.942476 -0.761384  
H O 0.000021 4.558524 -2.825027  
H O -0.000199 2.069716 -2.625690  
H O 0.000168 2.164376 3.878278  
H O 0.897636 3.540883 3.186392  
H O -0.896800 3.541193 3.186429

SCF Done: E(UB3LYP) = -  
2210.19518736

Sum of electronic and zero-point  
Energies= -2209.878225

Sum of electronic and thermal Energies=  
-2209.855540

Sum of electronic and thermal  
Enthalpies= -2209.854596

Sum of electronic and thermal Free  
Energies= -2209.931331

#### 6.1.5.11 Transition state of native BBTT under IEFPCM variation of PCM (B3LYP/6-311++G\*\*, IEFPCM CH<sub>2</sub>Cl<sub>2</sub>)

IEFPCM CH<sub>2</sub>Cl<sub>2</sub>)

#p opt=(ts,noeigen,calcfc) freq=noraman  
b3lyp/6-311++g(d,p) pop=full  
scrf=(iefpcm,solvent=dichloromethane)

0 1  
C O 5.487268 -2.100700 0.188841  
C O 4.626017 -3.205536 0.266916  
C O 3.250460 -3.049984 0.148706  
C O 2.713939 -1.765808 -0.049423  
C O 3.599684 -0.664917 -0.124675  
C O 4.978837 -0.818858 -0.007901  
C O 1.342032 -1.363256 -0.200494  
C O 1.193364 -0.020028 -0.374397  
S O 2.729534 0.846622 -0.371223  
S O -0.000069 -2.546033 -0.217944  
C O -1.342047 -1.363104 -0.201051  
C O -1.193204 -0.019883 -0.374968  
N O 0.000077 0.683189 -0.555688  
C O -2.714012 -1.765493 -0.050095  
C O -3.599621 -0.664492 -0.125317  
S O -2.729257 0.846965 -0.371606  
C O -3.250722 -3.049642 0.147716  
C O -4.626317 -3.205055 0.265676  
C O -5.487441 -2.100134 0.187433  
C O -4.978828 -0.818320 -0.009031  
C O 0.000211 2.120375 -0.544874  
C O -0.000826 2.814224 0.685077  
C O -0.000192 4.212729 0.672727  
C O 0.001700 4.898577 -0.541895

C O 0.002984 4.214298 -1.754576  
C O 0.002264 2.820713 -1.747483  
O O -0.002140 2.050578 1.801901  
C O -0.003056 2.694947 3.080442  
H O 6.557571 -2.242440 0.281835  
H O 5.040019 -4.195361 0.421484  
H O 2.595227 -3.911495 0.212194  
H O 5.641778 0.036349 -0.067961  
H O -2.595604 -3.911247 0.211129  
H O -5.040453 -4.194847 0.420097  
H O -6.557785 -2.241778 0.280110  
H O -5.641672 0.036951 -0.069250  
H O -0.000865 4.769563 1.599727  
H O 0.002198 5.982628 -0.531658  
H O 0.004529 4.754347 -2.693120  
H O 0.003222 2.258205 -2.673768  
H O -0.003981 1.890416 3.812237  
H O 0.892490 3.308178 3.210692  
H O -0.898402 3.308803 3.209113

SCF Done: E(RB3LYP) = -  
2210.34134395

Sum of electronic and zero-point  
Energies= -2210.025191

Sum of electronic and thermal Energies=  
-2210.003135

Sum of electronic and thermal  
Enthalpies= -2210.002191

Sum of electronic and thermal Free  
Energies= -2210.076538

## 6.1.6 anti-anti-N-ortho,ortho'-dicyanophenyl-BBTT 3f

### 6.1.6.1 Minimum geometry of native BBTT in gas phase (B3LYP/6-311++G\*\*)

#p opt freq=noraman rb3lyp/6-311++g(d,p)  
pop=full

0 1  
C O -5.383806 -2.296311 -0.453858  
C O -4.532991 -3.295903 0.041568  
C O -3.188029 -3.039616 0.264827  
C O -2.673174 -1.763391 -0.011624

C O -3.543478 -0.771583 -0.518851  
C O -4.896630 -1.025401 -0.737093  
C O -1.335434 -1.260250 0.170567  
C O -1.199392 0.040566 -0.198434  
S O -2.695962 0.737716 -0.830981  
S O -0.000351 -2.245192 0.817482  
C O 1.335156 -1.260528 0.170919

|     |           |           |           |                                         |           |           |           |
|-----|-----------|-----------|-----------|-----------------------------------------|-----------|-----------|-----------|
| C O | 1.199550  | 0.040291  | -0.198263 | H O                                     | -6.431784 | -2.515509 | -0.621770 |
| N O | 0.000145  | 0.780881  | -0.220364 | H O                                     | -4.932506 | -4.280995 | 0.252751  |
| C O | 2.672847  | -1.763979 | -0.010774 | H O                                     | -2.535669 | -3.816829 | 0.646148  |
| C O | 3.543517  | -0.772362 | -0.517735 | H O                                     | -5.552337 | -0.254534 | -1.124644 |
| S O | 2.696403  | 0.737023  | -0.830237 | H O                                     | 2.534701  | -3.817341 | 0.647088  |
| C O | 3.187340  | -3.040304 | 0.265891  | H O                                     | 4.931556  | -4.282052 | 0.254384  |
| C O | 4.532296  | -3.296903 | 0.042989  | H O                                     | 6.431444  | -2.516952 | -0.619801 |
| C O | 5.383466  | -2.297525 | -0.452249 | H O                                     | 5.552670  | -0.255804 | -1.122998 |
| C O | 4.896674  | -1.026515 | -0.735641 | H O                                     | 0.002623  | 5.323067  | -0.940434 |
| C O | 0.000233  | 2.130729  | 0.259668  | H O                                     | 0.000501  | 5.825591  | 1.491163  |
| C O | 0.001480  | 3.191762  | -0.660348 | H O                                     | -0.001899 | 3.964951  | 3.134160  |
| C O | 0.001628  | 4.521765  | -0.212413 | SCF Done: E(RB3LYP) = -                 |           |           |           |
| C O | 0.000419  | 4.798454  | 1.147845  | 2280.29487954                           |           |           |           |
| C O | -0.000937 | 3.758969  | 2.071078  | Sum of electronic and zero-point        |           |           |           |
| C O | -0.001013 | 2.426990  | 1.635482  | Energies= -2280.014224                  |           |           |           |
| C O | -0.002253 | 1.382734  | 2.613937  | Sum of electronic and thermal Energies= |           |           |           |
| N O | -0.003232 | 0.579917  | 3.443634  | -2279.990194                            |           |           |           |
| C O | 0.002413  | 2.934138  | -2.069582 | Sum of electronic and thermal           |           |           |           |
| N O | 0.003084  | 2.790442  | -3.215230 | Enthalpies= -2279.989250                |           |           |           |
|     |           |           |           | Sum of electronic and thermal Free      |           |           |           |
|     |           |           |           | Energies= -2280.069687                  |           |           |           |

### 6.1.6.2 Minimum geometry of native BBTT under IEFPCM variation of PCM

(B3LYP/6-311++G\*\*, IEFPCM CH<sub>2</sub>Cl<sub>2</sub>)

```
#p opt freq=noraman rb3lyp/6-311++g(d,p)
scrf=(iefpcm,solvent=dichloromethane)
pop=full
0 1
```

|     |           |           |           |     |           |           |           |
|-----|-----------|-----------|-----------|-----|-----------|-----------|-----------|
| C O | -5.396114 | -2.289005 | -0.435626 | N O | -0.000028 | 0.762235  | -0.154465 |
| C O | -4.541892 | -3.308829 | 0.012121  | C O | 2.677713  | -1.779114 | -0.005829 |
| C O | -3.192796 | -3.064439 | 0.229975  | C O | 3.552171  | -0.767007 | -0.464636 |
| C O | -2.677640 | -1.779246 | -0.005666 | S O | 2.705406  | 0.755149  | -0.721155 |
| C O | -3.552185 | -0.767181 | -0.464395 | C O | 3.192956  | -3.064278 | 0.229788  |
| C O | -4.908990 | -1.008111 | -0.676036 | C O | 4.542048  | -3.308598 | 0.011839  |
| C O | -1.337049 | -1.285106 | 0.179141  | C O | 5.396183  | -2.288733 | -0.435983 |
| C O | -1.200966 | 0.028386  | -0.143717 | C O | 4.908973  | -1.007869 | -0.676373 |
| S O | -2.705519 | 0.755023  | -0.720962 | C O | -0.000049 | 2.141000  | 0.232803  |
| S O | 0.000071  | -2.293563 | 0.793159  | C O | -0.000320 | 3.142784  | -0.750495 |
| C O | 1.337112  | -1.285043 | 0.179077  | C O | -0.000390 | 4.498524  | -0.386691 |
| C O | 1.200941  | 0.028442  | -0.143773 | C O | -0.000166 | 4.857301  | 0.954410  |
|     |           |           |           | C O | 0.000142  | 3.877651  | 1.941201  |
|     |           |           |           | C O | 0.000199  | 2.521891  | 1.586229  |
|     |           |           |           | C O | 0.000521  | 1.530029  | 2.617473  |

|     |           |           |           |                                         |           |          |           |
|-----|-----------|-----------|-----------|-----------------------------------------|-----------|----------|-----------|
| N O | 0.000799  | 0.756104  | 3.474425  | H O                                     | -0.000605 | 5.255741 | -1.159879 |
| C O | -0.000484 | 2.790873  | -2.138803 | H O                                     | -0.000218 | 5.903116 | 1.233304  |
| N O | -0.000598 | 2.552053  | -3.268607 | H O                                     | 0.000335  | 4.152602 | 2.988088  |
| H O | -6.446563 | -2.498994 | -0.599114 | SCF Done: E(RB3LYP) = -                 |           |          |           |
| H O | -4.941508 | -4.300216 | 0.191066  | 2280.31091202                           |           |          |           |
| H O | -2.540361 | -3.857753 | 0.576582  | Sum of electronic and zero-point        |           |          |           |
| H O | -5.567353 | -0.221466 | -1.024841 | Energies= -2280.030173                  |           |          |           |
| H O | 2.540589  | -3.857621 | 0.576455  | Sum of electronic and thermal Energies= |           |          |           |
| H O | 4.941730  | -4.299961 | 0.190768  | -2280.006142                            |           |          |           |
| H O | 6.446631  | -2.498669 | -0.599545 | Sum of electronic and thermal           |           |          |           |
| H O | 5.567269  | -0.221192 | -1.025234 | Enthalpies= -2280.005197                |           |          |           |
|     |           |           |           | Sum of electronic and thermal Free      |           |          |           |
|     |           |           |           | Energies= -2280.085865                  |           |          |           |

### 6.1.6.3 Minimum geometry of native BBTT under IEFPCM variation of PCM

(PBE1PBE/6-311++G\*\*, IEFPCM CH<sub>2</sub>Cl<sub>2</sub>)

```
#p opt freq=noraman PBE1PBE/6-
311++g(d,p)
scrf=(iefpcm,solvent=dichloromethane)
pop=full geom=check guess=read
0 1
```

|     |           |           |           |                           |           |           |           |
|-----|-----------|-----------|-----------|---------------------------|-----------|-----------|-----------|
| C O | -5.380649 | -2.251413 | -0.424930 | C O                       | 4.889655  | -0.977586 | -0.670237 |
| C O | -4.532409 | -3.274217 | 0.017249  | C O                       | -0.000000 | 2.120307  | 0.236935  |
| C O | -3.183971 | -3.040015 | 0.224635  | C O                       | 0.000001  | 3.151419  | -0.707523 |
| C O | -2.665176 | -1.761672 | -0.016420 | C O                       | 0.000000  | 4.489804  | -0.299536 |
| C O | -3.532429 | -0.746201 | -0.468523 | C O                       | -0.000001 | 4.799755  | 1.050732  |
| C O | -4.889656 | -0.977585 | -0.670237 | C O                       | -0.000002 | 3.788637  | 2.001243  |
| C O | -1.325178 | -1.277458 | 0.156450  | C O                       | -0.000001 | 2.451298  | 1.598315  |
| C O | -1.192519 | 0.032736  | -0.172269 | C O                       | -0.000001 | 1.416766  | 2.581610  |
| S O | -2.684552 | 0.756723  | -0.732211 | N O                       | 0.000002  | 0.598049  | 3.394688  |
| S O | -0.000000 | -2.283710 | 0.753830  | C O                       | 0.000002  | 2.836583  | -2.101055 |
| C O | 1.325177  | -1.277458 | 0.156449  | N O                       | 0.000003  | 2.621806  | -3.234831 |
| C O | 1.192518  | 0.032736  | -0.172269 | H O                       | -6.434517 | -2.455192 | -0.580949 |
| N O | 0.000000  | 0.765031  | -0.197987 | H O                       | -4.938317 | -4.263386 | 0.200334  |
| C O | 2.665176  | -1.761672 | -0.016420 | H O                       | -2.532046 | -3.837051 | 0.567859  |
| C O | 3.532428  | -0.746202 | -0.468522 | H O                       | -5.545396 | -0.186042 | -1.016094 |
| S O | 2.684552  | 0.756722  | -0.732211 | H O                       | 2.532046  | -3.837052 | 0.567858  |
| C O | 3.183971  | -3.040015 | 0.224635  | H O                       | 4.938317  | -4.263386 | 0.200334  |
| C O | 4.532409  | -3.274217 | 0.017250  | H O                       | 6.434517  | -2.455192 | -0.580948 |
| C O | 5.380649  | -2.251413 | -0.424929 | H O                       | 5.545396  | -0.186042 | -1.016093 |
|     |           |           |           | H O                       | 0.000001  | 5.274006  | -1.047129 |
|     |           |           |           | H O                       | -0.000001 | 5.836040  | 1.366838  |
|     |           |           |           | H O                       | -0.000002 | 4.025840  | 3.058567  |
|     |           |           |           | SCF Done: E(RPBE1PBE) = - |           |           |           |
|     |           |           |           | 2278.58657624             |           |           |           |

Sum of electronic and zero-point  
Energies= -2278.302931

Sum of electronic and thermal Energies=  
-2278.279006

Sum of electronic and thermal  
Enthalpies= -2278.278061

Sum of electronic and thermal Free  
Energies= -2278.358758

#### 6.1.6.4 TD-DFT calculation of ground state of native BBTT under IEFPCM variation of PCM

(PBE1PBE/6-311++G\*\*, IEFPCM CH<sub>2</sub>Cl<sub>2</sub>)

#p td=(singlets,nstates=24) PBE1PBE/6-  
311++g(d,p)  
scrf=(iefpcm,solvent=dichloromethane)  
geom=check guess=read

<TDDFT> Excited State 1: Singlet-A  
2.3337 eV 531.27 nm f=0.0006

<TDDFT>HOMO -> LUMO  
95.4%

<TDDFT>HOMO -> LUMO+1 4.2%

<TDDFT> Excited State 2: Singlet-A  
2.4176 eV 512.83 nm f=0.0058

<TDDFT>HOMO -> LUMO 4.1%

<TDDFT>HOMO -> LUMO+1  
94.9%

<TDDFT> Excited State 3: Singlet-A  
3.2645 eV 379.80 nm f=0.0709

<TDDFT>HOMO -> LUMO+2  
96.3%

<TDDFT> Excited State 4: Singlet-A  
3.6364 eV 340.95 nm f=0.0010

<TDDFT>HOMO-1 -> LUMO  
98.6%

<TDDFT> Excited State 5: Singlet-A  
3.7271 eV 332.66 nm f=0.0125

<TDDFT>HOMO-2 -> LUMO  
98.8%

<TDDFT> Excited State 6: Singlet-A  
3.7895 eV 327.18 nm f=0.0001

<TDDFT>HOMO-1 -> LUMO+1  
93.8%

<TDDFT>HOMO -> LUMO+3 4.3%

<TDDFT> Excited State 7: Singlet-A  
3.8683 eV 320.51 nm f=0.0421

<TDDFT>HOMO-2 -> LUMO+1  
97.1%

<TDDFT> Excited State 8: Singlet-A  
3.9209 eV 316.21 nm f=0.1350

<TDDFT>HOMO-1 -> LUMO+1 4.4%

<TDDFT>HOMO -> LUMO+3  
88.8%

<TDDFT> Excited State 9: Singlet-A  
4.0064 eV 309.47 nm f=0.0019

<TDDFT>HOMO -> LUMO+5  
61.6%

<TDDFT>HOMO -> LUMO+7  
29.4%

<TDDFT>HOMO -> LUMO+11 2.7%

<TDDFT> Excited State 10: Singlet-A  
4.0998 eV 302.41 nm f=0.0015

<TDDFT>HOMO-3 -> LUMO 4.4%

<TDDFT>HOMO -> LUMO+4  
89.4%

<TDDFT> Excited State 11: Singlet-A  
4.1635 eV 297.79 nm f=0.0100

<TDDFT>HOMO-3 -> LUMO  
85.8%

<TDDFT>HOMO -> LUMO+4 4.8%

<TDDFT>HOMO -> LUMO+6 6.7%

<TDDFT> Excited State 12: Singlet-A  
4.2192 eV 293.86 nm f=0.0000

<TDDFT>HOMO -> LUMO+5  
32.6%

<TDDFT>HOMO -> LUMO+7  
60.0%

<TDDFT>HOMO -> LUMO+11 2.4%

<TDDFT> Excited State 13: Singlet-A  
4.2266 eV 293.35 nm f=0.0114

<TDDFT>HOMO-3 -> LUMO 6.6%

<TDDFT>HOMO -> LUMO+6  
83.0%

<TDDFT> Excited State 14: Singlet-A  
4.3364 eV 285.91 nm f=0.0488

|                                                                     |                                                                     |
|---------------------------------------------------------------------|---------------------------------------------------------------------|
| <TDDFT>HOMO-3 -> LUMO+1<br>95.0%                                    | <TDDFT>HOMO -> LUMO+14<br>4.9%                                      |
| <TDDFT> Excited State 15: Singlet-A<br>4.6595 eV 266.09 nm f=0.0634 | <TDDFT> Excited State 20: Singlet-A<br>4.8418 eV 256.07 nm f=0.0265 |
| <TDDFT>HOMO-4 -> LUMO<br>73.4%                                      | <TDDFT>HOMO-4 -> LUMO+1<br>96.2%                                    |
| <TDDFT>HOMO-2 -> LUMO+2<br>20.9%                                    | <TDDFT> Excited State 21: Singlet-A<br>4.8939 eV 253.34 nm f=0.0063 |
| <TDDFT> Excited State 16: Singlet-A<br>4.6704 eV 265.47 nm f=0.0063 | <TDDFT>HOMO-7 -> LUMO<br>18.7%                                      |
| <TDDFT>HOMO-1 -> LUMO+2<br>2.3%                                     | <TDDFT>HOMO-6 -> LUMO<br>31.2%                                      |
| <TDDFT>HOMO -> LUMO+6<br>2.8%                                       | <TDDFT>HOMO-5 -> LUMO+1<br>46.4%                                    |
| <TDDFT>HOMO -> LUMO+8<br>52.6%                                      | <TDDFT> Excited State 22: Singlet-A<br>4.9579 eV 250.08 nm f=0.0079 |
| <TDDFT>HOMO -> LUMO+9<br>35.9%                                      | <TDDFT>HOMO -> LUMO+8<br>13.5%                                      |
| <TDDFT> Excited State 17: Singlet-A<br>4.6742 eV 265.25 nm f=0.0636 | <TDDFT>HOMO -> LUMO+9<br>6.5%                                       |
| <TDDFT>HOMO-4 -> LUMO<br>25.6%                                      | <TDDFT>HOMO -> LUMO+10<br>68.1%                                     |
| <TDDFT>HOMO-2 -> LUMO+2<br>55.9%                                    | <TDDFT> Excited State 23: Singlet-A<br>4.9924 eV 248.35 nm f=0.3543 |
| <TDDFT>HOMO-1 -> LUMO+3<br>3.2%                                     | <TDDFT>HOMO-2 -> LUMO+2<br>9.5%                                     |
| <TDDFT>HOMO -> LUMO+13<br>4.0%                                      | <TDDFT>HOMO-1 -> LUMO+3<br>9.3%                                     |
| <TDDFT> Excited State 18: Singlet-A<br>4.6799 eV 264.93 nm f=0.1262 | <TDDFT>HOMO -> LUMO+11<br>23.2%                                     |
| <TDDFT>HOMO-2 -> LUMO+3<br>3.7%                                     | <TDDFT>HOMO -> LUMO+13<br>44.0%                                     |
| <TDDFT>HOMO-2 -> LUMO+4<br>2.6%                                     | <TDDFT>HOMO -> LUMO+24<br>2.4%                                      |
| <TDDFT>HOMO-1 -> LUMO+2<br>73.8%                                    | <TDDFT> Excited State 24: Singlet-A<br>5.0486 eV 245.58 nm f=0.0189 |
| <TDDFT>HOMO -> LUMO+8<br>6.2%                                       | <TDDFT>HOMO-4 -> LUMO+4<br>3.1%                                     |
| <TDDFT> Excited State 19: Singlet-A<br>4.7610 eV 260.42 nm f=0.0100 | <TDDFT>HOMO-3 -> LUMO+2<br>25.5%                                    |
| <TDDFT>HOMO-1 -> LUMO+2<br>5.5%                                     | <TDDFT>HOMO-2 -> LUMO+3<br>39.5%                                    |
| <TDDFT>HOMO -> LUMO+8<br>17.3%                                      | <TDDFT>HOMO-1 -> LUMO+2<br>5.8%                                     |
| <TDDFT>HOMO -> LUMO+9<br>49.6%                                      | <TDDFT>HOMO-1 -> LUMO+5<br>9.9%                                     |
| <TDDFT>HOMO -> LUMO+10<br>19.6%                                     | <TDDFT>HOMO-1 -> LUMO+7<br>3.0%                                     |

6.1.6.5 Minimum geometry of excited state of native BBTT under IEFPCM variation of PCM (PBE1PBE/6-311++G\*\*, IEFPCM CH<sub>2</sub>Cl<sub>2</sub>)

#p opt td=(nstates=4) PBE1PBE/6-311++g(d,p) freq  
 scrf=(iefpcm,solvent=dichloromethane)  
 geom=check guess=read

0 1  
 C 0 -5.461873 -2.113406 -0.003807  
 C 0 -4.621798 -3.233908 0.014872  
 C 0 -3.247105 -3.089000 0.008921  
 C 0 -2.699441 -1.799942 -0.016385  
 C 0 -3.558561 -0.683494 -0.035309  
 C 0 -4.940719 -0.828310 -0.029054  
 C 0 -1.325311 -1.394046 -0.024343  
 C 0 -1.181563 -0.018621 -0.049650  
 S 0 -2.686974 0.835758 -0.067197  
 S 0 -0.000002 -2.504334 0.001315  
 C 0 1.325308 -1.394048 -0.024351  
 C 0 1.181561 -0.018623 -0.049658  
 N 0 -0.000000 0.667626 -0.067643  
 C 0 2.699437 -1.799946 -0.016400  
 C 0 3.558559 -0.683499 -0.035328  
 S 0 2.686973 0.835754 -0.067212  
 C 0 3.247100 -3.089005 0.008904  
 C 0 4.621793 -3.233915 0.014849  
 C 0 5.461870 -2.113414 -0.003833  
 C 0 4.940717 -0.828317 -0.029078  
 C 0 0.000002 2.097524 0.008941  
 C 0 -0.000015 2.868466 -1.158332  
 C 0 -0.000011 4.257968 -1.107868

C 0 0.000011 4.885156 0.173044  
 C 0 0.000027 4.152671 1.325298  
 C 0 0.000022 2.719015 1.312933  
 C 0 0.000038 1.968095 2.479921  
 N 0 0.000052 1.318677 3.456868  
 C 0 -0.000038 2.210531 -2.426277  
 N 0 -0.000056 1.677238 -3.450965  
 H 0 -6.537656 -2.249616 0.001889  
 H 0 -5.055535 -4.227302 0.035062  
 H 0 -2.603105 -3.962203 0.024552  
 H 0 -5.593739 0.036798 -0.042565  
 H 0 2.603099 -3.962207 0.024538  
 H 0 5.055528 -4.227309 0.035038  
 H 0 6.537652 -2.249625 0.001857  
 H 0 5.593738 0.036790 -0.042592  
 H 0 -0.000023 4.835330 -2.021762  
 H 0 0.000015 5.967688 0.230692  
 H 0 0.000043 4.654413 2.286913

SCF Done: E(RPBE1PBE) = -  
 2278.57401012  
 Sum of electronic and zero-point  
 Energies= -2278.241201  
 Sum of electronic and thermal Energies=  
 -2278.217051  
 Sum of electronic and thermal  
 Enthalpies= -2278.216107  
 Sum of electronic and thermal Free  
 Energies= -2278.295980

### 6.1.6.6 TD-DFT calculation of excited state of native BBTT under IEFPCM variation of PCM

(PBE1PBE/6-311++G\*\*, IEFPCM CH<sub>2</sub>Cl<sub>2</sub>)

#p opt td=(nstates=4) PBE1PBE/6-311++g(d,p) freq  
 scrf=(iefpcm,solvent=dichloromethane)  
 geom=check guess=read

<TDDFT> Excited State 1: Singlet-A  
 1.4155 eV 875.93 nm f=0.0000  
 <TDDFT>HOMO -> LUMO  
 96.8%  
 <TDDFT>HOMO -> LUMO+1 2.9%

<TDDFT> Excited State 2: Singlet-A  
 1.8838 eV 658.17 nm f=0.0004  
 <TDDFT>HOMO -> LUMO 3.0%  
 <TDDFT>HOMO -> LUMO+1  
 96.7%  
 <TDDFT> Excited State 3: Singlet-A  
 2.5654 eV 483.30 nm f=0.1037  
 <TDDFT>HOMO -> LUMO+2  
 98.1%



<TDDFT> Excited State 4: Singlet-A  
3.2204 eV 385.00 nm f=0.0010

<TDDFT>HOMO-1 -> LUMO  
97.8%

### 6.1.6.7 Minimum geometry of native BBTT under SMD variation of PCM (B3LYP/6-311++G\*\*,

SMD CH<sub>2</sub>Cl<sub>2</sub>)

#p opt freq=noraman rb3lyp/6-311++g(d,p)  
scrf=(smd,solvent=dichloromethane)  
pop=full geom=checkpoint guess=read

0 1  
C 0 -5.385315 -2.330671 -0.385385  
C 0 -4.518521 -3.341680 0.058219  
C 0 -3.169167 -3.086154 0.262264  
C 0 -2.666426 -1.797799 0.016299  
C 0 -3.554214 -0.795318 -0.437479  
C 0 -4.911194 -1.046656 -0.635567  
C 0 -1.328006 -1.290713 0.186055  
C 0 -1.203126 0.022150 -0.143748  
S 0 -2.721333 0.732881 -0.709124  
S 0 0.021957 -2.285568 0.795892  
C 0 1.347250 -1.272570 0.163395  
C 0 1.196590 0.037747 -0.165557  
N 0 -0.007674 0.765557 -0.163776  
C 0 2.689096 -1.760096 -0.033434  
C 0 3.551746 -0.745939 -0.509735  
S 0 2.689676 0.767890 -0.771988  
C 0 3.217332 -3.038700 0.210487  
C 0 4.566702 -3.273224 -0.016835  
C 0 5.408546 -2.250770 -0.481877  
C 0 4.908796 -0.976355 -0.731200  
C 0 -0.011900 2.142198 0.237739  
C 0 -0.090104 3.153622 -0.732912  
C 0 -0.104522 4.505714 -0.355038

C 0 -0.036667 4.851641 0.987460  
C 0 0.048543 3.863631 1.961930  
C 0 0.059082 2.511794 1.592738  
C 0 0.142279 1.512329 2.612184  
N 0 0.207402 0.725290 3.454341  
C 0 -0.147160 2.817296 -2.123608  
N 0 -0.190111 2.589229 -3.254751  
H 0 -6.435765 -2.550143 -0.538288  
H 0 -4.908200 -4.335970 0.244828  
H 0 -2.509156 -3.874887 0.605763  
H 0 -5.579962 -0.266933 -0.981514  
H 0 2.577278 -3.835916 0.571850  
H 0 4.976455 -4.259504 0.169133  
H 0 6.459633 -2.453849 -0.651980  
H 0 5.558261 -0.187521 -1.092961  
H 0 -0.165644 5.269659 -1.119958  
H 0 -0.047141 5.894946 1.276963  
H 0 0.104280 4.127483 3.010628

SCF Done: E(RB3LYP) = -  
2280.33315718

Sum of electronic and zero-point  
Energies= -2280.052415

Sum of electronic and thermal Energies=  
-2280.028444

Sum of electronic and thermal  
Enthalpies= -2280.027499

Sum of electronic and thermal Free  
Energies= -2280.107597

### 6.1.6.8 Minimum geometry of radical cation of BBTT in gas phase (B3LYP/6-311++G\*\*)

#p opt freq=noraman ub3lyp/6-  
311++g(d,p) pop=full

0 1  
C 0 -5.477515 -2.155261 -0.000277  
C 0 -4.620636 -3.266698 -0.000266  
C 0 -3.245450 -3.103052 -0.000035

C 0 -2.711115 -1.802883 0.000061  
C 0 -3.591493 -0.698416 -0.000094  
C 0 -4.972673 -0.858684 -0.000168  
C 0 -1.337946 -1.380427 0.000211  
C 0 -1.199661 -0.000722 0.000124

|     |           |           |           |                                         |           |           |           |
|-----|-----------|-----------|-----------|-----------------------------------------|-----------|-----------|-----------|
| S 0 | -2.729439 | 0.843647  | -0.000354 | N 0                                     | 0.000054  | 1.496800  | 3.437297  |
| S 0 | 0.000089  | -2.497645 | 0.000379  | H 0                                     | -6.550163 | -2.306064 | -0.000324 |
| C 0 | 1.338068  | -1.380355 | -0.000127 | H 0                                     | -5.041200 | -4.264579 | -0.000427 |
| C 0 | 1.199683  | -0.000669 | -0.000341 | H 0                                     | -2.593385 | -3.969021 | 0.000117  |
| N 0 | -0.000009 | 0.682973  | -0.000136 | H 0                                     | -5.639020 | -0.004975 | -0.000059 |
| C 0 | 2.711273  | -1.802715 | -0.000113 | H 0                                     | 2.593695  | -3.968859 | 0.000334  |
| C 0 | 3.591572  | -0.698187 | -0.000371 | H 0                                     | 5.041534  | -4.264245 | 0.000509  |
| S 0 | 2.729401  | 0.843819  | -0.000373 | H 0                                     | 6.550357  | -2.305627 | -0.000300 |
| C 0 | 3.245699  | -3.102846 | 0.000178  | H 0                                     | 5.639048  | -0.004598 | -0.000928 |
| C 0 | 4.620897  | -3.266394 | 0.000203  | H 0                                     | -0.000182 | 4.758120  | 2.150708  |
| C 0 | 5.477699  | -2.154897 | -0.000188 | H 0                                     | -0.000448 | 5.995408  | 0.000857  |
| C 0 | 4.972764  | -0.858356 | -0.000504 | H 0                                     | -0.000418 | 4.758929  | -2.149453 |
| C 0 | -0.000046 | 2.127249  | 0.000132  | SCF Done: E(UB3LYP) = -                 |           |           |           |
| C 0 | -0.000052 | 2.822094  | 1.218909  | 2280.06686189                           |           |           |           |
| C 0 | -0.000178 | 4.223872  | 1.209109  | Sum of electronic and zero-point        |           |           |           |
| C 0 | -0.000328 | 4.912463  | 0.000655  | Energies= -2279.785726                  |           |           |           |
| C 0 | -0.000329 | 4.224328  | -1.208055 | Sum of electronic and thermal Energies= |           |           |           |
| C 0 | -0.000201 | 2.822548  | -1.218381 | -2279.761720                            |           |           |           |
| C 0 | -0.000035 | 2.098883  | -2.451673 | Sum of electronic and thermal           |           |           |           |
| N 0 | -0.000069 | 1.498144  | -3.437296 | Enthalpies= -2279.760776                |           |           |           |
| C 0 | -0.000073 | 2.097948  | 2.451923  | Sum of electronic and thermal Free      |           |           |           |
|     |           |           |           | Energies= -2279.841276                  |           |           |           |

#### 6.1.6.9 Minimum geometry of radical cation of BBTT under IEFPCM variation of PCM

(B3LYP/6-311++G\*\*, IEFPCM CH<sub>2</sub>Cl<sub>2</sub>)

```
#p ub3lyp/6-311++g(d,p) opt
freq=noraman scf=maxcycle=1000
scrf=(iefpcm,solvent=dichloromethane)
geom=check guess=read
0 1
```

|     |           |           |           |     |           |           |          |
|-----|-----------|-----------|-----------|-----|-----------|-----------|----------|
| C 0 | -5.477329 | -2.157206 | -0.000241 | C 0 | 1.335742  | -1.385598 | 0.000084 |
| C 0 | -4.620582 | -3.269143 | -0.000155 | C 0 | 1.199225  | -0.006197 | 0.000054 |
| C 0 | -3.244550 | -3.106446 | -0.000086 | N 0 | 0.000000  | 0.677896  | 0.000005 |
| C 0 | -2.710251 | -1.806471 | -0.000095 | C 0 | 2.710251  | -1.806471 | 0.000101 |
| C 0 | -3.589460 | -0.701258 | -0.000182 | C 0 | 3.589460  | -0.701258 | 0.000093 |
| C 0 | -4.971636 | -0.860837 | -0.000259 | S 0 | 2.727315  | 0.839754  | 0.000060 |
| C 0 | -1.335741 | -1.385598 | -0.000021 | C 0 | 3.244550  | -3.106446 | 0.000113 |
| C 0 | -1.199224 | -0.006197 | -0.000054 | C 0 | 4.620582  | -3.269144 | 0.000117 |
| S 0 | -2.727313 | 0.839754  | -0.000185 | C 0 | 5.477329  | -2.157208 | 0.000112 |
| S 0 | 0.000000  | -2.502779 | 0.000124  | C 0 | 4.971637  | -0.860838 | 0.000100 |
|     |           |           |           | C 0 | -0.000001 | 2.121950  | 0.000025 |
|     |           |           |           | C 0 | -0.000279 | 2.820309  | 1.216167 |
|     |           |           |           | C 0 | -0.000285 | 4.222012  | 1.207397 |
|     |           |           |           | C 0 | 0.000004  | 4.910536  | 0.000061 |

C O 0.000290 4.222045 -1.207293  
 C O 0.000279 2.820341 -1.216098  
 C O 0.000543 2.108973 -2.457116  
 N O 0.000726 1.537959 -3.460172  
 C O -0.000547 2.108905 2.457163  
 N O -0.000739 1.537864 3.460203  
 H O -6.550095 -2.306978 -0.000297  
 H O -5.040849 -4.267181 -0.000141  
 H O -2.592692 -3.971986 -0.000023  
 H O -5.636341 -0.006242 -0.000332  
 H O 2.592692 -3.971986 0.000110  
 H O 5.040848 -4.267182 0.000120  
 H O 6.550095 -2.306980 0.000118

H O 5.636342 -0.006244 0.000096  
 H O -0.000510 4.757888 2.147270  
 H O 0.000006 5.992725 0.000076  
 H O 0.000517 4.757945 -2.147152

SCF Done: E(UB3LYP) = -2280.12738416

Sum of electronic and zero-point Energies= -2279.846196

Sum of electronic and thermal Energies= -2279.822138

Sum of electronic and thermal Enthalpies= -2279.821194

Sum of electronic and thermal Free Energies= -2279.903899

#### 6.1.6.10 Minimum geometry of radical cation of BBTT under SMD variation of PCM

(B3LYP/6-311++G\*\*, SMD CH<sub>2</sub>Cl<sub>2</sub>)

#p opt freq=noraman ub3lyp/6-311++g(d,p) pop=full  
scrf=(SMD,solvent=dichloromethane)

0 1

C O -5.472392 -2.170805 0.000193  
 C O -4.610919 -3.279155 0.000472  
 C O -3.235539 -3.111012 0.000316  
 C O -2.708406 -1.807983 -0.000130  
 C O -3.592409 -0.707002 -0.000424  
 C O -4.973724 -0.871307 -0.000257  
 C O -1.336534 -1.381359 -0.000244  
 C O -1.199045 -0.002447 -0.000559  
 S O -2.734118 0.837875 -0.000899  
 S O -0.000057 -2.498720 0.000082  
 C O 1.336464 -1.381408 -0.000304  
 C O 1.199034 -0.002499 -0.000603  
 N O -0.000002 0.682687 -0.000556  
 C O 2.708322 -1.808094 -0.000347  
 C O 3.592371 -0.707153 -0.000721  
 S O 2.734149 0.837763 -0.001047  
 C O 3.235399 -3.111145 -0.000021  
 C O 4.610770 -3.279348 -0.000048

C O 5.472293 -2.171034 -0.000424  
 C O 4.973680 -0.871516 -0.000780  
 C O 0.000038 2.128012 0.000332  
 C O 0.000530 2.827268 1.216935  
 C O 0.000691 4.229107 1.209318  
 C O 0.000265 4.918253 0.002319  
 C O -0.000288 4.230811 -1.205635  
 C O -0.000371 2.828958 -1.215278  
 C O -0.000759 2.120182 -2.457112  
 N O -0.001070 1.548795 -3.459777  
 C O 0.000772 2.116660 2.457706  
 N O 0.000871 1.543661 3.459450  
 H O -6.544729 -2.326038 0.000354  
 H O -5.027333 -4.279155 0.000830  
 H O -2.580257 -3.974804 0.000575  
 H O -5.644162 -0.020315 -0.000413  
 H O 2.580076 -3.974907 0.000238  
 H O 5.027141 -4.279366 0.000230  
 H O 6.544623 -2.326315 -0.000439  
 H O 5.644153 -0.020551 -0.001099  
 H O 0.001090 4.762379 2.151311  
 H O 0.000374 6.001047 0.003071

H O -0.000620 4.765440 -2.146863  
 SCF Done: E(UB3LYP) = -  
 2280.15352013  
 Sum of electronic and zero-point  
 Energies= -2279.872126

Sum of electronic and thermal Energies=  
 -2279.848207  
 Sum of electronic and thermal  
 Enthalpies= -2279.847263  
 Sum of electronic and thermal Free  
 Energies= -2279.927836

### 6.1.6.11 Transition state of native BBTT under IEFPCM variation of PCM (B3LYP/6-311++G\*\*,

#### IEFPCM CH<sub>2</sub>Cl<sub>2</sub>)

#p opt=(ts,noeigen,calcfc,tight)  
 freq=noraman B3LYP/6-311++g(d,p)  
 pop=full  
 scrf=(iefpcm,solvent=dichloromethane)  
 O 1  
 C O 5.497340 -2.171269 -0.027755  
 C O 4.630071 -3.274119 -0.022169  
 C O 3.252264 -3.100093 -0.013928  
 C O 2.720406 -1.799244 -0.011291  
 C O 3.612014 -0.702203 -0.017409  
 C O 4.994294 -0.873104 -0.025258  
 C O 1.344289 -1.378008 -0.002769  
 C O 1.204654 -0.025224 -0.002240  
 S O 2.745908 0.831237 -0.013600  
 S O 0.000001 -2.555600 -0.000005  
 C O -1.344288 -1.378009 0.002757  
 C O -1.204653 -0.025224 0.002223  
 N O -0.000000 0.695715 -0.000013  
 C O -2.720405 -1.799245 0.011284  
 C O -3.612013 -0.702206 0.017400  
 S O -2.745908 0.831235 0.013582  
 C O -3.252262 -3.100095 0.013928  
 C O -4.630068 -3.274121 0.022174  
 C O -5.497339 -2.171273 0.027758  
 C O -4.994293 -0.873107 0.025254  
 C O -0.000001 2.121534 0.000002  
 C O 0.039721 2.835335 1.209606  
 C O 0.041058 4.237281 1.205278

C O -0.000001 4.928065 0.000031  
 C O -0.041060 4.237305 -1.205229  
 C O -0.039724 2.835359 -1.209586  
 C O 0.074533 2.129766 2.454436  
 N O 0.101105 1.584844 3.471968  
 C O -0.074537 2.129816 -2.454431  
 N O -0.101110 1.584916 -3.471975  
 H O 6.569519 -2.327706 -0.034119  
 H O 5.041338 -4.276859 -0.024214  
 H O 2.593082 -3.960784 -0.009457  
 H O 5.662556 -0.020254 -0.029669  
 H O -2.593079 -3.960786 0.009459  
 H O -5.041335 -4.276862 0.024224  
 H O -6.569517 -2.327709 0.034126  
 H O -5.662556 -0.020258 0.029664  
 H O 0.072548 4.772479 2.145341  
 H O -0.000000 6.010441 0.000042  
 H O -0.072550 4.772523 -2.145282

SCF Done: E(RB3LYP) = -  
 2280.30978569  
 Sum of electronic and zero-point  
 Energies= -2280.029525  
 Sum of electronic and thermal Energies=  
 -2280.006119  
 Sum of electronic and thermal  
 Enthalpies= -2280.005175  
 Sum of electronic and thermal Free  
 Energies= -2280.085148

### 6.1.7 *anti-anti-N-ortho,ortho'*-cyanochlorophenyl-BBTT 3k

#### 6.1.7.1 Minimum geometry of native BBTT in gas phase (B3LYP/6-311++G\*\*)

Conformer I:

#p opt freq=noraman rb3lyp/6-311++g(d,p)  
pop=full

```

0 1
C 0 -5.383940 -2.340188 -0.439336
C 0 -4.532735 -3.334424 0.066041
C 0 -3.187391 -3.075830 0.285446
C 0 -2.672227 -1.802822 -0.005594
C 0 -3.543213 -0.816029 -0.522298
C 0 -4.896413 -1.072424 -0.736624
C 0 -1.335590 -1.296527 0.169225
C 0 -1.197894 -0.000645 -0.217123
S 0 -2.696224 0.690006 -0.850565
S 0 -0.000179 -2.262696 0.847492
C 0 1.335403 -1.296644 0.169324
C 0 1.197791 -0.000784 -0.217085
N 0 0.000007 0.736707 -0.249420
C 0 2.671973 -1.803094 -0.005597
C 0 3.542999 -0.816418 -0.522458
S 0 2.696206 0.689652 -0.850753
C 0 3.187050 -3.076107 0.285594
C 0 4.532371 -3.334823 0.066205
C 0 5.383628 -2.340713 -0.439303
C 0 4.896188 -1.072952 -0.736750
C 0 0.000116 2.104534 0.174078
C 0 0.000170 3.131113 -0.790664
C 0 0.000269 4.477369 -0.402848
C 0 0.000374 4.804158 0.946756
C 0 0.000372 3.803576 1.913902
C 0 0.000244 2.465484 1.527543
Cl 0 0.000146 1.230642 2.757927
C 0 0.000180 2.810646 -2.186914
N 0 0.000342 2.611207 -3.324425
H 0 -6.432012 -2.561056 -0.604348
H 0 -4.932015 -4.317439 0.287396
H 0 -2.534178 -3.849584 0.672539
H 0 -5.552248 -0.305730 -1.132247
H 0 2.533815 -3.849734 0.672882

```

```

H 0 4.931552 -4.317871 0.287592
H 0 6.431691 -2.561671 -0.604316
H 0 5.552079 -0.306349 -1.132454
H 0 0.000287 5.248416 -1.162278
H 0 0.000455 5.843628 1.251767
H 0 0.000454 4.050964 2.967737

```

SCF Done: E(RB3LYP) = -  
2647.65520226

Sum of electronic and zero-point  
Energies= -2647.382496

Sum of electronic and thermal Energies=  
-2647.359135

Sum of electronic and thermal  
Enthalpies= -2647.358191

Sum of electronic and thermal Free  
Energies= -2647.437016

Conformer II:

#p opt freq=noraman rb3lyp/6-311++g(d,p)  
pop=full

```

0 1
C 0 -5.381321 -2.347575 -0.477209
C 0 -4.529147 -3.364442 -0.021064
C 0 -3.184410 -3.115326 0.212522
C 0 -2.670436 -1.828802 -0.014190
C 0 -3.542276 -0.819262 -0.482614
C 0 -4.894903 -1.065939 -0.710608
C 0 -1.334964 -1.330775 0.190416
C 0 -1.198520 -0.016409 -0.129094
S 0 -2.696176 0.702507 -0.735669
S 0 -0.000036 -2.327450 0.824150
C 0 1.334941 -1.330776 0.190674
C 0 1.198663 -0.016378 -0.128776
N 0 0.000059 0.718520 -0.112255
C 0 2.670463 -1.828844 -0.013588
C 0 3.542454 -0.819271 -0.481740
S 0 2.696526 0.702489 -0.734793
C 0 3.184305 -3.115437 0.212973
C 0 4.529091 -3.364583 -0.020352
C 0 5.381403 -2.347712 -0.476132

```

|      |           |           |           |                                         |           |              |           |
|------|-----------|-----------|-----------|-----------------------------------------|-----------|--------------|-----------|
| C O  | 4.895109  | -1.066016 | -0.709494 | H O                                     | 4.927271  | -4.357690    | 0.152688  |
| C O  | -0.000087 | 2.086135  | 0.303015  | H O                                     | 6.429421  | -2.561008    | -0.651284 |
| C O  | 0.000521  | 3.126138  | -0.633648 | H O                                     | 5.552110  | -0.280859    | -1.065086 |
| C O  | 0.000282  | 4.460874  | -0.229737 | H O                                     | 0.000744  | 5.240897     | -0.979931 |
| C O  | -0.000556 | 4.774203  | 1.124246  | H O                                     | -0.000740 | 5.812023     | 1.434726  |
| C O  | -0.001151 | 3.763975  | 2.078920  | H O                                     | -0.001777 | 3.997902     | 3.135783  |
| C O  | -0.000927 | 2.425045  | 1.673012  | SCF Done: E(RB3LYP) = -                 |           |              |           |
| C O  | -0.001517 | 1.400345  | 2.672240  | 2647.65395838                           |           |              |           |
| Cl O | 0.001667  | 2.768504  | -2.343415 | Sum of electronic and zero-point        |           |              |           |
| N O  | -0.002019 | 0.609914  | 3.514008  | Energies=                               |           | -2647.381391 |           |
| H O  | -6.429291 | -2.560873 | -0.652631 | Sum of electronic and thermal Energies= |           |              |           |
| H O  | -4.927452 | -4.357471 | 0.152130  | -2647.357956                            |           |              |           |
| H O  | -2.531076 | -3.905669 | 0.564037  | Sum of electronic and thermal           |           |              |           |
| H O  | -5.551780 | -0.280771 | -1.066400 | Enthalpies=                             |           | -2647.357012 |           |
| H O  | 2.530822  | -3.905834 | 0.564128  | Sum of electronic and thermal Free      |           |              |           |
|      |           |           |           | Energies=                               |           | -2647.436300 |           |

#### 6.1.7.2 Minimum geometry of native BBT under IEFPCM variation of PCM

(B3LYP/6-311++G\*\*, IEFPCM CH<sub>2</sub>Cl<sub>2</sub>)

|                                          |      |           |           |           |
|------------------------------------------|------|-----------|-----------|-----------|
| Conformer I:                             | S O  | 2.706609  | 0.709095  | -0.763695 |
| #p opt freq=noraman rb3lyp/6-311++g(d,p) | C O  | 3.196081  | -3.092671 | 0.254485  |
| scrf=(iefpcm,solvent=dichloro            | C O  | 4.547175  | -3.337917 | 0.049241  |
| methane) pop=full                        | C O  | 5.401965  | -2.324308 | -0.411124 |
| 0 1                                      | C O  | 4.913224  | -1.048829 | -0.676796 |
| C O                                      | C O  | 0.000006  | 2.104557  | 0.151059  |
| C O                                      | C O  | 0.000041  | 3.096789  | -0.849927 |
| C O                                      | C O  | 0.000050  | 4.456097  | -0.512765 |
| C O                                      | C O  | 0.000017  | 4.829657  | 0.825283  |
| C O                                      | C O  | -0.000022 | 3.864534  | 1.828029  |
| C O                                      | C O  | -0.000025 | 2.513772  | 1.488696  |
| C O                                      | Cl O | -0.000063 | 1.318361  | 2.762135  |
| C O                                      | C O  | 0.000060  | 2.718823  | -2.231162 |
| S O                                      | N O  | 0.000057  | 2.458769  | -3.356689 |
| S O                                      | H O  | -6.453838 | -2.534731 | -0.564736 |
| C O                                      | H O  | -4.947707 | -4.325236 | 0.247706  |
| C O                                      | H O  | -2.543109 | -3.881627 | 0.609954  |
| C O                                      | H O  | -5.572032 | -0.266880 | -1.035370 |
| N O                                      | H O  | 2.543082  | -3.881648 | 0.609944  |
| C O                                      | H O  | 4.947681  | -4.325266 | 0.247724  |
| C O                                      |      |           |           |           |
| C O                                      |      |           |           |           |

H O 6.453834 -2.534763 -0.564680  
H O 5.572045 -0.266901 -1.035307  
H O 0.000080 5.202087 -1.296357  
H O 0.000022 5.878829 1.092860  
H O -0.000047 4.152884 2.871157

SCF Done: E(RB3LYP) = -  
2647.66710246

Sum of electronic and zero-point  
Energies= -2647.394359

Sum of electronic and thermal Energies=  
-2647.370997

Sum of electronic and thermal  
Enthalpies= -2647.370053

Sum of electronic and thermal Free  
Energies= -2647.448900

Conformer II:

#p opt freq=norman rb3lyp/6-311++g(d,p)  
scrf=(iefpcm,solvent=dichloro  
methane) pop=full

0 1

C O -5.392216 -2.336390 -0.465898  
C O -4.538263 -3.370364 -0.051377  
C O -3.189963 -3.132600 0.179337  
C O -2.674588 -1.839577 -0.009762  
C O -3.549234 -0.812657 -0.435063  
C O -4.904876 -1.047427 -0.659744  
C O -1.336439 -1.350220 0.197375  
C O -1.199364 -0.025755 -0.080733  
S O -2.703017 0.718222 -0.637654  
S O 0.000265 -2.365913 0.804133  
C O 1.336744 -1.350000 0.197244  
C O 1.199419 -0.025559 -0.080868  
N O -0.000033 0.703614 -0.049815  
C O 2.674962 -1.839131 -0.009985  
C O 3.549407 -0.812065 -0.435343

S O 2.702905 0.718655 -0.637936  
C O 3.190571 -3.132061 0.179107  
C O 4.538900 -3.369596 -0.051680  
C O 5.392652 -2.335480 -0.466257  
C O 4.905080 -1.046602 -0.660086  
C O -0.000144 2.093356 0.283722  
C O -0.000509 3.082102 -0.704818  
C O -0.000667 4.436096 -0.369401  
C O -0.000439 4.818006 0.966914  
C O -0.000081 3.859032 1.974165  
C O 0.000047 2.502570 1.634515  
C O 0.000390 1.520247 2.674891

Cl O -0.000935 2.633089 -2.395059  
N O 0.000674 0.749707 3.535386  
H O -6.442114 -2.541107 -0.639399  
H O -4.937421 -4.367789 0.091798  
H O -2.537777 -3.936863 0.500377  
H O -5.562917 -0.249299 -0.982376  
H O 2.538541 -3.936430 0.500198  
H O 4.938238 -4.366951 0.091485  
H O 6.442575 -2.540019 -0.639815  
H O 5.562964 -0.248365 -0.982768  
H O -0.000988 5.179404 -1.155785  
H O -0.000569 5.870038 1.222855  
H O 0.000082 4.150648 3.016211

SCF Done: E(RB3LYP) = -

2647.66626235

Sum of electronic and zero-point  
Energies= -2647.393697

Sum of electronic and thermal Energies=  
-2647.370249

Sum of electronic and thermal  
Enthalpies= -2647.369305

Sum of electronic and thermal Free  
Energies= -2647.448632

SCF Done: E(RB3LYP) = -

2647.66626235

Sum of electronic and zero-point  
Energies= -2647.393697

Sum of electronic and thermal Energies=  
-2647.370249

Sum of electronic and thermal  
Enthalpies= -2647.369305

Sum of electronic and thermal Free  
Energies= -2647.448632

### 6.1.7.3 Minimum geometry of native BBTT under SMD variation of PCM (B3LYP/6-311++G\*\*,

SMD CH<sub>2</sub>Cl<sub>2</sub>)

Conformer I:

#p opt freq=norman rb3lyp/6-311++g(d,p)  
scrf=(smd,solvent=dichloromet

hane) pop=full geom=check guess=read  
0 1  
C 0 -5.407696 -2.322294 -0.400874  
C 0 -4.551574 -3.341154 0.045305  
C 0 -3.198895 -3.100215 0.246080  
C 0 -2.681598 -1.818664 -0.006162  
C 0 -3.559144 -0.807928 -0.462373  
C 0 -4.919005 -1.044758 -0.657255  
C 0 -1.337965 -1.325755 0.159565  
C 0 -1.198757 -0.015524 -0.175690  
S 0 -2.710020 0.710666 -0.738444  
S 0 0.000001 -2.329568 0.783091  
C 0 1.337966 -1.325755 0.159564  
C 0 1.198757 -0.015524 -0.175691  
N 0 -0.000000 0.717239 -0.203997  
C 0 2.681599 -1.818663 -0.006164  
C 0 3.559144 -0.807926 -0.462375  
S 0 2.710019 0.710667 -0.738446  
C 0 3.198896 -3.100214 0.246078  
C 0 4.551576 -3.341152 0.045302  
C 0 5.407697 -2.322292 -0.400878  
C 0 4.919005 -1.044756 -0.657258  
C 0 -0.000000 2.106744 0.144215  
C 0 -0.000004 3.082640 -0.873443  
C 0 -0.000004 4.447633 -0.559713  
C 0 -0.000001 4.842983 0.771751  
C 0 0.000002 3.895707 1.791497  
C 0 0.000002 2.539855 1.474327  
Cl 0 0.000006 1.363493 2.769450  
C 0 -0.000005 2.682265 -2.247851  
N 0 -0.000006 2.401082 -3.368151  
H 0 -6.460866 -2.530344 -0.550923  
H 0 -4.952236 -4.330199 0.236583  
H 0 -2.547334 -3.895325 0.591195  
H 0 -5.579383 -0.258658 -1.005014  
H 0 2.547335 -3.895324 0.591193  
H 0 4.952238 -4.330197 0.236580

H 0 6.460866 -2.530342 -0.550928  
H 0 5.579382 -0.258656 -1.005018  
H 0 -0.000007 5.179494 -1.357286  
H 0 -0.000002 5.896837 1.022004  
H 0 0.000004 4.205325 2.829038  
SCF Done: E(RB3LYP) = -  
2647.68997296  
Sum of electronic and zero-point  
Energies= -2647.417330  
Sum of electronic and thermal Energies=  
-2647.393968  
Sum of electronic and thermal  
Enthalpies= -2647.393024  
Sum of electronic and thermal Free  
Energies= -2647.471813  
Conformer II:  
#p opt freq=noraman rb3lyp/6-311++g(d,p)  
scrf=(smd,solvent=dichloromet  
hane) pop=full geom=check guess=read  
0 1  
C 0 -5.383840 -2.349999 -0.479969  
C 0 -4.531858 -3.379838 -0.051097  
C 0 -3.186249 -3.138718 0.192368  
C 0 -2.671254 -1.845593 0.000871  
C 0 -3.544636 -0.823405 -0.438132  
C 0 -4.897606 -1.060773 -0.675646  
C 0 -1.336932 -1.350095 0.220701  
C 0 -1.198797 -0.026261 -0.060415  
S 0 -2.699631 0.709701 -0.638980  
S 0 0.000167 -2.355784 0.845724  
C 0 1.337122 -1.349953 0.220622  
C 0 1.198825 -0.026136 -0.060495  
N 0 -0.000023 0.702899 -0.016183  
C 0 2.671486 -1.845306 0.000716  
C 0 3.544732 -0.823026 -0.438342  
S 0 2.699542 0.709986 -0.639159  
C 0 3.186636 -3.138371 0.192204  
C 0 4.532260 -3.379343 -0.051326  
C 0 5.384105 -2.349414 -0.480253



|      |           |           |           |                                         |           |           |           |
|------|-----------|-----------|-----------|-----------------------------------------|-----------|-----------|-----------|
| C O  | 4.897717  | -1.060244 | -0.675919 | H O                                     | 4.930971  | -4.377113 | 0.092958  |
| C O  | -0.000096 | 2.100873  | 0.284868  | H O                                     | 6.431926  | -2.557626 | -0.663841 |
| C O  | -0.000360 | 3.065987  | -0.727111 | H O                                     | 5.554487  | -0.264806 | -1.009183 |
| C O  | -0.000489 | 4.428162  | -0.428767 | H O                                     | -0.000716 | 5.152712  | -1.233424 |
| C O  | -0.000334 | 4.843730  | 0.897297  | H O                                     | -0.000438 | 5.902365  | 1.126444  |
| C O  | -0.000053 | 3.911323  | 1.928889  | H O                                     | 0.000073  | 4.229115  | 2.963575  |
| C O  | 0.000054  | 2.546148  | 1.624964  | SCF Done: E(RB3LYP) = -                 |           |           |           |
| C O  | 0.000340  | 1.598006  | 2.696172  | 2647.68965927                           |           |           |           |
| Cl O | -0.000588 | 2.574428  | -2.408702 | Sum of electronic and zero-point        |           |           |           |
| N O  | 0.000576  | 0.857958  | 3.582747  | Energies= -2647.417100                  |           |           |           |
| H O  | -6.431646 | -2.558327 | -0.663510 | Sum of electronic and thermal Energies= |           |           |           |
| H O  | -4.930450 | -4.377654 | 0.093195  | -2647.393703                            |           |           |           |
| H O  | -2.538099 | -3.941889 | 0.525100  | Sum of electronic and thermal           |           |           |           |
| H O  | -5.554481 | -0.265405 | -1.008871 | Enthalpies= -2647.392759                |           |           |           |
| H O  | 2.538592  | -3.941610 | 0.524978  | Sum of electronic and thermal Free      |           |           |           |
|      |           |           |           | Energies= -2647.471464                  |           |           |           |

#### 6.1.7.4 Minimum geometry of radical cation of BBTT in gas phase (B3LYP/6-311++G\*\*)

#p opt freq=norman ub3lyp/6-311++g(d,p) pop=full

|     |           |           |           |           |           |           |           |
|-----|-----------|-----------|-----------|-----------|-----------|-----------|-----------|
| 0 1 | C O       | 5.478567  | -2.197245 | -0.019783 |           |           |           |
| C O | -5.478359 | -2.197680 | -0.018237 | C O       | 4.971627  | -0.901817 | 0.005171  |
| C O | -4.622993 | -3.310025 | -0.045915 | C O       | -0.000096 | 2.076700  | 0.084495  |
| C O | -3.247573 | -3.148021 | -0.048577 | C O       | -0.001297 | 2.838001  | -1.086347 |
| C O | -2.711397 | -1.848802 | -0.023477 | C O       | -0.001409 | 4.230798  | -1.009201 |
| C O | -3.589956 | -0.742969 | 0.003982  | C O       | -0.000016 | 4.855941  | 0.233130  |
| C O | -4.971509 | -0.902229 | 0.007238  | C O       | 0.001350  | 4.110140  | 1.408598  |
| C O | -1.337853 | -1.427739 | -0.018326 | C O       | 0.001248  | 2.714334  | 1.341424  |
| C O | -1.197941 | -0.048183 | 0.012036  | C O       | 0.002057  | 1.922753  | 2.532250  |
| S O | -2.726436 | 0.797569  | 0.035267  | Cl O      | -0.002425 | 2.058791  | -2.641212 |
| S O | 0.000132  | -2.545446 | -0.041520 | N O       | 0.002650  | 1.263739  | 3.480206  |
| C O | 1.338014  | -1.427628 | -0.018338 | H O       | -6.551211 | -2.347091 | -0.015575 |
| C O | 1.198001  | -0.048044 | 0.011786  | H O       | -5.044902 | -4.307188 | -0.064475 |
| N O | 0.000009  | 0.635006  | 0.026834  | H O       | -2.596591 | -4.014603 | -0.068582 |
| C O | 2.711572  | -1.848581 | -0.023968 | H O       | -5.636613 | -0.047808 | 0.030044  |
| C O | 3.590063  | -0.742661 | 0.002528  | H O       | 2.596918  | -4.014418 | -0.067696 |
| S O | 2.726459  | 0.797777  | 0.033838  | H O       | 5.045248  | -4.306818 | -0.064342 |
| C O | 3.247842  | -3.147773 | -0.048493 | H O       | 6.551433  | -2.346565 | -0.017650 |
| C O | 4.623274  | -3.309672 | -0.046317 | H O       | 5.636683  | -0.047332 | 0.026991  |
|     |           |           |           | H O       | -0.002525 | 4.811390  | -1.922654 |
|     |           |           |           | H O       | -0.000020 | 5.937849  | 0.284320  |

H O 0.002426 4.595943 2.375628  
SCF Done: E(UB3LYP) = -  
2647.43029471

Sum of electronic and zero-point  
Energies= -2647.157079

Sum of electronic and thermal Energies=  
-2647.133744

Sum of electronic and thermal  
Enthalpies= -2647.132800

Sum of electronic and thermal Free  
Energies= -2647.211832

### 6.1.7.5 Minimum geometry of radical cation of BBTT under SMD variation of PCM

(B3LYP/6-311++G\*\*, SMD CH<sub>2</sub>Cl<sub>2</sub>)

#p opt freq=noraman ub3lyp/6-  
311++g(d,p) pop=full  
scrf=(SMD,solvent=dichloromethane)

0 1

C O -5.474922 -2.206053 -0.038144  
C O -4.616499 -3.316777 -0.043036  
C O -3.240648 -3.152437 -0.029492  
C O -2.709784 -1.851049 -0.010786  
C O -3.590726 -0.747160 -0.005243  
C O -4.972442 -0.908158 -0.019045  
C O -1.336928 -1.427807 0.005986  
C O -1.197311 -0.049234 0.027025  
S O -2.728624 0.795689 0.021489  
S O 0.000045 -2.545663 0.001734  
C O 1.336981 -1.427760 0.006023  
C O 1.197312 -0.049198 0.027084  
N O -0.000008 0.634445 0.046890  
C O 2.709852 -1.850967 -0.010691  
C O 3.590772 -0.747065 -0.005077  
S O 2.728630 0.795795 0.021654  
C O 3.240740 -3.152344 -0.029428  
C O 4.616595 -3.316660 -0.042934  
C O 5.474996 -2.205920 -0.037983  
C O 4.972490 -0.908034 -0.018855  
C O -0.000036 2.076642 0.085827  
C O 0.000082 2.820391 -1.095280  
C O 0.000021 4.213395 -1.046733

C O -0.000176 4.860919 0.183502  
C O -0.000294 4.137279 1.372285  
C O -0.000209 2.740717 1.329923  
C O -0.000286 1.986105 2.544506  
Cl O 0.000260 2.010879 -2.641193  
N O -0.000346 1.379526 3.526690  
H O -6.547661 -2.358183 -0.048731  
H O -5.035591 -4.315585 -0.057051  
H O -2.587703 -4.018006 -0.032169  
H O -5.640489 -0.055268 -0.014768  
H O 2.587812 -4.017926 -0.032163  
H O 5.035706 -4.315460 -0.056968  
H O 6.547738 -2.358027 -0.048551  
H O 5.640523 -0.055134 -0.014544  
H O 0.000109 4.780041 -1.969091  
H O -0.000233 5.943514 0.214837  
H O -0.000438 4.641223 2.329785

SCF Done: E(UB3LYP) = -  
2647.51235209

Sum of electronic and zero-point  
Energies= -2647.238999

Sum of electronic and thermal Energies=  
-2647.215738

Sum of electronic and thermal  
Enthalpies= -2647.214794

Sum of electronic and thermal Free  
Energies= -2647.293751

### 6.1.8 *anti-anti-N-ortho,ortho'*-cyanofluorophenyl-BBTT 3I

#### 6.1.8.1 Minimum geometry of native BBTT in gas phase (B3LYP/6-311++G\*\*)

Conformer I:

#p opt freq=noraman rb3lyp/6-311++g(d,p)  
pop=full

0 1  
C 0 -5.356981 -2.326538 -0.419512  
C 0 -4.514798 -3.290112 0.156053  
C 0 -3.178064 -3.011382 0.400761  
C 0 -2.663153 -1.749417 0.065692  
C 0 -3.524061 -0.793477 -0.521919  
C 0 -4.869309 -1.070772 -0.762244  
C 0 -1.334613 -1.224624 0.253513  
C 0 -1.194882 0.053578 -0.186227  
S 0 -2.676791 0.699908 -0.900965  
S 0 -0.000027 -2.150230 0.984930  
C 0 1.334620 -1.224570 0.253683  
C 0 1.194958 0.053675 -0.186040  
N 0 0.000017 0.801744 -0.213401  
C 0 2.663185 -1.749367 0.066035  
C 0 3.524199 -0.793469 -0.521426  
S 0 2.676937 0.700001 -0.900615  
C 0 3.178068 -3.011469 0.401089  
C 0 4.514781 -3.290200 0.156386  
C 0 5.357037 -2.326604 -0.419105  
C 0 4.869447 -1.070807 -0.761757  
C 0 -0.000094 2.119083 0.351834  
C 0 0.000315 3.261576 -0.469152  
C 0 0.000227 4.545107 0.095658  
C 0 -0.000294 4.694088 1.477134  
C 0 -0.000725 3.576113 2.307743  
C 0 -0.000612 2.314804 1.733505  
F 0 -0.000995 1.237455 2.534528  
C 0 0.000767 3.124186 -1.894616  
N 0 0.001097 3.067496 -3.048120  
H 0 -6.398561 -2.562735 -0.603629  
H 0 -4.914445 -4.264529 0.411939  
H 0 -2.531388 -3.760899 0.842669  
H 0 -5.518373 -0.328588 -1.212042  
H 0 2.531320 -3.760950 0.842898  
H 0 4.914412 -4.264649 0.412179

H 0 6.398594 -2.562882 -0.603225  
H 0 5.518551 -0.328600 -1.211457  
H 0 0.000539 5.409702 -0.555080  
H 0 -0.000366 5.685860 1.912457  
H 0 -0.001126 3.665219 3.387040

SCF Done: E(RB3LYP) = -  
2287.30139835

Sum of electronic and zero-point  
Energies= -2287.027198

Sum of electronic and thermal Energies=  
-2287.004215

Sum of electronic and thermal  
Enthalpies= -2287.003271

Sum of electronic and thermal Free  
Energies= -2287.081508

Conformer II:

#p opt freq=noraman rb3lyp/6-311++g(d,p)  
pop=full

0 1  
C 0 5.346475 -2.329077 -0.506265  
C 0 4.500825 -3.324606 0.005271  
C 0 3.166734 -3.056530 0.276649  
C 0 2.655961 -1.772225 0.031015  
C 0 3.521382 -0.784841 -0.494088  
C 0 4.863397 -1.049569 -0.759008  
C 0 1.333106 -1.255308 0.264384  
C 0 1.198524 0.050044 -0.090763  
S 0 2.681339 0.740346 -0.758858  
S 0 -0.000785 -2.198130 0.983715  
C 0 -1.334271 -1.254564 0.264570  
C 0 -1.199114 0.050766 -0.090516  
N 0 -0.000077 0.779664 -0.054028  
C 0 -2.657664 -1.770554 0.032499  
C 0 -3.522916 -0.782494 -0.491766  
S 0 -2.682154 0.742083 -0.757102  
C 0 -3.169132 -3.054485 0.278614  
C 0 -4.503647 -3.321607 0.008542  
C 0 -5.349048 -2.325491 -0.502306  
C 0 -4.865226 -1.046294 -0.755523

|     |           |           |           |                                         |           |           |           |
|-----|-----------|-----------|-----------|-----------------------------------------|-----------|-----------|-----------|
| C 0 | 0.000608  | 2.197781  | 0.065864  | H 0                                     | -4.899354 | -4.313065 | 0.196232  |
| C 0 | 0.004274  | 2.833020  | 1.324917  | H 0                                     | -6.389145 | -2.552618 | -0.705293 |
| C 0 | 0.005302  | 4.229619  | 1.417419  | H 0                                     | -5.516456 | -0.277092 | -1.154056 |
| C 0 | 0.002461  | 5.001416  | 0.259779  | H 0                                     | 0.008209  | 4.696125  | 2.393915  |
| C 0 | -0.001199 | 4.395899  | -0.992214 | H 0                                     | 0.003184  | 6.082047  | 0.333130  |
| C 0 | -0.001973 | 3.010119  | -1.068024 | H 0                                     | -0.003306 | 4.973792  | -1.907888 |
| F 0 | -0.005159 | 2.430816  | -2.279902 | SCF Done: E(RB3LYP) = -                 |           |           |           |
| C 0 | 0.006959  | 2.049383  | 2.522404  | 2287.30039449                           |           |           |           |
| N 0 | 0.009164  | 1.453954  | 3.511649  | Sum of electronic and zero-point        |           |           |           |
| H 0 | 6.386146  | -2.556983 | -0.710179 | Energies= -2287.026384                  |           |           |           |
| H 0 | 4.895938  | -4.316420 | 0.192335  | Sum of electronic and thermal Energies= |           |           |           |
| H 0 | 2.517858  | -3.830245 | 0.670791  | -2287.003239                            |           |           |           |
| H 0 | 5.514784  | -0.280718 | -1.157937 | Sum of electronic and thermal           |           |           |           |
| H 0 | -2.520338 | -3.828694 | 0.671925  | Enthalpies= -2287.002294                |           |           |           |
|     |           |           |           | Sum of electronic and thermal Free      |           |           |           |
|     |           |           |           | Energies= -2287.082139                  |           |           |           |

### 6.1.8.2 Minimum geometry of native BBT under IEFPCM variation of PCM

(B3LYP/6-311++G\*\*, IEFPCM CH<sub>2</sub>Cl<sub>2</sub>)

|                                          |           |           |           |           |           |           |           |
|------------------------------------------|-----------|-----------|-----------|-----------|-----------|-----------|-----------|
| Conformer I:                             | C 0       | 3.534803  | -0.784037 | -0.485320 |           |           |           |
| #p opt freq=noraman rb3lyp/6-311++g(d,p) | S 0       | 2.687825  | 0.721705  | -0.821456 |           |           |           |
| pop=full Guess=Read geom=chec            | C 0       | 3.183452  | -3.030568 | 0.365019  |           |           |           |
| k                                        | C 0       | 4.525078  | -3.297408 | 0.128689  |           |           |           |
| SCRF=(IEFPCM,Solvent=Dichloromethan      | C 0       | 5.371761  | -2.313641 | -0.406184 |           |           |           |
| e)                                       | C 0       | 4.884652  | -1.048050 | -0.716167 |           |           |           |
| 0 1                                      | C 0       | -0.000004 | 2.125932  | 0.339641  |           |           |           |
| C 0                                      | -5.371749 | -2.313664 | -0.406180 | C 0       | -0.000011 | 3.242238  | -0.517868 |
| C 0                                      | -4.525063 | -3.297426 | 0.128693  | C 0       | -0.000015 | 4.543418  | 0.003223  |
| C 0                                      | -3.183437 | -3.030580 | 0.365022  | C 0       | -0.000012 | 4.735345  | 1.380193  |
| C 0                                      | -2.668625 | -1.759909 | 0.060713  | C 0       | -0.000006 | 3.644971  | 2.246697  |
| C 0                                      | -3.534798 | -0.784050 | -0.485318 | C 0       | -0.000002 | 2.366648  | 1.712368  |
| C 0                                      | -4.884645 | -1.048070 | -0.716164 | F 0       | 0.000004  | 1.309415  | 2.546458  |
| C 0                                      | -1.335774 | -1.244644 | 0.247446  | C 0       | -0.000017 | 3.052873  | -1.936745 |
| C 0                                      | -1.196134 | 0.046182  | -0.154406 | N 0       | -0.000022 | 2.940972  | -3.086551 |
| S 0                                      | -2.687826 | 0.721694  | -0.821455 | H 0       | -6.416508 | -2.540555 | -0.583257 |
| S 0                                      | 0.000006  | -2.198215 | 0.944699  | H 0       | -4.924743 | -4.277755 | 0.360608  |
| C 0                                      | 1.335782  | -1.244639 | 0.247444  | H 0       | -2.536036 | -3.795522 | 0.778459  |
| C 0                                      | 1.196136  | 0.046186  | -0.154408 | H 0       | -5.537420 | -0.290012 | -1.132312 |
| N 0                                      | -0.000001 | 0.789877  | -0.180604 | H 0       | 2.536053  | -3.795512 | 0.778455  |
| C 0                                      | 2.668634  | -1.759898 | 0.060710  |           |           |           |           |

H O 4.924763 -4.277734 0.360604  
H O 6.416521 -2.540530 -0.583260  
H O 5.537423 -0.289989 -1.132315  
H O -0.000022 5.388705 -0.671854  
H O -0.000016 5.739901 1.783675  
H O -0.000004 3.772114 3.321966

SCF Done: E(RB3LYP) = -  
2287.31347154

Sum of electronic and zero-point  
Energies= -2287.039285

Sum of electronic and thermal Energies=  
-2287.016303

Sum of electronic and thermal  
Enthalpies= -2287.015358

Sum of electronic and thermal Free  
Energies= -2287.093533

Conformer II:

#p opt freq=noraman rb3lyp/6-311++g(d,p)  
pop=full Guess=Read geom=chec

k  
SCRF=(IEFPCM,Solvent=Dichloromethan  
e)

0 1

C O 5.358207 -2.309016 -0.510374  
C O 4.512129 -3.329704 -0.049581  
C O 3.174563 -3.078467 0.225711  
C O 2.661036 -1.785051 0.034247  
C O 3.528025 -0.771885 -0.437932  
C O 4.872928 -1.019464 -0.706971  
C O 1.334281 -1.282489 0.276829  
C O 1.198347 0.037912 -0.021208  
S O 2.687131 0.764853 -0.631583  
S O -0.000029 -2.258467 0.954546  
C O -1.334294 -1.282467 0.276798  
C O -1.198359 0.037935 -0.021228  
N O -0.000002 0.764933 0.047181  
C O -2.661074 -1.784994 0.034292

C O -3.528065 -0.771835 -0.437885  
S O -2.687154 0.764900 -0.631552  
C O -3.174586 -3.078412 0.225789  
C O -4.512157 -3.329654 -0.049480  
C O -5.358240 -2.308973 -0.510281  
C O -4.872970 -1.019421 -0.706905  
C O 0.000016 2.189390 0.053750  
C O 0.000096 2.914362 1.263315  
C O 0.000121 4.313105 1.257385  
C O 0.000046 4.997939 0.045221  
C O -0.000043 4.303813 -1.159871  
C O -0.000049 2.916519 -1.134917  
F O -0.000144 2.244726 -2.302047  
C O 0.000156 2.209308 2.508190  
N O 0.000209 1.664703 3.526698  
H O 6.399750 -2.524215 -0.718062  
H O 4.909131 -4.327841 0.094859  
H O 2.528160 -3.872331 0.582253  
H O 5.524338 -0.231208 -1.065423  
H O -2.528173 -3.872265 0.582336  
H O -4.909160 -4.327788 0.094981  
H O -6.399785 -2.524178 -0.717954  
H O -5.524387 -0.231177 -1.065370  
H O 0.000187 4.852330 2.195271  
H O 0.000055 6.080480 0.039594  
H O -0.000103 4.816933 -2.113132

SCF Done: E(RB3LYP) = -  
2287.31318713

Sum of electronic and zero-point  
Energies= -2287.039163

Sum of electronic and thermal Energies=  
-2287.016065

Sum of electronic and thermal  
Enthalpies= -2287.015120

Sum of electronic and thermal Free  
Energies= -2287.093910

### 6.1.8.3 Minimum geometry of native BBTT under SMD variation of PCM (B3LYP/6-311++G\*\*,

SMD CH<sub>2</sub>Cl<sub>2</sub>)

Conformer I:

```
#p opt freq=noraman rb3lyp/6-311++g(d,p)
scrf=(smd,solvent=dichloromet
 hane) pop=full geom=checkpoint
guess=read
 0 1
C 0 -5.362817 -2.327466 -0.420203
C 0 -4.517553 -3.303811 0.130362
C 0 -3.178955 -3.030774 0.376927
C 0 -2.665551 -1.760762 0.066734
C 0 -3.530495 -0.793235 -0.495648
C 0 -4.877544 -1.062647 -0.736535
C 0 -1.336220 -1.237877 0.261011
C 0 -1.195278 0.049482 -0.151241
S 0 -2.684104 0.712194 -0.840312
S 0 -0.000001 -2.178395 0.976712
C 0 1.336220 -1.237878 0.261011
C 0 1.195277 0.049481 -0.151241
N 0 0.000000 0.794190 -0.173738
C 0 2.665550 -1.760762 0.066735
C 0 3.530494 -0.793236 -0.495648
S 0 2.684104 0.712193 -0.840312
C 0 3.178954 -3.030775 0.376928
C 0 4.517552 -3.303812 0.130363
C 0 5.362816 -2.327467 -0.420203
C 0 4.877544 -1.062648 -0.736535
C 0 0.000000 2.132500 0.343522
C 0 0.000001 3.249116 -0.514603
C 0 0.000001 4.550848 0.004752
C 0 0.000001 4.743522 1.381690
C 0 0.000000 3.653916 2.249100
C 0 0.000000 2.375961 1.715139
F 0 -0.000000 1.317598 2.551326
C 0 0.000001 3.060098 -1.932845
N 0 0.000002 2.946146 -3.082364
H 0 -6.405384 -2.559725 -0.605110
H 0 -4.915811 -4.283939 0.367131
H 0 -2.534643 -3.791723 0.802951
```

```
H 0 -5.530153 -0.310915 -1.165356
H 0 2.534642 -3.791724 0.802951
H 0 4.915810 -4.283941 0.367131
H 0 6.405383 -2.559727 -0.605109
H 0 5.530152 -0.310917 -1.165356
H 0 0.000002 5.394752 -0.672740
H 0 0.000001 5.748671 1.784636
H 0 0.000000 3.781951 3.324798
```

SCF Done: E(RB3LYP) = -  
2287.33540914

Sum of electronic and zero-point  
Energies= -2287.061403

Sum of electronic and thermal Energies=  
-2287.038409

Sum of electronic and thermal  
Enthalpies= -2287.037465

Sum of electronic and thermal Free  
Energies= -2287.115586

Conformer II:

```
#p opt freq=noraman rb3lyp/6-311++g(d,p)
scrf=(smd,solvent=dichloromet
 hane) pop=full geom=checkpoint
guess=read
 0 1
C 0 5.355821 -2.319377 -0.505151
C 0 4.509479 -3.328183 -0.019188
C 0 3.172413 -3.069784 0.252364
C 0 2.659512 -1.780939 0.029942
C 0 3.526989 -0.780442 -0.467731
C 0 4.871631 -1.034365 -0.732500
C 0 1.335052 -1.268887 0.267961
C 0 1.197727 0.044613 -0.057978
S 0 2.685791 0.752483 -0.697628
S 0 -0.000159 -2.225439 0.972355
C 0 -1.335092 -1.268872 0.267488
C 0 -1.197723 0.044693 -0.058211
N 0 0.000017 0.772407 -0.004038
C 0 -2.659568 -1.780843 0.029405
C 0 -3.527099 -0.780190 -0.467864
S 0 -2.685835 0.752754 -0.697563
```

|     |           |           |           |                                         |           |           |           |
|-----|-----------|-----------|-----------|-----------------------------------------|-----------|-----------|-----------|
| C O | -3.172501 | -3.069711 | 0.251632  | H O                                     | 5.524129  | -0.255582 | -1.110464 |
| C O | -4.509661 | -3.327964 | -0.019598 | H O                                     | -2.528030 | -3.856164 | 0.628371  |
| C O | -5.356069 | -2.318982 | -0.505073 | H O                                     | -4.906171 | -4.322969 | 0.148199  |
| C O | -4.871827 | -1.033970 | -0.732326 | H O                                     | -6.397504 | -2.540120 | -0.708715 |
| C O | 0.000097  | 2.196874  | 0.061812  | H O                                     | -5.524374 | -0.255078 | -1.109977 |
| C O | 0.000040  | 2.878382  | 1.297724  | H O                                     | -0.000070 | 4.780307  | 2.299881  |
| C O | 0.000059  | 4.276217  | 1.342175  | H O                                     | 0.000363  | 6.086917  | 0.188897  |
| C O | 0.000295  | 5.004398  | 0.155149  | H O                                     | 0.000668  | 4.901526  | -2.009252 |
| C O | 0.000435  | 4.354766  | -1.074320 | SCF Done: E(RB3LYP) = -                 |           |           |           |
| C O | 0.000311  | 2.967841  | -1.097880 | 2287.33561944                           |           |           |           |
| F O | 0.000617  | 2.336847  | -2.290644 | Sum of electronic and zero-point        |           |           |           |
| C O | -0.000242 | 2.130800  | 2.516891  | Energies= -2287.061635                  |           |           |           |
| N O | -0.000445 | 1.549911  | 3.514984  | Sum of electronic and thermal Energies= |           |           |           |
| H O | 6.397170  | -2.540653 | -0.709084 | -2287.038590                            |           |           |           |
| H O | 4.905981  | -4.323166 | 0.148747  | Sum of electronic and thermal           |           |           |           |
| H O | 2.528049  | -3.856075 | 0.629623  | Enthalpies= -2287.037646                |           |           |           |
|     |           |           |           | Sum of electronic and thermal Free      |           |           |           |
|     |           |           |           | Energies= -2287.115768                  |           |           |           |

#### 6.1.8.4 Minimum geometry of radical cation of BBTT in gas phase (B3LYP/6-311++G\*\*)

#p opt freq=norman ub3lyp/6-311++g(d,p) pop=full

|     |           |           |           |     |           |           |           |
|-----|-----------|-----------|-----------|-----|-----------|-----------|-----------|
| 0 1 |           |           |           | C O | -4.623614 | -3.248120 | -0.004790 |
| C O | 5.478474  | -2.136432 | -0.043690 | C O | -5.478819 | -2.135954 | -0.041537 |
| C O | 4.623187  | -3.248538 | -0.006932 | C O | -4.971847 | -0.840782 | -0.078928 |
| C O | 3.247757  | -3.086664 | -0.005528 | C O | 0.000021  | 2.136576  | -0.112109 |
| C O | 2.711500  | -1.787745 | -0.041577 | C O | 0.001507  | 2.874052  | 1.088366  |
| C O | 3.590125  | -0.682234 | -0.078712 | C O | 0.001536  | 4.270960  | 1.037271  |
| C O | 4.971601  | -0.841199 | -0.080149 | C O | 0.000052  | 4.920576  | -0.195753 |
| C O | 1.337885  | -1.366769 | -0.045975 | C O | -0.001456 | 4.199579  | -1.385875 |
| C O | 1.198220  | 0.012563  | -0.084130 | C O | -0.001478 | 2.813434  | -1.328167 |
| S O | 2.726016  | 0.858506  | -0.118740 | F O | -0.002733 | 2.097169  | -2.459506 |
| S O | -0.000194 | -2.483640 | 0.000553  | C O | 0.002942  | 2.180277  | 2.338253  |
| C O | -1.338163 | -1.366673 | -0.046606 | N O | 0.003869  | 1.598015  | 3.335157  |
| C O | -1.198394 | 0.012663  | -0.085032 | H O | 6.551338  | -2.285746 | -0.043076 |
| N O | -0.000064 | 0.696178  | -0.092812 | H O | 5.045188  | -4.245424 | 0.021568  |
| C O | -2.711807 | -1.787527 | -0.041435 | H O | 2.596886  | -3.953047 | 0.024176  |
| C O | -3.590360 | -0.681945 | -0.078219 | H O | 5.636695  | 0.013090  | -0.107328 |
| S O | -2.726130 | 0.858732  | -0.118261 | H O | -2.597360 | -3.952828 | 0.024737  |
| C O | -3.248166 | -3.086381 | -0.004558 | H O | -5.045687 | -4.244950 | 0.024595  |
|     |           |           |           | H O | -6.551696 | -2.285170 | -0.040318 |
|     |           |           |           | H O | -5.636877 | 0.013547  | -0.106432 |

|                                  |              |          |           |  |                                         |
|----------------------------------|--------------|----------|-----------|--|-----------------------------------------|
| H O                              | 0.002737     | 4.835434 | 1.960430  |  | Sum of electronic and thermal Energies= |
| H O                              | 0.000062     | 6.003029 | -0.229035 |  | -2286.777629                            |
| H O                              | -0.002607    | 4.688333 | -2.352122 |  | Sum of electronic and thermal           |
|                                  |              |          |           |  | Enthalpies=                             |
|                                  |              |          |           |  | -2286.776685                            |
| SCF Done: E(UB3LYP) =            | -            |          |           |  | Sum of electronic and thermal Free      |
| 2287.07531311                    |              |          |           |  | Energies=                               |
|                                  |              |          |           |  | -2286.854922                            |
| Sum of electronic and zero-point |              |          |           |  |                                         |
| Energies=                        | -2286.800607 |          |           |  |                                         |

### 6.1.8.5 Minimum geometry of radical cation of BBTT under SMD variation of PCM

(B3LYP/6-311++G\*\*, SMD CH<sub>2</sub>Cl<sub>2</sub>)

|                               |     |           |           |           |                                         |
|-------------------------------|-----|-----------|-----------|-----------|-----------------------------------------|
| #p opt freq=noraman ub3lyp/6- | C O | -0.000036 | 4.319054  | 0.931718  |                                         |
| 311++g(d,p) pop=full          | C O | 0.000208  | 4.913235  | -0.328543 |                                         |
| scrf=(SMD,solvent=di          | C O | 0.000356  | 4.140287  | -1.484518 |                                         |
| chloromethane)                | C O | 0.000253  | 2.759712  | -1.362820 |                                         |
| 0 1                           | F O | 0.000426  | 1.991462  | -2.465975 |                                         |
| C O                           | C O | -0.000334 | 2.310853  | 2.334739  |                                         |
| 5.474365                      | N O | -0.000452 | 1.822390  | 3.380703  |                                         |
| -2.150874                     | H O | 6.547037  | -2.303745 | -0.048108 |                                         |
| -0.042786                     | H O | 5.034076  | -4.259856 | -0.000355 |                                         |
| C O                           | H O | 2.586278  | -3.960554 | 0.014666  |                                         |
| 4.615428                      | H O | 5.640938  | -0.000456 | -0.084260 |                                         |
| -3.260876                     | H O | -2.586443 | -3.960487 | 0.014596  |                                         |
| -0.015406                     | H O | -5.034240 | -4.259687 | -0.000525 |                                         |
| C O                           | H O | -6.547135 | -2.303528 | -0.048320 |                                         |
| 3.239648                      | H O | -5.640934 | -0.000259 | -0.084409 |                                         |
| -3.095565                     | H O | -0.000187 | 4.923949  | 1.828804  |                                         |
| -0.006784                     | H O | 0.000306  | 5.992988  | -0.409441 |                                         |
| C O                           | H O | 0.000560  | 4.585950  | -2.471641 |                                         |
| 2.709426                      |     |           |           |           | SCF Done: E(UB3LYP) =                   |
| -1.793942                     |     |           |           |           | -2287.15720050                          |
| -0.026125                     |     |           |           |           | Sum of electronic and zero-point        |
| C O                           |     |           |           |           | Energies=                               |
| 3.590784                      |     |           |           |           | -2286.882213                            |
| -0.690850                     |     |           |           |           | Sum of electronic and thermal Energies= |
| -0.055343                     |     |           |           |           | -2286.859411                            |
| C O                           |     |           |           |           | Sum of electronic and thermal           |
| 4.972471                      |     |           |           |           | Enthalpies=                             |
| -0.852769                     |     |           |           |           | -2286.858466                            |
| -0.063312                     |     |           |           |           | Sum of electronic and thermal Free      |
| C O                           |     |           |           |           | Energies=                               |
| 1.336633                      |     |           |           |           | -2286.935886                            |
| -1.369968                     |     |           |           |           |                                         |
| -0.023597                     |     |           |           |           |                                         |
| C O                           |     |           |           |           |                                         |
| 1.197147                      |     |           |           |           |                                         |
| 0.008514                      |     |           |           |           |                                         |
| -0.048727                     |     |           |           |           |                                         |
| S O                           |     |           |           |           |                                         |
| 2.729005                      |     |           |           |           |                                         |
| 0.852336                      |     |           |           |           |                                         |
| -0.079106                     |     |           |           |           |                                         |
| S O                           |     |           |           |           |                                         |
| -0.000042                     |     |           |           |           |                                         |
| -2.487629                     |     |           |           |           |                                         |
| 0.001148                      |     |           |           |           |                                         |
| C O                           |     |           |           |           |                                         |
| -1.336681                     |     |           |           |           |                                         |
| -1.369930                     |     |           |           |           |                                         |
| -0.023720                     |     |           |           |           |                                         |
| C O                           |     |           |           |           |                                         |
| -1.197145                     |     |           |           |           |                                         |
| 0.008546                      |     |           |           |           |                                         |
| -0.048844                     |     |           |           |           |                                         |
| N O                           |     |           |           |           |                                         |
| 0.000006                      |     |           |           |           |                                         |
| 0.693189                      |     |           |           |           |                                         |
| -0.051523                     |     |           |           |           |                                         |
| C O                           |     |           |           |           |                                         |
| -2.709493                     |     |           |           |           |                                         |
| -1.793865                     |     |           |           |           |                                         |
| -0.026261                     |     |           |           |           |                                         |
| C O                           |     |           |           |           |                                         |
| -3.590822                     |     |           |           |           |                                         |
| -0.690757                     |     |           |           |           |                                         |
| -0.055495                     |     |           |           |           |                                         |
| S O                           |     |           |           |           |                                         |
| -2.728963                     |     |           |           |           |                                         |
| 0.852438                      |     |           |           |           |                                         |
| -0.079207                     |     |           |           |           |                                         |
| C O                           |     |           |           |           |                                         |
| -3.239768                     |     |           |           |           |                                         |
| -3.095466                     |     |           |           |           |                                         |
| -0.006919                     |     |           |           |           |                                         |
| C O                           |     |           |           |           |                                         |
| -4.615558                     |     |           |           |           |                                         |
| -3.260721                     |     |           |           |           |                                         |
| -0.015567                     |     |           |           |           |                                         |
| C O                           |     |           |           |           |                                         |
| -5.474458                     |     |           |           |           |                                         |
| -2.150693                     |     |           |           |           |                                         |
| -0.042969                     |     |           |           |           |                                         |
| C O                           |     |           |           |           |                                         |
| -4.972511                     |     |           |           |           |                                         |
| -0.852605                     |     |           |           |           |                                         |
| -0.063483                     |     |           |           |           |                                         |
| C O                           |     |           |           |           |                                         |
| 0.000034                      |     |           |           |           |                                         |
| 2.132690                      |     |           |           |           |                                         |
| -0.120906                     |     |           |           |           |                                         |
| C O                           |     |           |           |           |                                         |
| -0.000107                     |     |           |           |           |                                         |
| 2.925851                      |     |           |           |           |                                         |
| 1.044528                      |     |           |           |           |                                         |

### 6.1.9 *anti-anti-N-ortho,ortho'*-cyanomethylphenyl-BBTT 3m

#### 6.1.9.1 Minimum geometry of native BBTT in gas phase (B3LYP/6-311++G\*\*)



Conformer I:  
 #p opt freq=noraman rb3lyp/6-311++g(d,p)  
 pop=full  
 0 1  
 C 0 -5.387582 -2.278712 -0.404730  
 C 0 -4.535088 -3.301275 0.037713  
 C 0 -3.188431 -3.057135 0.266351  
 C 0 -2.672782 -1.769678 0.047602  
 C 0 -3.545252 -0.753769 -0.407177  
 C 0 -4.899574 -0.995971 -0.629475  
 C 0 -1.336283 -1.274638 0.247261  
 C 0 -1.196520 0.042163 -0.066056  
 S 0 -2.699297 0.770123 -0.646814  
 S 0 0.000006 -2.271942 0.884312  
 C 0 1.336290 -1.274618 0.247301  
 C 0 1.196514 0.042170 -0.066006  
 N 0 -0.000015 0.774594 -0.062005  
 C 0 2.672831 -1.769638 0.047649  
 C 0 3.545270 -0.753717 -0.407121  
 S 0 2.699314 0.770189 -0.646713  
 C 0 3.188453 -3.057107 0.266284  
 C 0 4.535117 -3.301263 0.037542  
 C 0 5.387575 -2.278690 -0.404922  
 C 0 4.899566 -0.995934 -0.629560  
 C 0 -0.000010 2.157884 0.334918  
 C 0 -0.000101 3.154205 -0.658572  
 C 0 -0.000124 4.508813 -0.297583  
 C 0 -0.000028 4.854809 1.046030  
 C 0 0.000092 3.864135 2.025305  
 C 0 0.000092 2.505386 1.694659  
 C 0 0.000158 1.446890 2.766516  
 C 0 -0.000129 2.805310 -2.047836  
 N 0 -0.000144 2.576541 -3.180098  
 H 0 -6.436483 -2.488733 -0.578342  
 H 0 -4.934112 -4.295550 0.202080  
 H 0 -2.534278 -3.852930 0.604083  
 H 0 -5.556148 -0.206899 -0.977042  
 H 0 2.534306 -3.852922 0.603981

H 0 4.934126 -4.295556 0.201824  
 H 0 6.436447 -2.488727 -0.578693  
 H 0 5.556117 -0.206864 -0.977174  
 H 0 -0.000202 5.266179 -1.070936  
 H 0 -0.000044 5.899678 1.333363  
 H 0 0.000190 4.147721 3.072211  
 H 0 0.000273 1.903305 3.757112  
 H 0 -0.878148 0.800911 2.686642  
 H 0 0.878370 0.800809 2.686476  
 SCF Done: E(RB3LYP) = -  
 2227.36672020  
 Sum of electronic and zero-point  
 Energies= -2227.056797  
 Sum of electronic and thermal Energies=  
 -2227.032994  
 Sum of electronic and thermal  
 Enthalpies= -2227.032050  
 Sum of electronic and thermal Free  
 Energies= -2227.111329

Conformer II:  
 #p opt=verytight freq=noraman rb3lyp/6-  
 311++g(d,p) pop=full  
 0 1  
 C 0 5.426812 -2.214850 -0.390754  
 C 0 4.571304 -3.279676 -0.072825  
 C 0 3.214965 -3.069381 0.133263  
 C 0 2.690531 -1.771743 0.016532  
 C 0 3.568568 -0.713050 -0.310925  
 C 0 4.930804 -0.920452 -0.511523  
 C 0 1.340545 -1.312741 0.205680  
 C 0 1.199193 0.026134 0.007283  
 S 0 2.714536 0.823388 -0.424207  
 S 0 0.007573 -2.378401 0.732505  
 C 0 -1.330444 -1.320172 0.203980  
 C 0 -1.196085 0.019488 0.006196  
 N 0 -0.000405 0.747635 0.063695  
 C 0 -2.676503 -1.787269 0.007161  
 C 0 -3.558707 -0.733984 -0.326619  
 S 0 -2.713086 0.807273 -0.437587

|     |           |           |           |                                         |           |           |           |
|-----|-----------|-----------|-----------|-----------------------------------------|-----------|-----------|-----------|
| C 0 | -3.193746 | -3.087978 | 0.121631  | H 0                                     | -4.946707 | -4.310568 | -0.005909 |
| C 0 | -4.547501 | -3.306547 | -0.092424 | H 0                                     | -6.462201 | -2.437256 | -0.576193 |
| C 0 | -5.407471 | -2.246985 | -0.416018 | H 0                                     | -5.581026 | -0.129446 | -0.785791 |
| C 0 | -4.918559 | -0.949749 | -0.534857 | H 0                                     | -0.057784 | 4.842089  | 2.142112  |
| C 0 | -0.005977 | 2.179684  | 0.005504  | H 0                                     | -0.032426 | 6.053617  | -0.031658 |
| C 0 | -0.030119 | 2.902571  | 1.217304  | H 0                                     | 0.006293  | 4.789511  | -2.147970 |
| C 0 | -0.039071 | 4.299767  | 1.205446  | H 0                                     | -0.748191 | 2.503780  | -3.204124 |
| C 0 | -0.024412 | 4.970149  | -0.013193 | H 0                                     | 0.998283  | 2.300538  | -3.049843 |
| C 0 | -0.002099 | 4.255314  | -1.203694 | H 0                                     | -0.089839 | 1.054952  | -2.437494 |
| C 0 | 0.008349  | 2.852637  | -1.224303 | SCF Done: E(RB3LYP) = -                 |           |           |           |
| C 0 | 0.041515  | 2.129370  | -2.547922 | 2227.36511570                           |           |           |           |
| C 0 | -0.045165 | 2.211824  | 2.471027  | Sum of electronic and zero-point        |           |           |           |
| N 0 | -0.057493 | 1.693722  | 3.503183  | Energies= -2227.055538                  |           |           |           |
| H 0 | 6.483602  | -2.398664 | -0.544759 | Sum of electronic and thermal Energies= |           |           |           |
| H 0 | 4.975954  | -4.281368 | 0.015375  | -2227.031463                            |           |           |           |
| H 0 | 2.560706  | -3.898296 | 0.378012  | Sum of electronic and thermal           |           |           |           |
| H 0 | 5.589824  | -0.095977 | -0.757840 | Enthalpies= -2227.030518                |           |           |           |
| H 0 | -2.535926 | -3.912731 | 0.370857  | Sum of electronic and thermal Free      |           |           |           |
|     |           |           |           | Energies= -2227.111616                  |           |           |           |

#### 6.1.9.2 Minimum geometry of native BBTT under IEFPCM variation of PCM

(B3LYP/6-311++G\*\*, IEFPCM CH<sub>2</sub>Cl<sub>2</sub>)

|                                          |           |           |           |           |           |           |           |
|------------------------------------------|-----------|-----------|-----------|-----------|-----------|-----------|-----------|
| Conformer I:                             | C 0       | 1.196821  | 0.031596  | -0.042455 |           |           |           |
| #p opt freq=noraman rb3lyp/6-311++g(d,p) | N 0       | -0.000000 | 0.761162  | -0.040340 |           |           |           |
| pop=full Guess=Read geom=chec            | C 0       | 2.682983  | -1.774149 | 0.040377  |           |           |           |
| k                                        | C 0       | 3.560299  | -0.737204 | -0.354641 |           |           |           |
| SCRF=(IEFPCM,Solvent=Dichloromethan      | S 0       | 2.710067  | 0.792532  | -0.549228 |           |           |           |
| e)                                       | C 0       | 3.202612  | -3.066158 | 0.225715  |           |           |           |
| 0 1                                      | C 0       | 4.557104  | -3.293164 | 0.020489  |           |           |           |
| C 0                                      | -5.413109 | -2.249616 | -0.364148 | C 0       | 5.413109  | -2.249614 | -0.364152 |
| C 0                                      | -4.557103 | -3.293165 | 0.020494  | C 0       | 4.921590  | -0.961254 | -0.553159 |
| C 0                                      | -3.202611 | -3.066159 | 0.225718  | C 0       | 0.000000  | 2.156648  | 0.313308  |
| C 0                                      | -2.682982 | -1.774150 | 0.040378  | C 0       | -0.000002 | 3.121009  | -0.712740 |
| C 0                                      | -3.560299 | -0.737205 | -0.354641 | C 0       | -0.000002 | 4.487157  | -0.399597 |
| C 0                                      | -4.921589 | -0.961256 | -0.553158 | C 0       | 0.000000  | 4.875390  | 0.933258  |
| C 0                                      | -1.337755 | -1.295600 | 0.223318  | C 0       | 0.000003  | 3.917325  | 1.944421  |
| C 0                                      | -1.196821 | 0.031596  | -0.042454 | C 0       | 0.000002  | 2.546841  | 1.659904  |
| S 0                                      | -2.710066 | 0.792530  | -0.549228 | C 0       | 0.000004  | 1.524712  | 2.766183  |
| S 0                                      | 0.000001  | -2.332322 | 0.794514  | C 0       | -0.000005 | 2.720146  | -2.087037 |
| C 0                                      | 1.337755  | -1.295599 | 0.223316  |           |           |           |           |

N O -0.000009 2.437855 -3.207708  
 H O -6.467444 -2.446226 -0.519032  
 H O -4.959113 -4.290030 0.159756  
 H O -2.549064 -3.878666 0.522500  
 H O -5.581060 -0.155581 -0.853351  
 H O 2.549065 -3.878666 0.522497  
 H O 4.959114 -4.290030 0.159751  
 H O 6.467444 -2.446224 -0.519037  
 H O 5.581061 -0.155579 -0.853352  
 H O -0.000004 5.220860 -1.195045  
 H O 0.000000 5.928699 1.186109  
 H O 0.000005 4.235967 2.980755  
 H O 0.000004 2.014198 3.740154  
 H O -0.879439 0.877768 2.707767  
 H O 0.879450 0.877771 2.707766  
 SCF Done: E(RB3LYP) = -  
 2227.37832470  
 Sum of electronic and zero-point  
 Energies= -2227.068536  
 Sum of electronic and thermal Energies=  
 -2227.044651  
 Sum of electronic and thermal  
 Enthalpies= -2227.043707  
 Sum of electronic and thermal Free  
 Energies= -2227.123464  
 Conformer II:  
 #p opt=verytight freq=noraman rb3lyp/6-  
 311++g(d,p) pop=full Guess=Read  
 geom=check  
 SCRF=(IEFPCM,Solvent=Dichloromethan  
 e)  
 0 1  
 C O 5.412828 -2.237153 -0.421627  
 C O 4.557838 -3.294799 -0.075579  
 C O 3.203895 -3.076884 0.143709  
 C O 2.682277 -1.778761 0.011094  
 C O 3.559840 -0.727368 -0.343652  
 C O 4.919777 -0.942273 -0.557278  
 C O 1.336671 -1.310069 0.208726  
 C O 1.196970 0.026900 -0.008620

S O 2.709616 0.810665 -0.473034  
 S O 0.000000 -2.360078 0.762177  
 C O -1.336670 -1.310069 0.208726  
 C O -1.196970 0.026900 -0.008620  
 N O 0.000000 0.750824 0.044636  
 C O -2.682277 -1.778761 0.011094  
 C O -3.559839 -0.727368 -0.343652  
 S O -2.709616 0.810665 -0.473034  
 C O -3.203894 -3.076884 0.143709  
 C O -4.557837 -3.294799 -0.075579  
 C O -5.412828 -2.237153 -0.421627  
 C O -4.919777 -0.942273 -0.557278  
 C O -0.000000 2.186214 0.014888  
 C O -0.000000 2.882038 1.244221  
 C O -0.000000 4.278416 1.269509  
 C O -0.000000 4.976757 0.065406  
 C O -0.000000 4.289971 -1.141125  
 C O -0.000000 2.886463 -1.197561  
 C O -0.000000 2.200646 -2.540835  
 C O -0.000000 2.156549 2.477305  
 N O -0.000000 1.597730 3.488785  
 H O 6.466898 -2.426844 -0.586470  
 H O 4.960495 -4.296208 0.023901  
 H O 2.552000 -3.900622 0.411640  
 H O 5.578117 -0.124527 -0.825921  
 H O -2.551999 -3.900622 0.411640  
 H O -4.960495 -4.296208 0.023901  
 H O -6.466898 -2.426844 -0.586470  
 H O -5.578117 -0.124527 -0.825921  
 H O -0.000000 4.800887 2.217279  
 H O -0.000000 6.059918 0.072547  
 H O -0.000000 4.846628 -2.071855  
 H O -0.880997 2.497889 -3.115808  
 H O 0.880998 2.497888 -3.115807  
 H O -0.000001 1.115844 -2.456477  
 SCF Done: E(RB3LYP) = -  
 2227.37757700

Sum of electronic and zero-point  
Energies= -2227.067987

Sum of electronic and thermal Energies=  
-2227.043973

Sum of electronic and thermal  
Enthalpies= -2227.043029

Sum of electronic and thermal Free  
Energies= -2227.123671

### 6.1.9.3 Minimum geometry of native BBTT under SMD variation of PCM (B3LYP/6-311++G\*\*,

#### SMD CH<sub>2</sub>Cl<sub>2</sub>)

Conformer I:

#p opt freq=noraman rb3lyp/6-311++g(d,p)  
scrf=(smd,solvent=dichloromet

hane) pop=full

0 1

C 0 -5.392903 -2.290064 -0.366956

C 0 -4.531643 -3.325027 0.029220

C 0 -3.180055 -3.087506 0.242857

C 0 -2.668584 -1.792368 0.054366

C 0 -3.552011 -0.764713 -0.350620

C 0 -4.910360 -0.998504 -0.557889

C 0 -1.328210 -1.301069 0.243833

C 0 -1.194267 0.026489 -0.024471

S 0 -2.712574 0.772266 -0.543141

S 0 0.016850 -2.322832 0.827035

C 0 1.348029 -1.286257 0.238464

C 0 1.197714 0.039478 -0.029678

N 0 -0.001866 0.762942 -0.016881

C 0 2.692325 -1.762811 0.040109

C 0 3.561478 -0.725774 -0.372071

S 0 2.703235 0.801476 -0.561671

C 0 3.219421 -3.051945 0.226967

C 0 4.572147 -3.274630 0.004862

C 0 5.419188 -2.230552 -0.397963

C 0 4.920948 -0.944735 -0.587683

C 0 -0.009877 2.164300 0.318245

C 0 -0.047703 3.114850 -0.721498

C 0 -0.065146 4.485507 -0.429398

C 0 -0.043557 4.892712 0.897634

C 0 -0.002287 3.950100 1.922029

C 0 0.015310 2.574605 1.658918

C 0 0.069535 1.574520 2.782309

C 0 -0.063098 2.696148 -2.089709

N 0 -0.074161 2.397767 -3.206084

H 0 -6.444716 -2.495920 -0.529092

H 0 -4.927082 -4.324620 0.170025

H 0 -2.524817 -3.895665 0.548636

H 0 -5.574240 -0.198887 -0.866102

H 0 2.575331 -3.866956 0.538315

H 0 4.979727 -4.269494 0.144498

H 0 6.472168 -2.424848 -0.566566

H 0 5.573882 -0.138246 -0.901293

H 0 -0.094334 5.206201 -1.236821

H 0 -0.057552 5.949862 1.135608

H 0 0.015093 4.283288 2.953846

H 0 0.000544 2.079964 3.746297

H 0 -0.746508 0.850217 2.715456

H 0 1.006164 1.009056 2.761111

SCF Done: E(RB3LYP) = -  
2227.40148536

Sum of electronic and zero-point  
Energies= -2227.091632

Sum of electronic and thermal Energies=  
-2227.067897

Sum of electronic and thermal  
Enthalpies= -2227.066953

Sum of electronic and thermal Free  
Energies= -2227.145923

Conformer II:

#p opt freq=noraman rb3lyp/6-311++g(d,p)  
scrf=(smd,solvent=dichloromet

hane) pop=full geom=checkpoint  
guess=read

0 1

C 0 5.381957 -2.278798 -0.475190

C 0 4.530683 -3.312061 -0.053711

|     |           |           |           |                                         |           |           |           |
|-----|-----------|-----------|-----------|-----------------------------------------|-----------|-----------|-----------|
| C 0 | 3.185853  | -3.073064 | 0.197647  | C 0                                     | 0.000248  | 2.099838  | 2.504545  |
| C 0 | 2.669465  | -1.778092 | 0.020083  | N 0                                     | 0.000368  | 1.510949  | 3.498692  |
| C 0 | 3.543038  | -0.752364 | -0.411291 | H 0                                     | 6.429077  | -2.485448 | -0.664379 |
| C 0 | 4.894696  | -0.987245 | -0.655757 | H 0                                     | 4.929234  | -4.311530 | 0.079273  |
| C 0 | 1.335565  | -1.285797 | 0.242810  | H 0                                     | 2.538695  | -3.879329 | 0.524804  |
| C 0 | 1.195727  | 0.040914  | -0.030098 | H 0                                     | 5.550570  | -0.188263 | -0.982492 |
| S 0 | 2.699535  | 0.785836  | -0.587674 | H 0                                     | -2.538664 | -3.879346 | 0.524875  |
| S 0 | 0.000017  | -2.286071 | 0.884581  | H 0                                     | -4.929210 | -4.311563 | 0.079395  |
| C 0 | -1.335560 | -1.285802 | 0.242865  | H 0                                     | -6.429083 | -2.485490 | -0.664216 |
| C 0 | -1.195739 | 0.040910  | -0.030041 | H 0                                     | -5.550601 | -0.188297 | -0.982339 |
| N 0 | -0.000007 | 0.767036  | 0.019978  | H 0                                     | 0.000184  | 4.745261  | 2.331057  |
| C 0 | -2.669463 | -1.778107 | 0.020170  | H 0                                     | -0.000045 | 6.076192  | 0.228266  |
| C 0 | -3.543053 | -0.752383 | -0.411181 | H 0                                     | -0.000253 | 4.933231  | -1.956270 |
| S 0 | -2.699566 | 0.785823  | -0.587579 | H 0                                     | -0.880873 | 2.629344  | -3.078434 |
| C 0 | -3.185836 | -3.073084 | 0.197738  | H 0                                     | 0.880154  | 2.629353  | -3.078637 |
| C 0 | -4.530669 | -3.312090 | -0.053592 | H 0                                     | -0.000284 | 1.221765  | -2.475084 |
| C 0 | -5.381961 | -2.278832 | -0.475048 | SCF Done: E(RB3LYP) = -                 |           |           |           |
| C 0 | -4.894715 | -0.987274 | -0.655620 | 2227.40112348                           |           |           |           |
| C 0 | -0.000013 | 2.204452  | 0.041151  | Sum of electronic and zero-point        |           |           |           |
| C 0 | 0.000100  | 2.860921  | 1.293777  | Energies=                               |           |           |           |
| C 0 | 0.000091  | 4.255557  | 1.365538  | -2227.091307                            |           |           |           |
| C 0 | -0.000035 | 4.993395  | 0.184854  | Sum of electronic and thermal Energies= |           |           |           |
| C 0 | -0.000149 | 4.347058  | -1.043425 | -2227.067556                            |           |           |           |
| C 0 | -0.000140 | 2.945419  | -1.146824 | Sum of electronic and thermal           |           |           |           |
| C 0 | -0.000292 | 2.309667  | -2.513693 | Enthalpies=                             |           |           |           |
|     |           |           |           | -2227.066612                            |           |           |           |
|     |           |           |           | Sum of electronic and thermal Free      |           |           |           |
|     |           |           |           | Energies=                               |           |           |           |
|     |           |           |           | -2227.145356                            |           |           |           |

#### 6.1.9.4 Minimum geometry of radical cation of BBTT in gas phase (B3LYP/6-311++G\*\*)

|                               |          |           |           |           |           |           |           |
|-------------------------------|----------|-----------|-----------|-----------|-----------|-----------|-----------|
| #p opt freq=noraman ub3lyp/6- | S 0      | 2.724632  | 0.871852  | -0.114048 |           |           |           |
| 311++g(d,p) pop=full          | S 0      | -0.000004 | -2.474662 | -0.042094 |           |           |           |
| 0 1                           | C 0      | -1.337665 | -1.355622 | -0.070680 |           |           |           |
| C 0                           | 5.478592 | -2.121164 | -0.011983 | C 0       | -1.195371 | 0.023997  | -0.106204 |
| C 0                           | 4.623983 | -3.234283 | 0.009372  | N 0       | 0.000000  | 0.708037  | -0.131479 |
| C 0                           | 3.248503 | -3.073704 | -0.008608 | C 0       | -2.711499 | -1.775167 | -0.049312 |
| C 0                           | 2.711492 | -1.775177 | -0.049301 | C 0       | -3.589047 | -0.668334 | -0.070785 |
| C 0                           | 3.589049 | -0.668352 | -0.070766 | S 0       | -2.724630 | 0.871852  | -0.114062 |
| C 0                           | 4.970741 | -0.826517 | -0.052133 | C 0       | -3.248518 | -3.073691 | -0.008622 |
| C 0                           | 1.337660 | -1.355625 | -0.070682 | C 0       | -4.623999 | -3.234261 | 0.009348  |
| C 0                           | 1.195370 | 0.023994  | -0.106210 | C 0       | -5.478601 | -2.121136 | -0.012013 |

|     |           |           |           |                                         |           |           |           |
|-----|-----------|-----------|-----------|-----------------------------------------|-----------|-----------|-----------|
| C O | -4.970741 | -0.826493 | -0.052160 | H O                                     | -6.551502 | -2.269379 | 0.004358  |
| C O | 0.000004  | 2.160898  | -0.119424 | H O                                     | -5.635255 | 0.028632  | -0.065798 |
| C O | -0.000018 | 2.811446  | 1.130121  | H O                                     | -0.000024 | 4.712789  | 2.131006  |
| C O | -0.000007 | 4.208293  | 1.173474  | H O                                     | 0.000038  | 6.008525  | 0.009124  |
| C O | 0.000027  | 4.925598  | -0.018230 | H O                                     | 0.000072  | 4.841728  | -2.160703 |
| C O | 0.000048  | 4.265247  | -1.242860 | H O                                     | 0.000051  | 2.892750  | -3.473690 |
| C O | 0.000036  | 2.866186  | -1.327069 | H O                                     | 0.882538  | 1.531506  | -2.782282 |
| C O | 0.000051  | 2.165771  | -2.662033 | H O                                     | -0.882423 | 1.531491  | -2.782295 |
| C O | -0.000044 | 2.040233  | 2.334223  | SCF Done: E(UB3LYP) = -                 |           |           |           |
| N O | -0.000064 | 1.393141  | 3.290712  | 2227.14376359                           |           |           |           |
| H O | 6.551492  | -2.269414 | 0.004394  | Sum of electronic and zero-point        |           |           |           |
| H O | 5.046576  | -4.230805 | 0.042112  | Energies= -2226.833475                  |           |           |           |
| H O | 2.598033  | -3.940691 | 0.010668  | Sum of electronic and thermal Energies= |           |           |           |
| H O | 5.635260  | 0.028604  | -0.065767 | -2226.809603                            |           |           |           |
| H O | -2.598054 | -3.940681 | 0.010659  | Sum of electronic and thermal           |           |           |           |
| H O | -5.046599 | -4.230781 | 0.042086  | Enthalpies= -2226.808659                |           |           |           |
|     |           |           |           | Sum of electronic and thermal Free      |           |           |           |
|     |           |           |           | Energies= -2226.888544                  |           |           |           |

#### 6.1.9.5 Minimum geometry of radical cation of BBTT under SMD variation of PCM

(B3LYP/6-311++G\*\*, SMD CH<sub>2</sub>Cl<sub>2</sub>)

```
#p opt freq=noraman ub3lyp/6-
311++g(d,p) pop=full
scrf=(SMD,solvent=di
chloromethane)
0 1
```

|     |           |           |           |     |           |           |           |
|-----|-----------|-----------|-----------|-----|-----------|-----------|-----------|
| C O | 5.478915  | -2.129079 | -0.006667 | C O | -3.587861 | -0.681532 | -0.069272 |
| C O | 4.622473  | -3.241354 | 0.009613  | S O | -2.726779 | 0.861527  | -0.101665 |
| C O | 3.246270  | -3.079520 | -0.000595 | C O | -3.236930 | -3.086703 | -0.018041 |
| C O | 2.712650  | -1.779251 | -0.027834 | C O | -4.612724 | -3.252140 | -0.018355 |
| C O | 3.591363  | -0.673475 | -0.045445 | C O | -5.471846 | -2.142071 | -0.042817 |
| C O | 4.973608  | -0.832540 | -0.034547 | C O | -4.969759 | -0.844241 | -0.068760 |
| C O | 1.339110  | -1.358617 | -0.041352 | C O | -0.001016 | 2.155182  | -0.126011 |
| C O | 1.195198  | 0.020061  | -0.068593 | C O | -0.032936 | 2.853652  | 1.101965  |
| S O | 2.726706  | 0.867447  | -0.081350 | C O | -0.039298 | 4.248980  | 1.101503  |
| S O | 0.003534  | -2.479145 | -0.028433 | C O | -0.013201 | 4.926971  | -0.115064 |
| C O | -1.334070 | -1.361143 | -0.046656 | C O | 0.019183  | 4.226348  | -1.312467 |
| C O | -1.193190 | 0.017818  | -0.073906 | C O | 0.027416  | 2.821516  | -1.352966 |
| N O | 0.000568  | 0.703131  | -0.085942 | C O | 0.079979  | 2.113259  | -2.680647 |
| C O | -2.706587 | -1.785075 | -0.043097 | C O | -0.056383 | 2.140442  | 2.340093  |
|     |           |           |           | N O | -0.075250 | 1.564126  | 3.340959  |
|     |           |           |           | H O | 6.551970  | -2.279127 | 0.003073  |
|     |           |           |           | H O | 5.043413  | -4.239282 | 0.031271  |
|     |           |           |           | H O | 2.595013  | -3.946271 | 0.013066  |

H O 5.640008 0.021634 -0.045925  
H O -2.583411 -3.951635 0.002118  
H O -5.031270 -4.251109 0.001587  
H O -6.544556 -2.294903 -0.041192  
H O -5.638364 0.008094 -0.086695  
H O -0.064120 4.785244 2.041319  
H O -0.019160 6.010383 -0.123025  
H O 0.038306 4.768283 -2.251511  
H O -0.679715 2.520341 -3.352052  
H O 1.053354 2.277501 -3.153438

H O -0.076273 1.037837 -2.601026

SCF Done: E(UB3LYP) = -  
2227.22632477

Sum of electronic and zero-point  
Energies= -2226.915769

Sum of electronic and thermal Energies=  
-2226.892133

Sum of electronic and thermal  
Enthalpies= -2226.891189

Sum of electronic and thermal Free  
Energies= -2226.970144

### 6.1.10 *anti-anti-N-ortho,ortho'*-cyanomethoxyphenyl-BBTT 3n

#### 6.1.10.1 Minimum geometry of native BBTT in gas phase (B3LYP/6-311++G\*\*)

Conformer I:

#p opt freq=noraman b3lyp/6-311++g(d,p)  
pop=full

0 1

C O 5.392328 -2.353832 -0.400550  
C O 4.540756 -3.334960 0.129139  
C O 3.192747 -3.074447 0.330615  
C O 2.674869 -1.813004 -0.003513  
C O 3.546502 -0.839164 -0.544186  
C O 4.902069 -1.097619 -0.740324  
C O 1.335251 -1.306533 0.144602  
C O 1.194609 -0.023983 -0.283166  
S O 2.696732 0.652645 -0.923873  
S O 0.000053 -2.256691 0.845933  
C O -1.335209 -1.306608 0.144620  
C O -1.194721 -0.024030 -0.283175  
N O -0.000036 0.713801 -0.352533  
C O -2.674803 -1.813123 -0.003312  
C O -3.546549 -0.839312 -0.543824  
S O -2.696809 0.652573 -0.923519  
C O -3.192581 -3.074642 0.330708  
C O -4.540595 -3.335202 0.129304  
C O -5.392268 -2.354074 -0.400223  
C O -4.902107 -1.097797 -0.739911  
C O -0.000065 2.082763 0.075967

C O -0.000330 3.122629 -0.863272  
C O -0.000389 4.463205 -0.446399  
C O -0.000169 4.748988 0.910228  
C O 0.000118 3.728634 1.860647  
C O 0.000180 2.391765 1.452214  
O O 0.000437 1.330678 2.285399  
C O -0.000482 2.830429 -2.266015  
N O -0.000571 2.651958 -3.407105  
C O 0.000673 1.551064 3.694348  
H O 6.442223 -2.576031 -0.551944  
H O 4.941473 -4.309624 0.382801  
H O 2.539117 -3.838795 0.735445  
H O 5.557920 -0.341195 -1.155398  
H O -2.538879 -3.839000 0.735400  
H O -4.941227 -4.309924 0.382862  
H O -6.442163 -2.576317 -0.551539  
H O -5.558016 -0.341385 -1.154911  
H O -0.000586 5.252992 -1.185625  
H O -0.000216 5.780780 1.241450  
H O 0.000271 3.979776 2.912585  
H O 0.000881 0.560038 4.142632  
H O 0.896970 2.094941 4.008206  
H O -0.895646 2.094714 4.008541

SCF Done: E(RB3LYP) = -  
2302.59336040

Sum of electronic and zero-point  
Energies= -2302.278647

Sum of electronic and thermal Energies=  
-2302.253850

Sum of electronic and thermal  
Enthalpies= -2302.252906

Sum of electronic and thermal Free  
Energies= -2302.334885

Conformer II:

#p opt=verytight freq=noraman b3lyp/6-311++g(d,p) pop=full

0 1

|     |           |           |           |
|-----|-----------|-----------|-----------|
| C 0 | 5.423481  | -2.273458 | -0.423585 |
| C 0 | 4.565601  | -3.366499 | -0.233289 |
| C 0 | 3.208734  | -3.179221 | -0.008619 |
| C 0 | 2.686056  | -1.875979 | 0.023850  |
| C 0 | 3.566635  | -0.787907 | -0.175618 |
| C 0 | 4.929056  | -0.973017 | -0.395541 |
| C 0 | 1.334884  | -1.439605 | 0.253432  |
| C 0 | 1.196538  | -0.087056 | 0.208138  |
| S 0 | 2.714023  | 0.751551  | -0.113987 |
| S 0 | -0.000000 | -2.558828 | 0.644254  |
| C 0 | -1.334885 | -1.439605 | 0.253432  |
| C 0 | -1.196538 | -0.087056 | 0.208138  |
| N 0 | -0.000000 | 0.629524  | 0.368168  |
| C 0 | -2.686056 | -1.875979 | 0.023850  |
| C 0 | -3.566635 | -0.787906 | -0.175618 |
| S 0 | -2.714023 | 0.751551  | -0.113987 |
| C 0 | -3.208734 | -3.179221 | -0.008619 |
| C 0 | -4.565601 | -3.366498 | -0.233289 |
| C 0 | -5.423481 | -2.273457 | -0.423584 |
| C 0 | -4.929056 | -0.973016 | -0.395540 |
| C 0 | 0.000000  | 2.053726  | 0.275396  |

|     |           |           |           |
|-----|-----------|-----------|-----------|
| C 0 | 0.000000  | 2.835130  | 1.440488  |
| C 0 | 0.000001  | 4.234446  | 1.362692  |
| C 0 | 0.000000  | 4.841082  | 0.114370  |
| C 0 | -0.000000 | 4.083698  | -1.054603 |
| C 0 | -0.000000 | 2.686010  | -0.986223 |
| O 0 | -0.000001 | 1.863715  | -2.054634 |
| C 0 | 0.000001  | 2.203029  | 2.725676  |
| N 0 | 0.000001  | 1.740408  | 3.783671  |
| C 0 | -0.000000 | 2.423968  | -3.366583 |
| H 0 | 6.480661  | -2.439915 | -0.594036 |
| H 0 | 4.968845  | -4.372336 | -0.259634 |
| H 0 | 2.552624  | -4.029884 | 0.136271  |
| H 0 | 5.589793  | -0.126531 | -0.542928 |
| H 0 | -2.552624 | -4.029884 | 0.136271  |
| H 0 | -4.968846 | -4.372336 | -0.259634 |
| H 0 | -6.480661 | -2.439915 | -0.594035 |
| H 0 | -5.589794 | -0.126531 | -0.542927 |
| H 0 | 0.000001  | 4.821519  | 2.271305  |
| H 0 | 0.000000  | 5.922457  | 0.043803  |
| H 0 | -0.000000 | 4.583495  | -2.013561 |
| H 0 | -0.000000 | 1.573646  | -4.044827 |
| H 0 | -0.896606 | 3.027463  | -3.537433 |
| H 0 | 0.896606  | 3.027463  | -3.537432 |

SCF Done: E(RB3LYP) = -  
2302.59242715

Sum of electronic and zero-point  
Energies= -2302.277734

Sum of electronic and thermal Energies=  
-2302.252877

Sum of electronic and thermal  
Enthalpies= -2302.251933

Sum of electronic and thermal Free  
Energies= -2302.334266

### 6.1.10.2 Minimum geometry of native BBT under IEFPCM variation of PCM

(B3LYP/6-311++G\*\*, IEFPCM CH<sub>2</sub>Cl<sub>2</sub>)

Conformer I:

#p opt freq=noraman b3lyp/6-311++g(d,p)  
pop=full scrf=(iefpcm,solvent=  
dichloromethane)

0 1

|     |          |           |           |
|-----|----------|-----------|-----------|
| C 0 | 5.424220 | -2.327969 | -0.331797 |
| C 0 | 4.566846 | -3.344537 | 0.116676  |
| C 0 | 3.209001 | -3.108855 | 0.287573  |



|     |           |           |           |                                         |           |           |           |
|-----|-----------|-----------|-----------|-----------------------------------------|-----------|-----------|-----------|
| C 0 | 2.687587  | -1.835877 | 0.002796  | H 0                                     | 0.000225  | 4.179202  | 2.713526  |
| C 0 | 3.566424  | -0.826349 | -0.454784 | H 0                                     | -0.000199 | 0.872860  | 4.209910  |
| C 0 | 4.930848  | -1.058719 | -0.619678 | H 0                                     | 0.896378  | 2.390962  | 3.949232  |
| C 0 | 1.337584  | -1.351852 | 0.132257  | H 0                                     | -0.896320 | 2.391147  | 3.948771  |
| C 0 | 1.196050  | -0.048614 | -0.229319 | SCF Done: E(RB3LYP) = -                 |           |           |           |
| S 0 | 2.712937  | 0.681135  | -0.768674 | 2302.60722690                           |           |           |           |
| S 0 | 0.000053  | -2.358676 | 0.751907  | Sum of electronic and zero-point        |           |           |           |
| C 0 | -1.337536 | -1.351891 | 0.132300  | Energies= -2302.292446                  |           |           |           |
| C 0 | -1.196070 | -0.048646 | -0.229309 | Sum of electronic and thermal Energies= |           |           |           |
| N 0 | -0.000007 | 0.681547  | -0.301834 | -2302.267651                            |           |           |           |
| C 0 | -2.687508 | -1.835970 | 0.002877  | Sum of electronic and thermal           |           |           |           |
| C 0 | -3.566399 | -0.826497 | -0.454707 | Enthalpies= -2302.266707                |           |           |           |
| S 0 | -2.712941 | 0.681028  | -0.768628 | Sum of electronic and thermal Free      |           |           |           |
| C 0 | -3.208872 | -3.108965 | 0.287689  | Energies= -2302.348644                  |           |           |           |
| C 0 | -4.566712 | -3.344691 | 0.116845  | Conformer II:                           |           |           |           |
| C 0 | -5.424138 | -2.328159 | -0.331616 | #p opt freq=noraman b3lyp/6-311++g(d,p) |           |           |           |
| C 0 | -4.930813 | -1.058898 | -0.619545 | pop=full scrf=(iefpcm,solvent=          |           |           |           |
| C 0 | -0.000026 | 2.076696  | 0.029116  | dichloromethane)                        |           |           |           |
| C 0 | -0.000212 | 3.046334  | -0.985547 | 0 1                                     |           |           |           |
| C 0 | -0.000282 | 4.413338  | -0.672386 | C 0                                     | 5.417792  | -2.281024 | -0.455161 |
| C 0 | -0.000131 | 4.795781  | 0.661997  | C 0                                     | 4.563089  | -3.373261 | -0.240939 |
| C 0 | 0.000085  | 3.848831  | 1.683979  | C 0                                     | 3.207737  | -3.184648 | -0.003268 |
| C 0 | 0.000126  | 2.482890  | 1.378577  | C 0                                     | 2.684364  | -1.880594 | 0.017826  |
| O 0 | 0.000362  | 1.489796  | 2.289948  | C 0                                     | 3.562098  | -0.793613 | -0.204222 |
| C 0 | -0.000298 | 2.643686  | -2.359898 | C 0                                     | 4.922892  | -0.979787 | -0.437598 |
| N 0 | -0.000346 | 2.362198  | -3.480561 | C 0                                     | 1.335762  | -1.439935 | 0.256332  |
| C 0 | 0.000037  | 1.824646  | 3.684581  | C 0                                     | 1.195774  | -0.087064 | 0.195734  |
| H 0 | 6.481117  | -2.530850 | -0.458805 | S 0                                     | 2.709611  | 0.747304  | -0.153848 |
| H 0 | 4.970346  | -4.326984 | 0.332934  | S 0                                     | -0.000132 | -2.550346 | 0.676303  |
| H 0 | 2.554460  | -3.900806 | 0.633591  | C 0                                     | -1.335901 | -1.439825 | 0.256196  |
| H 0 | 5.591561  | -0.274157 | -0.969046 | C 0                                     | -1.195784 | -0.086967 | 0.195614  |
| H 0 | -2.554292 | -3.900890 | 0.633693  | N 0                                     | -0.000012 | 0.628532  | 0.353856  |
| H 0 | -4.970171 | -4.327150 | 0.333123  | C 0                                     | -2.684566 | -1.880364 | 0.017777  |
| H 0 | -6.481034 | -2.531075 | -0.458570 | C 0                                     | -3.562220 | -0.793291 | -0.204189 |
| H 0 | -5.591562 | -0.274366 | -0.968913 | S 0                                     | -2.709637 | 0.747533  | -0.153796 |
| H 0 | -0.000425 | 5.148924  | -1.465226 | C 0                                     | -3.208053 | -3.184374 | -0.003287 |
| H 0 | -0.000171 | 5.848511  | 0.917196  | C 0                                     | -4.563432 | -3.372875 | -0.240892 |
|     |           |           |           | C 0                                     | -5.418046 | -2.280563 | -0.455078 |
|     |           |           |           | C 0                                     | -4.923031 | -0.979367 | -0.437526 |

|     |           |           |           |                                         |           |              |           |
|-----|-----------|-----------|-----------|-----------------------------------------|-----------|--------------|-----------|
| C O | 0.000082  | 2.056685  | 0.290344  | H O                                     | -6.473129 | -2.448021    | -0.636755 |
| C O | 0.000226  | 2.810758  | 1.475323  | H O                                     | -5.580632 | -0.134390    | -0.604587 |
| C O | 0.000328  | 4.210081  | 1.436486  | H O                                     | 0.000418  | 4.777196     | 2.357459  |
| C O | 0.000325  | 4.846508  | 0.200995  | H O                                     | 0.000419  | 5.928811     | 0.156580  |
| C O | 0.000202  | 4.118586  | -0.985113 | H O                                     | 0.000228  | 4.643104     | -1.930466 |
| C O | 0.000070  | 2.717696  | -0.954927 | H O                                     | 0.000130  | 1.698815     | -4.048523 |
| O O | 0.000006  | 1.925969  | -2.044810 | H O                                     | -0.896107 | 3.136132     | -3.494628 |
| C O | 0.000211  | 2.139329  | 2.739652  | H O                                     | 0.896630  | 3.135922     | -3.494483 |
| N O | 0.000202  | 1.629776  | 3.776521  | SCF Done: E(RB3LYP) = -                 |           |              |           |
| C O | 0.000178  | 2.528912  | -3.346510 | 2302.60706417                           |           |              |           |
| H O | 6.472852  | -2.448581 | -0.636895 | Sum of electronic and zero-point        |           |              |           |
| H O | 4.967028  | -4.378940 | -0.259492 | Energies=                               |           | -2302.292304 |           |
| H O | 2.556049  | -4.035326 | 0.160928  | Sum of electronic and thermal Energies= |           | -2302.267496 |           |
| H O | 5.580552  | -0.134860 | -0.604683 | Sum of electronic and thermal           |           |              |           |
| H O | -2.556424 | -4.035107 | 0.160863  | Enthalpies=                             |           | -2302.266551 |           |
| H O | -4.967462 | -4.378526 | -0.259421 | Sum of electronic and thermal Free      |           |              |           |
|     |           |           |           | Energies=                               |           | -2302.348338 |           |

### 6.1.10.3 Minimum geometry of native BBTT under SMD variation of PCM (B3LYP/6-311++G\*\*,

#### SMD CH<sub>2</sub>Cl<sub>2</sub>)

|                                         |           |           |           |     |           |           |           |
|-----------------------------------------|-----------|-----------|-----------|-----|-----------|-----------|-----------|
| Conformer I:                            |           |           |           | C O | -3.570219 | -0.825617 | -0.450097 |
| #p opt freq=noraman b3lyp/6-311++g(d,p) |           |           |           | S O | -2.715735 | 0.682588  | -0.763410 |
| pop=full scrf=(SMD,solvent=dic          |           |           |           | C O | -3.210830 | -3.110780 | 0.281653  |
| hlromethane)                            |           |           |           | C O | -4.570023 | -3.343810 | 0.116760  |
| 0 1                                     |           |           |           | C O | -5.428785 | -2.324728 | -0.323380 |
| C O                                     | 5.428944  | -2.324899 | -0.321801 | C O | -4.935920 | -1.054677 | -0.609137 |
| C O                                     | 4.570019  | -3.343959 | 0.118079  | C O | 0.000090  | 2.077600  | 0.027144  |
| C O                                     | 3.210791  | -3.110878 | 0.282610  | C O | 0.000962  | 3.051156  | -0.984825 |
| C O                                     | 2.689569  | -1.836965 | 0.000334  | C O | 0.001095  | 4.417019  | -0.667155 |
| C O                                     | 3.570472  | -0.825715 | -0.448977 | C O | 0.000338  | 4.794293  | 0.669186  |
| C O                                     | 4.936209  | -1.054820 | -0.607646 | C O | -0.000599 | 3.844612  | 1.688412  |
| C O                                     | 1.338305  | -1.353756 | 0.124396  | C O | -0.000724 | 2.479528  | 1.377741  |
| C O                                     | 1.195696  | -0.049414 | -0.232839 | O O | -0.001549 | 1.484669  | 2.285122  |
| S O                                     | 2.716152  | 0.682526  | -0.762487 | C O | 0.001632  | 2.653661  | -2.360041 |
| S O                                     | -0.000081 | -2.366776 | 0.733135  | N O | 0.002186  | 2.375166  | -3.481360 |
| C O                                     | -1.338245 | -1.353730 | 0.123950  | C O | -0.003539 | 1.817378  | 3.681625  |
| C O                                     | -1.195486 | -0.049395 | -0.233243 | H O | 6.487024  | -2.526525 | -0.443586 |
| N O                                     | 0.000119  | 0.681604  | -0.307070 | H O | 4.973286  | -4.327120 | 0.333111  |
| C O                                     | -2.689484 | -1.836893 | -0.000514 |     |           |           |           |

H O 2.557280 -3.906737 0.622520  
 H O 5.598940 -0.268601 -0.950835  
 H O -2.557446 -3.906656 0.621764  
 H O -4.973385 -4.326949 0.331713  
 H O -6.486842 -2.526313 -0.445436  
 H O -5.598528 -0.268442 -0.952526  
 H O 0.001763 5.154798 -1.458717  
 H O 0.000449 5.846778 0.927400  
 H O -0.001167 4.168283 2.720723  
 H O -0.004564 0.863538 4.205608  
 H O 0.893198 2.382012 3.949859  
 H O -0.900739 2.382528 3.947209  
 SCF Done: E(RB3LYP) = -  
 2302.62968937  
 Sum of electronic and zero-point  
 Energies= -2302.314978  
 Sum of electronic and thermal Energies=  
 -2302.290175  
 Sum of electronic and thermal  
 Enthalpies= -2302.289231  
 Sum of electronic and thermal Free  
 Energies= -2302.371287  
 Conformer II:  
 #p opt freq=noraman b3lyp/6-311++g(d,p)  
 pop=full scrf=(SMD,solvent=dic  
 hloromethane)  
 0 1  
 C O 5.401510 -2.307632 -0.507160  
 C O 4.551124 -3.390414 -0.234629  
 C O 3.200983 -3.192590 0.025015  
 C O 2.677983 -1.887939 0.009468  
 C O 3.552019 -0.811276 -0.271023  
 C O 4.907827 -1.006025 -0.526015  
 C O 1.336326 -1.433603 0.265040  
 C O 1.195213 -0.083237 0.160527  
 S O 2.702689 0.732551 -0.261641  
 S O 0.000052 -2.514726 0.757248  
 C O -1.336220 -1.433667 0.264953  
 C O -1.195234 -0.083285 0.160564

N O 0.000015 0.632393 0.313677  
 C O -2.677847 -1.888072 0.009386  
 C O -3.551980 -0.811470 -0.270948  
 S O -2.702706 0.732465 -0.261494  
 C O -3.200740 -3.192764 0.024784  
 C O -4.550875 -3.390657 -0.234822  
 C O -5.401370 -2.307911 -0.507159  
 C O -4.907784 -1.006263 -0.525894  
 C O -0.000042 2.062732 0.321725  
 C O -0.000136 2.760714 1.542319  
 C O -0.000191 4.159925 1.570859  
 C O -0.000124 4.854358 0.366531  
 C O -0.000028 4.184235 -0.852692  
 C O -0.000017 2.782707 -0.890431  
 O O -0.000020 2.045554 -2.017412  
 C O -0.000114 2.032366 2.773997  
 N O -0.000065 1.473835 3.785163  
 C O -0.000217 2.710918 -3.290397  
 H O 6.452515 -2.483049 -0.705979  
 H O 4.954331 -4.396800 -0.225056  
 H O 2.555601 -4.038319 0.235262  
 H O 5.561935 -0.167976 -0.738365  
 H O -2.555274 -4.038463 0.234893  
 H O -4.954006 -4.397068 -0.225346  
 H O -6.452371 -2.483390 -0.705931  
 H O -5.561965 -0.168235 -0.738088  
 H O -0.000286 4.681343 2.518938  
 H O -0.000134 5.938070 0.373729  
 H O 0.000014 4.753168 -1.772425  
 H O -0.000282 1.914129 -4.031724  
 H O -0.897375 3.323483 -3.411007  
 H O 0.896865 3.323542 -3.411263  
 SCF Done: E(RB3LYP) = -  
 2302.62973321  
 Sum of electronic and zero-point  
 Energies= -2302.315040  
 Sum of electronic and thermal Energies=  
 -2302.290233

Sum of electronic and thermal  
Enthalpies= -2302.289289

Sum of electronic and thermal Free  
Energies= -2302.371597

#### 6.1.10.4 Minimum geometry of radical cation of BBTT in gas phase (B3LYP/6-311++G\*\*)

#p opt freq=noraman ub3lyp/6-  
311++g(d,p) pop=full

0 1  
C 0 -5.479527 -2.222029 0.078782  
C 0 -4.625776 -3.333537 0.151997  
C 0 -3.250021 -3.173621 0.143235  
C 0 -2.711937 -1.877710 0.060369  
C 0 -3.588405 -0.772233 -0.011880  
C 0 -4.970358 -0.929981 -0.004100  
C 0 -1.337562 -1.459378 0.033967  
C 0 -1.195097 -0.082600 -0.055969  
S 0 -2.722312 0.764154 -0.112071  
S 0 -0.000078 -2.576426 0.099412  
C 0 1.337487 -1.459452 0.033947  
C 0 1.195095 -0.082686 -0.056094  
N 0 -0.000033 0.598875 -0.109321  
C 0 2.711816 -1.877864 0.060148  
C 0 3.588348 -0.772446 -0.012355  
S 0 2.722270 0.763981 -0.112590  
C 0 3.249862 -3.173797 0.143065  
C 0 4.625605 -3.333767 0.151749  
C 0 5.479408 -2.222300 0.078423  
C 0 4.970292 -0.930240 -0.004568  
C 0 0.000004 2.040561 -0.191346  
C 0 -0.000277 2.670583 -1.447158  
C 0 -0.000244 4.066303 -1.520902  
C 0 0.000104 4.805812 -0.342213  
C 0 0.000383 4.187883 0.904579

C 0 0.000315 2.789780 0.998033  
O 0 0.000610 2.082486 2.142219  
C 0 -0.000565 1.872511 -2.634215  
N 0 -0.000760 1.209182 -3.579264  
C 0 0.000982 2.780043 3.398759  
H 0 -6.552630 -2.369695 0.085006  
H 0 -5.049108 -4.328353 0.214389  
H 0 -2.600073 -4.039486 0.198170  
H 0 -5.634192 -0.076217 -0.062892  
H 0 2.599877 -4.039626 0.198146  
H 0 5.048902 -4.328603 0.214074  
H 0 6.552504 -2.370009 0.084772  
H 0 5.634155 -0.076511 -0.063523  
H 0 -0.000466 4.552374 -2.487169  
H 0 0.000147 5.887933 -0.393327  
H 0 0.000658 4.793153 1.800547  
H 0 0.001222 2.002964 4.158800  
H 0 0.898482 3.394738 3.500647  
H 0 -0.896484 3.394705 3.501171

SCF Done: E(UB3LYP) = -  
2302.37433191

Sum of electronic and zero-point  
Energies= -2302.058966

Sum of electronic and thermal Energies=  
-2302.034209

Sum of electronic and thermal  
Enthalpies= -2302.033264

Sum of electronic and thermal Free  
Energies= -2302.115156

#### 6.1.10.5 Minimum geometry of radical cation of BBTT under SMD variation of PCM

(B3LYP/6-311++G\*\*, SMD CH<sub>2</sub>Cl<sub>2</sub>)

#p opt freq=noraman ub3lyp/6-  
311++g(d,p) pop=full  
scrf=(SMD,solvent=dichloromethane)

0 1  
C 0 5.477279 -2.227100 -0.102631

C 0 4.621632 -3.339284 -0.142064  
C 0 3.245364 -3.179128 -0.115112  
C 0 2.710690 -1.880851 -0.047202  
C 0 3.588713 -0.775132 -0.005626

|     |           |           |           |                                         |           |           |           |
|-----|-----------|-----------|-----------|-----------------------------------------|-----------|-----------|-----------|
| C 0 | 4.970839  | -0.932522 | -0.033940 | C 0                                     | -0.001744 | 2.735436  | -3.404489 |
| C 0 | 1.336732  | -1.461586 | -0.008596 | H 0                                     | 6.550380  | -2.375643 | -0.124352 |
| C 0 | 1.193865  | -0.085008 | 0.066769  | H 0                                     | 5.042992  | -4.335983 | -0.193143 |
| S 0 | 2.723432  | 0.763720  | 0.083773  | H 0                                     | 2.595045  | -4.046154 | -0.143962 |
| S 0 | 0.000064  | -2.580122 | -0.047643 | H 0                                     | 5.636577  | -0.078336 | -0.002631 |
| C 0 | -1.336647 | -1.461654 | -0.008449 | H 0                                     | -2.594745 | -4.046280 | -0.143729 |
| C 0 | -1.193837 | -0.085014 | 0.066872  | H 0                                     | -5.042702 | -4.336308 | -0.192318 |
| N 0 | -0.000043 | 0.596842  | 0.127914  | H 0                                     | -6.550211 | -2.376068 | -0.123398 |
| C 0 | -2.710549 | -1.881001 | -0.046725 | H 0                                     | -5.636574 | -0.078714 | -0.001613 |
| C 0 | -3.588656 | -0.775350 | -0.004864 | H 0                                     | 0.001224  | 4.587874  | 2.456954  |
| S 0 | -2.723432 | 0.763545  | 0.084470  | H 0                                     | 0.000045  | 5.891297  | 0.342466  |
| C 0 | -3.245143 | -3.179321 | -0.114605 | H 0                                     | -0.001181 | 4.762937  | -1.834485 |
| C 0 | -4.621399 | -3.339580 | -0.141336 | H 0                                     | -0.001720 | 1.946252  | -4.153379 |
| C 0 | -5.477119 | -2.227458 | -0.101718 | H 0                                     | -0.900012 | 3.347274  | -3.512754 |
| C 0 | -4.970767 | -0.932840 | -0.033056 | H 0                                     | 0.896050  | 3.347857  | -3.513282 |
| C 0 | -0.000016 | 2.039371  | 0.197200  | SCF Done: E(UB3LYP) = -                 |           |           |           |
| C 0 | 0.000630  | 2.690957  | 1.444118  | 2302.45567727                           |           |           |           |
| C 0 | 0.000698  | 4.086915  | 1.498351  | Sum of electronic and zero-point        |           |           |           |
| C 0 | 0.000032  | 4.808393  | 0.307410  | Energies= -2302.140141                  |           |           |           |
| C 0 | -0.000663 | 4.172583  | -0.928421 | Sum of electronic and thermal Energies= |           |           |           |
| C 0 | -0.000658 | 2.772103  | -1.002235 | -2302.115521                            |           |           |           |
| O 0 | -0.001203 | 2.051402  | -2.135196 | Sum of electronic and thermal           |           |           |           |
| C 0 | 0.001143  | 1.927928  | 2.653640  | Enthalpies= -2302.114577                |           |           |           |
| N 0 | 0.001600  | 1.317353  | 3.633778  | Sum of electronic and thermal Free      |           |           |           |
|     |           |           |           | Energies= -2302.196022                  |           |           |           |

### 6.1.11 *anti-anti-N-ortho,ortho'*-dichlorophenyl-BBTT 3g

#### 6.1.11.1 Minimum geometry of native BBTT in gas phase (B3LYP/6-311++G\*\*)

|                                           |           |           |           |          |          |           |           |
|-------------------------------------------|-----------|-----------|-----------|----------|----------|-----------|-----------|
| #p opt freq rb3lyp/6-311++g(d,p) pop=full | S 0       | 0.000020  | -2.348095 | 0.834012 |          |           |           |
| 0 1                                       | C 0       | 1.335113  | -1.364059 | 0.178096 |          |           |           |
| C 0                                       | -5.385613 | -2.383293 | -0.456983 | C 0      | 1.196665 | -0.054022 | -0.159541 |
| C 0                                       | -4.532741 | -3.396180 | 0.006519  | N 0      | 0.000001 | 0.679596  | -0.159585 |
| C 0                                       | -3.186385 | -3.146385 | 0.230924  | C 0      | 2.671330 | -1.863313 | -0.013263 |
| C 0                                       | -2.671271 | -1.863379 | -0.013285 | C 0      | 3.544105 | -0.857340 | -0.488627 |
| C 0                                       | -3.544058 | -0.857418 | -0.488651 | S 0      | 2.697585 | 0.660492  | -0.761181 |
| C 0                                       | -4.897984 | -1.105123 | -0.707329 | C 0      | 3.186469 | -3.146302 | 0.230986  |
| C 0                                       | -1.335069 | -1.364097 | 0.178108  | C 0      | 4.532838 | -3.396067 | 0.006622  |
| C 0                                       | -1.196641 | -0.054059 | -0.159527 | C 0      | 5.385697 | -2.383168 | -0.456873 |
| S 0                                       | -2.697581 | 0.660457  | -0.761106 | C 0      | 4.898043 | -1.105015 | -0.707261 |

|      |           |           |           |                                         |           |           |           |
|------|-----------|-----------|-----------|-----------------------------------------|-----------|-----------|-----------|
| C 0  | -0.000026 | 2.056792  | 0.221613  | H 0                                     | 6.434788  | -2.596774 | -0.625147 |
| C 0  | -0.000011 | 3.075182  | -0.744427 | H 0                                     | 5.555365  | -0.322970 | -1.069175 |
| C 0  | -0.000041 | 4.419433  | -0.383823 | H 0                                     | -0.000021 | 5.178897  | -1.154197 |
| C 0  | -0.000099 | 4.763482  | 0.963180  | H 0                                     | -0.000125 | 5.808613  | 1.249410  |
| C 0  | -0.000125 | 3.780491  | 1.947722  | H 0                                     | -0.000175 | 4.041824  | 2.997665  |
| C 0  | -0.000088 | 2.441625  | 1.572900  | SCF Done: E(RB3LYP) = -                 |           |           |           |
| Cl 0 | -0.000089 | 1.216495  | 2.816796  | 3015.01346748                           |           |           |           |
| Cl 0 | 0.000026  | 2.662505  | -2.444671 | Sum of electronic and zero-point        |           |           |           |
| H 0  | -6.434694 | -2.596923 | -0.625288 | Energies= -3014.748899                  |           |           |           |
| H 0  | -4.931481 | -4.386870 | 0.192013  | Sum of electronic and thermal Energies= |           |           |           |
| H 0  | -2.532066 | -3.934293 | 0.586339  | -3014.726115                            |           |           |           |
| H 0  | -5.555318 | -0.323084 | -1.069237 | Sum of electronic and thermal           |           |           |           |
| H 0  | 2.532159  | -3.934219 | 0.586398  | Enthalpies= -3014.725171                |           |           |           |
| H 0  | 4.931596  | -4.386744 | 0.192145  | Sum of electronic and thermal Free      |           |           |           |
|      |           |           |           | Energies= -3014.803008                  |           |           |           |

#### 6.1.11.2 Minimum geometry of native BBTT under IEFPCM variation of PCM

(B3LYP/6-311++G\*\*, IEFPCM CH<sub>2</sub>Cl<sub>2</sub>)

```
#p opt freq=noraman rb3lyp/6-311++g(d,p)
scr=(iefpcm,solvent=dichloro
methane) pop=full geom=check
guess=read
0 1
```

|     |           |           |           |      |           |           |           |
|-----|-----------|-----------|-----------|------|-----------|-----------|-----------|
| C 0 | -5.410093 | -2.358021 | -0.418128 | C 0  | 3.200106  | -3.165452 | 0.185835  |
| C 0 | -4.553774 | -3.396366 | -0.020067 | C 0  | 4.553818  | -3.396313 | -0.020092 |
| C 0 | -3.200064 | -3.165489 | 0.185853  | C 0  | 5.410123  | -2.357958 | -0.418157 |
| C 0 | -2.681286 | -1.875054 | -0.012674 | C 0  | 4.919425  | -1.071295 | -0.620380 |
| C 0 | -3.558914 | -0.843352 | -0.420470 | C 0  | -0.000011 | 2.055471  | 0.191672  |
| C 0 | -4.919410 | -1.071351 | -0.620354 | C 0  | -0.000037 | 3.018825  | -0.829271 |
| C 0 | -1.337114 | -1.393073 | 0.167816  | C 0  | -0.000048 | 4.380564  | -0.543991 |
| C 0 | -1.197626 | -0.069104 | -0.113225 | C 0  | -0.000033 | 4.797649  | 0.782781  |
| S 0 | -2.709116 | 0.683959  | -0.633840 | C 0  | -0.000008 | 3.870863  | 1.821392  |
| S 0 | 0.000019  | -2.418107 | 0.760057  | C 0  | 0.000001  | 2.514689  | 1.519132  |
| C 0 | 1.337136  | -1.393057 | 0.167807  | Cl 0 | 0.000032  | 1.353542  | 2.828495  |
| C 0 | 1.197631  | -0.069089 | -0.113234 | Cl 0 | -0.000068 | 2.508624  | -2.505766 |
| N 0 | -0.000002 | 0.659034  | -0.107468 | H 0  | -6.464037 | -2.557277 | -0.572421 |
| C 0 | 2.681312  | -1.875023 | -0.012690 | H 0  | -4.955146 | -4.391957 | 0.129858  |
| C 0 | 3.558927  | -0.843311 | -0.420490 | H 0  | -2.546270 | -3.973737 | 0.493527  |
| S 0 | 2.709111  | 0.683990  | -0.633855 | H 0  | -5.579260 | -0.269627 | -0.930236 |
|     |           |           |           | H 0  | 2.546323  | -3.973708 | 0.493511  |
|     |           |           |           | H 0  | 4.955202  | -4.391899 | 0.129830  |
|     |           |           |           | H 0  | 6.464069  | -2.557202 | -0.572455 |
|     |           |           |           | H 0  | 5.579265  | -0.269562 | -0.930265 |
|     |           |           |           | H 0  | -0.000070 | 5.099290  | -1.352413 |

|                                  |               |          |          |                                         |              |
|----------------------------------|---------------|----------|----------|-----------------------------------------|--------------|
| H O                              | -0.000042     | 5.856586 | 1.010648 | Sum of electronic and thermal Energies= | -3014.734149 |
| H O                              | 0.000003      | 4.193043 | 2.854136 | Sum of electronic and thermal           |              |
| SCF Done:                        | E(RB3LYP) = - |          |          | Enthalpies=                             | -3014.733205 |
|                                  | 3015.02144862 |          |          | Sum of electronic and thermal Free      |              |
| Sum of electronic and zero-point |               |          |          | Energies=                               | -3014.811524 |
|                                  | -3014.756988  |          |          |                                         |              |

### 6.1.11.3 Minimum geometry of native BBTT under IEFPCM variation of PCM

(PBE1PBE/6-311++G\*\*, IEFPCM CH<sub>2</sub>Cl<sub>2</sub>)

|                                          |                                         |                 |           |           |
|------------------------------------------|-----------------------------------------|-----------------|-----------|-----------|
| #p opt freq=noraman PBE1PBE/6-           | C O                                     | 0.000420        | 4.348433  | -0.566351 |
| 311++g(d,p) scrf=(iefpcm,solvent=dichlor | C O                                     | 0.000527        | 4.766038  | 0.756810  |
| omethane) pop=full geom=check            | C O                                     | 0.000456        | 3.845586  | 1.796700  |
| guess=read                               | C O                                     | 0.000283        | 2.491444  | 1.499282  |
| 0 1                                      | Cl O                                    | 0.000198        | 1.335186  | 2.785953  |
| C O                                      | Cl O                                    | 0.000115        | 2.466094  | -2.499403 |
| C O                                      | H O                                     | -6.467522       | -2.491918 | -0.514691 |
| C O                                      | H O                                     | -4.966556       | -4.356798 | 0.109508  |
| C O                                      | H O                                     | -2.546485       | -3.973848 | 0.430490  |
| C O                                      | H O                                     | -5.567258       | -0.206956 | -0.835086 |
| C O                                      | H O                                     | 2.545941        | -3.974201 | 0.430435  |
| C O                                      | H O                                     | 4.965963        | -4.357419 | 0.109404  |
| C O                                      | H O                                     | 6.467130        | -2.492710 | -0.514810 |
| S O                                      | H O                                     | 5.567120        | -0.207641 | -0.835171 |
| S O                                      | H O                                     | 0.000483        | 5.065592  | -1.377838 |
| C O                                      | H O                                     | 0.000672        | 5.826677  | 0.982205  |
| C O                                      | H O                                     | 0.000538        | 4.170507  | 2.829893  |
| C O                                      | SCF Done:                               | E(RPBE1PBE) = - |           |           |
| C O                                      |                                         | 3013.19146340   |           |           |
| C O                                      | Sum of electronic and zero-point        | Energies=       |           |           |
| S O                                      |                                         | -3012.924096    |           |           |
| C O                                      | Sum of electronic and thermal Energies= | -3012.901395    |           |           |
| C O                                      | Sum of electronic and thermal           |                 |           |           |
| C O                                      | Enthalpies=                             | -3012.900451    |           |           |
| C O                                      | Sum of electronic and thermal Free      |                 |           |           |
| C O                                      | Energies=                               | -3012.979222    |           |           |
| C O                                      |                                         |                 |           |           |

### 6.1.11.4 TD-DFT calculation of ground state of native BBTT under IEFPCM variation of PCM

(PBE1PBE/6-311++G\*\*, IEFPCM CH<sub>2</sub>Cl<sub>2</sub>)

#p td=(singlets,nstates=24) PBE1PBE/6-311++g(d,p) scrf=(iefpcm,solvent=dichloromethane) geom=check guess=read

<TDDFT> Excited State 1: Singlet-A  
2.9032 eV 427.06 nm f=0.0764

<TDDFT>HOMO -> LUMO  
96.0%

<TDDFT> Excited State 2: Singlet-A  
3.2100 eV 386.25 nm f=0.0235

<TDDFT>HOMO -> LUMO+1  
91.2%

<TDDFT>HOMO -> LUMO+2 6.6%

<TDDFT> Excited State 3: Singlet-A  
3.4495 eV 359.42 nm f=0.0178

<TDDFT>HOMO -> LUMO+1 7.4%

<TDDFT>HOMO -> LUMO+2  
89.0%

<TDDFT> Excited State 4: Singlet-A  
3.8197 eV 324.59 nm f=0.0918

<TDDFT>HOMO -> LUMO+3  
80.7%

<TDDFT>HOMO -> LUMO+4 5.1%

<TDDFT>HOMO -> LUMO+6 9.1%

<TDDFT> Excited State 5: Singlet-A  
3.8681 eV 320.53 nm f=0.0108

<TDDFT>HOMO -> LUMO+5  
70.7%

<TDDFT>HOMO -> LUMO+7  
20.4%

<TDDFT>HOMO -> LUMO+11 2.9%

<TDDFT> Excited State 6: Singlet-A  
3.9392 eV 314.75 nm f=0.0054

<TDDFT>HOMO -> LUMO+3 6.0%

<TDDFT>HOMO -> LUMO+4  
90.6%

<TDDFT> Excited State 7: Singlet-A  
4.0837 eV 303.61 nm f=0.0008

<TDDFT>HOMO -> LUMO+5  
24.4%

<TDDFT>HOMO -> LUMO+7  
66.5%

<TDDFT>HOMO -> LUMO+11 4.6%

<TDDFT> Excited State 8: Singlet-A  
4.1079 eV 301.82 nm f=0.0431

<TDDFT>HOMO -> LUMO+3 9.2%

<TDDFT>HOMO -> LUMO+6  
79.9%

<TDDFT>HOMO -> LUMO+9 2.8%

<TDDFT> Excited State 9: Singlet-A  
4.3954 eV 282.08 nm f=0.0093

<TDDFT>HOMO-1 -> LUMO 5.3%

<TDDFT>HOMO -> LUMO+6 3.8%

<TDDFT>HOMO -> LUMO+8  
84.4%

<TDDFT>HOMO -> LUMO+13 2.4%

<TDDFT> Excited State 10: Singlet-A  
4.4845 eV 276.47 nm f=0.0674

<TDDFT>HOMO-1 -> LUMO  
87.8%

<TDDFT>HOMO -> LUMO+8 6.4%

<TDDFT> Excited State 11: Singlet-A  
4.4979 eV 275.65 nm f=0.1554

<TDDFT>HOMO-2 -> LUMO  
88.6%

<TDDFT>HOMO -> LUMO+12 3.2%

<TDDFT> Excited State 12: Singlet-A  
4.6066 eV 269.15 nm f=0.0027

<TDDFT>HOMO -> LUMO+6 3.9%

<TDDFT>HOMO -> LUMO+9  
68.6%

<TDDFT>HOMO -> LUMO+10  
17.3%

<TDDFT>HOMO -> LUMO+16 5.1%

<TDDFT> Excited State 13: Singlet-A  
4.6861 eV 264.58 nm f=0.0278

<TDDFT>HOMO-1 -> LUMO+1  
88.2%

<TDDFT>HOMO-1 -> LUMO+2 2.1%

<TDDFT> Excited State 14: Singlet-A  
4.7250 eV 262.40 nm f=0.0038

<TDDFT>HOMO-2 -> LUMO 2.5%

<TDDFT>HOMO-2 -> LUMO+1  
76.8%

<TDDFT>HOMO-2 -> LUMO+2 4.2%



|                                                                     |       |                                                                     |       |
|---------------------------------------------------------------------|-------|---------------------------------------------------------------------|-------|
| <TDDFT>HOMO-1 -> LUMO+3                                             | 2.1%  | <TDDFT>HOMO-3 -> LUMO                                               | 60.4% |
| <TDDFT>HOMO -> LUMO+12                                              | 4.9%  | <TDDFT>HOMO-1 -> LUMO+2                                             | 28.5% |
| <TDDFT> Excited State 15: Singlet-A<br>4.8254 eV 256.94 nm f=0.0033 |       | <TDDFT>HOMO-1 -> LUMO+5                                             | 3.6%  |
| <TDDFT>HOMO-1 -> LUMO+1                                             | 2.2%  | <TDDFT> Excited State 20: Singlet-A<br>5.0001 eV 247.96 nm f=0.0176 |       |
| <TDDFT>HOMO-1 -> LUMO+2                                             | 4.4%  | <TDDFT>HOMO-6 -> LUMO+1                                             | 9.8%  |
| <TDDFT>HOMO -> LUMO+9                                               | 16.2% | <TDDFT>HOMO-6 -> LUMO+2                                             | 6.9%  |
| <TDDFT>HOMO -> LUMO+10                                              | 68.1% | <TDDFT>HOMO-4 -> LUMO                                               | 46.6% |
| <TDDFT>HOMO -> LUMO+19                                              | 2.0%  | <TDDFT>HOMO-4 -> LUMO+1                                             | 10.4% |
| <TDDFT> Excited State 16: Singlet-A<br>4.8536 eV 255.45 nm f=0.2702 |       | <TDDFT>HOMO-4 -> LUMO+2                                             | 4.9%  |
| <TDDFT>HOMO-2 -> LUMO                                               | 2.9%  | <TDDFT>HOMO-3 -> LUMO+1                                             | 15.9% |
| <TDDFT>HOMO-2 -> LUMO+1                                             | 10.6% | <TDDFT> Excited State 21: Singlet-A<br>5.0238 eV 246.80 nm f=0.0860 |       |
| <TDDFT>HOMO -> LUMO+7                                               | 2.8%  | <TDDFT>HOMO-2 -> LUMO+2                                             | 10.2% |
| <TDDFT>HOMO -> LUMO+11                                              | 37.2% | <TDDFT>HOMO -> LUMO+7                                               | 4.7%  |
| <TDDFT>HOMO -> LUMO+12                                              | 35.5% | <TDDFT>HOMO -> LUMO+11                                              | 28.9% |
| <TDDFT>HOMO -> LUMO+22                                              | 2.1%  | <TDDFT>HOMO -> LUMO+12                                              | 42.4% |
| <TDDFT> Excited State 17: Singlet-A<br>4.8740 eV 254.38 nm f=0.0006 |       | <TDDFT>HOMO -> LUMO+15                                              | 6.0%  |
| <TDDFT>HOMO-3 -> LUMO                                               | 17.8% | <TDDFT> Excited State 22: Singlet-A<br>5.1110 eV 242.58 nm f=0.0961 |       |
| <TDDFT>HOMO-2 -> LUMO+3                                             | 3.8%  | <TDDFT>HOMO-2 -> LUMO+1                                             | 3.5%  |
| <TDDFT>HOMO-1 -> LUMO+1                                             | 3.3%  | <TDDFT>HOMO-2 -> LUMO+2                                             | 2.7%  |
| <TDDFT>HOMO-1 -> LUMO+2                                             | 56.1% | <TDDFT>HOMO-2 -> LUMO+5                                             | 8.6%  |
| <TDDFT>HOMO-1 -> LUMO+5                                             | 2.6%  | <TDDFT>HOMO-1 -> LUMO+3                                             | 63.1% |
| <TDDFT>HOMO -> LUMO+9                                               | 2.6%  | <TDDFT>HOMO-1 -> LUMO+4                                             | 2.4%  |
| <TDDFT>HOMO -> LUMO+10                                              | 6.2%  | <TDDFT>HOMO-1 -> LUMO+6                                             | 3.4%  |
| <TDDFT> Excited State 18: Singlet-A<br>4.9659 eV 249.67 nm f=0.0095 |       | <TDDFT> Excited State 23: Singlet-A<br>5.1304 eV 241.67 nm f=0.0015 |       |
| <TDDFT>HOMO-2 -> LUMO+1                                             | 4.8%  | <TDDFT>HOMO-4 -> LUMO                                               | 4.1%  |
| <TDDFT>HOMO-2 -> LUMO+2                                             | 72.0% | <TDDFT>HOMO-3 -> LUMO                                               | 6.2%  |
| <TDDFT>HOMO -> LUMO+11                                              | 11.8% | <TDDFT>HOMO-3 -> LUMO+1                                             | 14.9% |
| <TDDFT> Excited State 19: Singlet-A<br>4.9787 eV 249.03 nm f=0.0923 |       | <TDDFT>HOMO-3 -> LUMO+2                                             | 3.3%  |

|                                  |      |                           |                    |
|----------------------------------|------|---------------------------|--------------------|
| <TDDFT>HOMO-2 -> LUMO+3<br>35.6% |      | <TDDFT>HOMO-1 -> LUMO+7   | 7.0%               |
| <TDDFT>HOMO-2 -> LUMO+4          | 2.4% | <TDDFT> Excited State 24: | Singlet-A          |
| <TDDFT>HOMO-2 -> LUMO+6          | 4.8% | 5.1975 eV                 | 238.55 nm f=0.0120 |
| <TDDFT>HOMO-2 -> LUMO+8          | 2.7% | <TDDFT>HOMO -> LUMO+8     | 2.6%               |
| <TDDFT>HOMO-1 -> LUMO+2          | 2.6% | <TDDFT>HOMO -> LUMO+13    | 74.9%              |
| <TDDFT>HOMO-1 -> LUMO+5          | 2.4% | <TDDFT>HOMO -> LUMO+17    | 14.2%              |

#### 6.1.11.5 Minimum geometry of excited state of native BBTT under IEFPCM variation of PCM

(PBE1PBE/6-311++G\*\*, IEFPCM CH<sub>2</sub>Cl<sub>2</sub>)

```

#p opt td=(nstates=4) PBE1PBE/6-
311++g(d,p) freq scrf=(iefpcm,solvent=
dichloromethane) geom=check
guess=read
0 1
C 0 -5.472940 -2.243579 -0.070314
C 0 -4.615598 -3.346018 -0.028540
C 0 -3.239186 -3.185651 -0.005803
C 0 -2.688793 -1.890301 -0.023806
C 0 -3.576940 -0.787093 -0.067830
C 0 -4.950989 -0.948582 -0.091704
C 0 -1.328933 -1.473624 -0.010219
C 0 -1.189350 -0.066846 -0.057900
S 0 -2.730662 0.762437 -0.077420
S 0 0.000001 -2.550720 0.146869
C 0 1.328937 -1.473624 -0.010195
C 0 1.189354 -0.066845 -0.057879
N 0 0.000002 0.596624 -0.059882
C 0 2.688797 -1.890300 -0.023762
C 0 3.576945 -0.787092 -0.067776
S 0 2.730666 0.762438 -0.077383
C 0 3.239191 -3.185650 -0.005750
C 0 4.615603 -3.346017 -0.028466
C 0 5.472945 -2.243577 -0.070229
C 0 4.950993 -0.948580 -0.091631
C 0 0.000001 2.018490 0.026597
C 0 0.000043 2.799300 -1.133243
C 0 0.000048 4.184549 -1.050159
C 0 -0.000003 4.790757 0.198166
C 0 -0.000052 4.033895 1.364082
C 0 -0.000041 2.650578 1.273240
Cl 0 -0.000137 1.691880 2.710424
Cl 0 0.000119 2.030117 -2.680944
H 0 -6.547403 -2.388833 -0.085992
H 0 -5.033031 -4.347660 -0.014389
H 0 -2.589047 -4.054475 0.023932
H 0 -5.610820 -0.088107 -0.124707
H 0 2.589051 -4.054474 0.023977
H 0 5.033037 -4.347658 -0.014307
H 0 6.547408 -2.388830 -0.085892
H 0 5.610824 -0.088105 -0.124627
H 0 0.000089 4.775841 -1.957481
H 0 -0.000006 5.872854 0.265209
H 0 -0.000099 4.507516 2.337949
SCF Done: E(RPBE1PBE) = -
3013.18026874
Sum of electronic and zero-point
Energies= -3012.834168
Sum of electronic and thermal Energies=
-3012.810614
Sum of electronic and thermal
Enthalpies= -3012.809670
Sum of electronic and thermal Free
Energies= -3012.890008

```

### 6.1.11.6 TD-DFT calculation of excited state of native BBTT under IEFPCM variation of PCM

(PBE1PBE/6-311++G\*\*, IEFPCM CH<sub>2</sub>Cl<sub>2</sub>)

```
#p opt td=(nstates=4) PBE1PBE/6-311++g(d,p) freq scrf=(iefpcm,solvent=
dichloromethane) geom=check
guess=read
<TDDFT> Excited State 1: Singlet-A
2.2495 eV 551.17 nm f=0.1036
<TDDFT>HOMO -> LUMO
97.8%
<TDDFT> Excited State 2: Singlet-A
2.5796 eV 480.63 nm f=0.0029
<TDDFT>HOMO -> LUMO+1
98.9%
<TDDFT> Excited State 3: Singlet-A
2.8933 eV 428.52 nm f=0.0032
<TDDFT>HOMO -> LUMO+2
99.4%
<TDDFT> Excited State 4: Singlet-A
3.3194 eV 373.51 nm f=0.0023
<TDDFT>HOMO -> LUMO+3
37.6%
<TDDFT>HOMO -> LUMO+4
48.3%
<TDDFT>HOMO -> LUMO+6
10.0%
```

### 6.1.11.7 Minimum geometry of native BBTT under SMD variation of PCM (B3LYP/6-311++G\*\*, SMD CH<sub>2</sub>Cl<sub>2</sub>)

```
#p opt freq=noraman rb3lyp/6-311++g(d,p)
scrf=(smd,solvent=dichloromet
hane) pop=full geom=check guess=read
0 1
C 0 -5.406668 -2.365021 -0.428385
C 0 -4.551997 -3.400192 -0.018453
C 0 -3.199697 -3.167600 0.195507
C 0 -2.680590 -1.877643 -0.007092
C 0 -3.557303 -0.849704 -0.425791
C 0 -4.916412 -1.078677 -0.633944
C 0 -1.338041 -1.391684 0.179913
C 0 -1.197466 -0.068644 -0.104884
S 0 -2.707845 0.678767 -0.640389
S 0 -0.000086 -2.411952 0.780432
C 0 1.337952 -1.391747 0.179995
C 0 1.197457 -0.068699 -0.104800
N 0 0.000013 0.659902 -0.093558
C 0 2.680483 -1.877775 -0.006966
C 0 3.557261 -0.849878 -0.425634
S 0 2.707894 0.678644 -0.640233
C 0 3.199515 -3.167761 0.195634
C 0 4.551809 -3.400422 -0.018289
C 0 5.406545 -2.365293 -0.428190
C 0 4.916363 -1.078923 -0.633755
C 0 0.000043 2.059350 0.194016
C 0 0.000195 3.015123 -0.834408
C 0 0.000230 4.379098 -0.562365
C 0 0.000102 4.807069 0.760891
C 0 -0.000044 3.889947 1.808077
C 0 -0.000066 2.531748 1.517028
Cl 0 -0.000271 1.380937 2.839193
Cl 0 0.000432 2.490079 -2.508757
H 0 -6.459488 -2.566681 -0.589287
H 0 -4.953474 -4.395677 0.133905
H 0 -2.549667 -3.975544 0.512750
H 0 -5.575409 -0.279022 -0.952411
H 0 2.549434 -3.975675 0.512851
H 0 4.953229 -4.395929 0.134072
H 0 6.459359 -2.567007 -0.589064
H 0 5.575411 -0.279299 -0.952197
H 0 0.000366 5.092622 -1.376224
H 0 0.000129 5.868233 0.980079
H 0 -0.000140 4.223997 2.837437
SCF Done: E(RB3LYP) = -
3015.04575158
```

Sum of electronic and zero-point  
Energies= -3014.781320

Sum of electronic and thermal  
Enthalpies= -3014.757564

Sum of electronic and thermal Energies=  
-3014.758508

Sum of electronic and thermal Free  
Energies= -3014.835518

#### 6.1.11.8 Minimum geometry of radical cation of BBTT in gas phase (B3LYP/6-311++G\*\*)

#p opt freq=noraman ub3lyp/6-  
311++g(d,p) pop=full

0 1  
C O 5.479411 -2.236685 0.000272  
C O 4.625606 -3.350674 -0.000179  
C O 3.249923 -3.190588 -0.000240  
C O 2.711849 -1.891854 0.000156  
C O 3.588496 -0.783959 0.000547  
C O 4.970468 -0.941902 0.000643  
C O 1.337857 -1.472161 -0.000044  
C O 1.196359 -0.092049 0.000148  
S O 2.723415 0.755687 0.000747  
S O -0.000084 -2.590944 -0.000037  
C O -1.337963 -1.472090 -0.000007  
C O -1.196390 -0.091987 -0.000193  
N O 0.000003 0.590714 -0.000042  
C O -2.711980 -1.891710 -0.000182  
C O -3.588566 -0.783768 -0.000553  
S O -2.723403 0.755833 -0.000765  
C O -3.250127 -3.190414 0.000223  
C O -4.625819 -3.350423 0.000195  
C O -5.479563 -2.236387 -0.000233  
C O -4.970547 -0.941633 -0.000612  
C O 0.000037 2.032264 0.000001  
C O -0.000497 2.738817 1.212000

C O -0.000379 4.129011 1.212690  
C O 0.000253 4.812466 0.000070  
C O 0.000779 4.129072 -1.212584  
C O 0.000702 2.738877 -1.211962  
Cl O 0.001315 1.873387 -2.723991  
Cl O -0.001223 1.873251 2.723986  
H O 6.552506 -2.384472 0.000322  
H O 5.048952 -4.347426 -0.000529  
H O 2.600065 -4.058282 -0.000551  
H O 5.634304 -0.086139 0.001025  
H O -2.600319 -4.058146 0.000521  
H O -5.049221 -4.347151 0.000551  
H O -6.552666 -2.384114 -0.000256  
H O -5.634335 -0.085832 -0.000974  
H O -0.000679 4.662629 2.153799  
H O 0.000328 5.895811 0.000098  
H O 0.001167 4.662737 -2.153666

SCF Done: E(UB3LYP) = -  
3014.79258736

Sum of electronic and zero-point  
Energies= -3014.527355

Sum of electronic and thermal Energies=  
-3014.504667

Sum of electronic and thermal  
Enthalpies= -3014.503723

Sum of electronic and thermal Free  
Energies= -3014.581366

#### 6.1.11.9 Minimum geometry of radical cation of BBTT under IEFPCM variation of PCM

(B3LYP/6-311++G\*\*, IEFPCM CH<sub>2</sub>Cl<sub>2</sub>)

#p ub3lyp/6-311++g(d,p) opt  
freq=noraman scf=maxcycle=1000  
scrf=(iefpc  
m,solvent=dichloromethane) geom=check  
guess=read

0 1

C O 5.479362 -2.234833 0.000172  
C O 4.625356 -3.349163 -0.000067  
C O 3.248858 -3.189811 -0.000137  
C O 2.710718 -1.891304 0.000038  
C O 3.587008 -0.783010 0.000254

|      |           |           |           |                                         |           |           |           |
|------|-----------|-----------|-----------|-----------------------------------------|-----------|-----------|-----------|
| C 0  | 4.969725  | -0.940057 | 0.000334  | Cl 0                                    | -0.000587 | 1.872964  | 2.724864  |
| C 0  | 1.335990  | -1.473142 | -0.000065 | H 0                                     | 6.552571  | -2.381805 | 0.000222  |
| C 0  | 1.195483  | -0.093653 | 0.000049  | H 0                                     | 5.048405  | -4.346077 | -0.000213 |
| S 0  | 2.721517  | 0.755876  | 0.000277  | H 0                                     | 2.599036  | -4.057003 | -0.000306 |
| S 0  | -0.000008 | -2.592238 | -0.000018 | H 0                                     | 5.632404  | -0.083757 | 0.000512  |
| C 0  | -1.336000 | -1.473135 | 0.000037  | H 0                                     | -2.599073 | -4.056990 | 0.000303  |
| C 0  | -1.195484 | -0.093648 | -0.000076 | H 0                                     | -5.048443 | -4.346039 | 0.000236  |
| N 0  | 0.000001  | 0.589219  | -0.000022 | H 0                                     | -6.552591 | -2.381753 | -0.000191 |
| C 0  | -2.710733 | -1.891288 | -0.000052 | H 0                                     | -5.632401 | -0.083712 | -0.000501 |
| C 0  | -3.587013 | -0.782987 | -0.000265 | H 0                                     | -0.000423 | 4.663174  | 2.152221  |
| S 0  | -2.721511 | 0.755893  | -0.000302 | H 0                                     | 0.000065  | 5.894615  | 0.000061  |
| C 0  | -3.248885 | -3.189790 | 0.000136  | H 0                                     | 0.000507  | 4.663239  | -2.152136 |
| C 0  | -4.625385 | -3.349129 | 0.000081  | SCF Done: E(UB3LYP) = -                 |           |           |           |
| C 0  | -5.479380 | -2.234791 | -0.000154 | 3014.84268293                           |           |           |           |
| C 0  | -4.969731 | -0.940020 | -0.000327 | Sum of electronic and zero-point        |           |           |           |
| C 0  | 0.000004  | 2.030591  | 0.000003  | Energies= -3014.577593                  |           |           |           |
| C 0  | -0.000254 | 2.738482  | 1.210869  | Sum of electronic and thermal Energies= |           |           |           |
| C 0  | -0.000236 | 4.128290  | 1.212216  | -3014.554812                            |           |           |           |
| C 0  | 0.000048  | 4.811704  | 0.000045  | Sum of electronic and thermal           |           |           |           |
| C 0  | 0.000305  | 4.128327  | -1.212147 | Enthalpies= -3014.553868                |           |           |           |
| C 0  | 0.000279  | 2.738519  | -1.210842 | Sum of electronic and thermal Free      |           |           |           |
| Cl 0 | 0.000573  | 1.873046  | -2.724862 | Energies= -3014.632235                  |           |           |           |

#### 6.1.11.10 Minimum geometry of radical cation of BBTT under SMD variation of PCM

(B3LYP/6-311++G\*\*, SMD CH<sub>2</sub>Cl<sub>2</sub>)

```
#p opt freq=noraman ub3lyp/6-
311++g(d,p) pop=full
scrf=(SMD,solvent=dichloromethane)
0 1
```

|     |           |           |           |     |           |           |           |
|-----|-----------|-----------|-----------|-----|-----------|-----------|-----------|
| C 0 | -5.476966 | -2.240673 | -0.000472 | S 0 | -0.000259 | -2.589007 | 0.000331  |
| C 0 | -4.620818 | -3.353208 | 0.000404  | C 0 | 1.336814  | -1.470499 | 0.000067  |
| C 0 | -3.244514 | -3.191513 | 0.000584  | C 0 | 1.195397  | -0.091764 | 0.000337  |
| C 0 | -2.710753 | -1.891156 | -0.000153 | N 0 | 0.000007  | 0.591868  | 0.000143  |
| C 0 | -3.589366 | -0.784908 | -0.001034 | C 0 | 2.710318  | -1.891630 | 0.000314  |
| C 0 | -4.971526 | -0.943773 | -0.001171 | C 0 | 3.589150  | -0.785555 | 0.000977  |
| C 0 | -1.337162 | -1.470288 | 0.000294  | S 0 | 2.724384  | 0.755737  | 0.001297  |
| C 0 | -1.195487 | -0.091577 | -0.000139 | C 0 | 3.243797  | -3.192100 | -0.000420 |
| S 0 | -2.724307 | 0.756217  | -0.001362 | C 0 | 4.620066  | -3.354095 | -0.000458 |
|     |           |           |           | C 0 | 5.476438  | -2.241735 | 0.000194  |
|     |           |           |           | C 0 | 4.971280  | -0.944725 | 0.000890  |
|     |           |           |           | C 0 | 0.000159  | 2.032887  | 0.000009  |
|     |           |           |           | C 0 | 0.001340  | 2.742846  | -1.209700 |

|      |           |           |           |                                         |           |           |           |
|------|-----------|-----------|-----------|-----------------------------------------|-----------|-----------|-----------|
| C 0  | 0.001742  | 4.131695  | -1.213504 | H 0                                     | 5.637729  | -0.090537 | 0.001334  |
| C 0  | 0.000954  | 4.814634  | -0.000397 | H 0                                     | 0.002729  | 4.669050  | -2.152728 |
| C 0  | -0.000240 | 4.132065  | 1.212914  | H 0                                     | 0.001260  | 5.898086  | -0.000566 |
| C 0  | -0.000653 | 2.743202  | 1.209530  | H 0                                     | -0.000964 | 4.669723  | 2.151963  |
| Cl 0 | -0.001852 | 1.873587  | 2.725902  | SCF Done: E(UB3LYP) = -                 |           |           |           |
| Cl 0 | 0.001999  | 1.872725  | -2.725764 | 3014.87031681                           |           |           |           |
| H 0  | -6.550070 | -2.390618 | -0.000633 | Sum of electronic and zero-point        |           |           |           |
| H 0  | -5.041990 | -4.351263 | 0.000981  | Energies= -3014.604809                  |           |           |           |
| H 0  | -2.593271 | -4.058390 | 0.001269  | Sum of electronic and thermal Energies= |           |           |           |
| H 0  | -5.637771 | -0.089426 | -0.001794 | -3014.582254                            |           |           |           |
| H 0  | 2.592351  | -4.058825 | -0.000953 | Sum of electronic and thermal           |           |           |           |
| H 0  | 5.041032  | -4.352237 | -0.001045 | Enthalpies= -3014.581309                |           |           |           |
| H 0  | 6.549513  | -2.391902 | 0.000182  | Sum of electronic and thermal Free      |           |           |           |
|      |           |           |           | Energies= -3014.658359                  |           |           |           |

#### 6.1.11.11 Transition state of native BTT under IEFPCM variation of PCM

(B3LYP/6-311++G\*\*, IEFPCM CH<sub>2</sub>Cl<sub>2</sub>)

```
#p opt=(ts,noeigen,calcfc) freq=noraman
B3LYP/6-311++g(d,p) scrf=(iefp
cm,solvent=dichloromethane)
0 1
```

|     |           |           |           |      |           |           |           |
|-----|-----------|-----------|-----------|------|-----------|-----------|-----------|
| C 0 | 5.499630  | -2.248803 | 0.000172  | C 0  | -5.499630 | -2.248797 | -0.000688 |
| C 0 | 4.635201  | -3.353885 | 0.000231  | C 0  | -4.992319 | -0.951932 | -0.000595 |
| C 0 | 3.256688  | -3.183349 | 0.000213  | C 0  | -0.000001 | 2.030146  | 0.000052  |
| C 0 | 2.720778  | -1.883832 | 0.000125  | C 0  | 0.000522  | 2.756270  | -1.202773 |
| C 0 | 3.609731  | -0.783716 | 0.000055  | C 0  | 0.000562  | 4.146320  | -1.210736 |
| C 0 | 4.992320  | -0.951937 | 0.000083  | C 0  | 0.000003  | 4.832480  | -0.000046 |
| C 0 | 1.344638  | -1.465492 | 0.000159  | C 0  | -0.000555 | 4.146406  | 1.210693  |
| C 0 | 1.200104  | -0.111926 | 0.000119  | C 0  | -0.000518 | 2.756355  | 1.202825  |
| S 0 | 2.739472  | 0.747181  | -0.000024 | Cl 0 | 0.001042  | 1.896215  | -2.725967 |
| S 0 | -0.000000 | -2.644960 | 0.000612  | Cl 0 | -0.001039 | 1.896401  | 2.726075  |
| C 0 | -1.344639 | -1.465492 | 0.000114  | H 0  | 6.572307  | -2.402210 | 0.000195  |
| C 0 | -1.200105 | -0.111927 | 0.000042  | H 0  | 5.049039  | -4.355659 | 0.000295  |
| N 0 | -0.000001 | 0.606985  | 0.000101  | H 0  | 2.599813  | -4.045915 | 0.000255  |
| C 0 | -2.720780 | -1.883830 | -0.000111 | H 0  | 5.658316  | -0.097165 | 0.000041  |
| C 0 | -3.609729 | -0.783710 | -0.000303 | H 0  | -2.599816 | -4.045914 | -0.000101 |
| S 0 | -2.739477 | 0.747176  | -0.000226 | H 0  | -5.049043 | -4.355654 | -0.000594 |
| C 0 | -3.256691 | -3.183347 | -0.000225 | H 0  | -6.572307 | -2.402202 | -0.000909 |
| C 0 | -4.635203 | -3.353881 | -0.000505 | H 0  | -5.658314 | -0.097159 | -0.000756 |
|     |           |           |           | H 0  | 0.000995  | 4.679798  | -2.151701 |
|     |           |           |           | H 0  | 0.000003  | 5.915657  | -0.000085 |
|     |           |           |           | H 0  | -0.000984 | 4.679950  | 2.151621  |

SCF Done: E(RB3LYP) = -  
3015.02117147

Sum of electronic and zero-point  
Energies= -3014.756927

Sum of electronic and thermal Energies=  
-3014.734866

Sum of electronic and thermal  
Enthalpies= -3014.733922

Sum of electronic and thermal Free  
Energies= -3014.809589

### 6.1.12 *anti-anti-N-ortho,ortho'*-chlorofluorophenyl-BBTT 3o

#### 6.1.12.1 Minimum geometry of native BBTT in gas phase (B3LYP/6-311++G\*\*)

Conformer I:

#p opt freq=noraman rb3lyp/6-311++g(d,p)  
pop=full

0 1

C 0 -5.358071 -2.365358 -0.465305  
C 0 -4.511371 -3.344087 0.076033  
C 0 -3.173627 -3.071063 0.324222  
C 0 -2.660393 -1.799252 0.024388  
C 0 -3.526969 -0.828404 -0.529775  
C 0 -4.872436 -1.098455 -0.771375  
C 0 -1.333728 -1.278545 0.224228  
C 0 -1.196224 0.011761 -0.182212  
S 0 -2.684067 0.681145 -0.861062  
S 0 0.000963 -2.201629 0.967776  
C 0 1.335396 -1.277419 0.225040  
C 0 1.197142 0.012806 -0.181503  
N 0 0.000157 0.742027 -0.195528  
C 0 2.662623 -1.797055 0.026161  
C 0 3.528786 -0.825620 -0.527434  
S 0 2.684975 0.683237 -0.859458  
C 0 3.176737 -3.068419 0.326706  
C 0 4.514906 -3.340314 0.079696  
C 0 5.361188 -2.360944 -0.461199  
C 0 4.874696 -1.094538 -0.767912  
C 0 -0.000690 2.154206 -0.009770  
C 0 0.001966 3.012640 -1.113635  
C 0 0.001008 4.392642 -0.991031  
C 0 -0.002890 4.944297 0.286098  
C 0 -0.005612 4.130464 1.416159  
C 0 -0.004393 2.747850 1.263238

Cl 0 -0.007786 1.730043 2.679565  
F 0 0.005448 2.471602 -2.345735  
H 0 -6.400387 -2.596848 -0.651022  
H 0 -4.908281 -4.326564 0.304228  
H 0 -2.523713 -3.832362 0.740547  
H 0 -5.524683 -0.342929 -1.193695  
H 0 2.527110 -3.830246 0.742390  
H 0 4.912450 -4.322439 0.308330  
H 0 6.403885 -2.591488 -0.645962  
H 0 5.526642 -0.338505 -1.189852  
H 0 0.003144 5.005755 -1.882915  
H 0 -0.003688 6.021221 0.404630  
H 0 -0.008421 4.557864 2.410000

SCF Done: E(RB3LYP) = -  
2654.65983256

Sum of electronic and zero-point  
Energies= -2654.393786

Sum of electronic and thermal Energies=  
-2654.371319

Sum of electronic and thermal  
Enthalpies= -2654.370375

Sum of electronic and thermal Free  
Energies= -2654.448176

Conformer II:

#p opt freq=noraman rb3lyp/6-311++g(d,p)  
pop=full

0 1

C 0 5.357181 -2.376887 -0.441087  
C 0 4.512776 -3.362955 0.091165  
C 0 3.175343 -3.093810 0.343761  
C 0 2.661368 -1.818785 0.059829  
C 0 3.524616 -0.839977 -0.485159

|      |           |           |           |                                         |           |              |           |
|------|-----------|-----------|-----------|-----------------------------------------|-----------|--------------|-----------|
| C O  | 4.870333  | -1.107479 | -0.732363 | F O                                     | 0.000814  | 1.248831     | 2.597341  |
| C O  | 1.334220  | -1.300789 | 0.269454  | H O                                     | 6.399470  | -2.605294    | -0.631022 |
| C O  | 1.194245  | -0.005012 | -0.117000 | H O                                     | 4.911203  | -4.347423    | 0.307708  |
| S O  | 2.678836  | 0.669439  | -0.802374 | H O                                     | 2.526966  | -3.860374    | 0.752694  |
| S O  | 0.000081  | -2.245771 | 0.979834  | H O                                     | 5.521356  | -0.346885    | -1.147439 |
| C O  | -1.334255 | -1.300804 | 0.269528  | H O                                     | -2.526829 | -3.860514    | 0.752410  |
| C O  | -1.194325 | -0.004990 | -0.116891 | H O                                     | -4.911110 | -4.347576    | 0.307508  |
| N O  | -0.000053 | 0.736518  | -0.112824 | H O                                     | -6.399542 | -2.605274    | -0.630629 |
| C O  | -2.661417 | -1.818784 | 0.060056  | H O                                     | -5.521643 | -0.346675    | -1.146407 |
| C O  | -3.524728 | -0.839827 | -0.484606 | H O                                     | 0.000970  | 3.701351     | 3.394091  |
| S O  | -2.679039 | 0.669442  | -0.801891 | H O                                     | 0.000413  | 5.678673     | 1.856386  |
| C O  | -3.175318 | -3.093899 | 0.343737  | H O                                     | -0.000210 | 5.334385     | -0.600939 |
| C O  | -4.512737 | -3.363041 | 0.091212  | SCF Done: E(RB3LYP) = -                 |           |              |           |
| C O  | -5.357248 | -2.376868 | -0.440726 | 2654.65963517                           |           |              |           |
| C O  | -4.870487 | -1.107384 | -0.731748 | Sum of electronic and zero-point        |           |              |           |
| C O  | 0.000077  | 2.073889  | 0.393812  | Energies=                               |           | -2654.393519 |           |
| C O  | 0.000541  | 2.310648  | 1.772844  | Sum of electronic and thermal Energies= |           | -2654.371140 |           |
| C O  | 0.000671  | 3.582681  | 2.318157  | Sum of electronic and thermal           |           |              |           |
| C O  | 0.000361  | 4.673300  | 1.452674  | Enthalpies=                             |           | -2654.370196 |           |
| C O  | -0.000009 | 4.488724  | 0.073519  | Sum of electronic and thermal Free      |           |              |           |
| C O  | -0.000187 | 3.196424  | -0.445650 | Energies=                               |           | -2654.446997 |           |
| Cl O | -0.000717 | 2.978500  | -2.180993 |                                         |           |              |           |

### 6.1.12.2 Minimum geometry of native BBT under IEFPCM variation of PCM

(B3LYP/6-311++G\*\*, IEFPCM CH<sub>2</sub>Cl<sub>2</sub>)

|                                          |     |           |           |           |
|------------------------------------------|-----|-----------|-----------|-----------|
| Conformer I:                             | C O | -1.197121 | -0.009257 | -0.097184 |
| #p opt freq=noraman rb3lyp/6-311++g(d,p) | S O | -2.695066 | 0.714544  | -0.689736 |
| scrf=(iefpcm,solvent=dichloro            | S O | 0.000101  | -2.300468 | 0.904024  |
| methane) pop=full geom=check             | C O | 1.335852  | -1.322760 | 0.229978  |
| guess=read                               | C O | 1.197161  | -0.009193 | -0.097264 |
| 0 1                                      | N O | 0.000002  | 0.716607  | -0.080124 |
| C O                                      | C O | 2.670105  | -1.821469 | 0.025003  |
| C O                                      | C O | 3.540891  | -0.812441 | -0.449663 |
| C O                                      | S O | 2.695059  | 0.714693  | -0.689819 |
| C O                                      | C O | 3.187200  | -3.107550 | 0.253523  |
| C O                                      | C O | 4.531728  | -3.356212 | 0.010920  |
| C O                                      | C O | 5.381199  | -2.339960 | -0.453157 |
| C O                                      | C O | 4.892307  | -1.057593 | -0.685874 |



C O -0.000065 2.139544 -0.029788  
 C O 0.000086 2.893179 -1.207744  
 C O 0.000010 4.277482 -1.213955  
 C O -0.000245 4.943086 0.008162  
 C O -0.000410 4.236878 1.209462  
 C O -0.000310 2.847111 1.183023  
 Cl O -0.000481 1.957958 2.687847  
 F O 0.000289 2.234203 -2.385487  
 H O -6.427689 -2.553435 -0.635657  
 H O -4.930879 -4.349273 0.183251  
 H O -2.537971 -3.898608 0.612237  
 H O -5.546335 -0.273215 -1.047213  
 H O 2.538298 -3.898417 0.612342  
 H O 4.931298 -4.348852 0.183642  
 H O 6.428005 -2.552887 -0.635222  
 H O 5.546481 -0.272771 -1.046883  
 H O 0.000137 4.809126 -2.156521  
 H O -0.000313 6.025907 0.027530  
 H O -0.000612 4.757334 2.157666  
 SCF Done: E(RB3LYP) = -  
 2654.66820606  
 Sum of electronic and zero-point  
 Energies= -2654.402297  
 Sum of electronic and thermal Energies=  
 -2654.379806  
 Sum of electronic and thermal  
 Enthalpies= -2654.378862  
 Sum of electronic and thermal Free  
 Energies= -2654.456479  
 Conformer II:  
 #p opt freq=noraman rb3lyp/6-311++g(d,p)  
 scrf=(iefpcm,solvent=dichloro  
 methane) pop=full geom=check  
 guess=read  
 0 1  
 C O 5.369559 -2.364231 -0.432724  
 C O 4.522577 -3.365997 0.066833  
 C O 3.181134 -3.107038 0.313783  
 C O 2.666244 -1.826096 0.055597  
 C O 3.532914 -0.831566 -0.455377

C O 4.882276 -1.087906 -0.696377  
 C O 1.335456 -1.316313 0.264396  
 C O 1.194951 -0.011147 -0.090535  
 S O 2.686376 0.686189 -0.736982  
 S O -0.000196 -2.282788 0.947806  
 C O -1.335700 -1.316141 0.264346  
 C O -1.195014 -0.010994 -0.090588  
 N O 0.000018 0.726725 -0.082435  
 C O -2.666551 -1.825749 0.055515  
 C O -3.533078 -0.831108 -0.455481  
 S O -2.686329 0.686529 -0.737087  
 C O -3.181615 -3.106622 0.313695  
 C O -4.523086 -3.365407 0.066711  
 C O -5.369926 -2.363532 -0.432866  
 C O -4.882469 -1.087270 -0.696510  
 C O 0.000100 2.078182 0.386181  
 C O 0.000034 2.350454 1.758018  
 C O 0.000126 3.633841 2.272965  
 C O 0.000325 4.702110 1.379123  
 C O 0.000455 4.483710 0.004145  
 C O 0.000290 3.179185 -0.481306  
 Cl O 0.000608 2.914827 -2.213497  
 F O -0.000150 1.302620 2.608351  
 H O 6.414244 -2.584802 -0.618141  
 H O 4.921768 -4.354331 0.263153  
 H O 2.533463 -3.885864 0.700128  
 H O 5.535292 -0.315325 -1.084749  
 H O -2.534055 -3.885531 0.700059  
 H O -4.922409 -4.353688 0.263025  
 H O -6.414635 -2.583966 -0.618308  
 H O -5.535376 -0.314605 -1.084896  
 H O 0.000041 3.782897 3.344980  
 H O 0.000379 5.716897 1.757405  
 H O 0.000571 5.314509 -0.688359  
 SCF Done: E(RB3LYP) = -  
 2654.66778754  
 Sum of electronic and zero-point  
 Energies= -2654.401762

Sum of electronic and thermal Energies=  
-2654.379369

Sum of electronic and thermal  
Enthalpies= -2654.378425

Sum of electronic and thermal Free  
Energies= -2654.455218

### 6.1.12.3 Minimum geometry of native BBTT under SMD variation of PCM (B3LYP/6-311++G\*\*,

#### SMD CH<sub>2</sub>Cl<sub>2</sub>)

Conformer I:

#p opt freq=noraman rb3lyp/6-311++g(d,p)  
pop=full scrf=(SMD,solvent=di

chloromethane) geom=check guess=read

0 1

C 0 -5.385264 -2.338269 -0.445622

C 0 -4.535130 -3.353988 0.018597

C 0 -3.189326 -3.106719 0.255984

C 0 -2.671403 -1.821921 0.020929

C 0 -3.543431 -0.814020 -0.453747

C 0 -4.896127 -1.057076 -0.684706

C 0 -1.336667 -1.321796 0.223048

C 0 -1.196853 -0.009176 -0.106877

S 0 -2.696254 0.712541 -0.701272

S 0 0.000009 -2.296501 0.900841

C 0 1.336693 -1.321773 0.223097

C 0 1.196868 -0.009156 -0.106831

N 0 0.000001 0.717241 -0.088015

C 0 2.671427 -1.821895 0.020967

C 0 3.543450 -0.813990 -0.453710

S 0 2.696287 0.712593 -0.701141

C 0 3.189346 -3.106703 0.255984

C 0 4.535142 -3.353978 0.018559

C 0 5.385266 -2.338249 -0.445658

C 0 4.896140 -1.057050 -0.684709

C 0 -0.000012 2.140726 -0.027663

C 0 0.000006 2.901601 -1.200815

C 0 -0.000003 4.285294 -1.200869

C 0 -0.000032 4.943871 0.024945

C 0 -0.000051 4.231855 1.223279

C 0 -0.000041 2.842749 1.188798

Cl 0 -0.000059 1.943296 2.690817

F 0 0.000043 2.246763 -2.383254

H 0 -6.433200 -2.550968 -0.623254

H 0 -4.935289 -4.345856 0.196197

H 0 -2.542369 -3.899023 0.615974

H 0 -5.551544 -0.272610 -1.045564

H 0 2.542389 -3.899011 0.615966

H 0 4.935302 -4.345850 0.196132

H 0 6.433204 -2.550936 -0.623295

H 0 5.551552 -0.272584 -1.045573

H 0 0.000014 4.821770 -2.141261

H 0 -0.000039 6.027027 0.050307

H 0 -0.000072 4.750296 2.173128

SCF Done: E(RB3LYP) = -  
2654.69143133

Sum of electronic and zero-point  
Energies= -2654.425610

Sum of electronic and thermal Energies=  
-2654.403134

Sum of electronic and thermal  
Enthalpies= -2654.402189

Sum of electronic and thermal Free  
Energies= -2654.479682

Conformer II:

#p opt freq=noraman rb3lyp/6-311++g(d,p)  
pop=full scrf=(SMD,solvent=di

chloromethane) geom=check guess=read

0 1

C 0 5.377062 -2.358166 -0.422667

C 0 4.528090 -3.365905 0.061375

C 0 3.184371 -3.112041 0.301856

C 0 2.668791 -1.829540 0.051408

C 0 3.538060 -0.829593 -0.444268

C 0 4.889658 -1.080106 -0.678455

|      |           |           |           |                                         |           |           |           |
|------|-----------|-----------|-----------|-----------------------------------------|-----------|-----------|-----------|
| C 0  | 1.336548  | -1.321892 | 0.258656  | F 0                                     | 0.000037  | 1.323374  | 2.614197  |
| C 0  | 1.195067  | -0.013685 | -0.084686 | H 0                                     | 6.423653  | -2.575583 | -0.602769 |
| S 0  | 2.690068  | 0.690100  | -0.718210 | H 0                                     | 4.927575  | -4.355662 | 0.251565  |
| S 0  | 0.000054  | -2.294820 | 0.933184  | H 0                                     | 2.537727  | -3.897418 | 0.677267  |
| C 0  | -1.336480 | -1.321942 | 0.258665  | H 0                                     | 5.544945  | -0.302977 | -1.054978 |
| C 0  | -1.195049 | -0.013729 | -0.084676 | H 0                                     | -2.537568 | -3.897509 | 0.677287  |
| N 0  | -0.000005 | 0.723274  | -0.071917 | H 0                                     | -4.927404 | -4.355834 | 0.251605  |
| C 0  | -2.668706 | -1.829636 | 0.051426  | H 0                                     | -6.423549 | -2.575807 | -0.602718 |
| C 0  | -3.538013 | -0.829720 | -0.444243 | H 0                                     | -5.544921 | -0.303172 | -1.054939 |
| S 0  | -2.690076 | 0.690002  | -0.718197 | H 0                                     | -0.000022 | 3.810161  | 3.329122  |
| C 0  | -3.184240 | -3.112155 | 0.301879  | H 0                                     | -0.000111 | 5.730687  | 1.724507  |
| C 0  | -4.527953 | -3.366065 | 0.061410  | H 0                                     | -0.000163 | 5.308908  | -0.716776 |
| C 0  | -5.376964 | -2.358354 | -0.422626 | SCF Done: E(RB3LYP) = -                 |           |           |           |
| C 0  | -4.889605 | -1.080279 | -0.678420 | 2654.69103402                           |           |           |           |
| C 0  | -0.000032 | 2.079462  | 0.384401  | Sum of electronic and zero-point        |           |           |           |
| C 0  | -0.000015 | 2.364879  | 1.753395  | Energies= -2654.425119                  |           |           |           |
| C 0  | -0.000043 | 3.651818  | 2.257867  | Sum of electronic and thermal Energies= |           |           |           |
| C 0  | -0.000093 | 4.712321  | 1.355040  | -2654.402731                            |           |           |           |
| C 0  | -0.000125 | 4.482542  | -0.018304 | Sum of electronic and thermal           |           |           |           |
| C 0  | -0.000086 | 3.174082  | -0.491604 | Enthalpies= -2654.401787                |           |           |           |
| Cl 0 | -0.000156 | 2.895450  | -2.224500 | Sum of electronic and thermal Free      |           |           |           |
|      |           |           |           | Energies= -2654.478458                  |           |           |           |

#### 6.1.12.4 Minimum geometry of radical cation of BBTT in gas phase (B3LYP/6-311++G\*\*)

|                                                   |           |           |           |           |           |           |           |
|---------------------------------------------------|-----------|-----------|-----------|-----------|-----------|-----------|-----------|
| #p opt freq=noraman ub3lyp/6-311++g(d,p) pop=full | N 0       | -0.000000 | 0.642874  | -0.111316 |           |           |           |
| 0 1                                               | C 0       | 2.712195  | -1.838150 | -0.023858 |           |           |           |
| C 0                                               | -5.479716 | -2.182790 | -0.029126 | C 0       | 3.588607  | -0.731367 | -0.078526 |
| C 0                                               | -4.626229 | -3.295622 | 0.025596  | S 0       | 2.722909  | 0.807142  | -0.139384 |
| C 0                                               | -3.250514 | -3.135664 | 0.028493  | C 0       | 3.250521  | -3.135659 | 0.028493  |
| C 0                                               | -2.712191 | -1.838154 | -0.023858 | C 0       | 4.626236  | -3.295614 | 0.025595  |
| C 0                                               | -3.588605 | -0.731373 | -0.078526 | C 0       | 5.479721  | -2.182781 | -0.029126 |
| C 0                                               | -4.970527 | -0.889144 | -0.082186 | C 0       | 4.970529  | -0.889136 | -0.082186 |
| C 0                                               | -1.337995 | -1.418822 | -0.033024 | C 0       | -0.000003 | 2.080405  | -0.185824 |
| C 0                                               | -1.196551 | -0.040079 | -0.091796 | C 0       | -0.000005 | 2.699816  | -1.438817 |
| S 0                                               | -2.722911 | 0.807138  | -0.139383 | C 0       | -0.000006 | 4.076247  | -1.571794 |
| S 0                                               | 0.000003  | -2.536222 | 0.024111  | C 0       | -0.000006 | 4.851034  | -0.414272 |
| C 0                                               | 1.337998  | -1.418820 | -0.033024 | C 0       | -0.000005 | 4.266123  | 0.850636  |
| C 0                                               | 1.196552  | -0.040077 | -0.091796 | C 0       | -0.000004 | 2.880358  | 0.966054  |
|                                                   |           |           |           | Cl 0      | -0.000002 | 2.132171  | 2.537330  |

F 0 -0.000004 1.917055 -2.528111  
H 0 -6.552803 -2.330568 -0.030532  
H 0 -5.049843 -4.291433 0.065971  
H 0 -2.600966 -4.002545 0.070598  
H 0 -5.634191 -0.034325 -0.124693  
H 0 2.600975 -4.002541 0.070598  
H 0 5.049852 -4.291424 0.065970  
H 0 6.552808 -2.330557 -0.030533  
H 0 5.634192 -0.034315 -0.124694  
H 0 -0.000007 4.517277 -2.560138

H 0 -0.000007 5.931001 -0.497561  
H 0 -0.000005 4.875613 1.744342

SCF Done: E(UB3LYP) = -  
2654.43796099

Sum of electronic and zero-point  
Energies= -2654.171205

Sum of electronic and thermal Energies=  
-2654.148890

Sum of electronic and thermal  
Enthalpies= -2654.147945

Sum of electronic and thermal Free  
Energies= -2654.224708

#### 6.1.12.5 Minimum geometry of radical cation of BBTT under SMD variation of PCM

(B3LYP/6-311++G\*\*, SMD CH<sub>2</sub>Cl<sub>2</sub>)

#p opt freq=noraman ub3lyp/6-  
311++g(d,p) pop=full  
scrf=(SMD,solvent=di  
chloromethane)

0 1

C 0 -5.476768 -2.190700 -0.025577  
C 0 -4.620374 -3.302384 0.011999  
C 0 -3.244140 -3.140110 0.016641  
C 0 -2.710742 -1.840083 -0.017045  
C 0 -3.589531 -0.734806 -0.057012  
C 0 -4.971625 -0.894180 -0.061042  
C 0 -1.337076 -1.418972 -0.022734  
C 0 -1.195661 -0.041072 -0.067139  
S 0 -2.724620 0.806300 -0.102017  
S 0 0.000002 -2.536949 0.013646  
C 0 1.337079 -1.418970 -0.022733  
C 0 1.195663 -0.041070 -0.067138  
N 0 0.000000 0.642576 -0.082130  
C 0 2.710746 -1.840080 -0.017042  
C 0 3.589533 -0.734802 -0.057008  
S 0 2.724619 0.806303 -0.102013  
C 0 3.244145 -3.140107 0.016643  
C 0 4.620379 -3.302378 0.012001  
C 0 5.476772 -2.190693 -0.025573  
C 0 4.971627 -0.894174 -0.061037

C 0 -0.000001 2.077673 -0.191207

C 0 0.000003 2.665870 -1.458949

C 0 0.000003 4.036135 -1.632353

C 0 -0.000002 4.842229 -0.496965

C 0 -0.000007 4.293038 0.784161

C 0 -0.000006 2.912013 0.935593

Cl 0 -0.000012 2.205815 2.533838

F 0 0.000007 1.850376 -2.530715

H 0 -6.549816 -2.341038 -0.027897

H 0 -5.041242 -4.300234 0.037553

H 0 -2.592746 -4.006396 0.044902

H 0 -5.638116 -0.040548 -0.090579

H 0 2.592752 -4.006393 0.044903

H 0 5.041248 -4.300228 0.037555

H 0 6.549820 -2.341029 -0.027892

H 0 5.638117 -0.040541 -0.090572

H 0 0.000006 4.450611 -2.632375

H 0 -0.000002 5.919382 -0.609894

H 0 -0.000010 4.931413 1.657653

SCF Done: E(UB3LYP) = -  
2654.51507983

Sum of electronic and zero-point  
Energies= -2654.248364

Sum of electronic and thermal Energies=  
-2654.226112

Sum of electronic and thermal  
Enthalpies= -2654.225168

Sum of electronic and thermal Free  
Energies= -2654.301914

### 6.1.13 *anti-anti-N-ortho,ortho'*-chloromethylphenyl-BBTT 3p

#### 6.1.13.1 Minimum geometry of native BBTT in gas phase (B3LYP/6-311++G\*\*)

Conformer I:

#p opt freq=noraman rb3lyp/6-311++g(d,p)  
pop=full

0 1

C 0 -5.480703 -2.207508 -0.187459  
C 0 -4.616748 -3.296233 -0.001734  
C 0 -3.243616 -3.112108 0.086073  
C 0 -2.711111 -1.816050 -0.015966  
C 0 -3.599033 -0.732374 -0.207019  
C 0 -4.976576 -0.914334 -0.291377  
C 0 -1.341469 -1.385345 0.057739  
C 0 -1.197570 -0.039057 -0.084988  
S 0 -2.734478 0.797666 -0.313593  
S 0 0.000087 -2.525813 0.365466  
C 0 1.341571 -1.385274 0.057713  
C 0 1.197615 -0.038986 -0.084991  
N 0 0.000003 0.681820 -0.103695  
C 0 2.711238 -1.815908 -0.015951  
C 0 3.599118 -0.732187 -0.206944  
S 0 2.734483 0.797819 -0.313484  
C 0 3.243812 -3.111943 0.086058  
C 0 4.616956 -3.295992 -0.001722  
C 0 5.480862 -2.207220 -0.187391  
C 0 4.976671 -0.914068 -0.291283  
C 0 -0.000059 2.113219 -0.131737  
C 0 -0.000014 2.791126 -1.366124  
C 0 -0.000096 4.188419 -1.353988  
C 0 -0.000211 4.899483 -0.157610  
C 0 -0.000251 4.231746 1.062156  
C 0 -0.000173 2.841245 1.067311  
Cl 0 -0.000203 1.998767 2.599942  
C 0 0.000067 2.031119 -2.668994  
H 0 -6.550006 -2.371194 -0.251671  
H 0 -5.027423 -4.296393 0.075890

H 0 -2.584585 -3.960970 0.228679  
H 0 -5.641991 -0.070969 -0.435405  
H 0 2.584823 -3.960845 0.228616  
H 0 5.027679 -4.296134 0.075882  
H 0 6.550175 -2.370852 -0.251580  
H 0 5.642042 -0.070662 -0.435270  
H 0 -0.000074 4.723004 -2.297106  
H 0 -0.000273 5.983412 -0.172038  
H 0 -0.000338 4.772758 1.999228  
H 0 0.880407 1.389434 -2.755436  
H 0 -0.880186 1.389320 -2.755438  
H 0 0.000028 2.722966 -3.512344

SCF Done: E(RB3LYP) = -  
2594.72350812

Sum of electronic and zero-point  
Energies= -2594.421972

Sum of electronic and thermal Energies=  
-2594.398546

Sum of electronic and thermal  
Enthalpies= -2594.397602

Sum of electronic and thermal Free  
Energies= -2594.477517

Conformer II:

#p opt freq=noraman rb3lyp/6-311++g(d,p)  
pop=full

0 1

C 0 5.392761 -2.315222 -0.415507  
C 0 4.538403 -3.356604 -0.023663  
C 0 3.189816 -3.123874 0.206552  
C 0 2.673319 -1.828723 0.039900  
C 0 3.548033 -0.793295 -0.364246  
C 0 4.903913 -1.024353 -0.587583  
C 0 1.335827 -1.344127 0.252278  
C 0 1.195321 -0.014754 -0.006358  
S 0 2.701780 0.739129 -0.542928

|      |           |           |           |                                         |           |           |           |
|------|-----------|-----------|-----------|-----------------------------------------|-----------|-----------|-----------|
| S O  | -0.000021 | -2.363032 | 0.857839  | H O                                     | 2.534556  | -3.934035 | 0.505867  |
| C O  | -1.335731 | -1.344176 | 0.252242  | H O                                     | 5.562079  | -0.219793 | -0.894553 |
| C O  | -1.195293 | -0.014789 | -0.006346 | H O                                     | -2.534379 | -3.934117 | 0.505777  |
| N O  | 0.000007  | 0.713150  | 0.030917  | H O                                     | -4.937367 | -4.356821 | 0.100840  |
| C O  | -2.673228 | -1.828800 | 0.039854  | H O                                     | -6.443225 | -2.516336 | -0.589915 |
| C O  | -3.547990 | -0.793416 | -0.364268 | H O                                     | -5.562035 | -0.219984 | -0.894641 |
| S O  | -2.701758 | 0.739113  | -0.542895 | H O                                     | -0.000137 | 4.149449  | 3.086831  |
| C O  | -3.189673 | -3.123970 | 0.206496  | H O                                     | -0.000113 | 5.866156  | 1.306911  |
| C O  | -4.538262 | -3.356748 | -0.023705 | H O                                     | -0.000068 | 5.184392  | -1.083126 |
| C O  | -5.392658 | -2.315400 | -0.415539 | H O                                     | -0.878533 | 0.794463  | 2.751941  |
| C O  | -4.903851 | -1.024509 | -0.587620 | H O                                     | 0.878169  | 0.794319  | 2.751911  |
| C O  | -0.000028 | 2.106626  | 0.378462  | H O                                     | -0.000079 | 1.913266  | 3.805050  |
| C O  | -0.000079 | 2.485735  | 1.734428  | SCF Done: E(RB3LYP) = -                 |           |           |           |
| C O  | -0.000110 | 3.846692  | 2.045716  | 2594.72415714                           |           |           |           |
| C O  | -0.000097 | 4.814391  | 1.044489  | Sum of electronic and zero-point        |           |           |           |
| C O  | -0.000066 | 4.443389  | -0.294655 | Energies= -2594.422418                  |           |           |           |
| C O  | -0.000039 | 3.089871  | -0.619764 | Sum of electronic and thermal Energies= |           |           |           |
| Cl O | -0.000047 | 2.633062  | -2.312254 | -2594.399179                            |           |           |           |
| C O  | -0.000125 | 1.441785  | 2.821463  | Sum of electronic and thermal           |           |           |           |
| H O  | 6.443342  | -2.516123 | -0.589879 | Enthalpies= -2594.398234                |           |           |           |
| H O  | 4.937546  | -4.356664 | 0.100862  | Sum of electronic and thermal Free      |           |           |           |
|      |           |           |           | Energies= -2594.476587                  |           |           |           |

### 6.1.13.2 Minimum geometry of native BBT under IEFPCM variation of PCM

(B3LYP/6-311++G\*\*, IEFPCM CH<sub>2</sub>Cl<sub>2</sub>)

|                                        |           |           |           |           |           |           |           |
|----------------------------------------|-----------|-----------|-----------|-----------|-----------|-----------|-----------|
| Conformer I:                           | S O       | -2.715551 | 0.765464  | -0.531126 |           |           |           |
| #p opt=verytight int=ultrafine         | S O       | -0.000000 | -2.410361 | 0.686090  |           |           |           |
| freq=norman rb3lyp/6-311++g(d,p) scrf= | C O       | 1.338649  | -1.351402 | 0.152543  |           |           |           |
| (pcm,solvent=dichloromethane) pop=full | C O       | 1.195571  | -0.019315 | -0.092924 |           |           |           |
| geom=checkpoint guess=read             | N O       | -0.000000 | 0.702467  | -0.096964 |           |           |           |
| 0 1                                    | C O       | 2.691536  | -1.814540 | -0.001125 |           |           |           |
| C O                                    | -5.435186 | -2.263710 | -0.354080 | C O       | 3.571724  | -0.764146 | -0.353214 |
| C O                                    | -4.577908 | -3.320028 | -0.009981 | S O       | 2.715551  | 0.765464  | -0.531127 |
| C O                                    | -3.217268 | -3.106634 | 0.169807  | C O       | 3.217268  | -3.106634 | 0.169806  |
| C O                                    | -2.691536 | -1.814539 | -0.001125 | C O       | 4.577908  | -3.320028 | -0.009981 |
| C O                                    | -3.571724 | -0.764145 | -0.353214 | C O       | 5.435185  | -2.263710 | -0.354080 |
| C O                                    | -4.937797 | -0.974714 | -0.527372 | C O       | 4.937797  | -0.974714 | -0.527373 |
| C O                                    | -1.338649 | -1.351402 | 0.152543  | C O       | 0.000000  | 2.136117  | -0.069084 |
| C O                                    | -1.195571 | -0.019315 | -0.092923 | C O       | -0.000000 | 2.875517  | -1.264932 |

|                                          |           |           |           |      |           |           |           |
|------------------------------------------|-----------|-----------|-----------|------|-----------|-----------|-----------|
| C 0                                      | -0.000000 | 4.274133  | -1.177682 | C 0  | 3.585760  | -0.737858 | -0.146042 |
| C 0                                      | 0.000000  | 4.922436  | 0.050159  | C 0  | 4.958092  | -0.919952 | -0.300828 |
| C 0                                      | 0.000001  | 4.191508  | 1.237444  | C 0  | 1.340711  | -1.391852 | 0.200436  |
| C 0                                      | 0.000000  | 2.806621  | 1.166753  | C 0  | 1.196459  | -0.039561 | 0.118523  |
| Cl 0                                     | 0.000001  | 1.880481  | 2.657490  | S 0  | 2.724746  | 0.798576  | -0.157731 |
| C 0                                      | -0.000001 | 2.216855  | -2.622975 | S 0  | 0.000032  | -2.523731 | 0.548698  |
| H 0                                      | -6.494266 | -2.449677 | -0.488272 | C 0  | -1.340675 | -1.391878 | 0.200457  |
| H 0                                      | -4.983838 | -4.316772 | 0.118983  | C 0  | -1.196443 | -0.039585 | 0.118547  |
| H 0                                      | -2.563555 | -3.929646 | 0.435718  | N 0  | 0.000001  | 0.678548  | 0.185298  |
| H 0                                      | -5.598105 | -0.158111 | -0.794752 | C 0  | -2.701817 | -1.826901 | 0.040087  |
| H 0                                      | 2.563555  | -3.929646 | 0.435717  | C 0  | -3.585738 | -0.737913 | -0.145995 |
| H 0                                      | 4.983838  | -4.316772 | 0.118983  | S 0  | -2.724741 | 0.798533  | -0.157713 |
| H 0                                      | 6.494266  | -2.449677 | -0.488273 | C 0  | -3.231795 | -3.128575 | 0.064712  |
| H 0                                      | 5.598104  | -0.158111 | -0.794752 | C 0  | -4.599307 | -3.312869 | -0.094503 |
| H 0                                      | -0.000001 | 4.855921  | -2.092641 | C 0  | -5.459423 | -2.218917 | -0.274825 |
| H 0                                      | 0.000000  | 6.005330  | 0.092151  | C 0  | -4.958069 | -0.920025 | -0.300760 |
| H 0                                      | 0.000001  | 4.686468  | 2.199600  | C 0  | -0.000014 | 2.107632  | 0.299848  |
| H 0                                      | -0.000001 | 1.130444  | -2.559642 | C 0  | 0.000032  | 2.701352  | 1.576263  |
| H 0                                      | -0.880894 | 2.525235  | -3.192375 | C 0  | 0.000023  | 4.095851  | 1.659109  |
| H 0                                      | 0.880891  | 2.525235  | -3.192376 | C 0  | -0.000029 | 4.885725  | 0.512223  |
| SCF Done: E(RB3LYP) = -                  |           |           |           | C 0  | -0.000079 | 4.301669  | -0.750394 |
| 2594.73117397                            |           |           |           | C 0  | -0.000073 | 2.914567  | -0.847433 |
| Sum of electronic and zero-point         |           |           |           | Cl 0 | -0.000167 | 2.179503  | -2.442044 |
| Energies= -2594.429700                   |           |           |           | C 0  | 0.000130  | 1.849043  | 2.819134  |
| Sum of electronic and thermal Energies=  |           |           |           | H 0  | 6.523657  | -2.382911 | -0.396518 |
| -2594.406290                             |           |           |           | H 0  | 5.008214  | -4.316543 | -0.078507 |
| Sum of electronic and thermal            |           |           |           | H 0  | 2.576852  | -3.981442 | 0.202381  |
| Enthalpies= -2594.405346                 |           |           |           | H 0  | 5.620086  | -0.073583 | -0.441550 |
| Sum of electronic and thermal Free       |           |           |           | H 0  | -2.576783 | -3.981482 | 0.202428  |
| Energies= -2594.484798                   |           |           |           | H 0  | -5.008144 | -4.316616 | -0.078420 |
| Conformer II:                            |           |           |           | H 0  | -6.523618 | -2.383004 | -0.396419 |
| #p opt freq=noraman rb3lyp/6-311++g(d,p) |           |           |           | H 0  | -5.620075 | -0.073665 | -0.441479 |
| scrf=(iefpcm,solvent=dichloro            |           |           |           | H 0  | 0.000058  | 4.566003  | 2.635710  |
| methane) pop=full                        |           |           |           | H 0  | -0.000032 | 5.966010  | 0.598462  |
| 0 1                                      |           |           |           | H 0  | -0.000126 | 4.906759  | -1.647288 |
| C 0                                      | 5.459462  | -2.218838 | -0.274909 | H 0  | -0.879344 | 1.200593  | 2.856451  |
| C 0                                      | 4.599363  | -3.312802 | -0.094578 | H 0  | 0.879895  | 1.200990  | 2.856563  |
| C 0                                      | 3.231851  | -3.128526 | 0.064659  |      |           |           |           |
| C 0                                      | 2.701856  | -1.826858 | 0.040047  |      |           |           |           |

H O -0.000062 2.475873 3.711119  
 SCF Done: E(RB3LYP) = -  
 2594.73163155  
 Sum of electronic and zero-point  
 Energies= -2594.430253

Sum of electronic and thermal Energies=  
 -2594.406833  
 Sum of electronic and thermal  
 Enthalpies= -2594.405889  
 Sum of electronic and thermal Free  
 Energies= -2594.485178

### 6.1.13.3 Minimum geometry of native BBTT under SMD variation of PCM (B3LYP/6-311++G\*\*,

#### SMD CH<sub>2</sub>Cl<sub>2</sub>)

Conformer I:  
 #p opt=verytight int=ultrafine  
 freq=norman rb3lyp/6-311++g(d,p) scrf=  
 (smd,solvent=dichloromethane) pop=full  
 geom=checkpoint guess=read

0 1  
 C O -5.432025 -2.269958 -0.366546  
 C O -4.576444 -3.321439 -0.003590  
 C O -3.216927 -3.105649 0.182968  
 C O -2.690842 -1.814950 0.000443  
 C O -3.570078 -0.769894 -0.368904  
 C O -4.934971 -0.982317 -0.550619  
 C O -1.339324 -1.347082 0.158396  
 C O -1.195032 -0.017080 -0.097547  
 S O -2.714634 0.760204 -0.554522  
 S O -0.000000 -2.397562 0.708440  
 C O 1.339323 -1.347082 0.158396  
 C O 1.195032 -0.017080 -0.097547  
 N O -0.000000 0.705568 -0.098010  
 C O 2.690842 -1.814950 0.000443  
 C O 3.570078 -0.769895 -0.368904  
 S O 2.714634 0.760204 -0.554522  
 C O 3.216926 -3.105649 0.182968  
 C O 4.576443 -3.321440 -0.003590  
 C O 5.432025 -2.269959 -0.366546  
 C O 4.934971 -0.982318 -0.550619  
 C O 0.000000 2.140207 -0.062678  
 C O 0.000000 2.886802 -1.254631  
 C O 0.000000 4.285254 -1.158633  
 C O 0.000001 4.925954 0.072989

C O 0.000001 4.188573 1.256859  
 C O 0.000000 2.804567 1.176981  
 Cl O 0.000000 1.867578 2.664432  
 C O -0.000000 2.238121 -2.616287  
 H O -6.490224 -2.458708 -0.506254  
 H O -4.982713 -4.317178 0.134033  
 H O -2.566903 -3.927019 0.463674  
 H O -5.594521 -0.169080 -0.831438  
 H O 2.566903 -3.927020 0.463674  
 H O 4.982712 -4.317178 0.134033  
 H O 6.490224 -2.458709 -0.506255  
 H O 5.594521 -0.169080 -0.831438  
 H O 0.000000 4.871675 -2.071004  
 H O 0.000001 6.008978 0.121837  
 H O 0.000001 4.680696 2.220943  
 H O 0.000000 1.150574 -2.565295  
 H O -0.880859 2.551151 -3.184474  
 H O 0.880857 2.551152 -3.184474

SCF Done: E(RB3LYP) = -  
 2594.75574819  
 Sum of electronic and zero-point  
 Energies= -2594.454185  
 Sum of electronic and thermal Energies=  
 -2594.430925  
 Sum of electronic and thermal  
 Enthalpies= -2594.429981  
 Sum of electronic and thermal Free  
 Energies= -2594.508852

Conformer II:  
 #p opt freq=norman rb3lyp/6-311++g(d,p)  
 pop=full scrf=(SMD,solvent=di  
 chloromethane) geom=check guess=read



|     |           |           |           |                                         |              |           |           |
|-----|-----------|-----------|-----------|-----------------------------------------|--------------|-----------|-----------|
| 0 1 | C O       | -0.000008 | 2.953087  | -0.798440                               |              |           |           |
| C O | 5.443368  | -2.243845 | -0.326998 | Cl O                                    | 0.000013     | 2.267799  | -2.418840 |
| C O | 4.584703  | -3.328115 | -0.089367 | C O                                     | 0.000000     | 1.784642  | 2.837765  |
| C O | 3.221953  | -3.134181 | 0.097668  | H O                                     | 6.503992     | -2.415981 | -0.469599 |
| C O | 2.694995  | -1.831952 | 0.042520  | H O                                     | 4.991003     | -4.332546 | -0.050472 |
| C O | 3.577653  | -0.753424 | -0.201880 | H O                                     | 2.570479     | -3.981601 | 0.280906  |
| C O | 4.945646  | -0.944591 | -0.383572 | H O                                     | 5.606945     | -0.105966 | -0.569482 |
| C O | 1.340187  | -1.383995 | 0.225523  | H O                                     | -2.570457    | -3.981616 | 0.280912  |
| C O | 1.195884  | -0.034811 | 0.101686  | H O                                     | -4.990980    | -4.332572 | -0.050460 |
| S O | 2.720719  | 0.785539  | -0.248236 | H O                                     | -6.503979    | -2.416016 | -0.469592 |
| S O | 0.000007  | -2.488643 | 0.654345  | H O                                     | -5.606942    | -0.105997 | -0.569486 |
| C O | -1.340177 | -1.384004 | 0.225513  | H O                                     | -0.000056    | 4.499420  | 2.731720  |
| C O | -1.195881 | -0.034819 | 0.101673  | H O                                     | -0.000054    | 5.960638  | 0.735855  |
| N O | -0.000001 | 0.684784  | 0.165127  | H O                                     | -0.000022    | 4.970052  | -1.539162 |
| C O | -2.694983 | -1.831968 | 0.042513  | H O                                     | -0.879686    | 1.134956  | 2.862366  |
| C O | -3.577646 | -0.753445 | -0.201891 | H O                                     | 0.879908     | 1.135258  | 2.862535  |
| S O | -2.720720 | 0.785521  | -0.248256 | H O                                     | -0.000184    | 2.390813  | 3.744724  |
| C O | -3.221935 | -3.134200 | 0.097670  | SCF Done: E(RB3LYP) = -                 |              |           |           |
| C O | -4.584685 | -3.328139 | -0.089361 | 2594.75606243                           |              |           |           |
| C O | -5.443355 | -2.243875 | -0.326996 | Sum of electronic and zero-point        |              |           |           |
| C O | -4.945639 | -0.944619 | -0.383575 | Energies=                               | -2594.454897 |           |           |
| C O | -0.000008 | 2.111264  | 0.323938  | Sum of electronic and thermal Energies= | -2594.431428 |           |           |
| C O | -0.000019 | 2.667656  | 1.617918  | Sum of electronic and thermal           |              |           |           |
| C O | -0.000038 | 4.059605  | 1.740867  | Enthalpies=                             | -2594.430484 |           |           |
| C O | -0.000038 | 4.883045  | 0.617996  | Sum of electronic and thermal Free      |              |           |           |
| C O | -0.000023 | 4.336749  | -0.661506 | Energies=                               | -2594.510818 |           |           |

#### 6.1.13.4 Minimum geometry of radical cation of BBTT in gas phase (B3LYP/6-311++G\*\*)

#p opt freq=norman ub3lyp/6-311++g(d,p) pop=full

|     |          |           |           |           |           |           |           |
|-----|----------|-----------|-----------|-----------|-----------|-----------|-----------|
| 0 1 | C O      | 1.193777  | -0.028482 | -0.117666 |           |           |           |
| C O | 5.479831 | -2.166510 | 0.001871  | S O       | 2.721388  | 0.821131  | -0.142252 |
| C O | 4.626978 | -3.280489 | 0.043922  | S O       | 0.000041  | -2.526954 | -0.013682 |
| C O | 3.251184 | -3.122115 | 0.027514  | C O       | -1.337694 | -1.407573 | -0.058422 |
| C O | 2.712004 | -1.825147 | -0.032192 | C O       | -1.193764 | -0.028516 | -0.117647 |
| C O | 3.587517 | -0.716948 | -0.074219 | N O       | -0.000003 | 0.654360  | -0.154685 |
| C O | 4.969666 | -0.873603 | -0.057691 | C O       | -2.711942 | -1.825230 | -0.032188 |
| C O | 1.337743 | -1.407535 | -0.058372 | C O       | -3.587497 | -0.717061 | -0.074061 |
|     | S O      | -2.721403 | 0.821072  | -0.142045 |           |           |           |
|     | C O      | -3.251078 | -3.122225 | 0.027345  |           |           |           |

|      |           |           |           |                                         |           |           |           |
|------|-----------|-----------|-----------|-----------------------------------------|-----------|-----------|-----------|
| C O  | -4.626867 | -3.280648 | 0.043760  | H O                                     | -6.552948 | -2.313141 | 0.016404  |
| C O  | -5.479760 | -2.166693 | 0.001887  | H O                                     | -5.632801 | -0.017983 | -0.088335 |
| C O  | -4.969638 | -0.873761 | -0.057516 | H O                                     | -0.000442 | 4.686210  | -2.374584 |
| C O  | -0.000035 | 2.104480  | -0.197035 | H O                                     | -0.000293 | 5.952230  | -0.256096 |
| C O  | -0.000164 | 2.757396  | -1.441429 | H O                                     | -0.000002 | 4.759252  | 1.922482  |
| C O  | -0.000286 | 4.154367  | -1.430597 | H O                                     | 0.883251  | 1.350382  | -2.829528 |
| C O  | -0.000216 | 4.868883  | -0.235768 | H O                                     | -0.881833 | 1.348230  | -2.828595 |
| C O  | -0.000055 | 4.210557  | 0.989970  | H O                                     | -0.001305 | 2.674847  | -3.585414 |
| C O  | 0.000008  | 2.821161  | 1.007611  | SCF Done: E(UB3LYP) = -                 |           |           |           |
| Cl O | 0.000104  | 1.977618  | 2.536601  | 2594.50503760                           |           |           |           |
| C O  | -0.000028 | 1.988665  | -2.738940 | Sum of electronic and zero-point        |           |           |           |
| H O  | 6.553025  | -2.312919 | 0.016372  | Energies= -2594.202726                  |           |           |           |
| H O  | 5.051200  | -4.275793 | 0.090561  | Sum of electronic and thermal Energies= |           |           |           |
| H O  | 2.601995  | -3.989654 | 0.061425  | -2594.179523                            |           |           |           |
| H O  | 5.632801  | -0.017809 | -0.088655 | Sum of electronic and thermal           |           |           |           |
| H O  | -2.601859 | -3.989747 | 0.061133  | Enthalpies= -2594.178579                |           |           |           |
| H O  | -5.051053 | -4.275975 | 0.090259  | Sum of electronic and thermal Free      |           |           |           |
|      |           |           |           | Energies= -2594.256943                  |           |           |           |

### 6.1.13.5 Minimum geometry of radical cation of BBTT under SMD variation of PCM

(B3LYP/6-311++G\*\*, SMD CH<sub>2</sub>Cl<sub>2</sub>)

```
#p opt freq=noraman ub3lyp/6-
311++g(d,p) pop=full
scrf=(SMD,solvent=di
chloromethane)
0 1
```

|     |           |           |           |      |           |           |           |
|-----|-----------|-----------|-----------|------|-----------|-----------|-----------|
| C O | 5.469872  | -2.188390 | -0.023449 | C O  | -2.717137 | -1.819656 | -0.022966 |
| C O | 4.611504  | -3.298347 | 0.023517  | C O  | -3.591693 | -0.710713 | -0.060755 |
| C O | 3.235547  | -3.133915 | 0.016612  | S O  | -2.721802 | 0.826353  | -0.127480 |
| C O | 2.704091  | -1.833616 | -0.038154 | C O  | -3.255971 | -3.117085 | 0.028617  |
| C O | 3.584548  | -0.729832 | -0.087530 | C O  | -4.632835 | -3.273512 | 0.042930  |
| C O | 4.966594  | -0.892018 | -0.080153 | C O  | -5.485094 | -2.158476 | 0.006709  |
| C O | 1.331374  | -1.410436 | -0.053152 | C O  | -4.974547 | -0.864781 | -0.045946 |
| C O | 1.190796  | -0.032382 | -0.113014 | C O  | 0.003796  | 2.102196  | -0.196480 |
| S O | 2.722762  | 0.811928  | -0.156579 | C O  | -0.020256 | 2.751990  | -1.440543 |
| S O | -0.007947 | -2.526216 | -0.000579 | C O  | -0.006266 | 4.152548  | -1.430993 |
| C O | -1.342139 | -1.403994 | -0.046652 | C O  | 0.024790  | 4.869542  | -0.241968 |
| C O | -1.194401 | -0.026515 | -0.104339 | C O  | 0.044904  | 4.214253  | 0.988809  |
| N O | -0.000481 | 0.653476  | -0.138592 | C O  | 0.034472  | 2.828850  | 1.005387  |
|     |           |           |           | Cl O | 0.058363  | 1.985736  | 2.543208  |
|     |           |           |           | C O  | -0.079388 | 2.010543  | -2.751388 |
|     |           |           |           | H O  | 6.542712  | -2.340210 | -0.015717 |
|     |           |           |           | H O  | 5.030644  | -4.296375 | 0.066372  |
|     |           |           |           | H O  | 2.582610  | -3.998743 | 0.053109  |

H O 5.634620 -0.039757 -0.115669  
H O -2.608190 -3.986078 0.056334  
H O -5.057453 -4.269350 0.082676  
H O -6.558728 -2.304149 0.019505  
H O -5.637592 -0.008338 -0.073270  
H O -0.021209 4.679189 -2.378488  
H O 0.034553 5.953143 -0.264451  
H O 0.068734 4.768804 1.917858  
H O 0.102121 0.940653 -2.651670  
H O -1.064089 2.140906 -3.211449

H O 0.658883 2.417887 -3.445928

SCF Done: E(UB3LYP) = -  
2594.58278791

Sum of electronic and zero-point  
Energies= -2594.280473

Sum of electronic and thermal Energies=  
-2594.257395

Sum of electronic and thermal  
Enthalpies= -2594.256451

Sum of electronic and thermal Free  
Energies= -2594.334399

### 6.1.14 *anti-anti-N-ortho,ortho'*-chloromethoxyphenyl-BBTT 3q

#### 6.1.14.1 Minimum geometry of native BBTT in gas phase (B3LYP/6-311++G\*\*)

Conformer I:

#p opt=verytight freq=noraman rb3lyp/6-  
311++g(d,p) pop=full

0 1

C O -5.400954 -2.391736 -0.403824  
C O -4.546656 -3.399097 0.068786  
C O -3.195532 -3.152131 0.267728  
C O -2.676690 -1.877576 -0.011441  
C O -3.551433 -0.876829 -0.495290  
C O -4.909601 -1.121896 -0.688518  
C O -1.335252 -1.382203 0.148708  
C O -1.193795 -0.080439 -0.219023  
S O -2.700907 0.630346 -0.809884  
S O 0.000000 -2.361608 0.812117  
C O 1.335252 -1.382203 0.148708  
C O 1.193795 -0.080439 -0.219023  
N O -0.000000 0.653333 -0.258221  
C O 2.676690 -1.877576 -0.011442  
C O 3.551433 -0.876829 -0.495290  
S O 2.700907 0.630346 -0.809885  
C O 3.195532 -3.152130 0.267729  
C O 4.546656 -3.399096 0.068786  
C O 5.400954 -2.391735 -0.403823  
C O 4.909600 -1.121896 -0.688518  
C O -0.000000 2.033698 0.120419

C O -0.000000 3.058511 -0.827625  
C O -0.000001 4.400392 -0.449639  
C O -0.000001 4.713373 0.902932  
C O -0.000001 3.717834 1.878486  
C O 0.000000 2.376139 1.492523  
O O 0.000001 1.328352 2.345417  
C O 0.000001 1.577156 3.748876  
Cl O 0.000000 2.664733 -2.534104  
H O -6.453429 -2.603099 -0.552925  
H O -4.947628 -4.383684 0.280535  
H O -2.540114 -3.936511 0.629052  
H O -5.567776 -0.344095 -1.058155  
H O 2.540114 -3.936511 0.629052  
H O 4.947628 -4.383684 0.280536  
H O 6.453429 -2.603098 -0.552925  
H O 5.567776 -0.344095 -1.058155  
H O -0.000001 5.173091 -1.206093  
H O -0.000001 5.753597 1.207762  
H O -0.000001 3.991468 2.924367  
H O 0.000002 0.595600 4.217929  
H O 0.896028 2.127662 4.052041  
H O -0.896026 2.127660 4.052042

SCF Done: E(RB3LYP) = -  
2669.95097796

Sum of electronic and zero-point  
Energies= -2669.644375

Sum of electronic and thermal Energies=  
-2669.620166

Sum of electronic and thermal  
Enthalpies= -2669.619222

Sum of electronic and thermal Free  
Energies= -2669.700168

Conformer II:

#p opt freq=noraman rb3lyp/6-311++g(d,p)  
pop=full

0 1

C 0 -5.419824 -2.337282 0.426392  
C 0 -4.563264 -3.421495 0.186115  
C 0 -3.207492 -3.224970 -0.037944  
C 0 -2.684205 -1.921539 -0.018554  
C 0 -3.563344 -0.842155 0.231734  
C 0 -4.924725 -1.036852 0.449992  
C 0 -1.335553 -1.475207 -0.239561  
C 0 -1.195315 -0.125078 -0.136170  
S 0 -2.710637 0.698310 0.233666  
S 0 0.000087 -2.572467 -0.690954  
C 0 1.335639 -1.475139 -0.239551  
C 0 1.195334 -0.125015 -0.136132  
N 0 -0.000007 0.593374 -0.252448  
C 0 2.684324 -1.921393 -0.018557  
C 0 3.563409 -0.841959 0.231678  
S 0 2.710639 0.698440 0.233629  
C 0 3.207725 -3.224788 -0.038068  
C 0 4.563522 -3.421205 0.185833  
C 0 5.420039 -2.336944 0.426038  
C 0 4.924850 -1.036569 0.449759  
C 0 -0.000061 2.017669 -0.214049  
C 0 -0.000261 2.776073 -1.388702

C 0 -0.000332 4.168351 -1.354808  
C 0 -0.000193 4.806007 -0.120514  
C 0 -0.000010 4.084287 1.070843  
C 0 0.000029 2.687630 1.032178  
O 0 0.000129 1.887769 2.120613  
C 0 0.000257 2.480361 3.417060  
Cl 0 -0.000401 1.964262 -2.935218  
H 0 -6.476018 -2.510563 0.596344  
H 0 -4.966430 -4.427687 0.173584  
H 0 -2.552137 -4.068942 -0.220803  
H 0 -5.584227 -0.197222 0.637216  
H 0 2.552426 -4.068826 -0.220838  
H 0 4.966736 -4.427378 0.173212  
H 0 6.476240 -2.510160 0.595866  
H 0 5.584299 -0.196903 0.636982  
H 0 -0.000479 4.730380 -2.278642  
H 0 -0.000228 5.889321 -0.082562  
H 0 0.000068 4.609087 2.015889  
H 0 0.000380 1.647776 4.117255  
H 0 0.896375 3.088856 3.572863  
H 0 -0.895883 3.088773 3.573067

SCF Done: E(RB3LYP) = -  
2669.95084561

Sum of electronic and zero-point  
Energies= -2669.644182

Sum of electronic and thermal Energies=  
-2669.619944

Sum of electronic and thermal  
Enthalpies= -2669.619000

Sum of electronic and thermal Free  
Energies= -2669.700111

#### 6.1.14.2 Minimum geometry of native BBTT under IEFPCM variation of PCM

(B3LYP/6-311++G\*\*, IEFPCM CH<sub>2</sub>Cl<sub>2</sub>)

Conformer I:

#p opt=verytight freq=noraman rb3lyp/6-  
311++g(d,p) pop=full Guess=Read

geom=check

SCRF=(IEFPCM,Solvent=Dichloromethan  
e)

0 1

C 0 -5.476092 -2.309523 -0.185310

C O -4.614558 -3.390031 0.057497  
 C O -3.242114 -3.201009 0.159208  
 C O -2.709009 -1.908692 0.013130  
 C O -3.594340 -0.833495 -0.235812  
 C O -4.971363 -1.020068 -0.333054  
 C O -1.341922 -1.470141 0.099533  
 C O -1.196236 -0.129918 -0.092718  
 S O -2.728406 0.691899 -0.393963  
 S O -0.000000 -2.588671 0.482336  
 C O 1.341922 -1.470141 0.099533  
 C O 1.196236 -0.129918 -0.092718  
 N O 0.000000 0.590443 -0.130446  
 C O 2.709009 -1.908692 0.013130  
 C O 3.594340 -0.833495 -0.235812  
 S O 2.728406 0.691899 -0.393963  
 C O 3.242114 -3.201009 0.159208  
 C O 4.614558 -3.390031 0.057497  
 C O 5.476092 -2.309523 -0.185310  
 C O 4.971363 -1.020068 -0.333054  
 C O 0.000000 2.011739 0.000705  
 C O 0.000000 2.851182 -1.117954  
 C O 0.000000 4.236790 -0.988575  
 C O 0.000000 4.784743 0.289625  
 C O 0.000000 3.981357 1.427521  
 C O 0.000000 2.590751 1.291284  
 O O 0.000000 1.716172 2.319328  
 C O 0.000000 2.223148 3.660348  
 Cl O 0.000000 2.148595 -2.725264  
 H O -6.544104 -2.476713 -0.260620  
 H O -5.025914 -4.386802 0.167832  
 H O -2.586446 -4.043912 0.346580  
 H O -5.634941 -0.184463 -0.522417  
 H O 2.586446 -4.043912 0.346580  
 H O 5.025914 -4.386802 0.167832  
 H O 6.544104 -2.476714 -0.260620  
 H O 5.634941 -0.184463 -0.522417  
 H O 0.000000 4.865192 -1.868557

H O 0.000000 5.862377 0.403776  
 H O 0.000000 4.439041 2.406517  
 H O 0.000000 1.345001 4.301610  
 H O 0.895942 2.818900 3.851970  
 H O -0.895942 2.818900 3.851970

SCF Done: E(RB3LYP) = -2669.96079300

Sum of electronic and zero-point Energies= -2669.654211

Sum of electronic and thermal Energies= -2669.629967

Sum of electronic and thermal Enthalpies= -2669.629023

Sum of electronic and thermal Free Energies= -2669.710431

Conformer II:

#p opt freq=noraman rb3lyp/6-311++g(d,p)  
pop=full Guess=Read geom=chec

k  
SCRF=(IEFPCM,Solvent=Dichloromethane)

0 1

C O -5.437192 -2.320099 0.396839  
 C O -4.581328 -3.411718 0.184730  
 C O -3.220457 -3.223987 -0.021150  
 C O -2.692492 -1.921382 -0.011667  
 C O -3.571937 -0.834644 0.207159  
 C O -4.937760 -1.020228 0.408611  
 C O -1.338113 -1.482213 -0.213950  
 C O -1.194792 -0.130062 -0.131036  
 S O -2.713909 0.703908 0.195885  
 S O -0.000075 -2.597896 -0.618018  
 C O 1.338020 -1.482271 -0.213982  
 C O 1.194762 -0.130114 -0.131072  
 N O -0.000000 0.587261 -0.241380  
 C O 2.692386 -1.921499 -0.011727  
 C O 3.571883 -0.834795 0.207066  
 S O 2.713914 0.703791 0.195845  
 C O 3.220287 -3.224129 -0.021219  
 C O 4.581162 -3.411919 0.184605

|      |           |           |           |     |           |           |           |
|------|-----------|-----------|-----------|-----|-----------|-----------|-----------|
| C O  | 5.437074  | -2.320332 | 0.396682  | H O | 6.496243  | -2.487011 | 0.553700  |
| C O  | 4.937701  | -1.020437 | 0.408472  | H O | 5.596374  | -0.175889 | 0.573764  |
| C O  | 0.000038  | 2.013671  | -0.203227 | H O | 0.000006  | 4.722818  | -2.276667 |
| C O  | 0.000003  | 2.769828  | -1.379822 | H O | 0.000163  | 5.883815  | -0.082917 |
| C O  | 0.000041  | 4.160344  | -1.353148 | H O | 0.000259  | 4.611301  | 2.017629  |
| C O  | 0.000126  | 4.800731  | -0.118059 | H O | 0.000384  | 1.668105  | 4.137714  |
| C O  | 0.000176  | 4.082929  | 1.074873  | H O | 0.896221  | 3.104357  | 3.580004  |
| C O  | 0.000131  | 2.685281  | 1.042305  | H O | -0.895498 | 3.104390  | 3.580164  |
| O O  | 0.000211  | 1.890823  | 2.133590  |     |           |           |           |
| C O  | 0.000337  | 2.495992  | 3.432764  |     |           |           |           |
| Cl O | -0.000110 | 1.947356  | -2.927427 |     |           |           |           |
| H O  | -6.496361 | -2.486736 | 0.553894  |     |           |           |           |
| H O  | -4.988391 | -4.416335 | 0.179992  |     |           |           |           |
| H O  | -2.568383 | -4.074752 | -0.183733 |     |           |           |           |
| H O  | -5.596389 | -0.175650 | 0.573923  |     |           |           |           |
| H O  | 2.568147  | -4.074840 | -0.183805 |     |           |           |           |
| H O  | 4.988193  | -4.416548 | 0.179871  |     |           |           |           |

SCF Done: E(RB3LYP) = -2669.96099766

Sum of electronic and zero-point Energies= -2669.654418

Sum of electronic and thermal Energies= -2669.630170

Sum of electronic and thermal Enthalpies= -2669.629226

Sum of electronic and thermal Free Energies= -2669.710249

#### 6.1.14.3 Minimum geometry of native BBTT under SMD variation of PCM (B3LYP/6-311++G\*\*,

##### SMD CH<sub>2</sub>Cl<sub>2</sub>)

Conformer I:

#p opt=verytight int=ultrafine  
freq=noraman rb3lyp/6-311++g(d,p) scrf=  
(smd,solvent=dichloromethane) pop=full  
geom=check guess=read

0 1

|     |           |           |           |      |           |           |           |
|-----|-----------|-----------|-----------|------|-----------|-----------|-----------|
| C O | -5.453510 | -2.339873 | -0.279257 | N O  | -0.000000 | 0.608840  | -0.171409 |
| C O | -4.593843 | -3.398386 | 0.052120  | C O  | 2.699516  | -1.903492 | 0.002703  |
| C O | -3.227647 | -3.191728 | 0.195971  | C O  | 3.582824  | -0.851120 | -0.334526 |
| C O | -2.699516 | -1.903492 | 0.002703  | S O  | 2.722959  | 0.672798  | -0.540659 |
| C O | -3.582824 | -0.851119 | -0.334526 | C O  | 3.227646  | -3.191729 | 0.195971  |
| C O | -4.954244 | -1.054669 | -0.473810 | C O  | 4.593842  | -3.398387 | 0.052120  |
| C O | -1.340492 | -1.444794 | 0.122001  | C O  | 5.453509  | -2.339875 | -0.279258 |
| C O | -1.195212 | -0.115255 | -0.132171 | C O  | 4.954243  | -1.054670 | -0.473811 |
| S O | -2.722959 | 0.672799  | -0.540659 | C O  | 0.000000  | 2.022402  | 0.045761  |
| S O | -0.000000 | -2.517608 | 0.620704  | C O  | 0.000000  | 2.931740  | -1.016566 |
| C O | 1.340491  | -1.444794 | 0.122001  | C O  | 0.000001  | 4.306408  | -0.799981 |
| C O | 1.195211  | -0.115255 | -0.132171 | C O  | 0.000001  | 4.771590  | 0.510946  |
|     |           |           |           | C O  | 0.000001  | 3.897748  | 1.595488  |
|     |           |           |           | C O  | 0.000000  | 2.518632  | 1.370638  |
|     |           |           |           | O O  | 0.000000  | 1.580538  | 2.339415  |
|     |           |           |           | C O  | 0.000001  | 2.000897  | 3.711921  |
|     |           |           |           | Cl O | 0.000000  | 2.336124  | -2.670113 |
|     |           |           |           | H O  | -6.516720 | -2.521451 | -0.386913 |

H O -5.001806 -4.392295 0.197729  
H O -2.574650 -4.019177 0.450809  
H O -5.617243 -0.236609 -0.731562  
H O 2.574648 -4.019178 0.450809  
H O 5.001805 -4.392296 0.197728  
H O 6.516719 -2.521453 -0.386913  
H O 5.617243 -0.236611 -0.731563  
H O 0.000001 4.991143 -1.637552  
H O 0.000001 5.840146 0.693434  
H O 0.000001 4.290246 2.602707  
H O 0.000001 1.081782 4.294994  
H O 0.896867 2.581481 3.943484  
H O -0.896864 2.581482 3.943485

SCF Done: E(RB3LYP) = -  
2669.98460158

Sum of electronic and zero-point  
Energies= -2669.678382

Sum of electronic and thermal Energies=  
-2669.653980

Sum of electronic and thermal  
Enthalpies= -2669.653036

Sum of electronic and thermal Free  
Energies= -2669.736608

Conformer II:

#p opt freq=noraman rb3lyp/6-311++g(d,p)  
scrf=(smd,solvent=dichloromet

hane) pop=full geom=check guess=read

0 1

C O -5.456138 -2.308068 0.351270  
C O -4.598138 -3.403989 0.172811  
C O -3.231954 -3.222699 -0.002181  
C O -2.700492 -1.921110 0.005463  
C O -3.583011 -0.830328 0.188994  
C O -4.953800 -1.009121 0.360049  
C O -1.340447 -1.486924 -0.169542  
C O -1.195057 -0.134183 -0.102878  
S O -2.720308 0.706812 0.177474  
S O 0.000031 -2.617017 -0.525448  
C O 1.340490 -1.486894 -0.169570

C O 1.195072 -0.134157 -0.102904  
N O -0.000002 0.582519 -0.204812  
C O 2.700544 -1.921057 0.005455  
C O 3.583042 -0.830255 0.188970  
S O 2.720319 0.706873 0.177376  
C O 3.232005 -3.222642 -0.002156  
C O 4.598192 -3.403938 0.172837  
C O 5.456163 -2.307990 0.351290  
C O 4.953825 -1.009041 0.360051  
C O -0.000022 2.009749 -0.195537  
C O -0.000047 2.742637 -1.387468  
C O -0.000070 4.132641 -1.390842  
C O -0.000071 4.797267 -0.167892  
C O -0.000051 4.104727 1.039583  
C O -0.000024 2.705980 1.037031  
O O -0.000012 1.934375 2.142880  
C O 0.000007 2.565265 3.432185  
Cl O -0.000041 1.886469 -2.919760  
H O -6.519600 -2.470355 0.483955  
H O -5.007811 -4.407828 0.169078  
H O -2.581500 -4.079397 -0.140372  
H O -5.614800 -0.161131 0.498602  
H O 2.581514 -4.079310 -0.140349  
H O 5.007941 -4.407745 0.169149  
H O 6.519627 -2.470259 0.483994  
H O 5.614832 -0.161056 0.498594  
H O -0.000086 4.678055 -2.325099  
H O -0.000092 5.881343 -0.154935  
H O -0.000058 4.653270 1.971119  
H O 0.000017 1.750057 4.153396  
H O 0.896829 3.174912 3.569426  
H O -0.896809 3.174912 3.569455

SCF Done: E(RB3LYP) = -  
2669.98482238

Sum of electronic and zero-point  
Energies= -2669.678426

Sum of electronic and thermal Energies=  
-2669.654130

Sum of electronic and thermal  
Enthalpies= -2669.653186

Sum of electronic and thermal Free  
Energies= -2669.734831

#### 6.1.14.4 Minimum geometry of radical cation of BBTT in gas phase (B3LYP/6-311++G\*\*)

#p opt freq=noraman ub3lyp/6-  
311++g(d,p) pop=full

0 1  
C 0 5.480406 -2.259977 0.057158  
C 0 4.628222 -3.374338 0.100225  
C 0 3.252232 -3.216344 0.088953  
C 0 2.712122 -1.919691 0.033888  
C 0 3.586830 -0.810856 -0.008470  
C 0 4.969130 -0.967317 0.002456  
C 0 1.337492 -1.502485 0.013512  
C 0 1.193450 -0.123711 -0.042986  
S 0 2.719256 0.726231 -0.073641  
S 0 -0.000060 -2.621449 0.052882  
C 0 -1.337573 -1.502424 0.013672  
C 0 -1.193453 -0.123674 -0.042962  
N 0 0.000003 0.558447 -0.080373  
C 0 -2.712227 -1.919585 0.033811  
C 0 -3.586901 -0.810751 -0.009142  
S 0 -2.719262 0.726337 -0.074626  
C 0 -3.252373 -3.216205 0.089253  
C 0 -4.628371 -3.374168 0.100249  
C 0 -5.480520 -2.259810 0.056500  
C 0 -4.969204 -0.967178 0.001449  
C 0 0.000012 2.000501 -0.104178  
C 0 0.000551 2.700876 -1.314569  
C 0 0.000678 4.090903 -1.321225  
C 0 0.000242 4.766322 -0.104487

C 0 -0.000281 4.089193 1.112469  
C 0 -0.000362 2.692417 1.125956  
O 0 -0.000613 1.918042 2.228841  
C 0 -0.001156 2.544721 3.520766  
Cl 0 0.000934 1.824298 -2.822044  
H 0 6.553736 -2.405940 0.065789  
H 0 5.052939 -4.369670 0.141974  
H 0 2.603448 -4.084243 0.121889  
H 0 5.631703 -0.111181 -0.031703  
H 0 -2.603613 -4.084101 0.122719  
H 0 -5.053116 -4.369471 0.142380  
H 0 -6.553855 -2.405750 0.064874  
H 0 -5.631751 -0.111046 -0.033300  
H 0 0.001120 4.625898 -2.260946  
H 0 0.000327 5.849880 -0.103529  
H 0 -0.000659 4.647346 2.038012  
H 0 -0.001626 1.727736 4.237966  
H 0 0.895845 3.153683 3.656881  
H 0 -0.898124 3.153925 3.655993

SCF Done: E(UB3LYP) = -  
2669.73616547

Sum of electronic and zero-point  
Energies= -2669.428658

Sum of electronic and thermal Energies=  
-2669.404595

Sum of electronic and thermal  
Enthalpies= -2669.403651

Sum of electronic and thermal Free  
Energies= -2669.483931

#### 6.1.14.5 Minimum geometry of radical cation of BBTT under SMD variation of PCM

(B3LYP/6-311++G\*\*, SMD CH<sub>2</sub>Cl<sub>2</sub>)

#p opt freq=noraman ub3lyp/6-  
311++g(d,p) pop=full  
scrf=(SMD,solvent=di

chloromethane)

0 1

C 0 5.478855 -2.263178 0.071311  
C 0 4.624928 -3.377095 0.098723  
C 0 3.248252 -3.218392 0.082432  
C 0 2.711443 -1.920000 0.037735



|     |           |           |           |      |                                         |              |           |
|-----|-----------|-----------|-----------|------|-----------------------------------------|--------------|-----------|
| C 0 | 3.587622  | -0.812026 | 0.008562  | Cl 0 | 0.000249                                | 1.791395     | -2.832340 |
| C 0 | 4.970169  | -0.968412 | 0.026047  | H 0  | 6.552268                                | -2.410508    | 0.084754  |
| C 0 | 1.336903  | -1.501991 | 0.014560  | H 0  | 5.047938                                | -4.373851    | 0.132457  |
| C 0 | 1.192334  | -0.124249 | -0.034523 | H 0  | 2.599040                                | -4.086528    | 0.102879  |
| S 0 | 2.719666  | 0.726837  | -0.049661 | H 0  | 5.634584                                | -0.112846    | 0.004593  |
| S 0 | 0.000076  | -2.621446 | 0.038992  | H 0  | -2.598789                               | -4.086651    | 0.102816  |
| C 0 | -1.336799 | -1.502055 | 0.014511  | H 0  | -5.047680                               | -4.374114    | 0.132256  |
| C 0 | -1.192300 | -0.124303 | -0.034579 | H 0  | -6.552113                               | -2.410855    | 0.084433  |
| N 0 | 0.000002  | 0.558377  | -0.074692 | H 0  | -5.634558                               | -0.113145    | 0.004284  |
| C 0 | -2.711316 | -1.920133 | 0.037609  | H 0  | 0.000138                                | 4.605825     | -2.300204 |
| C 0 | -3.587553 | -0.812208 | 0.008361  | H 0  | -0.000160                               | 5.850074     | -0.156285 |
| S 0 | -2.719666 | 0.726701  | -0.049829 | H 0  | -0.000373                               | 4.672964     | 1.997893  |
| C 0 | -3.248053 | -3.218555 | 0.082306  | H 0  | -0.000703                               | 1.784032     | 4.235627  |
| C 0 | -4.624721 | -3.377336 | 0.098524  | H 0  | 0.896802                                | 3.202902     | 3.635143  |
| C 0 | -5.478708 | -2.263466 | 0.071045  | H 0  | -0.898414                               | 3.202609     | 3.634730  |
| C 0 | -4.970093 | -0.968671 | 0.025783  |      |                                         |              |           |
| C 0 | -0.000033 | 2.000188  | -0.112452 |      | SCF Done: E(UB3LYP) = -                 |              |           |
| C 0 | 0.000081  | 2.690103  | -1.329264 |      | 2669.81282837                           |              |           |
| C 0 | 0.000042  | 4.077773  | -1.356205 |      | Sum of electronic and zero-point        |              |           |
| C 0 | -0.000125 | 4.766241  | -0.144878 |      | Energies=                               | -2669.505319 |           |
| C 0 | -0.000251 | 4.104007  | 1.078779  |      | Sum of electronic and thermal Energies= |              |           |
| C 0 | -0.000199 | 2.706226  | 1.110182  |      | -2669.481304                            |              |           |
| O 0 | -0.000284 | 1.947423  | 2.220860  |      | Sum of electronic and thermal           |              |           |
| C 0 | -0.000676 | 2.593345  | 3.508485  |      | Enthalpies=                             | -2669.480360 |           |
|     |           |           |           |      | Sum of electronic and thermal Free      |              |           |
|     |           |           |           |      | Energies=                               | -2669.560759 |           |

### 6.1.15 anti-anti-N-ortho,ortho'-difluorophenyl-BBTT 3h

#### 6.1.15.1 Minimum geometry of native BBTT in gas phase (B3LYP/6-311++G\*\*)

#

|                                         |           |           |           |           |          |           |           |
|-----------------------------------------|-----------|-----------|-----------|-----------|----------|-----------|-----------|
| p opt freq=noraman rb3lyp/6-311++g(d,p) | C 0       | -1.195215 | 0.083277  | -0.147127 |          |           |           |
| pop=full                                | S 0       | -2.674259 | 0.728932  | -0.869170 |          |           |           |
| 0 1                                     | S 0       | -0.000017 | -2.102305 | 1.050267  |          |           |           |
| C 0                                     | -5.346438 | -2.312898 | -0.427911 | C 0       | 1.334323 | -1.197714 | 0.285805  |
| C 0                                     | -4.504607 | -3.275908 | 0.148406  | C 0       | 1.195199 | 0.083249  | -0.147163 |
| C 0                                     | -3.170727 | -2.993242 | 0.405726  | N 0       | 0.000001 | 0.818837  | -0.164591 |
| C 0                                     | -2.657295 | -1.727812 | 0.081107  | C 0       | 2.657258 | -1.727856 | 0.081075  |
| C 0                                     | -3.518214 | -0.772819 | -0.508497 | C 0       | 3.518188 | -0.772871 | -0.508525 |
| C 0                                     | -4.860291 | -1.052932 | -0.759542 | S 0       | 2.674231 | 0.728861  | -0.869271 |
| C 0                                     | -1.334356 | -1.197683 | 0.285844  | C 0       | 3.170683 | -2.993282 | 0.405720  |

|     |           |           |           |                                         |          |           |           |
|-----|-----------|-----------|-----------|-----------------------------------------|----------|-----------|-----------|
| C O | 4.504567  | -3.275953 | 0.148427  | H O                                     | 2.524235 | -3.741977 | 0.849289  |
| C O | 5.346409  | -2.312951 | -0.427887 | H O                                     | 4.902180 | -4.253371 | 0.396186  |
| C O | 4.860271  | -1.052988 | -0.759538 | H O                                     | 6.385830 | -2.551718 | -0.620655 |
| C O | 0.000023  | 2.204253  | 0.173021  | H O                                     | 5.509095 | -0.310137 | -1.208770 |
| C O | 0.000011  | 3.199493  | -0.807990 | H O                                     | 0.000025 | 5.278118  | -1.302833 |
| C O | 0.000035  | 4.551562  | -0.500862 | H O                                     | 0.000090 | 5.983385  | 1.094991  |
| C O | 0.000072  | 4.930953  | 0.838526  | H O                                     | 0.000111 | 4.253636  | 2.900523  |
| C O | 0.000084  | 3.977024  | 1.854170  | SCF Done: E(RB3LYP) = -                 |          |           |           |
| C O | 0.000061  | 2.637423  | 1.503547  | 2294.30564770                           |          |           |           |
| F O | 0.000069  | 1.706011  | 2.471352  | Sum of electronic and zero-point        |          |           |           |
| F O | -0.000025 | 2.824816  | -2.100220 | Energies= -2294.038015                  |          |           |           |
| H O | -6.385857 | -2.551659 | -0.620694 | Sum of electronic and thermal Energies= |          |           |           |
| H O | -4.902226 | -4.253328 | 0.396146  | -2294.015982                            |          |           |           |
| H O | -2.524286 | -3.741946 | 0.849291  | Sum of electronic and thermal           |          |           |           |
| H O | -5.509109 | -0.310071 | -1.208765 | Enthalpies= -2294.015037                |          |           |           |
|     |           |           |           | Sum of electronic and thermal Free      |          |           |           |
|     |           |           |           | Energies= -2294.091373                  |          |           |           |

#### 6.1.15.2 Minimum geometry of native BBT under IEFPCM variation of PCM

(B3LYP/6-311++G\*\*, IEFPCM CH<sub>2</sub>Cl<sub>2</sub>)

```
#p opt freq=noraman rb3lyp/6-311++g(d,p)
pop=full SCRF=(IEFPCM,Solvent
=Dichloromethane)
0 1
```

|     |           |           |           |     |           |           |           |
|-----|-----------|-----------|-----------|-----|-----------|-----------|-----------|
| C O | -5.363964 | -2.290747 | -0.434849 | C O | 3.178758  | -3.028017 | 0.327798  |
| C O | -4.518252 | -3.289670 | 0.071999  | C O | 4.518250  | -3.289675 | 0.072122  |
| C O | -3.178774 | -3.028003 | 0.327746  | C O | 5.363979  | -2.290751 | -0.434697 |
| C O | -2.663752 | -1.746958 | 0.069930  | C O | 4.876868  | -1.013796 | -0.697492 |
| C O | -3.529756 | -0.755585 | -0.448798 | C O | 0.000010  | 2.204574  | 0.169051  |
| C O | -4.876851 | -1.013785 | -0.697604 | C O | 0.000105  | 3.129031  | -0.879030 |
| C O | -1.335587 | -1.234787 | 0.285575  | C O | 0.000114  | 4.498128  | -0.668330 |
| C O | -1.196433 | 0.069642  | -0.073783 | C O | 0.000013  | 4.968979  | 0.642503  |
| S O | -2.685373 | 0.766226  | -0.723163 | C O | -0.000089 | 4.088678  | 1.723589  |
| S O | -0.000010 | -2.186587 | 0.994338  | C O | -0.000082 | 2.729543  | 1.465523  |
| C O | 1.335564  | -1.234810 | 0.285535  | F O | -0.000182 | 1.860657  | 2.495968  |
| C O | 1.196426  | 0.069621  | -0.073822 | F O | 0.000194  | 2.658344  | -2.143673 |
| N O | 0.000002  | 0.799059  | -0.065272 | H O | -6.406995 | -2.513431 | -0.626782 |
| C O | 2.663735  | -1.746982 | 0.069933  | H O | -4.916860 | -4.278390 | 0.267703  |
| C O | 3.529756  | -0.755608 | -0.448763 | H O | -2.532244 | -3.804710 | 0.720182  |
| S O | 2.685357  | 0.766170  | -0.723258 | H O | -5.528543 | -0.242903 | -1.091555 |
|     |           |           |           | H O | 2.532218  | -3.804722 | 0.720223  |
|     |           |           |           | H O | 4.916859  | -4.278388 | 0.267861  |
|     |           |           |           | H O | 6.407019  | -2.513431 | -0.626586 |

H O 5.528568 -0.242918 -1.091438  
H O 0.000191 5.170064 -1.516524  
H O 0.000014 6.036336 0.824864  
H O -0.000167 4.441003 2.746782  
SCF Done: E(RB3LYP) = -  
2294.31412733

Sum of electronic and zero-point  
Energies= -2294.046735  
Sum of electronic and thermal Energies=  
-2294.024627  
Sum of electronic and thermal  
Enthalpies= -2294.023682  
Sum of electronic and thermal Free  
Energies= -2294.100790

### 6.1.15.3 Minimum geometry of native BBT under IEFPCM variation of PCM

(PBE1PBE/6-311++G\*\*, IEFPCM CH<sub>2</sub>Cl<sub>2</sub>)

#p opt freq=norman PBE1PBE/6-  
311++g(d,p) scrf=(iefpcm,solvent=dichlor  
omethane) pop=full geom=check  
guess=read

0 1

C O -5.369631 -2.193768 -0.454060  
C O -4.527133 -3.263278 -0.127468  
C O -3.182497 -3.058257 0.132596  
C O -2.658994 -1.760560 0.061020  
C O -3.522584 -0.696801 -0.274213  
C O -4.874443 -0.899394 -0.529180  
C O -1.323053 -1.302165 0.305627  
C O -1.188554 0.039739 0.136786  
S O -2.675252 0.830805 -0.327290  
S O -0.000003 -2.348979 0.848255  
C O 1.323043 -1.302173 0.305601  
C O 1.188548 0.039732 0.136761  
N O 0.000001 0.758300 0.242041  
C O 2.658986 -1.760569 0.061004  
C O 3.522579 -0.696810 -0.274220  
S O 2.675237 0.830788 -0.327363  
C O 3.182490 -3.058264 0.132602  
C O 4.527132 -3.263284 -0.127436  
C O 5.369634 -2.193774 -0.454020  
C O 4.874444 -0.899401 -0.529156  
C O 0.000005 2.170141 0.165396  
C O 0.000004 2.841626 -1.058819

C O 0.000009 4.219964 -1.147324  
C O 0.000013 4.958111 0.030024  
C O 0.000013 4.335793 1.272925  
C O 0.000010 2.955477 1.318468  
F O 0.000010 2.334837 2.499242  
F O 0.000003 2.108486 -2.175380  
H O -6.420312 -2.375439 -0.652808  
H O -4.934370 -4.267555 -0.076174  
H O -2.535542 -3.892464 0.385027  
H O -5.524492 -0.069544 -0.784698  
H O 2.535533 -3.892470 0.385031  
H O 4.934371 -4.267559 -0.076126  
H O 6.420318 -2.375444 -0.652753  
H O 5.524494 -0.069553 -0.784678  
H O 0.000010 4.694320 -2.121067  
H O 0.000016 6.040904 -0.021942  
H O 0.000016 4.902457 2.196047

SCF Done: E(RPBE1PBE) = -  
2292.62289617  
Sum of electronic and zero-point  
Energies= -2292.352556  
Sum of electronic and thermal Energies=  
-2292.330616  
Sum of electronic and thermal  
Enthalpies= -2292.329671  
Sum of electronic and thermal Free  
Energies= -2292.405735

#### 6.1.15.4 TD-DFT calculation of ground state of native BBTT under IEFPCM variation of PCM

(PBE1PBE/6-311++G\*\*, IEFPCM CH<sub>2</sub>Cl<sub>2</sub>)

```
#p td=(singlets,nstates=24) PBE1PBE/6-311++g(d,p) scrf=(iefpcm,solvent=dichloromethane) geom=check guess=read
<TDDFT> Excited State 1: Singlet-A
3.0205 eV 410.48 nm f=0.1223
<TDDFT>HOMO -> LUMO
93.3%
<TDDFT>HOMO -> LUMO+1 2.9%
<TDDFT> Excited State 2: Singlet-A
3.2617 eV 380.12 nm f=0.0087
<TDDFT>HOMO -> LUMO 3.1%
<TDDFT>HOMO -> LUMO+1 96.0%
<TDDFT> Excited State 3: Singlet-A
3.7254 eV 332.81 nm f=0.0014
<TDDFT>HOMO -> LUMO+2 85.1%
<TDDFT>HOMO -> LUMO+5 5.6%
<TDDFT>HOMO -> LUMO+7 5.6%
<TDDFT> Excited State 4: Singlet-A
3.8627 eV 320.98 nm f=0.0301
<TDDFT>HOMO -> LUMO+3 34.8%
<TDDFT>HOMO -> LUMO+4 11.3%
<TDDFT>HOMO -> LUMO+6 50.0%
<TDDFT> Excited State 5: Singlet-A
3.9339 eV 315.17 nm f=0.0094
<TDDFT>HOMO -> LUMO+3 31.5%
<TDDFT>HOMO -> LUMO+4 64.3%
<TDDFT> Excited State 6: Singlet-A
3.9491 eV 313.95 nm f=0.0184
<TDDFT>HOMO -> LUMO+2 11.5%
<TDDFT>HOMO -> LUMO+5 73.9%
<TDDFT>HOMO -> LUMO+7 10.2%
<TDDFT> Excited State 7: Singlet-A
4.0515 eV 306.02 nm f=0.0927
<TDDFT>HOMO -> LUMO+3 29.3%
<TDDFT>HOMO -> LUMO+4 21.2%
<TDDFT>HOMO -> LUMO+6 45.1%
<TDDFT> Excited State 8: Singlet-A
4.1055 eV 301.99 nm f=0.0077
<TDDFT>HOMO -> LUMO+2 2.1%
<TDDFT>HOMO -> LUMO+5 16.7%
<TDDFT>HOMO -> LUMO+7 71.2%
<TDDFT>HOMO -> LUMO+10 5.0%
<TDDFT> Excited State 9: Singlet-A
4.4532 eV 278.42 nm f=0.0087
<TDDFT>HOMO -> LUMO+8 86.0%
<TDDFT>HOMO -> LUMO+9 2.9%
<TDDFT>HOMO -> LUMO+13 5.0%
<TDDFT> Excited State 10: Singlet-A
4.6090 eV 269.00 nm f=0.1067
<TDDFT>HOMO-1 -> LUMO 87.1%
<TDDFT> Excited State 11: Singlet-A
4.6231 eV 268.19 nm f=0.1454
<TDDFT>HOMO-2 -> LUMO 77.9%
<TDDFT>HOMO-2 -> LUMO+1 2.3%
<TDDFT>HOMO-1 -> LUMO+4 2.2%
<TDDFT>HOMO -> LUMO+10 2.4%
<TDDFT>HOMO -> LUMO+12 6.2%
<TDDFT> Excited State 12: Singlet-A
4.7135 eV 263.04 nm f=0.0242
<TDDFT>HOMO-1 -> LUMO+1 92.8%
```

|                                                                     |                                                                     |
|---------------------------------------------------------------------|---------------------------------------------------------------------|
| <TDDFT> Excited State 13: Singlet-A<br>4.7985 eV 258.38 nm f=0.0001 | <TDDFT>HOMO-1 -> LUMO+2<br>24.5%                                    |
| <TDDFT>HOMO-2 -> LUMO 5.8%                                          | <TDDFT>HOMO-1 -> LUMO+5<br>10.3%                                    |
| <TDDFT>HOMO-2 -> LUMO+1<br>83.8%                                    | <TDDFT> Excited State 18: Singlet-A<br>5.0825 eV 243.94 nm f=0.0018 |
| <TDDFT> Excited State 14: Singlet-A<br>4.8092 eV 257.81 nm f=0.0062 | <TDDFT>HOMO -> LUMO+8 5.8%                                          |
| <TDDFT>HOMO -> LUMO+9<br>72.4%                                      | <TDDFT>HOMO -> LUMO+9<br>16.7%                                      |
| <TDDFT>HOMO -> LUMO+11<br>20.0%                                     | <TDDFT>HOMO -> LUMO+11<br>67.6%                                     |
| <TDDFT> Excited State 15: Singlet-A<br>4.8656 eV 254.82 nm f=0.2878 | <TDDFT>HOMO -> LUMO+13 3.4%                                         |
| <TDDFT>HOMO-2 -> LUMO 5.4%                                          | <TDDFT>HOMO -> LUMO+18 2.1%                                         |
| <TDDFT>HOMO-2 -> LUMO+1 4.6%                                        | <TDDFT> Excited State 19: Singlet-A<br>5.1297 eV 241.70 nm f=0.0473 |
| <TDDFT>HOMO-1 -> LUMO+6 2.8%                                        | <TDDFT>HOMO-2 -> LUMO+1 4.8%                                        |
| <TDDFT>HOMO -> LUMO+7 3.3%                                          | <TDDFT>HOMO-2 -> LUMO+2<br>14.6%                                    |
| <TDDFT>HOMO -> LUMO+10<br>51.3%                                     | <TDDFT>HOMO-2 -> LUMO+5 3.7%                                        |
| <TDDFT>HOMO -> LUMO+12<br>23.0%                                     | <TDDFT>HOMO-2 -> LUMO+7 3.0%                                        |
| <TDDFT>HOMO -> LUMO+21 2.3%                                         | <TDDFT>HOMO-1 -> LUMO+3<br>31.6%                                    |
| <TDDFT> Excited State 16: Singlet-A<br>5.0285 eV 246.56 nm f=0.0725 | <TDDFT>HOMO-1 -> LUMO+4 8.5%                                        |
| <TDDFT>HOMO-1 -> LUMO+6 3.7%                                        | <TDDFT>HOMO-1 -> LUMO+6<br>18.5%                                    |
| <TDDFT>HOMO -> LUMO+7 5.2%                                          | <TDDFT>HOMO -> LUMO+15 2.2%                                         |
| <TDDFT>HOMO -> LUMO+10<br>27.5%                                     | <TDDFT>HOMO -> LUMO+21 2.8%                                         |
| <TDDFT>HOMO -> LUMO+12<br>44.5%                                     | <TDDFT> Excited State 20: Singlet-A<br>5.1509 eV 240.70 nm f=0.0081 |
| <TDDFT>HOMO -> LUMO+15<br>10.7%                                     | <TDDFT>HOMO-3 -> LUMO+1<br>11.1%                                    |
| <TDDFT> Excited State 17: Singlet-A<br>5.0432 eV 245.85 nm f=0.0136 | <TDDFT>HOMO-2 -> LUMO+3<br>14.4%                                    |
| <TDDFT>HOMO-4 -> LUMO+4 2.3%                                        | <TDDFT>HOMO-2 -> LUMO+4 6.2%                                        |
| <TDDFT>HOMO-3 -> LUMO<br>39.7%                                      | <TDDFT>HOMO-2 -> LUMO+6<br>22.6%                                    |
| <TDDFT>HOMO-2 -> LUMO+3 5.1%                                        | <TDDFT>HOMO-1 -> LUMO+1 2.5%                                        |
| <TDDFT>HOMO-2 -> LUMO+4 2.1%                                        | <TDDFT>HOMO-1 -> LUMO+2<br>19.0%                                    |
| <TDDFT>HOMO-2 -> LUMO+6 2.9%                                        | <TDDFT>HOMO-1 -> LUMO+7<br>12.9%                                    |
| <TDDFT>HOMO-1 -> LUMO 2.4%                                          |                                                                     |

|                                                                     |                                                                     |       |
|---------------------------------------------------------------------|---------------------------------------------------------------------|-------|
| <TDDFT> Excited State 21: Singlet-A<br>5.2202 eV 237.51 nm f=0.0131 | <TDDFT>HOMO-1 -> LUMO+4                                             | 8.7%  |
| <TDDFT>HOMO -> LUMO+8                                               | <TDDFT>HOMO-1 -> LUMO+6                                             | 18.6% |
| <TDDFT>HOMO -> LUMO+9                                               | <TDDFT>HOMO -> LUMO+10                                              | 2.3%  |
| <TDDFT>HOMO -> LUMO+11                                              | <TDDFT>HOMO -> LUMO+15                                              | 15.5% |
| <TDDFT>HOMO -> LUMO+13                                              | <TDDFT>HOMO -> LUMO+16                                              | 8.2%  |
| <TDDFT> Excited State 22: Singlet-A<br>5.2266 eV 237.22 nm f=0.0301 | <TDDFT>HOMO -> LUMO+21                                              | 11.4% |
| <TDDFT>HOMO-3 -> LUMO                                               | <TDDFT> Excited State 24: Singlet-A<br>5.2921 eV 234.28 nm f=0.0332 |       |
| <TDDFT>HOMO-3 -> LUMO+1                                             | <TDDFT>HOMO-4 -> LUMO                                               | 2.8%  |
| <TDDFT>HOMO-2 -> LUMO+3                                             | <TDDFT>HOMO-3 -> LUMO+4                                             | 2.8%  |
| <TDDFT>HOMO-2 -> LUMO+6                                             | <TDDFT>HOMO-2 -> LUMO+2                                             | 25.7% |
| <TDDFT>HOMO-1 -> LUMO+2                                             | <TDDFT>HOMO-2 -> LUMO+5                                             | 7.1%  |
| <TDDFT> Excited State 23: Singlet-A<br>5.2520 eV 236.07 nm f=0.0080 | <TDDFT>HOMO-2 -> LUMO+7                                             | 6.4%  |
| <TDDFT>HOMO-4 -> LUMO                                               | <TDDFT>HOMO-1 -> LUMO+3                                             | 20.9% |
| <TDDFT>HOMO-3 -> LUMO+3                                             | <TDDFT>HOMO-1 -> LUMO+6                                             | 13.1% |
| <TDDFT>HOMO-2 -> LUMO+2                                             | <TDDFT>HOMO -> LUMO+12                                              | 5.4%  |
| <TDDFT>HOMO-2 -> LUMO+5                                             | <TDDFT>HOMO -> LUMO+15                                              | 4.6%  |
|                                                                     | <TDDFT>HOMO -> LUMO+21                                              | 2.1%  |

#### 6.1.15.5 Minimum geometry of excited state of native BBTT under IEFPCM variation of PCM

(PBE1PBE/6-311++G\*\*, IEFPCM CH<sub>2</sub>Cl<sub>2</sub>)

```

#p opt td=(nstates=4) PBE1PBE/6-311++g(d,p) freq scrf=(iefpcm,solvent=
dichloromethane) geom=check
guess=read
0 1
C 0 -5.474510 -2.122242 -0.034205
C 0 -4.616949 -3.225140 -0.016108
C 0 -3.240325 -3.065793 -0.002008
C 0 -2.688967 -1.770201 -0.004805
C 0 -3.577794 -0.666334 -0.024141
C 0 -4.951837 -0.826985 -0.038943
C 0 -1.329438 -1.354286 0.005784
C 0 -1.189601 0.053997 -0.012000
S 0 -2.730810 0.883628 -0.021946
S 0 -0.000001 -2.437135 0.098464
C 0 1.329437 -1.354287 0.005784
C 0 1.189601 0.053997 -0.012000
N 0 0.000000 0.718305 -0.012083
C 0 2.688965 -1.770202 -0.004806
C 0 3.577793 -0.666337 -0.024140
S 0 2.730810 0.883626 -0.021943
C 0 3.240323 -3.065795 -0.002009
C 0 4.616947 -3.225142 -0.016110
C 0 5.474508 -2.122245 -0.034204
C 0 4.951836 -0.826988 -0.038942
C 0 0.000001 2.140975 0.004271
C 0 0.000003 2.872363 -1.181157

```

|     |           |           |           |                                         |          |          |           |
|-----|-----------|-----------|-----------|-----------------------------------------|----------|----------|-----------|
| C 0 | 0.000003  | 4.253204  | -1.183927 | H 0                                     | 5.611539 | 0.034116 | -0.053111 |
| C 0 | 0.000003  | 4.918740  | 0.036183  | H 0                                     | 0.000004 | 4.785919 | -2.126899 |
| C 0 | 0.000001  | 4.225224  | 1.240968  | H 0                                     | 0.000004 | 6.002591 | 0.048593  |
| C 0 | -0.000001 | 2.845024  | 1.206125  | H 0                                     | 0.000001 | 4.735982 | 2.195998  |
| F 0 | -0.000001 | 2.147611  | 2.342059  | SCF Done: E(RPBE1PBE) = -               |          |          |           |
| F 0 | 0.000002  | 2.202002  | -2.333405 | 2292.61099711                           |          |          |           |
| H 0 | -6.549091 | -2.266960 | -0.044479 | Sum of electronic and zero-point        |          |          |           |
| H 0 | -5.034541 | -4.226846 | -0.013736 | Energies= -2292.261424                  |          |          |           |
| H 0 | -2.590771 | -3.935472 | 0.010400  | Sum of electronic and thermal Energies= |          |          |           |
| H 0 | -5.611540 | 0.034119  | -0.053114 | -2292.238472                            |          |          |           |
| H 0 | 2.590768  | -3.935474 | 0.010397  | Sum of electronic and thermal           |          |          |           |
| H 0 | 5.034538  | -4.226849 | -0.013738 | Enthalpies= -2292.237528                |          |          |           |
| H 0 | 6.549089  | -2.266964 | -0.044478 | Sum of electronic and thermal Free      |          |          |           |
|     |           |           |           | Energies= -2292.317031                  |          |          |           |

#### 6.1.15.6 TD-DFT calculation of excited state of native BBTT under IEFPCM variation of PCM

(PBE1PBE/6-311++G\*\*, IEFPCM CH<sub>2</sub>Cl<sub>2</sub>)

|                                                                                                              |                                                                    |
|--------------------------------------------------------------------------------------------------------------|--------------------------------------------------------------------|
| #p opt td=(nstates=4) PBE1PBE/6-311++g(d,p) freq scrf=(iefpcm,solvent=dichloromethane) geom=check guess=read | <TDDFT> Excited State 3: Singlet-A<br>3.3047 eV 375.17 nm f=0.0004 |
| <TDDFT> Excited State 1: Singlet-A<br>2.2662 eV 547.11 nm f=0.1098                                           | <TDDFT>HOMO -> LUMO+2<br>98.5%                                     |
| <TDDFT>HOMO -> LUMO<br>98.3%                                                                                 | <TDDFT> Excited State 4: Singlet-A<br>3.3244 eV 372.95 nm f=0.0002 |
| <TDDFT> Excited State 2: Singlet-A<br>2.7426 eV 452.07 nm f=0.0003                                           | <TDDFT>HOMO -> LUMO+4<br>83.3%                                     |
| <TDDFT>HOMO -> LUMO+1<br>99.2%                                                                               | <TDDFT>HOMO -> LUMO+6<br>14.6%                                     |

#### 6.1.15.7 Minimum geometry of native BBTT under SMD variation of PCM (B3LYP/6-311++G\*\*, SMD CH<sub>2</sub>Cl<sub>2</sub>)

|                                                                                                                                          |           |           |           |           |           |           |           |
|------------------------------------------------------------------------------------------------------------------------------------------|-----------|-----------|-----------|-----------|-----------|-----------|-----------|
| #p opt=verytight Int=UltraFine<br>freq=noraman rb3lyp/6-311++g(d,p) pop=f<br>ull scrf=(SMD,solvent=dichloromethane)<br>geom=check<br>0 1 | C 0       | -4.866509 | -1.036975 | -0.734450 |           |           |           |
| C 0                                                                                                                                      | -5.351978 | -2.308494 | -0.443640 | C 0       | -1.335966 | -1.217711 | 0.296244  |
| C 0                                                                                                                                      | -4.508631 | -3.291148 | 0.098012  | C 0       | -1.195329 | 0.077000  | -0.095245 |
| C 0                                                                                                                                      | -3.172906 | -3.018659 | 0.362039  | S 0       | -2.678922 | 0.747893  | -0.786772 |
| C 0                                                                                                                                      | -2.659267 | -1.742686 | 0.076985  | S 0       | 0.000000  | -2.141475 | 1.041406  |
| C 0                                                                                                                                      | -3.522783 | -0.768737 | -0.477697 | C 0       | 1.335966  | -1.217711 | 0.296244  |
|                                                                                                                                          |           |           |           | C 0       | 1.195329  | 0.077000  | -0.095245 |
|                                                                                                                                          |           |           |           | N 0       | 0.000000  | 0.808828  | -0.090617 |
|                                                                                                                                          |           |           |           | C 0       | 2.659267  | -1.742686 | 0.076985  |

|     |           |           |           |                                         |           |           |           |
|-----|-----------|-----------|-----------|-----------------------------------------|-----------|-----------|-----------|
| C 0 | 3.522783  | -0.768737 | -0.477696 | H 0                                     | -5.517411 | -0.279463 | -1.155764 |
| S 0 | 2.678923  | 0.747893  | -0.786772 | H 0                                     | 2.530161  | -3.784197 | 0.782251  |
| C 0 | 3.172906  | -3.018659 | 0.362039  | H 0                                     | 4.906183  | -4.276129 | 0.315296  |
| C 0 | 4.508632  | -3.291148 | 0.098013  | H 0                                     | 6.392367  | -2.540003 | -0.641149 |
| C 0 | 5.351978  | -2.308494 | -0.443639 | H 0                                     | 5.517412  | -0.279463 | -1.155762 |
| C 0 | 4.866509  | -1.036975 | -0.734449 | H 0                                     | 0.000001  | 5.209912  | -1.450698 |
| C 0 | -0.000000 | 2.210366  | 0.175900  | H 0                                     | -0.000001 | 6.028024  | 0.909146  |
| C 0 | 0.000001  | 3.156401  | -0.852074 | H 0                                     | -0.000002 | 4.394214  | 2.798911  |
| C 0 | 0.000001  | 4.520654  | -0.615685 | SCF Done: E(RB3LYP) = -                 |           |           |           |
| C 0 | -0.000000 | 4.964247  | 0.704697  | 2294.33620295                           |           |           |           |
| C 0 | -0.000001 | 4.062566  | 1.768376  | Sum of electronic and zero-point        |           |           |           |
| C 0 | -0.000001 | 2.709706  | 1.482470  | Energies= -2294.068893                  |           |           |           |
| F 0 | -0.000002 | 1.818555  | 2.496642  | Sum of electronic and thermal Energies= |           |           |           |
| F 0 | 0.000002  | 2.708330  | -2.127664 | -2294.046831                            |           |           |           |
| H 0 | -6.392366 | -2.540003 | -0.641150 | Sum of electronic and thermal           |           |           |           |
| H 0 | -4.906183 | -4.276129 | 0.315296  | Enthalpies= -2294.045887                |           |           |           |
| H 0 | -2.530161 | -3.784197 | 0.782251  | Sum of electronic and thermal Free      |           |           |           |
|     |           |           |           | Energies= -2294.122185                  |           |           |           |

#### 6.1.15.8 Minimum geometry of radical cation of BBTT in gas phase (B3LYP/6-311++G\*\*)

```
#p opt freq=norman ub3lyp/6-
311++g(d,p) pop=full
0 1
```

|     |           |           |           |     |           |           |           |
|-----|-----------|-----------|-----------|-----|-----------|-----------|-----------|
| C 0 | -5.479883 | -2.112524 | -0.000308 | C 0 | 3.250472  | -3.066874 | -0.000012 |
| C 0 | -4.626261 | -3.226602 | -0.000040 | C 0 | 4.626169  | -3.226711 | 0.000029  |
| C 0 | -3.250561 | -3.066800 | 0.000035  | C 0 | 5.479819  | -2.112654 | 0.000248  |
| C 0 | -2.712375 | -1.768148 | -0.000131 | C 0 | 4.970850  | -0.817810 | 0.000402  |
| C 0 | -3.588987 | -0.660252 | -0.000364 | C 0 | 0.000014  | 2.151989  | 0.000009  |
| C 0 | -4.970882 | -0.817693 | -0.000479 | C 0 | 0.000980  | 2.869716  | -1.199595 |
| C 0 | -1.338089 | -1.348906 | -0.000012 | C 0 | 0.001058  | 4.252877  | -1.216770 |
| C 0 | -1.196950 | 0.031088  | -0.000105 | C 0 | 0.000112  | 4.933533  | 0.000039  |
| S 0 | -2.723083 | 0.879880  | -0.000419 | C 0 | -0.000881 | 4.252850  | 1.216833  |
| S 0 | -0.000034 | -2.467566 | 0.000067  | C 0 | -0.000894 | 2.869691  | 1.199630  |
| C 0 | 1.338044  | -1.348934 | 0.000040  | F 0 | -0.001741 | 2.176522  | 2.346747  |
| C 0 | 1.196938  | 0.031064  | 0.000092  | F 0 | 0.001804  | 2.176573  | -2.346728 |
| N 0 | 0.000000  | 0.714544  | -0.000005 | H 0 | -6.552988 | -2.260186 | -0.000395 |
| C 0 | 2.712319  | -1.768210 | 0.000139  | H 0 | -5.049802 | -4.223258 | 0.000119  |
| C 0 | 3.588958  | -0.660335 | 0.000320  | H 0 | -2.600897 | -3.934627 | 0.000205  |
| S 0 | 2.723090  | 0.879818  | 0.000344  | H 0 | -5.634699 | 0.038066  | -0.000729 |
|     |           |           |           | H 0 | 2.600787  | -3.934685 | -0.000146 |
|     |           |           |           | H 0 | 5.049686  | -4.223377 | -0.000120 |
|     |           |           |           | H 0 | 6.552920  | -2.260341 | 0.000310  |



H O 5.634688 0.037932 0.000612  
H O 0.001807 4.774045 -2.165167  
H O 0.000147 6.016529 0.000051  
H O -0.001596 4.773999 2.165242  
SCF Done: E(UB3LYP) = -  
2294.08281247

Sum of electronic and zero-point  
Energies= -2293.814566  
Sum of electronic and thermal Energies=  
-2293.792615  
Sum of electronic and thermal  
Enthalpies= -2293.791671  
Sum of electronic and thermal Free  
Energies= -2293.867565

### 6.1.15.9 Minimum geometry of radical cation of BBTT under IEFPCM variation of PCM

(B3LYP/6-311++G\*\*, IEFPCM CH<sub>2</sub>Cl<sub>2</sub>)

#p ub3lyp/6-311++g(d,p) opt  
freq=norman scf=maxcycle=1000  
scrf=(iefpc  
m,solvent=dichloromethane) geom=check  
guess=read

0 1  
C O 5.479887 -2.110878 0.008690  
C O 4.626221 -3.225247 0.006279  
C O 3.249629 -3.066074 0.004075  
C O 2.711460 -1.767647 0.004230  
C O 3.587316 -0.659230 0.006673  
C O 4.970078 -0.816119 0.008941  
C O 1.335817 -1.350102 0.001660  
C O 1.195934 0.029242 0.002064  
S O 2.721087 0.879796 0.006222  
S O 0.000007 -2.468503 0.000017  
C O -1.335808 -1.350108 -0.001644  
C O -1.195932 0.029236 -0.002053  
N O -0.000000 0.712870 0.000006  
C O -2.711449 -1.767659 -0.004225  
C O -3.587311 -0.659247 -0.006683  
S O -2.721089 0.879783 -0.006234  
C O -3.249612 -3.066089 -0.004070  
C O -4.626203 -3.225269 -0.006287  
C O -5.479874 -2.110905 -0.008712  
C O -4.970071 -0.816143 -0.008965  
C O -0.000003 2.149491 0.000004

C O -0.024874 2.869172 1.197627  
C O -0.025343 4.251560 1.216008  
C O -0.000027 4.932608 -0.000001  
C O 0.025305 4.251556 -1.216008  
C O 0.024862 2.869169 -1.197622  
F O 0.048381 2.177103 -2.349063  
F O -0.048389 2.177110 2.349070  
H O 6.553107 -2.257612 0.010322  
H O 5.049222 -4.222187 0.006087  
H O 2.600094 -3.933429 0.002176  
H O 5.632379 0.040435 0.010816  
H O -2.600072 -3.933441 -0.002161  
H O -5.049199 -4.222211 -0.006094  
H O -6.553093 -2.257644 -0.010354  
H O -5.632377 0.040408 -0.010852  
H O -0.044997 4.773681 2.163307  
H O -0.000039 6.015185 -0.000002  
H O 0.044948 4.773675 -2.163309

SCF Done: E(UB3LYP) = -  
2294.13424385  
Sum of electronic and zero-point  
Energies= -2293.866144  
Sum of electronic and thermal Energies=  
-2293.844145  
Sum of electronic and thermal  
Enthalpies= -2293.843201  
Sum of electronic and thermal Free  
Energies= -2293.919413

6.1.15.10 Minimum geometry of radical cation of BBTT under SMD variation of PCM

(B3LYP/6-311++G\*\*, SMD CH<sub>2</sub>Cl<sub>2</sub>)

```
#p opt freq=noraman ub3lyp/6-
311++g(d,p) pop=full
scrf=(SMD,solvent=di
chloromethane)
0 1
C 0 -5.475893 -2.120693 -0.008737
C 0 -4.618683 -3.232345 -0.005569
C 0 -3.242519 -3.069283 -0.003150
C 0 -2.710091 -1.768401 -0.003912
C 0 -3.589726 -0.663154 -0.007463
C 0 -4.971740 -0.823263 -0.009807
C 0 -1.336784 -1.346515 -0.001427
C 0 -1.195512 0.032192 -0.002224
S 0 -2.725713 0.879071 -0.008876
S 0 -0.000033 -2.465199 -0.000012
C 0 1.336719 -1.346554 0.001368
C 0 1.195451 0.032161 0.002120
N 0 -0.000037 0.716557 -0.000006
C 0 2.710012 -1.768494 0.003872
C 0 3.589706 -0.663298 0.007414
S 0 2.725714 0.878922 0.008751
C 0 3.242348 -3.069411 0.003178
C 0 4.618498 -3.232583 0.005670
C 0 5.475781 -2.120984 0.008840
C 0 4.971717 -0.823520 0.009824
C 0 -0.000032 2.153836 0.000016
C 0 0.026737 2.875569 -1.197012
C 0 0.028034 4.257186 -1.215952
C 0 0.000415 4.938273 0.000069
C 0 -0.027478 4.257155 1.216058
C 0 -0.026731 2.875530 1.197061
F 0 -0.051814 2.183099 2.351082
F 0 0.051667 2.183175 -2.351055
H 0 -6.548852 -2.271667 -0.010238
H 0 -5.038844 -4.230826 -0.004826
H 0 -2.590550 -3.935613 -0.000359
H 0 -5.638920 0.030346 -0.012134
H 0 2.590274 -3.935660 0.000358
H 0 5.038599 -4.231089 0.004975
H 0 6.548735 -2.272021 0.010407
H 0 5.638984 0.030023 0.012146
H 0 0.049248 4.778829 -2.164184
H 0 0.000612 6.021414 0.000086
H 0 -0.048556 4.778759 2.164315
SCF Done: E(UB3LYP) = -
2294.15959933
Sum of electronic and zero-point
Energies= -2293.891335
Sum of electronic and thermal Energies=
-2293.869500
Sum of electronic and thermal
Enthalpies= -2293.868556
Sum of electronic and thermal Free
Energies= -2293.943977
```

6.1.15.11 Transition state of native BBTT under IEFPCM variation of PCM

(B3LYP/6-311++G\*\*, IEFPCM CH<sub>2</sub>Cl<sub>2</sub>)

```
#p opt=(ts,noeigen,calcfc) freq=noraman
b3lyp/6-311++g(d,p) pop=full s
crf=(iefpcm,solvent=dichloromethane)
0 1
C 0 5.500256 -2.122927 0.003442
C 0 4.636243 -3.228260 0.003539
C 0 3.257645 -3.058208 0.001999
C 0 2.721341 -1.758937 0.000362
C 0 3.609917 -0.658506 0.000229
C 0 4.992528 -0.826182 0.001745
C 0 1.344786 -1.341175 -0.001441
C 0 1.200291 0.012148 -0.002731
```

|     |           |           |           |                                         |           |           |           |
|-----|-----------|-----------|-----------|-----------------------------------------|-----------|-----------|-----------|
| S O | 2.738698  | 0.872611  | -0.002151 | H O                                     | 6.572975  | -2.275967 | 0.004648  |
| S O | 0.000043  | -2.520646 | 0.000781  | H O                                     | 5.050437  | -4.229874 | 0.004829  |
| C O | -1.344713 | -1.341178 | -0.001498 | H O                                     | 2.601087  | -3.921007 | 0.002048  |
| C O | -1.200240 | 0.012159  | -0.003175 | H O                                     | 5.658290  | 0.028761  | 0.001685  |
| N O | -0.000079 | 0.731627  | -0.004887 | H O                                     | -2.600922 | -3.921051 | 0.001444  |
| C O | -2.721252 | -1.758986 | -0.001469 | H O                                     | -5.050262 | -4.230013 | 0.001405  |
| C O | -3.609873 | -0.658592 | -0.003212 | H O                                     | -6.572875 | -2.276166 | -0.000571 |
| S O | -2.738709 | 0.872554  | -0.005313 | H O                                     | -5.658270 | 0.028597  | -0.004116 |
| C O | -3.257512 | -3.058277 | 0.000193  | H O                                     | -0.011525 | 4.784574  | 2.170501  |
| C O | -4.636105 | -3.228382 | 0.000367  | H O                                     | 0.000005  | 6.037808  | 0.011468  |
| C O | -5.500160 | -2.123085 | -0.001105 | H O                                     | 0.011466  | 4.797791  | -2.155127 |
| C O | -4.992478 | -0.826321 | -0.002871 | SCF Done: E(RB3LYP) = -                 |           |           |           |
| C O | -0.000121 | 2.152739  | -0.000407 | 2294.31318747                           |           |           |           |
| C O | -0.006312 | 2.883435  | 1.192825  | Sum of electronic and zero-point        |           |           |           |
| C O | -0.006532 | 4.267114  | 1.220197  | Energies= -2294.046035                  |           |           |           |
| C O | -0.000029 | 4.954973  | 0.008169  | Sum of electronic and thermal Energies= |           |           |           |
| C O | 0.006431  | 4.274529  | -1.208006 | -2294.024700                            |           |           |           |
| C O | 0.006126  | 2.890661  | -1.189139 | Sum of electronic and thermal           |           |           |           |
| F O | -0.012175 | 2.198871  | 2.352742  | Enthalpies= -2294.023755                |           |           |           |
| F O | 0.011977  | 2.213396  | -2.353315 | Sum of electronic and thermal Free      |           |           |           |
|     |           |           |           | Energies= -2294.098086                  |           |           |           |

## 6.1.16 *anti-anti-N-ortho,ortho'*-fluoromethylphenyl-BBTT 3r

### 6.1.16.1 Minimum geometry of native BBTT in gas phase (B3LYP/6-311++G\*\*)

|                                          |           |           |           |           |           |           |           |
|------------------------------------------|-----------|-----------|-----------|-----------|-----------|-----------|-----------|
| Conformer I:                             | C O       | -1.197390 | 0.028419  | -0.023647 |           |           |           |
| #p opt freq=noraman rb3lyp/6-311++g(d,p) | N O       | -0.000021 | 0.750577  | -0.041621 |           |           |           |
| pop=full                                 | C O       | -2.710444 | -1.749994 | 0.013934  |           |           |           |
| 0 1                                      | C O       | -3.598301 | -0.664216 | -0.164780 |           |           |           |
| C O                                      | 5.479940  | -2.139262 | -0.166662 | S O       | -2.733973 | 0.867454  | -0.248948 |
| C O                                      | 4.616034  | -3.230217 | 0.005400  | C O       | -3.242462 | -3.047459 | 0.097591  |
| C O                                      | 3.243101  | -3.046846 | 0.098031  | C O       | -4.615334 | -3.231068 | 0.004630  |
| C O                                      | 2.710887  | -1.749478 | 0.014373  | C O       | -5.479372 | -2.140273 | -0.167761 |
| C O                                      | 3.598629  | -0.663538 | -0.163891 | C O       | -4.975711 | -0.845570 | -0.253093 |
| C O                                      | 4.976079  | -0.844625 | -0.251929 | C O       | -0.000281 | 2.178037  | 0.063724  |
| C O                                      | 1.341518  | -1.319154 | 0.099860  | C O       | -0.001749 | 2.772293  | 1.327927  |
| C O                                      | 1.197479  | 0.028660  | -0.023559 | C O       | -0.002188 | 4.145404  | 1.502069  |
| S O                                      | 2.733974  | 0.868013  | -0.248108 | C O       | -0.001195 | 4.948029  | 0.365112  |
| S O                                      | 0.000249  | -2.463201 | 0.393780  | C O       | 0.000156  | 4.379416  | -0.906500 |
| C O                                      | -1.341191 | -1.319430 | 0.099774  | C O       | 0.000674  | 2.992295  | -1.083648 |

C O 0.003003 2.384396 -2.463588  
 F O -0.002785 1.975268 2.413348  
 H O 6.549076 -2.302356 -0.235075  
 H O 5.026523 -4.231459 0.068574  
 H O 2.584043 -3.897367 0.230267  
 H O 5.641574 0.000421 -0.385310  
 H O -2.583287 -3.897844 0.230122  
 H O -5.025677 -4.232363 0.067834  
 H O -6.548472 -2.303555 -0.236460  
 H O -5.641322 -0.000657 -0.386740  
 H O -0.003329 4.558539 2.502668  
 H O -0.001606 6.026498 0.473212  
 H O 0.000717 5.020983 -1.780176  
 H O -0.007673 3.165816 -3.224513  
 H O 0.889552 1.765194 -2.622929  
 H O -0.870190 1.745527 -2.618052  
 SCF Done: E(RB3LYP) = -  
 2234.36949655  
 Sum of electronic and zero-point  
 Energies= -2234.066518  
 Sum of electronic and thermal Energies=  
 -2234.043420  
 Sum of electronic and thermal  
 Enthalpies= -2234.042476  
 Sum of electronic and thermal Free  
 Energies= -2234.122518  
 Conformer II:  
 #p opt freq=noraman rb3lyp/6-311++g(d,p)  
 pop=full  
 0 1  
 C O -5.361857 -2.268215 -0.472700  
 C O -4.514114 -3.293915 -0.028888  
 C O -3.175370 -3.046452 0.240475  
 C O -2.661263 -1.752226 0.060358  
 C O -3.529265 -0.733117 -0.397043  
 C O -4.875437 -0.978195 -0.658951  
 C O -1.334208 -1.253717 0.302372  
 C O -1.194738 0.069532 0.013857  
 S O -2.687224 0.802387 -0.583876

S O -0.000294 -2.234082 0.974869  
 C O 1.333751 -1.254081 0.302117  
 C O 1.194551 0.069199 0.013665  
 N O 0.000020 0.794921 0.070118  
 C O 2.660587 -1.752961 0.059603  
 C O 3.528689 -0.734100 -0.398144  
 S O 2.686998 0.801643 -0.584672  
 C O 3.174415 -3.047326 0.239609  
 C O 4.513006 -3.295130 -0.030222  
 C O 5.360859 -2.269663 -0.474363  
 C O 4.874713 -0.979527 -0.660498  
 C O 0.000364 2.222560 0.180454  
 C O -0.001211 3.010480 -0.971992  
 C O -0.000887 4.395139 -0.923704  
 C O 0.001141 5.006954 0.325238  
 C O 0.002783 4.242174 1.490425  
 C O 0.002433 2.846065 1.441499  
 C O 0.004497 2.017669 2.699736  
 F O -0.003044 2.402356 -2.175943  
 H O -6.404780 -2.480453 -0.676972  
 H O -4.910734 -4.293688 0.105763  
 H O -2.524788 -3.844360 0.580062  
 H O -5.528005 -0.185675 -1.006571  
 H O 2.523716 -3.845048 0.579427  
 H O 4.909445 -4.294996 0.104284  
 H O 6.403649 -2.482201 -0.679000  
 H O 5.527375 -0.187189 -1.008361  
 H O -0.002175 4.961759 -1.846057  
 H O 0.001410 6.088865 0.389938  
 H O 0.004309 4.735580 2.455663  
 H O 0.001578 2.658832 3.582079  
 H O -0.871525 1.365098 2.746296  
 H O 0.885461 1.371781 2.747548  
 SCF Done: E(RB3LYP) = -  
 2234.37059664  
 Sum of electronic and zero-point  
 Energies= -2234.067657

Sum of electronic and thermal Energies=  
-2234.044580

Sum of electronic and thermal Free  
Energies= -2234.122561

Sum of electronic and thermal  
Enthalpies= -2234.043636

### 6.1.16.2 Minimum geometry of native BBTT under IEFPCM variation of PCM

(B3LYP/6-311++G\*\*, IEFPCM CH<sub>2</sub>Cl<sub>2</sub>)

Conformer I:  
No minimum found on the potential hyper  
surface.  
Conformer II:  
#p opt=tight freq=noraman rb3lyp/6-  
311++g(d,p) scrf=(iefpcm,solvent=di  
chloromethane) pop=full geom=check  
guess=read  
0 1

|     |           |           |           |     |           |           |           |
|-----|-----------|-----------|-----------|-----|-----------|-----------|-----------|
| C 0 | -0.000010 | 2.926446  | -1.029408 | C 0 | -0.000010 | 2.926446  | -1.029408 |
| C 0 | -0.000013 | 4.309864  | -1.072349 | C 0 | -0.000013 | 4.309864  | -1.072349 |
| C 0 | -0.000005 | 4.999154  | 0.136887  | C 0 | -0.000005 | 4.999154  | 0.136887  |
| C 0 | 0.000005  | 4.309983  | 1.348706  | C 0 | 0.000005  | 4.309983  | 1.348706  |
| C 0 | 0.000006  | 2.912940  | 1.390344  | C 0 | 0.000006  | 2.912940  | 1.390344  |
| C 0 | 0.000016  | 2.168531  | 2.699951  | C 0 | 0.000016  | 2.168531  | 2.699951  |
| F 0 | -0.000019 | 2.236199  | -2.194381 | F 0 | -0.000019 | 2.236199  | -2.194381 |
| H 0 | -6.431432 | -2.429016 | -0.657921 | H 0 | -6.431432 | -2.429016 | -0.657921 |
| H 0 | -4.935415 | -4.287612 | 0.008866  | H 0 | -4.935415 | -4.287612 | 0.008866  |
| H 0 | -2.541511 | -3.877020 | 0.469129  | H 0 | -2.541511 | -3.877020 | 0.469129  |
| H 0 | -5.546731 | -0.123650 | -0.882825 | H 0 | -5.546731 | -0.123650 | -0.882825 |
| H 0 | 2.541514  | -3.877008 | 0.469139  | H 0 | 2.541514  | -3.877008 | 0.469139  |
| H 0 | 4.935428  | -4.287603 | 0.008870  | H 0 | 4.935428  | -4.287603 | 0.008870  |
| H 0 | 6.431434  | -2.429008 | -0.657924 | H 0 | 6.431434  | -2.429008 | -0.657924 |
| H 0 | 5.546730  | -0.123646 | -0.882839 | H 0 | 5.546730  | -0.123646 | -0.882839 |
| H 0 | -0.000021 | 4.819146  | -2.027494 | H 0 | -0.000021 | 4.819146  | -2.027494 |
| H 0 | -0.000007 | 6.082698  | 0.132447  | H 0 | -0.000007 | 6.082698  | 0.132447  |
| H 0 | 0.000011  | 4.864448  | 2.279879  | H 0 | 0.000011  | 4.864448  | 2.279879  |
| H 0 | 0.000029  | 2.866812  | 3.537285  | H 0 | 0.000029  | 2.866812  | 3.537285  |
| H 0 | -0.879347 | 1.525009  | 2.790191  | H 0 | -0.879347 | 1.525009  | 2.790191  |
| H 0 | 0.879371  | 1.524996  | 2.790172  | H 0 | 0.879371  | 1.524996  | 2.790172  |
| C 0 | -5.384126 | -2.232951 | -0.460468 | C 0 | 2.670417  | -1.758396 | 0.054017  |
| C 0 | -4.535016 | -3.284493 | -0.082547 | C 0 | 3.541404  | -0.713024 | -0.334831 |
| C 0 | -3.189647 | -3.058282 | 0.177648  | S 0 | 2.694535  | 0.828296  | -0.450355 |
| C 0 | -2.670413 | -1.758402 | 0.054020  | C 0 | 3.189652  | -3.058276 | 0.177648  |
| C 0 | -3.541404 | -0.713030 | -0.334820 | C 0 | 4.535021  | -3.284488 | -0.082544 |
| C 0 | -4.893267 | -0.936349 | -0.588058 | C 0 | 5.384129  | -2.232944 | -0.460471 |
| C 0 | -1.335210 | -1.279814 | 0.293016  | C 0 | 4.893268  | -0.936343 | -0.588068 |
| C 0 | -1.194025 | 0.056624  | 0.070721  | C 0 | -0.000001 | 2.212414  | 0.170536  |
| S 0 | -2.694538 | 0.828293  | -0.450342 |     |           |           |           |
| S 0 | 0.000003  | -2.305789 | 0.894877  |     |           |           |           |
| C 0 | 1.335214  | -1.279810 | 0.293020  |     |           |           |           |
| C 0 | 1.194027  | 0.056627  | 0.070720  |     |           |           |           |
| N 0 | -0.000000 | 0.779567  | 0.149081  |     |           |           |           |
| C 0 | 2.670417  | -1.758396 | 0.054017  |     |           |           |           |
| C 0 | 3.541404  | -0.713024 | -0.334831 |     |           |           |           |
| S 0 | 2.694535  | 0.828296  | -0.450355 |     |           |           |           |
| C 0 | 3.189652  | -3.058276 | 0.177648  |     |           |           |           |
| C 0 | 4.535021  | -3.284488 | -0.082544 |     |           |           |           |
| C 0 | 5.384129  | -2.232944 | -0.460471 |     |           |           |           |
| C 0 | 4.893268  | -0.936343 | -0.588068 |     |           |           |           |
| C 0 | -0.000001 | 2.212414  | 0.170536  |     |           |           |           |

SCF Done: E(RB3LYP) = -  
2234.37848338

Sum of electronic and zero-point  
Energies= -2234.075669

Sum of electronic and thermal Energies=  
-2234.052632

Sum of electronic and thermal  
Enthalpies= -2234.051688

Sum of electronic and thermal Free  
Energies= -2234.129989

### 6.1.16.3 Minimum geometry of native BBTT under SMD variation of PCM (B3LYP/6-311++G\*\*),

#### SMD CH<sub>2</sub>Cl<sub>2</sub>

|                                                  |           |           |           |                                         |           |           |           |
|--------------------------------------------------|-----------|-----------|-----------|-----------------------------------------|-----------|-----------|-----------|
| Conformer I:                                     | C 0       | -0.000076 | 2.965218  | -1.000449                               |           |           |           |
| No minimum found on the potential hyper surface. | C 0       | -0.000198 | 4.348809  | -1.011683                               |           |           |           |
|                                                  | C 0       | -0.000434 | 5.008384  | 0.214214                                |           |           |           |
| Conformer II:                                    | C 0       | -0.000536 | 4.290043  | 1.409099                                |           |           |           |
| #p opt freq=noraman rb3lyp/6-311++g(d,p)         | C 0       | -0.000399 | 2.892025  | 1.418067                                |           |           |           |
| scrf=(smd,solvent=dichloromet                    | C 0       | -0.000528 | 2.119080  | 2.709966                                |           |           |           |
| hane) pop=full geom=checkpoint                   | F 0       | 0.000180  | 2.302099  | -2.184245                               |           |           |           |
| guess=read                                       | H 0       | -6.412466 | -2.462271 | -0.690239                               |           |           |           |
| 0 1                                              | H 0       | -4.921250 | -4.295361 | 0.053877                                |           |           |           |
| C 0                                              | -5.368870 | -2.256462 | -0.481718 | H 0                                     | -2.538052 | -3.865783 | 0.539829  |
| C 0                                              | -4.522480 | -3.293618 | -0.060098 | H 0                                     | -5.531777 | -0.160371 | -0.968123 |
| C 0                                              | -3.181719 | -3.056125 | 0.214127  | H 0                                     | 2.538088  | -3.865251 | 0.539557  |
| C 0                                              | -2.664228 | -1.758673 | 0.059824  | H 0                                     | 4.921708  | -4.295013 | 0.053807  |
| C 0                                              | -3.532853 | -0.728492 | -0.372553 | H 0                                     | 6.412753  | -2.461648 | -0.690030 |
| C 0                                              | -4.880365 | -0.962243 | -0.639550 | H 0                                     | 5.531995  | -0.159926 | -0.967894 |
| C 0                                              | -1.335199 | -1.266211 | 0.308329  | H 0                                     | -0.000110 | 4.880738  | -1.954895 |
| C 0                                              | -1.193181 | 0.063852  | 0.051393  | H 0                                     | -0.000540 | 6.092177  | 0.235939  |
| S 0                                              | -2.688782 | 0.812851  | -0.519952 | H 0                                     | -0.000728 | 4.820733  | 2.354396  |
| S 0                                              | 0.000160  | -2.263682 | 0.957334  | H 0                                     | -0.000714 | 2.800940  | 3.561339  |
| C 0                                              | 1.335451  | -1.265968 | 0.308532  | H 0                                     | -0.880360 | 1.473669  | 2.787624  |
| C 0                                              | 1.193241  | 0.064062  | 0.051568  | H 0                                     | 0.879391  | 1.473821  | 2.787886  |
| N 0                                              | -0.000025 | 0.788098  | 0.121474  | SCF Done: E(RB3LYP) = -                 |           |           |           |
| C 0                                              | 2.664560  | -1.758250 | 0.060104  | 2234.40197679                           |           |           |           |
| C 0                                              | 3.533020  | -0.728025 | -0.372463 | Sum of electronic and zero-point        |           |           |           |
| S 0                                              | 2.688817  | 0.813213  | -0.519775 | Energies= -2234.099202                  |           |           |           |
| C 0                                              | 3.182096  | -3.055723 | 0.214190  | Sum of electronic and thermal Energies= |           |           |           |
| C 0                                              | 4.522807  | -3.293329 | -0.060135 | -2234.076235                            |           |           |           |
| C 0                                              | 5.369097  | -2.256008 | -0.481630 | Sum of electronic and thermal           |           |           |           |
| C 0                                              | 4.880538  | -0.961814 | -0.639439 | Enthalpies= -2234.075291                |           |           |           |
| C 0                                              | -0.000162 | 2.221109  | 0.180822  | Sum of electronic and thermal Free      |           |           |           |
|                                                  |           |           |           | Energies= -2234.152726                  |           |           |           |

### 6.1.16.4 Minimum geometry of radical cation of BBTT in gas phase (B3LYP/6-311++G\*\*),

|                               |     |           |           |           |
|-------------------------------|-----|-----------|-----------|-----------|
| #p opt freq=noraman ub3lyp/6- | 0 1 |           |           |           |
| 311++g(d,p) pop=full          | C 0 | -5.479812 | -2.102346 | -0.037268 |
|                               | C 0 | -4.627224 | -3.217245 | -0.027835 |
| SCF Done: E(UB3LYP) = -       | C 0 | -3.251508 | -3.058628 | -0.008101 |
| 2234.15059498                 |     |           |           |           |



|     |           |           |           |                                         |           |          |           |
|-----|-----------|-----------|-----------|-----------------------------------------|-----------|----------|-----------|
| C O | 4.965202  | -0.835516 | -0.009325 | H O                                     | 5.635122  | 0.015980 | -0.018096 |
| C O | 0.010052  | 2.170785  | 0.019738  | H O                                     | 0.152071  | 4.648214 | -2.310302 |
| C O | 0.076713  | 2.811600  | -1.220819 | H O                                     | 0.078077  | 6.014476 | -0.213170 |
| C O | 0.099822  | 4.186111  | -1.332504 | H O                                     | -0.035829 | 4.910109 | 1.989114  |
| C O | 0.057357  | 4.932541  | -0.155252 | H O                                     | 0.359576  | 2.877468 | 3.314137  |
| C O | -0.007788 | 4.309466  | 1.087366  | H O                                     | -1.196397 | 2.185403 | 2.862340  |
| C O | -0.036674 | 2.915068  | 1.209570  | H O                                     | 0.284057  | 1.264770 | 2.591181  |
| C O | -0.145642 | 2.267013  | 2.564115  | SCF Done: E(UB3LYP) = -                 |           |          |           |
| F O | 0.121828  | 2.044173  | -2.333508 | 2234.22785580                           |           |          |           |
| H O | -6.560902 | -2.231499 | -0.083578 | Sum of electronic and zero-point        |           |          |           |
| H O | -5.062418 | -4.199254 | -0.040397 | Energies= -2233.924175                  |           |          |           |
| H O | -2.613189 | -3.918088 | 0.008409  | Sum of electronic and thermal Energies= |           |          |           |
| H O | -5.636864 | 0.065265  | -0.080375 | -2233.901396                            |           |          |           |
| H O | 2.574127  | -3.939681 | 0.019067  | Sum of electronic and thermal           |           |          |           |
| H O | 5.021654  | -4.243159 | -0.005601 | Enthalpies= -2233.900452                |           |          |           |
| H O | 6.537897  | -2.288773 | -0.023871 | Sum of electronic and thermal Free      |           |          |           |
|     |           |           |           | Energies= -2233.977881                  |           |          |           |

### 6.1.17 *anti-anti-N-ortho,ortho'*-fluoromethoxyphenyl-BBTT 3s

#### 6.1.17.1 Minimum geometry of native BBTT in gas phase (B3LYP/6-311++G\*\*)

|                                          |     |           |           |           |
|------------------------------------------|-----|-----------|-----------|-----------|
| Conformer I:                             | S O | -2.704359 | 0.750004  | 0.181855  |
| #p opt freq=noraman rb3lyp/6-311++g(d,p) | C O | -3.197337 | -3.177881 | -0.032177 |
| pop=full                                 | C O | -4.548257 | -3.374315 | 0.219320  |
| 0 1                                      | C O | -5.402811 | -2.288670 | 0.460501  |
| C O                                      | C O | -4.910558 | -0.987015 | 0.457832  |
| C O                                      | C O | 0.000049  | 2.060118  | -0.442519 |
| C O                                      | C O | 0.000134  | 2.866376  | 0.718731  |
| C O                                      | C O | 0.000370  | 4.259308  | 0.594520  |
| C O                                      | C O | 0.000568  | 4.841467  | -0.671996 |
| C O                                      | C O | 0.000509  | 4.069191  | -1.827798 |
| C O                                      | C O | 0.000202  | 2.689928  | -1.685496 |
| C O                                      | F O | 0.000254  | 1.921854  | -2.788651 |
| S O                                      | O O | 0.000036  | 2.196088  | 1.891063  |
| S O                                      | C O | -0.000066 | 2.933958  | 3.110758  |
| C O                                      | H O | 6.454837  | -2.462685 | 0.652951  |
| C O                                      | H O | 4.948801  | -4.381913 | 0.227501  |
| N O                                      | H O | 2.542556  | -4.022703 | -0.215961 |
| C O                                      | H O | 5.568453  | -0.147084 | 0.646482  |
| C O                                      | H O | -2.542935 | -4.022467 | -0.215590 |



H O -4.949245 -4.381414 0.227885  
H O -6.455286 -2.461914 0.652217  
H O -5.568564 -0.146451 0.646103  
H O 0.000461 4.889634 1.472504  
H O 0.000798 5.922071 -0.754851  
H O 0.000682 4.507209 -2.817049  
H O -0.000317 2.187640 3.902281  
H O 0.896043 3.556263 3.195540  
H O -0.896012 3.556539 3.195219

SCF Done: E(RB3LYP) = -  
2309.59667376

Sum of electronic and zero-point  
Energies= -2309.288652

Sum of electronic and thermal Energies=  
-2309.264737

Sum of electronic and thermal  
Enthalpies= -2309.263793

Sum of electronic and thermal Free  
Energies= -2309.344320

Conformer II:

#p opt freq=noraman rb3lyp/6-311++g(d,p)  
pop=full

0 1  
C O -5.386928 -2.368038 -0.374584  
C O -4.536273 -3.347341 0.159226  
C O -3.189927 -3.084236 0.370110  
C O -2.671510 -1.821816 0.039687  
C O -3.542832 -0.849987 -0.505865  
C O -4.896203 -1.110186 -0.710104  
C O -1.335306 -1.312595 0.197914  
C O -1.194528 -0.028979 -0.229696  
S O -2.694400 0.647618 -0.874223  
S O -0.000015 -2.243221 0.932065  
C O 1.335286 -1.312597 0.197931  
C O 1.194521 -0.028971 -0.229669  
N O 0.000008 0.697157 -0.289999  
C O 2.671453 -1.821865 0.039618  
C O 3.542788 -0.850054 -0.506002

S O 2.694349 0.647580 -0.874285  
C O 3.189871 -3.084262 0.370077  
C O 4.536223 -3.347413 0.159101  
C O 5.386855 -2.368150 -0.374782  
C O 4.896116 -1.110282 -0.710290  
C O 0.000013 2.115477 -0.136158  
C O 0.000182 2.700551 1.150549  
C O 0.000188 4.091754 1.281705  
C O 0.000051 4.893568 0.140393

C O -0.000102 4.342092 -1.134734  
C O -0.000128 2.958545 -1.243851

F O -0.000253 2.405361 -2.472199

O O 0.000266 1.826266 2.179152  
C O 0.000265 2.326821 3.513923

H O -6.435672 -2.591723 -0.531711  
H O -4.936459 -4.322991 0.410245

H O -2.537291 -3.846812 0.779800  
H O -5.551279 -0.354001 -1.127087

H O 2.537270 -3.846799 0.779895  
H O 4.936407 -4.323033 0.410237

H O 6.435559 -2.591867 -0.532069  
H O 5.551204 -0.354104 -1.127272

H O 0.000293 4.553096 2.259216  
H O 0.000060 5.971408 0.253468

H O -0.000205 4.950761 -2.029113  
H O 0.000240 1.447017 4.153829

H O 0.896209 2.923346 3.711623  
H O -0.895652 2.923390 3.711610

SCF Done: E(RB3LYP) = -  
2309.59730724

Sum of electronic and zero-point  
Energies= -2309.289199

Sum of electronic and thermal Energies=  
-2309.265343

Sum of electronic and thermal  
Enthalpies= -2309.264399

Sum of electronic and thermal Free  
Energies= -2309.344678

### 6.1.17.2 Minimum geometry of native BBTT under IEFPCM variation of PCM

(B3LYP/6-311++G\*\*, IEFPCM CH<sub>2</sub>Cl<sub>2</sub>)

```

Conformer I:
#p opt=verytight Int=UltraFine
freq=noraman rb3lyp/6-311++g(d,p) pop=f
ull scrf=(iefpcm,solvent=dichloromethane)
Geom=check guess=read
0 1
C 0 5.410825 -2.288299 0.452327
C 0 4.557538 -3.375516 0.208950
C 0 3.203878 -3.181172 -0.034092
C 0 2.680827 -1.876863 -0.030649
C 0 3.556786 -0.794465 0.221835
C 0 4.916084 -0.986736 0.459407
C 0 1.336298 -1.429925 -0.277736
C 0 1.194642 -0.077927 -0.192204
S 0 2.704668 0.747576 0.198249
S 0 0.000001 -2.524778 -0.739101
C 0 -1.336297 -1.429926 -0.277736
C 0 -1.194641 -0.077927 -0.192204
N 0 -0.000000 0.635795 -0.323947
C 0 -2.680826 -1.876864 -0.030649
C 0 -3.556786 -0.794466 0.221835
S 0 -2.704668 0.747575 0.198249
C 0 -3.203877 -3.181173 -0.034092
C 0 -4.557537 -3.375518 0.208949
C 0 -5.410824 -2.288301 0.452327
C 0 -4.916083 -0.986738 0.459407
C 0 -0.000000 2.057139 -0.440804
C 0 -0.000001 2.888957 0.702454
C 0 -0.000001 4.279003 0.542073
C 0 -0.000001 4.830122 -0.737647
C 0 -0.000001 4.030743 -1.877302
C 0 -0.000000 2.658020 -1.698200
F 0 0.000000 1.854704 -2.784236
O 0 -0.000001 2.249440 1.891223
C 0 -0.000001 3.025034 3.096514
H 0 6.464545 -2.459939 0.638082
H 0 4.961108 -4.381542 0.209273
H 0 2.552788 -4.027654 -0.220987
H 0 5.572961 -0.145994 0.649335
H 0 -2.552787 -4.027655 -0.220987
H 0 -4.961107 -4.381543 0.209273
H 0 -6.464544 -2.459942 0.638082
H 0 -5.572961 -0.145996 0.649334
H 0 -0.000002 4.931010 1.403697
H 0 -0.000001 5.908145 -0.846023
H 0 -0.000001 4.447806 -2.875546
H 0 -0.000001 2.300260 3.907136
H 0 0.895880 3.647729 3.160191
H 0 -0.895883 3.647729 3.160190
SCF Done: E(RB3LYP) = -
2309.60707001
Sum of electronic and zero-point
Energies= -2309.299163
Sum of electronic and thermal Energies=
-2309.275262
Sum of electronic and thermal
Enthalpies= -2309.274318
Sum of electronic and thermal Free
Energies= -2309.354407
Conformer II:
#p opt=verytight Int=UltraFine
freq=noraman rb3lyp/6-311++g(d,p) pop=f
ull scrf=(iefpcm,solvent=dichloromethane)
Geom=check guess=read
0 1
C 0 -5.405615 -2.353616 -0.353258
C 0 -4.553049 -3.362986 0.119636
C 0 -3.200955 -3.118670 0.322800
C 0 -2.679231 -1.843999 0.044922
C 0 -3.553708 -0.841654 -0.437945
C 0 -4.912008 -1.082424 -0.634368
C 0 -1.336898 -1.351112 0.203525

```

|     |           |           |           |                                         |           |           |           |
|-----|-----------|-----------|-----------|-----------------------------------------|-----------|-----------|-----------|
| C O | -1.194673 | -0.048098 | -0.164131 | H O                                     | -6.458072 | -2.562899 | -0.504408 |
| S O | -2.702100 | 0.671407  | -0.738662 | H O                                     | -4.955889 | -4.346947 | 0.330503  |
| S O | 0.000000  | -2.326443 | 0.879961  | H O                                     | -2.549943 | -3.904728 | 0.688439  |
| C O | 1.336898  | -1.351112 | 0.203525  | H O                                     | -5.568638 | -0.302823 | -1.002271 |
| C O | 1.194672  | -0.048098 | -0.164131 | H O                                     | 2.549943  | -3.904728 | 0.688439  |
| N O | 0.000000  | 0.675220  | -0.205700 | H O                                     | 4.955889  | -4.346947 | 0.330502  |
| C O | 2.679231  | -1.843999 | 0.044922  | H O                                     | 6.458072  | -2.562899 | -0.504408 |
| C O | 3.553708  | -0.841654 | -0.437945 | H O                                     | 5.568638  | -0.302823 | -1.002271 |
| S O | 2.702100  | 0.671407  | -0.738662 | H O                                     | 0.000000  | 4.709770  | 2.050332  |
| C O | 3.200955  | -3.118670 | 0.322800  | H O                                     | 0.000000  | 5.972430  | -0.053833 |
| C O | 4.553049  | -3.362986 | 0.119636  | H O                                     | -0.000000 | 4.789169  | -2.255661 |
| C O | 5.405615  | -2.353616 | -0.353258 | H O                                     | -0.000000 | 1.769635  | 4.183913  |
| C O | 4.912008  | -1.082424 | -0.634368 | H O                                     | 0.895821  | 3.204012  | 3.620679  |
| C O | 0.000000  | 2.101082  | -0.154721 | H O                                     | -0.895820 | 3.204013  | 3.620679  |
| C O | 0.000000  | 2.777607  | 1.086592  | SCF Done: E(RB3LYP) = -                 |           |           |           |
| C O | 0.000000  | 4.175613  | 1.110920  | 2309.60741440                           |           |           |           |
| C O | 0.000000  | 4.889469  | -0.086798 | Sum of electronic and zero-point        |           |           |           |
| C O | -0.000000 | 4.245875  | -1.320172 | Energies=                               |           |           |           |
| C O | -0.000000 | 2.860303  | -1.322630 | -2309.299410                            |           |           |           |
| F O | -0.000000 | 2.208559  | -2.507987 | Sum of electronic and thermal Energies= |           |           |           |
| O O | 0.000000  | 1.985194  | 2.178758  | -2309.275542                            |           |           |           |
| C O | 0.000000  | 2.594953  | 3.475935  | Sum of electronic and thermal           |           |           |           |
|     |           |           |           | Enthalpies=                             |           |           |           |
|     |           |           |           | -2309.274598                            |           |           |           |
|     |           |           |           | Sum of electronic and thermal Free      |           |           |           |
|     |           |           |           | Energies=                               |           |           |           |
|     |           |           |           | -2309.354792                            |           |           |           |

### 6.1.17.3 Minimum geometry of native BBTT under SMD variation of PCM (B3LYP/6-311++G\*\*,

#### SMD CH<sub>2</sub>Cl<sub>2</sub>)

|                                         |     |           |           |           |
|-----------------------------------------|-----|-----------|-----------|-----------|
| Conformer I:                            | C O | 1.194549  | -0.080212 | -0.189535 |
| #p opt=verytight Int=UltraFine          | S O | 2.708325  | 0.749690  | 0.178938  |
| freq=noraman rb3lyp/6-311++g(d,p) pop=f | S O | -0.000001 | -2.533904 | -0.708413 |
| ull scrf=(SMD,solvent=dichloromethane)  | C O | -1.337958 | -1.432734 | -0.264422 |
| geom=check                              | C O | -1.194550 | -0.080211 | -0.189535 |
| 0 1                                     | N O | 0.000000  | 0.632919  | -0.321041 |
| C O                                     | C O | -2.685615 | -1.877053 | -0.026618 |
| C O                                     | C O | -3.562996 | -0.791629 | 0.207647  |
| C O                                     | S O | -2.708325 | 0.749691  | 0.178938  |
| C O                                     | C O | -3.211836 | -3.180564 | -0.024200 |
| C O                                     | C O | -4.568330 | -3.369386 | 0.208137  |
| C O                                     | C O | -5.421863 | -2.278687 | 0.434754  |
| C O                                     |     |           |           |           |
| C O                                     |     |           |           |           |
| C O                                     |     |           |           |           |
| C O                                     |     |           |           |           |
| C O                                     |     |           |           |           |
| C O                                     |     |           |           |           |
| C O                                     |     |           |           |           |
| C O                                     |     |           |           |           |
| C O                                     |     |           |           |           |

|                                          |           |           |           |     |           |           |           |
|------------------------------------------|-----------|-----------|-----------|-----|-----------|-----------|-----------|
| C 0                                      | -4.924727 | -0.977929 | 0.435310  | C 0 | -5.426889 | -2.323454 | -0.327277 |
| C 0                                      | 0.000000  | 2.055225  | -0.435467 | C 0 | -4.577012 | -3.338567 | 0.138311  |
| C 0                                      | 0.000001  | 2.883981  | 0.710510  | C 0 | -3.222006 | -3.103203 | 0.333132  |
| C 0                                      | 0.000001  | 4.274735  | 0.552485  | C 0 | -2.694288 | -1.831027 | 0.053870  |
| C 0                                      | 0.000001  | 4.827876  | -0.726341 | C 0 | -3.566593 | -0.823603 | -0.422296 |
| C 0                                      | 0.000000  | 4.031241  | -1.868829 | C 0 | -4.927808 | -1.054778 | -0.610432 |
| C 0                                      | 0.000000  | 2.659192  | -1.691302 | C 0 | -1.348357 | -1.344519 | 0.206031  |
| F 0                                      | -0.000000 | 1.855002  | -2.779771 | C 0 | -1.199566 | -0.042013 | -0.160915 |
| O 0                                      | 0.000001  | 2.242148  | 1.896033  | S 0 | -2.707248 | 0.685300  | -0.727842 |
| C 0                                      | 0.000002  | 3.015266  | 3.104962  | S 0 | -0.013257 | -2.325380 | 0.880010  |
| H 0                                      | 6.477747  | -2.446877 | 0.612869  | C 0 | 1.326914  | -1.358592 | 0.195777  |
| H 0                                      | 4.973936  | -4.374869 | 0.213018  | C 0 | 1.188999  | -0.054628 | -0.169970 |
| H 0                                      | 2.563991  | -4.032539 | -0.198785 | N 0 | -0.001506 | 0.675315  | -0.204182 |
| H 0                                      | 5.581672  | -0.134038 | 0.612830  | C 0 | 2.666240  | -1.859302 | 0.032291  |
| H 0                                      | -2.563992 | -4.032539 | -0.198784 | C 0 | 3.545252  | -0.861197 | -0.451200 |
| H 0                                      | -4.973937 | -4.374868 | 0.213019  | S 0 | 2.699180  | 0.656844  | -0.750153 |
| H 0                                      | -6.477747 | -2.446875 | 0.612869  | C 0 | 3.182428  | -3.137005 | 0.307563  |
| H 0                                      | -5.581672 | -0.134036 | 0.612830  | C 0 | 4.533117  | -3.387134 | 0.101586  |
| H 0                                      | 0.000001  | 4.923449  | 1.417316  | C 0 | 5.389957  | -2.381227 | -0.371123 |
| H 0                                      | 0.000001  | 5.906420  | -0.832965 | C 0 | 4.902297  | -1.107205 | -0.650371 |
| H 0                                      | -0.000000 | 4.450578  | -2.866685 | C 0 | 0.006521  | 2.102028  | -0.153696 |
| H 0                                      | 0.000002  | 2.286023  | 3.913082  | C 0 | 0.035415  | 2.779094  | 1.087610  |
| H 0                                      | 0.897033  | 3.636592  | 3.172988  | C 0 | 0.038819  | 4.177570  | 1.109115  |
| H 0                                      | -0.897029 | 3.636593  | 3.172989  | C 0 | 0.016474  | 4.889396  | -0.089636 |
| SCF Done: E(RB3LYP) = -                  |           |           |           | C 0 | -0.008964 | 4.245048  | -1.322933 |
| 2309.62956682                            |           |           |           | C 0 | -0.013116 | 2.860362  | -1.322029 |
| Sum of electronic and zero-point         |           |           |           | F 0 | -0.036315 | 2.204424  | -2.507579 |
| Energies= -2309.321684                   |           |           |           | O 0 | 0.058490  | 1.987312  | 2.178317  |
| Sum of electronic and thermal Energies=  |           |           |           | C 0 | 0.130676  | 2.596027  | 3.476237  |
| -2309.297892                             |           |           |           | H 0 | -6.481879 | -2.526486 | -0.471404 |
| Sum of electronic and thermal            |           |           |           | H 0 | -4.984279 | -4.320718 | 0.350706  |
| Enthalpies= -2309.296948                 |           |           |           | H 0 | -2.575526 | -3.895615 | 0.693780  |
| Sum of electronic and thermal Free       |           |           |           | H 0 | -5.583038 | -0.270952 | -0.973196 |
| Energies= -2309.376181                   |           |           |           | H 0 | 2.530298  | -3.922201 | 0.673770  |
| Conformer II:                            |           |           |           | H 0 | 4.931366  | -4.373687 | 0.310724  |
| #p opt freq=noraman rb3lyp/6-311++g(d,p) |           |           |           | H 0 | 6.441474  | -2.595625 | -0.523960 |
| scrf=(smd,solvent=dichloromet            |           |           |           | H 0 | 5.563096  | -0.330647 | -1.018564 |
| hane) pop=full                           |           |           |           |     |           |           |           |
| 0 1                                      |           |           |           |     |           |           |           |

H O 0.057520 4.713721 2.047692  
H O 0.019281 5.972880 -0.058013  
H O -0.025176 4.787196 -2.259516  
H O 0.147152 1.769007 4.183642  
H O 1.045162 3.185931 3.579997  
H O -0.745856 3.221021 3.665176  
SCF Done: E(RB3LYP) = -  
2309.63000118

Sum of electronic and zero-point  
Energies= -2309.322050  
Sum of electronic and thermal Energies=  
-2309.298246  
Sum of electronic and thermal  
Enthalpies= -2309.297302  
Sum of electronic and thermal Free  
Energies= -2309.376708

6.1.17.4 Minimum geometry of radical cation of BBTT in gas phase (B3LYP/6-311++G\*\*)

#p opt freq=noraman ub3lyp/6-  
311++g(d,p) pop=full  
0 1  
C O 5.479918 -2.210594 0.023704  
C O 4.627610 -3.321004 0.125558  
C O 3.251661 -3.162378 0.120589  
C O 2.711763 -1.869032 0.012210  
C O 3.586734 -0.764154 -0.089141  
C O 4.968915 -0.921197 -0.084917  
C O 1.337189 -1.452074 -0.014905  
C O 1.193561 -0.077178 -0.132879  
S O 2.719032 0.769540 -0.217058  
S O -0.000647 -2.566728 0.087656  
C O -1.338046 -1.451583 -0.015178  
C O -1.193867 -0.076773 -0.133341  
N O -0.000042 0.604195 -0.189922  
C O -2.712788 -1.867966 0.012674  
C O -3.587357 -0.762753 -0.088421  
S O -2.719095 0.770645 -0.216575  
C O -3.253160 -3.161043 0.121894  
C O -4.629173 -3.319076 0.127959  
C O -5.481076 -2.208358 0.026083  
C O -4.969598 -0.919229 -0.083474  
C O 0.000190 2.040551 -0.291847  
C O 0.001860 2.831883 0.876135  
C O 0.002028 4.222970 0.740971  
C O 0.000673 4.796911 -0.529386

C O -0.000893 4.025472 -1.688763  
C O -0.001114 2.650057 -1.545633  
F O -0.002555 1.857091 -2.629773  
O O 0.003157 2.152374 2.038387  
C O 0.004582 2.884907 3.273682  
H O 6.553197 -2.357087 0.028514  
H O 5.052204 -4.313829 0.208174  
H O 2.602782 -4.027281 0.198855  
H O 5.631625 -0.068215 -0.164596  
H O -2.604593 -4.026209 0.199850  
H O -5.054135 -4.311672 0.211441  
H O -6.554413 -2.354407 0.031495  
H O -5.631994 -0.066034 -0.163476  
H O 0.003242 4.858591 1.614920  
H O 0.000820 5.876861 -0.615474  
H O -0.001950 4.464917 -2.677199  
H O 0.005766 2.130483 4.056398  
H O 0.901573 3.503282 3.356649  
H O -0.892394 3.502971 3.358939  
SCF Done: E(UB3LYP) = -  
2309.38149613  
Sum of electronic and zero-point  
Energies= -2309.072621  
Sum of electronic and thermal Energies=  
-2309.048876  
Sum of electronic and thermal  
Enthalpies= -2309.047932  
Sum of electronic and thermal Free  
Energies= -2309.127595

### 6.1.17.5 Minimum geometry of radical cation of BBTT under SMD variation of PCM

(B3LYP/6-311++G\*\*, SMD CH<sub>2</sub>Cl<sub>2</sub>)

```
#p opt freq=noraman ub3lyp/6-
311++g(d,p) pop=full
scrf=(SMD,solvent=di
chloromethane)
0 1
C 0 5.478748 -2.211451 0.059480
C 0 4.624682 -3.323317 0.130228
C 0 3.248093 -3.165443 0.105066
C 0 2.711169 -1.869932 0.007233
C 0 3.587591 -0.764134 -0.065666
C 0 4.970073 -0.919711 -0.039494
C 0 1.336611 -1.453029 -0.033060
C 0 1.192405 -0.078147 -0.135157
S 0 2.720027 0.771655 -0.185275
S 0 -0.000213 -2.570744 0.036228
C 0 -1.336894 -1.452863 -0.033363
C 0 -1.192471 -0.078025 -0.135562
N 0 0.000008 0.603408 -0.195944
C 0 -2.711515 -1.869559 0.007298
C 0 -3.587810 -0.763677 -0.065661
S 0 -2.720020 0.772057 -0.185666
C 0 -3.248601 -3.164963 0.105682
C 0 -4.625206 -3.322630 0.131327
C 0 -5.479140 -2.210680 0.060350
C 0 -4.970303 -0.919047 -0.039244
C 0 0.000101 2.039578 -0.303471
C 0 0.000615 2.836035 0.861530
C 0 0.000756 4.227326 0.719526
C 0 0.000419 4.794867 -0.552655
C 0 -0.000100 4.018496 -1.710533
C 0 -0.000256 2.646074 -1.558511
F 0 -0.000730 1.844752 -2.645341
O 0 0.000744 2.164855 2.025999
C 0 0.001158 2.908812 3.259247
H 0 6.552130 -2.358001 0.081237
H 0 5.047514 -4.317910 0.205397
H 0 2.599055 -4.032183 0.159598
H 0 5.634573 -0.065710 -0.093824
H 0 -2.599681 -4.031788 0.160269
H 0 -5.048152 -4.317132 0.207087
H 0 -6.552537 -2.357081 0.082362
H 0 -5.634693 -0.064984 -0.093900
H 0 0.001049 4.864839 1.592510
H 0 0.000515 5.874574 -0.643751
H 0 -0.000379 4.454873 -2.700822
H 0 0.001293 2.157414 4.046324
H 0 0.898914 3.526278 3.338345
H 0 -0.896499 3.526353 3.338724
SCF Done: E(UB3LYP) = -
2309.45743929
Sum of electronic and zero-point
Energies= -2309.148706
Sum of electronic and thermal Energies=
-2309.125065
Sum of electronic and thermal
Enthalpies= -2309.124121
Sum of electronic and thermal Free
Energies= -2309.203167
```

### 6.1.18 *anti-anti-N-ortho,ortho'*-dimethylphenyl-BBTT 3i

#### 6.1.18.1 Minimum geometry of native BBTT in gas phase (B3LYP/6-311G\*\*) + energies of

N-inversion relaxed geometry PES scan

```
#p opt freq=noraman rb3lyp/6-311g**
scrf=(iefpcm,solvent=dichlorometha
ne) pop=full guess=read geom=check
0 1
```

|     |           |           |           |                                         |           |          |           |
|-----|-----------|-----------|-----------|-----------------------------------------|-----------|----------|-----------|
| C 0 | -5.480265 | -2.121848 | -0.198220 | H 0                                     | 0.000004  | 6.046564 | 0.112911  |
| C 0 | -4.619792 | -3.220001 | -0.054706 | H 0                                     | -0.000001 | 4.792481 | 2.244019  |
| C 0 | -3.246983 | -3.043337 | 0.051912  | H 0                                     | 0.879161  | 1.447438 | 2.689450  |
| C 0 | -2.711305 | -1.744419 | 0.011789  | H 0                                     | 0.000001  | 2.776003 | 3.456331  |
| C 0 | -3.596428 | -0.650696 | -0.135512 | H 0                                     | -0.879159 | 1.447437 | 2.689452  |
| C 0 | -4.973740 | -0.826027 | -0.238756 | H 0                                     | 0.000008  | 2.867896 | -3.303233 |
| C 0 | -1.343238 | -1.318241 | 0.115653  | H 0                                     | 0.879602  | 1.516917 | -2.580594 |
| C 0 | -1.193973 | 0.033732  | 0.034444  | H 0                                     | -0.879595 | 1.516923 | -2.580596 |
| S 0 | -2.728191 | 0.882653  | -0.168638 | SCF Done: E(RB3LYP) = -                 |           |          |           |
| S 0 | -0.000002 | -2.469155 | 0.397646  | 2174.42480481                           |           |          |           |
| C 0 | 1.343238  | -1.318240 | 0.115678  | Sum of electronic and zero-point        |           |          |           |
| C 0 | 1.193974  | 0.033733  | 0.034469  | Energies= -2174.086279                  |           |          |           |
| N 0 | 0.000000  | 0.752568  | 0.062260  | Sum of electronic and thermal Energies= |           |          |           |
| C 0 | 2.711303  | -1.744421 | 0.011804  | -2174.062331                            |           |          |           |
| C 0 | 3.596428  | -0.650699 | -0.135502 | Sum of electronic and thermal           |           |          |           |
| S 0 | 2.728198  | 0.882655  | -0.168558 | Enthalpies= -2174.061387                |           |          |           |
| C 0 | 3.246977  | -3.043342 | 0.051901  | Sum of electronic and thermal Free      |           |          |           |
| C 0 | 4.619783  | -3.220010 | -0.054744 | Energies= -2174.141631                  |           |          |           |
| C 0 | 5.480257  | -2.121858 | -0.198263 | Relaxed PES Scan via:                   |           |          |           |
| C 0 | 4.973737  | -0.826036 | -0.238778 | #p rb3lyp/6-311G** opt=ModRedundant     |           |          |           |
| C 0 | 0.000000  | 2.196733  | 0.070082  | nosymm                                  |           |          |           |
| C 0 | 0.000005  | 2.886935  | -1.155302 | scrf=(iefpcm,solvent=dichloromethane)   |           |          |           |
| C 0 | 0.000005  | 4.284202  | -1.113441 | with D 8 13 21 22 S 180 1.0             |           |          |           |
| C 0 | 0.000003  | 4.962437  | 0.101172  | HF=-2174.4248039,-2174.4248014,-        |           |          |           |
| C 0 | -0.000001 | 4.257451  | 1.301015  | 2174.4247                               |           |          |           |
| C 0 | -0.000003 | 2.860587  | 1.309238  | 937,-2174.4247806,-2174.424762,-        |           |          |           |
| C 0 | 0.000000  | 2.092330  | 2.606762  | 2174.4247323,-2174.4247079,-            |           |          |           |
| C 0 | 0.000005  | 2.157192  | -2.476136 | 2174.42466                              |           |          |           |
| H 0 | -6.549146 | -2.280114 | -0.278663 | 65,-2174.4246301,-2174.4245761,-        |           |          |           |
| H 0 | -5.032776 | -4.221701 | -0.025826 | 2174.4245266,-2174.4244643,-            |           |          |           |
| H 0 | -2.591684 | -3.899967 | 0.161892  | 2174.42438                              |           |          |           |
| H 0 | -5.636366 | 0.024117  | -0.350316 | 89,-2174.4243177,-2174.4242265,-        |           |          |           |
| H 0 | 2.591676  | -3.899971 | 0.161879  | 2174.4241396,-2174.4240312,-            |           |          |           |
| H 0 | 5.032764  | -4.221712 | -0.025883 | 2174.42392                              |           |          |           |
| H 0 | 6.549136  | -2.280127 | -0.278722 | 7,-2174.4238067,-2174.4236765,-         |           |          |           |
| H 0 | 5.636364  | 0.024108  | -0.350331 | 2174.4235361,-2174.423385,-             |           |          |           |
| H 0 | 0.000008  | 4.840315  | -2.044161 | 2174.4232229                            |           |          |           |
|     |           |           |           | ,-2174.4230497,-2174.4228652,-          |           |          |           |
|     |           |           |           | 2174.4226692,-2174.4224613,-            |           |          |           |
|     |           |           |           | 2174.4222411                            |           |          |           |
|     |           |           |           | ,-2174.4220082,-2174.4217619,-          |           |          |           |
|     |           |           |           | 2174.4215018,-2174.4212274,-            |           |          |           |
|     |           |           |           | 2174.4209383                            |           |          |           |

, -2174.420634, -2174.4203143, -  
2174.419979, -2174.4196277, -  
2174.4192605, -  
2174.418877, -2174.4184772, -  
2174.41867, -2174.4182828, -  
2174.4178942, -217  
4.4174852, -2174.4170618, -  
2174.4166241, -2174.4161722, -  
2174.4157061, -217  
4.4152261, -2174.4147323, -  
2174.4142249, -2174.4137042, -  
2174.4131702, -217  
4.4126229, -2174.4120621, -  
2174.4114879, -2174.4109001, -  
2174.4102989, -217  
4.4096847, -2174.4090582, -2174.40842, -  
2174.4077711, -2174.4071122, -2174.  
4064443, -2174.4057685, -2174.405086, -  
2174.4043976, -2174.4037045, -2174.4  
030081, -2174.4023097, -2174.4016117, -  
2174.4009158, -2174.4002229, -2174.3  
995355, -2174.3988556, -2174.3981853, -  
2174.3975247, -2174.3968731, -2174.3  
962332, -2174.3956109, -2174.395016, -  
2174.3944564, -2174.3939272, -2174.39  
34219, -2174.392938, -2174.392477, -  
2174.3920403, -2174.3916264, -2174.3912  
311, -2174.3908507, -2174.390486, -  
2174.3901402, -2174.3898146, -  
2174.38950  
83, -2174.3892194, -2174.3889466, -  
2174.3886892, -2174.3884457, -  
2174.38821  
49, -2174.3879977, -2174.3877962, -  
2174.3876104, -2174.3874405, -  
2174.38728  
55, -2174.387148, -2174.3870351, -  
2174.386945, -2174.3868764, -  
2174.3868225  
, -2174.3867781, -2174.3867416, -  
2174.3867138, -2174.3866934, -  
2174.3866783  
, -2174.3866674, -2174.3866608, -  
2174.3866591, -2174.3866632, -  
2174.3866722  
, -2174.3866863, -2174.3867097, -  
2174.3867476, -2174.4093738, -  
2174.4100428  
, -2174.4106946, -2174.4113291, -  
2174.4119465, -2174.4125469, -  
2174.4131302  
, -2174.4136967, -2174.4142465, -  
2174.4147796, -2174.4152963, -  
2174.4157966  
, -2174.4162805, -2174.4167484, -  
2174.4172001, -2174.4176359, -  
2174.4180559  
, -2174.4184603, -2174.4188493, -  
2174.4192232, -2174.4195822, -  
2174.4199266  
, -2174.4202565, -2174.4205722, -  
2174.4208739, -2174.4211618, -  
2174.4214362  
, -2174.4216974, -2174.4219456, -  
2174.4221811, -2174.4224041, -  
2174.4226149  
, -2174.4228136, -2174.4230007, -  
2174.4231762, -2174.4233405, -  
2174.4234939  
, -2174.4236368, -2174.4237693, -  
2174.4238919, -2174.4240048, -  
2174.4241084  
, -2174.4242032, -2174.4242896, -  
2174.4243681, -2174.4244421, -  
2174.4245075  
, -2174.4245653, -2174.4246159, -  
2174.4246598, -2174.4246974, -  
2174.4247296  
, -2174.4247567, -2174.4247784, -  
2174.4247944, -2174.4248044, -  
2174.4248087  
, -2174.4248072, -2174.4248001

#### 6.1.18.2 Minimum geometry of native BBTT in gas phase (B3LYP/6-311++G\*\*)

|                                          |     |           |           |           |
|------------------------------------------|-----|-----------|-----------|-----------|
| #p opt freq=noraman rb3lyp/6-311++g(d,p) | C 0 | -5.468830 | -2.138534 | -0.235249 |
| pop=full                                 | C 0 | -4.606617 | -3.229494 | -0.054426 |
| 0 1                                      |     |           |           |           |



|     |           |           |           |                                         |           |           |           |
|-----|-----------|-----------|-----------|-----------------------------------------|-----------|-----------|-----------|
| C 0 | -3.236673 | -3.044461 | 0.073060  | H 0                                     | -6.535610 | -2.303089 | -0.331379 |
| C 0 | -2.705299 | -1.745032 | 0.015842  | H 0                                     | -5.016113 | -4.232303 | -0.012679 |
| C 0 | -3.591275 | -0.658644 | -0.171376 | H 0                                     | -2.578456 | -3.894883 | 0.210139  |
| C 0 | -4.965746 | -0.841984 | -0.294426 | H 0                                     | -5.629658 | 0.003082  | -0.435768 |
| C 0 | -1.340418 | -1.312058 | 0.138353  | H 0                                     | 2.578601  | -3.894809 | 0.209813  |
| C 0 | -1.194374 | 0.038393  | 0.029078  | H 0                                     | 5.016300  | -4.232108 | -0.012720 |
| S 0 | -2.728794 | 0.876136  | -0.222887 | H 0                                     | 6.535762  | -2.302814 | -0.331054 |
| S 0 | 0.000081  | -2.446547 | 0.476664  | H 0                                     | 5.629730  | 0.003339  | -0.435360 |
| C 0 | 1.340468  | -1.312011 | 0.138087  | H 0                                     | 0.000280  | 4.879607  | -1.987969 |
| C 0 | 1.194409  | 0.038448  | 0.028896  | H 0                                     | -0.000201 | 6.053242  | 0.187088  |
| N 0 | -0.000012 | 0.759822  | 0.055554  | H 0                                     | -0.000636 | 4.765770  | 2.298622  |
| C 0 | 2.705383  | -1.744931 | 0.015757  | H 0                                     | 0.879065  | 1.413514  | 2.689733  |
| C 0 | 3.591347  | -0.658493 | -0.171222 | H 0                                     | -0.000451 | 2.729278  | 3.479282  |
| S 0 | 2.728806  | 0.876251  | -0.222794 | H 0                                     | -0.879422 | 1.413197  | 2.689634  |
| C 0 | 3.236803  | -3.044347 | 0.072905  | H 0                                     | -0.000029 | 2.927697  | -3.277355 |
| C 0 | 4.606768  | -3.229311 | -0.054422 | H 0                                     | 0.880348  | 1.565960  | -2.575574 |
| C 0 | 5.468966  | -2.138301 | -0.235035 | H 0                                     | -0.879913 | 1.565647  | -2.575432 |
| C 0 | 4.965841  | -0.841768 | -0.294150 | SCF Done: E(RB3LYP) = -                 |           |           |           |
| C 0 | -0.000047 | 2.202564  | 0.084829  | 2174.43238922                           |           |           |           |
| C 0 | 0.000082  | 2.912516  | -1.128943 | Sum of electronic and zero-point        |           |           |           |
| C 0 | 0.000082  | 4.309115  | -1.065670 | Energies= -2174.093791                  |           |           |           |
| C 0 | -0.000168 | 4.969173  | 0.158703  | Sum of electronic and thermal Energies= |           |           |           |
| C 0 | -0.000385 | 4.245293  | 1.347147  | -2174.069890                            |           |           |           |
| C 0 | -0.000287 | 2.848590  | 1.333208  | Sum of electronic and thermal           |           |           |           |
| C 0 | -0.000295 | 2.059539  | 2.618002  | Enthalpies= -2174.068946                |           |           |           |
| C 0 | 0.000097  | 2.203651  | -2.461215 | Sum of electronic and thermal Free      |           |           |           |
|     |           |           |           | Energies= -2174.148934                  |           |           |           |

### 6.1.18.3 Minimum geometry of native BBTT under IEFPCM variation of PCM

(B3LYP/6-311++G\*\*, IEFPCM CH<sub>2</sub>Cl<sub>2</sub>)

|                                          |           |           |           |           |           |           |          |
|------------------------------------------|-----------|-----------|-----------|-----------|-----------|-----------|----------|
| #p opt freq=noraman rb3lyp/6-311++g(d,p) | C 0       | -4.977709 | -0.822777 | -0.213935 |           |           |          |
| scrf=(iefpcm,solvent=dichloro            | C 0       | -1.343025 | -1.320302 | 0.104023  |           |           |          |
| methane) pop=full                        | C 0       | -1.193510 | 0.032973  | 0.031380  |           |           |          |
| 0 1                                      | S 0       | -2.730049 | 0.883043  | -0.149602 |           |           |          |
| C 0                                      | -5.485325 | -2.119440 | -0.177291 | S 0       | -0.000015 | -2.477875 | 0.351536 |
| C 0                                      | -4.623886 | -3.219344 | -0.048430 | C 0       | 1.343012  | -1.320308 | 0.104109 |
| C 0                                      | -3.249093 | -3.043957 | 0.047436  | C 0       | 1.193511  | 0.032969  | 0.031471 |
| C 0                                      | -2.713036 | -1.744642 | 0.011436  | N 0       | 0.000001  | 0.752624  | 0.056698 |
| C 0                                      | -3.599056 | -0.649256 | -0.120886 | C 0       | 2.713019  | -1.744661 | 0.011522 |

|     |           |           |           |                                         |           |           |           |
|-----|-----------|-----------|-----------|-----------------------------------------|-----------|-----------|-----------|
| C O | 3.599050  | -0.649282 | -0.120800 | H O                                     | 6.555017  | -2.276566 | -0.249735 |
| S O | 2.730070  | 0.883037  | -0.149333 | H O                                     | 5.640921  | 0.028407  | -0.314145 |
| C O | 3.249059  | -3.043984 | 0.047455  | H O                                     | 0.000211  | 4.837863  | -2.056691 |
| C O | 4.623845  | -3.219387 | -0.048464 | H O                                     | 0.000030  | 6.048301  | 0.098758  |
| C O | 5.485296  | -2.119491 | -0.177324 | H O                                     | -0.000161 | 4.797597  | 2.232499  |
| C O | 4.977695  | -0.822820 | -0.213919 | H O                                     | 0.879263  | 1.454553  | 2.685911  |
| C O | 0.000004  | 2.197287  | 0.062660  | H O                                     | -0.000261 | 2.785623  | 3.448137  |
| C O | 0.000115  | 2.885312  | -1.164026 | H O                                     | -0.879678 | 1.454561  | 2.685776  |
| C O | 0.000123  | 4.283159  | -1.124987 | H O                                     | 0.000299  | 2.863509  | -3.311715 |
| C O | 0.000021  | 4.964018  | 0.088911  | H O                                     | 0.880136  | 1.513403  | -2.587335 |
| C O | -0.000085 | 4.260668  | 1.290431  | H O                                     | -0.879627 | 1.513382  | -2.587482 |
| C O | -0.000093 | 2.863198  | 1.300960  | SCF Done: E(RB3LYP) = -                 |           |           |           |
| C O | -0.000199 | 2.098857  | 2.600858  | 2174.43933315                           |           |           |           |
| C O | 0.000238  | 2.153659  | -2.483677 | Sum of electronic and zero-point        |           |           |           |
| H O | -6.555051 | -2.276503 | -0.249674 | Energies= -2174.101021                  |           |           |           |
| H O | -5.037152 | -4.221099 | -0.022302 | Sum of electronic and thermal Energies= |           |           |           |
| H O | -2.594131 | -3.902329 | 0.146294  | -2174.077064                            |           |           |           |
| H O | -5.640924 | 0.028455  | -0.314189 | Sum of electronic and thermal           |           |           |           |
| H O | 2.594087  | -3.902352 | 0.146293  | Enthalpies= -2174.076119                |           |           |           |
| H O | 5.037099  | -4.221148 | -0.022383 | Sum of electronic and thermal Free      |           |           |           |
|     |           |           |           | Energies= -2174.156320                  |           |           |           |

#### 6.1.18.4 Minimum geometry of native BBT under IEFPCM variation of PCM

(PBE1PBE/6-311++G\*\*, IEFPCM CH<sub>2</sub>Cl<sub>2</sub>)

```
#p opt freq=noraman PBE1PBE/6-
311++g(d,p) scrf=(iefpcm,solvent=dichlor
omethane) pop=full geom=check
guess=read
0 1
```

|     |           |           |           |     |           |           |           |
|-----|-----------|-----------|-----------|-----|-----------|-----------|-----------|
| C O | -5.459858 | -2.088146 | -0.201472 | C O | 1.330292  | -1.321484 | 0.131271  |
| C O | -4.607809 | -3.193149 | -0.090490 | C O | 1.184795  | 0.031360  | 0.089240  |
| C O | -3.236870 | -3.029148 | 0.022096  | N O | -0.000002 | 0.747202  | 0.144755  |
| C O | -2.696530 | -1.735489 | 0.020764  | C O | 2.696492  | -1.735528 | 0.020825  |
| C O | -3.571835 | -0.634676 | -0.092767 | C O | 3.571813  | -0.634726 | -0.092702 |
| C O | -4.947670 | -0.797339 | -0.203297 | S O | 2.702484  | 0.881111  | -0.080852 |
| C O | -1.330327 | -1.321464 | 0.131244  | C O | 3.236816  | -3.029193 | 0.022191  |
| C O | -1.184809 | 0.031379  | 0.089214  | C O | 4.607756  | -3.193211 | -0.090354 |
| S O | -2.702491 | 0.881152  | -0.080842 | C O | 5.459822  | -2.088220 | -0.201330 |
| S O | -0.000029 | -2.472907 | 0.364537  | C O | 4.947648  | -0.797407 | -0.203192 |
|     |           |           |           | C O | 0.000017  | 2.178624  | 0.063355  |
|     |           |           |           | C O | 0.000155  | 2.788538  | -1.199276 |
|     |           |           |           | C O | 0.000171  | 4.182204  | -1.243596 |
|     |           |           |           | C O | 0.000056  | 4.930845  | -0.073696 |
|     |           |           |           | C O | -0.000072 | 4.302539  | 1.165213  |

C O -0.000089 2.911676 1.257397  
 C O -0.000241 2.217923 2.586616  
 C O 0.000326 1.973894 -2.458726  
 H O -6.530624 -2.238016 -0.287661  
 H O -5.027667 -4.193598 -0.091701  
 H O -2.584798 -3.892913 0.106911  
 H O -5.605171 0.061085 -0.290144  
 H O 2.584732 -3.892949 0.107004  
 H O 5.027603 -4.193665 -0.091537  
 H O 6.530588 -2.238104 -0.287489  
 H O 5.605160 0.061008 -0.290043  
 H O 0.000285 4.680768 -2.207931  
 H O 0.000072 6.014878 -0.128086  
 H O -0.000162 4.894421 2.075197

H O 0.879563 1.577201 2.700466  
 H O -0.000322 2.945163 3.400085  
 H O -0.880082 1.577218 2.700273  
 H O 0.000438 2.624720 -3.334416  
 H O 0.881055 1.326938 -2.515321  
 H O -0.880377 1.326925 -2.515553

SCF Done: E(RPBE1PBE) = -2172.83021417

Sum of electronic and zero-point Energies= -2172.488935

Sum of electronic and thermal Energies= -2172.465097

Sum of electronic and thermal Enthalpies= -2172.464153

Sum of electronic and thermal Free Energies= -2172.544270

#### 6.1.18.5 TD-DFT calculation of ground state of native BBTT under IEFPCM variation of PCM

(PBE1PBE/6-311++G\*\*, IEFPCM CH<sub>2</sub>Cl<sub>2</sub>)

#p td=(singlets,nstates=24) PBE1PBE/6-311++g(d,p) scrf=(iefpcm,solvent=dichloromethane) geom=check guess=read

<TDDFT> Excited State 1: Singlet-A  
2.7935 eV 443.83 nm f=0.1620

<TDDFT>HOMO -> LUMO  
97.3%

<TDDFT> Excited State 2: Singlet-A  
3.2920 eV 376.62 nm f=0.0013

<TDDFT>HOMO -> LUMO+1  
96.8%

<TDDFT> Excited State 3: Singlet-A  
3.6630 eV 338.48 nm f=0.0055

<TDDFT>HOMO -> LUMO+2  
83.0%

<TDDFT>HOMO -> LUMO+5 3.6%

<TDDFT>HOMO -> LUMO+7 8.2%

<TDDFT> Excited State 4: Singlet-A  
3.7222 eV 333.10 nm f=0.0120

<TDDFT>HOMO -> LUMO+3  
83.4%

<TDDFT>HOMO -> LUMO+4  
14.2%

<TDDFT> Excited State 5: Singlet-A  
3.7841 eV 327.64 nm f=0.0049

<TDDFT>HOMO -> LUMO+4 6.5%

<TDDFT>HOMO -> LUMO+6  
81.9%

<TDDFT>HOMO -> LUMO+8 6.6%

<TDDFT> Excited State 6: Singlet-A  
3.8470 eV 322.29 nm f=0.0092

<TDDFT>HOMO -> LUMO+2  
14.8%

<TDDFT>HOMO -> LUMO+5  
14.1%

<TDDFT>HOMO -> LUMO+7  
59.1%

<TDDFT>HOMO -> LUMO+10 7.5%

<TDDFT> Excited State 7: Singlet-A  
3.8704 eV 320.34 nm f=0.0018

<TDDFT>HOMO -> LUMO+5  
80.9%

<TDDFT>HOMO -> LUMO+7  
15.3%

<TDDFT> Excited State 8: Singlet-A  
3.9299 eV 315.49 nm f=0.1094

<TDDFT>HOMO -> LUMO+3  
 12.1%  
 <TDDFT>HOMO -> LUMO+4  
 76.0%  
 <TDDFT>HOMO -> LUMO+6 7.7%  
 <TDDFT> Excited State 9: Singlet-A  
 4.1535 eV 298.51 nm f=0.0041  
 <TDDFT>HOMO -> LUMO+6 6.3%  
 <TDDFT>HOMO -> LUMO+8  
 82.8%  
 <TDDFT>HOMO -> LUMO+9 4.0%  
 <TDDFT>HOMO -> LUMO+12 2.5%  
 <TDDFT> Excited State 10: Singlet-A  
 4.5528 eV 272.32 nm f=0.0523  
 <TDDFT>HOMO-2 -> LUMO  
 64.1%  
 <TDDFT>HOMO-1 -> LUMO+4 2.2%  
 <TDDFT>HOMO -> LUMO+10 6.8%  
 <TDDFT>HOMO -> LUMO+13  
 19.1%  
 <TDDFT>HOMO -> LUMO+15 2.0%  
 <TDDFT> Excited State 11: Singlet-A  
 4.5578 eV 272.03 nm f=0.0022  
 <TDDFT>HOMO -> LUMO+8 3.3%  
 <TDDFT>HOMO -> LUMO+9  
 83.4%  
 <TDDFT>HOMO -> LUMO+12 6.1%  
 <TDDFT>HOMO -> LUMO+14 2.9%  
 <TDDFT> Excited State 12: Singlet-A  
 4.6161 eV 268.59 nm f=0.1323  
 <TDDFT>HOMO-2 -> LUMO+3 3.7%  
 <TDDFT>HOMO-1 -> LUMO  
 87.7%  
 <TDDFT> Excited State 13: Singlet-A  
 4.6640 eV 265.83 nm f=0.1047  
 <TDDFT>HOMO-2 -> LUMO 9.9%  
 <TDDFT>HOMO -> LUMO+7  
 11.2%  
 <TDDFT>HOMO -> LUMO+10  
 68.1%  
 <TDDFT>HOMO -> LUMO+15 2.2%  
 <TDDFT>HOMO -> LUMO+21 2.4%

<TDDFT> Excited State 14: Singlet-A  
 4.7828 eV 259.23 nm f=0.4325  
 <TDDFT>HOMO-2 -> LUMO  
 16.7%  
 <TDDFT>HOMO -> LUMO+13  
 61.6%  
 <TDDFT>HOMO -> LUMO+15  
 12.3%  
 <TDDFT> Excited State 15: Singlet-A  
 4.8541 eV 255.42 nm f=0.0011  
 <TDDFT>HOMO -> LUMO+11  
 89.2%  
 <TDDFT>HOMO -> LUMO+17 3.2%  
 <TDDFT> Excited State 16: Singlet-A  
 4.8773 eV 254.21 nm f=0.0017  
 <TDDFT>HOMO -> LUMO+8 4.0%  
 <TDDFT>HOMO -> LUMO+9 3.6%  
 <TDDFT>HOMO -> LUMO+11 2.5%  
 <TDDFT>HOMO -> LUMO+12  
 81.5%  
 <TDDFT>HOMO -> LUMO+20 2.4%  
 <TDDFT> Excited State 17: Singlet-A  
 4.9647 eV 249.73 nm f=0.0008  
 <TDDFT>HOMO-2 -> LUMO+6 5.7%  
 <TDDFT>HOMO-1 -> LUMO+1  
 86.5%  
 <TDDFT>HOMO-1 -> LUMO+7 2.6%  
 <TDDFT> Excited State 18: Singlet-A  
 4.9972 eV 248.11 nm f=0.0008  
 <TDDFT>HOMO-2 -> LUMO+1  
 64.6%  
 <TDDFT>HOMO-1 -> LUMO+6  
 10.5%  
 <TDDFT>HOMO -> LUMO+15 7.7%  
 <TDDFT>HOMO -> LUMO+16 3.5%  
 <TDDFT>HOMO -> LUMO+21 4.3%  
 <TDDFT> Excited State 19: Singlet-A  
 5.0129 eV 247.33 nm f=0.0073  
 <TDDFT>HOMO -> LUMO+9 4.8%  
 <TDDFT>HOMO -> LUMO+14  
 89.2%

|                                                                     |                                                                     |
|---------------------------------------------------------------------|---------------------------------------------------------------------|
| <TDDFT> Excited State 20: Singlet-A<br>5.0156 eV 247.20 nm f=0.0045 | <TDDFT> Excited State 22: Singlet-A<br>5.1267 eV 241.84 nm f=0.0005 |
| <TDDFT>HOMO-2 -> LUMO+1<br>18.2%                                    | <TDDFT>HOMO-1 -> LUMO+6 2.7%                                        |
| <TDDFT>HOMO -> LUMO+10 5.1%                                         | <TDDFT>HOMO -> LUMO+13 7.2%                                         |
| <TDDFT>HOMO -> LUMO+13 6.2%                                         | <TDDFT>HOMO -> LUMO+15 29.9%                                        |
| <TDDFT>HOMO -> LUMO+15 37.7%                                        | <TDDFT>HOMO -> LUMO+16 41.1%                                        |
| <TDDFT>HOMO -> LUMO+16 11.2%                                        | <TDDFT>HOMO -> LUMO+21 13.4%                                        |
| <TDDFT>HOMO -> LUMO+21 13.7%                                        | <TDDFT> Excited State 23: Singlet-A<br>5.2188 eV 237.57 nm f=0.0291 |
| <TDDFT>HOMO -> LUMO+26 2.1%                                         | <TDDFT>HOMO-6 -> LUMO+2 11.6%                                       |
| <TDDFT> Excited State 21: Singlet-A<br>5.0566 eV 245.19 nm f=0.0146 | <TDDFT>HOMO-6 -> LUMO+5 13.8%                                       |
| <TDDFT>HOMO-5 -> LUMO+3 2.2%                                        | <TDDFT>HOMO-4 -> LUMO 3.4%                                          |
| <TDDFT>HOMO-3 -> LUMO 56.4%                                         | <TDDFT>HOMO-4 -> LUMO+1 66.6%                                       |
| <TDDFT>HOMO-2 -> LUMO+4 8.1%                                        | <TDDFT> Excited State 24: Singlet-A<br>5.2681 eV 235.35 nm f=0.0008 |
| <TDDFT>HOMO-1 -> LUMO 2.4%                                          | <TDDFT>HOMO-4 -> LUMO 95.0%                                         |
| <TDDFT>HOMO-1 -> LUMO+2 17.5%                                       | <TDDFT>HOMO-4 -> LUMO+1 2.3%                                        |
| <TDDFT>HOMO-1 -> LUMO+5 3.7%                                        |                                                                     |

#### 6.1.18.6 Minimum geometry of excited state of native BBTT under IEFPCM variation of PCM

(PBE1PBE/6-311++G\*\*, IEFPCM CH<sub>2</sub>Cl<sub>2</sub>)

```

#p opt td=(nstates=4) PBE1PBE/6-
311++g(d,p) freq
scrf=(iefpcm,solvent=dichloromethane)
geom=check guess=read
0 1
C 0 -5.476665 -2.098178 -0.000140
C 0 -4.621098 -3.202985 -0.000139
C 0 -3.244019 -3.046609 -0.000066
C 0 -2.689279 -1.751974 0.000005
C 0 -3.576059 -0.645545 0.000013
C 0 -4.950515 -0.804164 -0.000058
C 0 -1.329607 -1.338613 0.000080
C 0 -1.184450 0.070427 0.000172
S 0 -2.726248 0.902950 0.000106
S 0 0.000000 -2.426154 -0.000032
C 0 1.329607 -1.338612 0.000118
C 0 1.184450 0.070427 0.000205
N 0 -0.000000 0.736423 0.000141
C 0 2.689279 -1.751973 0.000076
C 0 3.576059 -0.645545 0.000091
S 0 2.726248 0.902950 0.000144
C 0 3.244019 -3.046609 0.000022
C 0 4.621098 -3.202984 -0.000017
C 0 5.476665 -2.098177 -0.000009
C 0 4.950515 -0.804163 0.000050
C 0 -0.000000 2.178008 -0.000006
C 0 0.000125 2.838218 -1.233075
C 0 0.000132 4.231986 -1.206722
C 0 -0.000001 4.920468 -0.000309

```

|     |           |           |           |                                         |           |          |           |
|-----|-----------|-----------|-----------|-----------------------------------------|-----------|----------|-----------|
| C O | -0.000134 | 4.232239  | 1.206252  | H O                                     | 0.880886  | 1.433687 | 2.605383  |
| C O | -0.000126 | 2.838478  | 1.232919  | H O                                     | -0.000424 | 2.763872 | 3.372838  |
| C O | -0.000310 | 2.077812  | 2.524785  | H O                                     | -0.881536 | 1.433694 | 2.605141  |
| C O | 0.000312  | 2.077263  | -2.524769 | H O                                     | 0.000425  | 2.763122 | -3.372984 |
| H O | -6.551647 | -2.240539 | -0.000199 | H O                                     | 0.881536  | 1.433123 | -2.604969 |
| H O | -5.040733 | -4.203920 | -0.000193 | H O                                     | -0.880880 | 1.433111 | -2.605213 |
| H O | -2.596431 | -3.917940 | -0.000050 | SCF Done: E(RPBE1PBE) = -               |           |          |           |
| H O | -5.608472 | 0.058551  | -0.000060 | 2172.81924299                           |           |          |           |
| H O | 2.596432  | -3.917939 | 0.000029  | Sum of electronic and zero-point        |           |          |           |
| H O | 5.040734  | -4.203919 | -0.000056 | Energies= -2172.401627                  |           |          |           |
| H O | 6.551648  | -2.240538 | -0.000046 | Sum of electronic and thermal Energies= |           |          |           |
| H O | 5.608472  | 0.058552  | 0.000050  | -2172.376829                            |           |          |           |
| H O | 0.000248  | 4.777429  | -2.144997 | Sum of electronic and thermal           |           |          |           |
| H O | -0.000002 | 6.005685  | -0.000418 | Enthalpies= -2172.375885                |           |          |           |
| H O | -0.000250 | 4.777892  | 2.144405  | Sum of electronic and thermal Free      |           |          |           |
|     |           |           |           | Energies= -2172.458635                  |           |          |           |

#### 6.1.18.7 TD-DFT calculation of excited state of native BBTT under IEFPCM variation of PCM

(PBE1PBE/6-311++G\*\*, IEFPCM CH<sub>2</sub>Cl<sub>2</sub>)

|                                                                                                              |                                                                    |
|--------------------------------------------------------------------------------------------------------------|--------------------------------------------------------------------|
| #p opt td=(nstates=4) PBE1PBE/6-311++g(d,p) freq scrf=(iefpcm,solvent=dichloromethane) geom=check guess=read | <TDDFT> Excited State 3: Singlet-A<br>3.3739 eV 367.48 nm f=0.0023 |
| <TDDFT> Excited State 1: Singlet-A<br>2.1874 eV 566.82 nm f=0.1257                                           | <TDDFT>HOMO -> LUMO+2<br>91.6%                                     |
| <TDDFT>HOMO -> LUMO<br>98.4%                                                                                 | <TDDFT>HOMO -> LUMO+4 7.2%                                         |
| <TDDFT> Excited State 2: Singlet-A<br>2.9780 eV 416.33 nm f=0.0000                                           | <TDDFT> Excited State 4: Singlet-A<br>3.4051 eV 364.11 nm f=0.0106 |
| <TDDFT>HOMO -> LUMO+1<br>98.4%                                                                               | <TDDFT>HOMO -> LUMO+3<br>80.4%                                     |
|                                                                                                              | <TDDFT>HOMO -> LUMO+5<br>17.8%                                     |

#### 6.1.18.8 Minimum geometry of native BBTT under SMD variation of PCM (B3LYP/6-311++G\*\*, SMD CH<sub>2</sub>Cl<sub>2</sub>)

|                                                                                      |           |           |           |           |           |           |           |
|--------------------------------------------------------------------------------------|-----------|-----------|-----------|-----------|-----------|-----------|-----------|
| #p opt freq=noraman rb3lyp/6-311++g(d,p) pop=full scrf=(SMD,solvent=dichloromethane) | C O       | -3.555628 | -0.698261 | -0.309077 |           |           |           |
| 0 1                                                                                  | C O       | -4.914152 | -0.909778 | -0.534109 |           |           |           |
| C O                                                                                  | -5.409622 | -2.205625 | -0.412917 | C O       | -1.337388 | -1.283887 | 0.256996  |
| C O                                                                                  | -4.558129 | -3.266314 | -0.067440 | C O       | -1.191139 | 0.056061  | 0.050881  |
| C O                                                                                  | -3.205260 | -3.051747 | 0.164238  | S O       | -2.703958 | 0.841374  | -0.419373 |
| C O                                                                                  | -2.680610 | -1.752776 | 0.045150  | S O       | 0.000226  | -2.333021 | 0.816517  |
|                                                                                      | C O       | 1.337710  | -1.283643 | 0.257089  |           |           |           |

|     |           |           |           |                                         |           |           |           |
|-----|-----------|-----------|-----------|-----------------------------------------|-----------|-----------|-----------|
| C 0 | 1.191287  | 0.056302  | 0.051009  | H 0                                     | 4.962891  | -4.267860 | 0.020013  |
| N 0 | -0.000011 | 0.778559  | 0.102326  | H 0                                     | 6.463002  | -2.392446 | -0.589196 |
| C 0 | 2.680993  | -1.752337 | 0.045219  | H 0                                     | 5.569863  | -0.088037 | -0.802148 |
| C 0 | 3.555862  | -0.697683 | -0.308929 | H 0                                     | -0.000792 | 4.949038  | -1.860535 |
| S 0 | 2.703938  | 0.841889  | -0.418984 | H 0                                     | -0.001049 | 6.074617  | 0.340253  |
| C 0 | 3.205847  | -3.051252 | 0.164128  | H 0                                     | -0.000780 | 4.737354  | 2.425029  |
| C 0 | 4.558733  | -3.265590 | -0.067654 | H 0                                     | 0.000027  | 1.229549  | -2.369033 |
| C 0 | 5.410062  | -2.204743 | -0.413062 | H 0                                     | -0.880279 | 2.631637  | -2.981159 |
| C 0 | 4.914400  | -0.908952 | -0.534073 | H 0                                     | 0.880356  | 2.631784  | -2.980765 |
| C 0 | -0.000203 | 2.224083  | 0.150108  | H 0                                     | -0.000559 | 2.689200  | 3.557481  |
| C 0 | -0.000350 | 2.960705  | -1.046337 | H 0                                     | -0.879514 | 1.384306  | 2.748711  |
| C 0 | -0.000665 | 4.359507  | -0.949541 | H 0                                     | 0.879469  | 1.384897  | 2.748980  |
| C 0 | -0.000811 | 4.991137  | 0.286924  | SCF Done: E(RB3LYP) = -                 |           |           |           |
| C 0 | -0.000648 | 4.238933  | 1.461747  | 2174.46368061                           |           |           |           |
| C 0 | -0.000345 | 2.844699  | 1.416508  | Sum of electronic and zero-point        |           |           |           |
| C 0 | -0.000067 | 2.317696  | -2.412024 | Energies= -2174.125247                  |           |           |           |
| C 0 | -0.000232 | 2.032455  | 2.685938  | Sum of electronic and thermal Energies= |           |           |           |
| H 0 | -6.462550 | -2.393489 | -0.588954 | -2174.101523                            |           |           |           |
| H 0 | -4.962134 | -4.268633 | 0.020369  | Sum of electronic and thermal           |           |           |           |
| H 0 | -2.558619 | -3.880506 | 0.430938  | Enthalpies= -2174.100579                |           |           |           |
| H 0 | -5.569760 | -0.088993 | -0.802228 | Sum of electronic and thermal Free      |           |           |           |
| H 0 | 2.559345  | -3.880142 | 0.430759  | Energies= -2174.179559                  |           |           |           |

#### 6.1.18.9 Minimum geometry of radical cation of BBTT in gas phase (B3LYP/6-311++G\*\*)

|                                                   |           |           |           |           |           |           |           |
|---------------------------------------------------|-----------|-----------|-----------|-----------|-----------|-----------|-----------|
| #p opt freq=noraman ub3lyp/6-311++g(d,p) pop=full | C 0       | 1.191141  | 0.044023  | -0.000113 |           |           |           |
| 0 1                                               | N 0       | 0.000000  | 0.728911  | -0.000159 |           |           |           |
| C 0                                               | -5.480451 | -2.093707 | -0.000063 | C 0       | 2.712154  | -1.753542 | 0.000011  |
| C 0                                               | -4.628519 | -3.209253 | 0.000047  | C 0       | 3.586569  | -0.643416 | -0.000085 |
| C 0                                               | -3.252565 | -3.051505 | 0.000076  | S 0       | 2.719491  | 0.896163  | -0.000117 |
| C 0                                               | -2.712147 | -1.753549 | 0.000017  | C 0       | 3.252576  | -3.051497 | 0.000054  |
| C 0                                               | -3.586564 | -0.643425 | -0.000100 | C 0       | 4.628530  | -3.209240 | 0.000028  |
| C 0                                               | -4.968972 | -0.799974 | -0.000152 | C 0       | 5.480460  | -2.093692 | -0.000062 |
| C 0                                               | -1.337607 | -1.336581 | 0.000015  | C 0       | 4.968977  | -0.799961 | -0.000133 |
| C 0                                               | -1.191139 | 0.044020  | -0.000110 | C 0       | -0.000001 | 2.190238  | 0.000009  |
| S 0                                               | -2.719491 | 0.896156  | -0.000160 | C 0       | 0.000001  | 2.851729  | -1.239039 |
| S 0                                               | 0.000004  | -2.458456 | 0.000132  | C 0       | -0.000007 | 4.248235  | -1.208301 |
| C 0                                               | 1.337614  | -1.336578 | 0.000006  | C 0       | -0.000009 | 4.937605  | 0.000324  |
|                                                   |           |           |           | C 0       | -0.000008 | 4.247960  | 1.208787  |

|     |           |           |           |                                         |           |          |           |
|-----|-----------|-----------|-----------|-----------------------------------------|-----------|----------|-----------|
| C O | -0.000008 | 2.851445  | 1.239214  | H O                                     | 0.882536  | 1.466725 | -2.653075 |
| C O | 0.000018  | 2.104513  | -2.549598 | H O                                     | -0.882246 | 1.466349 | -2.652906 |
| C O | -0.000040 | 2.103960  | 2.549614  | H O                                     | -0.000208 | 2.804479 | -3.384875 |
| H O | -6.553806 | -2.239682 | -0.000080 | H O                                     | 0.000316  | 2.803759 | 3.385033  |
| H O | -5.053626 | -4.205283 | 0.000107  | H O                                     | -0.882636 | 1.466265 | 2.653010  |
| H O | -2.604086 | -3.920256 | 0.000123  | H O                                     | 0.882152  | 1.465669 | 2.652750  |
| H O | -5.631416 | 0.056971  | -0.000249 | SCF Done: E(UB3LYP) = -                 |           |          |           |
| H O | 2.604100  | -3.920250 | 0.000084  | 2174.21558438                           |           |          |           |
| H O | 5.053640  | -4.205270 | 0.000074  | Sum of electronic and zero-point        |           |          |           |
| H O | 6.553815  | -2.239664 | -0.000076 | Energies= -2173.876243                  |           |          |           |
| H O | 5.631419  | 0.056986  | -0.000212 | Sum of electronic and thermal Energies= |           |          |           |
| H O | -0.000012 | 4.795647  | -2.143671 | -2173.852528                            |           |          |           |
| H O | -0.000012 | 6.021368  | 0.000443  | Sum of electronic and thermal           |           |          |           |
| H O | -0.000004 | 4.795155  | 2.144285  | Enthalpies= -2173.851583                |           |          |           |
|     |           |           |           | Sum of electronic and thermal Free      |           |          |           |
|     |           |           |           | Energies= -2173.930666                  |           |          |           |

#### 6.1.18.10 Minimum geometry of radical cation of BBTT under IEFPCM variation of PCM

(B3LYP/6-311++G\*\*, IEFPCM CH<sub>2</sub>Cl<sub>2</sub>)

```
#p ub3lyp/6-311++g(d,p) opt
freq=noraman scf=maxcycle=1000
scrf=(iefpc
m,solvent=dichloromethane) geom=check
guess=read
0 1
```

|     |           |           |           |     |           |           |           |
|-----|-----------|-----------|-----------|-----|-----------|-----------|-----------|
| C O | -5.480626 | -2.091982 | -0.000054 | S O | 2.718020  | 0.896092  | -0.000103 |
| C O | -4.628212 | -3.207649 | -0.000009 | C O | 3.251446  | -3.050206 | 0.000059  |
| C O | -3.251432 | -3.050218 | 0.000005  | C O | 4.628227  | -3.207631 | 0.000079  |
| C O | -2.711047 | -1.752420 | -0.000025 | C O | 5.480636  | -2.091961 | 0.000055  |
| C O | -3.585473 | -0.642243 | -0.000072 | C O | 4.968590  | -0.798155 | 0.000008  |
| C O | -4.968584 | -0.798173 | -0.000087 | C O | -0.000003 | 2.188227  | 0.000031  |
| C O | -1.335834 | -1.336766 | -0.000009 | C O | 0.000094  | 2.849785  | -1.238724 |
| C O | -1.190371 | 0.043033  | -0.000034 | C O | 0.000086  | 4.246620  | -1.208735 |
| S O | -2.718021 | 0.896082  | -0.000135 | C O | -0.000018 | 4.936342  | 0.000113  |
| S O | 0.000006  | -2.458482 | 0.000058  | C O | -0.000113 | 4.246545  | 1.208917  |
| C O | 1.335842  | -1.336761 | 0.000004  | C O | -0.000106 | 2.849706  | 1.238830  |
| C O | 1.190374  | 0.043038  | -0.000019 | C O | 0.000233  | 2.102731  | -2.548282 |
| N O | -0.000000 | 0.727646  | -0.000027 | C O | -0.000247 | 2.102592  | 2.548352  |
| C O | 2.711056  | -1.752410 | 0.000017  | H O | -6.554082 | -2.237371 | -0.000069 |
| C O | 3.585478  | -0.642230 | -0.000011 | H O | -5.052792 | -4.203961 | 0.000014  |
|     |           |           |           | H O | -2.602819 | -3.918375 | 0.000034  |
|     |           |           |           | H O | -5.630010 | 0.059204  | -0.000136 |
|     |           |           |           | H O | 2.602836  | -3.918366 | 0.000074  |
|     |           |           |           | H O | 5.052811  | -4.203942 | 0.000114  |
|     |           |           |           | H O | 6.554093  | -2.237346 | 0.000066  |



H O 5.630013 0.059226 -0.000028  
H O 0.000161 4.792927 -2.144658  
H O -0.000023 6.020182 0.000145  
H O -0.000192 4.792793 2.144874  
H O 0.881973 1.464108 -2.649325  
H O -0.881240 1.463745 -2.649325  
H O 0.000091 2.804144 -3.382584  
H O 0.000016 2.803969 3.382684  
H O -0.882053 1.464063 2.649421

H O 0.881161 1.463505 2.649326

SCF Done: E(UB3LYP) = -  
2174.26511508

Sum of electronic and zero-point  
Energies= -2173.926087

Sum of electronic and thermal Energies=  
-2173.902264

Sum of electronic and thermal  
Enthalpies= -2173.901320

Sum of electronic and thermal Free  
Energies= -2173.980917

### 6.1.18.11 Minimum geometry of radical cation of BBTT under SMD variation of PCM

(B3LYP/6-311++G\*\*, SMD CH<sub>2</sub>Cl<sub>2</sub>)

#p opt freq=norman ub3lyp/6-  
311++g(d,p) pop=full  
scrf=(SMD,solvent=di  
chloromethane)

0 1

C O 5.476923 -2.101999 -0.000330  
C O 4.621028 -3.214911 -0.000005  
C O 3.244612 -3.053404 0.000183  
C O 2.710044 -1.753139 0.000027  
C O 3.587825 -0.646033 -0.000310  
C O 4.970382 -0.805657 -0.000487  
C O 1.336447 -1.332956 0.000195  
C O 1.190186 0.046404 -0.000036  
S O 2.722662 0.894943 -0.000335  
S O 0.000047 -2.454189 0.000619  
C O -1.336387 -1.332998 0.000196  
C O -1.190169 0.046365 -0.000022  
N O -0.000002 0.731554 -0.000029  
C O -2.709972 -1.753222 0.000016  
C O -3.587785 -0.646142 -0.000307  
S O -2.722668 0.894860 -0.000292  
C O -3.244501 -3.053504 0.000138  
C O -4.620911 -3.215052 -0.000075  
C O -5.476839 -2.102165 -0.000389  
C O -4.970338 -0.805808 -0.000508  
C O -0.000041 2.192642 0.000102

C O -0.000081 2.854006 1.240268  
C O -0.000129 4.251311 1.209471  
C O -0.000145 4.940900 0.000402  
C O -0.000114 4.251607 -1.208799  
C O -0.000057 2.854279 -1.239897  
C O -0.000114 2.110178 2.551716  
C O 0.000055 2.110777 -2.551538  
H O 6.550118 -2.251555 -0.000452  
H O 5.042508 -4.212898 0.000106  
H O 2.593661 -3.920559 0.000435  
H O 5.636336 0.049039 -0.000686  
H O -2.593522 -3.920638 0.000377  
H O -5.042362 -4.213052 0.000006  
H O -6.550030 -2.251753 -0.000533  
H O -5.636319 0.048867 -0.000699  
H O -0.000161 4.795665 2.147048  
H O -0.000191 6.025324 0.000550  
H O -0.000134 4.796142 -2.146270  
H O -0.881114 1.470421 2.656638  
H O 0.880635 1.470058 2.656508  
H O 0.000088 2.816394 3.382326  
H O -0.000579 2.817217 -3.381956  
H O 0.881328 1.471448 -2.656767  
H O -0.880420 1.470294 -2.656365

SCF Done: E(UB3LYP) = -  
2174.29315793

Sum of electronic and zero-point  
Energies= -2173.954038

Sum of electronic and thermal  
Enthalpies= -2173.929323

Sum of electronic and thermal Energies=  
-2173.930267

Sum of electronic and thermal Free  
Energies= -2174.009286

6.1.18.12 Transition state of native BBTT under IEFPCM variation of PCM

(B3LYP/6-311++G\*\*, IEFPCM CH<sub>2</sub>Cl<sub>2</sub>) + energies of ringinversion relaxed geometry PES

scan

#p opt=(ts,noeigen,calcfc) freq=noraman  
B3LYP/6-311++g(d,p) pop=full s

crf=(iefpcm,solvent=dichloromethane)  
geom=check guess=read

0 1

C 0 5.501229 -2.102511 -0.000013  
C 0 4.638761 -3.208983 0.000011  
C 0 3.259664 -3.041111 0.000017  
C 0 2.720601 -1.742443 -0.000002  
C 0 3.607957 -0.640230 -0.000027  
C 0 4.990530 -0.806436 -0.000032  
C 0 1.344950 -1.326764 0.000006  
C 0 1.193733 0.028179 -0.000016  
S 0 2.734263 0.889609 -0.000045  
S 0 0.000003 -2.508812 0.000064  
C 0 -1.344945 -1.326767 0.000005  
C 0 -1.193731 0.028176 -0.000018  
N 0 0.000000 0.747498 -0.000020  
C 0 -2.720596 -1.742449 -0.000008  
C 0 -3.607955 -0.640238 -0.000040  
S 0 -2.734263 0.889603 -0.000060  
C 0 -3.259656 -3.041118 0.000012  
C 0 -4.638752 -3.208993 0.000000  
C 0 -5.501223 -2.102523 -0.000030  
C 0 -4.990527 -0.806447 -0.000051  
C 0 -0.000002 2.191964 0.000012  
C 0 -0.000022 2.868739 1.232548  
C 0 -0.000027 4.266420 1.207948  
C 0 -0.000011 4.958463 0.000078  
C 0 0.000009 4.266477 -1.207824  
C 0 0.000014 2.868797 -1.232492

C 0 -0.000047 2.119213 2.541331  
C 0 0.000043 2.119337 -2.541315  
H 0 6.574236 -2.253724 -0.000017  
H 0 5.054409 -4.210087 0.000026  
H 0 2.604527 -3.905066 0.000037  
H 0 5.654900 0.049748 -0.000050  
H 0 -2.604517 -3.905071 0.000036  
H 0 -5.054398 -4.210098 0.000016  
H 0 -6.574229 -2.253739 -0.000038  
H 0 -5.654900 0.049735 -0.000074  
H 0 -0.000042 4.812278 2.144862  
H 0 -0.000015 6.042796 0.000103  
H 0 0.000021 4.812379 -2.144713  
H 0 0.879628 1.476574 2.634385  
H 0 0.000044 2.816196 3.380218  
H 0 -0.879842 1.476743 2.634441  
H 0 -0.000025 2.816365 -3.380164  
H 0 0.879827 1.476857 -2.634447  
H 0 -0.879643 1.476720 -2.634414

SCF Done: E(RB3LYP) = -  
2174.43927996

Sum of electronic and zero-point  
Energies= -2174.101140

Sum of electronic and thermal Energies=  
-2174.078039

Sum of electronic and thermal  
Enthalpies= -2174.077095

Sum of electronic and thermal Free  
Energies= -2174.154025

Relaxed PES scan via:

#p b3lyp/6-311G\*\* opt=ModRedundant  
nosymm  
scrf=(iefpcm,solvent=dichloromethane)  
With D 7 8 13 21 S 60 1.0

HF=-2174.4247453,-2174.4247788,-  
2174.4247869,-2174.4247926,-

2174.4247961,-2174.4247974,-  
2174.4247965,-2174.4247934,-  
2174.4247882,-

2174.4247809,-2174.4247717,-  
2174.4247608,-2174.4247486,-  
2174.4247358,-

2174.4247228,-2174.4247089,-  
2174.4246934,-2174.424672,-  
2174.4246566,-2

174.4246352,-2174.4246118,-  
2174.4245862,-2174.4245582,-  
2174.4245275,-2

174.4244939,-2174.4244572,-  
2174.4244175,-2174.4243747,-  
2174.4243287,-2

174.4242794,-2174.4242264,-  
2174.4241695,-2174.4241088,-  
2174.4240441,-2

174.4239758,-2174.4239043,-  
2174.4238299,-2174.4238914,-  
2174.4238079,-2

174.4237192,-2174.4236249,-  
2174.4235245,-2174.4234176,-  
2174.4233036,-2

174.4231822,-2174.4230529,-  
2174.4229155,-2174.4227697,-  
2174.4226153,-2

174.4224655,-2174.4222993,-  
2174.4221241,-2174.4219416,-  
2174.4217498,-2

174.421548,-2174.4213361,-  
2174.4211136,-2174.4208805,-  
2174.4206364,-21

74.4203813,-2174.4201204

Relaxed PES scan via:

#p b3lyp/6-311G\*\* opt=ModRedundant  
nosymm  
scrf=(iefpcm,solvent=dichloromethane)

With D 7 8 13 21 S 60 -1.0

HF=-2174.4247453,-2174.4247779,-  
2174.4247861,-2174.4247921,-2174.

4247958,-2174.4247972,-2174.4247966,-  
2174.4247937,-2174.4247887,-2174.

4247816,-2174.4247725,-2174.4247617,-  
2174.4247496,-2174.4247369,-2174.

424724,-2174.4247102,-2174.4246948,-  
2174.4246776,-2174.4246584,-2174.4

246372,-2174.424614,-2174.4245886,-  
2174.4245608,-2174.4245302,-2174.42

44968,-2174.4244604,-2174.4244209,-  
2174.4243784,-2174.4243326,-2174.42

42836,-2174.4242309,-2174.4241744,-  
2174.424114,-2174.4240498,-2174.424

1213,-2174.424051,-2174.4239766,-  
2174.423898,-2174.4238148,-2174.42372

66,-2174.4236328,-2174.423533,-  
2174.4234266,-2174.4233132,-  
2174.423192

4,-2174.4230637,-2174.4229271,-  
2174.422782,-2174.4226283,-  
2174.4224787

, -2174.4223133,-2174.4221389,-  
2174.4219568,-2174.4217659,-  
2174.421565,

-2174.4213539,-2174.4211324,-  
2174.4209001,-2174.420657,-  
2174.4204029,-

2174.4201426

## 6.1.19 *anti-anti-N-ortho,ortho'*-methylmethoxyphenyl-BBTT 3t

### 6.1.19.1 Minimum geometry of native BBTT in gas phase (B3LYP/6-311++G\*\*)

|                                          |           |           |           |           |
|------------------------------------------|-----------|-----------|-----------|-----------|
| Conformer I:                             | C 0       | -4.607222 | -3.293897 | 0.132738  |
| #p opt freq=noraman rb3lyp/6-311++g(d,p) | C 0       | -3.241228 | -3.084737 | 0.265735  |
| pop=full                                 | C 0       | -2.708286 | -1.809499 | 0.015053  |
| 0 1                                      | C 0       | -3.587564 | -0.770820 | -0.370560 |
| C 0                                      | -5.463748 | -2.249210 | -0.243391 |           |

C O -4.958766 -0.977193 -0.497030  
 C O -1.348294 -1.353516 0.114236  
 C O -1.198062 -0.038202 -0.203207  
 S O -2.722568 0.737930 -0.645051  
 S O -0.014407 -2.401195 0.675941  
 C O 1.327474 -1.367171 0.108745  
 C O 1.188603 -0.050327 -0.207276  
 N O -0.001284 0.676432 -0.284050  
 C O 2.681319 -1.837854 -0.003814  
 C O 3.567596 -0.808862 -0.399573  
 S O 2.716549 0.708686 -0.668170  
 C O 3.202837 -3.118812 0.241824  
 C O 4.564900 -3.342952 0.094436  
 C O 5.428799 -2.307723 -0.291187  
 C O 4.935175 -1.030428 -0.540173  
 C O 0.009098 2.109125 -0.176513  
 C O -0.010511 2.915798 -1.320079  
 C O 0.007613 4.307917 -1.149953  
 C O 0.040794 4.867612 0.118741  
 C O 0.059869 4.065976 1.260328  
 C O 0.045105 2.679320 1.116656  
 O O 0.062165 1.796768 2.144086  
 C O 0.100114 2.293172 3.478293  
 C O -0.069412 2.329605 -2.709515  
 H O -6.527624 -2.431432 -0.340722  
 H O -5.018001 -4.278911 0.322897  
 H O -2.586198 -3.898912 0.554410  
 H O -5.618505 -0.168603 -0.790238  
 H O 2.541928 -3.925651 0.537685  
 H O 4.966920 -4.332328 0.280638  
 H O 6.489497 -2.501678 -0.399803  
 H O 5.600500 -0.229335 -0.841095  
 H O -0.002092 4.948077 -2.024846  
 H O 0.055415 5.946062 0.231383  
 H O 0.087257 4.522660 2.240021  
 H O 0.107465 1.412619 4.117550  
 H O 1.005988 2.881351 3.656440

H O -0.784456 2.898510 3.700769  
 H O 0.280855 1.298659 -2.735556  
 H O -1.097028 2.338949 -3.086846  
 H O 0.539348 2.920126 -3.397645

SCF Done: E(RB3LYP) = -2249.65972404

Sum of electronic and zero-point Energies= -2249.316191

Sum of electronic and thermal Energies= -2249.291350

Sum of electronic and thermal Enthalpies= -2249.290406

Sum of electronic and thermal Free Energies= -2249.373190

Conformer II:

#p opt freq=noraman rb3lyp/6-311++g(d,p)  
pop=full

0 1

C O -5.413121 -2.248199 0.436610  
 C O -4.558017 -3.342503 0.240683  
 C O -3.203969 -3.156702 -0.002452  
 C O -2.680971 -1.853702 -0.047645  
 C O -3.558504 -0.763261 0.158298  
 C O -4.918035 -0.948049 0.395873  
 C O -1.334964 -1.417256 -0.299108  
 C O -1.192441 -0.063053 -0.258113  
 S O -2.706693 0.776075 0.082469  
 S O 0.000146 -2.527994 -0.720774  
 C O 1.334870 -1.417264 -0.298628  
 C O 1.192448 -0.063054 -0.257972  
 N O 0.000008 0.648348 -0.422298  
 C O 2.680876 -1.853700 -0.047073  
 C O 3.558440 -0.763285 0.158820  
 S O 2.706632 0.776137 0.082676  
 C O 3.203811 -3.156700 -0.001799  
 C O 4.557859 -3.342558 0.241230  
 C O 5.413029 -2.248278 0.437011  
 C O 4.918027 -0.948103 0.396235  
 C O -0.000031 2.083828 -0.430272

|     |           |           |           |                                         |           |          |           |
|-----|-----------|-----------|-----------|-----------------------------------------|-----------|----------|-----------|
| C O | 0.000299  | 2.788009  | -1.639808 | H O                                     | -0.000067 | 5.943228 | -0.361439 |
| C O | 0.000231  | 4.189220  | -1.593665 | H O                                     | -0.000508 | 4.702579 | 1.764529  |
| C O | -0.000007 | 4.858955  | -0.379087 | H O                                     | -0.000939 | 1.776744 | 3.913621  |
| C O | -0.000296 | 4.161168  | 0.828615  | H O                                     | 0.894784  | 3.208018 | 3.343340  |
| C O | -0.000341 | 2.766830  | 0.809300  | H O                                     | -0.896354 | 3.208091 | 3.343075  |
| O O | -0.000618 | 1.981206  | 1.913031  | H O                                     | -0.009179 | 0.999413 | -2.864590 |
| C O | -0.000788 | 2.595756  | 3.197194  | H O                                     | -0.873298 | 2.376016 | -3.560053 |
| C O | 0.001578  | 2.082353  | -2.972848 | H O                                     | 0.889255  | 2.358932 | -3.549226 |
| H O | -6.467859 | -2.413345 | 0.623003  | SCF Done: E(RB3LYP) = -                 |           |          |           |
| H O | -4.960896 | -4.348209 | 0.278725  | 2249.65966831                           |           |          |           |
| H O | -2.549160 | -4.008092 | -0.149524 | Sum of electronic and zero-point        |           |          |           |
| H O | -5.576236 | -0.100629 | 0.549892  | Energies= -2249.316146                  |           |          |           |
| H O | 2.548917  | -4.008042 | -0.148711 | Sum of electronic and thermal Energies= |           |          |           |
| H O | 4.960695  | -4.348264 | 0.279354  | -2249.292189                            |           |          |           |
| H O | 6.467870  | -2.413497 | 0.623327  | Sum of electronic and thermal           |           |          |           |
| H O | 5.576282  | -0.100732 | 0.550198  | Enthalpies= -2249.291245                |           |          |           |
| H O | 0.000339  | 4.749501  | -2.521994 | Sum of electronic and thermal Free      |           |          |           |
|     |           |           |           | Energies= -2249.370978                  |           |          |           |

### 6.1.19.2 Minimum geometry of native BBT under IEFPCM variation of PCM

(B3LYP/6-311++G\*\*, IEFPCM CH<sub>2</sub>Cl<sub>2</sub>)

|                                         |           |           |           |           |           |           |           |
|-----------------------------------------|-----------|-----------|-----------|-----------|-----------|-----------|-----------|
| Conformer I:                            | N O       | -0.000000 | 0.665907  | -0.241803 |           |           |           |
| #p opt=verytight freq=noraman rb3lyp/6- | C O       | 2.698698  | -1.833068 | 0.013236  |           |           |           |
| 311++g(d,p) pop=full Int=UltraF         | C O       | 3.580349  | -0.789299 | -0.355879 |           |           |           |
| ine                                     | S O       | 2.718029  | 0.726963  | -0.605091 |           |           |           |
| SCRF=(IEFPCM,Solvent=Dichloromethan     | C O       | 3.229023  | -3.114265 | 0.243249  |           |           |           |
| e) geom=check                           | C O       | 4.595225  | -3.323997 | 0.104154  |           |           |           |
| 0 1                                     | C O       | 5.453612  | -2.274564 | -0.257265 |           |           |           |
| C O                                     | -5.453615 | -2.274559 | -0.257261 | C O       | 4.951446  | -0.996277 | -0.488979 |
| C O                                     | -4.595228 | -3.323993 | 0.104157  | C O       | 0.000001  | 2.102639  | -0.186907 |
| C O                                     | -3.229026 | -3.114262 | 0.243251  | C O       | -0.000000 | 2.867222  | -1.359766 |
| C O                                     | -2.698700 | -1.833065 | 0.013237  | C O       | 0.000001  | 4.265167  | -1.238151 |
| C O                                     | -3.580351 | -0.789296 | -0.355878 | C O       | 0.000003  | 4.868494  | 0.011188  |
| C O                                     | -4.951447 | -0.996272 | -0.488976 | C O       | 0.000004  | 4.107894  | 1.181812  |
| C O                                     | -1.339833 | -1.375073 | 0.118723  | C O       | 0.000003  | 2.716969  | 1.087912  |
| C O                                     | -1.192506 | -0.052974 | -0.175840 | O O       | 0.000004  | 1.873030  | 2.148137  |
| S O                                     | -2.718029 | 0.726966  | -0.605090 | C O       | 0.000007  | 2.426623  | 3.467647  |
| S O                                     | -0.000001 | -2.431974 | 0.655260  | C O       | -0.000004 | 2.239072  | -2.732119 |
| C O                                     | 1.339831  | -1.375075 | 0.118722  | H O       | -6.516844 | -2.457273 | -0.359578 |
| C O                                     | 1.192505  | -0.052975 | -0.175841 |           |           |           |           |

|                                         |           |           |           |     |           |           |           |
|-----------------------------------------|-----------|-----------|-----------|-----|-----------|-----------|-----------|
| H O                                     | -5.004326 | -4.312511 | 0.278780  | C O | -1.191364 | -0.068278 | -0.246838 |
| H O                                     | -2.574872 | -3.932438 | 0.522841  | S O | -2.708339 | 0.778359  | 0.061754  |
| H O                                     | -5.612740 | -0.184915 | -0.769863 | S O | 0.000001  | -2.549416 | -0.652281 |
| H O                                     | 2.574868  | -3.932440 | 0.522840  | C O | 1.337114  | -1.423479 | -0.271424 |
| H O                                     | 5.004322  | -4.312515 | 0.278777  | C O | 1.191364  | -0.068278 | -0.246838 |
| H O                                     | 6.516841  | -2.457279 | -0.359582 | N O | -0.000000 | 0.642795  | -0.400558 |
| H O                                     | 5.612739  | -0.184920 | -0.769867 | C O | 2.688327  | -1.854033 | -0.035983 |
| H O                                     | 0.000000  | 4.874109  | -2.135113 | C O | 3.566058  | -0.758512 | 0.145069  |
| H O                                     | 0.000004  | 5.950147  | 0.086810  | S O | 2.708339  | 0.778360  | 0.061754  |
| H O                                     | 0.000006  | 4.599976  | 2.144393  | C O | 3.216355  | -3.155785 | 0.014912  |
| H O                                     | 0.000008  | 1.573318  | 4.142178  | C O | 4.575231  | -3.334400 | 0.241524  |
| H O                                     | 0.895236  | 3.030245  | 3.639765  | C O | 5.429412  | -2.234676 | 0.415166  |
| H O                                     | -0.895219 | 3.030246  | 3.639769  | C O | 4.929771  | -0.935525 | 0.367065  |
| H O                                     | 0.000010  | 1.151181  | -2.690285 | C O | -0.000000 | 2.080230  | -0.420533 |
| H O                                     | -0.880578 | 2.558878  | -3.296073 | C O | -0.000000 | 2.757281  | -1.647696 |
| H O                                     | 0.880551  | 2.558900  | -3.296088 | C O | -0.000001 | 4.156176  | -1.632984 |
| SCF Done: E(RB3LYP) = -                 |           |           |           | C O | -0.000001 | 4.850887  | -0.427503 |
| 2249.66884333                           |           |           |           | C O | -0.000001 | 4.179783  | 0.793085  |
| Sum of electronic and zero-point        |           |           |           | C O | -0.000001 | 2.782071  | 0.804673  |
| Energies= -2249.325447                  |           |           |           | O O | -0.000001 | 2.022182  | 1.926285  |
| Sum of electronic and thermal Energies= |           |           |           | C O | -0.000002 | 2.672685  | 3.200753  |
| -2249.300581                            |           |           |           | C O | 0.000000  | 1.994285  | -2.947983 |
| Sum of electronic and thermal           |           |           |           | H O | -6.486976 | -2.394306 | 0.589496  |
| Enthalpies= -2249.299637                |           |           |           | H O | -4.982007 | -4.338311 | 0.283807  |
| Sum of electronic and thermal Free      |           |           |           | H O | -2.565176 | -4.012566 | -0.116891 |
| Energies= -2249.382814                  |           |           |           | H O | -5.586828 | -0.084505 | 0.503400  |
| Conformer II:                           |           |           |           | H O | 2.565177  | -4.012565 | -0.116890 |
| #p opt=verytight freq=norman rb3lyp/6-  |           |           |           | H O | 4.982009  | -4.338310 | 0.283808  |
| 311++g(d,p) pop=full Guess=Read         |           |           |           | H O | 6.486977  | -2.394304 | 0.589496  |
| geom=check                              |           |           |           | H O | 5.586828  | -0.084503 | 0.503400  |
| SCRF=(IEFPCM,Solvent=Dichloromethan     |           |           |           | H O | -0.000001 | 4.698219  | -2.571401 |
| e)                                      |           |           |           | H O | -0.000001 | 5.935134  | -0.431816 |
| 0 1                                     |           |           |           | H O | -0.000001 | 4.741025  | 1.717066  |
| C O                                     | -5.429411 | -2.234677 | 0.415166  | H O | -0.000002 | 1.872047  | 3.936987  |
| C O                                     | -4.575230 | -3.334402 | 0.241524  | H O | 0.895258  | 3.287199  | 3.327865  |
| C O                                     | -3.216354 | -3.155786 | 0.014912  | H O | -0.895262 | 3.287199  | 3.327864  |
| C O                                     | -2.688327 | -1.854034 | -0.035983 | H O | -0.879080 | 1.349390  | -3.031200 |
| C O                                     | -3.566057 | -0.758513 | 0.145069  |     |           |           |           |
| C O                                     | -4.929771 | -0.935526 | 0.367065  |     |           |           |           |
| C O                                     | -1.337113 | -1.423480 | -0.271424 |     |           |           |           |

H O -0.000000 2.681797 -3.794565  
H O 0.879081 1.349391 -3.031200  
SCF Done: E(RB3LYP) = -  
2249.66960096  
Sum of electronic and zero-point  
Energies= -2249.326122

Sum of electronic and thermal Energies=  
-2249.301356  
Sum of electronic and thermal  
Enthalpies= -2249.300412  
Sum of electronic and thermal Free  
Energies= -2249.381966

### 6.1.19.3 Minimum geometry of native BBTT under SMD variation of PCM (B3LYP/6-311++G\*\*,

#### SMD CH<sub>2</sub>Cl<sub>2</sub>)

Conformer I:  
#p opt=verytight int=ultrafine  
freq=noraman rb3lyp/6-311++g(d,p) scrf=  
(smd,solvent=dichloromethane) pop=full  
geom=checkpoint guess=read

0 1  
C O -5.455228 -2.269845 -0.271118  
C O -4.599441 -3.311671 0.117759  
C O -3.234253 -3.099179 0.263985  
C O -2.702375 -1.822102 0.013928  
C O -3.581903 -0.786618 -0.382213  
C O -4.952133 -0.995739 -0.522733  
C O -1.344534 -1.359542 0.122325  
C O -1.193907 -0.043032 -0.194631  
S O -2.718238 0.725920 -0.652993  
S O -0.006084 -2.403780 0.687200  
C O 1.335353 -1.365189 0.119101  
C O 1.189466 -0.048172 -0.197862  
N O -0.000765 0.674574 -0.266326  
C O 2.690945 -1.833486 0.007500  
C O 3.573823 -0.801984 -0.391553  
S O 2.715777 0.714014 -0.661109  
C O 3.218019 -3.112575 0.257338  
C O 4.581969 -3.330893 0.108221  
C O 5.441191 -2.292962 -0.283486  
C O 4.942843 -1.016964 -0.535024  
C O 0.002711 2.111368 -0.175427  
C O -0.000645 2.906725 -1.328060  
C O 0.003647 4.301344 -1.167548  
C O 0.011484 4.870234 0.098169

C O 0.015569 4.078690 1.248459  
C O 0.011021 2.690535 1.116435  
O O 0.014413 1.817069 2.150651  
C O 0.042611 2.329383 3.488167  
C O -0.007815 2.317143 -2.716726  
H O -6.517768 -2.455376 -0.378730  
H O -5.009670 -4.297158 0.307909  
H O -2.584257 -3.913580 0.564538  
H O -5.612180 -0.190396 -0.824673  
H O 2.565254 -3.923914 0.560176  
H O 4.988491 -4.317925 0.298345  
H O 6.502715 -2.482995 -0.393276  
H O 5.605589 -0.214633 -0.839063  
H O 0.001103 4.934449 -2.047963  
H O 0.014764 5.949798 0.202978  
H O 0.021837 4.544071 2.224654  
H O 0.050048 1.453851 4.135295  
H O 0.945607 2.920624 3.663916  
H O -0.846268 2.930613 3.698818  
H O -0.006809 1.227837 -2.708130  
H O -0.891762 2.651668 -3.267922  
H O 0.869568 2.653201 -3.277397

SCF Done: E(RB3LYP) = -  
2249.69265995  
Sum of electronic and zero-point  
Energies= -2249.349367  
Sum of electronic and thermal Energies=  
-2249.324643  
Sum of electronic and thermal  
Enthalpies= -2249.323699

Sum of electronic and thermal Free  
Energies= -2249.405477  
Conformer II:  
#p opt freq=noraman rb3lyp/6-311++g(d,p)  
scrf=(smd,solvent=dichloromet  
hane) pop=full geom=checkpoint  
guess=read

0 1  
C 0 -5.416757 -2.254979 0.451575  
C 0 -4.564791 -3.349047 0.235489  
C 0 -3.209766 -3.164224 -0.009196  
C 0 -2.682601 -1.860976 -0.034728  
C 0 -3.558732 -0.771832 0.188709  
C 0 -4.918767 -0.954487 0.428611  
C 0 -1.336933 -1.420195 -0.285785  
C 0 -1.190806 -0.065649 -0.230418  
S 0 -2.704187 0.768758 0.132335  
S 0 0.000059 -2.524696 -0.727196  
C 0 1.337003 -1.420152 -0.285744  
C 0 1.190830 -0.065610 -0.230375  
N 0 0.000003 0.645750 -0.383221  
C 0 2.682681 -1.860889 -0.034664  
C 0 3.558773 -0.771716 0.188786  
S 0 2.704177 0.768845 0.132410  
C 0 3.209890 -3.164119 -0.009130  
C 0 4.564918 -3.348898 0.235569  
C 0 5.416845 -2.254802 0.451666  
C 0 4.918812 -0.954326 0.428702  
C 0 -0.000022 2.083473 -0.439188  
C 0 0.000038 2.731900 -1.682748  
C 0 0.000012 4.131192 -1.699482  
C 0 -0.000076 4.853650 -0.510041

C 0 -0.000140 4.211242 0.725747  
C 0 -0.000113 2.813665 0.770125  
O 0 -0.000182 2.081789 1.908753  
C 0 -0.000285 2.761647 3.169773  
C 0 0.000140 1.944105 -2.967403  
H 0 -6.471364 -2.420089 0.639945  
H 0 -4.970354 -4.354359 0.258415  
H 0 -2.563239 -4.019038 -0.174783  
H 0 -5.573960 -0.107503 0.598231  
H 0 2.563394 -4.018954 -0.174730  
H 0 4.970515 -4.354196 0.258495  
H 0 6.471456 -2.419877 0.640047  
H 0 5.573975 -0.107321 0.598330  
H 0 0.000061 4.650433 -2.651034  
H 0 -0.000097 5.938017 -0.539365  
H 0 -0.000212 4.792766 1.637459  
H 0 -0.000332 1.976323 3.923961  
H 0 0.895807 3.377776 3.285304  
H 0 -0.896408 3.377755 3.285169  
H 0 -0.879338 1.297710 -3.041655  
H 0 0.000182 2.617896 -3.825613  
H 0 0.879657 1.297749 -3.041536

SCF Done: E(RB3LYP) = -  
2249.69336649

Sum of electronic and zero-point  
Energies= -2249.350011

Sum of electronic and thermal Energies=  
-2249.325295

Sum of electronic and thermal  
Enthalpies= -2249.324351

Sum of electronic and thermal Free  
Energies= -2249.405527

#### 6.1.19.4 Minimum geometry of radical cation of BBTT in gas phase (B3LYP/6-311++G\*\*)

#p opt freq=noraman ub3lyp/6-  
311++g(d,p) pop=full  
0 1  
C 0 -5.480855 -2.187722 0.053486  
C 0 -4.629712 -3.300426 0.139604

C 0 -3.253601 -3.144971 0.113538  
C 0 -2.712372 -1.852637 -0.000846  
C 0 -3.585824 -0.745092 -0.086026  
C 0 -4.968290 -0.899438 -0.060231  
C 0 -1.337393 -1.438709 -0.046399



|     |           |           |           |                                         |           |           |           |
|-----|-----------|-----------|-----------|-----------------------------------------|-----------|-----------|-----------|
| C 0 | -1.190819 | -0.063544 | -0.162297 | H 0                                     | -2.605512 | -4.011388 | 0.181022  |
| S 0 | -2.717069 | 0.787619  | -0.218660 | H 0                                     | -5.630124 | -0.044547 | -0.126250 |
| S 0 | -0.000071 | -2.556782 | 0.037448  | H 0                                     | 2.605296  | -4.011484 | 0.181090  |
| C 0 | 1.337296  | -1.438755 | -0.046361 | H 0                                     | 5.055149  | -4.292563 | 0.227695  |
| C 0 | 1.190779  | -0.063589 | -0.162288 | H 0                                     | 6.554146  | -2.331917 | 0.075515  |
| N 0 | -0.000008 | 0.616867  | -0.236835 | H 0                                     | 5.630092  | -0.044769 | -0.125976 |
| C 0 | 2.712258  | -1.852739 | -0.000781 | H 0                                     | 0.000352  | 4.644566  | -2.483017 |
| C 0 | 3.585759  | -0.745233 | -0.085921 | H 0                                     | 0.000105  | 5.900669  | -0.360252 |
| S 0 | 2.717068  | 0.787515  | -0.218562 | H 0                                     | -0.000254 | 4.736303  | 1.805086  |
| C 0 | 3.253427  | -3.145098 | 0.113618  | H 0                                     | 0.000295  | 1.850801  | 4.047862  |
| C 0 | 4.629529  | -3.300614 | 0.139720  | H 0                                     | 0.896430  | 3.267036  | 3.442055  |
| C 0 | 5.480724  | -2.187945 | 0.053659  | H 0                                     | -0.896435 | 3.266861  | 3.442500  |
| C 0 | 4.968218  | -0.899636 | -0.060049 | H 0                                     | -0.881124 | 1.297595  | -2.927868 |
| C 0 | 0.000015  | 2.067249  | -0.304117 | H 0                                     | 0.000118  | 2.620543  | -3.691170 |
| C 0 | 0.000194  | 2.713362  | -1.547236 | H 0                                     | 0.883394  | 1.298946  | -2.927937 |
| C 0 | 0.000237  | 4.110828  | -1.540523 | SCF Done: E(UB3LYP) = -                 |           |           |           |
| C 0 | 0.000116  | 4.817038  | -0.341600 | 2249.44738377                           |           |           |           |
| C 0 | -0.000077 | 4.163761  | 0.888149  | Sum of electronic and zero-point        |           |           |           |
| C 0 | -0.000106 | 2.768214  | 0.918874  | Energies= -2249.102905                  |           |           |           |
| O 0 | -0.000254 | 2.007329  | 2.035935  | Sum of electronic and thermal Energies= |           |           |           |
| C 0 | 0.000026  | 2.654706  | 3.315685  | -2249.078295                            |           |           |           |
| C 0 | 0.000630  | 1.938827  | -2.841070 | Sum of electronic and thermal           |           |           |           |
| H 0 | -6.554284 | -2.331648 | 0.075279  | Enthalpies= -2249.077350                |           |           |           |
| H 0 | -5.055378 | -4.292354 | 0.227587  | Sum of electronic and thermal Free      |           |           |           |
|     |           |           |           | Energies= -2249.158527                  |           |           |           |

#### 6.1.19.5 Minimum geometry of radical cation of BBTT under SMD variation of PCM

(B3LYP/6-311++G\*\*, SMD CH<sub>2</sub>Cl<sub>2</sub>)

|                                    |           |           |           |           |          |           |           |
|------------------------------------|-----------|-----------|-----------|-----------|----------|-----------|-----------|
| #p opt freq=noraman ub3lyp/6-      | C 0       | -1.185673 | -0.070391 | -0.167892 |          |           |           |
| 311++g(d,p) pop=full               | S 0       | -2.718111 | 0.773000  | -0.225140 |          |           |           |
| scrf=(SMD,solvent=dichloromethane) | S 0       | 0.015390  | -2.558489 | 0.017294  |          |           |           |
| 0 1                                | C 0       | 1.346933  | -1.433058 | -0.049851 |          |           |           |
| C 0                                | -5.465202 | -2.219626 | 0.042758  | C 0       | 1.193199 | -0.058995 | -0.157594 |
| C 0                                | -4.606707 | -3.327812 | 0.119597  | N 0       | 0.001072 | 0.615982  | -0.232553 |
| C 0                                | -3.230778 | -3.164626 | 0.091096  | C 0       | 2.723703 | -1.840697 | 0.005474  |
| C 0                                | -2.698880 | -1.867671 | -0.016473 | C 0       | 3.593072 | -0.728684 | -0.060535 |
| C 0                                | -3.579328 | -0.765269 | -0.095119 | S 0       | 2.716974 | 0.800665  | -0.194324 |
| C 0                                | -4.961361 | -0.926835 | -0.065691 | C 0       | 3.268938 | -3.132039 | 0.114257  |
| C 0                                | -1.326151 | -1.445702 | -0.059064 | C 0       | 4.646265 | -3.280104 | 0.156312  |

|     |           |           |           |                                         |           |           |           |
|-----|-----------|-----------|-----------|-----------------------------------------|-----------|-----------|-----------|
| C 0 | 5.493383  | -2.162421 | 0.091995  | H 0                                     | 5.635115  | -0.016056 | -0.066221 |
| C 0 | 4.976381  | -0.874908 | -0.017415 | H 0                                     | 0.020799  | 4.645681  | -2.483273 |
| C 0 | -0.006609 | 2.065734  | -0.307814 | H 0                                     | -0.046425 | 5.900792  | -0.358156 |
| C 0 | 0.021388  | 2.712515  | -1.548897 | H 0                                     | -0.086050 | 4.733028  | 1.807093  |
| C 0 | 0.003353  | 4.113160  | -1.539310 | H 0                                     | -0.117644 | 1.850172  | 4.047403  |
| C 0 | -0.034039 | 4.816555  | -0.341757 | H 0                                     | 0.766277  | 3.284840  | 3.466737  |
| C 0 | -0.057390 | 4.161767  | 0.889616  | H 0                                     | -1.026152 | 3.248169  | 3.415261  |
| C 0 | -0.044433 | 2.767896  | 0.918107  | H 0                                     | -0.104601 | 0.898923  | -2.754651 |
| O 0 | -0.064167 | 2.006249  | 2.033261  | H 0                                     | -0.631228 | 2.378634  | -3.564798 |
| C 0 | -0.113679 | 2.655151  | 3.314958  | H 0                                     | 1.084122  | 2.081762  | -3.303495 |
| C 0 | 0.091340  | 1.966532  | -2.856575 | SCF Done: E(UB3LYP) = -                 |           |           |           |
| H 0 | -6.538007 | -2.370090 | 0.067537  | 2249.52333632                           |           |           |           |
| H 0 | -5.025620 | -4.323478 | 0.202653  | Sum of electronic and zero-point        |           |           |           |
| H 0 | -2.578023 | -4.028235 | 0.151378  | Energies= -2249.178861                  |           |           |           |
| H 0 | -5.629279 | -0.075698 | -0.123961 | Sum of electronic and thermal Energies= |           |           |           |
| H 0 | 2.625565  | -4.003270 | 0.164444  | -2249.154436                            |           |           |           |
| H 0 | 5.075130  | -4.271459 | 0.240208  | Sum of electronic and thermal           |           |           |           |
| H 0 | 6.567457  | -2.301221 | 0.127241  | Enthalpies= -2249.153492                |           |           |           |
|     |           |           |           | Sum of electronic and thermal Free      |           |           |           |
|     |           |           |           | Energies= -2249.234029                  |           |           |           |

### 6.1.20 *anti-anti-N-ortho,ortho'*-dimethoxyphenyl-BBTT 3j

#### 6.1.20.1 Minimum geometry of native BBTT in gas phase (B3LYP/6-311++G\*\*)

```
#p opt freq=noraman rb3lyp/6-311++g(d,p)
pop=full
0 1
```

|     |           |           |           |     |           |           |           |
|-----|-----------|-----------|-----------|-----|-----------|-----------|-----------|
| C 0 | 5.425501  | -2.388192 | -0.375860 | C 0 | -3.565034 | -0.886415 | -0.282841 |
| C 0 | 4.568988  | -3.457963 | -0.077975 | S 0 | -2.709234 | 0.649309  | -0.381159 |
| C 0 | 3.211246  | -3.250993 | 0.124834  | C 0 | -3.211953 | -3.250349 | 0.125847  |
| C 0 | 2.685551  | -1.952098 | 0.024615  | C 0 | -4.569821 | -3.457024 | -0.076333 |
| C 0 | 3.564610  | -0.887168 | -0.284200 | C 0 | -5.426284 | -2.387045 | -0.373627 |
| C 0 | 4.927796  | -1.092425 | -0.480175 | C 0 | -4.928370 | -1.091375 | -0.478126 |
| C 0 | 1.336307  | -1.495612 | 0.215058  | C 0 | 0.000285  | 1.993921  | 0.125594  |
| C 0 | 1.192919  | -0.153357 | 0.033525  | C 0 | 0.001470  | 2.654561  | 1.368304  |
| S 0 | 2.709090  | 0.648760  | -0.382072 | C 0 | 0.001848  | 4.052913  | 1.414532  |
| S 0 | -0.000195 | -2.565805 | 0.727782  | C 0 | 0.000912  | 4.768573  | 0.221330  |
| C 0 | -1.336615 | -1.495343 | 0.215256  | C 0 | -0.000361 | 4.137326  | -1.018022 |
| C 0 | -1.193060 | -0.153098 | 0.033718  | C 0 | -0.000679 | 2.738337  | -1.068805 |
| N 0 | -0.000007 | 0.567841  | 0.084441  | O 0 | -0.001873 | 2.012063  | -2.210864 |
| C 0 | -2.686041 | -1.951548 | 0.025469  | C 0 | -0.002556 | 2.692688  | -3.461874 |
|     |           |           |           | O 0 | 0.002203  | 1.849792  | 2.455050  |
|     |           |           |           | C 0 | 0.003384  | 2.440201  | 3.751531  |
|     |           |           |           | H 0 | 6.483038  | -2.569079 | -0.529037 |

H O 4.973404 -4.461075 -0.003920  
H O 2.555849 -4.084136 0.352174  
H O 5.587129 -0.264097 -0.713235  
H O -2.556584 -4.083625 0.352777  
H O -4.974397 -4.460058 -0.002069  
H O -6.483972 -2.567663 -0.526086  
H O -5.587669 -0.262883 -0.710693  
H O 0.002785 4.578484 2.358769  
H O 0.001196 5.852218 0.258807  
H O -0.001024 4.726339 -1.924007  
H O -0.003431 1.911207 -4.219049  
H O -0.898030 3.311584 -3.575759

H O 0.893238 3.310875 -3.577090  
H O 0.003671 1.606646 4.451001  
H O 0.899318 3.048836 3.908992  
H O -0.891941 3.049376 3.910365

SCF Done: E(RB3LYP) = -  
2324.88713770

Sum of electronic and zero-point  
Energies= -2324.538575

Sum of electronic and thermal Energies=  
-2324.512873

Sum of electronic and thermal  
Enthalpies= -2324.511929

Sum of electronic and thermal Free  
Energies= -2324.596228

### 6.1.20.2 Minimum geometry of native BBT under IEFPCM variation of PCM

(B3LYP/6-311++G\*\*, IEFPCM CH<sub>2</sub>Cl<sub>2</sub>)

#p opt freq=noraman rb3lyp/6-311++g(d,p)  
scrf=(iefpcm,solvent=dichloro  
methane) pop=full

0 1

C O 5.454372 -2.354575 -0.304136  
C O 4.597785 -3.440707 -0.068999  
C O 3.231765 -3.250991 0.099021  
C O 2.698992 -1.952066 0.026888  
C O 3.579526 -0.870487 -0.215066  
C O 4.950010 -1.058251 -0.377802  
C O 1.339818 -1.511658 0.184497  
C O 1.192311 -0.163366 0.048858  
S O 2.715496 0.663804 -0.279300  
S O 0.000008 -2.621947 0.602438  
C O -1.339807 -1.511664 0.184499  
C O -1.192308 -0.163370 0.048863  
N O 0.000000 0.556263 0.096736  
C O -2.698981 -1.952077 0.026897  
C O -3.579521 -0.870503 -0.215051  
S O -2.715498 0.663793 -0.279284  
C O -3.231747 -3.251006 0.099027  
C O -4.597767 -3.440728 -0.068989  
C O -5.454360 -2.354599 -0.304122

C O -4.950004 -1.058273 -0.377785  
C O -0.000003 1.985385 0.096334  
C O 0.000001 2.680285 1.321236  
C O -0.000000 4.079205 1.325591  
C O -0.000010 4.758434 0.110438  
C O -0.000018 4.092002 -1.111277  
C O -0.000011 2.692570 -1.121984  
O O -0.000028 1.933300 -2.242582  
C O -0.000040 2.584167 -3.517557  
O O 0.000010 1.908395 2.432631  
C O 0.000016 2.545661 3.714712  
H O 6.517424 -2.522358 -0.431043  
H O 5.008025 -4.442708 -0.016130  
H O 2.579653 -4.098055 0.280145  
H O 5.609329 -0.217726 -0.560736  
H O -2.579631 -4.098068 0.280147  
H O -5.008001 -4.442730 -0.016121  
H O -6.517411 -2.522387 -0.431027  
H O -5.609327 -0.217750 -0.560716  
H O 0.000006 4.633097 2.253317  
H O -0.000014 5.842528 0.115979  
H O -0.000030 4.655175 -2.033376

H O -0.000043 1.783019 -4.253187  
H O -0.895392 3.198262 -3.644517  
H O 0.895305 3.198269 -3.644532  
H O 0.000018 1.736515 4.441561  
H O 0.895363 3.158385 3.848219  
H O -0.895330 3.158386 3.848227  
SCF Done: E(RB3LYP) = -  
2324.89871922

Sum of electronic and zero-point  
Energies= -2324.550188  
Sum of electronic and thermal Energies=  
-2324.524511  
Sum of electronic and thermal  
Enthalpies= -2324.523567  
Sum of electronic and thermal Free  
Energies= -2324.607431

### 6.1.20.3 Minimum geometry of native BBTT under IEFPCM variation of PCM

(PBE1PBE/6-311++G\*\*, IEFPCM CH<sub>2</sub>Cl<sub>2</sub>)

#p opt freq=noraman PBE1PBE/6-  
311++g(d,p) scrf=(iefpcm,solvent=dichlor  
omethane) pop=full geom=check  
guess=read

0 1  
C O 5.434692 -2.317919 -0.274279  
C O 4.586986 -3.411864 -0.064083  
C O 3.223238 -3.235998 0.104928  
C O 2.685098 -1.942411 0.058772  
C O 3.555534 -0.852595 -0.157288  
C O 4.924652 -1.027139 -0.321907  
C O 1.327681 -1.515034 0.218321  
C O 1.183841 -0.166054 0.109265  
S O 2.689741 0.665150 -0.191282  
S O -0.000001 -2.626829 0.604650  
C O -1.327682 -1.515034 0.218320  
C O -1.183842 -0.166054 0.109264  
N O -0.000000 0.550593 0.175616  
C O -2.685099 -1.942410 0.058771  
C O -3.555534 -0.852594 -0.157289  
S O -2.689741 0.665151 -0.191283  
C O -3.223240 -3.235996 0.104928  
C O -4.586988 -3.411862 -0.064084  
C O -5.434693 -2.317917 -0.274280  
C O -4.924653 -1.027137 -0.321908  
C O 0.000000 1.966181 0.072489  
C O 0.000000 2.745010 1.240359  
C O 0.000001 4.137016 1.140254

C O 0.000001 4.720859 -0.119725  
C O 0.000001 3.968919 -1.286990  
C O 0.000001 2.576747 -1.192819  
O O 0.000001 1.738114 -2.242629  
C O 0.000004 2.295387 -3.547901  
O O -0.000000 2.062099 2.397230  
C O -0.000001 2.799029 3.610197  
H O 6.500002 -2.476580 -0.402617  
H O 5.004593 -4.412770 -0.031337  
H O 2.573915 -4.090679 0.267338  
H O 5.578725 -0.177380 -0.486218  
H O -2.573917 -4.090678 0.267338  
H O -5.004595 -4.412768 -0.031338  
H O -6.500004 -2.476577 -0.402618  
H O -5.578725 -0.177378 -0.486219  
H O 0.000000 4.759635 2.025108  
H O 0.000002 5.803497 -0.194758  
H O 0.000002 4.462423 -2.249791  
H O 0.000004 1.447980 -4.231037  
H O -0.895584 2.900688 -3.718004  
H O 0.895592 2.900688 -3.718001  
H O -0.000002 2.056972 4.406550  
H O 0.895530 3.422373 3.693123  
H O -0.895532 3.422374 3.693122

SCF Done: E(RPBE1PBE) = -  
2323.13491391

Sum of electronic and zero-point  
Energies= -2322.782952

Sum of electronic and thermal Energies=  
-2322.757451

Sum of electronic and thermal Free  
Energies= -2322.840394

Sum of electronic and thermal  
Enthalpies= -2322.756507

#### 6.1.20.4 TD-DFT calculation of ground state of native BBTT under IEFPCM variation of PCM

(PBE1PBE/6-311++G\*\*, IEFPCM CH<sub>2</sub>Cl<sub>2</sub>)

#p td=(singlets,nstates=24) PBE1PBE/6-  
311++g(d,p) scrf=(iefpcm,solvent  
=dichloromethane) geom=check  
guess=read

<TDDFT> Excited State 1: Singlet-A  
2.8697 eV 432.04 nm f=0.1620

<TDDFT>HOMO -> LUMO  
96.7%

<TDDFT> Excited State 2: Singlet-A  
3.3854 eV 366.23 nm f=0.0032

<TDDFT>HOMO -> LUMO+1  
96.2%

<TDDFT> Excited State 3: Singlet-A  
3.6890 eV 336.09 nm f=0.0108

<TDDFT>HOMO -> LUMO+3  
83.8%

<TDDFT>HOMO -> LUMO+6 7.1%

<TDDFT>HOMO -> LUMO+11 2.3%

<TDDFT> Excited State 4: Singlet-A  
3.7460 eV 330.98 nm f=0.0130

<TDDFT>HOMO -> LUMO+2  
79.2%

<TDDFT>HOMO -> LUMO+4  
18.3%

<TDDFT> Excited State 5: Singlet-A  
3.7886 eV 327.26 nm f=0.0174

<TDDFT>HOMO -> LUMO+2 5.3%

<TDDFT>HOMO -> LUMO+4  
24.2%

<TDDFT>HOMO -> LUMO+5  
58.7%

<TDDFT>HOMO -> LUMO+7 8.4%

<TDDFT> Excited State 6: Singlet-A  
3.9244 eV 315.93 nm f=0.0060

<TDDFT>HOMO -> LUMO+3  
12.3%

<TDDFT>HOMO -> LUMO+6  
65.5%

<TDDFT>HOMO -> LUMO+8 7.1%

<TDDFT>HOMO -> LUMO+11 9.7%

<TDDFT> Excited State 7: Singlet-A  
3.9506 eV 313.83 nm f=0.1026

<TDDFT>HOMO -> LUMO+2  
12.6%

<TDDFT>HOMO -> LUMO+4  
54.3%

<TDDFT>HOMO -> LUMO+5  
26.6%

<TDDFT>HOMO -> LUMO+7 2.9%

<TDDFT> Excited State 8: Singlet-A  
4.1924 eV 295.73 nm f=0.0055

<TDDFT>HOMO -> LUMO+5 8.9%

<TDDFT>HOMO -> LUMO+7  
65.2%

<TDDFT>HOMO -> LUMO+9  
18.8%

<TDDFT>HOMO -> LUMO+13 2.4%

<TDDFT> Excited State 9: Singlet-A  
4.2614 eV 290.95 nm f=0.0099

<TDDFT>HOMO -> LUMO+6  
12.9%

<TDDFT>HOMO -> LUMO+8  
85.1%

<TDDFT> Excited State 10: Singlet-A  
4.5115 eV 274.82 nm f=0.0013

<TDDFT>HOMO -> LUMO+7  
17.2%

<TDDFT>HOMO -> LUMO+9  
71.1%

<TDDFT>HOMO -> LUMO+12 5.9%

<TDDFT>HOMO -> LUMO+13 2.2%

|                                                                     |                                                                     |
|---------------------------------------------------------------------|---------------------------------------------------------------------|
| <TDDFT> Excited State 11: Singlet-A<br>4.5822 eV 270.58 nm f=0.0565 | <TDDFT>HOMO -> LUMO+14<br>17.0%                                     |
| <TDDFT>HOMO-2 -> LUMO<br>62.8%                                      | <TDDFT>HOMO -> LUMO+15<br>59.4%                                     |
| <TDDFT>HOMO-1 -> LUMO+4 2.2%                                        | <TDDFT> Excited State 17: Singlet-A<br>4.8533 eV 255.47 nm f=0.0116 |
| <TDDFT>HOMO -> LUMO+11<br>10.0%                                     | <TDDFT>HOMO-3 -> LUMO<br>88.3%                                      |
| <TDDFT>HOMO -> LUMO+14 5.1%                                         | <TDDFT>HOMO-3 -> LUMO+1 8.5%                                        |
| <TDDFT>HOMO -> LUMO+15<br>11.7%                                     | <TDDFT> Excited State 18: Singlet-A<br>4.9144 eV 252.29 nm f=0.0765 |
| <TDDFT> Excited State 12: Singlet-A<br>4.6262 eV 268.01 nm f=0.1265 | <TDDFT>HOMO-5 -> LUMO+8 7.7%                                        |
| <TDDFT>HOMO-2 -> LUMO+2 3.9%                                        | <TDDFT>HOMO-3 -> LUMO<br>10.3%                                      |
| <TDDFT>HOMO-1 -> LUMO<br>86.5%                                      | <TDDFT>HOMO-3 -> LUMO+1<br>70.5%                                    |
| <TDDFT> Excited State 13: Singlet-A<br>4.6803 eV 264.90 nm f=0.1403 | <TDDFT>HOMO-1 -> LUMO+1 5.3%                                        |
| <TDDFT>HOMO-2 -> LUMO<br>14.9%                                      | <TDDFT> Excited State 19: Singlet-A<br>4.9833 eV 248.80 nm f=0.0003 |
| <TDDFT>HOMO -> LUMO+6 8.2%                                          | <TDDFT>HOMO-3 -> LUMO+1 3.9%                                        |
| <TDDFT>HOMO -> LUMO+8 3.7%                                          | <TDDFT>HOMO-2 -> LUMO+5 4.2%                                        |
| <TDDFT>HOMO -> LUMO+11<br>63.4%                                     | <TDDFT>HOMO-1 -> LUMO+1<br>50.9%                                    |
| <TDDFT>HOMO -> LUMO+14 2.2%                                         | <TDDFT>HOMO-1 -> LUMO+6 2.7%                                        |
| <TDDFT> Excited State 14: Singlet-A<br>4.7548 eV 260.76 nm f=0.0005 | <TDDFT>HOMO -> LUMO+13<br>30.8%                                     |
| <TDDFT>HOMO -> LUMO+10<br>93.0%                                     | <TDDFT> Excited State 20: Singlet-A<br>4.9853 eV 248.70 nm f=0.0123 |
| <TDDFT>HOMO -> LUMO+17 3.1%                                         | <TDDFT>HOMO-1 -> LUMO+1<br>27.2%                                    |
| <TDDFT> Excited State 15: Singlet-A<br>4.8100 eV 257.77 nm f=0.0035 | <TDDFT>HOMO -> LUMO+9 3.6%                                          |
| <TDDFT>HOMO -> LUMO+7 4.9%                                          | <TDDFT>HOMO -> LUMO+13<br>58.8%                                     |
| <TDDFT>HOMO -> LUMO+9 2.3%                                          | <TDDFT> Excited State 21: Singlet-A<br>5.0190 eV 247.03 nm f=0.0090 |
| <TDDFT>HOMO -> LUMO+12<br>82.4%                                     | <TDDFT>HOMO-2 -> LUMO+1<br>44.4%                                    |
| <TDDFT>HOMO -> LUMO+20 3.4%                                         | <TDDFT>HOMO-1 -> LUMO+4 2.6%                                        |
| <TDDFT> Excited State 16: Singlet-A<br>4.8325 eV 256.56 nm f=0.3322 | <TDDFT>HOMO-1 -> LUMO+5 9.9%                                        |
| <TDDFT>HOMO-2 -> LUMO<br>11.6%                                      | <TDDFT>HOMO -> LUMO+14<br>16.4%                                     |
| <TDDFT>HOMO -> LUMO+6 2.1%                                          | <TDDFT>HOMO -> LUMO+15 7.6%                                         |
| <TDDFT>HOMO -> LUMO+11 2.9%                                         |                                                                     |

|                                     |       |                                     |       |
|-------------------------------------|-------|-------------------------------------|-------|
| <TDDFT>HOMO -> LUMO+18              | 4.1%  | <TDDFT>HOMO-2 -> LUMO+4             | 7.2%  |
| <TDDFT>HOMO -> LUMO+24              | 4.4%  | <TDDFT>HOMO-1 -> LUMO               | 2.5%  |
| <TDDFT> Excited State 22: Singlet-A |       | <TDDFT>HOMO-1 -> LUMO+3             | 21.9% |
| 5.0337 eV 246.31 nm f=0.0039        |       | <TDDFT> Excited State 24: Singlet-A |       |
| <TDDFT>HOMO-2 -> LUMO+1             | 30.5% | 5.1296 eV 241.70 nm f=0.0052        |       |
| <TDDFT>HOMO -> LUMO+11              | 3.6%  | <TDDFT>HOMO-2 -> LUMO+1             | 3.1%  |
| <TDDFT>HOMO -> LUMO+14              | 37.7% | <TDDFT>HOMO-1 -> LUMO+5             | 5.1%  |
| <TDDFT>HOMO -> LUMO+15              | 11.4% | <TDDFT>HOMO -> LUMO+14              | 17.3% |
| <TDDFT>HOMO -> LUMO+18              | 3.6%  | <TDDFT>HOMO -> LUMO+15              | 3.4%  |
| <TDDFT>HOMO -> LUMO+24              | 3.8%  | <TDDFT>HOMO -> LUMO+18              | 40.3% |
| <TDDFT> Excited State 23: Singlet-A |       | <TDDFT>HOMO -> LUMO+22              | 2.5%  |
| 5.0534 eV 245.35 nm f=0.0183        |       | <TDDFT>HOMO -> LUMO+24              | 19.3% |
| <TDDFT>HOMO-4 -> LUMO               | 54.6% |                                     |       |

#### 6.1.20.5 Minimum geometry of excited state of native BBTT under IEFPCM variation of PCM

(PBE1PBE/6-311++G\*\*, IEFPCM CH<sub>2</sub>Cl<sub>2</sub>)

```

#p opt td=(nstates=4) PBE1PBE/6-
311++g(d,p) freq scrf=(iefpcm,solvent=
dichloromethane) geom=check
guess=read
0 1
C 0 5.477400 -2.300541 -0.000058
C 0 4.622415 -3.405740 -0.000066
C 0 3.245091 -3.250297 -0.000055
C 0 2.689234 -1.955741 -0.000024
C 0 3.575513 -0.848294 -0.000022
C 0 4.949939 -1.006439 -0.000038
C 0 1.329685 -1.542730 -0.000010
C 0 1.184074 -0.134608 -0.000012
S 0 2.723185 0.698864 0.000017
S 0 -0.000001 -2.630791 0.000196
C 0 -1.329686 -1.542729 -0.000008
C 0 -1.184075 -0.134607 -0.000010
N 0 0.000000 0.531523 -0.000020
C 0 -2.689235 -1.955739 -0.000022
C 0 -3.575514 -0.848292 -0.000018
S 0 -2.723185 0.698866 0.000021
C 0 -3.245093 -3.250295 -0.000053
C 0 -4.622417 -3.405737 -0.000064
C 0 -5.477402 -2.300537 -0.000055
C 0 -4.949940 -1.006436 -0.000035
C 0 0.000001 1.960525 -0.000004
C 0 0.000003 2.646181 1.222347
C 0 0.000004 4.041303 1.217058
C 0 0.000003 4.709919 0.000013
C 0 -0.000000 4.041316 -1.217037
C 0 -0.000001 2.646192 -1.222349
O 0 -0.000004 1.878724 -2.323219
C 0 -0.000006 2.521445 -3.589787
O 0 0.000005 1.878695 2.323213
C 0 0.000008 2.521394 3.589789
H 0 6.552510 -2.442206 -0.000067
H 0 5.042665 -4.406489 -0.000087
H 0 2.598148 -4.122143 -0.000070
H 0 5.607364 -0.143256 -0.000035
H 0 -2.598151 -4.122141 -0.000068

```

H O -5.042668 -4.406485 -0.000084  
H O -6.552512 -2.442202 -0.000063  
H O -5.607365 -0.143252 -0.000031  
H O 0.000007 4.600132 2.143344  
H O 0.000004 5.794975 0.000018  
H O -0.000001 4.600157 -2.143317  
H O -0.000008 1.720466 -4.326570  
H O -0.895909 3.136003 -3.718585  
H O 0.895896 3.136003 -3.718589  
H O 0.000009 1.720409 4.326566

H O 0.895910 3.135951 3.718600  
H O -0.895892 3.135953 3.718604

SCF Done: E(RPBE1PBE) = -  
2323.12400312

Sum of electronic and zero-point  
Energies= -2322.693963

Sum of electronic and thermal Energies=  
-2322.667564

Sum of electronic and thermal  
Enthalpies= -2322.666620

Sum of electronic and thermal Free  
Energies= -2322.752904

### 6.1.20.6 TD-DFT calculation of excited state of native BBTT under IEFPCM variation of PCM

(PBE1PBE/6-311++G\*\*, IEFPCM CH<sub>2</sub>Cl<sub>2</sub>)

#p opt td=(nstates=4) PBE1PBE/6-  
311++g(d,p) freq scrf=(iefpcm,solvent=  
dichloromethane) geom=check  
guess=read  
<TDDFT> Excited State 1: Singlet-A  
2.2344 eV 554.89 nm f=0.1315  
<TDDFT>HOMO -> LUMO  
98.3%  
<TDDFT> Excited State 2: Singlet-A  
3.0161 eV 411.07 nm f=0.0000  
<TDDFT>HOMO -> LUMO+1  
98.2%

<TDDFT> Excited State 3: Singlet-A  
3.3784 eV 366.99 nm f=0.0001

<TDDFT>HOMO -> LUMO+5  
93.9%

<TDDFT>HOMO -> LUMO+6 3.6%

<TDDFT> Excited State 4: Singlet-A  
3.3981 eV 364.86 nm f=0.0114

<TDDFT>HOMO -> LUMO+2  
79.0%

<TDDFT>HOMO -> LUMO+4  
19.2%

### 6.1.20.7 Minimum geometry of native BBTT under SMD variation of PCM (B3LYP/6-311++G\*\*,

SMD CH<sub>2</sub>Cl<sub>2</sub>)

#p opt freq=norman rb3lyp/6-311++g(d,p)  
scrf=(smd,solvent=dichloromet  
hane) pop=full geom=checkpoint  
guess=read  
0 1  
C O 5.470625 -2.338195 -0.253408  
C O 4.612325 -3.431495 -0.061881  
C O 3.241975 -3.250055 0.079267  
C O 2.706454 -1.950999 0.023763  
C O 3.589552 -0.862340 -0.173248  
C O 4.963976 -1.041657 -0.309710  
C O 1.342063 -1.517871 0.156363  
C O 1.192195 -0.167378 0.047032

S O 2.720960 0.671197 -0.222805  
S O 0.000007 -2.649310 0.508343  
C O -1.342060 -1.517870 0.156413  
C O -1.192195 -0.167377 0.047082  
N O 0.000001 0.551613 0.088666  
C O -2.706452 -1.951000 0.023833  
C O -3.589555 -0.862342 -0.173166  
S O -2.720970 0.671199 -0.222704  
C O -3.241968 -3.250058 0.079330  
C O -4.612320 -3.431501 -0.061810  
C O -5.470623 -2.338203 -0.253325  
C O -4.963979 -1.041663 -0.309624



|     |           |           |           |                                         |           |          |           |
|-----|-----------|-----------|-----------|-----------------------------------------|-----------|----------|-----------|
| C 0 | 0.000001  | 1.981398  | 0.078388  | H 0                                     | 0.000106  | 4.645972 | 2.215067  |
| C 0 | 0.000054  | 2.685097  | 1.299105  | H 0                                     | 0.000002  | 5.837948 | 0.067486  |
| C 0 | 0.000059  | 4.084414  | 1.291593  | H 0                                     | -0.000104 | 4.634194 | -2.073257 |
| C 0 | 0.000001  | 4.753289  | 0.070513  | H 0                                     | -0.000228 | 1.740096 | -4.270928 |
| C 0 | -0.000057 | 4.077948  | -1.146598 | H 0                                     | -0.896441 | 3.160836 | -3.677478 |
| C 0 | -0.000053 | 2.678198  | -1.146934 | H 0                                     | 0.896093  | 3.160810 | -3.677580 |
| O 0 | -0.000113 | 1.910178  | -2.259597 | H 0                                     | 0.000220  | 1.763633 | 4.427488  |
| C 0 | -0.000175 | 2.549351  | -3.542602 | H 0                                     | 0.896424  | 3.181245 | 3.826081  |
| O 0 | 0.000112  | 1.922414  | 2.415187  | H 0                                     | -0.896093 | 3.181218 | 3.826176  |
| C 0 | 0.000168  | 2.568958  | 3.694812  | SCF Done: E(RB3LYP) = -                 |           |          |           |
| H 0 | 6.537111  | -2.500289 | -0.359582 | 2324.92171459                           |           |          |           |
| H 0 | 5.024622  | -4.433507 | -0.021685 | Sum of electronic and zero-point        |           |          |           |
| H 0 | 2.591558  | -4.105115 | 0.227942  | Energies= -2324.573159                  |           |          |           |
| H 0 | 5.625337  | -0.195698 | -0.459282 | Sum of electronic and thermal Energies= |           |          |           |
| H 0 | -2.591548 | -4.105117 | 0.227991  | -2324.547525                            |           |          |           |
| H 0 | -5.024613 | -4.433515 | -0.021619 | Sum of electronic and thermal           |           |          |           |
| H 0 | -6.537110 | -2.500299 | -0.359492 | Enthalpies= -2324.546581                |           |          |           |
| H 0 | -5.625344 | -0.195705 | -0.459183 | Sum of electronic and thermal Free      |           |          |           |
|     |           |           |           | Energies= -2324.630484                  |           |          |           |

#### 6.1.20.8 Minimum geometry of radical cation of BBTT in gas phase (B3LYP/6-311++G\*\*)

```
#p opt freq=noraman ub3lyp/6-311++g(d,p) pop=full
0 1
```

|     |           |           |           |     |           |           |           |
|-----|-----------|-----------|-----------|-----|-----------|-----------|-----------|
| C 0 | -5.481580 | -2.287456 | -0.000097 | S 0 | 2.715174  | 0.698430  | 0.000059  |
| C 0 | -4.631043 | -3.403868 | -0.000103 | C 0 | 3.254788  | -3.247284 | 0.000078  |
| C 0 | -3.254728 | -3.247333 | -0.000085 | C 0 | 4.631105  | -3.403796 | 0.000094  |
| C 0 | -2.712579 | -1.950412 | -0.000070 | C 0 | 5.481624  | -2.287370 | 0.000092  |
| C 0 | -3.585279 | -0.839035 | -0.000076 | C 0 | 4.967969  | -0.994526 | 0.000085  |
| C 0 | -4.967946 | -0.994604 | -0.000084 | C 0 | -0.000008 | 1.971196  | 0.000000  |
| C 0 | -1.337260 | -1.534839 | -0.000011 | C 0 | 0.000075  | 2.656028  | -1.228768 |
| C 0 | -1.190617 | -0.155075 | -0.000008 | C 0 | 0.000049  | 4.053298  | -1.220613 |
| S 0 | -2.715179 | 0.698388  | -0.000054 | C 0 | -0.000066 | 4.722851  | -0.000002 |
| S 0 | 0.000023  | -2.655522 | 0.000001  | C 0 | -0.000156 | 4.053299  | 1.220611  |
| C 0 | 1.337291  | -1.534821 | 0.000009  | C 0 | -0.000134 | 2.656028  | 1.228769  |
| C 0 | 1.190626  | -0.155059 | 0.000011  | O 0 | -0.000206 | 1.876881  | 2.330368  |
| N 0 | 0.000000  | 0.528243  | 0.000001  | C 0 | -0.000359 | 2.501011  | 3.622137  |
| C 0 | 2.712617  | -1.950371 | 0.000068  | O 0 | 0.000170  | 1.876884  | -2.330368 |
| C 0 | 3.585299  | -0.838980 | 0.000078  | C 0 | 0.000327  | 2.501027  | -3.622130 |
|     |           |           |           | H 0 | -6.555160 | -2.432024 | -0.000097 |
|     |           |           |           | H 0 | -5.057123 | -4.399523 | -0.000119 |
|     |           |           |           | H 0 | -2.607066 | -4.116728 | -0.000109 |

H O -5.629282 -0.136745 -0.000082  
H O 2.607140 -4.116690 0.000099  
H O 5.057202 -4.399444 0.000106  
H O 6.555206 -2.431920 0.000091  
H O 5.629290 -0.136656 0.000087  
H O 0.000097 4.613181 -2.144614  
H O -0.000083 5.806614 -0.000002  
H O -0.000227 4.613184 2.144610  
H O -0.000480 1.683348 4.338838  
H O 0.896203 3.110472 3.759544  
H O -0.896928 3.110514 3.759324

H O 0.000494 1.683370 -4.338837  
H O -0.896255 3.110456 -3.759547  
H O 0.896876 3.110565 -3.759296

SCF Done: E(UB3LYP) = -  
2324.67872265

Sum of electronic and zero-point  
Energies= -2324.329056

Sum of electronic and thermal Energies=  
-2324.303582

Sum of electronic and thermal  
Enthalpies= -2324.302638

Sum of electronic and thermal Free  
Energies= -2324.385693

### 6.1.20.9 Minimum geometry of radical cation of BBTT under IEFPCM variation of PCM

(B3LYP/6-311++G\*\*, IEFPCM CH<sub>2</sub>Cl<sub>2</sub>)

#p ub3lyp/6-311++g(d,p) opt  
freq=noraman scf=maxcycle=1000  
scrf=(iefpcm,solvent=dichloromethane)  
geom=check guess=read

0 1

C O -5.482498 -2.284887 -0.000021  
C O -4.632167 -3.402009 -0.000012  
C O -3.254876 -3.246749 -0.000006  
C O -2.712125 -1.950110 -0.000009  
C O -3.584235 -0.837961 -0.000017  
C O -4.967724 -0.992056 -0.000024  
C O -1.335563 -1.536653 -0.000004  
C O -1.189859 -0.157417 -0.000005  
S O -2.713291 0.698456 -0.000014  
S O -0.000008 -2.657461 0.000000  
C O 1.335554 -1.536659 0.000003  
C O 1.189856 -0.157423 0.000005  
N O -0.000000 0.526013 0.000000  
C O 2.712114 -1.950122 0.000008  
C O 3.584229 -0.837977 0.000017  
S O 2.713291 0.698443 0.000015  
C O 3.254859 -3.246764 0.000004  
C O 4.632150 -3.402030 0.000011  
C O 5.482485 -2.284911 0.000021

C O 4.967717 -0.992078 0.000024  
C O 0.000004 1.968759 0.000000  
C O 0.000020 2.653566 -1.228707  
C O 0.000027 4.051097 -1.221118  
C O 0.000015 4.720396 0.000000  
C O -0.000003 4.051097 1.221118  
C O -0.000008 2.653566 1.228707  
O O -0.000022 1.876108 2.331531  
C O -0.000063 2.505004 3.622528  
O O 0.000027 1.876109 -2.331531  
C O 0.000091 2.505006 -3.622527  
H O -6.556265 -2.428167 -0.000027  
H O -5.058187 -4.397764 -0.000010  
H O -2.607781 -4.116030 0.000001  
H O -5.627356 -0.133273 -0.000031  
H O 2.607760 -4.116042 -0.000003  
H O 5.058164 -4.397786 0.000008  
H O 6.556252 -2.428196 0.000027  
H O 5.627352 -0.133298 0.000033  
H O 0.000041 4.610228 -2.145377  
H O 0.000020 5.804111 0.000000  
H O -0.000012 4.610229 2.145377  
H O -0.000088 1.689368 4.341379

H O 0.895996 3.115073 3.756591  
H O -0.896128 3.115076 3.756533  
H O 0.000116 1.689372 -4.341379  
H O -0.895959 3.115086 -3.756600  
H O 0.896165 3.115069 -3.756519  
SCF Done: E(UB3LYP) = -  
2324.72683778

Sum of electronic and zero-point  
Energies= -2324.377352  
Sum of electronic and thermal Energies=  
-2324.351815  
Sum of electronic and thermal  
Enthalpies= -2324.350871  
Sum of electronic and thermal Free  
Energies= -2324.434437

#### 6.1.20.10 Minimum geometry of radical cation of BBTT under SMD variation of PCM

(B3LYP/6-311++G\*\*, SMD CH<sub>2</sub>Cl<sub>2</sub>)

#p opt freq=norman ub3lyp/6-  
311++g(d,p) pop=full  
scrf=(SMD,solvent=di  
chloromethane)  
O 1  
C O 5.480242 -2.290084 0.028172  
C O 4.628056 -3.405708 0.021093  
C O 3.250991 -3.248555 0.013921  
C O 2.711928 -1.950342 0.013755  
C O 3.586038 -0.839968 0.020987  
C O 4.969020 -0.995489 0.028247  
C O 1.336719 -1.534235 0.006437  
C O 1.189313 -0.155660 0.007109  
S O 2.715100 0.698616 0.018796  
S O 0.000010 -2.655189 -0.000002  
C O -1.336704 -1.534241 -0.006446  
C O -1.189307 -0.155666 -0.007120  
N O 0.000001 0.528223 -0.000006  
C O -2.711909 -1.950360 -0.013759  
C O -3.586028 -0.839993 -0.020991  
S O -2.715102 0.698600 -0.018806  
C O -3.250958 -3.248577 -0.013921  
C O -4.628022 -3.405745 -0.021089  
C O -5.480218 -2.290129 -0.028169  
C O -4.969009 -0.995528 -0.028248  
C O -0.000001 1.971655 0.000001  
C O -0.025208 2.655668 1.229841  
C O -0.024143 4.053402 1.221518  
C O -0.000018 4.721879 0.000016

C O 0.024113 4.053415 -1.221492  
C O 0.025191 2.655680 -1.229833  
O O 0.047352 1.877742 -2.331161  
C O 0.098936 2.506338 -3.623804  
O O -0.047364 1.877719 2.331162  
C O -0.099000 2.506311 3.623803  
H O 6.553947 -2.436027 0.033545  
H O 5.052701 -4.402389 0.021091  
H O 2.602887 -4.117828 0.008208  
H O 5.632057 -0.138508 0.033617  
H O -2.602845 -4.117844 -0.008206  
H O -5.052658 -4.402429 -0.021084  
H O -6.553922 -2.436082 -0.033540  
H O -5.632056 -0.138554 -0.033619  
H O -0.041325 4.613397 2.145583  
H O -0.000022 5.806232 0.000022  
H O 0.041285 4.613422 -2.145549  
H O 0.109764 1.689233 -4.342498  
H O -0.783652 3.128460 -3.789088  
H O 1.009074 3.101614 -3.729347  
H O -0.109826 1.689205 4.342496  
H O 0.783566 3.128456 3.789115  
H O -1.009157 3.101565 3.729319  
SCF Done: E(UB3LYP) = -  
2324.75359912  
Sum of electronic and zero-point  
Energies= -2324.403886  
Sum of electronic and thermal Energies=  
-2324.378512

Sum of electronic and thermal  
Enthalpies= -2324.377568

Sum of electronic and thermal Free  
Energies= -2324.460623

6.1.20.11 Transition state of native BTT under IEFPCM variation of PCM

(B3LYP/6-311++G\*\*, IEFPCM CH<sub>2</sub>Cl<sub>2</sub>)

#p opt=(ts,noeigen,calcfc,tight)  
freq=noraman b3lyp/6-311++g(d,p) scrf  
=(iefpcm,solvent=dichloromethane)

0 1  
C 0 -5.502930 -2.301182 -0.000000  
C 0 -4.642180 -3.408926 -0.000001  
C 0 -3.262686 -3.242968 -0.000004  
C 0 -2.721339 -1.945292 -0.000006  
C 0 -3.607081 -0.841346 -0.000006  
C 0 -4.989802 -1.005864 -0.000002  
C 0 -1.345080 -1.531559 -0.000009  
C 0 -1.193235 -0.177113 -0.000010  
S 0 -2.730139 0.686919 -0.000009  
S 0 -0.000003 -2.713450 -0.000016  
C 0 1.345076 -1.531562 -0.000011  
C 0 1.193233 -0.177115 -0.000010  
N 0 0.000000 0.540883 -0.000016  
C 0 2.721335 -1.945297 -0.000005  
C 0 3.607079 -0.841352 0.000000  
S 0 2.730140 0.686914 -0.000002  
C 0 3.262680 -3.242973 -0.000005  
C 0 4.642173 -3.408934 0.000000  
C 0 5.502925 -2.301191 0.000006  
C 0 4.989800 -1.005872 0.000006  
C 0 0.000001 1.969115 0.000001  
C 0 0.000004 2.669721 -1.221981  
C 0 0.000006 4.068840 -1.218746  
C 0 0.000006 4.741300 0.000033  
C 0 0.000003 4.068813 1.218796  
C 0 0.000000 2.669694 1.221999

O 0 -0.000003 1.903212 2.337031  
O 0 0.000003 1.903265 -2.337031  
C 0 0.000017 2.546349 -3.616303  
C 0 -0.000007 2.546266 3.616319  
H 0 -6.576227 -2.450641 0.000002  
H 0 -5.059287 -4.409472 0.000001  
H 0 -2.608833 -4.107945 -0.000004  
H 0 -5.652914 -0.148625 -0.000002  
H 0 2.608825 -4.107949 -0.000010  
H 0 5.059278 -4.409481 0.000000  
H 0 6.576222 -2.450652 0.000010  
H 0 5.652913 -0.148634 0.000010  
H 0 0.000008 4.627692 -2.143498  
H 0 0.000009 5.825415 0.000045  
H 0 0.000004 4.627644 2.143561  
H 0 0.895410 3.159586 -3.746843  
H 0 0.000018 1.740564 -4.346846  
H 0 -0.895369 3.159594 -3.746858  
H 0 -0.000022 1.740463 4.346843  
H 0 0.895388 3.159493 3.746888  
H 0 -0.895390 3.159513 3.746873

SCF Done: E(RB3LYP) = -  
2324.89856337

Sum of electronic and zero-point  
Energies= -2324.550109

Sum of electronic and thermal Energies=  
-2324.525312

Sum of electronic and thermal  
Enthalpies= -2324.524368

Sum of electronic and thermal Free  
Energies= -2324.604854

## 6.2 *anti-anti-N-para*-substituted-phenyl-BBTT

### 6.2.1 *anti-anti-N-para*-cyanophenyl-BBTT

#### 6.2.1.1 Minimum geometry of native BBTT under IEFPCM variation of PCM

(B3LYP/6-311++G\*\*, IEFPCM CH<sub>2</sub>Cl<sub>2</sub>)

```
#p opt=verytight int=ultrafine
freq=noraman rb3lyp/6-311++g(d,p) scrf=
(iefpcm,solvent=dichloromethane)
pop=full
0 1
C 0 -2.919510 -5.038823 0.278623
C 0 -3.447568 -4.287939 -0.784635
C 0 -2.909430 -3.054007 -1.119249
C 0 -1.822281 -2.554672 -0.384527
C 0 -1.310756 -3.317621 0.691731
C 0 -1.848387 -4.562250 1.025055
C 0 -1.088663 -1.324728 -0.549610
C 0 -0.065875 -1.175282 0.334382
S 0 0.016875 -2.499272 1.508499
S 0 -1.519013 0.000000 -1.662601
C 0 -1.088662 1.324729 -0.549610
C 0 -0.065875 1.175282 0.334382
N 0 0.716266 -0.000000 0.422742
C 0 -1.822280 2.554673 -0.384527
C 0 -1.310755 3.317621 0.691731
S 0 0.016876 2.499271 1.508499
C 0 -2.909428 3.054009 -1.119249
C 0 -3.447566 4.287941 -0.784635
C 0 -2.919507 5.038825 0.278624
C 0 -1.848384 4.562251 1.025056
C 0 2.097389 -0.000001 0.127089
C 0 2.800013 1.209451 -0.022010
C 0 4.158867 1.208279 -0.289125
C 0 4.859644 -0.000001 -0.420478
C 0 4.158867 -1.208281 -0.289123
C 0 2.800013 -1.209452 -0.022009
C 0 6.259369 -0.000001 -0.691210
N 0 7.395910 -0.000002 -0.910833
H 0 -3.353251 -6.001051 0.524271
H 0 -4.285588 -4.678448 -1.349896
H 0 -3.320759 -2.478014 -1.940199
H 0 -1.446142 -5.140245 1.848446
H 0 -3.320758 2.478016 -1.940199
H 0 -4.285585 4.678451 -1.349895
H 0 -3.353248 6.001053 0.524272
H 0 -1.446139 5.140245 1.848446
H 0 2.287091 2.156122 0.062247
H 0 4.680420 2.150578 -0.401765
H 0 4.680419 -2.150580 -0.401763
H 0 2.287090 -2.156123 0.062249
SCF Done: E(RB3LYP) = -
2188.05490327
Sum of electronic and zero-point
Energies= -2187.772054
Sum of electronic and thermal Energies=
-2187.750159
Sum of electronic and thermal
Enthalpies= -2187.749215
Sum of electronic and thermal Free
Energies= -2187.824810
```

#### 6.2.1.2 Minimum geometry of radical cation of BBTT under IEFPCM variation of PCM

(B3LYP/6-311++G\*\*, IEFPCM CH<sub>2</sub>Cl<sub>2</sub>)

```
#p ub3lyp/6-311++g(d,p) opt
freq=noraman scf=maxcycle=1000
scrf=(iefpc
m,solvent=dichloromethane)
0 1
C 0 -5.482014 -2.339393 0.000068
C 0 -4.628687 -3.454185 0.000386
C 0 -3.252113 -3.295502 0.000374
```

|     |           |           |           |                                         |              |           |           |
|-----|-----------|-----------|-----------|-----------------------------------------|--------------|-----------|-----------|
| C 0 | -2.713317 | -1.997142 | 0.000028  | C 0                                     | 0.008512     | 6.122885  | 0.000250  |
| C 0 | -3.588637 | -0.888219 | -0.000253 | N 0                                     | 0.010100     | 7.277816  | 0.000323  |
| C 0 | -4.971653 | -1.044976 | -0.000255 | H 0                                     | -6.555293    | -2.485735 | 0.000089  |
| C 0 | -1.337857 | -1.580686 | 0.000058  | H 0                                     | -5.052100    | -4.450959 | 0.000666  |
| C 0 | -1.194682 | -0.200892 | -0.000196 | H 0                                     | -2.602884    | -4.163124 | 0.000621  |
| S 0 | -2.722446 | 0.650259  | -0.000518 | H 0                                     | -5.633761    | -0.188222 | -0.000478 |
| S 0 | -0.003791 | -2.702482 | 0.000176  | H 0                                     | 2.591805     | -4.170349 | 0.000153  |
| C 0 | 1.333435  | -1.584432 | 0.000041  | H 0                                     | 5.040205     | -4.464472 | 0.000014  |
| C 0 | 1.194011  | -0.204240 | -0.000029 | H 0                                     | 6.548522     | -2.503183 | -0.000129 |
| N 0 | 0.000626  | 0.479610  | -0.000119 | H 0                                     | 5.632887     | -0.203221 | -0.000182 |
| C 0 | 2.707779  | -2.004601 | 0.000053  | H 0                                     | 0.002844     | 2.055943  | 2.149998  |
| C 0 | 3.586031  | -0.897986 | -0.000053 | H 0                                     | 0.006296     | 4.540355  | 2.154235  |
| S 0 | 2.724017  | 0.642746  | -0.000132 | H 0                                     | 0.006385     | 4.540634  | -2.153916 |
| C 0 | 3.243225  | -3.304366 | 0.000074  | H 0                                     | 0.002992     | 2.056213  | -2.149990 |
| C 0 | 4.619388  | -3.466599 | 0.000010  | SCF Done: E(UB3LYP) = -                 |              |           |           |
| C 0 | 5.475630  | -2.354036 | -0.000080 | 2187.87382936                           |              |           |           |
| C 0 | 4.968625  | -1.058303 | -0.000113 | Sum of electronic and zero-point        |              |           |           |
| C 0 | 0.002719  | 1.933043  | -0.000012 | Energies=                               | -2187.590657 |           |           |
| C 0 | 0.003626  | 2.607882  | 1.218732  | Sum of electronic and thermal Energies= | -2187.568582 |           |           |
| C 0 | 0.005558  | 3.997003  | 1.218579  | Sum of electronic and thermal           |              |           |           |
| C 0 | 0.006542  | 4.690506  | 0.000168  | Enthalpies=                             | -2187.567638 |           |           |
| C 0 | 0.005612  | 3.997164  | -1.218328 | Sum of electronic and thermal Free      |              |           |           |
| C 0 | 0.003690  | 2.608038  | -1.218657 | Energies=                               | -2187.644848 |           |           |

## 6.2.2 *anti-anti-N-para*-chlorophenyl-BBTT

### 6.2.2.1 Minimum geometry of native BBTT under IEFPCM variation of PCM

(B3LYP/6-311++G\*\*, IEFPCM CH<sub>2</sub>Cl<sub>2</sub>)

|                                          |          |           |           |           |           |           |           |
|------------------------------------------|----------|-----------|-----------|-----------|-----------|-----------|-----------|
| #p opt freq=noraman rb3lyp/6-311++g(d,p) | C 0      | 0.274707  | -1.192301 | 0.067334  |           |           |           |
| scrf=(iefpcm,solvent=dichloro            | S 0      | -0.453177 | -2.680538 | -0.549874 |           |           |           |
| methane) pop=full                        | S 0      | 2.567328  | 0.003151  | 1.047861  |           |           |           |
| 0 1                                      | C 0      | 1.595115  | 1.335654  | 0.356471  |           |           |           |
| C 0                                      | 2.626949 | -5.348614 | -0.464710 | C 0       | 0.271681  | 1.192604  | 0.067298  |
| C 0                                      | 3.648931 | -4.504258 | -0.004134 | N 0       | -0.450749 | -0.000833 | 0.133785  |
| C 0                                      | 3.397377 | -3.168641 | 0.281894  | C 0       | 2.095427  | 2.659858  | 0.100755  |
| C 0                                      | 2.102406 | -2.654690 | 0.100776  | C 0       | 1.077856  | 3.522411  | -0.372053 |
| C 0                                      | 1.087150 | -3.520127 | -0.371747 | S 0       | -0.460095 | 2.678723  | -0.550208 |
| C 0                                      | 1.335478 | -4.862679 | -0.650334 | C 0       | 3.388976  | 3.177401  | 0.281899  |
| C 0                                      | 1.598559 | -1.331823 | 0.356365  | C 0       | 3.636882  | 4.513636  | -0.004325 |

|      |           |           |           |                                         |           |              |           |
|------|-----------|-----------|-----------|-----------------------------------------|-----------|--------------|-----------|
| C O  | 2.612647  | 5.355122  | -0.465193 | H O                                     | 2.824906  | 6.395574     | -0.681316 |
| C O  | 1.322567  | 4.865632  | -0.650923 | H O                                     | 0.531156  | 5.513454     | -1.009277 |
| C O  | -1.889684 | -0.002507 | 0.144365  | H O                                     | -2.007360 | -0.000437    | 2.290054  |
| C O  | -2.568488 | -0.001983 | 1.363545  | H O                                     | -4.494161 | -0.003046    | 2.327966  |
| C O  | -3.959728 | -0.003437 | 1.386957  | H O                                     | -4.551357 | -0.007521    | -1.970120 |
| C O  | -4.654656 | -0.005422 | 0.180159  | H O                                     | -2.068312 | -0.004763    | -2.000944 |
| C O  | -3.992867 | -0.005989 | -1.043294 | SCF Done: E(RB3LYP) = -                 |           |              |           |
| C O  | -2.599692 | -0.004488 | -1.056980 | 2555.40668359                           |           |              |           |
| Cl O | -6.414129 | -0.007228 | 0.203926  | Sum of electronic and zero-point        |           |              |           |
| H O  | 2.842018  | -6.388483 | -0.680763 | Energies=                               |           | -2555.132567 |           |
| H O  | 4.648562  | -4.900743 | 0.131842  | Sum of electronic and thermal Energies= |           | -2555.110958 |           |
| H O  | 4.192486  | -2.523586 | 0.638319  | Sum of electronic and thermal           |           |              |           |
| H O  | 0.545811  | -5.512779 | -1.008418 | Enthalpies=                             |           | -2555.110014 |           |
| H O  | 4.185853  | 2.534611  | 0.638473  | Sum of electronic and thermal Free      |           |              |           |
| H O  | 4.635395  | 4.912876  | 0.131736  | Energies=                               |           | -2555.186001 |           |

#### 6.2.2.2 Minimum geometry of radical cation of BBTT under IEFPCM variation of PCM

(B3LYP/6-311++G\*\*, IEFPCM CH<sub>2</sub>Cl<sub>2</sub>)

```
#p ub3lyp/6-311++g(d,p) opt
freq=noraman scf=maxcycle=1000
scrf=(iefpc
m,solvent=dichloromethane)
0 1
```

|     |           |           |           |      |           |           |           |
|-----|-----------|-----------|-----------|------|-----------|-----------|-----------|
| C O | 2.395252  | 5.500970  | 0.000289  | S O  | -0.521579 | -2.726405 | -0.000324 |
| C O | 3.517655  | 4.657592  | 0.000024  | C O  | 3.429664  | -3.218364 | 0.000139  |
| C O | 3.371285  | 3.279592  | -0.000147 | C O  | 3.601929  | -4.593340 | -0.000002 |
| C O | 2.077784  | 2.729060  | -0.000008 | C O  | 2.495424  | -5.457428 | -0.000274 |
| C O | 0.960865  | 3.594368  | 0.000160  | C O  | 1.196186  | -4.959490 | -0.000380 |
| C O | 1.105599  | 4.978762  | 0.000326  | C O  | -1.831532 | -0.016409 | -0.000017 |
| C O | 1.672992  | 1.350063  | -0.000152 | C O  | -2.510435 | -0.023694 | 1.216351  |
| C O | 0.294312  | 1.194986  | -0.000162 | C O  | -3.901420 | -0.035480 | 1.216686  |
| S O | -0.570028 | 2.715093  | 0.000051  | C O  | -4.579815 | -0.039673 | 0.000064  |
| S O | 2.805130  | 0.024396  | 0.000243  | C O  | -3.901504 | -0.032572 | -1.216588 |
| C O | 1.696523  | -1.320906 | 0.000112  | C O  | -2.510511 | -0.020753 | -1.216337 |
| C O | 0.315332  | -1.190739 | -0.000026 | Cl O | -6.332623 | -0.053969 | 0.000088  |
| N O | -0.378153 | -0.003901 | -0.000045 | H O  | 2.531997  | 6.575536  | 0.000471  |
| C O | 2.126148  | -2.692263 | 0.000025  | H O  | 4.510642  | 5.089882  | -0.000080 |
| C O | 1.025405  | -3.577988 | -0.000198 | H O  | 4.244839  | 2.638296  | -0.000409 |
|     |           |           |           | H O  | 0.242727  | 5.632899  | 0.000529  |
|     |           |           |           | H O  | 4.290743  | -2.560452 | 0.000344  |
|     |           |           |           | H O  | 4.602804  | -5.007024 | 0.000105  |
|     |           |           |           | H O  | 2.652127  | -6.529268 | -0.000422 |
|     |           |           |           | H O  | 0.345981  | -5.630058 | -0.000629 |

H O -1.961934 -0.019994 2.150016  
H O -4.447595 -0.041164 2.150452  
H O -4.447755 -0.036113 -2.150322  
H O -1.962114 -0.014864 -2.150047  
SCF Done: E(UB3LYP) = -  
2555.22987215

Sum of electronic and zero-point  
Energies= -2554.954937  
Sum of electronic and thermal Energies=  
-2554.933470  
Sum of electronic and thermal  
Enthalpies= -2554.932526  
Sum of electronic and thermal Free  
Energies= -2555.008364

## 6.2.3 anti-anti-N-para-fluorophenyl-BBTT

### 6.2.3.1 Minimum geometry of native BBTT under IEFPCM variation of PCM

(B3LYP/6-311++G\*\*, IEFPCM CH<sub>2</sub>Cl<sub>2</sub>)

#p opt freq=noraman rb3lyp/6-311++g(d,p)  
scrf=(iefpcm,solvent=dichloro  
methane) pop=full

O 1  
C O -5.352724 -2.348514 -0.479077  
C O -4.509104 -3.378662 -0.035664  
C O -3.172727 -3.133453 0.252360  
C O -2.657123 -1.836508 0.090703  
C O -3.521933 -0.812813 -0.364527  
C O -4.865205 -1.054964 -0.645177  
C O -1.333030 -1.338611 0.351401  
C O -1.191974 -0.010647 0.082238  
S O -2.680511 0.728932 -0.519955  
S O 0.001090 -2.319837 1.026887  
C O 1.334362 -1.337414 0.351423  
C O 1.192126 -0.009576 0.082208  
N O -0.000211 0.713279 0.158064  
C O 2.658909 -1.834156 0.090863  
C O 3.522872 -0.809724 -0.364298  
S O 2.680111 0.731307 -0.519821  
C O 3.175663 -3.130636 0.252629  
C O 4.512285 -3.374665 -0.035266  
C O 5.355029 -2.343797 -0.478660  
C O 4.866371 -1.050682 -0.644837  
C O -0.000974 2.152367 0.173744  
C O -0.002627 2.825686 1.396973

C O -0.003465 4.216832 1.426644  
C O -0.002599 4.900382 0.219782  
C O -0.000979 4.259347 -1.008521  
C O -0.000176 2.866254 -1.026411  
F O -0.003410 6.257419 0.243764  
H O -6.393215 -2.558787 -0.696951  
H O -4.906763 -4.379750 0.085315  
H O -2.528343 -3.935006 0.595328  
H O -5.514671 -0.258888 -0.989999  
H O 2.531982 -3.932756 0.595591  
H O 4.910812 -4.375400 0.085786  
H O 6.395726 -2.553152 -0.696426  
H O 5.515157 -0.254039 -0.989628  
H O -0.003234 2.259087 2.319981  
H O -0.004747 4.763226 2.361089  
H O -0.000400 4.836499 -1.924229  
H O 0.000963 2.336535 -1.971145

SCF Done: E(RB3LYP) = -  
2195.05316484  
Sum of electronic and zero-point  
Energies= -2194.777701  
Sum of electronic and thermal Energies=  
-2194.756498  
Sum of electronic and thermal  
Enthalpies= -2194.755554  
Sum of electronic and thermal Free  
Energies= -2194.830132



### 6.2.3.2 Minimum geometry of radical cation of BBTT under IEFPCM variation of PCM

(B3LYP/6-311++G\*\*, IEFPCM CH<sub>2</sub>Cl<sub>2</sub>)

```
#p ub3lyp/6-311++g(d,p) opt
freq=noraman scf=maxcycle=1000
scrf=(iefpc
m,solvent=dichloromethane)
0 1
C 0 -5.479636 -2.182689 -0.000039
C 0 -4.626130 -3.297375 0.000206
C 0 -3.249531 -3.138368 0.000239
C 0 -2.710824 -1.839951 0.000022
C 0 -3.586136 -0.730775 -0.000207
C 0 -4.969182 -0.888313 -0.000253
C 0 -1.335540 -1.422983 0.000100
C 0 -1.192566 -0.042991 -0.000080
S 0 -2.720399 0.807930 -0.000381
S 0 -0.000000 -2.543437 0.000279
C 0 1.335540 -1.422985 0.000071
C 0 1.192566 -0.042990 0.000073
N 0 0.000001 0.640470 0.000030
C 0 2.710821 -1.839952 0.000035
C 0 3.586134 -0.730774 0.000013
S 0 2.720400 0.807919 0.000070
C 0 3.249530 -3.138369 -0.000092
C 0 4.626129 -3.297377 -0.000208
C 0 5.479635 -2.182690 -0.000216
C 0 4.969180 -0.888315 -0.000110
C 0 -0.000003 2.093744 0.000043
C 0 -0.000030 2.772107 1.217930
C 0 -0.000025 4.162872 1.219588
C 0 0.000006 4.824466 0.000086
C 0 0.000027 4.162910 -1.219436
C 0 0.000024 2.772144 -1.217823
F 0 0.000008 6.175378 0.000106
H 0 -6.552920 -2.329161 -0.000057
H 0 -5.049361 -4.294256 0.000383
H 0 -2.600142 -4.005910 0.000415
H 0 -5.631374 -0.031567 -0.000439
H 0 2.600140 -4.005909 -0.000091
H 0 5.049361 -4.294256 -0.000311
H 0 6.552919 -2.329162 -0.000318
H 0 5.631374 -0.031569 -0.000134
H 0 -0.000054 2.221675 2.150333
H 0 -0.000035 4.724980 2.144187
H 0 0.000039 4.725045 -2.144019
H 0 0.000038 2.221748 -2.150248
SCF Done: E(UB3LYP) = -
2194.87671878
Sum of electronic and zero-point
Energies= -2194.600413
Sum of electronic and thermal Energies=
-2194.579337
Sum of electronic and thermal
Enthalpies= -2194.578393
Sum of electronic and thermal Free
Energies= -2194.652961
```

### 6.2.4 *anti-anti-N*-phenyl-BBTT 5

#### 6.2.4.1 Minimum geometry of native BBTT in gas phase (B3LYP/6-311++G\*\*)

```
#p opt freq=noraman rb3lyp/6-311++g(d,p)
pop=full
0 1
C 0 5.331272 -2.115762 -0.512030
C 0 4.489261 -3.136094 -0.045875
C 0 3.159576 -2.880389 0.258930
C 0 2.648540 -1.583251 0.092008
C 0 3.510341 -0.569579 -0.388817
C 0 4.847689 -0.822647 -0.685225
C 0 1.331876 -1.076050 0.369852
C 0 1.192453 0.248428 0.086137
S 0 2.674226 0.973250 -0.552038
```

|     |           |           |           |                                         |           |           |           |
|-----|-----------|-----------|-----------|-----------------------------------------|-----------|-----------|-----------|
| S O | 0.000108  | -2.037529 | 1.074051  | H O                                     | 2.513211  | -3.673650 | 0.616922  |
| C O | -1.331896 | -1.076066 | 0.369640  | H O                                     | 5.496062  | -0.033732 | -1.048687 |
| C O | -1.192466 | 0.248410  | 0.085905  | H O                                     | -2.513288 | -3.673675 | 0.616888  |
| N O | -0.000015 | 0.972312  | 0.163993  | H O                                     | -4.883498 | -4.138080 | 0.079300  |
| C O | -2.648501 | -1.583309 | 0.091858  | H O                                     | -6.367533 | -2.333902 | -0.742557 |
| C O | -3.510313 | -0.569644 | -0.388966 | H O                                     | -5.495991 | -0.033749 | -1.048931 |
| S O | -2.674147 | 0.973181  | -0.552158 | H O                                     | -0.000101 | 2.456767  | 2.362071  |
| C O | -3.159651 | -2.880433 | 0.258928  | H O                                     | -0.000086 | 4.943525  | 2.474297  |
| C O | -4.489381 | -3.136033 | -0.045695 | H O                                     | -0.000050 | 6.273861  | 0.380859  |
| C O | -5.331387 | -2.115685 | -0.511821 | H O                                     | 0.000044  | 5.126031  | -1.817166 |
| C O | -4.847681 | -0.822625 | -0.685274 | H O                                     | 0.000195  | 2.642390  | -1.918278 |
| C O | -0.000027 | 2.410646  | 0.217664  | SCF Done: E(RB3LYP) = -                 |           |           |           |
| C O | -0.000073 | 3.052383  | 1.456844  | 2095.77731924                           |           |           |           |
| C O | -0.000065 | 4.443502  | 1.512604  | Sum of electronic and zero-point        |           |           |           |
| C O | -0.000037 | 5.190791  | 0.334732  | Energies= -2095.493485                  |           |           |           |
| C O | 0.000007  | 4.547045  | -0.900928 | Sum of electronic and thermal Energies= |           |           |           |
| C O | 0.000041  | 3.154338  | -0.963200 | -2095.473094                            |           |           |           |
| H O | 6.367357  | -2.334072 | -0.742982 | Sum of electronic and thermal           |           |           |           |
| H O | 4.883319  | -4.138176 | 0.079013  | Enthalpies= -2095.472150                |           |           |           |
|     |           |           |           | Sum of electronic and thermal Free      |           |           |           |
|     |           |           |           | Energies= -2095.545164                  |           |           |           |

#### 6.2.4.2 Minimum geometry of native BBTT under IEFPCM variation of PCM

(B3LYP/6-311++G\*\*, IEFPCM CH<sub>2</sub>Cl<sub>2</sub>)

```
#p opt freq=noraman rb3lyp/6-311++g(d,p)
scrf=(iefpcm,solvent=dichloro
methane) pop=full
0 1
```

|     |           |           |           |     |           |           |           |
|-----|-----------|-----------|-----------|-----|-----------|-----------|-----------|
| C O | 5.353537  | -2.087300 | -0.499120 | N O | -0.000001 | 0.960175  | 0.192939  |
| C O | 4.510433  | -3.125595 | -0.074111 | C O | -2.657578 | -1.586763 | 0.080700  |
| C O | 3.174027  | -2.886196 | 0.218843  | C O | -3.521970 | -0.554619 | -0.356208 |
| C O | 2.657584  | -1.586756 | 0.080703  | S O | -2.679731 | 0.989124  | -0.484741 |
| C O | 3.521974  | -0.554610 | -0.356206 | C O | -3.174019 | -2.886204 | 0.218842  |
| C O | 4.865202  | -0.791152 | -0.641589 | C O | -4.510424 | -3.125606 | -0.074111 |
| C O | 1.333468  | -1.094164 | 0.349960  | C O | -5.353531 | -2.087312 | -0.499120 |
| C O | 1.191240  | 0.238527  | 0.103829  | C O | -4.865198 | -0.791164 | -0.641589 |
| S O | 2.679732  | 0.989133  | -0.484731 | C O | -0.000004 | 2.401847  | 0.214559  |
| S O | 0.000003  | -2.086210 | 1.011118  | C O | -0.000018 | 3.067872  | 1.440963  |
| C O | -1.333464 | -1.094168 | 0.349957  | C O | -0.000023 | 4.460589  | 1.466656  |
| C O | -1.191239 | 0.238523  | 0.103827  | C O | -0.000012 | 5.182476  | 0.272312  |
|     |           |           |           | C O | 0.000002  | 4.512520  | -0.950235 |
|     |           |           |           | C O | 0.000005  | 3.118338  | -0.983472 |
|     |           |           |           | H O | 6.394049  | -2.293144 | -0.721121 |

H O 4.908517 -4.128574 0.028629  
H O 2.530163 -3.694163 0.547478  
H O 5.514161 0.011368 -0.972212  
H O -2.530153 -3.694170 0.547477  
H O -4.908506 -4.128585 0.028629  
H O -6.394043 -2.293159 -0.721121  
H O -5.514159 0.011355 -0.972213  
H O -0.000026 2.493629 2.359810  
H O -0.000034 4.980693 2.417411  
H O -0.000016 6.266134 0.295244

H O 0.000009 5.071590 -1.878531  
H O 0.000015 2.588557 -1.928717

SCF Done: E(RB3LYP) = -  
2095.78481036

Sum of electronic and zero-point  
Energies= -2095.501019

Sum of electronic and thermal Energies=  
-2095.480659

Sum of electronic and thermal  
Enthalpies= -2095.479714

Sum of electronic and thermal Free  
Energies= -2095.552165

### 6.2.4.3 Minimum geometry of native BBTT under SMD variation of PCM (B3LYP/6-311++G\*\*,

#### SMD CH<sub>2</sub>Cl<sub>2</sub>)

#p opt=tight freq=noraman rb3lyp/6-  
311++g(d,p) pop=full scrf=(SMD,solv  
ent=dichloromethane) geom=check

0 1

C O 5.350531 -2.095585 -0.499558  
C O 4.508311 -3.127876 -0.058189  
C O 3.172885 -2.884673 0.236752  
C O 2.656193 -1.586791 0.083040  
C O 3.520373 -0.561328 -0.369846  
C O 4.862657 -0.800902 -0.657104  
C O 1.333942 -1.088087 0.352652  
C O 1.190456 0.241675 0.091792  
S O 2.678513 0.982441 -0.514148  
S O 0.000001 -2.067814 1.032672  
C O -1.333942 -1.088087 0.352656  
C O -1.190456 0.241675 0.091796  
N O -0.000000 0.963788 0.175459  
C O -2.656192 -1.586792 0.083042  
C O -3.520373 -0.561330 -0.369843  
S O -2.678515 0.982441 -0.514138  
C O -3.172883 -2.884675 0.236751  
C O -4.508307 -3.127880 -0.058193  
C O -5.350528 -2.095590 -0.499562  
C O -4.862656 -0.800906 -0.657105  
C O -0.000000 2.406577 0.214441

C O 0.000003 3.056963 1.449556

C O 0.000003 4.449361 1.491105

C O -0.000002 5.185184 0.304915

C O -0.000006 4.529859 -0.925657

C O -0.000005 3.135881 -0.975895

H O 6.390279 -2.305201 -0.723138

H O 4.906352 -4.129944 0.055829

H O 2.532118 -3.690007 0.578510

H O 5.511117 -0.002776 -1.000533

H O -2.532115 -3.690009 0.578509

H O -4.906347 -4.129949 0.055823

H O -6.390276 -2.305207 -0.723144

H O -5.511117 -0.002780 -1.000533

H O 0.000007 2.471391 2.361728

H O 0.000006 4.958452 2.448258

H O -0.000002 6.268965 0.340652

H O -0.000010 5.099854 -1.847752

H O -0.000009 2.617582 -1.927899

SCF Done: E(RB3LYP) = -  
2095.80850503

Sum of electronic and zero-point  
Energies= -2095.524556

Sum of electronic and thermal Energies=  
-2095.504320

Sum of electronic and thermal  
Enthalpies= -2095.503376

Sum of electronic and thermal Free  
Energies= -2095.574657

#### 6.2.4.4 Minimum geometry of radical cation of BBTT in gas phase (B3LYP/6-311++G\*\*)

```
#p ub3lyp/6-311++g(d,p) opt
freq=noraman scf=maxcycle=1000
0 1
C O 5.479297 -1.937864 -0.000175
C O 4.625872 -3.052354 -0.000147
C O 3.250235 -2.892802 -0.000041
C O 2.711637 -1.594062 0.000048
C O 3.587481 -0.485231 -0.000015
C O 4.969757 -0.643467 -0.000116
C O 1.337780 -1.175369 0.000031
C O 1.193803 0.205589 -0.000073
S O 2.722967 1.055011 -0.000106
S O -0.000004 -2.296303 0.000484
C O -1.337786 -1.175370 0.000168
C O -1.193806 0.205598 -0.000054
N O -0.000006 0.888908 -0.000050
C O -2.711637 -1.594058 0.000021
C O -3.587480 -0.485221 -0.000315
S O -2.722961 1.055002 -0.000495
C O -3.250245 -2.892795 0.000268
C O -4.625882 -3.052340 0.000173
C O -5.479303 -1.937847 -0.000175
C O -4.969756 -0.643452 -0.000429
C O 0.000002 2.345893 0.000070
C O -0.000362 3.022605 1.218250
```

C O -0.000358 4.415301 1.210310  
C O 0.000009 5.108300 0.000306  
C O 0.000373 4.415514 -1.209814  
C O 0.000370 3.022814 -1.217992  
H O 6.552447 -2.085298 -0.000255  
H O 5.049698 -4.048918 -0.000232  
H O 2.600664 -3.760725 0.000012  
H O 5.633407 0.212500 -0.000120  
H O -2.600679 -3.760721 0.000481  
H O -5.049713 -4.048902 0.000380  
H O -6.552454 -2.085274 -0.000249  
H O -5.633403 0.212517 -0.000734  
H O -0.000622 2.471157 2.151028  
H O -0.000646 4.955993 2.148864  
H O 0.000011 6.191765 0.000402  
H O 0.000664 4.956363 -2.148277  
H O 0.000632 2.471526 -2.150864

SCF Done: E(UB3LYP) = -  
2095.55859696

Sum of electronic and zero-point  
Energies= -2095.274032

Sum of electronic and thermal Energies=  
-2095.253820

Sum of electronic and thermal  
Enthalpies= -2095.252875

Sum of electronic and thermal Free  
Energies= -2095.324885

#### 6.2.4.5 Minimum geometry of radical cation of BBTT under SMD variation of PCM (B3LYP/6-311++G\*\*, SMD CH<sub>2</sub>Cl<sub>2</sub>)

```
#p ub3lyp/6-311++g(d,p) opt
freq=noraman scf=maxcycle=1000
scrf=(SMD,s
olvent=dichloromethane)
0 1
C O 5.477113 -1.940378 0.000033
C O 4.621543 -3.053578 -0.000015
```

C O 3.245131 -2.892494 -0.000015  
C O 2.710198 -1.592390 0.000020  
C O 3.587624 -0.484951 0.000072  
C O 4.970272 -0.644205 0.000082  
C O 1.336501 -1.172741 -0.000009  
C O 1.190898 0.206560 -0.000008

|     |           |           |           |                                         |           |           |           |
|-----|-----------|-----------|-----------|-----------------------------------------|-----------|-----------|-----------|
| S O | 2.722157  | 1.055794  | 0.000092  | H O                                     | 2.594449  | -3.759842 | -0.000024 |
| S O | -0.000015 | -2.293900 | 0.000009  | H O                                     | 5.636029  | 0.210625  | 0.000148  |
| C O | -1.336518 | -1.172731 | 0.000043  | H O                                     | -2.594489 | -3.759818 | 0.000088  |
| C O | -1.190896 | 0.206574  | 0.000038  | H O                                     | -5.043384 | -4.051382 | 0.000111  |
| N O | 0.000000  | 0.889533  | 0.000044  | H O                                     | -6.550374 | -2.089581 | -0.000082 |
| C O | -2.710216 | -1.592365 | -0.000034 | H O                                     | -5.636033 | 0.210675  | -0.000242 |
| C O | -3.587635 | -0.484920 | -0.000122 | H O                                     | -0.000850 | 2.465737  | 2.150480  |
| S O | -2.722153 | 1.055812  | -0.000113 | H O                                     | -0.000858 | 4.954140  | 2.149780  |
| C O | -3.245163 | -2.892464 | 0.000043  | H O                                     | 0.000050  | 6.190508  | -0.000022 |
| C O | -4.621577 | -3.053536 | 0.000031  | H O                                     | 0.000933  | 4.954093  | -2.149794 |
| C O | -5.477139 | -1.940330 | -0.000065 | H O                                     | 0.000884  | 2.465693  | -2.150445 |
| C O | -4.970283 | -0.644161 | -0.000143 | SCF Done: E(UB3LYP) = -                 |           |           |           |
| C O | 0.000016  | 2.346591  | 0.000021  | 2095.63701017                           |           |           |           |
| C O | -0.000493 | 3.020617  | 1.219690  | Sum of electronic and zero-point        |           |           |           |
| C O | -0.000480 | 4.413623  | 1.210735  | Energies= -2095.352156                  |           |           |           |
| C O | 0.000039  | 5.106458  | -0.000009 | Sum of electronic and thermal Energies= |           |           |           |
| C O | 0.000546  | 4.413596  | -1.210738 | -2095.332113                            |           |           |           |
| C O | 0.000538  | 3.020590  | -1.219665 | Sum of electronic and thermal           |           |           |           |
| H O | 6.550347  | -2.089638 | 0.000036  | Enthalpies= -2095.331169                |           |           |           |
| H O | 5.043343  | -4.051427 | -0.000059 | Sum of electronic and thermal Free      |           |           |           |
|     |           |           |           | Energies= -2095.402396                  |           |           |           |

## 6.2.5 *anti-anti-N-para*-methylphenyl-BBTT

### 6.2.5.1 Minimum geometry of native BBTT under IEFPCM variation of PCM

(B3LYP/6-311++G\*\*, IEFPCM CH<sub>2</sub>Cl<sub>2</sub>)

|                                                                       |           |           |           |          |          |           |           |
|-----------------------------------------------------------------------|-----------|-----------|-----------|----------|----------|-----------|-----------|
| #p opt=tight freq=norman rb3lyp/6-311++g(d,p) scrf=(iefpcm,solvent=di | C O       | 1.326126  | -1.369310 | 0.349210 |          |           |           |
| chloromethane) pop=full                                               | C O       | 1.190024  | -0.036463 | 0.099474 |          |           |           |
| 0 1                                                                   | N O       | 0.003083  | 0.692224  | 0.184573 |          |           |           |
| C O                                                                   | -5.369779 | -2.326538 | -0.483112 | C O      | 2.649218 | -1.867617 | 0.086333  |
| C O                                                                   | -4.531567 | -3.368851 | -0.058331 | C O      | 3.519296 | -0.839976 | -0.350171 |
| C O                                                                   | -3.192747 | -3.136885 | 0.229763  | S O      | 2.683578 | 0.706915  | -0.484760 |
| C O                                                                   | -2.668752 | -1.840916 | 0.086842  | C O      | 3.160049 | -3.168758 | 0.229581  |
| C O                                                                   | -3.528474 | -0.804509 | -0.349448 | C O      | 4.496507 | -3.414281 | -0.058226 |
| C O                                                                   | -4.873912 | -1.033694 | -0.630139 | C O      | 5.345231 | -2.380523 | -0.483059 |
| C O                                                                   | -1.340662 | -1.355932 | 0.349575  | C O      | 4.862441 | -1.082776 | -0.630505 |
| C O                                                                   | -1.191178 | -0.024516 | 0.099796  | C O      | 0.010586 | 2.133779  | 0.179965  |
| S O                                                                   | -2.677380 | 0.733940  | -0.483836 | C O      | 0.013224 | 2.827462  | 1.391015  |
| S O                                                                   | -0.012155 | -2.354645 | 1.010919  | C O      | 0.017795 | 4.218205  | 1.389610  |
|                                                                       |           |           |           | C O      | 0.021180 | 4.941967  | 0.188983  |

|     |           |           |           |                                         |           |          |           |
|-----|-----------|-----------|-----------|-----------------------------------------|-----------|----------|-----------|
| C 0 | 0.015290  | 4.228401  | -1.013917 | H 0                                     | 0.011818  | 4.766141 | -1.955850 |
| C 0 | 0.011033  | 2.834356  | -1.025644 | H 0                                     | 0.005288  | 2.293993 | -1.965073 |
| C 0 | 0.050771  | 6.450208  | 0.199812  | H 0                                     | -0.613583 | 6.854209 | 0.967473  |
| H 0 | -6.412243 | -2.526575 | -0.701251 | H 0                                     | 1.059553  | 6.816275 | 0.417878  |
| H 0 | -4.935333 | -4.369186 | 0.048089  | H 0                                     | -0.249166 | 6.861095 | -0.765779 |
| H 0 | -2.552838 | -3.948087 | 0.558188  | SCF Done: E(RB3LYP) = -                 |           |          |           |
| H 0 | -5.519061 | -0.227984 | -0.960515 | 2135.11307644                           |           |          |           |
| H 0 | 2.511830  | -3.973306 | 0.558077  | Sum of electronic and zero-point        |           |          |           |
| H 0 | 4.890196  | -4.418591 | 0.048500  | Energies= -2134.802203                  |           |          |           |
| H 0 | 6.385691  | -2.591065 | -0.700892 | Sum of electronic and thermal Energies= |           |          |           |
| H 0 | 5.515761  | -0.283685 | -0.960915 | -2134.779957                            |           |          |           |
| H 0 | 0.008926  | 2.274811  | 2.323230  | Sum of electronic and thermal           |           |          |           |
| H 0 | 0.016688  | 4.750020  | 2.335236  | Enthalpies= -2134.779013                |           |          |           |
|     |           |           |           | Sum of electronic and thermal Free      |           |          |           |
|     |           |           |           | Energies= -2134.856097                  |           |          |           |

### 6.2.5.2 Minimum geometry of radical cation of BBTT under IEFPCM variation of PCM

(B3LYP/6-311++G\*\*, IEFPCM CH<sub>2</sub>Cl<sub>2</sub>)

```
#p ub3lyp/6-311++g(d,p) opt
freq=noraman scf=maxcycle=1000
scrf=(iefpc
m,solvent=dichloromethane)
0 1
```

|     |           |           |           |     |           |           |           |
|-----|-----------|-----------|-----------|-----|-----------|-----------|-----------|
| C 0 | 5.483631  | -2.189461 | -0.000493 | C 0 | -4.621758 | -3.321179 | -0.000363 |
| C 0 | 4.632599  | -3.306094 | -0.000501 | C 0 | -5.476493 | -2.207389 | -0.000304 |
| C 0 | 3.255624  | -3.150080 | -0.000276 | C 0 | -4.967274 | -0.912551 | -0.000082 |
| C 0 | 2.713878  | -1.852880 | -0.000027 | C 0 | -0.003401 | 2.077662  | 0.000259  |
| C 0 | 3.586595  | -0.741500 | -0.000031 | C 0 | -0.002226 | 2.759033  | -1.214508 |
| C 0 | 4.970065  | -0.896347 | -0.000266 | C 0 | 0.000151  | 4.150106  | -1.203810 |
| C 0 | 1.337764  | -1.438915 | 0.000192  | C 0 | -0.000462 | 4.866949  | -0.000165 |
| C 0 | 1.191437  | -0.059107 | 0.000313  | C 0 | 0.001457  | 4.150519  | 1.203636  |
| S 0 | 2.717715  | 0.795328  | 0.000210  | C 0 | -0.000924 | 2.759374  | 1.214752  |
| S 0 | 0.004040  | -2.562047 | 0.000371  | C 0 | -0.027134 | 6.373826  | -0.000650 |
| C 0 | -1.333204 | -1.443132 | 0.000199  | H 0 | 6.557262  | -2.333521 | -0.000677 |
| C 0 | -1.191348 | -0.062873 | 0.000314  | H 0 | 5.058043  | -4.302059 | -0.000697 |
| N 0 | -0.001057 | 0.622400  | 0.000437  | H 0 | 2.608145  | -4.019082 | -0.000308 |
| C 0 | -2.707963 | -1.861517 | 0.000046  | H 0 | 5.630269  | -0.038028 | -0.000284 |
| C 0 | -3.584322 | -0.753012 | 0.000098  | H 0 | -2.594848 | -4.027271 | -0.000268 |
| S 0 | -2.720361 | 0.786677  | 0.000308  | H 0 | -5.043873 | -4.318559 | -0.000554 |
| C 0 | -3.245324 | -3.160518 | -0.000195 | H 0 | -6.549639 | -2.355025 | -0.000445 |
|     |           |           |           | H 0 | -5.630452 | -0.056522 | -0.000057 |
|     |           |           |           | H 0 | 0.000128  | 2.210112  | -2.148430 |
|     |           |           |           | H 0 | 0.004975  | 4.684821  | -2.146849 |
|     |           |           |           | H 0 | 0.007330  | 4.685491  | 2.146516  |

H O 0.002395 2.210748 2.148845  
H O -1.060042 6.737505 -0.008299  
H O 0.457272 6.780148 0.889052  
H O 0.469919 6.779635 -0.883648  
SCF Done: E(UB3LYP) = -  
2134.93852249

Sum of electronic and zero-point  
Energies= -2134.626868  
Sum of electronic and thermal Energies=  
-2134.604712  
Sum of electronic and thermal  
Enthalpies= -2134.603767  
Sum of electronic and thermal Free  
Energies= -2134.681372

## 6.2.6 anti-anti-N-para-methoxyphenyl-BBTT

### 6.2.6.1 Minimum geometry of native BBTT under IEFPCM variation of PCM

(B3LYP/6-311++G\*\*, IEFPCM CH<sub>2</sub>Cl<sub>2</sub>)

#p opt freq=noraman rb3lyp/6-311++g(d,p)  
scrf=(iefpcm,solvent=dichloromethane)  
pop=full

O 1  
C O 2.579773 -5.363757 -0.531287  
C O 3.639817 -4.519091 -0.167710  
C O 3.418161 -3.179599 0.125660  
C O 2.114182 -2.661324 0.049884  
C O 1.059570 -3.527656 -0.325580  
C O 1.278801 -4.873638 -0.611138  
C O 1.638681 -1.333032 0.328636  
C O 0.295392 -1.190328 0.147578  
S O -0.487326 -2.683122 -0.382571  
S O 2.667042 0.000859 0.931333  
C O 1.637740 1.334083 0.328781  
C O 0.294567 1.190352 0.147712  
N O -0.424289 -0.000196 0.264166  
C O 2.112317 2.662643 0.049726  
C O 1.057159 3.528130 -0.326114  
S O -0.489137 2.682611 -0.383103  
C O 3.415871 3.181933 0.125957  
C O 3.636604 4.521551 -0.167424  
C O 2.576025 5.365386 -0.531424  
C O 1.275466 4.874259 -0.611672  
C O -1.864260 -0.000617 0.290932  
C O -2.535519 0.000054 1.518565  
C O -3.920172 -0.000250 1.553668  
C O -4.656289 -0.001257 0.358673

C O -3.988176 -0.001956 -0.870207  
C O -2.593366 -0.001602 -0.895609  
O O -6.007975 -0.001520 0.496977  
C O -6.820256 -0.002373 -0.680535  
H O 2.772168 -6.406653 -0.754154  
H O 4.646094 -4.918393 -0.112941  
H O 4.243338 -2.534874 0.406405  
H O 0.459087 -5.523683 -0.894102  
H O 4.241429 2.537904 0.407182  
H O 4.642573 4.921610 -0.112505  
H O 2.767718 6.408393 -0.754378  
H O 0.455361 5.523642 -0.895026  
H O -1.965033 0.000826 2.439768  
H O -4.453315 0.000272 2.496611  
H O -4.532932 -0.002739 -1.803960  
H O -2.075263 -0.002052 -1.847379  
H O -7.849467 -0.002341 -0.328282  
H O -6.640002 0.892185 -1.283136  
H O -6.639695 -0.897590 -1.282067

SCF Done: E(RB3LYP) = -  
2210.34389757  
Sum of electronic and zero-point  
Energies= -2210.027841  
Sum of electronic and thermal Energies=  
-2210.004878  
Sum of electronic and thermal  
Enthalpies= -2210.003934  
Sum of electronic and thermal Free  
Energies= -2210.082049

## 6.2.6.2 Minimum geometry of radical cation of BBTT under IEFPCM variation of PCM

(B3LYP/6-311++G\*\*, IEFPCM CH<sub>2</sub>Cl<sub>2</sub>)

```
#p ub3lyp/6-311++g(d,p) opt
freq=noraman scf=maxcycle=1000
scrf=(iefpc
m,solvent=dichloromethane)
0 1
C 0 -2.450535 -5.480023 -0.055899
C 0 -3.565914 -4.627670 -0.078570
C 0 -3.408446 -3.250907 -0.065554
C 0 -2.111136 -2.710757 -0.028590
C 0 -1.000893 -3.584752 -0.005888
C 0 -1.157297 -4.967973 -0.019711
C 0 -1.695868 -1.335149 -0.009502
C 0 -0.316321 -1.190806 0.025699
S 0 0.536636 -2.717509 0.038122
S 0 -2.816751 0.000435 -0.023118
C 0 -1.695454 1.335675 -0.009406
C 0 -0.315955 1.190846 0.025530
N 0 0.367759 -0.000082 0.048723
C 0 -2.110257 2.711447 -0.028495
C 0 -0.999667 3.585018 -0.006012
S 0 0.537521 2.717306 0.037740
C 0 -3.407379 3.252092 -0.065172
C 0 -3.564317 4.628918 -0.078138
C 0 -2.448599 5.480839 -0.055722
C 0 -1.155558 4.968298 -0.019792
C 0 1.819947 -0.000288 0.109453
C 0 2.453315 -0.000565 1.355567
C 0 3.835756 -0.000796 1.412082
C 0 4.593479 -0.000748 0.229098
C 0 3.948266 -0.000414 -1.014632
C 0 2.557096 -0.000189 -1.069736
O 0 5.935382 -0.001025 0.391904
C 0 6.777004 -0.001063 -0.768366
H 0 -2.595669 -6.553458 -0.066797
H 0 -4.562011 -5.051884 -0.106843
H 0 -4.276359 -2.602212 -0.084173
H 0 -0.299947 -5.629245 -0.002744
H 0 -4.275560 2.603740 -0.083646
H 0 -4.560253 5.053522 -0.106177
H 0 -2.593302 6.554334 -0.066608
H 0 -0.297943 5.629223 -0.002984
H 0 1.866813 -0.000602 2.266332
H 0 4.351274 -0.001031 2.364183
H 0 4.510590 -0.000353 -1.937527
H 0 2.053399 0.000074 -2.028725
H 0 7.796279 -0.001425 -0.389682
H 0 6.609353 -0.896460 -1.372293
H 0 6.609857 0.894635 -1.371983
SCF Done: E(UB3LYP) = -
2210.16956529
Sum of electronic and zero-point
Energies= -2209.852604
Sum of electronic and thermal Energies=
-2209.829798
Sum of electronic and thermal
Enthalpies= -2209.828854
Sum of electronic and thermal Free
Energies= -2209.906713
```

## 6.3 anti-anti-N-ortho(,ortho')-(di)substituted-phenyl-3,9-dibromo-BBTT 4a-d

### 6.3.1 anti-anti-N-ortho-methylphenyl-3,9-dibromo-BBTT 4a

#### 6.3.1.1 Minimum geometry of native BBTT in gas phase (B3LYP/6-311++G\*\*)

```
Conformer I: #p opt freq=noraman rb3lyp/6-311++g(d,p)
pop=full
```



|     |           |           |           |                                         |           |           |           |
|-----|-----------|-----------|-----------|-----------------------------------------|-----------|-----------|-----------|
| 0 1 | C 0       | -0.005108 | 3.149587  | 2.493298                                |           |           |           |
| C 0 | -5.336002 | -1.575240 | -0.148774 | Br 0                                    | -7.178030 | -1.992209 | -0.484100 |
| C 0 | -4.508706 | -2.551979 | 0.418526  | Br 0                                    | 7.178702  | -1.991429 | -0.483520 |
| C 0 | -3.174113 | -2.266883 | 0.670031  | H 0                                     | -4.913011 | -3.526212 | 0.659878  |
| C 0 | -2.654702 | -1.003055 | 0.349755  | H 0                                     | -2.533087 | -3.023657 | 1.107284  |
| C 0 | -3.517994 | -0.044743 | -0.230835 | H 0                                     | -5.514548 | 0.428930  | -0.921926 |
| C 0 | -4.861860 | -0.312785 | -0.480451 | H 0                                     | 2.533767  | -3.023210 | 1.107771  |
| C 0 | -1.331845 | -0.478208 | 0.547487  | H 0                                     | 4.913799  | -3.525525 | 0.660634  |
| C 0 | -1.190768 | 0.804770  | 0.111803  | H 0                                     | 5.515003  | 0.429541  | -0.921457 |
| S 0 | -2.678990 | 1.463309  | -0.581587 | H 0                                     | 0.003797  | 2.883387  | -2.180941 |
| S 0 | 0.000248  | -1.364917 | 1.343560  | H 0                                     | 0.003687  | 5.358024  | -2.451968 |
| C 0 | 1.332270  | -0.477993 | 0.547572  | H 0                                     | -0.000694 | 6.805070  | -0.429932 |
| C 0 | 1.191051  | 0.804955  | 0.111829  | H 0                                     | -0.004726 | 5.792205  | 1.818559  |
| N 0 | 0.000079  | 1.531752  | 0.090939  | H 0                                     | 0.872175  | 2.515178  | 2.647330  |
| C 0 | 2.655190  | -1.002705 | 0.349967  | H 0                                     | -0.884735 | 2.517914  | 2.645385  |
| C 0 | 3.518411  | -0.044327 | -0.230607 | H 0                                     | -0.004825 | 3.923350  | 3.262325  |
| S 0 | 2.679328  | 1.463603  | -0.581460 | SCF Done: E(RB3LYP) = -                 |           |           |           |
| C 0 | 3.174736  | -2.266411 | 0.670472  | 7282.18968236                           |           |           |           |
| C 0 | 4.509381  | -2.551388 | 0.419092  | Sum of electronic and zero-point        |           |           |           |
| C 0 | 5.336576  | -1.574607 | -0.148249 | Energies= -7281.898930                  |           |           |           |
| C 0 | 4.862335  | -0.312233 | -0.480070 | Sum of electronic and thermal Energies= |           |           |           |
| C 0 | -0.000158 | 2.967747  | -0.038361 | -7281.873677                            |           |           |           |
| C 0 | 0.002076  | 3.533484  | -1.313614 | Sum of electronic and thermal           |           |           |           |
| C 0 | 0.001940  | 4.918195  | -1.461758 | Enthalpies= -7281.872733                |           |           |           |
| C 0 | -0.000544 | 5.725696  | -0.327887 | Sum of electronic and thermal Free      |           |           |           |
| C 0 | -0.002841 | 5.152369  | 0.942555  | Energies= -7281.958391                  |           |           |           |
| C 0 | -0.002663 | 3.765449  | 1.118045  | Conformer II:                           |           |           |           |
|     |           |           |           | No minimum on the potential hyper       |           |           |           |
|     |           |           |           | surface could be found.                 |           |           |           |

### 6.3.1.2 Minimum geometry of native BBT under IEFPCM variation of PCM

(B3LYP/6-311++G\*\*, IEFPCM CH<sub>2</sub>Cl<sub>2</sub>)

|                                          |           |           |           |           |           |           |           |
|------------------------------------------|-----------|-----------|-----------|-----------|-----------|-----------|-----------|
| Conformer I:                             | C 0       | -2.660106 | -1.017154 | 0.336893  |           |           |           |
| #p opt freq=noraman rb3lyp/6-311++g(d,p) | C 0       | -3.524511 | -0.039941 | -0.211473 |           |           |           |
| pop=full SCRF=(IEFPCM,Solvent            | C 0       | -4.872291 | -0.294850 | -0.455677 |           |           |           |
| =Dichloromethane)                        | C 0       | -1.332607 | -0.504358 | 0.532212  |           |           |           |
| 0 1                                      | C 0       | -1.189596 | 0.789332  | 0.127142  |           |           |           |
| C 0                                      | -5.346701 | -1.563757 | -0.149222 | S 0       | -2.681063 | 1.472313  | -0.532402 |
| C 0                                      | -4.521469 | -2.559374 | 0.387328  | S 0       | 0.000092  | -1.419564 | 1.296631  |
| C 0                                      | -3.182583 | -2.286358 | 0.633026  | C 0       | 1.332775  | -0.504211 | 0.532323  |



|                                         |           |           |           |      |           |           |           |
|-----------------------------------------|-----------|-----------|-----------|------|-----------|-----------|-----------|
| C 0                                     | -4.915147 | -0.464579 | 0.292325  | C 0  | -4.555517 | -2.761769 | 0.405608  |
| C 0                                     | -0.000001 | 2.648268  | -0.192104 | C 0  | -3.203013 | -2.503831 | 0.577852  |
| C 0                                     | -0.000036 | 3.453442  | -1.335617 | C 0  | -2.678069 | -1.250090 | 0.228420  |
| C 0                                     | -0.000044 | 4.842758  | -1.244939 | C 0  | -3.553279 | -0.273463 | -0.300847 |
| C 0                                     | -0.000013 | 5.429236  | 0.014742  | C 0  | -4.914710 | -0.515015 | -0.472827 |
| C 0                                     | 0.000021  | 4.659757  | 1.175646  | C 0  | -1.334642 | -0.753012 | 0.351002  |
| C 0                                     | 0.000024  | 3.265659  | 1.080601  | C 0  | -1.193360 | 0.526933  | -0.087920 |
| O 0                                     | 0.000043  | 2.422121  | 2.135947  | S 0  | -2.703538 | 1.211966  | -0.701107 |
| Br 0                                    | 7.262146  | -2.096841 | 0.421177  | S 0  | 0.000001  | -1.698359 | 1.063695  |
| Br 0                                    | -7.262135 | -2.096853 | 0.421211  | C 0  | 1.334643  | -0.753012 | 0.351003  |
| Cl 0                                    | -0.000071 | 2.703956  | -2.913018 | C 0  | 1.193359  | 0.526932  | -0.087921 |
| C 0                                     | 0.000075  | 2.962584  | 3.456072  | N 0  | -0.000002 | 1.253716  | -0.176759 |
| H 0                                     | 4.966195  | -3.816716 | -0.331218 | C 0  | 2.678073  | -1.250088 | 0.228421  |
| H 0                                     | 2.556502  | -3.418040 | -0.710050 | C 0  | 3.553281  | -0.273463 | -0.300847 |
| H 0                                     | 5.576895  | 0.344890  | 0.571353  | S 0  | 2.703542  | 1.211967  | -0.701111 |
| H 0                                     | -2.556500 | -3.418036 | -0.710076 | C 0  | 3.203013  | -2.503830 | 0.577854  |
| H 0                                     | -4.966189 | -3.816719 | -0.331235 | C 0  | 4.555519  | -2.761769 | 0.405610  |
| H 0                                     | -5.576891 | 0.344880  | 0.571367  | C 0  | 5.393844  | -1.767530 | -0.113310 |
| H 0                                     | -0.000072 | 5.442285  | -2.144898 | C 0  | 4.914712  | -0.515015 | -0.472827 |
| H 0                                     | -0.000017 | 6.510043  | 0.096919  | C 0  | -0.000000 | 2.665041  | 0.060480  |
| H 0                                     | 0.000040  | 5.145688  | 2.141135  | C 0  | 0.000009  | 3.589271  | -0.986501 |
| H 0                                     | 0.000093  | 2.102504  | 4.122100  | C 0  | 0.000010  | 4.961931  | -0.743734 |
| H 0                                     | 0.896210  | 3.564150  | 3.635899  | C 0  | 0.000001  | 5.407917  | 0.571204  |
| H 0                                     | -0.896053 | 3.564147  | 3.635943  | C 0  | -0.000009 | 4.515207  | 1.641511  |
| SCF Done: E(RB3LYP) = -                 |           |           |           | C 0  | -0.000009 | 3.141600  | 1.391752  |
| 7817.03483333                           |           |           |           | O 0  | -0.000019 | 2.183846  | 2.344382  |
| Sum of electronic and zero-point        |           |           |           | Br 0 | -7.261031 | -2.146464 | -0.338853 |
| Energies= -7816.748867                  |           |           |           | Br 0 | 7.261035  | -2.146462 | -0.338842 |
| Sum of electronic and thermal Energies= |           |           |           | Cl 0 | 0.000015  | 3.025185  | -2.643957 |
| -7816.721398                            |           |           |           | C 0  | -0.000038 | 2.570623  | 3.717061  |
| Sum of electronic and thermal           |           |           |           | H 0  | -4.964882 | -3.727849 | 0.669966  |
| Enthalpies= -7816.720454                |           |           |           | H 0  | -2.553675 | -3.275054 | 0.976002  |
| Sum of electronic and thermal Free      |           |           |           | H 0  | -5.576634 | 0.239943  | -0.876358 |
| Energies= -7816.811375                  |           |           |           | H 0  | 2.553675  | -3.275051 | 0.976005  |
| Conformer II:                           |           |           |           | H 0  | 4.964884  | -3.727849 | 0.669967  |
| #p opt=tight freq=noraman rb3lyp/6-     |           |           |           | H 0  | 5.576636  | 0.239942  | -0.876360 |
| 311++g(d,p) pop=full                    |           |           |           | H 0  | 0.000017  | 5.655703  | -1.573259 |
| 0 1                                     |           |           |           |      |           |           |           |
| C 0                                     | -5.393841 | -1.767531 | -0.113313 |      |           |           |           |

H O 0.000001 6.473354 0.770439  
H O -0.000017 4.892236 2.654715  
H O -0.000050 1.640122 4.280569  
H O 0.896043 3.148294 3.963591  
H O -0.896123 3.148300 3.963565  
SCF Done: E(RB3LYP) = -  
7817.03485758

Sum of electronic and zero-point  
Energies= -7816.748887  
Sum of electronic and thermal Energies=  
-7816.721452  
Sum of electronic and thermal  
Enthalpies= -7816.720508  
Sum of electronic and thermal Free  
Energies= -7816.811263

6.3.2.2 Minimum geometry of native BBT under IEFPCM variation of PCM  
(B3LYP/6-311++G\*\*, IEFPCM CH<sub>2</sub>Cl<sub>2</sub>)

Conformer I:  
#p opt=tight freq=noraman rb3lyp/6-  
311++g(d,p) pop=full SCRF=(IEFPCM,S  
olvent=Dichloromethane)  
0 1

C O 5.412075 -1.740045 0.127091  
C O 4.576558 -2.819582 -0.182995  
C O 3.218511 -2.606830 -0.378303  
C O 2.687270 -1.312119 -0.259229  
C O 3.564160 -0.248573 0.060161  
C O 4.929757 -0.443654 0.253612  
C O 1.336232 -0.857185 -0.435369  
C O 1.193643 0.483260 -0.236224  
S O 2.709348 1.284720 0.178534  
S O -0.000001 -1.926142 -0.953084  
C O -1.336232 -0.857184 -0.435361  
C O -1.193637 0.483262 -0.236223  
N O 0.000001 1.206238 -0.289643  
C O -2.687268 -1.312117 -0.259230  
C O -3.564164 -0.248571 0.060151  
S O -2.709357 1.284728 0.178523  
C O -3.218508 -2.606828 -0.378300  
C O -4.576559 -2.819581 -0.182996  
C O -5.412077 -1.740046 0.127082  
C O -4.929760 -0.443652 0.253599  
C O 0.000002 2.629702 -0.181839  
C O 0.000016 3.441464 -1.321059  
C O 0.000018 4.828628 -1.226494

C O 0.000004 5.407821 0.038710  
C O -0.000010 4.633176 1.195356  
C O -0.000010 3.238600 1.095190  
O O -0.000018 2.391594 2.146128  
Br O 7.289962 -2.060248 0.387824  
Br O -7.289964 -2.060247 0.387816  
Cl O 0.000031 2.693882 -2.905722  
C O -0.000033 2.933089 3.473774  
H O 4.987733 -3.816512 -0.271184  
H O 2.573809 -3.444396 -0.618112  
H O 5.589226 0.379219 0.495902  
H O -2.573805 -3.444396 -0.618100  
H O -4.987731 -3.816513 -0.271187  
H O -5.589232 0.379221 0.495879  
H O 0.000029 5.435573 -2.121401  
H O 0.000005 6.487890 0.126523  
H O -0.000019 5.114982 2.162677  
H O -0.000041 2.071768 4.137379  
H O 0.895900 3.533476 3.649917  
H O -0.895970 3.533476 3.649897

SCF Done: E(RB3LYP) = -  
7817.04500995  
Sum of electronic and zero-point  
Energies= -7816.759173  
Sum of electronic and thermal Energies=  
-7816.731694  
Sum of electronic and thermal  
Enthalpies= -7816.730750  
Sum of electronic and thermal Free  
Energies= -7816.821860

Conformer II:  
 #p opt=tight freq=noraman rb3lyp/6-311++g(d,p) pop=full SCRF=(IEFPCM,S  
 olvent=Dichloromethane)

0 1  
 C 0 -5.451141 -1.719702 -0.061372  
 C 0 -4.610052 -2.796970 0.240901  
 C 0 -3.240510 -2.594151 0.346132  
 C 0 -2.704152 -1.311670 0.145345  
 C 0 -3.587105 -0.250365 -0.163595  
 C 0 -4.963745 -0.435403 -0.267612  
 C 0 -1.339969 -0.868384 0.226787  
 C 0 -1.195051 0.461862 -0.027753  
 S 0 -2.724591 1.266279 -0.386004  
 S 0 -0.000001 -1.959291 0.685392  
 C 0 1.339969 -0.868385 0.226779  
 C 0 1.195047 0.461861 -0.027756  
 N 0 -0.000001 1.180580 -0.088739  
 C 0 2.704151 -1.311670 0.145339  
 C 0 3.587104 -0.250363 -0.163595  
 S 0 2.724593 1.266281 -0.386001  
 C 0 3.240507 -2.594153 0.346117  
 C 0 4.610050 -2.796973 0.240887  
 C 0 5.451138 -1.719702 -0.061374  
 C 0 4.963745 -0.435401 -0.267609  
 C 0 -0.000001 2.606639 -0.008286  
 C 0 0.000002 3.406616 -1.155611  
 C 0 0.000001 4.795637 -1.072958  
 C 0 -0.000002 5.386592 0.186004

C 0 -0.000004 4.622779 1.350755  
 C 0 -0.000004 3.228404 1.262220  
 O 0 -0.000002 2.388636 2.318469  
 Br 0 -7.344201 -2.025940 -0.199562  
 Br 0 7.344204 -2.025940 -0.199556  
 Cl 0 0.000006 2.649813 -2.737945  
 C 0 -0.000008 2.939761 3.642347  
 H 0 -5.025582 -3.784449 0.392280  
 H 0 -2.592199 -3.430763 0.579456  
 H 0 -5.628022 0.385682 -0.502773  
 H 0 2.592195 -3.430766 0.579435  
 H 0 5.025579 -3.784453 0.392255  
 H 0 5.628024 0.385685 -0.502761  
 H 0 0.000003 5.394078 -1.973517  
 H 0 -0.000002 6.467481 0.263306  
 H 0 -0.000004 5.114030 2.313415  
 H 0 -0.000012 2.083210 4.312110  
 H 0 0.896026 3.541335 3.813844  
 H 0 -0.896042 3.541336 3.813835

SCF Done: E(RB3LYP) = -  
 7817.04479756  
 Sum of electronic and zero-point  
 Energies= -7816.758876  
 Sum of electronic and thermal Energies=  
 -7816.731429  
 Sum of electronic and thermal  
 Enthalpies= -7816.730485  
 Sum of electronic and thermal Free  
 Energies= -7816.821150

### 6.3.3 *anti-anti-N-ortho,ortho'*-fluoromethoxyphenyl-3,9-dibromo-BBTT 4c

#### 6.3.3.1 Minimum geometry of native BBTT in gas phase (B3LYP/6-311++G\*\*)

Conformer I:  
 #p opt=tight freq=noraman rb3lyp/6-311++g(d,p) pop=full  
 0 1  
 C 0 5.387631 -1.692191 0.137525  
 C 0 4.550234 -2.767485 -0.181994

C 0 3.200229 -2.547197 -0.416312  
 C 0 2.675204 -1.248433 -0.326890  
 C 0 3.550707 -0.188700 0.005546  
 C 0 4.908997 -0.392179 0.235797  
 C 0 1.333389 -0.785569 -0.548348

C O 1.194092 0.556371 -0.365003  
 S O 2.702924 1.350699 0.090332  
 S O 0.000004 -1.839196 -1.097982  
 C O -1.333385 -0.785569 -0.548358  
 C O -1.194086 0.556370 -0.365015  
 N O 0.000001 1.278907 -0.450020  
 C O -2.675201 -1.248434 -0.326896  
 C O -3.550704 -0.188702 0.005543  
 S O -2.702928 1.350701 0.090326  
 C O -3.200224 -2.547197 -0.416328  
 C O -4.550229 -2.767488 -0.182005  
 C O -5.387624 -1.692198 0.137524  
 C O -4.908993 -0.392185 0.235799  
 C O -0.000004 2.703235 -0.415930  
 C O -0.000031 3.437362 -1.600359  
 C O -0.000043 4.823563 -1.622207  
 C O -0.000027 5.492556 -0.403504  
 C O -0.000000 4.803362 0.808102  
 C O 0.000009 3.405040 0.811421  
 O O 0.000032 2.634212 1.920071  
 Br O 7.251425 -2.021838 0.452299  
 Br O -7.251417 -2.021850 0.452319  
 F O -0.000046 2.766592 -2.764991  
 C O 0.000032 3.261806 3.201072  
 H O 4.958242 -3.767562 -0.246177  
 H O 2.552499 -3.380953 -0.661506  
 H O 5.570066 0.427144 0.486157  
 H O -2.552495 -3.380950 -0.661530  
 H O -4.958236 -3.767565 -0.246199  
 H O -5.570063 0.427135 0.486163  
 H O -0.000064 5.346084 -2.569522  
 H O -0.000034 6.576218 -0.392605  
 H O 0.000012 5.355405 1.737326  
 H O 0.000041 2.448482 3.923437  
 H O 0.896108 3.874102 3.339709  
 H O -0.896051 3.874088 3.339715  
 SCF Done: E(RB3LYP) = -  
 7456.68066093

Sum of electronic and zero-point  
 Energies= -7456.393170  
 Sum of electronic and thermal Energies=  
 -7456.366084  
 Sum of electronic and thermal  
 Enthalpies= -7456.365140  
 Sum of electronic and thermal Free  
 Energies= -7456.454905  
 Conformer II:  
 #p opt=tight freq=noraman rb3lyp/6-  
 311++g(d,p) pop=full  
 0 1  
 C O -5.376912 -1.725399 -0.100345  
 C O -4.543146 -2.684619 0.486992  
 C O -3.196221 -2.407830 0.673859  
 C O -2.671678 -1.170563 0.269517  
 C O -3.542374 -0.229979 -0.328580  
 C O -4.898235 -0.489744 -0.515110  
 C O -1.334408 -0.657562 0.392456  
 C O -1.193602 0.598701 -0.110819  
 S O -2.694751 1.240992 -0.787221  
 S O -0.000002 -1.545615 1.178769  
 C O 1.334409 -0.657565 0.392460  
 C O 1.193608 0.598699 -0.110814  
 N O -0.000003 1.318522 -0.218776  
 C O 2.671682 -1.170563 0.269529  
 C O 3.542377 -0.229975 -0.328565  
 S O 2.694752 1.240997 -0.787199  
 C O 3.196228 -2.407823 0.673882  
 C O 4.543155 -2.684609 0.487020  
 C O 5.376916 -1.725391 -0.100327  
 C O 4.898238 -0.489739 -0.515097  
 C O 0.000000 2.745016 -0.178425  
 C O 0.000021 3.497102 -1.350065  
 C O 0.000026 4.884665 -1.350342  
 C O 0.000008 5.534557 -0.122266  
 C O -0.000016 4.825708 1.079001  
 C O -0.000021 3.428563 1.058599  
 O O -0.000043 2.637034 2.151975

|      |           |           |           |                                         |           |          |          |
|------|-----------|-----------|-----------|-----------------------------------------|-----------|----------|----------|
| Br 0 | -7.236350 | -2.129707 | -0.345067 | H 0                                     | -0.000029 | 5.363294 | 2.016786 |
| Br 0 | 7.236356  | -2.129704 | -0.345065 | H 0                                     | -0.000083 | 2.414101 | 4.151173 |
| F 0  | 0.000036  | 2.846936  | -2.529804 | H 0                                     | 0.895937  | 3.850823 | 3.594099 |
| C 0  | -0.000061 | 3.240928  | 3.444274  | H 0                                     | -0.896051 | 3.850842 | 3.594067 |
| H 0  | -4.951704 | -3.638592 | 0.793316  | SCF Done: E(RB3LYP) = -                 |           |          |          |
| H 0  | -2.550406 | -3.151727 | 1.125998  | 7456.68115992                           |           |          |          |
| H 0  | -5.556369 | 0.238074  | -0.971281 | Sum of electronic and zero-point        |           |          |          |
| H 0  | 2.550417  | -3.151718 | 1.126030  | Energies= -7456.393592                  |           |          |          |
| H 0  | 4.951718  | -3.638575 | 0.793358  | Sum of electronic and thermal Energies= |           |          |          |
| H 0  | 5.556371  | 0.238079  | -0.971270 | -7456.366552                            |           |          |          |
| H 0  | 0.000043  | 5.421086  | -2.289798 | Sum of electronic and thermal           |           |          |          |
| H 0  | 0.000012  | 6.617901  | -0.094578 | Enthalpies= -7456.365607                |           |          |          |
|      |           |           |           | Sum of electronic and thermal Free      |           |          |          |
|      |           |           |           | Energies= -7456.455156                  |           |          |          |

### 6.3.3.2 Minimum geometry of native BBT under IEFPCM variation of PCM

(B3LYP/6-311++G\*\*, IEFPCM CH<sub>2</sub>Cl<sub>2</sub>)

|                                     |           |           |           |           |           |           |           |
|-------------------------------------|-----------|-----------|-----------|-----------|-----------|-----------|-----------|
| Conformer I:                        | C 0       | -4.567366 | -2.764496 | -0.148363 |           |           |           |
| #p opt=tight freq=noraman rb3lyp/6- | C 0       | -5.401678 | -1.675562 | 0.130683  |           |           |           |
| 311++g(d,p) pop=full                | C 0       | -4.921121 | -0.374278 | 0.200852  |           |           |           |
| SCRF=(IEFPCM,Solvent=Dichloromethan | C 0       | -0.000002 | 2.687566  | -0.406398 |           |           |           |
| e)                                  | C 0       | -0.000019 | 3.434420  | -1.583025 |           |           |           |
| 0 1                                 | C 0       | -0.000027 | 4.818638  | -1.594056 |           |           |           |
| C 0                                 | 5.401686  | -1.675556 | 0.130685  | C 0       | -0.000018 | 5.474533  | -0.366118 |
| C 0                                 | 4.567372  | -2.764491 | -0.148355 | C 0       | -0.000002 | 4.773790  | 0.838248  |
| C 0                                 | 3.212520  | -2.556626 | -0.369300 | C 0       | 0.000005  | 3.374891  | 0.829612  |
| C 0                                 | 2.683032  | -1.257313 | -0.306635 | O 0       | 0.000021  | 2.594765  | 1.930379  |
| C 0                                 | 3.558481  | -0.184089 | -0.017036 | Br 0      | 7.275073  | -1.989713 | 0.428270  |
| C 0                                 | 4.921126  | -0.374273 | 0.200850  | Br 0      | -7.275068 | -1.989723 | 0.428277  |
| C 0                                 | 1.335373  | -0.806232 | -0.516719 | F 0       | -0.000025 | 2.768236  | -2.757557 |
| C 0                                 | 1.193609  | 0.540851  | -0.368917 | C 0       | -0.000002 | 3.217014  | 3.222059  |
| S 0                                 | 2.706077  | 1.354456  | 0.033927  | H 0       | 4.977051  | -3.764932 | -0.192741 |
| S 0                                 | 0.000003  | -1.886136 | -1.013236 | H 0       | 2.568637  | -3.401358 | -0.584899 |
| C 0                                 | -1.335367 | -0.806233 | -0.516718 | H 0       | 5.579362  | 0.456055  | 0.419885  |
| C 0                                 | -1.193602 | 0.540849  | -0.368920 | H 0       | -2.568629 | -3.401358 | -0.584910 |
| N 0                                 | 0.000002  | 1.261515  | -0.458874 | H 0       | -4.977045 | -3.764936 | -0.192760 |
| C 0                                 | -2.683027 | -1.257315 | -0.306631 | H 0       | -5.579360 | 0.456047  | 0.419889  |
| C 0                                 | -3.558477 | -0.184092 | -0.017032 | H 0       | -0.000039 | 5.353537  | -2.534405 |
| S 0                                 | -2.706079 | 1.354457  | 0.033928  | H 0       | -0.000023 | 6.557745  | -0.344107 |
| C 0                                 | -3.212513 | -2.556627 | -0.369307 |           |           |           |           |

H O 0.000005 5.317257 1.772251  
 H O -0.000013 2.398443 3.937740  
 H O 0.895901 3.827139 3.360674  
 H O -0.895913 3.827135 3.360644  
 SCF Done: E(RB3LYP) = -  
 7456.69106787  
 Sum of electronic and zero-point  
 Energies= -7456.403814  
 Sum of electronic and thermal Energies=  
 -7456.376699  
 Sum of electronic and thermal  
 Enthalpies= -7456.375755  
 Sum of electronic and thermal Free  
 Energies= -7456.465503  
 Conformer II:  
 #p opt=tight freq=noraman rb3lyp/6-  
 311++g(d,p) pop=full SCRF=(IEFPCM,S  
 olvent=Dichloromethane)  
 O 1  
 C O -5.391383 -1.717536 -0.094934  
 C O -4.558375 -2.713601 0.428416  
 C O -3.206256 -2.455949 0.609793  
 C O -2.678922 -1.201693 0.262904  
 C O -3.552080 -0.223886 -0.269568  
 C O -4.912563 -0.463251 -0.450532  
 C O -1.335710 -0.706548 0.389153  
 C O -1.193679 0.575143 -0.048634  
 S O -2.701556 1.267975 -0.653688  
 S O 0.000001 -1.646982 1.114902  
 C O 1.335711 -0.706548 0.389152  
 C O 1.193680 0.575143 -0.048633  
 N O -0.000002 1.294011 -0.132242  
 C O 2.678922 -1.201694 0.262901  
 C O 3.552080 -0.223887 -0.269572  
 S O 2.701558 1.267975 -0.653693  
 C O 3.206255 -2.455952 0.609786

C O 4.558373 -2.713604 0.428410  
 C O 5.391384 -1.717537 -0.094936  
 C O 4.912563 -0.463252 -0.450533  
 C O -0.000001 2.720100 -0.187925  
 C O 0.000008 3.389867 -1.409572  
 C O 0.000010 4.771488 -1.509077  
 C O 0.000003 5.503977 -0.326095  
 C O -0.000007 4.881108 0.921377  
 C O -0.000009 3.485112 1.000604  
 O O -0.000018 2.774093 2.147023  
 Br O -7.260982 -2.097058 -0.333530  
 Br O 7.260983 -2.097057 -0.333522  
 F O 0.000015 2.650705 -2.542101  
 C O -0.000010 3.476806 3.396746  
 H O -4.967136 -3.680277 0.691577  
 H O -2.562470 -3.227925 1.014947  
 H O -5.570244 0.294071 -0.856164  
 H O 2.562468 -3.227928 1.014936  
 H O 4.967133 -3.680281 0.691565  
 H O 5.570245 0.294070 -0.856163  
 H O 0.000018 5.244470 -2.481992  
 H O 0.000005 6.586399 -0.373238  
 H O -0.000013 5.483847 1.818418  
 H O -0.000005 2.705117 4.162754  
 H O 0.895903 4.094474 3.496431  
 H O -0.895922 4.094474 3.496442  
 SCF Done: E(RB3LYP) = -  
 7456.69127954  
 Sum of electronic and zero-point  
 Energies= -7456.404121  
 Sum of electronic and thermal Energies=  
 -7456.376954  
 Sum of electronic and thermal  
 Enthalpies= -7456.376009  
 Sum of electronic and thermal Free  
 Energies= -7456.466666

### 6.3.4 *anti-anti-N-ortho,ortho'*-dimethoxyphenyl-3,9-dibromo-BBTT 4d

#### 6.3.4.1 Minimum geometry of native BBTT in gas phase (B3LYP/6-311++G\*\*)



#p opt freq=noraman rb3lyp/6-311++g(d,p)  
pop=full

0 1  
C 0 5.410298 -1.779330 -0.108516  
C 0 4.571794 -2.835041 0.267318  
C 0 3.214539 -2.608704 0.449968  
C 0 2.683877 -1.323994 0.252546  
C 0 3.561476 -0.284090 -0.134748  
C 0 4.926209 -0.493844 -0.314933  
C 0 1.335259 -0.856661 0.408988  
C 0 1.191701 0.468753 0.128813  
S 0 2.707179 1.238992 -0.347882  
S 0 -0.000043 -1.884754 1.003269  
C 0 -1.335333 -0.856635 0.409002  
C 0 -1.191770 0.468792 0.128828  
N 0 -0.000054 1.191436 0.125288  
C 0 -2.683968 -1.323950 0.252657  
C 0 -3.561581 -0.284025 -0.134557  
S 0 -2.707243 1.239037 -0.347715  
C 0 -3.214639 -2.608657 0.450004  
C 0 -4.571923 -2.834973 0.267431  
C 0 -5.410432 -1.779266 -0.108360  
C 0 -4.926299 -0.493760 -0.314711  
C 0 0.000009 2.618827 0.097568  
C 0 0.000204 3.336943 1.308004  
C 0 0.000291 4.735745 1.287711  
C 0 0.000167 5.393240 0.061390  
C 0 -0.000022 4.703932 -1.146740  
C 0 -0.000090 3.304293 -1.131583

O 0 -0.000237 2.523568 -2.237141  
Br 0 7.284860 -2.115268 -0.349453  
Br 0 -7.284830 -2.115199 -0.349394  
O 0 0.000295 2.583238 2.430518  
C 0 -0.000357 3.142922 -3.520705  
C 0 0.000534 3.233599 3.698928  
H 0 4.984025 -3.824543 0.414954  
H 0 2.565796 -3.427775 0.738371  
H 0 5.588593 0.310012 -0.608458  
H 0 -2.565894 -3.427767 0.738291  
H 0 -4.984081 -3.824515 0.415010  
H 0 -5.588705 0.310107 -0.608165  
H 0 0.000442 5.305760 2.205821  
H 0 0.000228 6.477372 0.046971  
H 0 -0.000104 5.249490 -2.079467  
H 0 -0.000478 2.325425 -4.238726  
H 0 -0.896016 3.754979 -3.664690  
H 0 0.895325 3.754895 -3.664897  
H 0 0.000593 2.433486 4.436284  
H 0 0.896276 3.848871 3.827734  
H 0 -0.895088 3.848989 3.828007

SCF Done: E(RB3LYP) = -  
7471.97169389

Sum of electronic and zero-point  
Energies= -7471.643681

Sum of electronic and thermal Energies=  
-7471.614789

Sum of electronic and thermal  
Enthalpies= -7471.613844

Sum of electronic and thermal Free  
Energies= -7471.707456

#### 6.3.4.2 Minimum geometry of native BBTT under IEFPCM variation of PCM

(B3LYP/6-311++G\*\*, IEFPCM CH<sub>2</sub>Cl<sub>2</sub>)

#p opt freq=noraman rb3lyp/6-311++g(d,p)  
pop=full SCRF=(IEFPCM,Solvent

=Dichloromethane)

0 1  
C 0 5.430596 -1.758355 -0.093544  
C 0 4.594459 -2.835909 0.220621

C 0 3.230620 -2.627384 0.378348  
C 0 2.694419 -1.339065 0.217162  
C 0 3.572717 -0.277028 -0.105546  
C 0 4.943498 -0.468105 -0.261250  
C 0 1.337886 -0.889092 0.353517

|      |           |           |           |                                         |           |           |           |
|------|-----------|-----------|-----------|-----------------------------------------|-----------|-----------|-----------|
| C 0  | 1.191128  | 0.447050  | 0.125100  | C 0                                     | -0.000330 | 3.263735  | 3.683020  |
| S 0  | 2.711572  | 1.248367  | -0.273993 | H 0                                     | 5.009227  | -3.827964 | 0.341362  |
| S 0  | 0.000040  | -1.960897 | 0.864483  | H 0                                     | 2.585536  | -3.463740 | 0.621570  |
| C 0  | -1.337858 | -0.889121 | 0.353572  | H 0                                     | 5.604025  | 0.353317  | -0.505908 |
| C 0  | -1.191113 | 0.446988  | 0.125123  | H 0                                     | -2.585461 | -3.463781 | 0.621662  |
| N 0  | 0.000065  | 1.167975  | 0.128175  | H 0                                     | -5.009203 | -3.827983 | 0.341360  |
| C 0  | -2.694370 | -1.339114 | 0.217151  | H 0                                     | -5.603899 | 0.353217  | -0.506295 |
| C 0  | -3.572658 | -0.277076 | -0.105593 | H 0                                     | -0.000329 | 5.308640  | 2.158799  |
| S 0  | -2.711556 | 1.248321  | -0.274043 | H 0                                     | -0.000184 | 6.451749  | -0.014720 |
| C 0  | -3.230532 | -2.627446 | 0.378354  | H 0                                     | 0.000036  | 5.199743  | -2.126813 |
| C 0  | -4.594366 | -2.835960 | 0.220559  | H 0                                     | 0.000400  | 2.260613  | -4.258646 |
| C 0  | -5.430507 | -1.758420 | -0.093652 | H 0                                     | -0.895119 | 3.693942  | -3.693811 |
| C 0  | -4.943438 | -0.468168 | -0.261421 | H 0                                     | 0.895675  | 3.694003  | -3.693582 |
| C 0  | -0.000017 | 2.597247  | 0.082873  | H 0                                     | -0.000343 | 2.476089  | 4.433041  |
| C 0  | -0.000170 | 3.328300  | 1.286632  | H 0                                     | 0.895053  | 3.879940  | 3.798164  |
| C 0  | -0.000233 | 4.726527  | 1.248495  | H 0                                     | -0.895790 | 3.879850  | 3.798041  |
| C 0  | -0.000141 | 5.368016  | 0.012880  | SCF Done: E(RB3LYP) = -                 |           |           |           |
| C 0  | -0.000013 | 4.664916  | -1.188070 | 7471.98306877                           |           |           |           |
| C 0  | 0.000038  | 3.265891  | -1.156849 | Sum of electronic and zero-point        |           |           |           |
| O 0  | 0.000134  | 2.472654  | -2.253383 | Energies= -7471.655254                  |           |           |           |
| Br 0 | 7.316739  | -2.071773 | -0.301979 | Sum of electronic and thermal Energies= |           |           |           |
| Br 0 | -7.316733 | -2.071830 | -0.302041 | -7471.626343                            |           |           |           |
| O 0  | -0.000207 | 2.589153  | 2.419715  | Sum of electronic and thermal           |           |           |           |
| C 0  | 0.000280  | 3.084168  | -3.548241 | Enthalpies= -7471.625399                |           |           |           |
|      |           |           |           | Sum of electronic and thermal Free      |           |           |           |
|      |           |           |           | Energies= -7471.718893                  |           |           |           |

### 6.3.4.3 Transition state of native BBTT under IEFPCM variation of PCM (B3LYP/6-311++G\*\*,

#### IEFPCM CH<sub>2</sub>Cl<sub>2</sub>)

|                                         |           |           |           |          |           |           |           |
|-----------------------------------------|-----------|-----------|-----------|----------|-----------|-----------|-----------|
| #p opt=(ts,noeigen,calcfc) freq=noraman | C 0       | 0.000021  | 4.645791  | 1.219033 |           |           |           |
| B3LYP/6-311++g(d,p) pop=full s          | C 0       | -2.719378 | -1.364638 | 0.000002 |           |           |           |
| crf=(iefpcm,solvent=dichloromethane)    | C 0       | 0.000017  | 3.246836  | 1.222635 |           |           |           |
| 0 1                                     | C 0       | 0.000001  | 2.547185  | 0.000003 |           |           |           |
| Br 0                                    | -7.388575 | -1.975426 | -0.000002 | C 0      | -1.192171 | 0.400700  | -0.000013 |
| S 0                                     | -0.000001 | -2.136498 | 0.000026  | C 0      | -1.343929 | -0.954157 | -0.000006 |
| S 0                                     | -2.727542 | 1.267390  | -0.000007 | C 0      | -3.265564 | -2.659240 | 0.000012  |
| O 0                                     | 0.000003  | 2.479551  | 2.336634  | C 0      | 0.000005  | 5.317891  | 0.000003  |
| N 0                                     | -0.000000 | 1.118174  | 0.000003  | C 0      | -3.602998 | -0.259106 | -0.000000 |

|      |           |           |           |                                         |           |           |           |
|------|-----------|-----------|-----------|-----------------------------------------|-----------|-----------|-----------|
| C 0  | -4.986730 | -0.413490 | 0.000006  | H 0                                     | -5.650656 | 0.440917  | 0.000011  |
| C 0  | -4.643765 | -2.830579 | 0.000016  | H 0                                     | -5.066323 | -3.826625 | 0.000021  |
| C 0  | -5.483635 | -1.711322 | 0.000014  | H 0                                     | 0.000131  | 2.314914  | 4.346543  |
| C 0  | 0.000092  | 3.121559  | 3.616984  | H 0                                     | -0.895389 | 3.734535  | 3.747779  |
| Br 0 | 7.388573  | -1.975429 | -0.000017 | H 0                                     | 0.895571  | 3.734511  | 3.747661  |
| S 0  | 2.727541  | 1.267388  | -0.000010 | H 0                                     | -0.000020 | 5.204780  | -2.143660 |
| O 0  | 0.000001  | 2.479551  | -2.336628 | H 0                                     | 2.619589  | -3.529606 | 0.000019  |
| C 0  | -0.000013 | 4.645791  | -1.219026 | H 0                                     | 5.650654  | 0.440914  | -0.000042 |
| C 0  | 2.719376  | -1.364640 | 0.000010  | H 0                                     | 5.066320  | -3.826627 | -0.000001 |
| C 0  | -0.000012 | 3.246836  | -1.222629 | H 0                                     | -0.000124 | 2.314915  | -4.346537 |
| C 0  | 1.192169  | 0.400699  | 0.000020  | H 0                                     | 0.895399  | 3.734532  | -3.747772 |
| C 0  | 1.343927  | -0.954158 | 0.000026  | H 0                                     | -0.895561 | 3.734513  | -3.747656 |
| C 0  | 3.265561  | -2.659242 | 0.000010  | SCF Done: E(RB3LYP) = -                 |           |           |           |
| C 0  | 3.602996  | -0.259108 | -0.000007 | 7471.98282800                           |           |           |           |
| C 0  | 4.986728  | -0.413492 | -0.000023 | Sum of electronic and zero-point        |           |           |           |
| C 0  | 4.643762  | -2.830581 | -0.000004 | Energies= -7471.655106                  |           |           |           |
| C 0  | 5.483633  | -1.711324 | -0.000021 | Sum of electronic and thermal Energies= |           |           |           |
| C 0  | -0.000084 | 3.121560  | -3.616978 | -7471.627066                            |           |           |           |
| H 0  | 0.000030  | 5.204780  | 2.143666  | Sum of electronic and thermal           |           |           |           |
| H 0  | -2.619592 | -3.529605 | 0.000017  | Enthalpies= -7471.626122                |           |           |           |
| H 0  | 0.000006  | 6.401957  | 0.000003  | Sum of electronic and thermal Free      |           |           |           |
|      |           |           |           | Energies= -7471.715927                  |           |           |           |

## 7 References

1. L. J. Farrugia, *J. Appl. Crystallogr.*, 2012, **45**, 849-854.
2. C. F. Macrae, I. Sovago, S. J. Cottrell, P. T. A. Galek, P. McCabe, E. Pidcock, M. Platings, G. P. Shields, J. S. Stevens, M. Towler and P. A. Wood, *J. Appl. Crystallogr.*, 2020, **53**, 226-235.
3. P. R. Spackman, M. J. Turner, J. J. McKinnon, S. K. Wolff, D. J. Grimwood, D. Jayatilaka and M. A. Spackman, *J. Appl. Crystallogr.*, 2021, **54**, 1006-1011.
4. A. P. W. Schneeweis, S. T. Hauer, D. A. Lopez, B. von Dressler, G. J. Reiss and T. J. J. Müller, *J. Org. Chem.*, 2019, **84**, 5582-5595.
5. H. R. V. Berens, K. Mohammad, G. J. Reiss and T. J. J. Müller, *J. Org. Chem.*, 2021, **86**, 8000-8014.
6. A. P. W. Schneeweis, S. T. Hauer, G. J. Reiss and T. J. J. Müller, *Chem. Eur. J.*, 2019, **25**, 3582-3590.
7. Z. Chen, C. S. Wannere, C. Corminboeuf, R. Puchta and P. v. R. Schleyer, *Chem. Rev.*, 2005, **105**, 3842-3888.
8. A. Stanger, Nucleus-Independent Chemical Shifts (NICS): *J. Org. Chem.*, 2006, **71**, 883-893.
9. N. Elgrishi, K. J. Rountree, B. D. McCarthy, E. S. Rountree, T. T. Eisenhart and J. L. Dempsey, *J. Chem. Educ.*, 2018, **95**, 197-206.
10. R. R. Gagne, C. A. Koval and G. C. Lisensky, *Inorg. Chem.*, 1980, **19**, 2854-2855.
11. I. Noviadri, K. N. Brown, D. S. Fleming, P. T. Gulyas, P. A. Lay, A. F. Masters and L. Phillips, *The Journal of Physical Chemistry B*, 1999, **103**, 6713-6722.
12. Y. Fu, L. Liu, H.-Z. Yu, Y.-M. Wang and Q.-X. Guo, *J. Am. Chem. Soc.*, 2005, **127**, 7227-7234.
13. M. J. Frisch, G. W. Trucks, H. B. Schlegel, G. E. Scuseria, M. A. Robb, J. R. Cheeseman, G. Scalmani, V. Barone, B. Mennucci, G. A. Petersson, H. Nakatsuji, M. Caricato, X. Li, H. P. Hratchian, A. F. Izmaylov, J. Bloino, G. Zheng, J. L. Sonnenberg, M. Hada, M. Ehara, K. Toyota, R. Fukuda, J. Hasegawa, M. Ishida, T. Nakajima, Y. Honda, O. Kitao, H. Nakai, T. Vreven, J. J. A. Montgomery, J. E. Peralta, F. Ogliaro, M. Bearpark, J. J. Heyd, E. Brothers, K. N. Kudin, V. N. Staroverov, R. Kobayashi, J. Normand, K. Raghavachari, A. Rendell, J. C. Burant, S. S. Iyengar, J. Tomasi, M.

- Cossi, N. Rega, J. M. Millam, M. Klene, J. E. Knox, J. B. Cross, V. Bakken, C. Adamo, J. Jaramillo, R. Gomperts, R. E. Stratmann, O. Yazyev, A. J. Austin, R. Cammi, C. Pomelli, J. W. Ochterski, R. L. Martin, K. Morokuma, V. G. Zakrzewski, G. A. Voth, P. Salvador, J. J. Dannenberg, S. Dapprich, A. D. Daniels, O. Farkas, J. B. Foresman, J. V. Ortiz, J. Cioslowski and D. J. Fox, Gaussian 09, Revision A.02. *Journal*, 2009.
14. A. D. Becke, The role of exact exchange, *J. Phys. Chem.*, 1993, **98**, 5648-5652.
  15. C. Lee, W. Yang and R. G. Parr, *Phys. Rev. B*, 1988, **37**, 785-789.
  16. C. Adamo and V. Barone, *J. Phys. Chem.*, 1999, **110**, 6158-6170.
  17. R. Krishnan, J. S. Binkley, R. Seeger and J. A. Pople, *J. Phys. Chem.*, 1980, **72**, 650-654.
  18. A. D. McLean and G. S. Chandler, *J. Phys. Chem.*, 1980, **72**, 5639-5648.
  19. M. J. Frisch, J. A. Pople and J. S. Binkley, *J. Phys. Chem.*, 1984, **80**, 3265-3269.
  20. T. Clark, J. Chandrasekhar, G. W. Spitznagel and P. V. R. Schleyer, *J. Comput. Chem.*, 1983, **4**, 294-301.
  21. G. Scalmani and M. J. Frisch, *J. Phys. Chem.*, 2010, **132**, 114110.
  22. A. V. Marenich, C. J. Cramer and D. G. Truhlar, *J. Phys. Chem. B*, 2009, **113**, 6378-6396.
  23. E. Runge and E. K. U. Gross, *Phys. Rev. Lett.*, 1984, **52**, 997-1000.
  24. R. Bauernschmitt and R. Ahlrichs, *Chem. Phys. Lett.*, 1996, **256**, 454-464.
